# Supplementary material for: Cell-type diversity and regionalized gene expression in the planarian intestine
Source: eLife. 2020 Apr 2;9:e52613. doi: 10.7554/eLife.52613 (PMC7117911; doi:10.7554/eLife.52613)
Supplement: Figure 2—source data 1. — (F2SD1-A) RNA-Seq data (LCM) vs. phagocyte expression (sorted phagocytes) for 1317 intestine-enriched transcripts (LCM) represented in phagocyte expression profile. (F2SD1-B) RNA-Seq data (LCM) vs. phagocyte expression (sorted phagocytes) for 900 transcripts with high phagocyte expression. (F2SD1-C) RNA-Seq data (LCM) vs. phagocyte expression (sorted phagocytes) for 358 transcripts with moderate phagocyte expression. (F2SD1-D) RNA-Seq data (LCM) vs. phagocyte expression (sorted phagocytes) for 59 transcripts with low phagocyte expression. (F2SD1-E) Mapping of dd_Smed_v6 transcripts to Contig/EST sequences from Zayas et al. (2005). [file elife-52613-fig2-data1.xlsx]

## Sheet: F2SD1-A. All_1317_LCM_vs_Phagos
geneID	uniprot_id_human	uniprot_desc_human	uniprot_id_all5best	uniprot_desc_all5best	EST_ID	phagocyte_log2FC	phagocyte_avgExpr	phagocyte_FDR	logFC_medial	logCPM_medial	FDR_medial	logFC_lateral	logCPM_lateral	FDR_lateral
dd_Smed_v6_1_0_1	NA	NA	NA	NA	Contig4465	4.83036	14.3184	2.29e-05	6.49054	16.7728	3.05e-33	6.35771	16.7728	2.96e-32
dd_Smed_v6_10_1_1	COLEC10	Collectin-10	zgc:172053	Zgc:172053	Contig4399	-0.119826	12.7967	0.697142	4.57657	13.7949	7.67e-30	4.82941	13.7949	2.55e-32
dd_Smed_v6_100_0_1	NA	NA	NA	NA	Contig60	4.0523	11.8123	3.32e-05	6.84412	8.57273	3.34e-40	7.16661	8.57273	9.34e-43
dd_Smed_v6_10002_0_1	GNPTG	N-acetylglucosamine-1-phosphotransferase subunit gamma	Gnptg	N-acetylglucosamine-1-phosphotransferase subunit gamma	Contig1198	1.33243	7.72052	0.000156056	3.03691	1.46492	0.000308495	3.42874	1.46492	5.73e-05
dd_Smed_v6_1002_0_1	SORD	Sorbitol dehydrogenase	Sord	Sorbitol dehydrogenase	Contig3716	0.389085	9.23378	0.00909352	2.67655	7.89183	4.02e-21	2.58944	7.89183	6.82e-20
dd_Smed_v6_10025_0_1	NA	NA	NA	NA	Contig6864	1.03401	6.85262	0.00379773	3.36614	3.88147	6.18e-19	3.40522	3.88147	2.84e-19
dd_Smed_v6_10043_0_1	NA	NA	NA	NA	Contig1558	0.795813	6.51008	0.00530423	6.05319	4.42858	1.29e-25	6.11517	4.42858	5.88e-26
dd_Smed_v6_10051_0_1	STRA6	Stimulated by retinoic acid gene 6 protein homolog	stra6l	STRA6-like	PL08004A2G12	0.433905	6.35905	0.296496	4.2524	3.29572	2.95e-13	4.24516	3.29572	3.67e-13
dd_Smed_v6_10059_0_1	NA	NA	NA	NA	Contig3003	0.516411	6.81272	0.0338611	3.70599	3.43055	4.64e-20	3.39425	3.43055	2.83e-17
dd_Smed_v6_1008_0_1	RNASET2	Ribonuclease T2	rnaset2	Ribonuclease T2	Contig758	4.26327	11.7994	2.29e-05	5.88872	7.43381	8.87e-46	5.55056	7.43381	5.81e-42
dd_Smed_v6_1009_0_1	LIN7B	Protein lin-7 homolog B	Lin7b	Protein lin-7 homolog B	Contig5190	0.824981	9.21782	0.00122862	1.04968	7.46663	0.000244935	0.867773	7.46663	0.00337201
dd_Smed_v6_1009_1_1	SLC8B1	Sodium/potassium/calcium exchanger 6, mitochondrial	Slc8b1	Sodium/potassium/calcium exchanger 6, mitochondrial	PL05007B1C09	2.08704	8.16411	0.000799309	3.40152	5.36096	2.3e-33	3.29658	5.36096	1.33e-31
dd_Smed_v6_101_0_1	EPPIN	Eppin	EPPIN	Eppin	Contig6658	-1.35649	11.0214	0.00197665	4.20835	12.4895	1.05e-23	6.34884	12.4895	1.86e-43
dd_Smed_v6_10103_0_1	RREB1	Ras-responsive element-binding protein 1	rreb1a	Ras-responsive element-binding protein 1a	Contig7148	-0.0947495	6.30142	0.465758	1.5458	2.52489	0.00475282	2.04319	2.52489	0.000156812
dd_Smed_v6_10160_0_1	SLC39A1	Zinc transporter ZIP1	SLC39A1	Zinc transporter ZIP1	Contig2670	2.29772	8.1621	3.4e-05	10.9602	3.87037	2.73e-62	10.5503	3.87037	6.67e-58
dd_Smed_v6_10167_0_1	STXBP2	Syntaxin-binding protein 2	STXBP2	Syntaxin-binding protein 2	Contig4564	-0.140489	6.34882	0.496675	1.27288	4.07807	0.00218316	1.86112	4.07807	5.2e-06
dd_Smed_v6_10182_0_1	PGAP2	Post-GPI attachment to proteins factor 2	CG7990	Post-GPI attachment to proteins factor 2-like	Contig4671	0.0709514	7.95	0.641983	1.89942	2.98133	0.00497426	2.15291	2.98133	0.0015123
dd_Smed_v6_1019_0_1	SYNJ1	Synaptojanin-1	Synj2	Synaptojanin-2	Contig4519	-0.233035	9.46069	0.132048	1.58993	7.24766	7.06e-07	0.838511	7.24766	0.0149782
dd_Smed_v6_1020_0_1	PHKG1	Phosphorylase b kinase gamma catalytic chain, skeletal muscle/heart isoform	PhKgamma	Phosphorylase kinase gamma, isoform F	Contig6368	0.222103	6.54409	0.124817	1.90464	7.84876	9.95e-11	1.76752	7.84876	2.36e-09
dd_Smed_v6_1022_0_1	NA	NA	NA	NA	Contig6766	3.28115	11.1433	0.000845777	6.99577	8.48647	1.19e-62	6.71158	8.48647	4.39e-59
dd_Smed_v6_1026_0_1	ACSBG2	Long-chain-fatty-acid--CoA ligase ACSBG2	Acsbg2	Long-chain-fatty-acid--CoA ligase ACSBG2	Contig4874	-0.121091	8.44206	0.584169	1.24476	7.83478	0.000324098	1.03221	7.83478	0.00391336
dd_Smed_v6_1029_1_1	NA	NA	NA	NA	Contig6700	3.44383	9.19239	0.00064886	5.87052	8.19521	2.88e-56	5.80343	8.19521	2.79e-55
dd_Smed_v6_10356_0_1	NA	NA	NA	NA	Contig2151	1.59492	7.75597	0.00164821	2.43281	3.92746	1.39e-08	1.89375	3.92746	1.19e-05
dd_Smed_v6_10359_0_1	NA	NA	NA	NA	Contig1076	0.930377	7.01859	0.00295655	3.58527	4.04682	1.83e-23	3.92093	4.04682	3.07e-27
dd_Smed_v6_1037_0_1	RAB32	Ras-related protein Rab-32	Rab32	Ras-related protein Rab-32	Contig5808	2.48048	10.2417	3.27e-05	2.64599	7.00811	2.2e-20	2.4488	7.00811	9.3e-18
dd_Smed_v6_10397_0_1	PAQR3	Progestin and adipoQ receptor family member 3	paqr3b	Progestin and adipoQ receptor family member IIIb	Contig6707	0.530233	7.09574	0.118336	1.62781	4.87701	3.24e-07	1.29147	4.87701	6.99e-05
dd_Smed_v6_1045_0_1	EEF1B2	Elongation factor 1-beta	EEF1B2	Elongation factor 1-beta	Contig4222	0.127195	8.29864	0.476044	1.04516	6.49642	0.0168328	1.14304	6.49642	0.00933379
dd_Smed_v6_1048_0_1	SLC37A2	Glucose-6-phosphate exchanger SLC37A2	slc37a2	Glucose-6-phosphate exchanger SLC37A2	Contig1560	0.767019	7.72962	0.00252561	1.69898	5.40334	3.93e-09	1.3481	5.40334	4.23e-06
dd_Smed_v6_1050_0_1	RAC2	Ras-related C3 botulinum toxin substrate 2	Rac1	Ras-related protein Rac1	Contig5264	0.730085	7.86825	0.0174341	1.238	6.63087	1.22e-05	0.945424	6.63087	0.0012164
dd_Smed_v6_1053_0_1	NA	NA	CG1637	Purple acid phosphatase	Contig1731	2.11179	8.64176	0.000204553	2.55581	6.56911	2.75e-20	1.98223	6.56911	6.34e-13
dd_Smed_v6_1060_0_1	ALDH18A1	Delta-1-pyrroline-5-carboxylate synthase	Aldh18a1	Delta-1-pyrroline-5-carboxylate synthase	Contig6799	-1.23018	9.11656	0.00203392	1.08463	7.23322	0.000234215	1.10761	7.23322	0.000193427
dd_Smed_v6_1065_0_1	CLINT1	Clathrin interactor 1	clint1a	Clathrin interactor 1	Contig5397	0.500896	8.76983	0.00534265	1.59019	5.20335	1.16e-06	1.63203	5.20335	6.83e-07
dd_Smed_v6_10656_0_1	SLC16A9	Monocarboxylate transporter 9	slc16a9a	Solute carrier family 16, member 9a	Contig2353	1.85825	7.61356	0.000143555	3.97235	4.52991	8.38e-23	3.80588	4.52991	3.27e-21
dd_Smed_v6_1067_0_1	ATP6AP2	Renin receptor	atp6ap2	ATPase, H+-transporting, lysosomal accessory protein 2	Contig6838	2.22917	9.36782	0.000749314	2.53239	6.33974	8.83e-19	2.21787	6.33974	7.71e-15
dd_Smed_v6_1068_0_1	NA	NA	NA	NA	Contig6709	2.27694	9.41739	0.000923161	6.01543	8.76091	2.68e-49	6.25271	8.76091	5.26e-52
dd_Smed_v6_10699_0_1	PEX3	Peroxisomal biogenesis factor 3	PEX3	Peroxisomal biogenesis factor 3	Contig3365	0.290391	6.95856	0.0468835	1.28365	4.36783	9.86e-05	0.707059	4.36783	0.0517814
dd_Smed_v6_10744_0_1	PM20D2	Peptidase M20 domain-containing protein 2	PM20D2	Peptidase M20 domain-containing protein 2	PL05004A1H06	0.43033	7.15893	0.0520456	3.32286	4.70666	1.48e-17	3.00139	4.70666	9.11e-15
dd_Smed_v6_10758_0_1	WDR41	WD repeat-containing protein 41	WDR41	WD repeat-containing protein 41	PL06013A1B06	0.775963	7.00935	0.0250546	4.17771	3.19896	4.86e-10	4.47079	3.19896	4.81e-11
dd_Smed_v6_1079_0_1	TMEM55A	Type 2 phosphatidylinositol 4,5-bisphosphate 4-phosphatase	Dmel\CG6707	CG6707, isoform B	Contig1068	2.08828	9.93372	0.000486662	2.10158	6.10495	1.22e-07	1.99546	6.10495	5.99e-07
dd_Smed_v6_10855_0_1	NA	NA	NA	NA	PL06023A2H08	0.474219	6.73724	0.0594049	3.60243	3.92235	1.35e-07	3.35557	3.92235	9.13e-07
dd_Smed_v6_1088_0_1	TGFBI	Transforming growth factor-beta-induced protein ig-h3	TGFBI	Transforming growth factor-beta-induced protein ig-h3	PL06010A1C04	0.058081	6.63381	0.687523	5.78955	7.29847	5.2e-57	5.73917	7.29847	3.24e-56
dd_Smed_v6_10910_0_1	NA	NA	NA	NA	Contig7029	1.82294	7.76277	0.000854245	6.99224	4.20544	7.5e-26	6.84099	4.20544	5.09e-25
dd_Smed_v6_10915_0_1	NA	NA	NA	NA	Contig2562	0.70817	6.15987	0.00675023	4.25062	3.81098	8.92e-15	4.17832	3.81098	2.51e-14
dd_Smed_v6_10923_0_1	NA	NA	NA	NA	Contig3199	0.549921	6.60506	0.0101627	6.16048	3.30536	6.07e-14	5.92916	3.30536	3.79e-13
dd_Smed_v6_11_0_1	NA	NA	CG10527	LD46156p	Contig1963	2.84316	12.3652	2.7e-05	3.62688	11.696	9.77e-22	3.52801	11.696	1e-20
dd_Smed_v6_11025_0_1	PXMP4	Peroxisomal membrane protein 4	PXMP4	Peroxisomal membrane protein 4	Contig2841	0.101414	7.60902	0.549102	1.0717	3.93911	0.00529554	0.898121	3.93911	0.025202
dd_Smed_v6_11031_0_1	NA	NA	NA	NA	Contig5461	1.0542	7.52556	0.00185518	8.02419	-0.187425	9.44e-06	7.9028	-0.187425	1.4e-05
dd_Smed_v6_11047_0_1	NA	NA	NA	NA	PL06016B1E11	0.589594	6.56501	0.0064788	4.43331	2.49642	8.16e-08	4.66088	2.49642	2.44e-08
dd_Smed_v6_1107_0_1	UBA1	Ubiquitin-like modifier-activating enzyme 1	UBA1	Ubiquitin-like modifier-activating enzyme 1	Contig931	0.99153	8.54574	0.000164273	1.30617	7.11796	1.25e-05	1.07065	7.11796	0.000470233
dd_Smed_v6_1109_0_1	KY	Kyphoscoliosis peptidase	Hil	Hillarin	Contig6471	0.664933	8.95336	0.00731751	1.38094	5.39692	0.00018376	1.37292	5.39692	0.000232457
dd_Smed_v6_11093_0_1	NA	NA	NA	NA	Contig6386	0.401799	7.24296	0.066101	1.935	3.92449	1.13e-07	2.18244	3.92449	2.4e-09
dd_Smed_v6_11109_0_1	NA	NA	NA	NA	PL030004A10D12	1.30385	7.92781	0.000888513	6.13426	0.532382	1.95e-05	6.21524	0.532382	1.81e-05
dd_Smed_v6_11197_0_1	PLPP4	Phospholipid phosphatase 4	PLPP4	Phospholipid phosphatase 4	Contig850	-0.109716	6.13253	0.178644	1.774	2.25715	0.00707022	1.79239	2.25715	0.00732935
dd_Smed_v6_1120_0_1	NA	NA	unc-9	Innexin unc-9	Contig763	2.62248	10.567	5.92e-05	6.38741	8.14804	6.12e-69	6.15747	8.14804	2.01e-65
dd_Smed_v6_1122_0_1	SPTBN1	Spectrin beta chain, non-erythrocytic 1	unc-70	Spectrin beta chain	PL04020B2G03	0.130998	7.49879	0.424806	1.08972	8.45556	0.000688073	0.990411	8.45556	0.00259245
dd_Smed_v6_1123_0_1	DPP7	Dipeptidyl peptidase 2	dpp7	Dipeptidyl-peptidase 7	Contig5265	2.35946	9.12193	0.000299452	3.1765	7.06298	8.49e-26	3.05997	7.06298	3.49e-24
dd_Smed_v6_1124_0_1	NA	NA	NA	NA	Contig319	1.16257	9.45672	0.000371787	1.45365	6.61961	8.6e-05	1.29864	6.61961	0.000573056
dd_Smed_v6_11251_0_1	DHDH	Trans-1,2-dihydrobenzene-1,2-diol dehydrogenase	dhdh	Trans-1,2-dihydrobenzene-1,2-diol dehydrogenase	Contig4234	1.09137	7.46134	0.00068954	4.54402	3.44905	1.92e-19	3.96268	3.44905	1.4e-15
dd_Smed_v6_11252_0_1	KANK1	KN motif and ankyrin repeat domain-containing protein 1	Kank1	Kank1 protein	PL08006B1H10	0.203407	7.04143	0.136033	1.82798	3.77423	3.76e-05	2.02324	3.77423	5.54e-06
dd_Smed_v6_1127_0_1	HEL-S-182mP	Glycine N-methyltransferase	Gnmt	Glycine N-methyltransferase	Contig3695	-0.633554	8.45302	0.00154633	4.58207	6.64068	1.94e-29	4.81552	6.64068	1.04e-31
dd_Smed_v6_11287_0_1	CALB2	Calretinin	Cbp53E	Calbindin-32	Contig7165	-0.136393	5.87442	0.437906	2.2023	2.50107	3.3e-05	1.59584	2.50107	0.00358554
dd_Smed_v6_11295_1_1	AURKC	Aurora kinase C	Aurkc	Aurora kinase C	Contig6780	0.0729926	6.32106	0.569777	3.13674	1.86863	0.000526944	2.46714	1.86863	0.00754557
dd_Smed_v6_1130_0_1	SERINC3	Serine incorporator 3	serinc1	Serine incorporator 1	Contig4476	0.435717	8.12036	0.0224521	1.08542	6.34727	0.00255958	0.584741	6.34727	0.15242
dd_Smed_v6_1133_0_1	ATG12	Ubiquitin-like protein ATG12	ATG12	Ubiquitin-like protein ATG12	Contig3614	1.08248	8.88386	0.000772869	1.41511	5.42831	1.09e-07	1.26924	5.42831	2.45e-06
dd_Smed_v6_11404_0_1	BNIP1	Vesicle transport protein SEC20	bnip1a	BCL2/adenovirus E1B-interacting protein 1a	Contig2452	0.549217	6.56217	0.00297962	0.559013	3.13349	0.288306	1.23767	3.13349	0.00857506
dd_Smed_v6_11420_0_1	NA	NA	Naam	LD05707p	Contig7091	1.48116	7.12949	0.00138644	4.93539	2.35316	7.7e-12	4.71682	2.35316	5.56e-11
dd_Smed_v6_1144_0_1	TNXB	Tenascin-X	Tnxb	Tenascin X	Contig6089	0.928018	10.1309	0.00324298	5.0464	9.21049	2.39e-55	4.98509	9.21049	2.8e-54
dd_Smed_v6_11479_0_1	NA	NA	NA	NA	Contig3349	0.689956	6.78462	0.0012502	1.06988	4.24991	0.00158014	1.19278	4.24991	0.000422513
dd_Smed_v6_1148_0_1	C12orf10	Chromosome 12 open reading frame 10	myg1	Melanocyte proliferating gene 1	Contig1790	-0.129443	10.0232	0.421624	1.61545	3.82784	0.00431086	1.4635	3.82784	0.0118879
dd_Smed_v6_115_0_1	NA	NA	NA	NA	Contig7220	-0.265365	12.8775	0.297668	5.39234	9.54961	1.19e-30	5.66839	9.54961	6.71e-33
dd_Smed_v6_1156_0_1	VMP1	Vacuole membrane protein 1	vmp1	Vacuole membrane protein 1	Contig6172	0.838587	10.0062	0.00721924	1.49397	5.63603	1.82e-06	1.32817	5.63603	2.81e-05
dd_Smed_v6_1158_0_1	CHMP5	Charged multivesicular body protein 5	Chmp5	Charged multivesicular body protein 5	Contig3148	1.66171	9.27981	0.000218059	1.36605	8.02637	8.95e-07	1.14285	8.02637	5.41e-05
dd_Smed_v6_11586_0_1	SLC39A13	Zinc transporter ZIP13	Slc39a13	Zinc transporter ZIP13	Contig2544	0.0425047	6.06368	0.643741	1.78321	4.7043	3.57e-06	1.5397	4.7043	7.85e-05
dd_Smed_v6_1159_0_1	SLC22A6	Solute carrier family 22 member 6	Orct	Organic cation transporter protein	Contig1815	-0.406919	8.2542	0.0129047	4.88615	6.78214	4.4e-35	5.13731	6.78214	7.88e-38
dd_Smed_v6_1162_0_1	NA	NA	NA	NA	Contig3344	1.51762	8.20287	0.00096844	1.86626	4.96776	1.13e-06	1.73467	4.96776	7.26e-06
dd_Smed_v6_1163_0_1	TRAF6	TNF receptor-associated factor 6	TRAF6	TNF receptor-associated factor 6	Contig5533	3.02547	9.79346	4.33e-05	1.9301	7.89997	7.72e-11	2.00106	7.89997	1.84e-11
dd_Smed_v6_1165_0_1	CAPZB	F-actin-capping protein subunit beta	cpb	F-actin-capping protein subunit beta	Contig1530	1.70079	9.42893	5e-05	1.31798	7.55216	4.56e-06	1.21417	7.55216	2.99e-05
dd_Smed_v6_11653_0_1	NELL1	Protein kinase C-binding protein NELL1	NELL1	Protein kinase C-binding protein NELL1	Contig4246	0.159773	6.07278	0.51727	1.66711	2.63028	0.00227383	1.79102	2.63028	0.00111151
dd_Smed_v6_1167_0_1	CASP7	Caspase-7	casp3b	Caspase 3, apoptosis-related cysteine peptidase b	Contig2992	1.47514	10.1189	4.04e-05	2.20701	7.37583	2.81e-12	1.94326	7.37583	8.76e-10
dd_Smed_v6_1171_0_1	SLC13A3	Solute carrier family 13 member 3	slc13a5a	Sodium-dependent citrate transporter	Contig7480	2.83985	8.6752	0.000625045	6.71202	7.19283	2.59e-67	6.6005	7.19283	1.72e-65
dd_Smed_v6_11714_0_1	NR1I3	Nuclear receptor subfamily 1 group I member 3	vdrb	Vitamin D3 receptor B	Contig2962	1.02675	6.56823	0.180683	3.13654	4.23782	6.39e-19	3.15088	4.23782	5.01e-19
dd_Smed_v6_11741_0_1	B3GALNT1	UDP-GalNAc:beta-1,3-N-acetylgalactosaminyltransferase 1	B3GALNT1	UDP-GalNAc:beta-1,3-N-acetylgalactosaminyltransferase 1	Contig2368	0.520376	6.78142	0.0136855	3.95166	2.51193	8.25e-06	4.08881	2.51193	4.96e-06
dd_Smed_v6_11807_0_1	SLC6A19	Sodium-dependent neutral amino acid transporter B(0)AT1	SerT	Sodium-dependent serotonin transporter	Contig92	1.9174	7.26409	0.00010083	5.54348	2.49242	3.15e-12	5.26935	2.49242	2.8e-11
dd_Smed_v6_11818_0_1	SLC15A4	Solute carrier family 15 member 4	SLC15A4	Solute carrier family 15 member 4	PL05017B1B03	0.592897	6.40355	0.0115357	2.04827	4.48799	1.66e-07	2.13421	4.48799	5.65e-08
dd_Smed_v6_11845_0_1	NA	NA	NA	NA	Contig7303	1.86231	8.29877	0.0110221	7.12928	3.64012	1.6e-41	6.81706	3.64012	1.07e-38
dd_Smed_v6_11859_0_1	NA	NA	NA	NA	PL06023B1A06	0.481568	7.03155	0.0411797	3.59614	1.61713	0.000421589	3.48321	1.61713	0.000716429
dd_Smed_v6_11936_0_1	ARHGEF10	Rho guanine nucleotide exchange factor 10	Arhgef10	Rho guanine nucleotide exchange factor 10	PL06020B2B10	0.339585	6.92918	0.234555	1.60556	4.09002	7.66e-05	1.79042	4.09002	1.09e-05
dd_Smed_v6_1195_0_1	SYNGR1	Synaptogyrin-1	syngr3a	Synaptogyrin	Contig7705	0.444705	7.89767	0.13865	1.22205	6.24458	1.5e-05	0.968338	6.24458	0.000854325
dd_Smed_v6_12018_0_1	SEMA4A	Semaphorin-4A	smp-1	Semaphorin-1A	Contig5140	1.13033	6.82573	0.000832641	4.59647	2.25157	6.29e-07	4.50137	2.25157	1.17e-06
dd_Smed_v6_1204_0_1	EIF4EBP2	Eukaryotic translation initiation factor 4E-binding protein 2	eif4ebp2	Eukaryotic translation initiation factor 4E binding protein 2	Contig6575	-0.460453	9.64445	0.130856	1.55384	5.4977	0.000400186	1.49414	5.4977	0.000790313
dd_Smed_v6_1212_0_1	MAP3K3	Mitogen-activated protein kinase kinase kinase 3	map3k3	Mitogen-activated protein kinase kinase kinase 3	Contig764	1.52631	9.06384	0.000125859	2.18919	5.55119	4.27e-08	2.05279	5.55119	3.25e-07
dd_Smed_v6_1216_0_1	NA	NA	NA	NA	Contig474	1.39073	8.77115	0.0001838	1.03001	6.55861	0.000213636	0.967618	6.55861	0.00062484
dd_Smed_v6_12185_0_1	NA	NA	NA	NA	PL06010A2E11	0.287655	6.43131	0.108747	1.4541	3.57366	0.000936841	1.4601	3.57366	0.00100997
dd_Smed_v6_122_0_1	TENM2	Teneurin-2	skpo-2	ShK domain and PerOxidase domain containing protein	Contig1776	-1.19646	9.45407	0.001013	9.40517	10.1113	5.69e-31	5.88195	10.1113	1.17e-16
dd_Smed_v6_122_1_1	LIPA	Lysosomal acid lipase/cholesteryl ester hydrolase	LIPA	Lysosomal acid lipase/cholesteryl ester hydrolase	Contig1062	-0.291152	11.1507	0.228416	5.22773	10.5841	1.68e-30	5.49513	10.5841	9.29e-33
dd_Smed_v6_12219_0_1	HELZ2	Helicase with zinc finger domain 2	Helz2	Helicase with zinc finger domain 2	PL06021A1F10	-0.0711373	5.74597	0.592777	1.95036	3.70749	1.85e-06	2.4561	3.70749	2.09e-09
dd_Smed_v6_12262_0_1	NOG	Noggin	Nog	Noggin	Contig1936	1.59799	7.60282	6.11e-05	6.19462	4.29128	2.45e-49	6.07525	4.29128	7.35e-48
dd_Smed_v6_12311_0_1	SLC16A12	Monocarboxylate transporter 12	slc16a12b	Monocarboxylate transporter 12-B	PL05001B2H12	0.432821	6.62451	0.236121	1.74822	2.84691	0.00218702	2.00942	2.84691	0.000437652
dd_Smed_v6_12313_0_1	MDGA1	MAM domain-containing glycosylphosphatidylinositol anchor protein 1	MDGA1	MAM domain-containing glycosylphosphatidylinositol anchor protein 1	PL06012B1B10	0.154724	6.29956	0.218897	1.4051	3.14074	0.00353208	1.53844	3.14074	0.00144013
dd_Smed_v6_1233_0_1	MAST4	Microtubule-associated serine/threonine-protein kinase 4	mast2	Microtubule-associated serine/threonine kinase 2	Contig687	0.975219	7.9327	0.00621731	1.81621	5.93202	1.84e-11	1.64899	5.93202	1.33e-09
dd_Smed_v6_12376_0_1	TMC5	Transmembrane channel-like protein 5	Tmc7	Transmembrane channel-like protein 7	Contig5514	1.99562	7.83619	9.8e-05	3.19017	2.50916	2.12e-07	3.23711	2.50916	1.65e-07
dd_Smed_v6_1240_0_1	NA	NA	NA	NA	Contig708	2.12591	8.8606	4.87e-05	6.09792	6.70489	1.66e-58	6.16733	6.70489	2.19e-59
dd_Smed_v6_12427_0_1	TWNK	Twinkle protein, mitochondrial	mtDNA-helicase	LD38710p	Contig1941	0.402888	6.24154	0.0245536	1.83838	2.35959	0.00391665	1.73253	2.35959	0.00778692
dd_Smed_v6_1246_0_1	NA	NA	COX6AL	Cytochrome c oxidase subunit 6A-like	Contig7362	-0.311067	9.11943	0.257617	1.30193	7.56119	0.000371909	1.03726	7.56119	0.00635458
dd_Smed_v6_12502_0_1	NA	NA	CG10527	Uncharacterized protein	Contig2019	1.13179	6.65286	0.000515484	3.57567	4.49724	4e-11	3.7292	4.49724	8.38e-12
dd_Smed_v6_1251_0_1	FHL3	FHL3 protein	FHL3	FHL3 protein	Contig1621	2.06458	9.49822	0.000208674	2.72641	7.62808	4.38e-17	1.36362	7.62808	3e-05
dd_Smed_v6_12523_0_1	AFMID	Kynurenine formamidase	afmid	Kynurenine formamidase	Contig4974	0.122561	7.37148	0.378397	2.73292	3.12847	3.98e-09	3.06636	3.12847	5.73e-11
dd_Smed_v6_1255_0_1	ATP6V1C1	V-type proton ATPase subunit C 1	atp6v1c1a	V-type proton ATPase subunit C 1-A	Contig313	1.83386	9.43891	8.57e-05	1.76378	7.82248	1.12e-09	1.63959	7.82248	1.85e-08
dd_Smed_v6_1261_0_1	FTMT	Ferritin, mitochondrial	wu:fj24c01	Ferritin	Contig1641	0.578235	8.96002	0.0115821	5.55835	7.63427	7.74e-67	5.37359	7.63427	1.88e-63
dd_Smed_v6_1266_0_1	NA	NA	pck	EG:80H7.2 protein	Contig3864	1.09926	9.575	0.000448466	1.32805	6.2991	1.2e-06	1.02776	6.2991	0.000248153
dd_Smed_v6_12729_0_1	NA	NA	NA	NA	Contig7304	0.0220811	6.01486	0.523795	5.56063	3.21014	1.86e-25	4.98409	3.21014	2.26e-21
dd_Smed_v6_12821_0_1	SEC14L4	SEC14-like protein 4	Sec14l2	SEC14-like protein 2	PL05003A1B05	0.707186	6.82015	0.0167254	5.53358	2.33496	2.15e-14	5.71592	2.33496	4.63e-15
dd_Smed_v6_12832_0_1	BEST3	Bestrophin-3	Best1	Bestrophin homolog	Contig1818	1.4612	7.59574	0.000518824	3.77148	3.34614	2.41e-15	3.90483	3.34614	3.49e-16
dd_Smed_v6_1286_0_1	MAP2K6	Dual specificity mitogen-activated protein kinase kinase 6	MAP2K6	Dual specificity mitogen-activated protein kinase kinase 6	Contig5250	0.653204	9.21758	0.00401029	1.63104	5.44632	1.48e-07	1.38472	5.44632	1.07e-05
dd_Smed_v6_12877_0_1	NA	NA	NA	NA	Contig6044	1.05807	7.03278	0.00546095	6.3682	2.69576	1.79e-14	6.66261	2.69576	2.17e-15
dd_Smed_v6_12893_0_1	FAM102A	Protein FAM102A	CG8671	CG8671, isoform B	Contig3509	1.12155	6.97962	0.00635961	3.45649	1.92209	6.32e-05	3.0819	1.92209	0.000388642
dd_Smed_v6_1294_0_1	NA	NA	NA	NA	Contig4582	0.915487	9.52315	0.000478294	1.8454	5.451	5.5e-10	1.52018	5.451	4.28e-07
dd_Smed_v6_1296_0_1	NA	NA	NA	NA	PL04006B2G08	0.889656	8.01214	0.0266751	1.80281	8.07426	1.02e-05	1.65739	8.07426	6.03e-05
dd_Smed_v6_1297_0_1	PEPD	Xaa-Pro dipeptidase	PEPD	Xaa-Pro dipeptidase	Contig244	0.976436	8.27983	0.000581297	1.54607	8.53	2.65e-06	1.32962	8.53	6.97e-05
dd_Smed_v6_1298_0_1	NA	NA	NA	NA	PL05002B1B07	1.39489	7.43196	0.00377557	3.94642	5.45659	1.56e-32	3.76259	5.45659	4.61e-30
dd_Smed_v6_12990_0_1	SLC8A1	Sodium/calcium exchanger 1	Slc8a1	Sodium/calcium exchanger 1	Contig4568	1.12438	7.43271	0.000157806	6.03549	3.27158	1.99e-18	5.50152	3.27158	5.24e-16
dd_Smed_v6_1300_0_1	NA	NA	NA	NA	Contig2978	0.940965	8.35929	0.000347243	1.18051	6.01722	0.000118556	1.11692	6.01722	0.00033328
dd_Smed_v6_1306_0_1	PLA2G15	Group XV phospholipase A2	PLA2G15	Group XV phospholipase A2	Contig6532	2.10067	8.65579	0.000603953	1.63783	6.52792	6.34e-08	1.30135	6.52792	2.35e-05
dd_Smed_v6_1308_0_1	TRAF2	TNF receptor-associated factor 2	Traf5	TNF receptor-associated factor 5	Contig4033	2.76581	8.99044	2.44e-05	5.46237	7.38743	6.59e-57	5.24167	7.38743	1.76e-53
dd_Smed_v6_131_0_1	NA	NA	NA	NA	Contig3323	-0.39298	10.6343	0.152587	7.36822	10.9637	3.92e-65	6.34993	10.9637	3.2e-53
dd_Smed_v6_1311_0_1	VAMP3	Vesicle-associated membrane protein 3	vamp3	Vesicle-associated membrane protein 3 (Cellubrevin)	Contig3395	2.1577	9.62302	6.8e-05	2.64042	5.09845	5.54e-13	2.58472	5.09845	1.86e-12
dd_Smed_v6_1322_0_1	MAPRE1	Microtubule-associated protein RP/EB family member 1	Mapre1	Microtubule-associated protein RP/EB family member 1	Contig2028	0.58268	8.42947	0.00227069	1.39987	7.12935	2.85e-05	1.20053	7.12935	0.000434258
dd_Smed_v6_1325_0_1	ZMYM1	Zinc finger MYM-type protein 1	ZMYM1	Zinc finger MYM-type protein 1	Contig6015	1.22045	8.02936	0.00361635	3.87985	5.6238	1.68e-25	4.03338	5.6238	4.2e-27
dd_Smed_v6_13270_0_1	RGR	RPE-retinal G protein-coupled receptor	RGR	RPE-retinal G protein-coupled receptor	PL05016A1E04	-0.107403	6.21041	0.478556	5.04358	1.47859	0.000383086	4.75948	1.47859	0.000846531
dd_Smed_v6_1328_0_1	NA	NA	NA	NA	Contig1505	2.57739	9.80464	3.43e-05	1.29284	8.02843	1.36e-05	1.31352	8.02843	1.12e-05
dd_Smed_v6_13292_0_1	NID2	Nidogen-2	tg	Thyroglobulin	Contig1612	-0.195867	6.26458	0.219987	0.411298	2.58267	0.624758	3.03246	2.58267	4.65e-06
dd_Smed_v6_1333_0_1	NA	NA	CG10527	Uncharacterized protein	Contig1106	3.54494	10.6598	2.65e-05	5.59033	4.68589	7.19e-14	5.60968	4.68589	7.12e-14
dd_Smed_v6_1334_0_1	BPNT1	3'(2'),5'-bisphosphate nucleotidase 1	BPNT1	3'(2'),5'-bisphosphate nucleotidase 1	Contig4084	1.07087	8.64174	0.000231671	2.25513	6.19294	4.39e-17	1.95038	6.19294	3.66e-13
dd_Smed_v6_1335_0_1	CHMP2A	Charged multivesicular body protein 2a	chmp2a	Charged multivesicular body protein 2a	Contig2278	1.0801	7.27253	0.000215767	1.27776	6.55855	7.71e-06	1.22497	6.55855	2.16e-05
dd_Smed_v6_1339_0_1	ALDH2	Aldehyde dehydrogenase, mitochondrial	Aldh2	Aldehyde dehydrogenase, mitochondrial	Contig2274	0.683624	8.50997	0.00117931	2.4886	7.2243	1.28e-12	2.39515	7.2243	9.42e-12
dd_Smed_v6_1346_0_1	HMBS	Porphobilinogen deaminase	HMBS	Porphobilinogen deaminase	Contig3214	0.304257	8.12282	0.23466	2.57382	6.24524	3.17e-18	2.50316	6.24524	2.59e-17
dd_Smed_v6_1347_0_1	NA	NA	NA	NA	Contig4599	-0.336516	6.79357	0.185018	6.37392	6.5285	3.27e-27	6.67666	6.5285	5.59e-29
dd_Smed_v6_1351_0_1	PRCP	Lysosomal Pro-X carboxypeptidase	Prcp	Lysosomal Pro-X carboxypeptidase	Contig1592	2.60844	10.2491	2.61e-05	2.96403	5.16942	1.41e-11	2.94715	5.16942	2.14e-11
dd_Smed_v6_1354_0_1	SNX3	Sorting nexin-3	Snx3	RE52028p	Contig7280	1.04545	8.14359	0.00774402	1.99378	6.90044	5.36e-11	1.9364	6.90044	2.19e-10
dd_Smed_v6_1358_0_1	COMMD5	COMM domain-containing protein 5	COMMD5	COMM domain-containing protein 5	Contig1531	1.15059	8.29897	0.000237502	1.26103	5.70303	0.000650155	1.05405	5.70303	0.00586429
dd_Smed_v6_1362_0_1	PRKAR2B	Protein kinase, cAMP-dependent, regulatory, type II, beta	Pka-R2	cAMP-dependent protein kinase type II regulatory subunit	Contig2024	2.48642	9.76396	7.46e-05	5.98963	6.96283	9.96e-68	5.96612	6.96283	5.18e-67
dd_Smed_v6_1364_0_1	UBQLN1	Ubiquilin-1	Ubqln1	Ubiquilin-1	Contig2009	0.769993	8.47731	0.00158332	1.49624	5.86421	1.3e-07	0.979543	5.86421	0.000870128
dd_Smed_v6_1365_0_1	M6PR	Cation-dependent mannose-6-phosphate receptor	M6PR	Cation-dependent mannose-6-phosphate receptor	Contig1301	2.127	9.74005	3.81e-05	1.94252	7.611	1.89e-11	1.8519	7.611	1.83e-10
dd_Smed_v6_1369_0_1	ATP6V1E1	ATPase, H+ transporting, lysosomal 31kDa, V1 subunit E isoform 1	atp6v1e1b	ATPase, H+-transporting, lysosomal, V1 subunit E1b	Contig208	1.84445	8.63963	0.000407098	2.27974	7.82395	6.34e-16	2.02564	7.82395	6.94e-13
dd_Smed_v6_13694_0_1	NA	NA	NA	NA	Contig1846	2.40312	7.68056	0.00057209	8.10665	3.03495	2.05e-23	7.66803	3.03495	1.81e-21
dd_Smed_v6_13709_0_1	NA	NA	NA	NA	PL06009B2A06	0.214233	6.76894	0.438016	7.21898	3.68028	1.72e-29	7.4522	3.68028	6.9e-31
dd_Smed_v6_1371_0_1	DSTYK	Dual serine/threonine and tyrosine protein kinase	Dstyk	Dual serine/threonine and tyrosine protein kinase	Contig5023	2.33855	9.39682	2.29e-05	2.72298	6.3565	1.04e-19	2.68061	6.3565	3.92e-19
dd_Smed_v6_1373_1_1	PDCD6IP	Programmed cell death 6-interacting protein	ALiX	ALG-2 interacting protein X	Contig4912	1.2147	9.01283	0.000390024	1.29385	6.07522	3e-05	1.18267	6.07522	0.000170025
dd_Smed_v6_13811_0_1	TRAF6	TNF receptor-associated factor 6	Traf6	TNF receptor-associated factor 6	PL08008A1G07	1.72056	7.43695	0.00164875	7.36062	2.48842	6.39e-20	7.16265	2.48842	4.63e-19
dd_Smed_v6_1388_0_1	NA	NA	NA	NA	Contig7504	1.66937	8.66799	0.000734947	2.33524	5.45361	1.72e-12	2.51404	5.45361	4.06e-14
dd_Smed_v6_1391_0_1	ATP6V1D	V-type proton ATPase subunit D	ATP6V1D	V-type proton ATPase subunit D	Contig5665	1.37	9.57585	0.000324066	1.64139	7.20724	8.42e-08	1.55381	7.20724	4.77e-07
dd_Smed_v6_1394_0_1	NA	NA	NA	NA	Contig277	0.491939	9.63279	0.0213951	4.65089	4.1669	1.36e-21	4.51481	4.1669	1.45e-20
dd_Smed_v6_1395_0_1	RNF34	E3 ubiquitin-protein ligase RNF34	RNF34	E3 ubiquitin-protein ligase RNF34	Contig4849	1.78567	8.93184	9.98e-05	1.74214	6.95139	4.24e-07	1.59229	6.95139	4.66e-06
dd_Smed_v6_14_0_1	NA	NA	NA	NA	Contig5797	-0.512071	11.8303	0.16027	3.47354	10.0373	1.14e-19	3.72594	10.0373	5.62e-22
dd_Smed_v6_1401_0_1	NA	NA	NA	NA	Contig3622	-0.804492	6.69882	0.08804	1.04932	6.20915	0.0150716	3.41223	6.20915	6.87e-16
dd_Smed_v6_14059_0_1	EIF4G1	Eukaryotic translation initiation factor 4 gamma 1	NAT1	NAT1, isoform D	Contig728	0.540474	5.86965	0.0142639	11.0815	2.78129	8.11e-31	10.973	2.78129	3.16e-30
dd_Smed_v6_1406_0_1	NA	NA	NA	NA	Contig2655	2.86466	9.18277	8.47e-05	7.46465	7.36268	3.91e-17	7.68245	7.36268	1.01e-17
dd_Smed_v6_1411_0_1	ACAA2	3-ketoacyl-CoA thiolase, mitochondrial	ACAA2	3-ketoacyl-CoA thiolase, mitochondrial	Contig6509	0.438903	8.9289	0.0841874	1.50127	5.63421	6.82e-06	1.38158	5.63421	4.25e-05
dd_Smed_v6_1412_0_1	CPA2	Carboxypeptidase A2	CPA2	Carboxypeptidase A2	Contig1711	-1.05514	8.06015	0.00396664	7.92317	8.31702	2.11e-44	4.34064	8.31702	9.9e-19
dd_Smed_v6_14195_0_1	NA	NA	NA	NA	Contig3521	1.45769	6.58338	0.000303563	4.61537	3.3733	7.81e-23	4.80678	3.3733	2.4e-24
dd_Smed_v6_1433_0_1	VAPA	Vesicle-associated membrane protein-associated protein A	VAPA	Vesicle-associated membrane protein-associated protein A	Contig5553	1.6786	9.40112	0.000181975	1.51856	7.7989	1.04e-07	1.47597	7.7989	2.81e-07
dd_Smed_v6_1439_0_1	TRAF6	TNF receptor-associated factor 6	TRAF6	TNF receptor-associated factor 6	Contig4173	0.469025	7.90418	0.0068361	1.23262	5.68994	5.03e-06	1.01266	5.68994	0.000245124
dd_Smed_v6_1444_0_1	WWP1	NEDD4-like E3 ubiquitin-protein ligase WWP1	Wwp1	NEDD4-like E3 ubiquitin-protein ligase WWP1	PL06005A1F12	0.416727	6.69075	0.0513693	1.25274	7.4326	3.91e-06	1.26498	7.4326	3.6e-06
dd_Smed_v6_1447_0_1	PIEZO2	Piezo-type mechanosensitive ion channel component 2	PIEZO2	Piezo-type mechanosensitive ion channel component 2	Contig4398	2.57139	8.90881	0.00170001	2.73551	7.40994	1.6e-25	2.61011	7.40994	1.78e-23
dd_Smed_v6_1450_0_1	RAP2C	Ras-related protein Rap-2c	RAP2C	Ras-related protein Rap-2c	Contig6592	0.860635	7.13239	0.00696968	1.62275	6.24124	3.16e-07	1.61944	6.24124	3.93e-07
dd_Smed_v6_1451_0_1	NA	NA	NA	NA	Contig1785	2.20389	11.2812	3.86e-05	1.76544	7.13441	2.12e-09	1.54902	7.13441	1.92e-07
dd_Smed_v6_1452_0_1	ATP6V1H	V-type proton ATPase subunit H	atp6v1h	ATPase, H+ transporting, lysosomal, V1 subunit H	Contig5284	1.93985	9.96259	4.98e-05	2.4074	5.71563	1.78e-14	2.19096	5.71563	3.14e-12
dd_Smed_v6_1453_0_1	ABHD4	Protein ABHD4	ABHD4	Protein ABHD4	PL05003B2G09	0.257913	7.13679	0.297047	1.01454	5.75976	0.00170753	1.17291	5.75976	0.000273031
dd_Smed_v6_14544_0_1	NA	NA	CELE_Y59A8B.21	Uncharacterized protein	Contig2179	0.350899	6.0424	0.0871746	2.86878	3.19294	1.04e-09	2.57433	3.19294	4.58e-08
dd_Smed_v6_1455_0_1	ZNF346	Zinc finger protein 346	Zn72D	GH12756p	Contig2355	0.390829	7.51017	0.0335063	3.48039	6.28035	2.97e-19	3.1897	6.28035	1.24e-16
dd_Smed_v6_1458_0_1	ACADL	Long-chain specific acyl-CoA dehydrogenase, mitochondrial	Acadl	Long-chain specific acyl-CoA dehydrogenase, mitochondrial	Contig4612	0.25668	9.15232	0.276233	1.12009	7.32758	0.000160483	0.930147	7.32758	0.00239052
dd_Smed_v6_1462_0_1	SGTB	Small glutamine-rich tetratricopeptide repeat-containing protein beta	Sgtb	Small glutamine-rich tetratricopeptide repeat-containing protein beta	Contig3761	0.525481	7.94758	0.00515858	1.14594	6.9478	7.06e-05	1.11874	6.9478	0.00012291
dd_Smed_v6_1463_0_1	PICALM	Phosphatidylinositol-binding clathrin assembly protein	lap	Phosphatidylinositol-binding clathrin assembly protein LAP	Contig1792	1.40497	7.98542	0.000107799	1.60542	6.758	1.96e-07	1.53021	6.758	8.61e-07
dd_Smed_v6_1467_0_1	EFHD1	EF-hand domain-containing protein D1	EFHD1	EF-hand domain-containing protein D1	Contig658	2.38586	9.30142	8.55e-05	2.05707	8.23348	7.42e-14	1.8851	8.23348	8.14e-12
dd_Smed_v6_1471_0_1	NA	NA	NA	NA	Contig68	0.539234	8.52406	0.0367917	4.8499	8.17985	2.91e-40	4.82833	8.17985	5.69e-40
dd_Smed_v6_14777_0_1	POTEKP	Putative beta-actin-like protein 3	POTEKP	Putative beta-actin-like protein 3	Contig7394	0.0560257	5.66643	0.635726	1.35905	4.6855	3.44e-05	1.3546	4.6855	4.2e-05
dd_Smed_v6_1480_0_1	APMAP	Adipocyte plasma membrane-associated protein	apmap	Adipocyte plasma membrane-associated protein	Contig1622	1.00754	8.07947	0.000963981	3.30337	6.45046	7.42e-28	3.48486	6.45046	2.07e-30
dd_Smed_v6_14816_0_1	SPRED1	Sprouty-related, EVH1 domain-containing protein 1	spred1	Sprouty-related, EVH1 domain-containing 1	PL04018B2A07	-0.0281558	6.41751	0.782053	3.82128	1.48339	7.48e-05	4.46865	1.48339	5.82e-06
dd_Smed_v6_14832_0_1	TSTD1	Thiosulfate sulfurtransferase/rhodanese-like domain-containing protein 1	Tstd1	Thiosulfate sulfurtransferase (rhodanese)-like domain-containing 1	Contig6763	0.470862	6.58728	0.0134133	2.01223	1.82305	0.00911038	0.660291	1.82305	0.502658
dd_Smed_v6_1491_0_1	NA	NA	NA	NA	Contig610	-0.649258	7.86845	0.0210828	6.69773	7.67535	2.96e-55	6.29067	7.67535	1.39e-50
dd_Smed_v6_1493_0_1	ALDH7A1	Alpha-aminoadipic semialdehyde dehydrogenase	aldh7a1	Aldehyde dehydrogenase 7 family, member A1	Contig2695	0.575493	7.8986	0.00798357	1.57752	7.09794	6e-08	1.26561	7.09794	1.9e-05
dd_Smed_v6_1494_0_1	ATP6V1E1	ATPase, H+ transporting, lysosomal 31kDa, V1 subunit E isoform 1	Vha26	V-type proton ATPase subunit E	Contig317	2.00837	9.39416	0.000365107	1.95435	7.91442	1.93e-12	1.74449	7.91442	3.97e-10
dd_Smed_v6_1504_0_1	CHP1	Calcineurin B homologous protein 1	CHP1	Calcineurin B homologous protein 1	Contig3171	0.7926	8.81661	0.000854917	1.68839	6.36067	1.98e-09	1.67706	6.36067	3.03e-09
dd_Smed_v6_15049_0_1	TRAF6	TNF receptor-associated factor 6	NA	NA	PL06019B2F05	0.122337	6.32002	0.483433	8.18391	0.963561	7.15e-10	7.31339	0.963561	2.71e-08
dd_Smed_v6_1505_0_1	TGFBI	Transforming growth factor-beta-induced protein ig-h3	postnb	Periostin, osteoblast specific factor	Contig1042	1.06299	9.56605	0.000359012	6.16897	9.45284	1.37e-63	5.94473	9.45284	3.19e-60
dd_Smed_v6_1513_0_1	SLC31A1	High affinity copper uptake protein 1	slc31a1	Solute carrier family 31 (copper transporter), member 1	Contig1777	1.75612	9.69377	7.55e-05	3.21921	4.49224	5.8e-06	3.41078	4.49224	2.01e-06
dd_Smed_v6_1514_0_1	CHMP2B	Charged multivesicular body protein 2b	CHMP2B	Charged multivesicular body protein 2b	Contig2325	2.17208	8.99775	2.73e-05	2.22208	6.76187	1.07e-16	2.11302	6.76187	3.16e-15
dd_Smed_v6_1517_0_1	GSTM4	Glutathione S-transferase Mu 4	Gstm4	Glutathione S-transferase mu 4	Contig1944	0.528224	9.40035	0.0051287	1.77989	6.39848	1.7e-08	1.6552	6.39848	1.93e-07
dd_Smed_v6_1518_0_1	CLSTN1	Calsyntenin-1	clstn1	Calsyntenin 1	Contig3071	1.01607	8.27174	0.000610396	1.13942	6.35755	9.89e-05	0.983522	6.35755	0.00104103
dd_Smed_v6_1519_0_1	HEL-S-5	Aminoacylase 1	Acy1	Aminoacylase-1	Contig6335	-0.720972	7.23456	0.306556	1.05691	6.26247	9.66e-05	1.28251	6.26247	2e-06
dd_Smed_v6_15204_0_1	HSPA8	HSPA8 protein	HSPA8	HSPA8 protein	Contig4015	0.208125	5.76122	0.215009	5.54297	1.42032	0.000245927	5.81283	1.42032	0.000157368
dd_Smed_v6_1522_0_1	SH3KBP1	SH3 domain-containing kinase-binding protein 1	sh3kbp1	SH3-domain kinase-binding protein 1	PL06002X1B06	0.528755	8.08218	0.0706801	2.74997	7.61024	1.63e-22	2.56618	7.61024	6.55e-20
dd_Smed_v6_1523_0_1	PGLYRP3	Peptidoglycan recognition protein 3	PGRP-LB	Peptidoglycan-recognition protein LB	Contig6433	0.377045	9.07687	0.0949275	3.56807	7.1824	1.41e-31	2.34429	7.1824	2.23e-15
dd_Smed_v6_1531_0_1	NA	NA	NA	NA	PL04010A1F12	-0.346399	8.40236	0.232036	1.51784	3.8737	0.00622659	0.741431	3.8737	0.249798
dd_Smed_v6_15390_0_1	NA	NA	NA	NA	Contig7706	0.577895	6.099	0.0158173	4.08717	3.69978	1.18e-17	4.05306	3.69978	2.25e-17
dd_Smed_v6_154_0_1	PLIN5	Perilipin-5	Plin5	Perilipin-5	Contig1083	3.04998	11.7446	0.000108486	3.36044	9.9159	1.99e-22	3.18643	9.9159	1.79e-20
dd_Smed_v6_1542_0_1	NA	NA	Tmem45b	Transmembrane protein 45B	Contig3692	0.940056	9.26636	0.000443366	2.42879	4.34361	1.64e-11	2.12255	4.34361	4.41e-09
dd_Smed_v6_1544_0_1	SCAMP1	Secretory carrier-associated membrane protein 1	SCAMP1	Secretory carrier-associated membrane protein 1	Contig951	2.48172	9.05607	2.53e-05	3.14956	7.34655	1.23e-24	3.10972	7.34655	4.45e-24
dd_Smed_v6_1553_0_1	NA	NA	NA	NA	Contig213	2.32055	9.50172	9.67e-05	7.15508	5.56194	2.8e-16	7.49062	5.56194	3.09e-17
dd_Smed_v6_1558_0_1	NA	NA	NA	NA	Contig67	0.583426	8.73333	0.00829222	1.35391	6.5263	0.00138628	1.27575	6.5263	0.00314623
dd_Smed_v6_1559_0_1	BCAP31	B-cell receptor-associated protein 31	bcap29	B-cell receptor-associated protein 29	Contig1500	1.1055	8.04686	0.000233891	1.61032	6.33668	4.86e-09	1.51948	6.33668	4.2e-08
dd_Smed_v6_1562_0_1	TMX1	Thioredoxin-related transmembrane protein 1	tmx1	Thioredoxin-related transmembrane protein 1	Contig1419	0.870078	9.13249	0.00050225	1.81607	5.33816	4.34e-06	1.49077	5.33816	0.00020741
dd_Smed_v6_1563_0_1	CLINT1	Clathrin interactor 1	clint1a	Enthoprotin	Contig6480	1.31563	8.57048	0.00903285	3.12719	3.98536	1.54e-07	2.74576	3.98536	4.15e-06
dd_Smed_v6_1565_0_1	LIPF	Gastric triacylglycerol lipase	lipf	Lipase	Contig6356	3.5441	10.5223	0.000888513	5.70547	7.51278	7.21e-72	5.60437	7.51278	9.44e-70
dd_Smed_v6_1584_0_1	UPB1	Beta-ureidopropionase	UPB1	Beta-ureidopropionase	Contig2599	2.4153	10.1199	6e-05	3.35832	5.13439	5.79e-20	2.88165	5.13439	2.15e-15
dd_Smed_v6_1585_0_1	CBS	Cystathionine beta-synthase	CBS	Cystathionine beta-synthase	Contig1264	1.53947	9.98987	0.000123728	2.42991	7.14177	1.03e-17	2.43456	7.14177	1.02e-17
dd_Smed_v6_1587_0_1	NA	NA	NA	NA	Contig1222	2.39991	9.36544	2.61e-05	5.18926	6.95123	8.59e-63	5.10603	6.95123	4.03e-61
dd_Smed_v6_1589_0_1	ATP6V1F	V-type proton ATPase subunit F	atp6v1f	V-type proton ATPase subunit F	Contig6464	1.67049	9.08835	0.00233211	2.04661	6.82039	4.87e-14	1.8089	6.82039	3.11e-11
dd_Smed_v6_1593_1_1	HADHB	Trifunctional enzyme subunit beta, mitochondrial	B0303.3	Uncharacterized protein B0303.3	Contig7558	-0.24918	8.72863	0.283567	1.39841	6.58489	2.93e-07	1.08249	6.58489	0.000104086
dd_Smed_v6_1595_0_1	NA	NA	NA	NA	Contig6667	1.93291	8.49089	0.00226036	5.9596	7.67422	1.34e-66	5.74473	7.67422	5.11e-63
dd_Smed_v6_1599_0_1	CORO1B	Coronin-1B	coro	Coronin	Contig6501	1.06241	8.36798	0.00187012	1.0964	7.22	0.000141836	0.965079	7.22	0.00106619
dd_Smed_v6_160_0_1	DBI	Acyl-CoA-binding protein	DBI	Acyl-CoA-binding protein	Contig391	1.31983	10.8415	0.000187331	1.9198	9.93605	1.32e-08	1.79804	9.93605	1.24e-07
dd_Smed_v6_162_0_1	GRN	Granulins	Grn	Granulins	PL06004A1G01	3.10631	11.3787	0.000640308	2.50558	1.8717	0.00506394	2.63925	1.8717	0.00349623
dd_Smed_v6_1621_0_1	ALDH8A1	Aldehyde dehydrogenase family 8 member A1	ALDH8A1	Aldehyde dehydrogenase family 8 member A1	PL06013B2E03	1.38227	7.55138	0.00440355	7.43451	6.31265	6.03e-27	7.60306	6.31265	1.02e-27
dd_Smed_v6_1622_0_1	ATP6V0B	V-type proton ATPase 21 kDa proteolipid subunit	Atp6v0b	V-type proton ATPase 21 kDa proteolipid subunit	Contig133	2.02982	10.5283	2.34e-05	2.17098	8.83269	1.22e-14	1.93739	8.83269	6.33e-12
dd_Smed_v6_1625_0_1	LIMA1	LIM domain and actin-binding protein 1	Lima1	LIM domain and actin-binding protein 1	Contig4720	0.698619	6.84001	0.0635698	1.12499	6.19551	0.000425281	1.13769	6.19551	0.000416389
dd_Smed_v6_1626_0_1	MYO1E	Unconventional myosin-Ie	myo1eb	Zgc:64042	Contig59	0.644912	6.4948	0.00358708	1.18678	6.50225	6.25e-06	1.15468	6.50225	1.31e-05
dd_Smed_v6_16290_0_1	-	P2X purinoceptor	p2rx1	P2X purinoceptor	Contig4638	-0.149386	6.38338	0.479435	3.5011	1.15528	0.00151701	4.02698	1.15528	0.00033636
dd_Smed_v6_1630_0_1	STK24	Serine/threonine-protein kinase 24	map3k19	Mitogen-activated protein kinase kinase kinase 19	Contig353	1.34155	8.86765	0.000213801	1.91618	8.44571	3.09e-10	1.80393	8.44571	3.73e-09
dd_Smed_v6_1633_0_1	SPTLC2	Serine palmitoyltransferase 2	Sptlc2	Serine palmitoyltransferase 2	Contig3749	1.51285	10.0769	6.48e-05	1.53559	6.63802	6e-07	1.3599	6.63802	1.26e-05
dd_Smed_v6_1643_0_1	DNASE2	Deoxyribonuclease-2-alpha	crn-7	Cell-death-related nuclease 7	Contig4893	1.79594	8.15059	0.0103185	2.53943	4.62243	1.81e-08	2.51469	4.62243	2.89e-08
dd_Smed_v6_1644_0_1	GALNT10	Polypeptide N-acetylgalactosaminyltransferase 10	gly-10	Putative polypeptide N-acetylgalactosaminyltransferase 10	Contig4834	0.491385	7.30289	0.00743978	1.56949	5.84375	2.45e-08	1.1023	5.84375	0.000135784
dd_Smed_v6_1645_0_1	CHMP1A	Charged multivesicular body protein 1a	CHMP1A	Charged multivesicular body protein 1a	Contig5740	1.49763	9.23796	0.00290899	1.20979	6.97335	4.95e-06	1.17173	6.97335	1.16e-05
dd_Smed_v6_1649_0_1	SATL1	Spermidine/spermine N(1)-acetyltransferase-like protein 1	Qrich2	Glutamine-rich 2	Contig1663	1.37513	9.68838	8.56e-05	2.04044	7.11405	5.41e-14	1.82547	7.11405	1.94e-11
dd_Smed_v6_1655_0_1	UROC1	Urocanate hydratase	uroc1	Urocanate hydratase 1	Contig1949	0.318471	8.22037	0.066789	5.07174	7.76772	4.55e-48	4.93504	7.76772	4.52e-46
dd_Smed_v6_1659_0_1	NA	NA	NA	NA	Contig6284	0.96761	8.28652	0.0052685	1.62374	6.14527	2.33e-08	1.46423	6.14527	6.04e-07
dd_Smed_v6_1670_0_1	NDE1	Nuclear distribution protein nudE homolog 1	Nde1	Nuclear distribution protein nudE homolog 1	Contig5433	0.475813	8.25468	0.0121281	0.923287	4.89884	0.00589392	1.13102	4.89884	0.000634544
dd_Smed_v6_1680_0_1	ALDH3B1	Aldehyde dehydrogenase family 3 member B1	aldh3b1	Aldehyde dehydrogenase	Contig7659	0.47736	8.67627	0.144931	1.17218	7.5351	2.02e-05	1.00997	7.5351	0.000319776
dd_Smed_v6_1694_0_1	HNF4G	Hepatocyte nuclear factor 4-gamma	hnf4a	Hepatocyte nuclear factor 4 alpha	Contig5288	0.848041	7.56078	0.000552714	2.09332	6.87078	2.66e-16	1.69013	6.87078	4.27e-11
dd_Smed_v6_17_0_1	NA	NA	cib	Ciboulot, isoform A	Contig2023	3.5	12.5267	2.7e-05	3.19611	10.9948	6.99e-22	3.27604	10.9948	9.5e-23
dd_Smed_v6_1701_0_1	SNF8	Vacuolar-sorting protein SNF8	SNF8	Vacuolar-sorting protein SNF8	Contig1765	1.22836	9.40036	8.49e-05	1.10607	5.85353	0.000230034	1.06401	5.85353	0.000474531
dd_Smed_v6_1705_0_1	NA	NA	NA	NA	Contig82	0.846889	7.7636	0.00245213	2.03207	6.84357	2.06e-12	2.03749	6.84357	2.16e-12
dd_Smed_v6_1709_0_1	FBP1	Fructose-1,6-bisphosphatase 1	fbp1a	Fructose-1,6-bisphosphatase 1a	Contig2420	-0.469639	9.58457	0.00730408	1.21723	6.66613	3.23e-05	1.42681	6.66613	1.06e-06
dd_Smed_v6_1714_0_1	EVL	Ena/VASP-like protein	enah	Enabled homolog (Drosophila)	Contig6116	1.39792	8.65343	0.00121753	2.04588	4.73129	1.94e-11	1.86987	4.73129	1.04e-09
dd_Smed_v6_1726_0_1	ASAH2	Neutral ceramidase	CDase	Neutral ceramidase	Contig2188	0.671064	8.93012	0.00926523	3.03856	7.74731	3.7e-27	2.24785	7.74731	4.87e-16
dd_Smed_v6_1727_0_1	VPS29	Vacuolar protein sorting-associated protein 29	vps29	Vacuolar protein sorting-associated protein 29	Contig2859	1.62136	9.92688	0.000126609	2.0468	6.36473	4.61e-11	1.79155	6.36473	9.98e-09
dd_Smed_v6_1731_0_1	SLC39A14	Zinc transporter ZIP14	Slc39a14	Zinc transporter ZIP14	Contig5021	-1.31367	8.32238	0.000421317	0.405168	4.78723	0.263265	1.14146	4.78723	0.000266493
dd_Smed_v6_1734_0_1	HEL-S-8a	Epididymis secretory sperm binding protein Li 8a	HEL-S-8a	Epididymis secretory sperm binding protein Li 8a	Contig2936	-0.283713	8.15212	0.103633	1.2823	6.54893	4.23e-06	1.12667	6.54893	6.91e-05
dd_Smed_v6_1736_0_1	NA	NA	Faxc	Failed axon connections homolog	Contig5171	2.39713	8.41727	7.82e-05	2.77001	5.88877	1.67e-18	2.52303	5.88877	1.07e-15
dd_Smed_v6_1738_0_1	SLC12A9	Solute carrier family 12 member 9	Slc12a9	Solute carrier family 12 member 9	Contig5531	1.92185	8.89198	4.13e-05	3.56662	4.98094	5.09e-11	3.2654	4.98094	1.61e-09
dd_Smed_v6_1739_0_1	HEL-S-52	Epididymis secretory protein Li 52	flr	Actin-interacting protein 1	PL06014B1C07	0.162454	7.39673	0.344861	1.0186	6.53308	0.000923822	0.671539	6.53308	0.0435271
dd_Smed_v6_1743_0_1	HACD2	Very-long-chain (3R)-3-hydroxyacyl-CoA dehydratase 2	HACD2	Very-long-chain (3R)-3-hydroxyacyl-CoA dehydratase 2	Contig2821	0.695915	9.46702	0.00127581	1.656	7.06877	1.38e-08	1.45337	7.06877	8.24e-07
dd_Smed_v6_1754_0_1	NA	NA	NA	NA	Contig3907	0.512101	7.07404	0.0119413	5.48041	6.19328	7.27e-50	5.45805	6.19328	1.61e-49
dd_Smed_v6_1757_0_1	NA	NA	NA	NA	Contig2156	1.56517	8.87441	0.000570511	2.27686	7.88356	1.03e-13	2.08467	7.88356	1.06e-11
dd_Smed_v6_1758_0_1	L2HGDH	L-2-hydroxyglutarate dehydrogenase, mitochondrial	L2HGDH	L-2-hydroxyglutarate dehydrogenase, mitochondrial	Contig5679	1.2367	9.16336	0.000154762	1.4064	7.4649	5.34e-07	1.36028	7.4649	1.5e-06
dd_Smed_v6_1762_0_1	CHMP6	Charged multivesicular body protein 6	Chmp6	Charged multivesicular body protein 6	Contig3012	1.35243	8.86986	0.000921643	1.62839	5.02926	3.16e-07	1.19403	5.02926	0.000257119
dd_Smed_v6_1767_0_1	BAK1	Bcl-2 homologous antagonist/killer	Bak1	Bcl-2 homologous antagonist/killer	Contig2592	0.392408	9.21272	0.0155099	1.00541	7.85183	0.00120302	0.91969	7.85183	0.00386847
dd_Smed_v6_1769_0_1	NA	NA	aspdh	Putative L-aspartate dehydrogenase	Contig2007	2.10244	9.35412	8.31e-05	3.51962	8.02072	4.2e-33	3.4667	8.02072	3.09e-32
dd_Smed_v6_1773_0_1	GNAI1	Guanine nucleotide-binding protein G(i) subunit alpha-1	GNAI1	Guanine nucleotide-binding protein G(i) subunit alpha-1	Contig3229	1.64458	7.78283	0.000126609	3.43255	5.24036	1.52e-15	3.42432	5.24036	2e-15
dd_Smed_v6_1776_0_1	ATPIF1	ATPase inhibitor, mitochondrial	ATPIF1	ATPase inhibitor, mitochondrial	Contig1218	0.116957	7.44502	0.503204	1.26991	5.46382	0.000604025	1.26089	5.46382	0.000763939
dd_Smed_v6_1784_0_1	ILVBL	Acetolactate synthase-like protein	ilvbl	Acetolactate synthase-like protein	Contig6067	0.336625	6.81424	0.0573493	0.921696	6.19001	0.00200906	1.00638	6.19001	0.000763939
dd_Smed_v6_1785_0_1	NA	NA	NA	NA	Contig1571	1.94278	9.98928	0.000495373	1.17676	6.6703	0.000717718	1.56997	6.6703	5.16e-06
dd_Smed_v6_1794_0_1	COMTD1	Catechol O-methyltransferase domain-containing protein 1	COMTD1	Catechol O-methyltransferase domain-containing protein 1	Contig1726	0.813691	8.80882	0.00178807	1.46856	6.8327	1.16e-05	1.16487	6.8327	0.00069378
dd_Smed_v6_1796_0_1	RTN1	Reticulon-1	rtn1a	Reticulon	Contig258	1.70575	9.2833	0.000121334	1.14702	8.04303	6.76e-05	1.11302	8.04303	0.00013086
dd_Smed_v6_1798_0_1	SYP	Synaptophysin	sypl2a	Synaptophysin-like 2a	Contig22	2.71411	10.2559	2.65e-05	2.80997	6.46546	4.67e-21	2.91	6.46546	2.61e-22
dd_Smed_v6_180_0_1	UBE2L3	Ubiquitin-conjugating enzyme E2 L3	ube2l3a	Ubiquitin-conjugating enzyme E2L 3a	Contig7160	-0.0896901	7.20804	0.557593	1.24062	9.93477	0.00038023	1.03984	9.93477	0.00391252
dd_Smed_v6_1802_0_1	RBCK1	RanBP-type and C3HC4-type zinc finger-containing protein 1	rbck1	RanBP-type and C3HC4-type zinc finger-containing protein 1	PL06018A1C05	0.45508	6.61125	0.0375203	1.15546	6.264	2.65e-05	0.957175	6.264	0.000687416
dd_Smed_v6_1808_0_1	NA	NA	Tsp74F	Tetraspanin	Contig1063	0.887169	9.0115	0.000872092	1.24926	6.82111	5.09e-06	0.958062	6.82111	0.000681331
dd_Smed_v6_182_0_1	NA	NA	NA	NA	Contig7102	0.0837135	6.21428	0.509055	6.93788	9.75917	3.62e-68	6.15583	9.75917	7.11e-58
dd_Smed_v6_1823_0_1	SLC25A20	Mitochondrial carnitine/acylcarnitine carrier protein	slc25a20	Solute carrier family 25 (Carnitine/acylcarnitine translocase), member 20	Contig3880	0.484189	7.73307	0.00416941	2.29084	6.37716	1.84e-14	1.87529	6.37716	3.83e-10
dd_Smed_v6_1825_0_1	LACTB2	Endoribonuclease LACTB2	Mblac1	Metallo-beta-lactamase domain-containing protein 1	Contig3980	0.0592797	8.47748	0.489854	2.91551	1.79081	0.00120349	3.78145	1.79081	3.75e-05
dd_Smed_v6_1827_0_1	NPTN	Neuroplastin	NPTN	Neuroplastin	Contig1035	0.531244	9.04511	0.0120004	0.901441	6.078	0.00141583	1.08421	6.078	0.000109266
dd_Smed_v6_1829_0_1	NA	NA	Mfsd1	Major facilitator superfamily domain-containing protein 1	Contig2643	2.2229	9.92231	0.000406185	2.72559	5.41595	2.96e-15	2.61029	5.41595	4.06e-14
dd_Smed_v6_1830_0_1	PARD6B	Partitioning defective 6 homolog beta	par-6	LD29223p	Contig3688	0.804207	9.00294	0.000826022	1.33285	4.26009	0.00325197	1.35116	4.26009	0.00321611
dd_Smed_v6_1835_0_1	BRK1	Protein BRICK1	Brk1	Protein BRICK1	Contig1637	1.00399	8.5067	0.000817823	1.35413	5.06478	0.000131377	1.29077	5.06478	0.000323819
dd_Smed_v6_1836_0_1	ATP6V1G2	V-type proton ATPase subunit G 2	ATP6V1G2	V-type proton ATPase subunit G 2	Contig1130	2.03422	9.32733	0.000132083	1.33569	6.461	3.22e-07	1.32308	6.461	4.92e-07
dd_Smed_v6_184_0_1	NA	NA	NA	NA	Contig3562	3.33768	9.87486	5.55e-05	2.55374	10.6321	2.1e-11	2.50275	10.6321	5.98e-11
dd_Smed_v6_1840_0_1	ATP6AP1	V-type proton ATPase subunit S1	atp6ap1b	ATPase, H+ transporting, lysosomal accessory protein 1	PL030008A20F11	2.09728	10.0192	0.00112173	2.45673	7.13741	4.51e-15	2.35529	7.13741	5.92e-14
dd_Smed_v6_185_0_1	NA	NA	NA	NA	Contig2228	-0.840204	11.1447	0.00947725	6.67766	11.6975	7.65e-65	5.95614	11.6975	2.79e-55
dd_Smed_v6_1850_0_1	NA	NA	NA	NA	Contig7543	1.07748	8.3883	0.000989852	1.54031	3.84861	7.48e-06	1.42382	3.84861	4.23e-05
dd_Smed_v6_1856_0_1	FAM49B	Protein FAM49B	fam49a	Family with sequence similarity 49, member A	Contig2300	1.77252	8.73973	0.000133894	1.88651	5.57046	3.67e-10	1.70505	5.57046	1.83e-08
dd_Smed_v6_1858_0_1	MTHFD1	C-1-tetrahydrofolate synthase, cytoplasmic	MTHFD1	C-1-tetrahydrofolate synthase, cytoplasmic	Contig950	0.147435	6.68702	0.354018	1.03957	6.73595	0.00024464	1.26971	6.73595	6.62e-06
dd_Smed_v6_1865_0_1	C10orf11	Leucine-rich repeat-containing protein C10orf11	c13h10orf11	C10orf11 homolog (H. sapiens)	PL030013A10D05	1.91462	8.31943	0.000956733	2.15895	5.53055	1.11e-14	2.27878	5.53055	4.34e-16
dd_Smed_v6_1874_0_1	SLC17A5	Sialin	slc17a5	Solute carrier family 17 (acidic sugar transporter), member 5	Contig3687	2.54003	9.13616	2.44e-05	2.87412	5.38259	4.49e-10	3.12575	5.38259	1.83e-11
dd_Smed_v6_1884_1_1	HGSNAT	Heparan-alpha-glucosaminide N-acetyltransferase	hgsnat	Heparan-alpha-glucosaminide N-acetyltransferase	PL030004A20F10	0.785888	7.61397	0.00918821	2.14584	4.79031	7.12e-11	2.07553	4.79031	3.34e-10
dd_Smed_v6_1889_0_1	ETFA	Electron transfer flavoprotein subunit alpha, mitochondrial	etfa	Electron-transfer-flavoprotein, alpha polypeptide	Contig5577	0.542793	8.1613	0.00970674	1.10958	6.77019	6.71e-05	0.902947	6.77019	0.00165664
dd_Smed_v6_1890_0_1	NA	NA	crim	Crimpled	Contig141	0.8059	9.29743	0.0041879	1.60149	4.29724	0.00483004	1.70197	4.29724	0.00296943
dd_Smed_v6_1894_0_1	PLD3	Phospholipase D3	PLD3	Phospholipase D3	Contig2603	1.75891	8.71238	4.77e-05	2.0731	5.22702	5.54e-08	2.26019	5.22702	3.71e-09
dd_Smed_v6_1895_0_1	RIDA	2-iminobutanoate/2-iminopropanoate deaminase	RIDA	2-iminobutanoate/2-iminopropanoate deaminase	Contig6937	0.47331	9.02701	0.318421	2.23712	7.04535	3.53e-15	2.19084	7.04535	1.42e-14
dd_Smed_v6_1896_0_1	OAT	Ornithine aminotransferase, mitochondrial	Oat	Ornithine aminotransferase, mitochondrial	PL06023B2C07	-0.493501	7.75464	0.269361	1.80716	6.34362	9.21e-11	1.83372	6.34362	5.75e-11
dd_Smed_v6_1897_0_1	NEK4	Serine/threonine-protein kinase Nek4	NEK4	Serine/threonine-protein kinase Nek4	Contig5760	0.861977	7.98277	0.00549419	1.04736	6.32684	9.79e-05	1.05889	6.32684	9.35e-05
dd_Smed_v6_19_0_1	NA	NA	NA	NA	Contig663	-0.168188	8.46277	0.544336	5.30275	10.4661	1.35e-19	4.90716	10.4661	1.9e-17
dd_Smed_v6_190_0_1	EPPIN	Eppin	Spint3	Putative uncharacterized protein	Contig7379	-1.31677	9.3093	0.00607657	5.66106	9.1152	1.74e-48	6.70298	9.1152	2.85e-61
dd_Smed_v6_1904_0_1	SLC37A3	Sugar phosphate exchanger 3	Slc37a3	Sugar phosphate exchanger 3	Contig5470	1.41132	8.6412	5.77e-05	2.436	5.5612	1.48e-13	2.11178	5.5612	1.53e-10
dd_Smed_v6_1915_0_1	ATG3	Ubiquitin-like-conjugating enzyme ATG3	atg3	Ubiquitin-like-conjugating enzyme ATG3	Contig4580	1.35947	8.09951	0.000232768	1.99786	7.06596	4.49e-10	1.688	7.06596	1.7e-07
dd_Smed_v6_1916_0_1	CHL1	Neural cell adhesion molecule L1-like protein	Nrg	Neuroglian	PL08005B1E08	0.64429	7.90941	0.00685018	1.03801	5.94715	0.000248305	0.635588	5.94715	0.0392637
dd_Smed_v6_1923_0_1	SMAD4	Mothers against decapentaplegic homolog	Med	Mothers against decapentaplegic homolog	Contig6291	1.15914	8.66419	0.00147094	1.09221	5.45731	0.000173674	1.0327	5.45731	0.000471955
dd_Smed_v6_1924_1_1	OSTM1	Osteopetrosis-associated transmembrane protein 1	OSTM1	Osteopetrosis-associated transmembrane protein 1	Contig2851	1.94576	8.90633	3.12e-05	2.04601	5.01022	8.61e-11	1.78641	5.01022	1.79e-08
dd_Smed_v6_1926_0_1	PRSS12	Neurotrypsin	teq	GRAAL protein	PL08010A1D03	0.0692112	8.06437	0.710717	5.45844	7.71256	2.12e-68	5.23192	7.71256	3.63e-64
dd_Smed_v6_1934_0_1	NEURL1B	E3 ubiquitin-protein ligase NEURL1B	neur	Protein neuralized	Contig5498	0.821539	7.65021	0.00184667	1.24574	5.69896	4.48e-06	1.05058	5.69896	0.000146707
dd_Smed_v6_1937_0_1	TOLLIP	Toll-interacting protein	tollip	Toll-interacting protein	Contig340	0.840758	9.03341	0.00151087	1.12123	5.71334	0.000111178	1.04816	5.71334	0.000376532
dd_Smed_v6_1938_0_1	NA	NA	NA	NA	Contig680	0.70564	9.29116	0.0740011	1.43447	6.71672	0.00063459	1.2835	6.71672	0.00283807
dd_Smed_v6_1939_0_1	GCSH	Glycine cleavage system H protein	si:ch211-141o9.10	Si:ch211-141o9.10	Contig1229	0.314955	8.44984	0.0611545	1.23857	5.3734	0.00262017	1.17063	5.3734	0.00538437
dd_Smed_v6_194_0_1	MUC2	Mucin-2	Apoltp	Apolipoprotein lipid transfer particle	PL06019B1E01	2.28488	8.06221	0.000625496	6.17213	10.9109	6.48e-58	6.10603	10.9109	5.54e-57
dd_Smed_v6_1942_0_1	MAN2B1	Lysosomal alpha-mannosidase	man2b1	Alpha-mannosidase	Contig5520	0.908077	6.72437	0.0295122	2.56637	5.7054	3.77e-15	2.60666	5.7054	1.68e-15
dd_Smed_v6_1961_0_1	ARCN1	Coatomer subunit delta	ARCN1	Coatomer subunit delta	Contig3529	0.124525	8.4319	0.444415	1.17867	4.58321	0.00467883	1.04845	4.58321	0.0148833
dd_Smed_v6_1976_0_1	ATP6V0D1	V-type proton ATPase subunit d 1	VhaAC39-1	V-type proton ATPase subunit d 1	Contig5406	2.00978	9.23157	0.000502705	1.73171	8.11194	9.14e-09	1.61322	8.11194	1.08e-07
dd_Smed_v6_1977_0_1	ELOVL4	Elongation of very long chain fatty acids protein 4	elovl7a	Elongation of very long chain fatty acids protein 7	Contig2891	0.646801	8.61303	0.00239524	2.03168	5.26728	3.66e-11	2.02554	5.26728	4.91e-11
dd_Smed_v6_1978_0_1	AP3B2	AP-3 complex subunit beta-2	AP3B2	AP-3 complex subunit beta-2	Contig1223	0.724862	6.75926	0.00770657	1.69299	5.93599	1.51e-10	1.51737	5.93599	1.22e-08
dd_Smed_v6_1981_0_1	ATP6V0E2	V-type proton ATPase subunit e 2	ATP6V0E2	V-type proton ATPase subunit e 2	Contig4543	0.586264	7.08586	0.019954	2.57987	6.60178	5.62e-12	2.26892	6.60178	1.42e-09
dd_Smed_v6_1984_0_1	NA	NA	CG10527	Uncharacterized protein	Contig7449	-0.162375	6.84089	0.316773	3.43881	6.60001	3.06e-24	3.72979	6.60001	1.18e-27
dd_Smed_v6_199_0_1	NA	NA	NA	NA	Contig7013	-0.594958	8.73789	0.123809	3.17597	6.27548	3.14e-23	3.41526	6.27548	3.42e-26
dd_Smed_v6_1990_0_1	CHN2	Beta-chimaerin	chn2	Chimerin 2	PL05012B1A10	1.62312	7.97171	0.00213005	1.84329	6.16205	2.53e-06	1.81345	6.16205	4.32e-06
dd_Smed_v6_1999_0_1	MEX3D	RNA-binding protein MEX3D	Mex3d	RNA-binding protein MEX3D	PL06004B1A07	-0.717627	6.84267	0.00489951	1.20762	6.07759	4.1e-05	1.12125	6.07759	0.000173526
dd_Smed_v6_20_0_1	HPGDS	Hematopoietic prostaglandin D synthase	HPGDS	Hematopoietic prostaglandin D synthase	Contig217	4.02858	14.0476	2.34e-05	4.67758	12.0825	4.22e-35	4.65689	12.0825	7.67e-35
dd_Smed_v6_2001_0_1	UBB	Epididymis secretory protein Li 50	UBB	Epididymis secretory protein Li 50	Contig747	1.33039	8.83964	0.000119324	1.33489	6.34067	4.48e-06	1.29619	6.34067	9.95e-06
dd_Smed_v6_2002_0_1	CPOX	Oxygen-dependent coproporphyrinogen-III oxidase, mitochondrial	Coprox	Oxygen-dependent coproporphyrinogen-III oxidase	Contig4232	0.123369	7.97882	0.431941	1.85227	6.30407	4.24e-12	1.93039	6.30407	6.09e-13
dd_Smed_v6_2006_0_1	IST1	IST1 homolog	Ist1	IST1 homolog	Contig5569	1.8998	9.89255	5.56e-05	1.87593	7.26393	7.77e-10	1.75936	7.26393	9.71e-09
dd_Smed_v6_2009_0_1	ACSL5	Long-chain-fatty-acid--CoA ligase 5	Acsl5	Long-chain-fatty-acid--CoA ligase 5	Contig316	-0.0943712	7.81804	0.578818	4.66776	6.11598	2.04e-48	4.32502	6.11598	6.77e-43
dd_Smed_v6_2010_0_1	NA	NA	NA	NA	Contig7646	1.88413	8.1739	0.00100788	2.63987	6.35939	9.07e-20	2.3802	6.35939	1.87e-16
dd_Smed_v6_2011_0_1	EPHX3	Epoxide hydrolase 3	Ephx4	Epoxide hydrolase 4	Contig6004	1.22927	8.12105	0.00403494	2.67617	6.33986	9.92e-22	2.71069	6.33986	3.6e-22
dd_Smed_v6_2012_0_1	COMMD10	COMM domain-containing protein 10	COMMD10	COMM domain-containing protein 10	Contig343	1.48677	8.60292	0.000220749	1.13134	6.37521	0.000771942	1.02151	6.37521	0.00305013
dd_Smed_v6_2021_0_1	PI16	Peptidase inhibitor 16	PI16	Peptidase inhibitor 16	PL06010B1C01	-0.378308	6.4884	0.176653	7.78784	5.82134	1.34e-74	6.47356	5.82134	2.27e-57
dd_Smed_v6_2022_0_1	LPCAT1	Lysophosphatidylcholine acyltransferase 1	lpcat1	Lysophosphatidylcholine acyltransferase 1	Contig4628	1.1019	8.9037	0.000147795	1.26873	5.34529	5.51e-06	1.23362	5.34529	1.17e-05
dd_Smed_v6_2024_0_1	IFI30	Gamma-interferon-inducible lysosomal thiol reductase	ifi30	Gamma-interferon-inducible lysosomal thiol reductase	Contig1410	-0.404609	7.59734	0.0513171	2.72292	5.6127	5.76e-13	2.20894	5.6127	4.68e-09
dd_Smed_v6_2031_0_1	NOTCH3	Neurogenic locus notch homolog protein 3	Svep1	Sushi, von Willebrand factor type A, EGF and pentraxin domain-containing protein 1	Contig6326	1.6639	8.21781	0.00185386	1.96492	5.59227	6.25e-12	1.87739	5.59227	6.03e-11
dd_Smed_v6_2032_0_1	EPB41L2	EPB41L2 protein	EPB41L2	EPB41L2 protein	Contig7446	0.661844	6.56144	0.0473828	1.20794	7.69242	4.36e-05	1.00079	7.69242	0.000971373
dd_Smed_v6_20353_0_1	SLC32A1	Vesicular inhibitory amino acid transporter	unc-47	Vesicular GABA transporter	PL06018A1E03	0.177794	6.07184	0.463827	6.29428	2.25472	2.95e-11	6.96802	2.25472	5.72e-13
dd_Smed_v6_2042_0_1	NA	NA	NA	NA	Contig6660	2.04783	8.73103	0.000948001	1.45288	5.87694	1.32e-06	1.53452	5.87694	3.58e-07
dd_Smed_v6_2044_0_1	TPRG1L	Tumor protein p63-regulated gene 1-like protein	Tprg1l	Tumor protein p63-regulated gene 1-like protein	Contig1	1.28325	9.58847	0.000102681	1.63694	7.03431	2.14e-09	1.42714	7.03431	2.4e-07
dd_Smed_v6_20482_0_1	-	Heat shock 70kDa protein 8 isoform 2 variant	-	Heat shock 70kDa protein 8 isoform 2 variant	Contig4015	0.208125	5.76122	0.215009	3.99901	2.64891	5.9e-07	3.26803	2.64891	3.86e-05
dd_Smed_v6_2061_0_1	NA	NA	CG3884	RE21371p	Contig776	2.09441	8.38225	7.79e-05	3.85221	6.86321	1.37e-31	3.79706	6.86321	8.03e-31
dd_Smed_v6_2062_0_1	CMBL	Carboxymethylenebutenolidase homolog	cmbl	Carboxymethylenebutenolidase homolog (Pseudomonas)	Contig5852	-0.468169	8.88913	0.0318043	1.12692	6.14465	0.00190768	1.23682	6.14465	0.000680053
dd_Smed_v6_2066_0_1	LMAN2	Vesicular integral-membrane protein VIP36	CG5510	CG5510	Contig2588	0.202749	7.99	0.374879	0.97658	5.23969	0.00610516	1.04542	5.23969	0.00349574
dd_Smed_v6_2069_0_1	NA	NA	NA	NA	Contig542	0.329332	8.2322	0.0798333	1.09953	5.87145	4.46e-05	0.875463	5.87145	0.00165664
dd_Smed_v6_2075_0_1	PANK1	Pantothenate kinase 1	Pank3	Pantothenate kinase 3	Contig5043	1.91154	9.07549	8.63e-05	2.57659	7.20409	5.67e-19	2.78592	7.20409	1.16e-21
dd_Smed_v6_2076_0_1	PGRMC2	Membrane-associated progesterone receptor component 2	MSBP	LD12946p	Contig3231	0.623873	6.94807	0.0249652	1.11914	5.79456	0.000250567	1.05481	5.79456	0.000683259
dd_Smed_v6_2083_0_1	CYP2A13	Cytochrome P450 2A13	Cyp2j6	Cytochrome P450 2J6	Contig4575	0.879353	7.77391	0.000644189	3.05544	5.36453	1.3e-13	3.26074	5.36453	4.4e-15
dd_Smed_v6_2084_0_1	BEST2	Bestrophin-2	Best1	Bestrophin homolog	Contig1597	1.99506	8.0676	0.00012255	2.11483	5.68053	6.53e-15	2.20752	5.68053	4.99e-16
dd_Smed_v6_2085_0_1	TECR	Very-long-chain enoyl-CoA reductase	art-1	Probable very-long-chain enoyl-CoA reductase art-1	Contig4808	-0.76363	9.46774	0.000893328	1.21807	5.49481	3.86e-05	1.08535	5.49481	0.000316919
dd_Smed_v6_2087_0_1	PISD	Phosphatidylserine decarboxylase proenzyme, mitochondrial	Pisd	Phosphatidylserine decarboxylase proenzyme, mitochondrial	PL04006B1F08	0.890258	7.74739	0.00239393	2.61506	6.91392	1.54e-14	2.65246	6.91392	7.95e-15
dd_Smed_v6_2096_0_1	RDH13	Retinol dehydrogenase 13	CG2064	CG2064	Contig5365	1.49602	9.394	7.19e-05	2.24789	5.70108	2.65e-15	2.13031	5.70108	7.13e-14
dd_Smed_v6_2097_0_1	NA	NA	NA	NA	Contig7349	2.11986	7.72837	0.00229584	2.9012	4.16994	1.14e-15	2.92266	4.16994	8.13e-16
dd_Smed_v6_2098_0_1	CISD2	CDGSH iron-sulfur domain-containing protein 2	Cisd2	CDGSH iron-sulfur domain-containing protein 2	Contig7040	0.108549	9.48164	0.680515	1.40909	5.12402	0.00167487	1.70126	5.12402	0.000140479
dd_Smed_v6_2099_0_1	RAB4A	Ras-related protein Rab-4A	RAB4A	Ras-related protein Rab-4A	Contig942	0.8304	8.69624	0.00106692	1.38109	5.81825	6.24e-07	1.25123	5.81825	8.12e-06
dd_Smed_v6_2104_0_1	BIRC2	Baculoviral IAP repeat-containing protein 2	Diap2	Death-associated inhibitor of apoptosis 2	Contig778	2.13638	8.64889	9.61e-05	2.17291	7.26344	7.78e-16	2.03526	7.26344	4.74e-14
dd_Smed_v6_2106_0_1	MAP2K6	Dual specificity mitogen-activated protein kinase kinase 6	MAP2K6	Dual specificity mitogen-activated protein kinase kinase 6	Contig1542	1.60991	9.40573	4.53e-05	1.85814	4.7223	0.000102874	1.60602	4.7223	0.000996512
dd_Smed_v6_2112_0_1	USP4	Ubiquitin specific peptidase 4 (Proto-oncogene), isoform CRA_b	Usp4	Ubiquitin carboxyl-terminal hydrolase 4	Contig937	1.73726	8.83796	4.43e-05	2.18262	5.20775	6.17e-12	2.08931	5.20775	5.37e-11
dd_Smed_v6_2115_0_1	AGPS	Alkyldihydroxyacetonephosphate synthase, peroxisomal	Agps	Alkyldihydroxyacetonephosphate synthase, peroxisomal	Contig5231	-0.00234645	7.49965	0.730123	1.61027	5.68702	6.23e-10	1.34518	5.68702	3.33e-07
dd_Smed_v6_212_0_1	NA	NA	NA	NA	Contig1080	2.94842	11.8516	2.53e-05	3.16549	7.02166	6.26e-27	2.9744	7.02166	3.42e-24
dd_Smed_v6_2129_0_1	STAM2	Signal transducing adapter molecule 2	STAM2	Signal transducing adapter molecule 2	Contig7489	0.830294	7.97303	0.00912569	1.37451	5.40711	1.58e-06	1.14333	5.40711	8.87e-05
dd_Smed_v6_2131_0_1	NA	NA	Lamp1	Lysosome-associated membrane glycoprotein 1	Contig2529	2.41167	9.41011	0.000399959	2.10455	4.60618	1.07e-07	2.39595	4.60618	1.74e-09
dd_Smed_v6_2132_0_1	NA	NA	kune	RH22958p	Contig4683	0.738158	9.22713	0.00175577	1.33191	5.85832	9.08e-06	1.32523	5.85832	1.16e-05
dd_Smed_v6_2137_0_1	LAMTOR2	Ragulator complex protein LAMTOR2	Lamtor2	Ragulator complex protein LAMTOR2	Contig623	1.26328	9.22851	0.00149063	1.8881	6.54812	2.33e-06	1.62281	6.54812	6.14e-05
dd_Smed_v6_2138_0_1	BARD1	BRCA1 associated RING domain 1	ankrd52	Serine/threonine-protein phosphatase 6 regulatory ankyrin repeat subunit C	Contig2203	0.915335	6.95603	0.0369583	3.01194	4.22414	6.18e-19	2.6624	4.22414	2.85e-15
dd_Smed_v6_214_0_1	RPS29	40S ribosomal protein S29	RpS29	40S ribosomal protein S29	Contig7468	-1.17401	9.94645	0.00810385	1.24798	8.21732	0.0218745	1.43012	8.21732	0.00879281
dd_Smed_v6_214_1_1	GM2A	Ganglioside GM2 activator	GM2A	Ganglioside GM2 activator	Contig202	-0.973408	10.8071	0.00409371	7.58952	9.56679	1.63e-65	5.41573	9.56679	5.31e-41
dd_Smed_v6_215_0_1	PSAP	Prosaposin	psap	Prosaposin	Contig3017	4.20168	11.3843	3.67e-05	6.50815	9.49577	7.15e-49	6.61362	9.49577	6.35e-50
dd_Smed_v6_2154_0_1	ADSS	Adenylosuccinate synthetase isozyme 2	adss	Adenylosuccinate synthetase isozyme 2	Contig5573	0.0090781	7.42607	0.880988	1.65385	7.25916	3.2e-08	1.50923	7.25916	5.66e-07
dd_Smed_v6_2161_0_1	GBE1	1,4-alpha-glucan-branching enzyme	GBE1	1,4-alpha-glucan-branching enzyme	PL06012A1F02	-0.454117	6.4259	0.0399509	0.831138	6.60586	0.00374567	1.01452	6.60586	0.000345707
dd_Smed_v6_2167_0_1	RAP1B	Ras-related protein Rap-1b	Rap1b	Ras-related protein Rap-1b	Contig5057	1.4256	7.88164	0.00331257	3.07727	3.39949	1.21e-08	2.29744	3.39949	2.11e-05
dd_Smed_v6_2174_0_1	NA	NA	NA	NA	PL04003X1H06	-0.456932	8.9216	0.0233046	1.91503	6.34388	4.08e-11	1.90149	6.34388	6.57e-11
dd_Smed_v6_2180_0_1	PRKAR1B	cAMP-dependent protein kinase type I-beta regulatory subunit	Pka-R1	cAMP-dependent protein kinase type I regulatory subunit	Contig6556	0.580263	8.48038	0.0513187	1.09554	6.18916	0.00063459	0.79752	6.18916	0.0189562
dd_Smed_v6_2183_0_1	DUSP22	Dual specificity protein phosphatase 22	Dusp15	Dual specificity protein phosphatase 15	Contig3397	1.06676	8.85798	0.000865428	1.07305	5.38748	0.000110517	0.771547	5.38748	0.00835401
dd_Smed_v6_2186_0_1	EXOC6B	Exocyst complex component 6B	exoc6b	Exocyst complex component	Contig5590	0.112818	6.18177	0.436338	2.01047	5.3714	8.78e-11	1.84898	5.3714	2.92e-09
dd_Smed_v6_219_0_1	CTSC	Dipeptidyl peptidase 1	CTSC	Dipeptidyl peptidase 1	Contig6604	4.04494	12.287	0.000760785	3.21565	9.88523	4.95e-25	3.2137	9.88523	5.71e-25
dd_Smed_v6_21906_0_1	ME1	NADP-dependent malic enzyme	Men	Malic enzyme	PL08002A1F01	0.376059	6.58201	0.228297	5.15719	1.43549	3.33e-05	4.97977	1.43549	6.55e-05
dd_Smed_v6_2209_0_1	DLG5	Disks large homolog 5	zoo-1	ZO-1 (Zonula Occludens tight junctional protein) Ortholog	Contig2642	0.472474	8.28128	0.0122411	1.3196	6.34033	7.82e-06	1.39278	6.34033	2.6e-06
dd_Smed_v6_2219_0_1	HAL	Histidine ammonia-lyase	hal	Histidine ammonia-lyase	Contig6136	0.45527	8.39591	0.0419948	5.78735	6.93603	3.99e-64	5.67341	6.93603	3.94e-62
dd_Smed_v6_2224_0_1	ENPEP	Aminopeptidase	ENPEP	Aminopeptidase	PL06012A1D10	0.513881	6.91594	0.027212	4.16877	4.0147	4.92e-11	4.34273	4.0147	1.17e-11
dd_Smed_v6_2226_0_1	EEF2K	Eukaryotic elongation factor 2 kinase	Eef2k	Eukaryotic elongation factor 2 kinase	PL08006B1H11	0.509727	8.10666	0.201994	2.90704	2.44937	0.000320149	3.48748	2.44937	2.16e-05
dd_Smed_v6_2228_0_1	ACF	Apobec-1 complementation factor, isoform CRA_b	rbm47	RNA-binding motif protein 47	Contig5391	1.43904	7.64225	6.84e-05	1.81135	7.36128	1.32e-10	1.98677	7.36128	2.17e-12
dd_Smed_v6_2230_0_1	ATP1B2	Sodium/potassium-transporting ATPase subunit beta-2	nrv1	Sodium/potassium-transporting ATPase subunit beta-1	Contig6169	1.70263	9.9018	0.000786581	2.58378	5.74516	6.7e-16	2.50762	5.74516	4.81e-15
dd_Smed_v6_2234_0_1	NA	NA	NA	NA	Contig4042	0.476283	6.65178	0.0191412	1.64357	7.06147	2.67e-07	1.7736	7.06147	3.15e-08
dd_Smed_v6_2235_0_1	OSTF1	Osteoclast-stimulating factor 1	OSTF1	Osteoclast-stimulating factor 1	Contig516	1.08876	9.45134	0.000255874	1.2653	6.11762	2.6e-05	0.973511	6.11762	0.0017502
dd_Smed_v6_2239_0_1	PTP4A3	Protein tyrosine phosphatase type IVA 3	PRL-1	Putative prenylated protein tyrosine phosphatase	Contig1506	1.1362	9.13973	0.00028237	1.48362	6.17402	2.46e-08	1.1785	6.17402	1.35e-05
dd_Smed_v6_22397_0_1	NA	NA	NA	NA	Contig5050	0.423244	6.33798	0.0242633	5.24779	0.94541	0.000518087	5.39089	0.94541	0.00043924
dd_Smed_v6_2249_0_1	PEX13	Peroxisomal membrane protein PEX13	PEX13	Peroxisomal membrane protein PEX13	Contig2483	0.631534	7.33601	0.0113006	1.67821	6.21972	3.9e-10	1.50183	6.21972	2.76e-08
dd_Smed_v6_2256_0_1	TSPO	Translocator protein	tspo	Translocator protein	Contig831	-0.0209423	9.69641	0.818007	1.13696	4.63626	0.000351025	0.448501	4.63626	0.239936
dd_Smed_v6_2257_0_1	CYP3A43/CYP3A4	Cytochrome P450	Cyp3a41a	Cytochrome P450 3A41	Contig7163	1.53985	8.01637	0.00314838	3.1366	5.90305	1e-18	3.00787	5.90305	2.12e-17
dd_Smed_v6_2260_0_1	NA	NA	NA	NA	Contig5269	0.996316	8.07979	0.000350039	1.35458	7.56937	0.000118796	1.15012	7.56937	0.00145126
dd_Smed_v6_2262_0_1	NA	NA	NA	NA	Contig5960	2.07647	8.99958	0.000647427	1.08131	7.08756	0.000237317	1.12498	7.08756	0.000144013
dd_Smed_v6_2267_0_1	EIF5	Eukaryotic translation initiation factor 5	C37C3.2	Eukaryotic translation initiation factor 5	Contig5092	0.518184	8.70654	0.111362	1.00735	5.8833	0.000864981	0.755849	5.8833	0.0180983
dd_Smed_v6_2271_0_1	SNX32	Sorting nexin-32	SNX32	Sorting nexin-32	Contig1649	1.0016	8.27237	0.000286079	2.32897	6.14152	4.06e-15	2.08555	6.14152	2.1e-12
dd_Smed_v6_2272_0_1	FLNB	Filamin-B	cher	Filamin-A	Contig3925	0.0891459	6.49646	0.459579	1.35908	6.37391	1.36e-06	1.11622	6.37391	9.98e-05
dd_Smed_v6_2277_0_1	TRAF6	TNF receptor-associated factor 6	TRAF6	TNF receptor-associated factor 6	Contig1182	0.747643	6.98263	0.280856	1.07775	5.0223	0.0030771	1.58142	5.0223	9.15e-06
dd_Smed_v6_2281_0_1	SFT2D1	Vesicle transport protein SFT2A	SFT2D1	Vesicle transport protein SFT2A	Contig3158	1.53081	8.71991	9.87e-05	1.59694	5.9173	8.11e-09	1.45372	5.9173	1.97e-07
dd_Smed_v6_2282_0_1	CPA4	Carboxypeptidase A4	CT14378	CG8560, isoform A	Contig1315	0.784258	8.2519	0.000785548	0.759191	5.40889	0.0211091	1.11782	5.40889	0.00043265
dd_Smed_v6_229_0_1	NA	NA	NA	NA	Contig7567	4.16819	11.8347	0.000610954	4.40992	9.40925	2.38e-26	4.30231	9.40925	2.57e-25
dd_Smed_v6_2290_0_1	HSD17B14	17-beta-hydroxysteroid dehydrogenase 14	HSD17B14	17-beta-hydroxysteroid dehydrogenase 14	Contig5582	1.30895	8.92328	0.000139649	3.27201	7.24721	5.33e-22	3.02262	7.24721	3.31e-19
dd_Smed_v6_2304_0_1	SCARB2	Lysosome membrane protein 2	scarb2	Lysosome membrane protein II	Contig2148	2.26275	8.60287	4.64e-05	2.34846	6.74405	2.98e-16	2.33511	6.74405	4.97e-16
dd_Smed_v6_23064_0_1	NA	NA	NA	NA	PL04006A2A08	0.224842	6.09473	0.128553	6.56262	1.28951	4.8e-05	6.59073	1.28951	5.24e-05
dd_Smed_v6_231_0_1	TBCA	Tubulin-specific chaperone A	TBCA	Tubulin-specific chaperone A	Contig249	1.74117	10.3121	0.000366714	1.32408	8.13802	1.56e-05	1.30798	8.13802	2.31e-05
dd_Smed_v6_2311_0_1	ELOVL4	Elongation of very long chain fatty acids protein 4	ELOVL4	Elongation of very long chain fatty acids protein 4	Contig6090	2.40665	9.33475	0.00064886	2.64173	5.20341	4.15e-18	2.48775	5.20341	2.93e-16
dd_Smed_v6_2318_0_1	NA	NA	conv	Acid labile subunit	Contig5910	1.0482	6.2591	0.00628573	4.03209	6.12493	3.9e-38	3.90498	6.12493	3.68e-36
dd_Smed_v6_2328_0_1	MTAP	S-methyl-5'-thioadenosine phosphorylase	Mtap	S-methyl-5'-thioadenosine phosphorylase	Contig5155	-0.460184	7.18969	0.300035	0.981602	5.10257	0.00173583	1.19247	5.10257	0.00012291
dd_Smed_v6_2329_0_1	HEL-S-44	Superoxide dismutase [Cu-Zn]	sod1	Superoxide dismutase [Cu-Zn]	Contig3393	-0.0721341	6.56047	0.119466	1.22451	5.59345	3.46e-05	1.41011	5.59345	1.82e-06
dd_Smed_v6_2336_0_1	HMCN1	Hemicentin-1	syg-2	Synaptogenesis protein syg-2	PL05002B2A04	0.357483	7.37498	0.081059	4.3843	5.71054	1.95e-35	4.37653	5.71054	2.49e-35
dd_Smed_v6_2345_0_1	ADD1	Alpha-adducin	ADD1	Alpha-adducin	Contig2079	-0.0479102	7.62265	0.753417	1.09675	7.77195	0.000507489	0.939075	7.77195	0.00389591
dd_Smed_v6_2350_0_1	NA	NA	NA	NA	PL05003B2C05	0.922752	7.073	0.00182559	1.99512	4.19476	5.35e-07	2.29897	4.19476	8.69e-09
dd_Smed_v6_2351_0_1	CYP2B6	Cytochrome P450 2B6	Cyp2b19	Cytochrome P450 2B19	Contig1511	1.86189	9.13369	7.11e-05	2.33813	4.67198	7.67e-12	2.32031	4.67198	1.29e-11
dd_Smed_v6_2361_0_1	SLC47A1	Multidrug and toxin extrusion protein 1	slc47a1	Multidrug and toxin extrusion protein 1	PL06018A2B12	1.30175	7.53937	0.00830667	7.04158	5.77682	7.34e-26	7.07888	5.77682	5.32e-26
dd_Smed_v6_2368_0_1	NA	NA	NA	NA	Contig924	3.40526	9.29525	2.29e-05	2.84491	5.19702	4.61e-15	3.03878	5.19702	8.95e-17
dd_Smed_v6_2387_0_1	NCKAP1	Nck-associated protein 1	NCKAP1	Nck-associated protein 1	Contig5865	1.52313	8.15431	0.000746504	1.70227	5.71105	1.27e-08	1.63803	5.71105	5.3e-08
dd_Smed_v6_2388_0_1	PPT1	Palmitoyl-protein thioesterase 1	PPT1	Palmitoyl-protein thioesterase 1	Contig2665	1.96628	8.80249	4.31e-05	1.37969	6.81093	1.89e-06	1.18072	6.81093	6.06e-05
dd_Smed_v6_2391_0_1	TRAF6	TNF receptor-associated factor 6	Traf6	TNF-receptor-associated factor 2	Contig1407	0.938036	7.655	0.000262823	1.29562	6.0109	0.000199244	1.22396	6.0109	0.000538477
dd_Smed_v6_2397_0_1	NA	NA	NA	NA	Contig3099	0.112261	7.91988	0.466104	1.36874	5.27387	4.6e-05	0.689497	5.27387	0.0652991
dd_Smed_v6_2398_0_1	NA	NA	NA	NA	Contig4193	0.561071	7.52391	0.112685	1.2223	4.37081	0.00449257	0.60181	4.37081	0.229233
dd_Smed_v6_2399_0_1	CAPZA2	F-actin-capping protein subunit alpha-2	CAPZA2	F-actin-capping protein subunit alpha-2	Contig6139	1.14882	8.08046	0.00326467	1.71417	6.95733	8.95e-07	1.73772	6.95733	7.39e-07
dd_Smed_v6_2401_0_1	NA	NA	NA	NA	Contig6834	1.83828	8.46473	0.00251695	3.28368	5.0261	9.22e-14	3.17589	5.0261	5.76e-13
dd_Smed_v6_241_0_1	PSAP	Prosaposin	PSAP	Prosaposin	Contig3945	4.1994	12.0977	2.6e-05	3.60112	8.45703	1.32e-16	3.81663	8.45703	3.8e-18
dd_Smed_v6_2414_0_1	ACSBG2	Long-chain-fatty-acid--CoA ligase ACSBG2	ACSBG2	Long-chain-fatty-acid--CoA ligase ACSBG2	Contig5096	0.0832364	7.88163	0.581232	1.14559	5.43775	9.21e-05	1.51313	5.43775	1.88e-07
dd_Smed_v6_2424_0_1	ZDHHC17	Palmitoyltransferase ZDHHC17	Patsas	Palmitoyltransferase	Contig5919	0.0706945	6.42112	0.421205	0.710176	5.10099	0.0897783	1.33057	5.10099	0.00064904
dd_Smed_v6_2433_0_1	NA	NA	NA	NA	Contig159	0.0418911	7.91759	0.837275	1.9735	4.83744	5.94e-06	2.03429	4.83744	3.48e-06
dd_Smed_v6_2445_0_1	GPAT4	Glycerol-3-phosphate acyltransferase 4	gpat3	Glycerol-3-phosphate acyltransferase 3	Contig3816	0.874764	8.55766	0.000469204	1.25964	5.84317	1.07e-05	1.23287	5.84317	1.93e-05
dd_Smed_v6_2446_0_1	NA	NA	NA	NA	Contig1700	1.35695	8.49306	0.000204286	1.5689	6.60389	5.69e-07	1.32246	6.60389	3.27e-05
dd_Smed_v6_2447_0_1	TOM1L2	TOM1-like protein 2	Tom1l2	TOM1-like protein 2	Contig6128	0.773827	6.84629	0.00332283	1.50361	4.81167	3.79e-06	1.57242	4.81167	1.46e-06
dd_Smed_v6_245_0_1	NA	NA	NA	NA	Contig7205	3.12968	11.5626	0.000623705	3.28009	8.68821	1.15e-26	3.18278	8.68821	2.58e-25
dd_Smed_v6_2464_0_1	HSD17B12	Very-long-chain 3-oxoacyl-CoA reductase	HSD17B12	Very-long-chain 3-oxoacyl-CoA reductase	Contig5996	-0.567329	7.85344	0.136482	1.0396	7.03263	0.000320118	1.21929	7.03263	2.3e-05
dd_Smed_v6_2465_0_1	ARL8B	ADP-ribosylation factor-like protein 8B	ARL8B	ADP-ribosylation factor-like protein 8B	Contig3195	0.847521	9.04941	0.000249654	1.33981	5.01105	1.3e-05	0.944631	5.01105	0.00321782
dd_Smed_v6_2467_0_1	TPD52	Tumor protein D52	TPD52	Tumor protein D52	Contig988	0.745813	7.19342	0.00115162	1.16849	5.63683	0.000436385	0.854572	5.63683	0.0149147
dd_Smed_v6_2472_0_1	DGAT1	Diacylglycerol O-acyltransferase 1	Dgat1	Diacylglycerol O-acyltransferase 1	PL03018A2H07	0.352012	7.16414	0.0789209	3.25721	4.30246	3.52e-14	2.99748	4.30246	2.68e-12
dd_Smed_v6_2480_0_1	NAPB	Beta-soluble NSF attachment protein	alphaSnap	Alpha-soluble NSF attachment protein	Contig3520	0.823311	7.769	0.000560456	1.11105	6.25154	0.000240222	1.02805	6.25154	0.000848038
dd_Smed_v6_2482_0_1	TXNDC17	Thioredoxin domain-containing protein 17	cl	Clot protein	Contig1671	1.37543	9.64589	5.82e-05	1.18687	7.19009	8.27e-06	1.01078	7.19009	0.000196975
dd_Smed_v6_2489_0_1	TM2D1	TM2 domain-containing protein 1	TM2D1	TM2 domain-containing protein 1	Contig2414	0.327164	8.30863	0.0398681	1.08557	5.09563	0.000434659	0.718117	5.09563	0.0304769
dd_Smed_v6_2494_0_1	RAB43	Ras-related protein Rab-43	RAB43	Ras-related protein Rab-43	Contig907	1.42256	9.15185	0.000635016	2.12136	6.68698	1.08e-11	1.9796	6.68698	2.64e-10
dd_Smed_v6_2495_0_1	NA	NA	NA	NA	Contig6009	2.25777	8.75052	0.000860213	2.64006	5.95039	1.74e-13	2.40667	5.95039	1.85e-11
dd_Smed_v6_25_0_1	NID2	Nidogen-2	NID2	Nidogen-2	Contig2192	-0.838586	11.9592	0.0169822	3.47063	12.5196	6.63e-17	6.47864	12.5196	2.98e-43
dd_Smed_v6_2501_0_1	COMMD4	COMM domain-containing protein 4	Commd4	COMM domain-containing protein 4	Contig2611	1.35833	7.99172	0.000123934	2.07258	4.11844	1.42e-09	1.97871	4.11844	8.85e-09
dd_Smed_v6_2508_0_1	KLHDC8A	Kelch domain-containing protein 8A	KLHDC8A	Kelch domain-containing protein 8A	Contig1709	-0.071945	7.30111	0.592741	0.881844	4.43252	0.0289321	1.07857	4.43252	0.00693229
dd_Smed_v6_2510_0_1	AP3S2	AP-3 complex subunit sigma-2	or	Adaptor protein complex AP-3 small chain sigma3	Contig2102	1.84687	8.07552	0.000659003	2.32564	5.7736	1.64e-11	2.38171	5.7736	6.46e-12
dd_Smed_v6_2511_0_1	NA	NA	CG43778	Uncharacterized protein, isoform D	Contig174	2.45743	8.75586	3.93e-05	4.35557	5.18666	3.31e-28	4.27391	5.18666	2.49e-27
dd_Smed_v6_2513_0_1	SNX27	Sorting nexin-27	CG32758	LD13361p	Contig362	1.33691	8.38024	0.0001135	1.68399	5.20717	1.09e-07	1.58911	5.20717	6.53e-07
dd_Smed_v6_2519_0_1	CCDC93	Coiled-coil domain-containing protein 93	ccdc93	Coiled-coil domain containing 93	Contig1890	1.32969	7.99352	9.61e-05	1.43628	5.51276	1.15e-06	1.47306	5.51276	6.82e-07
dd_Smed_v6_2523_0_1	MELTF	Melanotransferrin	Tsf2	LD22449p	Contig6091	0.190257	6.73483	0.196404	1.71201	4.07911	6.35e-05	1.48743	4.07911	0.000648589
dd_Smed_v6_253_0_1	ATP6V0C	V-type proton ATPase 16 kDa proteolipid subunit	atp6v0ca	V-type proton ATPase proteolipid subunit	Contig429	2.93979	12.5909	2.29e-05	2.19484	10.1273	3.81e-13	2.05117	10.1273	1.29e-11
dd_Smed_v6_2530_0_1	SLC38A7	Putative sodium-coupled neutral amino acid transporter 7	slc38a7	Putative sodium-coupled neutral amino acid transporter 7	Contig2706	0.432974	7.23575	0.0238866	2.28921	6.21812	5.14e-14	2.23034	6.21812	2.48e-13
dd_Smed_v6_2531_0_1	BLOC1S1	Biogenesis of lysosome-related organelles complex 1 subunit 1	Blos1	Biogenesis of lysosome-related organelles complex 1 subunit 1	Contig7275	0.756947	8.17487	0.00929282	1.96949	4.29639	2.84e-05	1.80081	4.29639	0.000153864
dd_Smed_v6_2534_0_1	AP3D1	AP-3 complex subunit delta-1	Ap3d1	AP-3 complex subunit delta-1	Contig3354	1.50402	8.87017	4.78e-05	1.76489	8.41573	1.83e-10	1.71815	8.41573	6.57e-10
dd_Smed_v6_2538_0_1	PRKAA2	5'-AMP-activated protein kinase catalytic subunit alpha-2	AMPKalpha	Non-specific serine/threonine protein kinase	Contig5913	0.00747071	7.61022	0.976683	1.42273	4.3881	7.05e-05	1.22873	4.3881	0.000781646
dd_Smed_v6_254_0_1	BMP1	Bone morphogenetic protein 1	CG7631	Metalloendopeptidase	Contig354	-0.795176	10.2738	0.00591887	8.08676	10.5913	8.87e-53	4.38894	10.5913	3.99e-22
dd_Smed_v6_2549_0_1	RUFY1	RUN and FYVE domain-containing protein 1	rufy2	RUN and FYVE domain-containing 2	Contig2383	1.99516	8.59197	3.25e-05	1.73147	6.26542	8.92e-11	1.62817	6.26542	1.34e-09
dd_Smed_v6_2552_0_1	NA	NA	cold	Coiled, isoform A	Contig3163	0.906022	8.79046	0.00116907	1.10726	5.97611	0.000362894	1.00924	5.97611	0.00146529
dd_Smed_v6_2559_0_1	C10orf11	Leucine-rich repeat-containing protein C10orf11	CG31274	LP05795p	Contig2265	2.91512	9.08794	5.34e-05	7.63212	4.48885	1.16e-28	7.73817	4.48885	3.44e-29
dd_Smed_v6_2563_0_1	TWF1	Twinfilin-1	TWF1	Twinfilin-1	Contig2453	1.77179	8.78461	7.25e-05	1.60051	6.51274	3.71e-08	1.23788	6.51274	2.92e-05
dd_Smed_v6_2564_0_1	NA	NA	NA	NA	Contig6474	1.19893	7.55047	0.00381664	3.09683	6.75825	2.56e-29	3.04198	6.75825	2.14e-28
dd_Smed_v6_2567_0_1	SOAT1	Sterol O-acyltransferase 1	SOAT1	Sterol O-acyltransferase 1	Contig1658	0.716832	8.02291	0.00226233	3.67978	6.30521	4.12e-34	3.11689	6.30521	8.34e-26
dd_Smed_v6_257_0_1	LIPF	Gastric triacylglycerol lipase	lipf	Lipase	Contig6353	-1.16042	11.0951	0.000876411	4.99268	10.6471	3.26e-47	3.31431	10.6471	1.29e-24
dd_Smed_v6_2572_0_1	VPS28	Vacuolar protein sorting-associated protein 28 homolog	VPS28	Vacuolar protein sorting-associated protein 28 homolog	Contig5241	1.01912	8.56314	0.000730948	0.761828	6.03532	0.0261186	1.09774	6.03532	0.000921677
dd_Smed_v6_2579_0_1	DNAJC13	DnaJ homolog subfamily C member 13	Dnajc13	DnaJ heat shock protein family (Hsp40) member C13	Contig6495	1.81275	8.57436	0.000716297	2.13371	7.71201	5.64e-14	2.02044	7.71201	1.22e-12
dd_Smed_v6_2582_1_1	METTL27	Methyltransferase-like protein 27	METTL27	Methyltransferase-like protein 27	Contig4678	2.16647	8.77858	2.92e-05	5.59679	5.7227	4.67e-47	5.18521	5.7227	6.84e-42
dd_Smed_v6_2583_0_1	DNM3	Dynamin-3	Dnm3	Dynamin-3	Contig3030	0.437325	6.52658	0.0084686	1.33479	5.70512	1.47e-05	1.18911	5.70512	0.000143327
dd_Smed_v6_2584_0_1	NA	NA	NA	NA	Contig3274	0.752069	6.27394	0.00266575	2.25232	3.81126	0.000788072	2.46594	3.81126	0.000268461
dd_Smed_v6_2591_0_1	MRC1	Macrophage mannose receptor 1	mrc1b	Mannose receptor, C type 1b	Contig1679	-0.301724	7.59084	0.294281	3.32693	4.21504	7.6e-09	2.46537	4.21504	1.67e-05
dd_Smed_v6_2596_0_1	SLC36A1	Proton-coupled amino acid transporter 1	CG13384	Uncharacterized protein, isoform D	Contig7529	2.00203	9.34262	0.000849642	2.76917	6.49283	1.71e-23	2.63469	6.49283	1.71e-21
dd_Smed_v6_2599_0_1	TRAF5	TNF receptor-associated factor 5	Traf2	TNF receptor-associated factor 2	Contig1736	2.61056	8.5035	3.74e-05	3.49252	5.72689	4.11e-31	3.36866	5.72689	2.92e-29
dd_Smed_v6_260_0_1	CFL1	Cofilin-1	tsr	Cofilin/actin-depolymerizing factor homolog	Contig513	3.26615	11.2075	2.37e-05	2.62977	9.54785	1.37e-16	2.52069	9.54785	2.25e-15
dd_Smed_v6_2603_0_1	RAB1B	Ras-related protein Rab-1B	Rab19	RE48347p	Contig6579	2.73832	9.11655	0.000657798	5.37555	6.148	3.74e-35	5.11641	6.148	1.28e-32
dd_Smed_v6_2604_0_1	NA	NA	NA	NA	Contig5144	0.451702	6.98063	0.0265092	5.37109	6.58527	1.63e-62	5.37149	6.58527	2.77e-62
dd_Smed_v6_2615_1_1	NA	NA	NA	NA	Contig3882	1.88456	8.01015	4.05e-05	5.64158	2.98024	1.28e-16	5.44083	2.98024	1.1e-15
dd_Smed_v6_2622_0_1	CNTNAP2	Contactin-associated protein-like 2	Nrx-IV	Neurexin-4	Contig5205	0.80835	7.95131	0.00038126	1.10548	5.87867	8.59e-05	1.06208	5.87867	0.000193427
dd_Smed_v6_2623_0_1	NA	NA	CG5110	Ragulator complex protein LAMTOR3 homolog	Contig787	1.33958	8.35593	0.000186362	1.41139	6.34392	1.48e-06	1.20247	6.34392	5.48e-05
dd_Smed_v6_2630_0_1	NA	NA	NA	NA	Contig639	0.701396	7.01418	0.419449	1.14357	7.1289	2.11e-05	0.957444	7.1289	0.000506687
dd_Smed_v6_2631_0_1	UBE2K	Ubiquitin-conjugating enzyme E2 K	Ubc4	Ubiquitin-conjugating enzyme E2-22 kDa	PL04006A2A10	0.827201	9.42983	0.00373759	1.25406	5.41938	0.000142345	1.15962	5.41938	0.000545403
dd_Smed_v6_2636_0_1	ARPP19	cAMP-regulated phosphoprotein 19	arpp19a	CAMP-regulated phosphoprotein 19a	Contig233	1.73565	9.34504	0.000213517	1.7722	4.17708	7.35e-05	1.98757	4.17708	9.52e-06
dd_Smed_v6_2643_0_1	NA	NA	CG1637	Purple acid phosphatase	Contig3574	2.84557	9.5317	3.02e-05	4.08474	5.41591	9.11e-34	3.92139	5.41591	1.48e-31
dd_Smed_v6_2650_0_1	AP1M1	AP-1 complex subunit mu-1	AP1M1	AP-1 complex subunit mu-1	Contig6283	0.00859272	6.98388	0.885428	1.17619	5.10954	7.37e-05	1.05412	5.10954	0.000490548
dd_Smed_v6_2654_0_1	PCDH1	Protocadherin-1	PCDH1	Protocadherin-1	PL05003B2E03	1.52893	8.02731	0.000392681	1.28698	5.94203	1.15e-05	1.18374	5.94203	6.82e-05
dd_Smed_v6_2663_0_1	ACADVL	Very long-chain specific acyl-CoA dehydrogenase, mitochondrial	ACADVL	Very long-chain specific acyl-CoA dehydrogenase, mitochondrial	Contig3168	0.666989	9.06668	0.0061701	1.97233	2.47267	0.000585289	2.28393	2.47267	7.21e-05
dd_Smed_v6_2667_0_1	ARL8B	ADP-ribosylation factor-like protein 8B	ARL8B	ADP-ribosylation factor-like protein 8B	Contig1889	0.293774	7.22693	0.0767667	1.35062	6.49693	1.59e-06	1.24677	6.49693	1.18e-05
dd_Smed_v6_2669_0_1	TRAF3	TNF receptor-associated factor 3	TRAF3	TNF receptor-associated factor 3	Contig3390	1.96811	7.73085	4.14e-05	2.31387	5.26936	1.64e-16	2.29654	5.26936	3.03e-16
dd_Smed_v6_267_0_1	CTSV	Cathepsin L2	ctsla	Cathepsin La	Contig139	5.14684	13.4423	2.29e-05	5.77641	10.5503	2.34e-36	5.70338	10.5503	1.14e-35
dd_Smed_v6_2670_0_1	MED21	Mediator of RNA polymerase II transcription subunit 21	MED21	Mediator of RNA polymerase II transcription subunit 21	Contig2568	1.28365	8.9068	0.000446423	1.03495	6.70246	0.00028951	0.934218	6.70246	0.00137449
dd_Smed_v6_2672_0_1	TTN	Titin	Olfr1006	Olfactory receptor	Contig6933	1.53934	7.49167	0.00106684	1.5598	6.88637	7.96e-08	1.38434	6.88637	2.43e-06
dd_Smed_v6_2673_0_1	CNTN2	Contactin-2	Cont	Contactin	Contig3005	0.914788	8.1574	0.000340812	1.37556	5.97725	1.97e-06	1.13583	5.97725	0.000116838
dd_Smed_v6_2681_0_1	-	cDNA FLJ46199 fis, clone TESTI4007965, highly similar to AP-1 complex subunit gamma-1	-	cDNA FLJ46199 fis, clone TESTI4007965, highly similar to AP-1 complex subunit gamma-1	Contig6798	1.18742	9.15729	0.00191015	1.16414	7.31784	1.78e-05	0.863199	7.31784	0.00221088
dd_Smed_v6_2685_0_1	GLMP	Glycosylated lysosomal membrane protein	glmp	Glycosylated lysosomal membrane protein	Contig3909	1.7078	7.93546	9.69e-05	2.94191	6.54547	2.38e-19	2.74659	6.54547	3.6e-17
dd_Smed_v6_2690_0_1	PLB1	Phospholipase B1, membrane-associated	Plb1	Phospholipase B1, membrane-associated	Contig3451	3.2808	9.69528	3.32e-05	7.46295	6.38098	2.45e-35	7.24951	6.38098	6.14e-34
dd_Smed_v6_2696_0_1	ADIPOR2	Adiponectin receptor protein 2	AdipoR	Adiponectin receptor protein	Contig5712	1.92431	10.2766	8.4e-05	1.12461	6.6151	5.21e-05	1.02237	6.6151	0.000298626
dd_Smed_v6_2698_0_1	TSPAN3	Tetraspanin-3	tspan34	Tetraspanin	Contig3563	-0.848208	7.6966	0.000401118	2.83134	6.1447	8.22e-22	2.32874	6.1447	1.78e-15
dd_Smed_v6_2699_0_1	GALC	Galactocerebrosidase	Galc	Galactocerebrosidase	Contig1994	1.77921	9.11157	0.00125338	1.68241	7.40507	7.76e-11	1.5339	7.40507	3.81e-09
dd_Smed_v6_270_0_1	NA	NA	NA	NA	Contig731	1.84408	11.1263	3.84e-05	1.36117	8.05025	5.68e-05	1.17595	8.05025	0.000660174
dd_Smed_v6_2702_0_1	SCAMP1	Secretory carrier-associated membrane protein 1	scamp4	Secretory carrier-associated membrane protein	Contig2266	1.21516	8.89831	7.83e-05	1.55318	6.04551	9.06e-09	1.35062	6.04551	7.83e-07
dd_Smed_v6_2703_0_1	PGS1	CDP-diacylglycerol--glycerol-3-phosphate 3-phosphatidyltransferase, mitochondrial	pgs-1	CDP-diacylglycerol--glycerol-3-phosphate 3-phosphatidyltransferase	PL04008B1D05	1.1304	7.31244	0.00557727	2.54368	5.48746	1.84e-21	2.46976	5.48746	2.48e-20
dd_Smed_v6_271_0_1	FABP7	Fatty acid-binding protein, brain	FABP7	Fatty acid-binding protein, brain	Contig167	0.852451	10.1944	0.0149756	3.08993	7.81088	5.44e-15	2.98497	7.81088	4.24e-14
dd_Smed_v6_2710_0_1	SHB	SH2 domain-containing adapter protein B	shda	Src homology 2 domain-containing-transforming protein D, a	PL04023B1F12	1.26706	8.61745	0.00316566	1.06993	5.11668	0.00259501	1.59314	5.11668	4.6e-06
dd_Smed_v6_2711_0_1	NIT1	Nitrilase homolog 1	nft-1	Nitrilase and fragile histidine triad fusion protein NitFhit	Contig6008	0.595281	7.56429	0.0497684	1.04484	4.94172	0.000650527	0.950745	4.94172	0.00244082
dd_Smed_v6_2715_0_1	USP5	Ubiquitin carboxyl-terminal hydrolase 5	Usp5	Ubiquitinyl hydrolase 1	Contig3326	0.254886	7.75908	0.133717	1.06129	5.70424	0.000688689	0.83307	5.70424	0.0109823
dd_Smed_v6_2716_0_1	NKX2-2	Homeobox protein Nkx-2.2	nkx2.2a	Homeobox protein Nkx-2.2a	Contig5669	2.17071	8.21804	3.91e-05	5.37174	6.06666	1.58e-54	5.51756	6.06666	1.15e-56
dd_Smed_v6_2717_0_1	CRYZ	Quinone oxidoreductase	Cryz	Quinone oxidoreductase	Contig2408	-0.260082	7.02422	0.0811317	1.80204	4.0055	0.000838946	1.54789	4.0055	0.00525933
dd_Smed_v6_2719_0_1	NA	NA	NA	NA	Contig3334	2.34386	8.41858	2.9e-05	6.6617	3.16013	7.22e-15	6.44431	3.16013	4.01e-14
dd_Smed_v6_272_0_1	NA	NA	NA	NA	Contig65	3.28514	10.5832	2.29e-05	5.44209	6.01273	8.76e-55	5.01321	6.01273	2.45e-48
dd_Smed_v6_2731_0_1	NA	NA	kune	Kune-kune	Contig4109	0.755642	8.25377	0.00232454	1.03704	6.14511	0.00441743	0.796622	6.14511	0.0390501
dd_Smed_v6_2732_0_1	SNX33	Sorting nexin-33	lst-4	Sorting nexin lst-4	Contig2071	1.70643	8.7277	5.11e-05	2.37268	6.49108	3.09e-16	2.31574	6.49108	1.67e-15
dd_Smed_v6_2741_0_1	CARHSP1	Calcium-regulated heat-stable protein 1	CG9705	Cold shock domain-containing protein CG9705	Contig315	0.17637	8.64941	0.290682	1.00241	4.71714	0.00115899	0.626727	4.71714	0.0639808
dd_Smed_v6_2743_0_1	SHOC2	Leucine-rich repeat protein SHOC-2	Sur-8	Leucine-rich repeat protein soc-2 homolog	PL06013B2A08	0.123337	6.1709	0.318295	1.56218	6.79067	5.77e-09	1.47589	6.79067	4.74e-08
dd_Smed_v6_2757_0_1	UGCG	Ceramide glucosyltransferase	GlcT-1	Ceramide glucosyltransferase	Contig2541	0.614884	7.78266	0.0802285	2.05289	4.18544	5.69e-07	1.87748	4.18544	5.68e-06
dd_Smed_v6_2782_0_1	ANK3	Ankyrin-3	ank3a	Ankyrin 3a	Contig3127	0.845794	8.29515	0.000736394	1.85258	4.52839	5.21e-09	1.47455	4.52839	4.6e-06
dd_Smed_v6_2783_0_1	HMCN1	Hemicentin-1	hmcn1	Hemicentin 1	Contig2486	0.956303	7.78711	0.000527107	0.895301	3.99919	0.0114055	1.00524	3.99919	0.00440892
dd_Smed_v6_279_0_1	NA	NA	rpz4	Rapunzel 4	PL05002B1F01	-0.487931	8.01115	0.211979	7.72012	11.0057	4.09e-50	4.22312	11.0057	4.87e-21
dd_Smed_v6_2790_0_1	ARL6IP1	ADP-ribosylation factor-like protein 6-interacting protein 1	arl6ip1	ADP-ribosylation factor-like 6 interacting protein	Contig6072	0.85377	8.77434	0.006809	1.93475	6.06146	8.46e-14	1.89484	6.06146	3.1e-13
dd_Smed_v6_2791_0_1	NA	NA	NA	NA	Contig2041	2.79623	9.29382	2.29e-05	6.02535	5.27961	2.6e-52	5.58251	5.27961	1.32e-46
dd_Smed_v6_2795_0_1	PSENEN	Gamma-secretase subunit PEN-2	pen-2	Gamma-secretase subunit pen-2	Contig138	0.839995	9.10716	0.00155041	1.13571	6.20183	0.000553652	0.888745	6.20183	0.00977252
dd_Smed_v6_28_0_1	TFPI	Tissue factor pathway inhibitor	podxl2	Podocalyxin-like 2	Contig7372	-0.935942	11.1029	0.00801607	5.11162	10.9657	2.46e-41	5.24662	10.9657	6.37e-43
dd_Smed_v6_280_0_1	ODC1	Ornithine decarboxylase	odc1	Odc1 protein	Contig1882	1.26547	11.7691	0.000117859	1.4331	9.20389	1.84e-05	1.21949	9.20389	0.000352376
dd_Smed_v6_2804_0_1	GMFB	Glia maturation factor beta	Gmfb	Glia maturation factor beta	Contig3584	0.861042	7.7219	0.00340228	1.07302	5.20143	0.00684155	0.852549	5.20143	0.041776
dd_Smed_v6_2813_0_1	CHDH	Choline dehydrogenase, mitochondrial	Chdh	Choline dehydrogenase, mitochondrial	Contig3337	0.983805	7.30538	0.00241086	2.91111	6.30988	7.48e-20	2.98209	6.30988	1.24e-20
dd_Smed_v6_2825_0_1	EPB41L3	Band 4.1-like protein 3	EPB41L3	Band 4.1-like protein 3	PL06016B2D09	0.13235	6.40921	0.268136	1.41699	6.90753	1.23e-06	1.04851	6.90753	0.000487352
dd_Smed_v6_2826_0_1	OPCML	Opioid-binding protein/cell adhesion molecule	Lac	Lachesin	Contig692	0.726062	7.32089	0.0124328	2.35563	2.35534	0.000327966	1.8625	2.35534	0.00577352
dd_Smed_v6_2832_0_1	ACSS3	Acyl-CoA synthetase short-chain family member 3, mitochondrial	ACSS3	Acyl-CoA synthetase short-chain family member 3, mitochondrial	PL06013A1E11	-0.327136	6.84559	0.100705	1.85541	5.75732	2.89e-11	1.8751	5.75732	2.07e-11
dd_Smed_v6_2836_0_1	APBA1	Amyloid beta A4 precursor protein-binding family A member 1	lin-10	Protein lin-10	Contig657	1.0796	8.20409	0.000246457	1.35203	4.16313	0.000160936	1.30165	4.16313	0.000334944
dd_Smed_v6_2839_0_1	MTCH1	Mitochondrial carrier homolog 1	mtch2	Mitochondrial carrier homolog 2	Contig864	1.38132	9.47108	0.000226213	1.50366	5.41399	2.09e-06	1.42568	5.41399	8.33e-06
dd_Smed_v6_2840_0_1	DNAJC5B	DnaJ homolog subfamily C member 5B	Csp	DnaJ homolog subfamily C member 5 homolog	Contig2341	0.928222	7.99342	0.000292907	1.14577	6.94799	0.00101713	1.04037	6.94799	0.003604
dd_Smed_v6_2841_0_1	NA	NA	inx-1	Innexin	Contig2	2.56939	10.1043	5.39e-05	6.26653	5.98284	1.85e-36	6.25162	5.98284	2.65e-36
dd_Smed_v6_2845_0_1	NA	NA	NA	NA	Contig570	0.562125	7.35336	0.0271903	3.68902	3.74893	1.23e-15	3.45285	3.74893	5.49e-14
dd_Smed_v6_2871_0_1	CYP2U1	Cytochrome P450 2U1	cyp2u1	Cytochrome P450, family 2, subfamily U, polypeptide 1	Contig4815	1.63474	8.18554	5.77e-05	3.34128	5.21609	5.04e-14	3.47543	5.21609	6.97e-15
dd_Smed_v6_2879_0_1	RAB6A	RAB6A, member RAS oncogene family, isoform CRA_b	Rab17	Ras-related protein Rab-17	Contig3333	1.73594	8.04854	5.79e-05	1.4757	4.97615	4.18e-08	1.58704	4.97615	3.84e-09
dd_Smed_v6_2886_0_1	BAK1	Bcl-2 homologous antagonist/killer	zgc:153993	Zgc:153993	Contig6675	0.799741	8.93629	0.0117253	2.05079	6.15388	8.89e-08	1.77428	6.15388	4.47e-06
dd_Smed_v6_2889_0_1	NA	NA	NA	NA	PL06015B2E12	0.29332	6.86679	0.159157	1.02963	5.54864	0.000173674	1.1236	5.54864	4.31e-05
dd_Smed_v6_2891_0_1	PDCD10	Programmed cell death protein 10	Ccm3	Cerebral cavernous malformation 3 ortholog	Contig3159	1.10166	9.25129	0.000368222	1.41637	7.16363	1.88e-07	1.41621	7.16363	2.21e-07
dd_Smed_v6_2892_0_1	SCP2	Non-specific lipid-transfer protein	CG17597	SD06839p	Contig5464	0.555953	7.24158	0.0169231	1.75356	4.61802	3.69e-07	2.15605	4.61802	4.28e-10
dd_Smed_v6_2894_0_1	AASS	Alpha-aminoadipic semialdehyde synthase, mitochondrial	LKRSDH	Lysine ketoglutarate reductase/saccharopine dehydrogenase, isoform A	PL03019B1D08	0.244969	6.84078	0.450859	0.8911	4.55261	0.0147963	1.13798	4.55261	0.00151298
dd_Smed_v6_2906_0_1	RAB10	Ras-related protein Rab-10	Rab10	LD39986p	Contig985	1.8169	8.60754	5.57e-05	3.923	5.38319	1.21e-27	3.6639	5.38319	1.07e-24
dd_Smed_v6_2908_0_1	HGD	Homogentisate 1,2-dioxygenase	hgo-1	Homogentisate 1,2-dioxygenase	Contig4548	-0.735218	7.47933	0.00187008	1.02244	4.11439	0.033288	1.33804	4.11439	0.0045511
dd_Smed_v6_2914_0_1	ROCK1	Rho-associated protein kinase 1	rock1	Rho-associated protein kinase	Contig5319	1.36439	7.62771	0.000144835	1.70954	7.01348	1.51e-07	1.72595	7.01348	1.34e-07
dd_Smed_v6_2915_0_1	RAB7L1	RAB7, member RAS oncogene family-like 1	Rab29	Ras-related protein Rab-7L1	Contig2676	1.71159	8.32613	0.000129179	1.47047	5.3073	3.73e-05	1.40586	5.3073	9.63e-05
dd_Smed_v6_2918_0_1	SPNS1	Protein spinster homolog 1	SPNS1	Protein spinster homolog 1	Contig7004	2.0431	8.76866	0.00134773	3.45539	5.13921	2.86e-13	3.37948	5.13921	9.72e-13
dd_Smed_v6_2923_0_1	ENOSF1	Mitochondrial enolase superfamily member 1	enosf1	Enolase superfamily member 1	Contig3419	-0.518727	7.72718	0.0070075	4.40192	5.16215	1.41e-28	5.12717	5.16215	3.46e-36
dd_Smed_v6_2929_0_1	GLIPR2	Golgi-associated plant pathogenesis-related protein 1	Glipr2	Golgi-associated plant pathogenesis-related protein 1	Contig1497	3.00467	9.46132	2.39e-05	2.01951	4.7416	7.48e-12	-0.112363	4.7416	0.813761
dd_Smed_v6_2951_0_1	SCARB2	Lysosome membrane protein 2	scarb2	Lysosome membrane protein II	PL06004B1C11	0.0750629	6.95719	0.701606	1.34193	6.85929	1.26e-06	1.28314	6.85929	4.37e-06
dd_Smed_v6_2970_0_1	HAL	Histidine ammonia-lyase	hal	Histidine ammonia-lyase	PL06017B1B02	0.225259	7.24131	0.182233	3.95165	2.31703	9.5e-06	4.52774	2.31703	6.76e-07
dd_Smed_v6_2976_0_1	NA	NA	vma21	Vacuolar ATPase assembly integral membrane protein vma21	Contig23	0.464768	8.73245	0.0359292	1.31029	5.32251	0.000903131	1.33053	5.32251	0.000849297
dd_Smed_v6_2981_0_1	NPL	N-acetylneuraminate lyase	Npl	N-acetylneuraminate lyase	Contig4097	-0.476699	8.14853	0.00554901	5.35013	2.78235	2.02e-14	5.64937	2.78235	1.4e-15
dd_Smed_v6_2982_0_1	NA	NA	NA	NA	Contig5901	0.138816	8.92354	0.530652	1.14908	4.31968	0.000415201	0.85319	4.31968	0.0129175
dd_Smed_v6_2991_0_1	RAB5A	Ras-related protein Rab-5A	rab-5	RAB family	Contig1027	0.734666	9.42861	0.000547359	1.19749	4.86887	0.00184654	1.21629	4.86887	0.00176533
dd_Smed_v6_2996_0_1	RIN2	Ras and Rab interactor 2	spri	Protein sprint	PL04015A2B09	0.696978	6.42771	0.00779143	1.53452	3.96481	6.51e-05	1.38057	3.96481	0.000409836
dd_Smed_v6_3_0_1	PS1TP5BP1	HCG15971, isoform CRA_a	act-2	Actin-2	Contig1138	3.30363	14.0502	2.58e-05	2.34466	13.2359	3.07e-11	2.25047	13.2359	2.05e-10
dd_Smed_v6_300_0_1	COL6A3	Collagen alpha-3(VI) chain	Spint3	Putative uncharacterized protein	PL06022A1C11	0.00810193	12.1371	0.70989	4.69883	10.7845	1.22e-32	7.04397	10.7845	3.09e-58
dd_Smed_v6_3005_0_1	ADD3	Gamma-adducin	Add3	Gamma-adducin	Contig5036	1.01654	8.11034	0.000667055	1.51429	4.73295	9.97e-07	1.57452	4.73295	4.03e-07
dd_Smed_v6_3016_0_1	NA	NA	NA	NA	Contig4571	0.326658	7.2024	0.121957	4.03081	6.60386	1.2e-44	3.84628	6.60386	2.38e-41
dd_Smed_v6_3019_0_1	SCCPDH	Saccharopine dehydrogenase-like oxidoreductase	CG2604	AT14148p	Contig6372	0.994721	9.19861	0.00416084	2.12748	6.2485	4.14e-13	1.92516	6.2485	6.05e-11
dd_Smed_v6_3021_0_1	ACSL4	Long-chain-fatty-acid--CoA ligase 4	ACSL4	Long-chain-fatty-acid--CoA ligase 4	Contig6048	-0.0490684	6.58659	0.780768	1.57302	6.30072	2.44e-07	1.43141	6.30072	3.34e-06
dd_Smed_v6_3032_0_1	HAAO	3-hydroxyanthranilate 3,4-dioxygenase	Haao	3-hydroxyanthranilate 3,4-dioxygenase	Contig6000	1.36319	7.35826	0.00161243	6.47322	6.07274	3.71e-53	6.35869	6.07274	9e-52
dd_Smed_v6_3038_0_1	TRAF6	TNF receptor-associated factor 6	TRAF6	TNF receptor-associated factor 6	Contig1922	1.85153	7.63583	0.0005132	2.28913	7.35248	3.93e-16	2.16356	7.35248	1.49e-14
dd_Smed_v6_3041_0_1	TMEM120B	Transmembrane protein 120B	CG32795	Transmembrane protein 120 homolog	Contig2527	0.296679	8.30475	0.13864	1.02106	4.60518	0.00182083	0.706474	4.60518	0.0451179
dd_Smed_v6_3045_0_1	WASHC2A	WASH complex subunit 2A	fam21c	Family with sequence similarity 21, member C	PL06019A1G12	0.0614281	6.35624	0.565336	1.46158	7.19408	4.06e-06	1.27464	7.19408	7.52e-05
dd_Smed_v6_3050_0_1	CAB39L	Calcium-binding protein 39-like	cab39l	Calcium binding protein 39-like	Contig3526	0.677838	7.86138	0.00942595	1.2523	5.02714	7.43e-06	1.21011	5.02714	1.77e-05
dd_Smed_v6_3051_0_1	NA	NA	NA	NA	Contig2047	2.43079	8.15848	0.000181328	3.3968	4.25213	7.78e-20	3.26115	4.25213	1.77e-18
dd_Smed_v6_3066_0_1	TMEM41A	Transmembrane protein 41A	tmem41aa	Transmembrane protein 41A-A	Contig4544	1.83346	9.02492	0.000562975	4.17175	6.47835	1.06e-38	3.94469	6.47835	2.44e-35
dd_Smed_v6_3070_0_1	CD109	CD109 antigen	Mcr	LD23292p	Contig3726	1.01802	9.59036	0.000328484	1.20758	6.55674	1.68e-05	0.764337	6.55674	0.0105061
dd_Smed_v6_3071_0_1	CLCN7	H(+)/Cl(-) exchange transporter 7	Clcn7	H(+)/Cl(-) exchange transporter 7	Contig70	2.28947	8.39781	2.29e-05	3.00339	4.55331	9.69e-17	3.13233	4.55331	6.33e-18
dd_Smed_v6_3076_0_1	NA	NA	NA	NA	Contig3355	2.41165	8.40046	2.97e-05	3.09836	4.41507	2.11e-17	2.95377	4.41507	5.34e-16
dd_Smed_v6_3078_0_1	-	Protein kinase C inhibitor-2	Hint2	Histidine triad nucleotide-binding protein 2, mitochondrial	Contig1162	0.286461	6.85506	0.078316	1.07206	4.43649	0.00291936	0.91077	4.43649	0.0151
dd_Smed_v6_3084_0_1	GALK2	N-acetylgalactosamine kinase	Galk2	N-acetylgalactosamine kinase	PL06020A2H10	0.432159	9.18534	0.131541	1.83208	3.25343	0.00251763	1.97976	3.25343	0.00118497
dd_Smed_v6_309_0_1	NA	NA	NA	NA	Contig260	1.78908	9.20531	0.000162171	1.08561	9.34307	0.000614992	1.19676	9.34307	0.000163489
dd_Smed_v6_3096_0_1	CMTM8	CKLF-like MARVEL transmembrane domain-containing protein 8	NA	NA	Contig2990	0.847836	8.97613	0.000358733	2.15749	3.3006	6.21e-07	2.20303	3.3006	4.13e-07
dd_Smed_v6_3097_0_1	TRAF5	TNF receptor-associated factor 5	TRAF5	TNF receptor-associated factor 5	PL06023A1F09	0.389049	6.44993	0.0316421	6.02582	6.22977	7.04e-55	5.87394	6.22977	8.23e-53
dd_Smed_v6_31_0_1	CPA6	Carboxypeptidase A6	CT14378	CG8560, isoform A	Contig828	-0.695796	11.5073	0.00980635	6.68488	8.695	1.33e-18	7.3875	8.695	3.49e-21
dd_Smed_v6_3101_0_1	ANK1	Ankyrin-1	Ank1	Ankyrin-1	Contig6287	-0.431702	7.91021	0.0383816	4.282	5.35318	2.61e-23	4.98125	5.35318	2.04e-29
dd_Smed_v6_3106_0_1	CYP3A4	Cytochrome P450 3A4	Cyp3a13	Cytochrome P450 3A13	PL06016A2C01	0.643547	6.99509	0.124139	4.19331	6.18026	3.59e-38	4.22044	6.18026	1.51e-38
dd_Smed_v6_3125_0_1	CLN5	Ceroid-lipofuscinosis neuronal protein 5	Cln5	Ceroid-lipofuscinosis neuronal protein 5 homolog	Contig2216	3.09375	9.32094	2.67e-05	6.47803	6.05236	3.42e-50	6.62949	6.05236	7.74e-52
dd_Smed_v6_3132_0_1	NA	NA	NA	NA	Contig5000	1.09295	7.98004	0.000313658	2.14483	4.0719	1.06e-06	2.11776	4.0719	1.69e-06
dd_Smed_v6_3136_0_1	PIKFYVE	1-phosphatidylinositol 3-phosphate 5-kinase	PIKFYVE	1-phosphatidylinositol 3-phosphate 5-kinase	PL06022A2H11	0.237455	6.16224	0.0800453	2.11193	5.2389	6.96e-11	1.8056	5.2389	2.99e-08
dd_Smed_v6_3137_0_1	CERS1	Ceramide synthase 1	cers1	Ceramide synthase 1	Contig2269	0.648924	8.45857	0.00375035	1.93334	6.2083	1.36e-11	1.91704	6.2083	2.36e-11
dd_Smed_v6_314_0_1	NA	NA	NA	NA	Contig2793	-1.31039	10.8542	0.000915319	7.60883	9.10921	1.06e-48	7.00661	9.10921	1.48e-43
dd_Smed_v6_3144_0_1	COX11	Cytochrome c oxidase assembly protein COX11, mitochondrial	COX11	Cytochrome c oxidase assembly protein COX11, mitochondrial	Contig2385	-0.119099	8.51987	0.394191	1.09627	5.20379	0.00137468	0.743558	5.20379	0.0440418
dd_Smed_v6_3145_0_1	NA	NA	NA	NA	Contig1623	0.863359	7.37403	0.000358757	1.31447	4.04097	0.000179239	1.05582	4.04097	0.0036607
dd_Smed_v6_3148_0_1	EHD1	EH domain-containing protein 1	rme-1	Receptor Mediated Endocytosis	Contig4857	1.76129	8.22725	6.09e-05	1.97179	7.67244	2.73e-10	2.04514	7.67244	6.97e-11
dd_Smed_v6_3154_0_1	AGXT2	Alanine--glyoxylate aminotransferase 2, mitochondrial	Dmel\CG11241	IP18034p	PL05005A1D08	0.0993387	7.4464	0.601031	1.0005	5.0304	0.0178553	1.09585	5.0304	0.00987025
dd_Smed_v6_3157_0_1	COMMD2	COMM domain-containing protein 2	commd2	COMM domain containing 2	Contig2201	1.14441	7.9015	0.00105756	1.57699	5.14583	1.88e-07	1.35785	5.14583	9.52e-06
dd_Smed_v6_3160_0_1	ACADS	Short-chain specific acyl-CoA dehydrogenase, mitochondrial	zgc:85777	Zgc:85777	Contig4610	1.18869	8.20151	0.000134454	2.29755	5.33654	5.1e-10	2.36114	5.33654	2.02e-10
dd_Smed_v6_3164_0_1	RAB14	Ras-related protein Rab-14	rab14	RAB14, member RAS oncogene family	Contig3296	0.91047	9.58904	0.000665505	1.46955	4.77532	3.55e-06	1.10432	4.77532	0.000712639
dd_Smed_v6_3165_0_1	ABHD4	Protein ABHD4	ABHD4	Protein ABHD4	Contig5428	1.45946	7.54322	0.000180531	1.91227	5.88821	1.22e-12	2.02061	5.88821	7.1e-14
dd_Smed_v6_3174_0_1	MLST8	Target of rapamycin complex subunit LST8	mlst8	Target of rapamycin complex subunit lst8	Contig1647	0.551658	7.85809	0.00500507	1.82199	3.47135	0.000734677	1.44405	3.47135	0.00996048
dd_Smed_v6_3179_0_1	OSBPL2	Oxysterol-binding protein-related protein 2	Osbpl2	Oxysterol-binding protein-related protein 2	Contig7473	1.74017	8.00935	0.00128285	1.92322	6.21156	2.69e-12	1.87025	6.21156	1.24e-11
dd_Smed_v6_3189_0_1	WASF1	Wiskott-Aldrich syndrome protein family member 1	SCAR	SCAR, isoform E	Contig6279	0.270767	6.77922	0.0890146	1.26134	5.21629	2.33e-05	1.22352	5.21629	4.82e-05
dd_Smed_v6_3194_0_1	STK24	Epididymis secretory protein Li 95	STK24	Epididymis secretory protein Li 95	Contig5773	0.349518	6.08438	0.0519304	3.24763	4.26903	3.96e-11	2.96364	4.26903	1.57e-09
dd_Smed_v6_3195_0_1	NA	NA	NA	NA	PL05003A1B03	1.07523	6.6216	0.00213326	1.03042	5.66959	6.77e-05	0.746816	5.66959	0.00593487
dd_Smed_v6_32_0_1	NA	NA	cnfn	Cornifelin homolog	Contig3429	3.70015	13.649	2.29e-05	3.69546	11.8691	4.08e-29	3.60861	11.8691	5.76e-28
dd_Smed_v6_3200_0_1	NA	NA	NA	NA	Contig3280	1.68879	8.27143	0.000122228	2.47107	5.40113	3.14e-18	1.90741	5.40113	1.68e-11
dd_Smed_v6_3208_0_1	CLIC4	Chloride intracellular channel protein 4	Clic	Chloride intracellular channel, isoform A	Contig3691	2.06945	8.20385	8.54e-05	3.99001	5.30463	2.38e-28	3.97832	5.30463	3.56e-28
dd_Smed_v6_3209_0_1	MANBA	Beta-mannosidase	Manba	Beta-mannosidase	PL06005A1E03	0.339658	6.37036	0.0412143	2.93479	4.94239	5.15e-23	2.6611	4.94239	2.32e-19
dd_Smed_v6_3212_0_1	EFR3B	Protein EFR3 homolog B	EFR3B	Protein EFR3 homolog B	PL05006A2G12	0.560726	6.55029	0.0225922	1.18009	4.0536	0.00294586	1.22634	4.0536	0.00220155
dd_Smed_v6_3217_0_1	PYCR3	Pyrroline-5-carboxylate reductase 3	pycr3	Pyrroline-5-carboxylate reductase 3	Contig1084	-0.12912	7.32256	0.360793	1.42205	4.99968	9.63e-06	1.45763	4.99968	6.43e-06
dd_Smed_v6_3236_0_1	SLC30A3	Zinc transporter 3	slc30a8	Solute carrier family 30 (zinc transporter), member 8	Contig3522	1.14338	7.48152	0.00115356	1.63563	4.85348	2.93e-07	1.28167	4.85348	8.14e-05
dd_Smed_v6_324_0_1	NA	NA	NA	NA	Contig819	3.13504	9.67015	2.53e-05	5.91773	8.7609	5.13e-67	5.78728	8.7609	1.03e-64
dd_Smed_v6_3252_0_1	SLC16A12	Monocarboxylate transporter 12	SLC16A12	Monocarboxylate transporter 12	Contig4237	2.37556	9.34325	2.33e-05	3.37344	4.99863	1.63e-22	3.33956	4.99863	4.39e-22
dd_Smed_v6_3254_1_1	NA	NA	NA	NA	Contig112	1.34858	8.25248	0.0012623	3.19932	6.70321	9.76e-28	3.34552	6.70321	7.39e-30
dd_Smed_v6_3267_0_1	RAB10	Ras-related protein Rab-10	rab10	RAB10, member RAS oncogene family	Contig2183	0.485865	7.58271	0.0154288	0.691572	3.65917	0.210903	1.39946	3.65917	0.0055844
dd_Smed_v6_3268_0_1	OSBP2	Oxysterol-binding protein 2	OSBP2	Oxysterol-binding protein 2	Contig4553	0.886488	7.50527	0.00140683	1.53029	4.83998	8.61e-06	1.5352	4.83998	9.23e-06
dd_Smed_v6_3270_0_1	ACOX3	Peroxisomal acyl-coenzyme A oxidase 3	Acox3	Peroxisomal acyl-coenzyme A oxidase 3	Contig4735	0.744245	8.05646	0.00575974	1.61866	3.70708	0.000224783	1.41511	3.70708	0.00161168
dd_Smed_v6_3273_0_1	EPG5	Ectopic P granules protein 5 homolog	Epg5	Ectopic P granules protein 5 homolog	Contig4471	1.07729	7.58399	0.00104291	1.08092	5.60815	0.000650493	0.922855	5.60815	0.0048133
dd_Smed_v6_3277_0_1	ANK1	Ankyrin-1	ANK1	Ankyrin-1	Contig1190	1.51573	7.09942	0.000411435	2.07436	6.17319	6e-09	1.88872	6.17319	1.42e-07
dd_Smed_v6_3286_0_1	MAP3K2	Mitogen-activated protein kinase kinase kinase 2	map3k3	Mitogen-activated protein kinase kinase kinase 3	PL030015A10E04	0.305329	6.3516	0.166335	1.2024	4.72077	0.000124128	1.08548	4.72077	0.000678591
dd_Smed_v6_329_0_1	CTSD	Cathepsin D	cathD	CathD	Contig337	3.54421	11.8981	2.29e-05	3.13978	9.87446	5.2e-22	2.91325	9.87446	2.41e-19
dd_Smed_v6_33_0_1	SFTPA2	Pulmonary surfactant-associated protein A2	hbl4	Hexose-binding lectin 4	Contig3767	-0.246112	10.6584	0.355907	5.53736	9.58325	8.5e-40	5.46784	9.58325	4.94e-39
dd_Smed_v6_3308_0_1	CDA	Cytidine deaminase	Cda	Cytidine deaminase	Contig2152	-0.524642	8.03133	0.0182089	4.44957	4.00792	1.27e-07	4.72182	4.00792	3.25e-08
dd_Smed_v6_3309_0_1	-	cDNA FLJ77654, highly similar to Homo sapiens guanine nucleotide binding protein (G protein), beta polypeptide 4 (GNB4), mRNA	gpb-1	Guanine nucleotide-binding protein subunit beta-1	Contig3938	1.28548	8.93058	7.81e-05	2.60121	3.55231	3.2e-11	2.20472	3.55231	2.02e-08
dd_Smed_v6_3324_0_1	-	Putative uncharacterized protein	inhbab	Inhibin, beta Ab	Contig285	0.188499	6.6774	0.463998	3.59139	6.21119	2.39e-32	3.30743	6.21119	3.67e-28
dd_Smed_v6_3344_0_1	TMEM189	Transmembrane protein 189	TMEM189	Transmembrane protein 189	Contig6417	0.795223	8.03022	0.0199071	1.05098	6.01526	0.000314839	1.12944	6.01526	0.000113665
dd_Smed_v6_335_0_1	CS	Citrate synthase, mitochondrial	cs	Citrate synthase, mitochondrial	Contig507	1.4221	11.7094	0.000108834	1.78072	10.7563	9.56e-08	1.72031	10.7563	3.05e-07
dd_Smed_v6_3352_0_1	RBKS	Ribokinase	rbks	Ribokinase	Contig5178	0.179194	8.57642	0.217709	0.953864	6.84312	0.00164751	1.11388	6.84312	0.000222199
dd_Smed_v6_3361_0_1	PAK1	Serine/threonine-protein kinase PAK 1	pak1	P21 protein (Cdc42/Rac)-activated kinase 1	Contig1629	1.08189	8.12452	0.00445952	2.54072	5.82852	5.67e-19	2.08181	5.82852	2.52e-13
dd_Smed_v6_3362_0_1	RAC1	Ras-related C3 botulinum toxin substrate 1	Rac1	Ras-related C3 botulinum toxin substrate 1	Contig2853	2.39458	11.088	5.33e-05	6.64602	6.29195	4.54e-78	6.64101	6.29195	4.31e-78
dd_Smed_v6_3369_0_1	WASHC5	WASH complex subunit 5	washc5	WASH complex subunit 5	Contig372	1.65572	8.09278	3.95e-05	2.8201	5.77401	8.79e-20	2.38545	5.77401	9.29e-15
dd_Smed_v6_3370_0_1	RAB7A	Ras-related protein Rab-7a	Rab7	CG5915 protein	Contig1543	1.2667	7.22332	0.00437586	1.92531	3.69074	1.9e-06	1.56289	3.69074	0.00014209
dd_Smed_v6_3371_0_1	HSD17B12	Very-long-chain 3-oxoacyl-CoA reductase	HSD17B12	Very-long-chain 3-oxoacyl-CoA reductase	Contig6399	0.875079	8.6346	0.00271784	1.48084	4.84953	5.14e-05	1.47812	4.84953	6.12e-05
dd_Smed_v6_3372_0_1	MROH2B	Maestro heat-like repeat-containing protein family member 2B	Mroh1	MCG134445, isoform CRA_a	PL06017A1F12	0.0932952	6.23624	0.507462	2.27993	5.13203	2.1e-17	2.15389	5.13203	1.1e-15
dd_Smed_v6_3373_0_1	PCYT2	Ethanolamine-phosphate cytidylyltransferase	Pect	Phosphoethanolamine cytidylyltransferase, isoform C	Contig4909	1.32428	8.00706	0.00028636	1.55578	5.04824	5.23e-06	1.55929	5.04824	5.68e-06
dd_Smed_v6_3376_0_1	BPGAP1	BCH domain-containing Cdc42GAP-like protein	BPGAP1	BCH domain-containing Cdc42GAP-like protein	Contig2140	1.17127	7.79482	0.000266655	1.34763	5.53429	2.6e-06	1.42838	5.53429	6.82e-07
dd_Smed_v6_338_0_1	UBA52	Ubiquitin A-52 residue ribosomal protein fusion product 1	ubb	Ubiquitin B	Contig6913	-0.867202	7.6767	0.0299986	5.24592	7.81159	6.08e-56	5.12893	7.81159	4.96e-54
dd_Smed_v6_3397_0_1	NA	NA	CG7222	CG7222, isoform A	Contig6898	0.981006	7.48843	0.0208477	1.09079	5.09661	0.00118782	0.749273	5.09661	0.0382327
dd_Smed_v6_3398_0_1	WDFY3	WD repeat and FYVE domain-containing protein 3	Wdfy3	WD repeat and FYVE domain-containing protein 3	Contig1351	0.962596	7.23332	0.000566652	1.1506	6.31689	0.000145448	1.13149	6.31689	0.000220907
dd_Smed_v6_3401_0_1	HDAC11	Histone deacetylase 11	HDAC11	Histone deacetylase 11, isoform A	Contig2777	0.229792	8.3098	0.286964	1.16808	5.50736	0.000218965	0.821604	5.50736	0.0141785
dd_Smed_v6_3405_0_1	NA	NA	NA	NA	Contig1611	2.14744	8.89565	3.77e-05	2.19789	5.84343	3.09e-11	2.03008	5.84343	9.87e-10
dd_Smed_v6_3416_0_1	MIB1	E3 ubiquitin-protein ligase MIB1	mib1	E3 ubiquitin-protein ligase mib1	Contig4150	0.347721	6.85314	0.0312899	1.73343	5.60602	1.46e-06	1.38663	5.60602	0.000154276
dd_Smed_v6_3432_0_1	SCUBE1	Signal peptide, CUB and EGF-like domain-containing protein 1	SCUBE1	Signal peptide, CUB and EGF-like domain-containing protein 1	Contig2223	1.13172	7.38249	0.00393841	2.11821	3.50238	0.000352086	2.06032	3.50238	0.000594261
dd_Smed_v6_3439_0_1	TMEM41A	Transmembrane protein 41A	tmem41b	Transmembrane protein 41B	Contig5477	-0.0933555	9.13787	0.504423	1.02987	5.40136	0.0021806	1.22101	5.40136	0.000256727
dd_Smed_v6_3440_0_1	NA	NA	NA	NA	Contig948	0.48302	7.99079	0.0141899	1.28466	3.14379	0.00367772	1.24389	3.14379	0.00573333
dd_Smed_v6_3443_0_1	ZFP37	Zinc finger protein 37 homolog	znf408	Zinc finger protein 408	Contig1854	0.812507	9.355	0.00304714	1.72938	4.34007	2.05e-07	1.99635	4.34007	2.11e-09
dd_Smed_v6_3452_0_1	NA	NA	NA	NA	Contig1289	-0.206831	7.40638	0.211043	4.59732	3.948	2.46e-28	4.81311	3.948	1.87e-30
dd_Smed_v6_3455_0_1	NA	NA	CELE_Y59A8B.21	Uncharacterized protein	Contig2273	-1.00533	9.30877	0.00241218	2.29119	6.17844	2.41e-12	2.54939	6.17844	9.34e-15
dd_Smed_v6_3484_0_1	MPPED1	Metallophosphoesterase domain-containing protein 1	MPPED1	Metallophosphoesterase domain-containing protein 1	Contig3655	0.800183	7.67254	0.00148411	0.902159	4.94023	0.00379524	1.16771	4.94023	0.000137143
dd_Smed_v6_3487_0_1	RNF7	RING-box protein 2	RNF7	RING-box protein 2	Contig6661	0.073381	7.15804	0.468866	1.13977	4.03971	0.00966637	0.975471	4.03971	0.0338278
dd_Smed_v6_3493_1_1	DLG1	Disks large homolog 1	dlg4	Disks large homolog 4	Contig4256	0.540264	7.25455	0.0666616	1.18873	6.05411	1.77e-05	0.812879	6.05411	0.00524898
dd_Smed_v6_3507_0_1	PRELID1	PRELI domain-containing protein 1, mitochondrial	Prelid1	PRELI domain-containing protein 1, mitochondrial	Contig1324	0.710402	7.41701	0.00513414	1.08238	5.31449	0.000589405	1.02858	5.31449	0.00132043
dd_Smed_v6_3508_0_1	SLC28A3	Solute carrier family 28 member 3	Slc28a3	Solute carrier family 28 member 3	Contig3413	2.73974	8.6929	2.61e-05	5.36191	5.99382	8.4e-41	4.94457	5.99382	4.61e-36
dd_Smed_v6_3512_0_1	DHRS7B	Dehydrogenase/reductase SDR family member 7B	Dhrs7b	Dehydrogenase/reductase SDR family member 7B	Contig6298	0.381637	7.62837	0.0908428	1.10877	4.75207	0.000775459	1.2029	4.75207	0.000274755
dd_Smed_v6_3520_0_1	DSCR3	Down syndrome critical region protein 3	Dscr3	Down syndrome critical region protein 3 homolog	Contig960	0.836322	8.80952	0.00137378	1.25897	5.35709	5.68e-05	1.18794	5.35709	0.000176059
dd_Smed_v6_3535_0_1	MRPS18B	28S ribosomal protein S18b, mitochondrial	mRpS18B	LP10852p	Contig768	0.206565	8.40493	0.134283	1.25348	4.35329	0.000207157	0.736483	4.35329	0.0461221
dd_Smed_v6_354_0_1	TSPAN3	Tetraspanin-3	Tspan3	Tetraspanin-3	Contig2538	3.22906	10.6912	0.00010358	5.34816	11.3937	9.52e-45	5.18253	11.3937	1.13e-42
dd_Smed_v6_3546_0_1	THOP1	Thimet oligopeptidase 1	THOP1	Thimet oligopeptidase 1	PL06011A2D06	-0.137948	6.22112	0.575615	1.04051	6.32999	0.000362049	1.30087	6.32999	7.03e-06
dd_Smed_v6_3557_0_1	NA	NA	NA	NA	Contig2154	0.0730438	7.43283	0.260219	1.22675	4.16496	0.00210154	1.08291	4.16496	0.0085009
dd_Smed_v6_3560_0_1	DDO	D-aspartate oxidase	CG11236	GH12548p	Contig2251	1.23638	7.71476	0.000961763	4.38029	6.80606	1.07e-25	4.5197	6.80606	6.28e-27
dd_Smed_v6_3562_0_1	TRAF6	TNF receptor-associated factor 6	traf3	TNF receptor-associated factor 3	Contig4866	1.62646	7.58137	0.000118251	1.98379	4.35592	1.38e-07	2.21658	4.35592	4.48e-09
dd_Smed_v6_3565_0_1	RUNX1	Runt-related transcription factor 1	runx2a	Runx2a splice form 4	Contig1091	-0.0588131	6.71552	0.671061	2.23985	2.51784	5.28e-05	1.67275	2.51784	0.00337112
dd_Smed_v6_3569_0_1	NA	NA	NA	NA	Contig991	0.442728	8.26876	0.0504037	2.34507	2.57693	8.65e-05	1.47294	2.57693	0.0193913
dd_Smed_v6_3575_0_1	RBMS1	RNA-binding motif, single-stranded-interacting protein 1	elav	Protein elav	Contig4307	1.67036	8.09422	0.00011543	2.21113	4.46434	5.96e-15	1.93947	4.46434	8.52e-12
dd_Smed_v6_3578_0_1	SLC15A4	Solute carrier family 15 member 4	SLC15A4	Solute carrier family 15 member 4	Contig1439	2.353	7.66251	0.000163308	7.39823	3.59028	7.41e-21	7.28528	3.59028	2.38e-20
dd_Smed_v6_3592_0_1	PLA2G15	Group XV phospholipase A2	PLA2G15	Group XV phospholipase A2	Contig1798	2.43077	8.5824	3.61e-05	3.5615	4.64772	8.46e-23	3.36352	4.64772	1.13e-20
dd_Smed_v6_3596_0_1	SLC25A11	Mitochondrial 2-oxoglutarate/malate carrier protein	misc-1	MItochondrial Solute Carrier	Contig2532	0.506023	7.91071	0.0100815	1.66384	3.51301	0.00116415	1.52758	3.51301	0.00352328
dd_Smed_v6_3599_0_1	PIK3CB	Phosphatidylinositol 4,5-bisphosphate 3-kinase catalytic subunit beta isoform	Pik3cb	Phosphatidylinositol 4,5-bisphosphate 3-kinase catalytic subunit beta isoform	Contig4261	0.107638	6.28218	0.479654	1.21197	4.30652	0.000134479	0.91416	4.30652	0.00586429
dd_Smed_v6_3602_0_1	APMAP	Adipocyte plasma membrane-associated protein	apmap	Adipocyte plasma membrane-associated protein	Contig2304	1.00774	8.37017	0.00720289	3.88378	4.60169	5.01e-09	3.82703	4.60169	9.43e-09
dd_Smed_v6_3604_0_1	MIB1	E3 ubiquitin-protein ligase MIB1	MIB1	E3 ubiquitin-protein ligase MIB1	Contig4146	1.42003	7.10973	0.00516757	1.94752	4.62211	2.6e-08	1.71991	4.62211	1.09e-06
dd_Smed_v6_3611_0_1	ABCD1	ATP-binding cassette sub-family D member 1	ABCD1	ATP-binding cassette sub-family D member 1	Contig2577	1.76058	7.9434	6.06e-05	2.25984	5.85896	3.09e-18	1.98175	5.85896	2.18e-14
dd_Smed_v6_3616_0_1	MCOLN2	Mucolipin-2	Trpml	SD02261p	PL06014B2E11	0.644961	6.85249	0.00696577	2.86827	5.37219	1.76e-20	2.902	5.37219	7.54e-21
dd_Smed_v6_3632_0_1	TNXB	Tenascin-X	Tnx	Tenascin-X	Contig505	3.90745	11.7722	4.9e-05	5.65803	8.55818	2e-53	5.36545	8.55818	2.1e-49
dd_Smed_v6_3638_0_1	KLF13	Krueppel-like factor 13	cbt	Cabut, isoform B	Contig3093	0.41776	8.47344	0.0317406	2.18316	4.10063	3.86e-07	2.01296	4.10063	3.39e-06
dd_Smed_v6_3650_0_1	TRAF5	TNF receptor-associated factor 5	TRAF5	TNF receptor-associated factor 5	Contig407	1.82055	8.52064	3.8e-05	2.49156	6.18975	1.59e-20	2.3135	6.18975	5.86e-18
dd_Smed_v6_366_0_1	PGD	6-phosphogluconate dehydrogenase, decarboxylating	PGD	6-phosphogluconate dehydrogenase, decarboxylating	Contig1749	1.59772	11.6765	0.000149482	2.23396	8.04867	4.6e-10	2.07877	8.04867	7.67e-09
dd_Smed_v6_3667_0_1	MST4	Serine/threonine protein kinase MST4	MST4	Serine/threonine protein kinase MST4	Contig4602	0.735136	8.76252	0.00892205	1.59872	6.89196	7.66e-08	1.38846	6.89196	3.94e-06
dd_Smed_v6_3672_0_1	TSPO	Translocator protein	TSPO	Translocator protein	Contig310	-0.232342	8.32695	0.276242	1.33121	5.61798	6.06e-07	1.26946	5.61798	2.39e-06
dd_Smed_v6_3673_0_1	AGMO	Alkylglycerol monooxygenase	Agmo	Alkylglycerol monooxygenase	Contig4154	2.68188	9.08241	2.76e-05	3.88192	7.87452	5.58e-40	3.81615	7.87452	7.47e-39
dd_Smed_v6_3685_0_1	MARK2	Serine/threonine-protein kinase MARK2	par-1	Par-1, isoform W	PL06011A1F01	-0.0280095	5.89455	0.39527	0.772359	5.01617	0.0212782	1.00847	5.01617	0.00213635
dd_Smed_v6_3689_0_1	NA	NA	NA	NA	Contig3663	2.81957	9.22364	2.29e-05	6.3573	6.89822	9.83e-65	6.20946	6.89822	2.16e-62
dd_Smed_v6_3693_0_1	ANKRD52	Serine/threonine-protein phosphatase 6 regulatory ankyrin repeat subunit C	ANKRD52	Serine/threonine-protein phosphatase 6 regulatory ankyrin repeat subunit C	Contig4824	-0.0817692	6.3596	0.668715	0.847386	5.94838	0.00629069	1.10373	5.94838	0.000284987
dd_Smed_v6_370_0_1	TFPI2	Tissue factor pathway inhibitor 2	Wfdc6b	WAP four-disulfide core domain protein 6B	Contig7333	-1.3636	9.00258	0.0088952	4.12271	9.13182	1.06e-23	6.56403	9.13182	4.24e-47
dd_Smed_v6_3706_0_1	TRAF3	TNF receptor-associated factor 3	TRAF3	TNF receptor-associated factor 3	Contig52	0.680472	7.15845	0.01071	1.17197	5.81654	0.000168542	0.98115	5.81654	0.0022426
dd_Smed_v6_3711_0_1	PRKACB	cAMP-dependent protein kinase catalytic subunit beta	Prkacb	cAMP-dependent protein kinase catalytic subunit beta	Contig892	1.4153	8.41289	0.00197097	6.25488	4.90196	5.13e-55	6.22882	4.90196	1.33e-54
dd_Smed_v6_3712_0_1	SQSTM1	Sequestosome-1	Dytn	Dystrotelin	PL030015A10F05	1.70886	8.07752	0.00126701	1.59631	5.19224	1.46e-06	1.61132	5.19224	1.33e-06
dd_Smed_v6_3713_0_1	CNIH1	Protein cornichon homolog 1	CNIH1	Protein cornichon homolog 1	Contig2813	0.103576	8.82148	0.484845	1.01274	5.61035	0.000587658	1.12952	5.61035	0.000125142
dd_Smed_v6_3727_0_1	NA	NA	NA	NA	Contig3262	1.14656	8.68671	0.000297149	1.59981	5.35867	1.2e-07	1.59994	5.35867	1.39e-07
dd_Smed_v6_3728_0_1	KLK13	Kallikrein-13	KLK13	Kallikrein-13	Contig2396	-0.725629	7.50281	0.0477699	7.17688	5.6549	3.02e-36	3.71991	5.6549	1.8e-13
dd_Smed_v6_3737_0_1	ARHGAP25	Rho GTPase-activating protein 25	Plekhd1	Pleckstrin homology domain-containing family D member 1	PL06022B2B05	0.424986	6.39018	0.020166	1.42177	4.85577	3.19e-06	0.950816	4.85577	0.00289399
dd_Smed_v6_3738_0_1	NA	NA	NA	NA	PL05001B2A12	0.474327	7.53434	0.0390757	1.05587	4.14246	0.00809271	0.954119	4.14246	0.0205304
dd_Smed_v6_3754_0_1	ELMO2	Engulfment and cell motility protein 2	ELMO2	Engulfment and cell motility protein 2	Contig1935	1.13204	7.70939	0.000257318	1.10134	5.54931	0.00015658	1.18934	5.54931	4.68e-05
dd_Smed_v6_3769_0_1	RABGGTB	Geranylgeranyl transferase type-2 subunit beta	rabggtb	Rab geranylgeranyltransferase, beta subunit	PL06021A1G10	0.253462	7.85129	0.202568	2.32406	2.17021	0.00602759	2.33275	2.17021	0.00661256
dd_Smed_v6_377_0_1	CACYBP	Calcyclin-binding protein	Cacybp	Calcyclin-binding protein	Contig2283	-0.00355216	7.16861	0.757234	1.16679	5.12372	0.00718571	1.28984	5.12372	0.00302881
dd_Smed_v6_3770_0_1	IDH1	Isocitrate dehydrogenase [NADP] cytoplasmic	Idh1	Isocitrate dehydrogenase [NADP] cytoplasmic	Contig2219	0.0496086	8.05769	0.686225	2.70498	6.30108	7.13e-19	2.7635	6.30108	1.56e-19
dd_Smed_v6_3794_0_1	PANK1	Pantothenate kinase 1	fbl	Fumble, isoform F	Contig5175	2.23037	8.17955	5.98e-05	6.07571	5.67945	1.91e-44	5.81884	5.67945	1.11e-41
dd_Smed_v6_3795_0_1	NA	NA	NA	NA	Contig5226	0.430993	6.54435	0.0101504	2.13328	5.60716	7.05e-12	2.02951	5.60716	7.94e-11
dd_Smed_v6_3804_0_1	ACOX3	Peroxisomal acyl-coenzyme A oxidase 3	acox3	Acyl-coenzyme A oxidase	Contig905	1.59734	8.69411	0.000239303	2.59904	4.58872	5.03e-09	2.56414	4.58872	9.43e-09
dd_Smed_v6_3808_0_1	RGN	Regucalcin	Rgn	Regucalcin	Contig6410	-0.0443018	6.80561	0.80917	2.42306	5.21407	3.38e-07	2.55625	5.21407	9.04e-08
dd_Smed_v6_3811_0_1	NA	NA	NA	NA	Contig2840	0.644241	8.94991	0.0163313	1.37415	5.23909	9.53e-07	1.25065	5.23909	1.04e-05
dd_Smed_v6_3817_0_1	DDX3Y	ATP-dependent RNA helicase DDX3Y	ddx3a	DEAD (Asp-Glu-Ala-Asp) box helicase 3a	Contig4698	0.953881	8.14483	0.000528511	1.28497	5.11051	1.98e-05	1.11035	5.11051	0.000298728
dd_Smed_v6_3820_0_1	NA	NA	NA	NA	Contig195	0.885107	6.92587	0.00196403	1.38868	6.28636	9e-06	1.25532	6.28636	7.53e-05
dd_Smed_v6_3821_0_1	SLC2A4RG	SLC2A4 regulator	Glut4EF	Glut4EF, isoform G	Contig3306	2.78908	8.15807	3.98e-05	4.09929	5.80063	4.05e-34	4.15679	5.80063	7.3e-35
dd_Smed_v6_3824_0_1	SERPINB13	Serpin B13	Serpinb3a	Serine (Or cysteine) peptidase inhibitor, clade B (Ovalbumin), member 3A	Contig6228	0.870433	8.82863	0.0280488	1.07394	6.56819	0.000247214	0.806388	6.56819	0.00874986
dd_Smed_v6_3825_1_1	NA	NA	NA	NA	Contig2424	0.843242	7.9139	0.000931478	1.04414	5.07562	0.00124475	1.01585	5.07562	0.00199729
dd_Smed_v6_3838_0_1	PRKX	cAMP-dependent protein kinase catalytic subunit PRKX	PRKX	cAMP-dependent protein kinase catalytic subunit PRKX	Contig6448	1.24158	8.7418	0.000862276	1.48891	5.25114	4.13e-05	1.15224	5.25114	0.00213527
dd_Smed_v6_3842_2_1	PITHD1	PITH domain-containing protein 1	CG6153	PITH domain-containing protein CG6153	Contig5009	-0.000913133	7.65731	0.621286	1.59341	4.12652	8.56e-07	1.53863	4.12652	2.39e-06
dd_Smed_v6_3869_0_1	NA	NA	NA	NA	PL06019B2B02	0.334314	7.14715	0.0535576	1.12537	5.96806	0.00015403	0.776311	5.96806	0.0139759
dd_Smed_v6_3874_0_1	SLC30A1	Zinc transporter 1	SLC30A1	Zinc transporter 1	Contig4558	0.550147	8.16284	0.00394013	1.4043	3.71354	0.000403151	1.26893	3.71354	0.00174886
dd_Smed_v6_388_0_1	DNM1L	Dynamin-1-like protein	DNM1L	Dynamin-1-like protein	Contig6476	3.0519	9.48558	0.00182368	2.37389	8.01078	1.86e-09	2.22357	8.01078	2.08e-08
dd_Smed_v6_3889_0_1	RAB4B	Ras-related protein Rab-4B	Rab10	LD39986p	Contig3665	2.09548	9.20143	5.89e-05	2.47847	4.80438	1.5e-14	2.56677	4.80438	2.12e-15
dd_Smed_v6_390_0_1	PSAP	Prosaposin	PSAP	Prosaposin	Contig332	1.27978	6.82418	0.000337725	1.84271	3.78836	3.88e-06	2.5358	3.78836	2.2e-10
dd_Smed_v6_3900_1_1	NA	NA	NA	NA	PL030007A20H07	-0.00480171	6.88292	0.505807	1.04447	4.8514	0.000509648	0.855147	4.8514	0.00614023
dd_Smed_v6_3903_0_1	ADA	Adenosine deaminase	ada	Adenosine deaminase	Contig7357	1.89274	8.35334	0.00068152	2.30415	5.04972	6.07e-13	2.15873	5.04972	1.7e-11
dd_Smed_v6_3906_0_1	OTC	Ornithine carbamoyltransferase, mitochondrial	OTC	Ornithine carbamoyltransferase, mitochondrial	Contig4817	-0.691555	8.29408	0.00377558	1.58608	5.22386	5.98e-06	1.68551	5.22386	1.64e-06
dd_Smed_v6_391_0_1	NA	NA	NA	NA	Contig3732	3.09008	11.7935	2.29e-05	3.35331	10.2229	1.73e-24	3.39363	10.2229	6.06e-25
dd_Smed_v6_3922_0_1	ARHGAP44	Rho GTPase-activating protein 44	ARHGAP44	Rho GTPase-activating protein 44	PL05005B2G08	1.03597	7.96983	0.00192594	0.926213	4.87601	0.00395491	1.12119	4.87601	0.000421621
dd_Smed_v6_3925_0_1	DTNBP1	Dysbindin	Dysb	Dysbindin protein homolog	PL04018A1A03	1.63187	8.29807	0.000686946	1.97732	2.71791	0.00983457	2.12643	2.71791	0.00596189
dd_Smed_v6_3933_1_1	NA	NA	NA	NA	Contig5292	0.740547	7.88361	0.000761111	1.99896	3.67261	9.82e-05	1.26354	3.67261	0.0202439
dd_Smed_v6_3945_0_1	NA	NA	NA	NA	Contig1674	1.14404	7.04771	0.00019125	3.45895	4.13653	6.64e-16	3.35424	4.13653	4.57e-15
dd_Smed_v6_3947_0_1	MTRR	Methionine synthase reductase	Mtrr	Methionine synthase reductase	PL05004A2F08	0.542489	7.59215	0.0173063	1.49351	6.14786	1.83e-07	1.54941	6.14786	7.01e-08
dd_Smed_v6_3948_0_1	ACSS3	Acyl-CoA synthetase short-chain family member 3, mitochondrial	ACSS3	Acyl-CoA synthetase short-chain family member 3, mitochondrial	Contig1873	0.117776	7.89513	0.440805	1.64634	4.49388	1.34e-07	1.64892	4.49388	1.47e-07
dd_Smed_v6_3949_0_1	ZNF547	Trafficking protein particle complex 2, isoform CRA_a	ZNF547	Trafficking protein particle complex 2, isoform CRA_a	Contig1877	0.586423	6.8274	0.0145315	0.966047	4.38126	0.00936254	1.07341	4.38126	0.00389591
dd_Smed_v6_3959_0_1	PFKFB1	6-phosphofructo-2-kinase/fructose-2,6-bisphosphatase 1	pfkfb1	6-phosphofructo-2-kinase/fructose-2,6-biphosphatase 1	Contig4668	0.64985	7.53366	0.00142608	1.83692	4.24033	5.7e-08	1.66875	4.24033	1e-06
dd_Smed_v6_396_0_1	PSAP	Prosaposin	PSAP	Prosaposin	Contig4121	2.77604	8.1274	0.000273669	5.38395	3.68351	1.76e-18	5.17055	3.68351	2.43e-17
dd_Smed_v6_3969_0_1	VPS33A	Vacuolar protein sorting-associated protein 33A	vps33a	Vacuolar protein sorting 33A	Contig4757	0.358463	6.73333	0.0199005	1.31977	4.43504	1.27e-05	1.21039	4.43504	7.76e-05
dd_Smed_v6_398_0_1	ALDOC	Fructose-bisphosphate aldolase C	Ald	Fructose-bisphosphate aldolase	Contig1821	-0.359644	9.92307	0.0243505	1.52732	9.04468	6.57e-06	1.72414	9.04468	3.85e-07
dd_Smed_v6_3982_0_1	ABCC1	Multidrug resistance-associated protein 1	Abcc1	Multidrug resistance-associated protein 1	Contig6219	2.06235	7.73946	0.000975457	5.95201	5.20279	3.79e-16	6.20766	5.20279	4.6e-17
dd_Smed_v6_3983_0_1	MSRA	Mitochondrial peptide methionine sulfoxide reductase	Msra	Mitochondrial peptide methionine sulfoxide reductase	Contig2001	0.458294	6.78094	0.0115529	1.88527	4.39344	6.08e-07	1.91064	4.39344	4.95e-07
dd_Smed_v6_3998_0_1	HACD3	Very-long-chain (3R)-3-hydroxyacyl-CoA dehydratase 3	CG9267-RA	Very-long-chain (3R)-3-hydroxyacyl-CoA dehydratase	Contig1151	-0.291034	7.8029	0.502984	1.40759	4.78411	0.00294644	1.48505	4.78411	0.00186647
dd_Smed_v6_3999_0_1	INPP4B	Type II inositol 3,4-bisphosphate 4-phosphatase	Inpp4b	Inositol polyphosphate 4-phosphatase type II alpha isoform	Contig3086	0.890505	6.81717	0.00623755	2.14049	4.49063	7.55e-13	1.77352	4.49063	3.49e-09
dd_Smed_v6_400_0_1	ALDH2	Aldehyde dehydrogenase, mitochondrial	Aldh2	Aldehyde dehydrogenase, mitochondrial	Contig1973	0.0174598	9.84419	0.0176045	2.6129	9.4211	1.34e-16	2.42213	9.4211	1.62e-14
dd_Smed_v6_4001_0_1	RAB18	Ras-related protein Rab-18	rab18b	Ras-related protein Rab-18-B	Contig2069	0.59393	7.53512	0.0571404	1.13719	4.8116	8.42e-05	0.821906	4.8116	0.00685192
dd_Smed_v6_4003_0_1	NUCB1	Nucleobindin-1	nucb1	Nucleobindin 1	Contig2769	0.724942	7.41808	0.00324731	2.47216	4.67572	3.63e-16	1.94944	4.67572	1.31e-10
dd_Smed_v6_4008_0_1	PCYT1B	Choline-phosphate cytidylyltransferase B	Pcyt2	CTP:phosphocholine cytidylyltransferase 2	Contig1692	0.735031	6.87958	0.000824224	1.02556	3.83397	0.00837631	0.66878	3.83397	0.118436
dd_Smed_v6_4014_0_1	DDHD2	Phospholipase DDHD2	PAPLA1	Phosphatidic acid phospholipase A1, isoform B	PL030003B20G11	0.00746375	6.17677	0.435191	1.27002	5.02674	1.58e-05	1.11281	5.02674	0.000201748
dd_Smed_v6_402_1_1	NA	NA	NA	NA	Contig370	1.25845	10.1277	0.00111226	1.80241	7.65165	1.67e-08	2.00266	7.65165	4.17e-10
dd_Smed_v6_4043_0_1	EXOC8	Exocyst complex component 8	exoc8	Exocyst complex component 8	Contig3995	0.890102	8.09	0.00100689	1.07322	4.06606	0.00165605	1.21129	4.06606	0.000372562
dd_Smed_v6_4050_0_1	SGPP1	Sphingosine-1-phosphate phosphatase 1	SGPP1	Sphingosine-1-phosphate phosphatase 1	Contig4379	0.143549	8.59	0.461256	1.91544	3.59904	0.000277434	1.58676	3.59904	0.00337227
dd_Smed_v6_4056_0_1	GLB1	Beta-galactosidase	Glb1	Beta-galactosidase	Contig6905	2.38316	9.25414	0.000849879	2.34483	6.76605	7.83e-19	2.10394	6.76605	1.71e-15
dd_Smed_v6_4076_1_1	CLCN3	H(+)/Cl(-) exchange transporter 3	ClC-c	Chloride channel protein	PL05003A2G04	1.14804	8.26605	0.000899574	1.82244	5.21063	1.07e-08	1.65151	5.21063	2.74e-07
dd_Smed_v6_4081_0_1	ABCG2	ATP-binding cassette sub-family G member 2	w	Protein white	Contig7488	1.6463	8.05705	0.00391447	5.47938	6.27934	3.46e-64	5.2609	6.27934	2.89e-60
dd_Smed_v6_4090_0_1	TMPRSS11D	Transmembrane protease serine 11D	Prss52	Serine protease 52	Contig250	2.13371	9.0688	5.16e-05	4.47191	4.21836	1e-08	4.26789	4.21836	4.4e-08
dd_Smed_v6_41_0_1	TFPI	Tissue factor pathway inhibitor	Spint3	Putative uncharacterized protein	Contig3254	-0.870229	11.4303	0.0182759	6.74756	9.77799	4.38e-17	8.32976	9.77799	2.03e-22
dd_Smed_v6_4108_0_1	CD180	CD180 antigen	CD180	CD180 antigen	Contig6212	0.346978	7.02112	0.0823077	1.09593	3.83461	0.00531316	0.947375	3.83461	0.0203815
dd_Smed_v6_4116_0_1	STARD7	StAR-related lipid transfer protein 7, mitochondrial	STARD7	StAR-related lipid transfer protein 7, mitochondrial	Contig1841	0.389172	7.45183	0.13061	1.17687	4.94332	0.000632025	0.952474	4.94332	0.00789049
dd_Smed_v6_4120_0_1	INHBE	Inhibin beta E chain	LOC100329520	Uncharacterized protein	Contig4428	1.56	7.44056	0.00016452	2.40578	5.2213	7.94e-14	2.15569	5.2213	2.27e-11
dd_Smed_v6_413_0_1	MBOAT2	Lysophospholipid acyltransferase 2	oys	Oysgedart, isoform A	Contig5235	2.86388	10.7555	2.29e-05	4.61684	5.64846	1.76e-13	4.55966	5.64846	3.65e-13
dd_Smed_v6_4132_0_1	BACE1	Beta-secretase 1	Bace1	Beta-secretase 1	Contig5988	0.515113	7.13755	0.0412828	1.63423	4.83725	6.19e-07	1.274	4.83725	0.000140591
dd_Smed_v6_4148_0_1	TRAF2	TNF receptor-associated factor 2	TRAF2	TNF receptor-associated factor 2	PL05005B2B04	2.22524	8.02832	0.00064886	3.0288	3.96701	5.87e-15	3.07057	3.96701	2.96e-15
dd_Smed_v6_4154_0_1	GPC4	Glypican-4	gpc1	Glypican-1	Contig5616	0.0356326	6.51107	0.626868	1.03253	5.54122	0.000391599	1.1275	5.54122	0.000110739
dd_Smed_v6_4170_0_1	STK25	Serine/threonine-protein kinase 25	stk25a	Zgc:92836	Contig2289	0.855884	7.09648	0.0022326	1.86227	4.1112	3.78e-07	2.04679	4.1112	2.59e-08
dd_Smed_v6_4175_0_1	NA	NA	NA	NA	PL06016A2H10	0.17009	6.41595	0.252061	2.38923	5.30438	6.47e-15	2.08773	5.30438	9.89e-12
dd_Smed_v6_4178_0_1	WDR45B	WD repeat domain phosphoinositide-interacting protein 3	Wdr45b	WD repeat domain phosphoinositide-interacting protein 3	Contig186	1.22018	7.615	0.000211592	1.69292	4.20426	1.93e-05	1.60161	4.20426	6.31e-05
dd_Smed_v6_4182_0_1	SPG21	Maspardin	SPG21	Maspardin	PL05005A2D06	0.768313	8.44447	0.0102911	1.01677	4.49977	0.00113221	1.36778	4.49977	8.65e-06
dd_Smed_v6_4183_0_1	WASHC4	WASH complex subunit 4	si:dkey-23p11.2	Si:dkey-23p11.2	Contig4247	0.105435	5.8786	0.569929	2.10664	5.87456	1.96e-12	1.97623	5.87456	4.71e-11
dd_Smed_v6_4184_0_1	ENTPD1	Ectonucleoside triphosphate diphosphohydrolase 1	entpd1	Ectonucleoside triphosphate diphosphohydrolase 1	Contig356	0.596217	7.27056	0.00306684	1.36982	4.98076	0.000210496	1.1063	4.98076	0.00381982
dd_Smed_v6_4187_0_1	RNF185	E3 ubiquitin-protein ligase RNF185	Rnf185	E3 ubiquitin-protein ligase RNF185	Contig526	0.164662	8.50214	0.349745	1.09702	4.64914	0.0195087	1.33501	4.64914	0.00413335
dd_Smed_v6_419_0_1	RAB7A	Ras-related protein Rab-7a	Rab7a	Ras-related protein Rab-7a	Contig1170	1.79274	10.0733	5.38e-05	1.04651	8.03698	0.000178952	0.936271	8.03698	0.0010403
dd_Smed_v6_4190_0_1	GRAP	GRB2-related adapter protein	Grap	GRB2-related adapter protein	Contig2246	0.245993	8.39959	0.150297	1.06377	4.868	0.000488932	0.945856	4.868	0.00251234
dd_Smed_v6_4193_0_1	SVIL	Supervillin	SVIL	Supervillin	PL04009A1F04	0.881495	7.86441	0.00548893	1.13067	4.80664	0.00211748	1.27011	4.80664	0.000554001
dd_Smed_v6_4195_0_1	NA	NA	NA	NA	Contig3416	1.83748	7.61491	0.000620838	2.50819	5.26438	5.13e-12	2.36475	5.26438	8.35e-11
dd_Smed_v6_4198_0_1	SGK3	Serine/threonine-protein kinase Sgk3	sgk3	Serum/glucocorticoid-regulated kinase family, member 3	Contig667	1.31933	7.34709	0.000294147	3.88467	5.6734	3.51e-16	3.77918	5.6734	1.96e-15
dd_Smed_v6_42_0_1	NA	NA	NA	NA	Contig1532	-0.0786632	8.01195	0.417573	5.22356	11.3278	8.4e-41	5.19152	11.3278	2.08e-40
dd_Smed_v6_4201_0_1	PDP2	[Pyruvate dehydrogenase [acetyl-transferring]]-phosphatase 2, mitochondrial	Pdp	GM14286p	Contig2217	0.712662	7.55551	0.00100391	0.851137	3.31566	0.0533191	1.21735	3.31566	0.00419268
dd_Smed_v6_4206_0_1	PREP	Prolyl endopeptidase	PREP	Prolyl endopeptidase	PL06014B2H03	0.171111	6.21745	0.246666	1.00795	5.04593	0.000729918	1.40765	5.04593	1.6e-06
dd_Smed_v6_4212_0_1	NA	NA	NA	NA	Contig2236	-0.882133	7.2363	0.00116086	5.47313	7.4904	2.81e-58	6.25462	7.4904	5.55e-70
dd_Smed_v6_4213_0_1	NA	NA	-	UPF0764 protein C16orf89 homolog	Contig644	-0.449658	7.64556	0.076542	1.49907	5.42731	8.86e-07	0.740108	5.42731	0.0262669
dd_Smed_v6_4219_0_1	UBE2D3	Ubiquitin-conjugating enzyme E2 D3	Ube2d2b	Ubiquitin-conjugating enzyme E2 D2B	Contig1171	0.139526	9.24428	0.437359	1.27189	4.47258	0.00294586	1.35672	4.47258	0.00162094
dd_Smed_v6_423_0_1	CSTA	Cystatin-A	Csta	Cystatin-A	Contig7451	1.52504	8.98171	0.0139608	2.04895	8.06094	5.93e-08	1.93835	8.06094	3.46e-07
dd_Smed_v6_4236_0_1	UBR2	E3 ubiquitin-protein ligase UBR2	ubr2	Ubiquitin protein ligase E3 component n-recognin 2	Contig5258	0.761585	7.82628	0.000944337	1.21885	5.18002	1.55e-05	1.13547	5.18002	7.01e-05
dd_Smed_v6_4253_0_1	ARHGAP35	Rho GTPase-activating protein 35	RhoGAPp190	Rho GTPase-activating protein 190	PL06004A2H07	0.689228	6.62006	0.0128128	1.50781	5.63445	5.7e-06	1.78486	5.63445	7.69e-08
dd_Smed_v6_4259_0_1	MAP3K4	Mitogen-activated protein kinase kinase kinase 4	MAP3K4	Mitogen-activated protein kinase kinase kinase 4	Contig4255	1.5008	7.64546	0.0276997	6.20206	5.36099	1.77e-43	6.5023	5.36099	1.51e-46
dd_Smed_v6_4260_0_1	MAT2B	Methionine adenosyltransferase 2 subunit beta	Mat2b	Methionine adenosyltransferase 2 subunit beta	Contig5929	0.123438	7.65127	0.319174	1.40214	4.06837	1.52e-05	1.21492	4.06837	0.000232213
dd_Smed_v6_4270_0_1	GLTPD1	Ceramide-1-phosphate transfer protein	cptp	Ceramide-1-phosphate transfer protein	Contig3552	0.576866	7.47645	0.00565374	1.286	4.60565	6.11e-05	0.705014	4.60565	0.0454136
dd_Smed_v6_4278_0_1	SOAT1	Sterol O-acyltransferase 1	Soat1	Sterol O-acyltransferase 1	Contig2569	1.02076	7.99557	0.000312217	2.87808	7.11942	4.06e-26	2.67135	7.11942	6.63e-23
dd_Smed_v6_4285_0_1	NA	NA	CELE_Y59A8B.21	Uncharacterized protein	PL05001A1F08	1.22088	7.95594	0.00158069	0.983753	5.63673	0.000480218	1.03064	5.63673	0.000274661
dd_Smed_v6_4286_0_1	TEX2	Testis-expressed protein 2	TEX2	Testis-expressed protein 2	PL06017B2H11	0.0946863	6.28098	0.482992	2.00694	4.11917	3.29e-07	2.10069	4.11917	1.04e-07
dd_Smed_v6_4287_0_1	NA	NA	NA	NA	Contig6094	1.16296	8.15163	0.00445731	3.02262	5.55906	5.89e-25	2.98731	5.55906	1.99e-24
dd_Smed_v6_4288_0_1	NA	NA	NA	NA	Contig6213	0.613411	8.31557	0.00481998	1.08469	6.53582	9.73e-05	0.869804	6.53582	0.00254229
dd_Smed_v6_4290_0_1	SLC6A5	Sodium- and chloride-dependent glycine transporter 2	Slc6a5	Sodium- and chloride-dependent glycine transporter 2	Contig4940	1.16325	6.85224	0.00107939	5.45691	3.54223	1.68e-18	5.14577	3.54223	6.88e-17
dd_Smed_v6_4292_0_1	NA	NA	NA	NA	Contig7292	0.452436	7.04574	0.108402	1.61707	4.17785	1.25e-05	1.22968	4.17785	0.00125182
dd_Smed_v6_4297_0_1	RAB6B	Ras-related protein Rab-6B	RAB6B	Ras-related protein Rab-6B	Contig1300	0.856484	8.34577	0.00145801	1.37747	5.34382	7.45e-05	1.21916	5.34382	0.000584382
dd_Smed_v6_4305_0_1	LDAH	Lipid droplet-associated hydrolase	Ldah	Lipid droplet-associated hydrolase	Contig5294	1.05429	7.48845	0.000348714	2.68843	4.46084	1.73e-12	2.44352	4.46084	1.45e-10
dd_Smed_v6_4309_0_1	MPP2	MAGUK p55 subfamily member 2	mpp2a	Membrane protein, palmitoylated 2a (MAGUK p55 subfamily member 2)	Contig3274	0.752069	6.27394	0.00266575	1.50368	4.52545	2.65e-06	1.28135	4.52545	8.28e-05
dd_Smed_v6_4312_0_1	PLSCR1	Phospholipid scramblase 1	scramb1	Phospholipid scramblase	Contig2871	-0.268616	6.70041	0.145219	1.3426	5.75793	5.98e-06	1.03614	5.75793	0.000681225
dd_Smed_v6_4319_0_1	CYP3A5	Cytochrome P450 3A5	Cyp3a11	Cytochrome P450 3A11	PL06016A2B03	0.385801	7.31807	0.022509	1.48877	6.12615	1.37e-08	1.35407	6.12615	3.16e-07
dd_Smed_v6_4322_0_1	ANK3	Ankyrin-3	Ank3	Ankyrin-3	Contig2289	0.855884	7.09648	0.0022326	1.7946	3.36311	0.000782352	2.01189	3.36311	0.000174823
dd_Smed_v6_4332_0_1	ARAP2	Arf-GAP with Rho-GAP domain, ANK repeat and PH domain-containing protein 2	ARAP2	Arf-GAP with Rho-GAP domain, ANK repeat and PH domain-containing protein 2	PL030017B10A08	0.647182	6.63359	0.00511598	1.31507	3.18535	0.00727699	1.59749	3.18535	0.00100356
dd_Smed_v6_4339_0_1	NA	NA	NA	NA	Contig5402	0.36514	7.23396	0.0252357	1.31858	4.98189	3.73e-05	1.04415	4.98189	0.00154909
dd_Smed_v6_4367_0_1	ABAT	4-aminobutyrate aminotransferase isoform A	Gabat	Gamma-aminobutyric acid transaminase, isoform A	Contig1999	-0.510473	8.12265	0.0129013	1.72682	5.73938	1.06e-06	1.73298	5.73938	1.13e-06
dd_Smed_v6_4368_0_1	TRAF2	TNF receptor-associated factor 2	TRAF2	TNF receptor-associated factor 2	Contig1909	0.604757	7.91993	0.00877904	1.37863	4.28072	2.23e-05	1.32591	4.28072	5.41e-05
dd_Smed_v6_4371_0_1	SHANK3	SH3 and multiple ankyrin repeat domains protein 3	Prosap	LD13733p	PL04009A1E05	0.0902587	6.37555	0.548397	2.20292	5.72385	1.15e-14	2.16219	5.72385	3.89e-14
dd_Smed_v6_4388_0_1	RRAGA	Ras-related GTP-binding protein A	Rraga	Ras-related GTP-binding protein A	Contig6759	0.588074	6.82053	0.0115376	1.329	5.23177	3.1e-06	0.758634	5.23177	0.0131567
dd_Smed_v6_4390_0_1	NA	NA	NA	NA	Contig7436	-0.0970139	7.23009	0.595976	2.64708	1.88293	0.00257429	3.45108	1.88293	0.000103624
dd_Smed_v6_4391_0_1	AASDHPPT	L-aminoadipate-semialdehyde dehydrogenase-phosphopantetheinyl transferase	aasdhppt	Aminoadipate-semialdehyde dehydrogenase-phosphopantetheinyl transferase	Contig6306	0.775244	8.07727	0.00274361	1.47977	3.8454	0.00162607	1.97171	3.8454	2.31e-05
dd_Smed_v6_4393_0_1	AKT3	RAC-gamma serine/threonine-protein kinase	Akt1	RAC serine/threonine-protein kinase	Contig7154	0.473025	7.6385	0.0130274	1.0974	4.14658	0.00727699	0.748861	4.14658	0.092494
dd_Smed_v6_4399_0_1	MAPKAPK3	MAP kinase-activated protein kinase 3	MAPk-Ak2	MAP kinase-activated protein kinase 2	PL05001A2D12	1.30919	8.09806	0.00101618	1.8196	5.01082	2.79e-06	1.7853	5.01082	4.99e-06
dd_Smed_v6_44_0_1	NA	NA	CG44251	Uncharacterized protein, isoform B	Contig330	4.63412	14.3694	2.29e-05	6.41938	13.32	6.54e-45	6.34229	13.32	4.2e-44
dd_Smed_v6_440_0_1	CD63	CD63 antigen	cd63	Tetraspanin	Contig2237	2.87733	11.1108	2.9e-05	2.48332	7.52966	1.1e-10	2.39704	7.52966	5.37e-10
dd_Smed_v6_4411_0_1	NPC2	Epididymal secretory protein E1	Npc2	Epididymal secretory protein E1	Contig2425	-0.642893	7.99103	0.0235337	7.47915	6.3176	1.4e-103	5.39244	6.3176	9.46e-64
dd_Smed_v6_4416_0_1	GCDH	Glutaryl-CoA dehydrogenase, mitochondrial	GCDH	Glutaryl-CoA dehydrogenase, mitochondrial	Contig5685	0.550017	7.66579	0.0054819	1.21899	4.7058	1.4e-05	1.01945	4.7058	0.000381911
dd_Smed_v6_4418_0_1	TMEM63C	Calcium permeable stress-gated cation channel 1	TMEM63C	Calcium permeable stress-gated cation channel 1	Contig6455	0.931095	7.19836	0.00237171	1.5291	4.54294	6.01e-06	1.75274	4.54294	2.12e-07
dd_Smed_v6_442_0_1	GRN	Granulins	GRN	Granulins	Contig2381	3.64913	11.3698	2.29e-05	3.40254	6.53909	3.54e-11	3.44281	6.53909	2.61e-11
dd_Smed_v6_443_0_1	FTH1	Ferritin heavy chain	fth1a	Ferritin	Contig7703	2.01036	10.8699	0.000339823	1.4907	7.74495	3.45e-07	1.46836	7.74495	6.18e-07
dd_Smed_v6_4436_0_1	DSTYK	Dual serine/threonine and tyrosine protein kinase	Dstyk	Dual serine/threonine and tyrosine protein kinase	Contig4177	1.14489	7.41448	0.0014722	2.59742	5.05323	3.55e-16	2.50176	5.05323	4.12e-15
dd_Smed_v6_4438_0_1	NA	NA	Ccdc169	Coiled-coil domain-containing protein 169	Contig4876	0.31831	6.4645	0.474598	2.24339	4.99426	2.57e-11	2.23005	4.99426	3.91e-11
dd_Smed_v6_4445_0_1	NA	NA	NA	NA	Contig4409	0.274306	8.10139	0.402518	1.17359	4.73391	0.00162607	0.901078	4.73391	0.0217476
dd_Smed_v6_4447_0_1	MAP3K3	Mitogen-activated protein kinase kinase kinase 3	Map3k3	Mitogen-activated protein kinase kinase kinase 3	Contig3225	0.265588	7.60998	0.296405	1.22053	6.00118	6.5e-06	1.02429	6.00118	0.000208231
dd_Smed_v6_4449_0_1	CYP2A6	Cytochrome P450 2A6	CYP2A6	Cytochrome P450 2A6	PL06010A1H02	1.75487	8.68978	0.00105754	3.78297	5.50656	1.11e-21	3.95526	5.50656	2.97e-23
dd_Smed_v6_4461_0_1	NA	NA	NA	NA	PL06009A2C02	0.558765	6.83577	0.00757305	2.36992	4.66816	1.3e-07	2.28031	4.66816	4.38e-07
dd_Smed_v6_4469_0_1	NA	NA	snx24	Sorting nexin 24	Contig1901	1.55873	8.27818	0.00013505	2.52975	4.56823	6.42e-07	2.54905	4.56823	6.22e-07
dd_Smed_v6_448_0_1	CORO1C	Coronin-1C	coro	Coronin	Contig6081	1.50541	9.64018	0.00108985	1.94702	6.11605	1.57e-09	1.75342	6.11605	6.61e-08
dd_Smed_v6_4486_0_1	MAP4K4	Mitogen-activated protein kinase kinase kinase kinase 4	tnikb	TRAF2 and NCK-interacting kinase b	PL04009A1H07	0.0540549	6.40731	0.720984	0.830514	3.6966	0.0313095	1.03801	3.6966	0.00626805
dd_Smed_v6_4487_0_1	H2AFY2	Core histone macro-H2A.2	h2afy	Core histone macro-H2A	Contig2797	0.691266	7.66102	0.00184071	1.63498	3.53173	0.00899035	1.51806	3.53173	0.0182205
dd_Smed_v6_4493_0_1	GNAL	Guanine nucleotide-binding protein G(olf) subunit alpha	gnal	Guanine nucleotide-binding protein (G protein), alpha-activating activity polypeptide, olfactory type	Contig4365	1.35166	7.48979	8.03e-05	1.54571	5.49234	2.25e-07	1.5234	5.49234	3.98e-07
dd_Smed_v6_4496_0_1	MPPED1	Metallophosphoesterase domain-containing protein 1	MPPED1	Metallophosphoesterase domain-containing protein 1	Contig1241	1.01267	7.26561	0.00107284	1.39268	4.40911	2.83e-05	1.55251	4.40911	3.11e-06
dd_Smed_v6_452_0_1	TUBA1A	Tubulin alpha-1A chain	alphaTub84B	Tubulin alpha-1 chain	Contig1211	1.40364	8.84919	0.0953498	6.28928	8.65556	5.87e-50	6.21622	8.65556	4.13e-49
dd_Smed_v6_4520_0_1	MPDZ	Multiple PDZ domain protein	Mpdz	Multiple PDZ domain protein	Contig3184	0.692538	6.86646	0.00155286	2.16387	3.32268	1.7e-05	1.90975	3.32268	0.00017615
dd_Smed_v6_4523_0_1	BCO2	Beta,beta-carotene 9',10'-oxygenase	Bco2	Beta,beta-carotene 9',10'-oxygenase	PL03018A1D12	0.262874	7.09276	0.089646	3.30943	3.47065	1.47e-05	3.09709	3.47065	5.41e-05
dd_Smed_v6_4529_0_1	SYVN1	E3 ubiquitin-protein ligase synoviolin	EG:22E5.12	CG4325, isoform A	Contig7722	0.155038	6.18229	0.237225	3.30835	3.18914	7.1e-10	3.84488	3.18914	1.76e-12
dd_Smed_v6_4532_0_1	TSNAXIP1	Translin-associated factor X-interacting protein 1	TSNAXIP1	Translin-associated factor X-interacting protein 1	Contig7392	1.12626	7.65894	0.00680703	2.3004	5.08491	5.13e-16	2.1704	5.08491	2.11e-14
dd_Smed_v6_4534_0_1	VPS16	Vacuolar protein sorting-associated protein 16 homolog	vps16	MGC162584 protein	PL04010A2A09	0.599654	7.27091	0.0168502	1.61235	4.54593	3.23e-06	1.45018	4.54593	3.51e-05
dd_Smed_v6_4550_0_1	VPS18	Vacuolar protein sorting-associated protein 18 homolog	vps18	Vacuolar protein sorting-associated protein 18 homolog	PL06013B1A07	0.449785	6.53081	0.0276188	1.34443	4.85926	3.89e-05	1.49139	4.85926	5.2e-06
dd_Smed_v6_4553_0_1	STK4	Serine/threonine-protein kinase 4	STK4	Serine/threonine-protein kinase 4	Contig1545	1.17885	8.06495	0.000223614	1.26754	5.05975	8.63e-05	1.25529	5.05975	0.000116721
dd_Smed_v6_4554_0_1	ADHFE1	Hydroxyacid-oxoacid transhydrogenase, mitochondrial	Adhfe1	Hydroxyacid-oxoacid transhydrogenase, mitochondrial	PL06013B2A06	-0.174309	6.90826	0.194681	2.60504	3.56463	1.67e-08	2.6506	3.56463	1.1e-08
dd_Smed_v6_456_0_1	CTSF	Cathepsin F	ctsf	Cathepsin F	Contig6032	1.19031	9.94514	0.00640551	2.8234	9.4057	7.73e-18	1.49668	9.4057	5.02e-06
dd_Smed_v6_4567_0_1	NA	NA	NA	NA	Contig1498	2.36672	8.65754	0.000368754	5.75076	4.64401	1.37e-48	5.56683	4.64401	3.4e-46
dd_Smed_v6_4568_0_1	MICALL1	MICAL-like protein 1	Micall2	MICAL-like protein 2	Contig3800	0.118112	6.27315	0.404034	1.2034	4.44881	0.00380909	1.37058	4.44881	0.000957975
dd_Smed_v6_457_0_1	HEL-S-69p	Peptidyl-prolyl cis-trans isomerase	HEL-S-69p	Peptidyl-prolyl cis-trans isomerase	Contig3540	0.00908982	9.10566	0.949631	2.66278	9.59923	2.61e-17	2.65552	9.59923	3.52e-17
dd_Smed_v6_4570_0_1	KLK13	Kallikrein-13	KLK13	Kallikrein-13	Contig4852	-0.781839	7.48391	0.0026015	7.41859	5.25857	4.05e-34	3.96619	5.25857	2.3e-13
dd_Smed_v6_4574_0_1	NA	NA	NA	NA	Contig2727	0.617184	6.24523	0.00515463	1.26776	4.44817	0.000704238	1.07889	4.44817	0.00522177
dd_Smed_v6_4591_0_1	GGT1	Gamma-glutamyltranspeptidase 1	GGT1	Gamma-glutamyltranspeptidase 1	Contig1806	1.6097	8.55832	0.000109268	2.18001	5.21978	4.01e-15	1.78044	5.21978	1.59e-10
dd_Smed_v6_4596_0_1	FLVCR2	Feline leukemia virus subgroup C receptor-related protein 2	dirc2	Disrupted in renal carcinoma 2	Contig2590	0.647615	8.39426	0.00350422	2.26233	4.74408	1.06e-07	2.10978	4.74408	8.23e-07
dd_Smed_v6_4598_0_1	NA	NA	NA	NA	Contig739	2.15824	9.07478	3.84e-05	6.56386	7.22125	1.21e-32	6.08085	7.22125	2.67e-29
dd_Smed_v6_4607_0_1	NA	NA	CELE_Y59A8B.21	Uncharacterized protein	Contig4482	1.06077	7.59661	0.00887456	2.79945	4.74034	4.79e-11	2.56849	4.74034	1.66e-09
dd_Smed_v6_4615_0_1	GALNT1	Polypeptide N-acetylgalactosaminyltransferase 1	gly-5	Polypeptide N-acetylgalactosaminyltransferase 5	Contig6061	0.478212	7.88524	0.00986231	1.03999	4.6367	0.00275365	1.05186	4.6367	0.00278501
dd_Smed_v6_4616_0_1	VAC14	Protein VAC14 homolog	Vac14	Protein VAC14 homolog	Contig4059	0.485496	6.49236	0.0151713	2.53812	5.93684	2.91e-16	2.20492	5.93684	1.09e-12
dd_Smed_v6_4622_0_1	SULT1C4	Sulfotransferase 1C4	SULT1C4	Sulfotransferase 1C4	Contig3821	0.344246	8.67448	0.184569	1.45563	5.04806	1.6e-06	1.39218	5.04806	5.33e-06
dd_Smed_v6_4626_0_1	XIAP	E3 ubiquitin-protein ligase XIAP	Xiap	E3 ubiquitin-protein ligase XIAP	Contig4530	0.249882	6.58997	0.374174	0.896122	4.39687	0.00823963	1.13466	4.39687	0.000660174
dd_Smed_v6_4634_0_1	SLC16A12	Monocarboxylate transporter 12	CELE_Y59A8B.21	Uncharacterized protein	Contig1258	1.39117	7.94094	0.000649094	3.89608	7.12497	6.96e-30	3.6918	7.12497	2.41e-27
dd_Smed_v6_4655_0_1	C5orf22	UPF0489 protein C5orf22	MESR6	LD22716p	PL06020B1C09	0.388138	6.7532	0.0193982	1.68	2.55413	0.006579	1.52854	2.55413	0.0162236
dd_Smed_v6_4660_0_1	NA	NA	NA	NA	PL06013B1C04	0.556118	6.38912	0.019001	1.39716	5.64404	3.54e-06	1.36562	5.64404	6.87e-06
dd_Smed_v6_4666_0_1	NA	NA	NA	NA	Contig1197	1.70424	8.37181	0.000124428	5.52807	3.97993	1.44e-18	5.74742	3.97993	1.3e-19
dd_Smed_v6_4668_0_1	GAA	Lysosomal alpha-glucosidase	GAA	Lysosomal alpha-glucosidase	PL06022A1G02	0.263054	5.95215	0.0867511	1.96319	3.84893	9.06e-06	1.48281	3.84893	0.00107156
dd_Smed_v6_4672_0_1	NA	NA	Mblac1	Metallo-beta-lactamase domain-containing protein 1	Contig3868	0.443238	8.18596	0.0182439	1.10416	4.89539	0.00104968	1.24885	4.89539	0.000206491
dd_Smed_v6_4678_0_1	NA	NA	NA	NA	Contig7185	0.362743	6.89184	0.0400201	0.943972	4.06915	0.0212596	1.1152	4.06915	0.00616581
dd_Smed_v6_4685_0_1	CREB1	CREB1 protein	CREB1	CREB1 protein	Contig4585	0.778303	7.23379	0.000457758	1.11473	4.07215	0.000480339	0.933556	4.07215	0.00468797
dd_Smed_v6_4693_0_1	LIPF	Gastric triacylglycerol lipase	LIPF	Gastric triacylglycerol lipase	Contig1801	-1.01106	8.375	0.000344294	6.73605	6.6297	4.54e-78	5.74788	6.6297	2.5e-62
dd_Smed_v6_4694_0_1	SLC16A14	Monocarboxylate transporter 14	CELE_Y59A8B.21	Uncharacterized protein	Contig1454	1.37525	8.43612	0.000973495	1.71261	5.2286	1.4e-09	1.54022	5.2286	6.54e-08
dd_Smed_v6_4695_0_1	WNK4	Serine/threonine-protein kinase WNK4	Wnk4	Serine/threonine-protein kinase WNK4	PL08004A2H01	1.48706	6.89823	0.00143314	1.69667	6.39092	1.91e-10	1.56345	6.39092	5.54e-09
dd_Smed_v6_4722_0_1	MAP2K3	Dual specificity mitogen-activated protein kinase kinase 3	MAP2K3	Dual specificity mitogen-activated protein kinase kinase 3	Contig4879	1.14307	8.15992	0.000300792	1.40771	4.96871	1.6e-05	1.15608	4.96871	0.000538136
dd_Smed_v6_4729_0_1	TRAF3	TNF receptor-associated factor 3	Traf3	TNF receptor-associated factor 3	Contig4173	0.469025	7.90418	0.0068361	1.99557	4.07147	1.17e-07	2.07669	4.07147	4e-08
dd_Smed_v6_4733_0_1	NA	NA	NA	NA	Contig456	-0.196226	5.72462	0.222584	3.75969	3.50385	1.51e-09	3.57216	3.50385	9.36e-09
dd_Smed_v6_4739_0_1	SLC11A2	Natural resistance-associated macrophage protein 2	Slc11a2	Natural resistance-associated macrophage protein 2	Contig3248	1.37812	7.7065	0.000132414	3.3774	4.5092	4.38e-14	3.09542	4.5092	3.74e-12
dd_Smed_v6_4756_0_1	NA	NA	NA	NA	Contig4571	0.326658	7.2024	0.121957	4.20703	4.26228	1.25e-30	4.17701	4.26228	2.98e-30
dd_Smed_v6_476_0_1	GDI2	Rab GDP dissociation inhibitor beta	GDI2	Rab GDP dissociation inhibitor beta	Contig2264	1.26446	9.81188	0.000296713	1.29256	5.09577	0.000103933	1.59611	5.09577	1.52e-06
dd_Smed_v6_4760_0_1	USP2	Ubiquitin carboxyl-terminal hydrolase 2	usp21	Ubiquitin-specific peptidase 21	Contig3759	0.134564	6.61787	0.498873	1.98801	4.88299	7.49e-13	1.91117	4.88299	6.33e-12
dd_Smed_v6_4766_0_1	NAA60	N-alpha-acetyltransferase 60	Naa60	N-alpha-acetyltransferase 60	Contig1845	0.43369	7.92909	0.0311579	1.13289	4.03171	0.00679069	1.12356	4.03171	0.00828308
dd_Smed_v6_4773_0_1	CTSA	Lysosomal protective protein	Ctsa	Lysosomal protective protein	Contig6373	0.0424161	6.83663	0.879334	1.48672	3.82809	0.000572123	0.985709	3.82809	0.0331197
dd_Smed_v6_4779_0_1	EPN1	Epsin-1	epn-1	EPsiN (Endocytic protein) homolog	Contig3992	0.556683	7.90911	0.00376937	1.08848	6.16945	8.03e-05	1.11256	6.16945	6.28e-05
dd_Smed_v6_4785_0_1	ASMTL	N-acetylserotonin O-methyltransferase-like protein	1810009N02Rik	Putative uncharacterized protein	Contig2758	1.30286	9.11131	0.0001	1.07369	7.03685	0.000488932	0.909682	7.03685	0.00422713
dd_Smed_v6_4792_0_1	NOTCH4	Neurogenic locus notch homolog protein 4	ft	Cadherin-related tumor suppressor	Contig7216	1.80685	7.83074	0.000683683	3.89414	3.73013	2.32e-21	3.05721	3.73013	3.25e-14
dd_Smed_v6_4794_0_1	PIK3R1	Phosphatidylinositol 3-kinase regulatory subunit alpha	Pik3r1	Phosphatidylinositol 3-kinase regulatory subunit alpha	PL06012B1A07	0.28999	6.56438	0.181273	1.28742	4.01846	0.000623012	0.953001	4.01846	0.0163726
dd_Smed_v6_48_0_1	CTSL	Cathepsin L1	ctsl.1	Cathepsin L.1	Contig240	5.05844	13.7354	2.29e-05	5.03284	13.1276	5.17e-37	5.07074	13.1276	2.12e-37
dd_Smed_v6_4801_0_1	NA	NA	NA	NA	Contig361	0.225895	6.32694	0.148087	1.15815	4.63406	0.0014218	0.684072	4.63406	0.0890419
dd_Smed_v6_4809_0_1	NA	NA	NA	NA	Contig2014	0.988596	7.14708	0.0011217	1.27552	4.72788	0.000156771	1.31735	4.72788	0.000104768
dd_Smed_v6_4821_0_1	PXK	PX domain-containing protein kinase-like protein	PXK	PX domain-containing protein kinase-like protein	Contig2268	1.21223	7.44464	0.000255934	2.43993	3.87861	6.63e-11	1.8735	3.87861	6.4e-07
dd_Smed_v6_4823_0_1	GGA1	ADP-ribosylation factor-binding protein GGA1	GGA1	ADP-ribosylation factor-binding protein GGA1	Contig529	1.12553	7.95822	0.000109358	1.0594	4.46418	0.0007853	0.76091	4.46418	0.0235007
dd_Smed_v6_4828_0_1	NA	NA	NA	NA	Contig2573	1.00808	7.69872	0.0200291	3.0348	2.18106	1.36e-05	2.85567	2.18106	4.69e-05
dd_Smed_v6_4832_0_1	CARMIL1	F-actin-uncapping protein LRRC16A	Carmil1	F-actin-uncapping protein LRRC16A	PL08003B2H11	0.872676	7.73796	0.00320222	1.31733	4.37432	0.00150656	1.3705	4.37432	0.00105466
dd_Smed_v6_4834_0_1	SDR16C5	Epidermal retinol dehydrogenase 2	sdr16c5a	Short chain dehydrogenase/reductase family 16C, member 5a	Contig3887	0.726152	8.06912	0.00925655	1.59335	5.58884	1.69e-08	1.56787	5.58884	3.37e-08
dd_Smed_v6_4836_0_1	SLC2A13	Proton myo-inositol cotransporter	SLC2A13	Proton myo-inositol cotransporter	Contig1055	0.929098	6.95253	0.00174119	1.39911	2.59954	0.0310384	1.94228	2.59954	0.0022675
dd_Smed_v6_4849_0_1	MAP3K5	Mitogen-activated protein kinase kinase kinase 5	Map3k5	Mitogen-activated protein kinase kinase kinase 5	Contig1959	0.654023	6.75514	0.0077637	1.25571	5.11794	1.47e-05	1.20762	5.11794	3.68e-05
dd_Smed_v6_485_0_1	PLBD2	Putative phospholipase B-like 2	zgc:158619	Zgc:158619 protein	Contig980	3.11414	11.1796	2.29e-05	2.03595	8.54019	4.08e-12	1.90544	8.54019	1e-10
dd_Smed_v6_4858_0_1	TMEM106A	Transmembrane protein 106A	tmem106ba	Transmembrane protein 106Ba	Contig1594	1.57065	8.48255	7.31e-05	2.16744	5.36248	5.76e-13	2.22822	5.36248	1.52e-13
dd_Smed_v6_4869_0_1	USP47	Ubiquitin carboxyl-terminal hydrolase 47	Usp47	Ubiquitin carboxyl-terminal hydrolase 47	Contig6197	2.49804	7.87883	0.000836938	6.5052	4.6635	4.97e-39	6.27856	4.6635	5.24e-37
dd_Smed_v6_487_0_1	GCLM	Glutamate--cysteine ligase regulatory subunit	GCLM	Glutamate--cysteine ligase regulatory subunit	Contig5506	1.01674	8.44144	0.00392025	0.63045	8.98043	0.0495609	1.2085	8.98043	5.73e-05
dd_Smed_v6_4876_0_1	NA	NA	NA	NA	PL04025B1G01	1.11173	7.63907	0.00196014	3.71918	3.58812	1.58e-10	3.74497	3.58812	1.44e-10
dd_Smed_v6_488_0_1	RAB1A	Ras-related protein Rab-1A	rab1aa	RAB1A, member RAS oncogene family a	Contig3635	1.30006	10.2251	0.00049642	1.16832	8.19754	2.71e-05	1.01403	8.19754	0.00035714
dd_Smed_v6_4884_0_1	NA	NA	NA	NA	Contig7234	0.507582	7.43841	0.0154267	1.25801	4.90043	5.94e-05	1.27645	4.90043	5.22e-05
dd_Smed_v6_4894_0_1	WDFY2	WD repeat and FYVE domain-containing protein 2	WDFY2	WD repeat and FYVE domain-containing protein 2	Contig6545	0.85863	8.00062	0.00899528	2.38585	4.25041	1.7e-10	1.87557	4.25041	6.18e-07
dd_Smed_v6_4896_0_1	HPRT1	Hypoxanthine-guanine phosphoribosyltransferase	Hprt1	Hypoxanthine-guanine phosphoribosyltransferase	Contig2286	1.01147	7.83124	0.000694513	1.76802	4.5793	1.67e-08	1.62125	4.5793	2.87e-07
dd_Smed_v6_4901_0_1	CPT1A	Carnitine O-palmitoyltransferase 1, liver isoform	CPT1A	Carnitine O-palmitoyltransferase 1, liver isoform	PL05001B2F02	0.21444	8.2908	0.352779	2.35297	5.33036	1.13e-09	2.18746	5.33036	1.72e-08
dd_Smed_v6_491_0_1	RAB7A	Ras-related protein Rab-7a	rab7	RAB7, member RAS oncogene family	Contig614	2.46969	10.6144	2.44e-05	2.54047	7.54175	1.45e-14	2.35379	7.54175	1.03e-12
dd_Smed_v6_4918_0_1	TMUB2	Transmembrane and ubiquitin-like domain-containing protein 2	Tmub2	Transmembrane and ubiquitin-like domain-containing protein 2	Contig4891	1.05063	7.43442	0.00497333	1.26161	4.39095	0.000244719	1.17833	4.39095	0.000752922
dd_Smed_v6_492_0_1	FAM213B	Prostamide/prostaglandin F synthase	Fam213b	Prostamide/prostaglandin F synthase	Contig4209	0.276251	9.48854	0.121295	1.43006	9.02541	6.69e-06	1.43379	9.02541	7.29e-06
dd_Smed_v6_4921_0_1	ANK2	Ankyrin-2	ank3a	Ankyrin 3a	Contig4405	0.875038	8.10173	0.000559203	1.15931	5.01483	5.53e-05	0.859723	5.01483	0.00416905
dd_Smed_v6_4922_0_1	ACAD10	Acyl-CoA dehydrogenase family member 10	Dmel\CG6638	CG6638	Contig6342	0.6026	7.34059	0.00869049	2.18967	5.51773	6.04e-11	2.18481	5.51773	7.78e-11
dd_Smed_v6_4923_0_1	NA	NA	NA	NA	PL06020B2E02	-0.014668	6.66744	0.186719	1.90115	5.57405	1.55e-09	1.88481	5.57405	2.51e-09
dd_Smed_v6_4935_0_1	NLGN4X	Neuroligin-4, X-linked	nlgn4b	Neuroligin 4b	Contig5540	0.697654	8.07595	0.00144637	1.58111	3.96251	1.15e-06	1.44392	3.96251	1.11e-05
dd_Smed_v6_4936_0_1	NA	NA	NA	NA	Contig2915	0.892004	7.81412	0.00107477	1.40981	2.75796	0.00691944	1.33779	2.75796	0.0122918
dd_Smed_v6_4946_0_1	AGPAT4	1-acyl-sn-glycerol-3-phosphate acyltransferase delta	AGPAT4	1-acyl-sn-glycerol-3-phosphate acyltransferase delta	PL06015B2E06	-0.596994	8.40186	0.0277945	1.2453	4.53757	0.00102597	0.89905	4.53757	0.025704
dd_Smed_v6_4947_0_1	MOGAT2	2-acylglycerol O-acyltransferase 2	MOGAT2	2-acylglycerol O-acyltransferase 2	Contig4052	-0.460223	7.58368	0.0175441	2.7576	5.71858	3.35e-18	2.67087	5.71858	3.5e-17
dd_Smed_v6_4958_0_1	PPM1E	Protein phosphatase 1E	Ppm1e	Protein phosphatase 1E	PL030007B10H05	0.225428	6.54203	0.407804	1.00763	3.74701	0.00982336	1.28553	3.74701	0.000800054
dd_Smed_v6_4964_0_1	RAB11A	Ras-related protein Rab-11A	Rab11	Drab11	Contig2392	1.16704	7.69647	0.000897941	2.42162	2.3182	0.000157096	3.03608	2.3182	2.66e-06
dd_Smed_v6_4970_0_1	ACP5	Tartrate-resistant acid phosphatase type 5	Acp5	Tartrate-resistant acid phosphatase type 5	Contig2271	1.21082	7.38825	0.000845893	1.4519	4.0534	0.00136699	1.23207	4.0534	0.00866041
dd_Smed_v6_4971_0_1	NA	NA	Tmem144	Transmembrane protein 144	Contig6286	1.72014	8.01569	0.00173134	4.65893	7.67004	3.27e-48	4.80139	7.67004	1.95e-50
dd_Smed_v6_498_0_1	STARD10	START domain-containing protein 10	Stard10	START domain-containing protein 10	Contig6485	1.05156	9.87046	0.00291581	1.46309	8.50561	4.27e-07	1.29718	8.50561	9.57e-06
dd_Smed_v6_4983_0_1	FAM200B	Protein FAM200B	FAM200B	Protein FAM200B	Contig781	2.37252	8.44572	2.78e-05	2.64285	4.47394	3.21e-12	2.62004	4.47394	5.71e-12
dd_Smed_v6_4992_0_1	ZFAND5	AN1-type zinc finger protein 5	Zfand4	AN1-type zinc finger protein 4	Contig4355	0.546719	6.32861	0.00431178	2.47337	5.47624	1.23e-12	2.1702	5.47624	4.8e-10
dd_Smed_v6_4993_0_1	USP46	Ubiquitin carboxyl-terminal hydrolase 46	usp-3	Ubiquitinyl hydrolase 1	Contig5095	1.14661	7.93944	0.000215925	0.820774	4.79952	0.0227216	1.02928	4.79952	0.00372373
dd_Smed_v6_500_0_1	NA	NA	NA	NA	Contig5535	3.22524	11.6143	2.57e-05	5.83129	8.17541	7.14e-66	5.46182	8.17541	7.28e-60
dd_Smed_v6_5009_0_1	VPS25	Vacuolar protein-sorting-associated protein 25	vps25	Vacuolar protein-sorting-associated protein 25	Contig1215	0.528258	7.80419	0.0054698	1.2224	4.12533	0.00012592	1.38668	4.12533	1.33e-05
dd_Smed_v6_502_0_1	RMDN1	Regulator of microtubule dynamics protein 1	RMDN1	Regulator of microtubule dynamics protein 1	Contig2191	1.92863	10.5142	0.00105301	1.3534	9.11625	3.22e-05	1.23058	9.11625	0.000196498
dd_Smed_v6_5021_0_1	NA	NA	NA	NA	Contig7115	0.658362	8.63045	0.013669	1.47323	3.40545	0.00172461	0.882697	3.40545	0.08822
dd_Smed_v6_5049_0_1	RAB6A	Ras-related protein Rab-6A	RAB6A	Ras-related protein Rab-6A	Contig3247	1.21475	7.19734	0.00262216	4.19188	4.26534	8.4e-24	4.23284	4.26534	3.69e-24
dd_Smed_v6_5056_0_1	NA	NA	NA	NA	Contig737	2.40178	9.29375	2.81e-05	7.25312	5.62124	6.45e-65	7.04695	5.62124	3.7e-62
dd_Smed_v6_5067_0_1	NA	NA	NA	NA	Contig7433	0.894649	8.53549	0.0112923	2.84748	3.74397	2.65e-09	2.88375	3.74397	2.01e-09
dd_Smed_v6_5075_0_1	NA	NA	NA	NA	PL06016A1H05	0.410368	6.34606	0.0969078	2.60631	5.3437	1.39e-21	2.41998	5.3437	6.85e-19
dd_Smed_v6_5083_0_1	ATG7	Ubiquitin-like modifier-activating enzyme ATG7	ATG7	Ubiquitin-like modifier-activating enzyme ATG7	PL05001A1C04	1.17287	7.89491	0.00642848	2.11306	5.40366	8.36e-14	2.09184	5.40366	1.69e-13
dd_Smed_v6_509_0_1	COX7C	Cytochrome c oxidase subunit 7C, mitochondrial	COX7C	Cytochrome c oxidase subunit 7C, mitochondrial	Contig7286	-0.692467	9.94992	0.00769449	1.08756	6.84724	0.00218718	0.75952	6.84724	0.046493
dd_Smed_v6_5091_0_1	NA	NA	NA	NA	Contig1156	0.920817	7.82327	0.000202894	2.39751	2.34346	0.000383887	2.80573	2.34346	3.76e-05
dd_Smed_v6_5093_0_1	NA	NA	NA	NA	Contig6914	1.13216	7.1781	0.00110191	1.88048	2.93904	0.00079434	1.63171	2.93904	0.004545
dd_Smed_v6_5135_0_1	PPP1R2	Protein phosphatase inhibitor 2	szy-2	Suppressor of ZYg-1	Contig4044	-0.206888	7.61481	0.483855	2.18726	2.11536	0.00557338	1.65966	2.11536	0.0449907
dd_Smed_v6_5138_0_1	MAP3K3	Mitogen-activated protein kinase kinase kinase 3	MAP3K3	Mitogen-activated protein kinase kinase kinase 3	PL06008B2F01	0.54133	7.00911	0.085579	2.11063	4.74458	4.05e-09	1.98881	4.74458	3.54e-08
dd_Smed_v6_5143_0_1	ADAM9	Disintegrin and metalloproteinase domain-containing protein 9	Meltrin	ADAM metalloprotease	Contig2176	1.52908	7.59572	9.91e-05	1.31845	4.28594	3.15e-05	1.43086	4.28594	6.5e-06
dd_Smed_v6_5148_0_1	PM20D2	Peptidase M20 domain-containing protein 2	PM20D2	Peptidase M20 domain-containing protein 2	Contig1331	0.339931	7.86283	0.057476	1.00915	3.81352	0.0400327	1.3454	3.81352	0.00516327
dd_Smed_v6_5158_0_1	ESYT2	Extended synaptotagmin-2	Esyt2	Extended synaptotagmin-like protein 2 ortholog, isoform A	Contig4358	0.206427	6.61792	0.130959	1.74076	3.85844	3.54e-05	1.89418	3.85844	7.41e-06
dd_Smed_v6_5184_0_1	BLOC1S4	Biogenesis of lysosome-related organelles complex 1 subunit 4	bloc1s4	Biogenesis of lysosomal organelles complex-1, subunit 4, cappuccino	Contig2431	1.07687	6.93165	0.000200451	2.2219	1.90321	0.00442737	2.10472	1.90321	0.00819234
dd_Smed_v6_5186_0_1	TBCEL	Tubulin-specific chaperone cofactor E-like protein	mlt	GH13040p	PL08001B1C02	0.835679	8.59632	0.0121986	1.87984	4.99393	6.13e-08	1.508	4.99393	1.83e-05
dd_Smed_v6_5189_0_1	TNFAIP8L2	Tumor necrosis factor alpha-induced protein 8-like protein 2	tnfaip8l3	Tumor necrosis factor alpha-induced protein 8-like protein 3	Contig6981	0.863816	6.10335	0.00146198	1.01452	3.89247	0.018493	1.2398	3.89247	0.00358554
dd_Smed_v6_5192_0_1	PAK1	Serine/threonine-protein kinase PAK 1	pak1	P21 protein (Cdc42/Rac)-activated kinase 1	Contig1109	1.26512	8.72816	0.000316903	1.75036	5.65694	1.53e-09	1.69731	5.65694	5.62e-09
dd_Smed_v6_522_0_1	RALA	Ras-related protein Ral-A	Rala	Ras-related protein Ral-A	Contig344	2.15634	10.3342	2.44e-05	2.01139	6.96216	6.4e-13	2.02753	6.96216	4.92e-13
dd_Smed_v6_5220_0_1	AMDHD1	Probable imidazolonepropionase	AMDHD1	Probable imidazolonepropionase	Contig808	0.00329879	8.28882	0.672709	3.19635	6.06533	1.49e-28	3.28309	6.06533	7.67e-30
dd_Smed_v6_5238_0_1	FLVCR2	Feline leukemia virus subgroup C receptor-related protein 2	Mfsd7	Major facilitator superfamily domain-containing protein 7	Contig4995	0.691864	7.03745	0.0030276	3.86463	2.93582	2.99e-07	3.71998	2.93582	8.66e-07
dd_Smed_v6_5241_0_1	TSPAN6	Tetraspanin-6	Tspan6	Tetraspanin-6	Contig3022	1.83528	8.44915	0.000159022	3.60687	4.89942	5.11e-20	3.12229	4.89942	1.03e-15
dd_Smed_v6_5247_0_1	ALOX12B	Arachidonate 12-lipoxygenase, 12R-type	ALOX12B	Arachidonate 12-lipoxygenase, 12R-type	Contig544	0.646644	8.33743	0.0117327	1.14923	3.66997	0.0064479	1.1336	3.66997	0.00824675
dd_Smed_v6_526_0_1	AHCY	Adenosylhomocysteinase	ahcy	Adenosylhomocysteinase	Contig1200	0.345021	11.2269	0.0160437	2.05274	8.72914	1.1e-09	1.71886	8.72914	4.13e-07
dd_Smed_v6_5267_0_1	SNX30	Sorting nexin-30	SNX30	Sorting nexin-30	Contig5833	0.928548	7.48238	0.00702041	2.20758	4.84493	1.33e-14	2.3535	4.84493	2.71e-16
dd_Smed_v6_5274_0_1	WDR13	WD repeat-containing protein 13	Wdr13	WD repeat-containing protein 13	PL05004A1E12	0.350984	8.18425	0.0753488	1.27074	5.27204	5.79e-05	0.786563	5.27204	0.0205304
dd_Smed_v6_5287_0_1	MPP6	MAGUK p55 subfamily member 6	mpp6a	Membrane protein, palmitoylated 6a (MAGUK p55 subfamily member 6)	PL06019A1C07	0.338452	7.24267	0.0771677	1.17313	5.81867	4.61e-05	1.13059	5.81867	0.000102913
dd_Smed_v6_5298_0_1	NA	NA	NA	NA	PL06017A1B09	0.476377	6.75904	0.0167614	1.25606	5.28821	0.000331805	1.35045	5.28821	0.000120767
dd_Smed_v6_5314_0_1	ARFGEF2	Brefeldin A-inhibited guanine nucleotide-exchange protein 2	Sec71	LD29171p	PL06009A1H03	0.169726	6.49307	0.338261	0.98162	5.33792	0.00474972	1.05695	5.33792	0.00246671
dd_Smed_v6_5330_0_1	KY	Kyphoscoliosis peptidase	Hil	Hillarin	Contig4116	0.220857	6.27197	0.257405	1.43884	6.29649	2.64e-05	1.43497	6.29649	3.19e-05
dd_Smed_v6_5339_0_1	NA	NA	CG2794	CG2794	Contig2349	0.456286	6.53241	0.0200872	3.01343	4.78346	8.58e-24	3.2009	4.78346	2.22e-26
dd_Smed_v6_5342_0_1	RBCK1	RanBP-type and C3HC4-type zinc finger-containing protein 1	rbck1	RanBP-type and C3HC4-type zinc finger-containing protein 1	Contig4451	0.573864	6.99233	0.461256	1.23998	4.62361	0.000274199	1.22643	4.62361	0.000371708
dd_Smed_v6_5344_0_1	CYP2F1	Cytochrome P450 2F1	Cyp2f2	Cytochrome P450 2F2	Contig6917	2.44099	8.7511	0.000679267	5.29024	5.59097	8.47e-32	5.2531	5.59097	2e-31
dd_Smed_v6_5369_0_1	ATG9A	Autophagy-related protein 9A	Atg9	Autophagy-related protein 9	PL08010A1A11	0.640459	7.63934	0.0280843	1.79454	2.55824	0.000447121	1.18363	2.55824	0.0300873
dd_Smed_v6_5388_0_1	NA	NA	NA	NA	Contig5643	1.23806	7.71369	0.00766764	2.3718	2.15085	0.0125454	2.92214	2.15085	0.0022426
dd_Smed_v6_54_0_1	NA	NA	CG10527	Uncharacterized protein	Contig536	3.82345	13.4992	2.29e-05	3.34428	12.1256	6.41e-20	3.21692	12.1256	1.26e-18
dd_Smed_v6_540_0_1	NA	NA	NA	NA	Contig631	3.22023	10.3722	2.61e-05	2.44334	9.41094	1.27e-15	2.31734	9.41094	3.39e-14
dd_Smed_v6_5400_0_1	CCDC22	Coiled-coil domain-containing protein 22	ccdc22	Coiled-coil domain-containing protein 22	Contig6374	1.22129	7.3805	0.00269692	1.77097	5.37675	7.77e-09	1.68165	5.37675	5.13e-08
dd_Smed_v6_5408_0_1	METTL27	Methyltransferase-like protein 27	METTL27	Methyltransferase-like protein 27	Contig375	1.33677	7.49697	0.00224555	5.60356	3.18394	3.07e-18	5.71217	3.18394	1.01e-18
dd_Smed_v6_5416_0_1	ZFYVE21	Zinc finger FYVE domain-containing protein 21	Zfyve21	Zinc finger FYVE domain-containing protein 21	Contig927	0.712643	7.27662	0.00123794	1.10462	3.78546	0.008664	1.04418	3.78546	0.0155194
dd_Smed_v6_542_0_1	POR	NADPH--cytochrome P450 reductase	porb	NADPH--cytochrome P450 reductase	Contig425	1.50993	9.90903	9.98e-05	2.07066	8.6066	3.35e-13	1.97763	8.6066	4.16e-12
dd_Smed_v6_5420_0_1	NA	NA	NA	NA	Contig130	0.477194	9.08315	0.0136277	1.20797	4.42409	0.000100408	0.693412	4.42409	0.0414008
dd_Smed_v6_5432_0_1	LRSAM1	E3 ubiquitin-protein ligase LRSAM1	lrsam1	Leucine-rich repeat and sterile alpha motif-containing 1	PL06009A2B03	0.357969	6.07811	0.0694709	1.55605	4.81864	4.45e-06	1.58795	4.81864	3.18e-06
dd_Smed_v6_5433_0_1	NA	NA	Plcxd3	PI-PLC X domain-containing protein 3	Contig2968	1.1518	7.97933	0.000375728	2.35917	3.41683	9.91e-08	2.09951	3.41683	2.44e-06
dd_Smed_v6_5445_0_1	NA	NA	NA	NA	Contig3155	1.86474	8.29109	0.000433576	3.00533	4.89357	3.24e-17	3.05415	4.89357	1.22e-17
dd_Smed_v6_545_0_1	ATP6V1G2	V-type proton ATPase subunit G 2	vha-10	Probable V-type proton ATPase subunit G	Contig118	1.46649	7.51988	0.00105408	1.99533	7.64254	5.41e-09	1.88029	7.64254	4.65e-08
dd_Smed_v6_5459_0_1	OMA1	Metalloendopeptidase OMA1, mitochondrial	oma1	Metalloendopeptidase OMA1, mitochondrial	Contig503	0.111458	7.61425	0.410856	1.42283	3.46635	0.00117461	0.808531	3.46635	0.0973393
dd_Smed_v6_5460_0_1	TRAF3	TNF receptor-associated factor 3	traf3	TNF receptor-associated factor 3	PL06022B2D05	0.505147	8.16833	0.0255478	1.3936	3.95529	0.00216341	1.07647	3.95529	0.0244262
dd_Smed_v6_5462_0_1	NA	NA	NA	NA	Contig2049	-0.245097	7.23191	0.24778	1.84885	4.26743	2.98e-08	1.78278	4.26743	1.07e-07
dd_Smed_v6_5472_0_1	NA	NA	NA	NA	Contig302	1.50357	8.0784	0.000156743	1.15251	5.15762	5.5e-05	1.01391	5.15762	0.000505867
dd_Smed_v6_5473_0_1	RNF123	E3 ubiquitin-protein ligase RNF123	Rspry1	RING finger and SPRY domain-containing protein 1	Contig19	1.16231	8.25976	0.002336	1.3446	4.44106	0.000657247	1.04906	4.44106	0.0110401
dd_Smed_v6_5476_0_1	SLC13A3	Solute carrier family 13 member 3	slc13a5a	Sodium-dependent citrate transporter	Contig5206	1.03101	7.4898	0.000794781	4.07457	5.51827	1.42e-28	4.23719	5.51827	2.23e-30
dd_Smed_v6_5480_0_1	NA	NA	NA	NA	Contig7413	0.48093	7.77886	0.107464	1.77164	3.7452	1.69e-06	1.71371	3.7452	4.29e-06
dd_Smed_v6_5510_0_1	TRAF3	TNF receptor-associated factor 3	Traf3	TNF receptor-associated factor 3	Contig1559	1.90384	7.81383	6.13e-05	4.7388	4.89635	1.7e-32	4.52229	4.89635	3.67e-30
dd_Smed_v6_5528_0_1	SLC46A1	Proton-coupled folate transporter	Slc46a1	Proton-coupled folate transporter	Contig2684	2.6546	8.65832	2.61e-05	6.94411	4.86283	5.6e-45	7.00898	4.86283	1.49e-45
dd_Smed_v6_553_0_1	HDLBP	Vigilin	hdlbpa	High density lipoprotein-binding protein a	Contig5029	0.819943	8.70424	0.00297784	1.25382	9.15294	1.29e-05	1.16307	9.15294	6.48e-05
dd_Smed_v6_5533_0_1	C16orf62	UPF0505 protein C16orf62	-	UPF0505 protein C16orf62 homolog	Contig348	1.568	7.98043	4.79e-05	1.93439	4.12319	8.53e-07	1.88788	4.12319	1.82e-06
dd_Smed_v6_5546_0_1	SLC52A3	Solute carrier family 52, riboflavin transporter, member 3	Slc52a3	Solute carrier family 52, riboflavin transporter, member 3	Contig41	0.672151	7.46684	0.0621281	1.61368	4.48092	9.93e-08	1.80135	4.48092	2.75e-09
dd_Smed_v6_5549_0_1	NA	NA	NA	NA	Contig2427	0.373046	6.08684	0.0913456	4.79264	3.90525	5.8e-16	4.65265	3.90525	3.32e-15
dd_Smed_v6_555_0_1	SH3D19	SH3 domain-containing protein 19	Sh3d19	SH3 domain-containing protein 19	Contig6657	1.58154	9.54107	0.00158925	1.33878	8.44636	8.27e-06	0.993341	8.44636	0.00138264
dd_Smed_v6_5559_0_1	RALGPS1	Ras-specific guanine nucleotide-releasing factor RalGPS1	Ralgps2	Ras-specific guanine nucleotide-releasing factor RalGPS2	PL06011A1H04	0.485838	6.44774	0.015676	2.49314	3.94255	6.73e-11	2.53555	3.94255	3.79e-11
dd_Smed_v6_5578_0_1	YTHDF2	YTH domain-containing family protein 2	YTHDF2	YTH domain-containing family protein 2	Contig6103	0.905475	7.74484	0.00905332	1.17444	6.10844	4.55e-05	1.15036	6.10844	7.68e-05
dd_Smed_v6_5583_0_1	STK24	Epididymis secretory protein Li 95	pak-2	Serine/threonine-protein kinase pak-2	PL05001A1E05	0.564439	6.71244	0.107112	1.10836	3.69961	0.0119499	1.1509	3.69961	0.00987349
dd_Smed_v6_5606_0_1	NA	NA	NA	NA	Contig1579	2.30717	7.61414	8.29e-05	6.38018	4.84365	4.33e-24	6.5829	4.84365	3.77e-25
dd_Smed_v6_5625_0_1	CYLD	Ubiquitin carboxyl-terminal hydrolase CYLD	cylda	Cylindromatosis (turban tumor syndrome), a	Contig5816	0.162745	6.371	0.275387	1.64452	3.26902	0.0144055	2.17552	3.26902	0.00107692
dd_Smed_v6_564_0_1	CNFN	Cornifelin	ponzr2	Plac8 onzin-related protein 2	Contig902	2.25125	10.9584	5.24e-05	5.55432	6.95947	1.53e-64	5.36905	6.95947	3.03e-61
dd_Smed_v6_5643_0_1	AGPAT3	1-acyl-sn-glycerol-3-phosphate acyltransferase gamma	AGPAT3	1-acyl-sn-glycerol-3-phosphate acyltransferase gamma	Contig3433	0.93647	6.76012	0.00159121	2.09359	5.39212	3.94e-13	2.04538	5.39212	1.53e-12
dd_Smed_v6_5658_0_1	RPS6KB1	Ribosomal protein S6 kinase beta-1	rsks-1	Ribosomal protein S6 kinase beta	Contig4789	0.445358	6.99684	0.0164532	1.02226	4.60373	0.00116976	1.08151	4.60373	0.000632176
dd_Smed_v6_5660_0_1	SLC9A1	Sodium/hydrogen exchanger 1	Nhe2	Sodium/hydrogen exchanger	PL06017A2G04	0.50189	6.14869	0.0107907	6.1212	5.56196	8.26e-58	5.81582	5.56196	1.54e-53
dd_Smed_v6_567_0_1	CYB5A	Cytochrome b5	cyb5a	Cyb5a protein	Contig4549	1.2087	8.47945	0.0021417	2.49917	8.2198	6.19e-18	2.45439	8.2198	2.51e-17
dd_Smed_v6_5671_0_1	MTTP	Microsomal triglyceride transfer protein large subunit	Mtp	SD01502p	Contig3678	0.439804	7.28973	0.0129323	4.20743	4.78613	4.99e-41	4.1679	4.78613	2.08e-40
dd_Smed_v6_5686_0_1	AMACR	Alpha-methylacyl-CoA racemase	amacr	Alpha-methylacyl-CoA racemase	Contig3670	-0.218918	7.03097	0.494055	1.19477	5.22448	0.000113849	1.02039	5.22448	0.0013187
dd_Smed_v6_5691_0_1	RANBP2	E3 SUMO-protein ligase RanBP2	Plcxd3	PI-PLC X domain-containing protein 3	Contig3053	-0.413015	6.73308	0.273277	4.66367	6.22143	2.7e-55	2.8194	6.22143	5.46e-24
dd_Smed_v6_5696_0_1	MPDU1	Mannose-P-dolichol utilization defect 1 protein	Mpdu1	Mannose-P-dolichol utilization defect 1 protein	Contig1044	0.233665	8.88814	0.129584	1.36884	4.02866	0.00275156	1.547	4.02866	0.000716926
dd_Smed_v6_5699_0_1	PLEKHF2	Pleckstrin homology domain-containing family F member 2	rush	Pleckstrin homology domain-containing family F member 1 homolog	Contig719	1.1521	7.03011	0.000431587	1.99215	4.08984	7.55e-06	2.11256	4.08984	2.33e-06
dd_Smed_v6_5702_0_1	SLC39A1	Zinc transporter ZIP1	Slc39a1	Zinc transporter ZIP1	Contig5795	2.19588	8.85438	0.000335695	5.71582	7.00152	1.07e-52	5.79469	7.00152	1.16e-53
dd_Smed_v6_5715_0_1	TRAF6	TNF receptor-associated factor 6	TRAF6	TNF receptor-associated factor 6	Contig1145	1.78232	6.83884	0.000320818	2.45109	4.41664	4.69e-15	2.16924	4.41664	4.18e-12
dd_Smed_v6_5719_0_1	CAPN9	Calpain-9	Capn1	Calpain-1 catalytic subunit	Contig6468	0.280722	7.32096	0.0724085	1.04574	5.6176	0.00245184	0.988972	5.6176	0.00505777
dd_Smed_v6_5726_0_1	DAO	D-amino-acid oxidase	Dao	D-amino-acid oxidase	Contig3412	1.22421	8.7531	0.000101977	2.64918	4.5327	1.55e-13	2.62721	4.5327	2.77e-13
dd_Smed_v6_5733_0_1	PTPRQ	Phosphatidylinositol phosphatase PTPRQ	Ptp10D	Tyrosine-protein phosphatase 10D	PL05001B1C04	0.967318	6.61839	0.00730272	5.12143	3.48601	3.65e-14	5.24863	3.48601	1.27e-14
dd_Smed_v6_5734_0_1	POLG	DNA polymerase subunit gamma-1	tam	DNA polymerase subunit gamma-1, mitochondrial	Contig2435	0.338263	7.29298	0.0726704	1.05462	5.50748	0.00112961	0.956141	5.50748	0.00401413
dd_Smed_v6_5751_0_1	RGS8	Regulator of G-protein signaling 8	RGS8	Regulator of G-protein signaling 8	Contig4561	1.07268	8.13213	0.00053773	1.49192	5.42874	1.44e-06	1.31072	5.42874	2.95e-05
dd_Smed_v6_576_0_1	HEXB	Beta-hexosaminidase subunit beta	hexa	Beta-hexosaminidase	Contig843	2.91441	9.81624	2.53e-05	2.63569	8.14731	1.9e-12	2.43035	8.14731	8.62e-11
dd_Smed_v6_5782_0_1	RBCK1	RanBP-type and C3HC4-type zinc finger-containing protein 1	rbck1	RanBP-type and C3HC4-type zinc finger-containing protein 1	Contig4636	0.724988	7.23993	0.0303201	1.21079	3.85686	0.000820847	1.05497	3.85686	0.00463902
dd_Smed_v6_5786_0_1	SBSPON	Somatomedin-B and thrombospondin type-1 domain-containing protein	SBSPON	Somatomedin-B and thrombospondin type-1 domain-containing protein	Contig5083	0.404199	7.15794	0.116745	3.5034	3.65388	2.67e-07	3.75172	3.65388	5.13e-08
dd_Smed_v6_5790_0_1	EIF4E	Eukaryotic translation initiation factor 4E	eif4e1a	Eukaryotic translation initiation factor 4E-1A	Contig1385	0.931317	7.44827	0.00132963	1.38278	4.13139	0.0019716	1.67706	4.13139	0.00016246
dd_Smed_v6_58_0_1	COLEC11	Collectin-11	colec11	Collectin-11	Contig853	-0.45956	9.92217	0.179898	4.98511	10.7555	4.09e-43	5.20138	10.7555	6.95e-46
dd_Smed_v6_5800_0_1	OCA2	P protein	Oca2	P protein	PL06011A2B05	0.842764	7.08546	0.0305725	3.4257	4.87987	4.82e-22	3.0513	4.87987	4.38e-18
dd_Smed_v6_581_0_1	PPP6C	Serine/threonine-protein phosphatase 6 catalytic subunit	Ppp6c	Serine/threonine-protein phosphatase 6 catalytic subunit	Contig6080	0.812273	10.2952	0.0073658	1.36691	6.22076	3.22e-07	1.33116	6.22076	7.8e-07
dd_Smed_v6_5810_0_1	NA	NA	tlcd2	TLC domain-containing protein 2	Contig2964	1.46898	8.4114	7.72e-05	2.11515	5.39207	2.64e-12	1.65549	5.39207	5.49e-08
dd_Smed_v6_5815_0_1	VPS39	Vam6/Vps39-like protein	Vps39	Vam6/Vps39-like protein	Contig6026	0.470473	6.73743	0.0460753	1.67959	5.38598	3.19e-09	1.50224	5.38598	1.53e-07
dd_Smed_v6_583_0_1	NA	NA	NA	NA	Contig3985	3.49043	10.7245	2.64e-05	3.99968	9.60886	6.81e-29	3.96572	9.60886	1.88e-28
dd_Smed_v6_5845_0_1	ATXN7L3	Ataxin-7-like protein 3	ATXN7L3	Ataxin-7-like protein 3	Contig553	1.05962	8.2767	0.000408489	1.84366	3.85475	1.83e-06	1.83322	3.85475	2.39e-06
dd_Smed_v6_5857_0_1	PPP2R2A	Serine/threonine-protein phosphatase 2A 55 kDa regulatory subunit B alpha isoform	tws	Protein phosphatase PP2A 55 kDa regulatory subunit	Contig2436	0.570932	7.338	0.00147237	1.36503	4.72508	0.000305888	1.47476	4.72508	0.000101973
dd_Smed_v6_5867_0_1	HSD17B4	Peroxisomal multifunctional enzyme type 2	hsd17b4	Hydroxysteroid (17-beta) dehydrogenase 4	Contig6475	0.839915	7.17116	0.00585357	1.58539	4.02419	0.000213636	1.2315	4.02419	0.00560726
dd_Smed_v6_5886_0_1	CYB5D2	Neuferricin	cyb5d2	Neuferricin	Contig730	0.619586	7.39168	0.0166745	0.818432	4.90864	0.0262397	1.073	4.90864	0.002934
dd_Smed_v6_5888_0_1	-	Mucolipin 1 variant	Trpml	SD02261p	Contig1864	0.879266	7.16706	0.000381698	1.03444	4.19686	0.00388913	0.742455	4.19686	0.0537705
dd_Smed_v6_5902_0_1	CYP3A43/CYP3A4	Cytochrome P450	CYP3A43/CYP3A4	Cytochrome P450	Contig4117	0.748944	6.69863	0.000823059	3.58373	4.34221	2.27e-19	3.3584	4.34221	2.36e-17
dd_Smed_v6_5926_0_1	NA	NA	NA	NA	Contig4646	0.562594	6.69392	0.0060636	1.62589	4.37039	3.18e-05	1.97379	4.37039	4.43e-07
dd_Smed_v6_5932_0_1	MFN2	Mitofusin-2	mfn1a	Uncharacterized protein	Contig5699	0.531735	6.70721	0.0105105	2.45355	4.7707	1.28e-14	2.52164	4.7707	2.81e-15
dd_Smed_v6_5946_0_1	SYNGR2	Synaptogyrin-2	Syngr2	Synaptogyrin-2	Contig1892	1.80167	7.75163	0.00198308	2.16337	3.43383	9.66e-06	2.304	3.43383	2.81e-06
dd_Smed_v6_5951_0_1	NA	NA	NA	NA	Contig3176	1.04875	8.71822	0.000656337	1.39397	4.91082	6.77e-07	1.0259	4.91082	0.000386226
dd_Smed_v6_5954_0_1	SLC31A1	High affinity copper uptake protein 1	SLC31A1	High affinity copper uptake protein 1	Contig2150	0.0974415	7.05078	0.440751	2.68541	4.2312	8.63e-11	2.88763	4.2312	4.18e-12
dd_Smed_v6_597_0_1	NA	NA	NA	NA	Contig439	1.36896	10.7011	4.8e-05	5.73575	8.42709	2.94e-60	5.55571	8.42709	1.89e-57
dd_Smed_v6_5975_0_1	PPP2R2D	Serine/threonine-protein phosphatase 2A 55 kDa regulatory subunit B delta isoform	tws	Protein phosphatase PP2A 55 kDa regulatory subunit	Contig5677	0.569641	7.52151	0.0176745	1.13758	5.26009	0.000138749	0.850552	5.26009	0.00652337
dd_Smed_v6_5993_0_1	NA	NA	NA	NA	Contig6727	1.65858	7.63235	0.00348097	2.67722	3.78698	2.69e-09	2.55642	3.78698	1.52e-08
dd_Smed_v6_602_0_1	NPC2	Epididymal secretory protein E1	NPC2	Epididymal secretory protein E1	Contig6514	2.65434	11.078	0.000653169	1.0324	8.80245	0.000946274	0.807628	8.80245	0.0137796
dd_Smed_v6_6023_0_1	MORN4	MORN repeat-containing protein 4	Morn4	MORN repeat-containing protein 4	Contig7323	2.01511	7.44439	0.00152573	6.2767	3.59655	1.42e-21	6.30369	3.59655	1.19e-21
dd_Smed_v6_603_0_1	CALM1	Calmodulin 1 (Phosphorylase kinase, delta), isoform CRA_a	Calm3	Calmodulin-3	Contig2702	0.109167	8.43706	0.446174	2.23819	5.88693	0.00277671	2.91561	5.88693	0.000111995
dd_Smed_v6_6036_0_1	TEP1	Telomerase protein component 1	Tep1	Telomerase protein component 1	PL06019A2A11	0.0922116	6.19057	0.475429	3.78682	6.09775	1.1e-29	3.76192	6.09775	2.49e-29
dd_Smed_v6_6039_0_1	CSK	Tyrosine-protein kinase CSK	Csk	Tyrosine-protein kinase CSK	Contig7329	0.666053	7.66241	0.0121979	1.01991	5.03619	0.00257642	0.7694	5.03619	0.0322306
dd_Smed_v6_6044_0_1	GRTP1	Growth hormone-regulated TBC protein 1	GRTP1	Growth hormone-regulated TBC protein 1	Contig3221	2.25441	9.05441	2.91e-05	2.98484	2.96827	2.63e-07	2.76773	2.96827	1.97e-06
dd_Smed_v6_6045_0_1	LNP	Protein lunapark	LNP	Protein lunapark	Contig3120	1.11443	7.73137	0.000116017	1.98589	4.86315	4.64e-08	1.83497	4.86315	5.3e-07
dd_Smed_v6_6051_0_1	FAM109A	Sesquipedalian-1	FAM109A	Sesquipedalian-1	Contig3174	0.925561	7.52396	0.000636102	1.89601	4.56606	1.19e-07	1.71737	4.56606	1.97e-06
dd_Smed_v6_6053_1_1	NA	NA	NA	NA	Contig4574	0.885288	7.30512	0.000425118	1.96473	3.42358	2.26e-06	1.78781	3.42358	2.03e-05
dd_Smed_v6_6055_0_1	ATRAID	All-trans retinoic acid-induced differentiation factor	Atraid	All-trans retinoic acid-induced differentiation factor	Contig2869	1.71387	8.17073	7.25e-05	1.79835	5.89685	2.49e-09	1.64919	5.89685	5.68e-08
dd_Smed_v6_606_1_1	PGGHG	Protein-glucosylgalactosylhydroxylysine glucosidase	PGGHG	Protein-glucosylgalactosylhydroxylysine glucosidase	Contig4077	0.585421	6.55634	0.00250977	1.10908	5.38466	8.48e-05	1.18283	5.38466	2.94e-05
dd_Smed_v6_607_0_1	NA	NA	NA	NA	PL08008B2E06	1.02989	6.73643	0.00392329	2.59935	4.70899	1.14e-16	2.13247	4.70899	9.44e-12
dd_Smed_v6_607_1_1	TSPO	Translocator protein	Tspo	GH02075p	Contig4753	0.0915779	11.6239	0.514029	2.00074	8.6079	4.39e-07	1.99186	8.6079	5.83e-07
dd_Smed_v6_6076_0_1	NA	NA	NA	NA	PL030004B10B11	0.00152619	6.13589	0.138542	1.16528	4.66244	7.75e-05	0.896522	4.66244	0.00345226
dd_Smed_v6_6077_0_1	ABHD11	Protein ABHD11	abhd11	Protein ABHD11	Contig5837	0.380706	7.13909	0.0574321	1.38835	4.91404	2.22e-06	1.26717	4.91404	1.97e-05
dd_Smed_v6_608_0_1	NA	NA	NA	NA	Contig1491	3.53764	10.4529	3.58e-05	7.94337	6.0483	5.12e-19	8.01806	6.0483	3.39e-19
dd_Smed_v6_610_0_1	RAC1	Ras-related C3 botulinum toxin substrate 1	Rac1	Ras-related C3 botulinum toxin substrate 1	Contig5482	0.998693	7.40532	0.00546311	1.0797	7.07131	0.00022211	0.932479	7.07131	0.00191513
dd_Smed_v6_6107_0_1	TMEM106A	Transmembrane protein 106A	Tmem106a	Transmembrane protein 106A	PL04021A1B12	0.906154	7.96272	0.00416348	1.58803	3.53536	0.000564963	1.42893	3.53536	0.0024115
dd_Smed_v6_611_0_1	HEL70	Epididymis luminal protein 70	Moe	Moesin/ezrin/radixin homolog 1	Contig1780	1.30282	9.35447	0.000645636	1.22049	7.25624	0.000141405	1.47743	7.25624	3.88e-06
dd_Smed_v6_6156_0_1	DOCK1	Dedicator of cytokinesis protein 1	DOCK1	Dedicator of cytokinesis protein 1	Contig6189	0.768618	7.2533	0.023626	4.91705	5.57034	1.45e-42	4.83097	5.57034	2.19e-41
dd_Smed_v6_6168_0_1	FNTA	Protein farnesyltransferase/geranylgeranyltransferase type-1 subunit alpha	FNTA	Protein farnesyltransferase/geranylgeranyltransferase type-1 subunit alpha	Contig4682	0.274263	7.93115	0.0534429	1.16768	3.79244	0.00172245	0.886291	3.79244	0.0244338
dd_Smed_v6_6176_1_1	PLEKHF2	Pleckstrin homology domain-containing family F member 2	PLEKHF2	Pleckstrin homology domain-containing family F member 2	Contig2705	1.36989	8.55813	6.32e-05	2.33109	3.18177	3.11e-08	1.80745	3.18177	2.22e-05
dd_Smed_v6_619_0_1	ARPC3	Actin-related protein 2/3 complex subunit 3	Arpc3	Actin-related protein 2/3 complex subunit 3	Contig32	1.29531	9.79434	0.000573876	1.84748	5.18954	0.00019915	1.74843	5.18954	0.000513908
dd_Smed_v6_6200_0_1	NA	NA	raw	RAW	Contig7009	0.194424	6.62294	0.435195	1.68008	4.03409	0.000117133	1.17031	4.03409	0.0107182
dd_Smed_v6_623_0_1	ACTR2	Actin-related protein 2	Actr2	Actin-related protein 2	Contig701	1.39762	9.70131	4.45e-05	1.13607	8.38525	6.7e-05	1.00202	8.38525	0.000573086
dd_Smed_v6_6231_0_1	LATS1	Serine/threonine-protein kinase LATS1	lats1	LATS, large tumor suppressor, homolog 1 (Drosophila)	Contig6155	0.511018	7.63801	0.152778	1.04285	4.81938	0.00202765	1.07629	4.81938	0.00159678
dd_Smed_v6_6236_0_1	ADA	Adenosine deaminase	ada	Adenosine deaminase	Contig3895	2.06107	8.24756	6.51e-05	1.92844	4.27119	3.08e-07	1.57087	4.27119	3.96e-05
dd_Smed_v6_6251_0_1	PCDH1	Protocadherin-1	Pcdh1	Pcdh1 protein	Contig6309	-0.552993	7.5099	0.0509165	0.502622	4.07495	0.212861	1.48457	4.07495	2.33e-05
dd_Smed_v6_6276_0_1	PTPMT1	Phosphatidylglycerophosphatase and protein-tyrosine phosphatase 1	CELE_F28C6.8	Uncharacterized protein	Contig2508	1.05335	7.79633	0.00119848	2.20703	3.65118	0.000331144	1.79178	3.65118	0.00452213
dd_Smed_v6_6292_0_1	MTHFS	5-formyltetrahydrofolate cyclo-ligase	MTHFS	5-formyltetrahydrofolate cyclo-ligase	Contig4755	0.781019	8.23325	0.000802347	1.11519	4.73306	7.39e-05	0.945091	4.73306	0.00106206
dd_Smed_v6_63_0_1	COTL1	Coactosin-like protein	COTL1	Coactosin-like protein	Contig1384	2.60599	10.2085	8.78e-05	2.18884	10.9616	4.39e-09	2.09517	10.9616	2.29e-08
dd_Smed_v6_630_0_1	CHMP1B	Charged multivesicular body protein 1b	Chmp1	Charged multivesicular body protein 1, isoform A	Contig45	2.05977	10.2834	0.000101947	1.52418	7.03483	3.19e-06	1.41347	7.03483	1.91e-05
dd_Smed_v6_6305_0_1	MFSD11	UNC93-like protein MFSD11	Mfsd11	UNC93-like protein MFSD11	PL05002B2G09	1.37103	7.72003	0.00259159	2.52378	2.41365	2.86e-05	2.72963	2.41365	7.02e-06
dd_Smed_v6_6309_0_1	GNPTAB	N-acetylglucosamine-1-phosphotransferase subunits alpha/beta	gnptab	N-acetylglucosamine-1-phosphotransferase subunits alpha/beta	Contig2456	0.703722	6.76306	0.00138204	1.9909	3.50885	6.42e-07	2.0599	3.50885	2.94e-07
dd_Smed_v6_6320_0_1	ARHGAP24	Rho GTPase-activating protein 24	ARHGAP24	Rho GTPase-activating protein 24	PL06019B2H02	0.273446	6.31191	0.0641852	0.969343	3.47245	0.022889	1.10707	3.47245	0.00927337
dd_Smed_v6_6323_0_1	NPR2	Atrial natriuretic peptide receptor 2	CG31183	Guanylate cyclase	Contig4062	0.320267	6.66273	0.139835	1.43861	4.75436	3.16e-06	1.89223	4.75436	7.26e-10
dd_Smed_v6_634_0_1	NA	NA	rpz4	Zgc:113320	Contig2718	-0.861247	10.7351	0.00280274	7.3208	10.8431	1.69e-52	4.75715	10.8431	2.28e-28
dd_Smed_v6_6343_0_1	NA	NA	NA	NA	PL08010A1A04	0.77136	7.08925	0.0126609	1.29	5.08627	6.49e-05	1.03376	5.08627	0.00192383
dd_Smed_v6_6356_0_1	CARNMT1	Carnosine N-methyltransferase	CARNMT1	Carnosine N-methyltransferase	Contig4115	-0.0743418	8.48651	0.409145	1.20394	4.39037	0.00127999	0.681051	4.39037	0.103241
dd_Smed_v6_6359_0_1	NA	NA	NA	NA	PL06017A2E03	0.28488	7.25253	0.13364	1.64205	3.95837	2.19e-06	1.35586	3.95837	0.000122694
dd_Smed_v6_636_0_1	APOB	Apolipoprotein B-100	Apoltp	Apolipoprotein lipid transfer particle	Contig6249	0.599804	7.97313	0.0476535	5.87168	10.8555	1.56e-57	5.48485	10.8555	4.19e-52
dd_Smed_v6_6380_0_1	NA	NA	NA	NA	Contig1884	0.0926864	7.53142	0.500363	3.21914	3.58747	5.58e-07	3.15334	3.58747	1.07e-06
dd_Smed_v6_6387_0_1	LZTR1	Leucine-zipper-like transcriptional regulator 1	Lztr1	Leucine-zipper-like transcriptional regulator 1	Contig3743	0.647392	6.93672	0.00137175	1.69096	3.17333	0.000132071	1.35525	3.17333	0.00298758
dd_Smed_v6_639_2_1	MAP3K3	Mitogen-activated protein kinase kinase kinase 3	map3k3	Mitogen-activated protein kinase kinase kinase 3	Contig3109	0.661988	7.35175	0.00376642	1.39537	4.78061	0.000169469	0.988136	4.78061	0.0115663
dd_Smed_v6_6391_0_1	NA	NA	NA	NA	PL06004A2F11	0.339714	6.9375	0.0742479	2.04425	4.40022	1.19e-07	1.7993	4.40022	3.84e-06
dd_Smed_v6_6393_0_1	ABCB1	Multidrug resistance protein 1	Abcb1a	Multidrug resistance protein 1A	PL05002B2A01	0.691827	6.90282	0.00445513	1.62228	4.40869	1.45e-07	1.37406	4.40869	1.12e-05
dd_Smed_v6_6401_0_1	NA	NA	zgc:172139	Zgc:172139	PL06013B2G10	0.135539	6.55755	0.498042	1.88118	5.09631	1.13e-07	1.71406	5.09631	1.63e-06
dd_Smed_v6_6402_0_1	CAPN7	Calpain 7	Capn7	Calpain-7	PL06014B1B02	0.166134	6.32002	0.192416	2.01296	5.16233	4.7e-11	1.72165	5.16233	2.27e-08
dd_Smed_v6_6418_0_1	UBC	Polyubiquitin-C	ubb	Zgc:172187 protein	PL04004X1C01	0.793923	8.23847	0.00191492	1.38907	4.17424	0.000250549	1.37945	4.17424	0.000319082
dd_Smed_v6_643_0_1	NAGK	N-acetyl-D-glucosamine kinase	nagk	N-acetylglucosamine kinase	Contig877	0.957861	9.46727	0.179898	2.39326	8.33592	3.03e-13	2.18827	8.33592	2.72e-11
dd_Smed_v6_6440_0_1	D2HGDH	D-2-hydroxyglutarate dehydrogenase, mitochondrial	d2hgdh	D-2-hydroxyglutarate dehydrogenase, mitochondrial	PL05001B2E06	0.275013	7.59093	0.410368	1.35158	3.29233	0.00947179	1.64965	3.29233	0.00140629
dd_Smed_v6_645_0_1	ANK1	Ankyrin-1	ANK1	Ankyrin-1	PL08003A1F02	0.245364	7.0257	0.0802677	1.40275	7.79477	1.94e-06	1.15045	7.79477	0.000128674
dd_Smed_v6_6456_0_1	PIGK	GPI-anchor transamidase	CG4406	Putative GPI-anchor transamidase	Contig6087	-0.336525	7.59906	0.0422302	1.13934	3.78676	0.00448804	0.576871	3.78676	0.215558
dd_Smed_v6_6484_0_1	FAM172A	Protein FAM172A	Fam172a	Protein FAM172A	Contig5440	0.6486	7.41595	0.00970444	1.18247	3.2764	0.00601029	0.977891	3.2764	0.0299716
dd_Smed_v6_6504_0_1	RALGAPA2	Ral GTPase-activating protein subunit alpha-2	RALGAPA2	Ral GTPase-activating protein subunit alpha-2	PL08001B1A12	0.633854	7.0988	0.0421638	1.01932	4.60897	0.00321013	1.30768	4.60897	0.000124174
dd_Smed_v6_6529_0_1	GSS	Glutathione synthetase	gss	Glutathione synthetase	Contig1945	0.887989	7.39463	0.000966331	1.21346	5.14274	0.00209246	1.10834	5.14274	0.00615638
dd_Smed_v6_653_0_1	DUSP6	Dual specificity protein phosphatase 6	Dusp6	Dual specificity protein phosphatase 6	Contig6205	2.13271	10.7274	0.000791488	2.05713	5.77857	3.65e-05	1.73302	5.77857	0.000627229
dd_Smed_v6_6531_0_1	PSAP	Prosaposin	Sap-r	LD25144p	Contig6404	0.24556	6.68136	0.44746	3.46713	1.16612	0.00179497	3.61316	1.16612	0.00132491
dd_Smed_v6_6537_0_1	OXR1	Oxidation resistance protein 1	Tldc2	TLD domain-containing protein 2	Contig4875	0.845911	7.60453	0.00105068	2.19186	4.65517	4.58e-10	2.01283	4.65517	1.21e-08
dd_Smed_v6_6547_0_1	NA	NA	NA	NA	Contig1720	1.53611	7.98518	8.63e-05	6.98845	5.17175	5.89e-55	6.98522	5.17175	7.78e-55
dd_Smed_v6_6549_0_1	NA	NA	NA	NA	Contig3616	0.23351	7.13324	0.136988	1.63336	4.02269	0.000495864	1.35285	4.02269	0.00518239
dd_Smed_v6_6550_0_1	MOGAT2	2-acylglycerol O-acyltransferase 2	mogat2	Mogat2 protein	Contig5997	0.807404	8.03794	0.0245874	3.61276	2.02063	1.62e-05	3.79499	2.02063	7.4e-06
dd_Smed_v6_6560_0_1	NA	NA	NA	NA	Contig7182	0.685576	6.20734	0.00484494	2.98368	3.23368	1.73e-06	2.97333	3.23368	2.17e-06
dd_Smed_v6_6577_0_1	DST	Dystonin	Dst	Dystonin	PL06022A1E08	0.059378	6.16791	0.586874	4.36329	5.39348	1.89e-34	4.46189	5.39348	1.14e-35
dd_Smed_v6_6578_0_1	DDR2	Discoidin domain-containing receptor 2	Ddr	Discoidin domain receptor, isoform F	Contig3618	1.43013	7.25184	0.00039953	3.0718	5.45422	5.69e-23	3.05247	5.45422	1.11e-22
dd_Smed_v6_6580_0_1	NA	NA	NA	NA	Contig7368	0.928826	7.41921	0.0151313	1.05718	4.00704	0.0150602	1.36923	4.00704	0.00133255
dd_Smed_v6_6588_0_1	RAB9B	Ras-related protein Rab-9B	RAB9B	Ras-related protein Rab-9B	Contig5949	2.7768	9.67828	0.00064886	7.05709	4.04267	1.57e-28	7.33574	4.04267	3.87e-30
dd_Smed_v6_6592_0_1	NA	NA	NA	NA	PL08003A1D04	0.645963	6.63203	0.00523858	3.05622	2.02911	0.00258195	3.36063	2.02911	0.00108142
dd_Smed_v6_66_0_1	KLK13	Kallikrein-13	Gzmm	Gzmm protein	Contig5733	-0.775355	12.5293	0.0230834	10.0425	7.72773	1.08e-42	6.03956	7.72773	1.52e-21
dd_Smed_v6_6619_0_1	TMC5	Transmembrane channel-like protein 5	Tmc4	Transmembrane channel-like protein 4	Contig5514	1.99562	7.83619	9.8e-05	3.00509	2.79702	7.74e-08	2.82303	2.79702	4.84e-07
dd_Smed_v6_662_0_1	GPX4	Phospholipid hydroperoxide glutathione peroxidase, mitochondrial	GPX4	Phospholipid hydroperoxide glutathione peroxidase, mitochondrial	Contig6064	1.43293	11.0493	0.00184698	2.34184	7.20271	3.56e-16	2.17997	7.20271	3.26e-14
dd_Smed_v6_6627_0_1	STAMBPL1	AMSH-like protease	stambpb	STAM-binding protein b	Contig6312	0.595659	6.97798	0.0404551	1.04174	3.74959	0.00685952	1.35504	3.74959	0.000338706
dd_Smed_v6_6647_0_1	LIMS1	LIM and senescent cell antigen-like-containing domain protein 1	stck	LIM domain-containing protein	Contig6097	-0.193157	8.69504	0.195685	1.17115	4.39424	0.000132135	1.09948	4.39424	0.000409059
dd_Smed_v6_6653_0_1	NA	NA	NA	NA	Contig3595	0.226882	8.28187	0.29245	1.04172	4.29605	0.00759875	1.39424	4.29605	0.00026435
dd_Smed_v6_6663_0_1	SLC5A1	Sodium/glucose cotransporter 1	slc5a9	Sodium/glucose cotransporter 4	PL05005B2B08	0.705551	7.14025	0.00578229	4.11358	3.67485	7.9e-25	3.56608	3.67485	1.56e-19
dd_Smed_v6_667_0_1	UBE2L3	Ubiquitin-conjugating enzyme E2 L3	ube2l3a	Ubiquitin-conjugating enzyme E2L 3	Contig2721	0.462916	9.41399	0.0495401	1.3859	5.99874	4.1e-05	1.27397	5.99874	0.000201911
dd_Smed_v6_6676_0_1	NA	NA	NA	NA	Contig2765	1.07172	7.99248	0.000202056	1.40731	4.64404	7.45e-05	1.72161	4.64404	1.19e-06
dd_Smed_v6_6677_0_1	FTH1	Ferritin	zgc:109934	Ferritin	Contig3219	1.08635	8.68374	0.000592471	6.0672	4.8499	1.12e-42	5.95306	4.8499	1.9e-41
dd_Smed_v6_6680_0_1	RMDN2	Regulator of microtubule dynamics protein 2	Rmdn3	Regulator of microtubule dynamics protein 3	Contig7670	0.417909	7.43441	0.340278	1.31961	3.69222	0.000736386	0.957041	3.69222	0.0208376
dd_Smed_v6_6687_0_1	NA	NA	NA	NA	Contig1524	1.77654	7.83809	0.00022185	6.2085	4.98921	1.12e-43	6.20347	4.98921	1.42e-43
dd_Smed_v6_6691_0_1	SLC15A4	Solute carrier family 15 member 4	SLC15A4	Solute carrier family 15 member 4	Contig4894	0.537717	6.66812	0.0495716	1.98634	4.37289	6.72e-07	2.20675	4.37289	3.88e-08
dd_Smed_v6_670_0_1	TMEM14C	Transmembrane protein 14C	tmem14cb	Zgc:103519	Contig7015	0.294926	9.96139	0.36655	1.09786	7.5768	9.53e-05	0.80397	7.5768	0.00643663
dd_Smed_v6_6705_0_1	NA	NA	NA	NA	Contig6825	1.05873	7.57889	0.00772749	1.58048	4.30427	6.9e-05	1.63017	4.30427	4.56e-05
dd_Smed_v6_6707_0_1	NA	NA	NA	NA	Contig1153	-0.322158	6.70089	0.300772	2.37262	3.62831	6.92e-07	2.18967	3.62831	5.36e-06
dd_Smed_v6_6714_0_1	NA	NA	NA	NA	Contig2377	1.12216	6.74687	0.00054994	4.79858	4.30227	3.76e-38	4.59306	4.30227	1.54e-35
dd_Smed_v6_6717_0_1	ABHD13	Protein ABHD13	Bem46	Bem46	PL08003B2H10	0.20948	8.1515	0.261862	1.33502	4.84226	4.2e-05	1.39657	4.84226	2.01e-05
dd_Smed_v6_6719_0_1	PLCG1	1-phosphatidylinositol 4,5-bisphosphate phosphodiesterase gamma-1	Plcg1	1-phosphatidylinositol 4,5-bisphosphate phosphodiesterase gamma-1	Contig4473	1.10485	7.16229	0.204322	1.63917	5.30861	2.81e-08	1.74646	5.30861	3.6e-09
dd_Smed_v6_6722_0_1	NA	NA	NA	NA	Contig3751	1.30228	8.2615	0.000204618	1.94064	4.98872	2.16e-11	1.76785	4.98872	1.31e-09
dd_Smed_v6_6727_0_1	MGLL	Monoglyceride lipase	Mgll	Monoglyceride lipase	Contig4864	1.90241	7.78797	7.81e-05	3.24223	3.23623	5.26e-09	3.21161	3.23623	8.47e-09
dd_Smed_v6_6739_0_1	MPDZ	Multiple PDZ domain protein	MPDZ	Multiple PDZ domain protein	PL06021A2H07	-0.0625675	6.32361	0.641696	1.0345	3.25531	0.0382309	1.50201	3.25531	0.00188096
dd_Smed_v6_6768_0_1	TRAF3	TNF receptor-associated factor 3	traf3	TNF receptor-associated factor 3	Contig1753	1.28178	7.03179	0.00214822	2.85941	3.80738	1.95e-10	3.24187	3.80738	9.24e-13
dd_Smed_v6_6785_1_1	NA	NA	NA	NA	PL08005B1E10	1.96802	8.53004	0.000654081	7.32488	2.62545	8.52e-10	7.19674	2.62545	1.71e-09
dd_Smed_v6_6792_0_1	SLC31A1	High affinity copper uptake protein 1	slc31a1	High affinity copper uptake protein	Contig5836	1.8714	8.31881	9.96e-05	5.39819	4.77194	3.2e-51	5.34633	4.77194	1.95e-50
dd_Smed_v6_6796_0_1	MGLL	Monoglyceride lipase	Mgll	Monoglyceride lipase	Contig4394	1.15093	7.43725	0.000232969	2.28152	2.80445	1.62e-06	2.23368	2.80445	3.06e-06
dd_Smed_v6_6802_0_1	CNP	2',3'-cyclic-nucleotide 3'-phosphodiesterase	cnp	2',3'-cyclic nucleotide 3' phosphodiesterase	Contig6102	-0.299454	7.93796	0.191625	3.13111	5.59995	1.84e-20	2.22777	5.59995	2.22e-11
dd_Smed_v6_6817_0_1	ALG11	GDP-Man:Man(3)GlcNAc(2)-PP-Dol alpha-1,2-mannosyltransferase	ALG11	GDP-Man:Man(3)GlcNAc(2)-PP-Dol alpha-1,2-mannosyltransferase	Contig734	0.121825	7.70881	0.500844	1.89189	3.78649	3.04e-08	1.09555	3.78649	0.00219315
dd_Smed_v6_6819_0_1	A4GNT	Alpha-1,4-N-acetylglucosaminyltransferase	NA	NA	Contig5956	1.34186	7.05424	0.00104761	5.29211	3.91143	5.03e-16	4.97695	3.91143	1.42e-14
dd_Smed_v6_6826_0_1	NA	NA	NA	NA	PL05003B1E09	-0.0456842	6.50599	0.263059	1.32022	2.78208	0.0170707	1.71369	2.78208	0.00165733
dd_Smed_v6_6827_0_1	ALDH9A1	4-trimethylaminobutyraldehyde dehydrogenase	aldh9a1a	Aldehyde dehydrogenase family 9 member A1-A	PL05003B1H11	0.048279	7.02082	0.69709	2.17635	2.90359	7.13e-05	1.94381	2.90359	0.000470987
dd_Smed_v6_683_0_1	NA	NA	NA	NA	Contig3806	1.18834	7.59238	0.00117248	1.73569	7.629	8.95e-07	1.45973	7.629	4.63e-05
dd_Smed_v6_6831_0_1	KMO	Kynurenine 3-monooxygenase	kmo	Kynurenine 3-monooxygenase	Contig4238	-0.262638	6.62724	0.0927776	1.3147	4.61536	0.000106771	1.89257	4.61536	1.81e-08
dd_Smed_v6_6833_0_1	ADO	2-aminoethanethiol dioxygenase	adob	2-aminoethanethiol (cysteamine) dioxygenase b	Contig5247	0.690124	7.97438	0.00572449	1.16467	3.95131	0.00178569	0.835876	3.95131	0.0357191
dd_Smed_v6_6837_0_1	NA	NA	Nudt17	Nucleoside diphosphate-linked moiety X motif 17	Contig856	0.346817	6.58304	0.039912	1.44387	2.87028	0.00931125	1.32479	2.87028	0.0205134
dd_Smed_v6_684_0_1	ATP6V1B2	V-type proton ATPase subunit B, brain isoform	Vha55	V-type proton ATPase subunit B	Contig6462	2.30541	10.8691	0.000697745	1.54987	9.05401	2.01e-07	1.38341	9.05401	4.47e-06
dd_Smed_v6_6843_0_1	PLPP1	Phospholipid phosphatase 1	PLPP1	Phospholipid phosphatase 1	Contig2908	0.675641	6.67171	0.0170576	1.88276	4.56555	5.06e-09	1.67067	4.56555	2.73e-07
dd_Smed_v6_6848_0_1	SLC29A1	Equilibrative nucleoside transporter 1	SLC29A1	Equilibrative nucleoside transporter 1	Contig3863	1.14175	7.74397	0.000521131	2.20843	5.31897	5.05e-15	1.66594	5.31897	4.23e-09
dd_Smed_v6_6853_0_1	DDR1	Epithelial discoidin domain-containing receptor 1	smal	Uncharacterized protein, isoform C	Contig2554	0.834461	7.12108	0.000355365	2.60106	3.5171	1.98e-10	2.47028	3.5171	1.72e-09
dd_Smed_v6_6860_0_1	NA	NA	NA	NA	Contig2447	0.790807	6.50978	0.205234	2.94358	5.13829	8.04e-21	2.83313	5.13829	1.89e-19
dd_Smed_v6_6869_0_1	PTF1A	Pancreas transcription factor 1 subunit alpha	Fer1	48 related 1, isoform A	Contig6499	-0.274241	6.62849	0.254606	4.2418	2.29092	8.23e-07	4.21229	2.29092	1.12e-06
dd_Smed_v6_687_0_1	PPP2R1A	Serine/threonine-protein phosphatase 2A 65 kDa regulatory subunit A alpha isoform	PPP2R1A	Serine/threonine-protein phosphatase 2A 65 kDa regulatory subunit A alpha isoform	PL06010A2H09	0.332249	6.37236	0.0303449	1.2424	7.82792	2.2e-05	1.13135	7.82792	0.000140479
dd_Smed_v6_6887_0_1	NRXN3	Neurexin-3	Crb1	Protein crumbs homolog 1	Contig1460	0.602209	6.75474	0.00155932	1.07384	3.65826	0.0118496	1.31813	3.65826	0.0017576
dd_Smed_v6_690_0_1	argBPIB	ArgBPIB protein	argBPIB	ArgBPIB protein	Contig4439	2.10313	9.84913	5.24e-05	3.42891	8.87844	1.72e-28	3.27351	8.87844	2.5e-26
dd_Smed_v6_6917_0_1	SUSD2	Sushi domain-containing protein 2	Susd2	Sushi domain-containing protein 2	PL06004B1C06	0.652062	7.02466	0.0131089	6.35703	4.55172	4.9e-52	6.16976	4.55172	1.13e-49
dd_Smed_v6_6928_0_1	PTPN4	Tyrosine-protein phosphatase non-receptor type 4	PTPN4	Tyrosine-protein phosphatase non-receptor type 4	Contig4739	0.515202	6.65091	0.00776399	1.30361	4.71327	3.19e-05	0.981672	4.71327	0.00255727
dd_Smed_v6_6967_0_1	PRKG1	cGMP-dependent protein kinase 1	egl-4	cGMP-dependent protein kinase egl-4	Contig5488	0.737186	6.35688	0.428896	4.15324	4.51579	5.64e-21	3.82991	4.51579	2.3e-18
dd_Smed_v6_6969_0_1	NA	NA	pck	EG:80H7.2 protein	Contig4107	0.376019	6.94653	0.0292892	1.84077	3.60747	1.8e-05	1.43073	3.60747	0.00116054
dd_Smed_v6_6980_0_1	SMCR8	Guanine nucleotide exchange protein SMCR8	smcr8b	Guanine nucleotide exchange protein smcr8b	Contig4240	0.920893	6.77634	0.059181	2.61754	3.92381	1.36e-13	2.41462	3.92381	9.01e-12
dd_Smed_v6_6983_0_1	MAP3K3	Mitogen-activated protein kinase kinase kinase 3	map3k3	Mitogen-activated protein kinase kinase kinase 3	Contig6955	1.02517	7.41776	0.00366843	1.54007	4.04726	4.59e-06	1.45466	4.04726	1.79e-05
dd_Smed_v6_699_0_1	AK3	GTP:AMP phosphotransferase AK3, mitochondrial	ak3	GTP:AMP phosphotransferase AK3, mitochondrial	Contig1038	1.20011	10.2865	0.00167305	1.66705	7.37227	3.71e-09	1.70751	7.37227	1.82e-09
dd_Smed_v6_6998_0_1	NA	NA	NA	NA	PL030017A20F02	1.01227	6.89821	0.0035745	6.61001	3.60534	5.09e-27	6.65093	3.60534	3.1e-27
dd_Smed_v6_7000_0_1	GGACT	Gamma-glutamylaminecyclotransferase	GGACT	Gamma-glutamylaminecyclotransferase	Contig2500	0.85389	7.39295	0.000913415	2.05451	2.62756	0.000199252	2.33997	2.62756	2.45e-05
dd_Smed_v6_7035_0_1	NA	NA	NA	NA	Contig3682	1.13764	7.60041	0.000304577	1.85128	5.12668	4.64e-08	1.50851	5.12668	1.11e-05
dd_Smed_v6_704_0_1	NPC2	Epididymal secretory protein E1	NPC2	Epididymal secretory protein E1	Contig4028	-0.990969	10.3575	0.00147511	5.84102	8.74923	2.62e-45	6.49768	8.74923	1.43e-52
dd_Smed_v6_7052_0_1	RAB5B	Ras-related protein Rab-5B	Rab5c	Ras-related protein Rab-5C	Contig7318	1.64692	7.48865	0.00105817	2.37587	4.27178	1.01e-09	2.26348	4.27178	6.76e-09
dd_Smed_v6_7056_0_1	ACF	Apobec-1 complementation factor, isoform CRA_b	rbm47	RNA-binding motif protein 47	PL06017A2G09	0.428593	6.79626	0.0324717	2.00479	3.87593	1.95e-06	2.45844	3.87593	6.18e-09
dd_Smed_v6_7058_0_1	SSH1	Protein phosphatase Slingshot homolog 1	Ssh1	Protein phosphatase Slingshot homolog 1	PL05006A1C02	1.03527	7.06257	0.00246662	1.21966	4.37279	0.000434779	0.94844	4.37279	0.0088701
dd_Smed_v6_7072_0_1	TBC1D13	TBC1 domain family member 13	Tbc1d13	TBC1 domain family member 13	Contig3342	1.46997	8.82926	0.000211758	2.02218	4.08602	4.45e-09	1.94189	4.08602	2.1e-08
dd_Smed_v6_7076_0_1	NA	NA	NA	NA	Contig367	1.67906	7.03452	0.000589152	5.43658	2.90082	1.36e-07	5.77898	2.90082	3.58e-08
dd_Smed_v6_7077_0_1	MFSD12	Major facilitator superfamily domain-containing protein 12	mfsd12a	Major facilitator superfamily domain-containing 12a	Contig722	1.7539	8.3487	7.58e-05	3.08427	2.3367	0.000813733	3.10163	2.3367	0.000875961
dd_Smed_v6_7096_0_1	LOXL2	Lysyl oxidase homolog 2	lox2	Lysyl oxidase-like 2	PL06010A2D02	0.667332	6.42939	0.0357484	5.28263	6.02612	8.63e-44	5.17946	6.02612	1.8e-42
dd_Smed_v6_7098_0_1	MAOB	Amine oxidase [flavin-containing] B	MAOB	Amine oxidase [flavin-containing] B	PL08003B2E03	1.22981	6.92414	0.00797825	2.4933	4.30185	3.39e-12	2.1249	4.30185	3.23e-09
dd_Smed_v6_71_0_1	APLP2	Amyloid-like protein 2	Wfikkn2	WAP, Kazal, immunoglobulin, Kunitz and NTR domain-containing protein 2	Contig941	-0.984787	11.8846	0.00712607	5.64357	11.9987	1.54e-44	6.96646	11.9987	1.36e-59
dd_Smed_v6_7100_0_1	TMEM104	Transmembrane protein 104	CG5262	Transmembrane protein 104 homolog	Contig3111	1.82005	8.39313	2.69e-05	3.51355	5.04084	6.38e-17	3.1702	5.04084	3.02e-14
dd_Smed_v6_7104_0_1	SLC26A11	Sodium-independent sulfate anion transporter	slc26a11	Solute carrier family 26 (anion exchanger), member 11	Contig2366	1.55113	7.30983	0.000158442	2.05986	4.47841	1.23e-11	1.98363	4.47841	7.86e-11
dd_Smed_v6_7105_0_1	SNTB1	Beta-1-syntrophin	Sntb1	Beta-1-syntrophin	PL06002X1A12	0.575181	7.35817	0.027938	2.26659	5.35553	7.05e-12	2.18988	5.35553	4e-11
dd_Smed_v6_7121_0_1	SLC24A5	Sodium/potassium/calcium exchanger 5	slc24a5	Sodium/potassium/calcium exchanger 5	PL06017B2C01	0.712669	7.23183	0.00983567	6.0094	5.17555	6.14e-50	5.68007	5.17555	7.23e-46
dd_Smed_v6_7138_0_1	NA	NA	NA	NA	PL05001B1A02	0.810818	6.62761	0.00508752	1.19938	4.90772	0.000352029	0.981583	4.90772	0.00475768
dd_Smed_v6_7140_0_1	NA	NA	NA	NA	Contig7103	0.730086	6.75001	0.0155662	2.99721	5.19048	2.7e-23	2.66607	5.19048	5.68e-19
dd_Smed_v6_7143_0_1	IPPK	Inositol-pentakisphosphate 2-kinase	ippk	Inositol-pentakisphosphate 2-kinase	PL06017A2B09	0.282638	6.32919	0.154639	1.05323	4.23759	0.00324979	0.861905	4.23759	0.0214371
dd_Smed_v6_7147_0_1	APRT	Adenine phosphoribosyltransferase	APRT	Adenine phosphoribosyltransferase	Contig7116	0.507238	7.0021	0.0253911	2.07496	3.21094	0.00247618	2.16418	3.21094	0.00179001
dd_Smed_v6_7156_0_1	NA	NA	NA	NA	Contig482	0.861358	6.75964	0.00154987	6.88308	3.91223	1.55e-34	6.78117	3.91223	9.73e-34
dd_Smed_v6_7165_0_1	NA	NA	NA	NA	Contig6781	1.67931	8.20792	0.00255833	4.12993	3.35579	3.74e-11	4.109	3.35579	5.43e-11
dd_Smed_v6_7171_0_1	NA	NA	NA	NA	Contig5471	0.118205	6.95895	0.379918	3.34128	3.17965	1.79e-14	2.87952	3.17965	3.16e-11
dd_Smed_v6_7184_0_1	B4GALT2	Beta-1,4-galactosyltransferase 2	B4GALT2	Beta-1,4-galactosyltransferase 2	Contig1939	0.787334	7.37384	0.00319896	2.41595	3.00789	3.55e-05	2.55304	3.00789	1.45e-05
dd_Smed_v6_7198_0_1	KDSR	3-ketodihydrosphingosine reductase	e	Ebony	Contig4963	-0.202495	6.48814	0.176824	1.6971	4.40525	1.2e-07	1.39687	4.40525	1.77e-05
dd_Smed_v6_72_0_1	NA	NA	NA	NA	Contig7099	-1.28954	10.9659	0.00453891	7.60417	10.9554	6.25e-54	4.94589	10.9554	2.14e-29
dd_Smed_v6_7200_0_1	SAT2	Diamine acetyltransferase 2	sat1a.2	Spermidine/spermine N1-acetyltransferase 1	Contig7555	2.12036	8.56539	0.00135022	2.49744	4.04725	2.26e-09	2.68099	4.04725	1.79e-10
dd_Smed_v6_7205_0_1	CIB2	Calcium and integrin-binding family member 2	Cib1	Calcium and integrin-binding protein 1	Contig7485	1.76407	7.28218	0.00276543	10.5119	2.47293	3.08e-19	10.8952	2.47293	2.23e-20
dd_Smed_v6_7218_0_1	NA	NA	FR	FMRFamide receptor	Contig4228	0.162942	6.24478	0.235732	1.93452	4.39788	1.27e-09	1.64898	4.39788	2.95e-07
dd_Smed_v6_722_0_1	LAMP1	Lysosome-associated membrane glycoprotein 1	Lamp1	Lysosome-associated membrane glycoprotein 1	Contig1891	2.07491	9.93527	2.88e-05	1.76137	7.8762	1.14e-09	1.60856	7.8762	3.36e-08
dd_Smed_v6_7220_0_1	TPPP3	Tubulin polymerization-promoting protein family member 3	Tppp	Tubulin polymerization-promoting protein	Contig1224	0.140805	6.56704	0.368249	4.02428	2.86726	5.77e-08	2.46867	2.86726	0.000747751
dd_Smed_v6_7235_0_1	GGPS1	Geranylgeranyl pyrophosphate synthase	Ggps1	Geranylgeranyl pyrophosphate synthase	Contig204	0.1317	6.6961	0.458884	1.78532	2.12799	0.0150842	1.94731	2.12799	0.00851867
dd_Smed_v6_725_0_1	HADH	Hydroxyacyl-coenzyme A dehydrogenase, mitochondrial	Hadh	Hydroxyacyl-coenzyme A dehydrogenase, mitochondrial	Contig400	-0.0814925	6.42669	0.191049	1.52903	8.16404	5.59e-07	1.33223	8.16404	1.68e-05
dd_Smed_v6_7256_0_1	NA	NA	Ssadh	GH21316p	Contig5113	-0.0508008	7.66404	0.79214	1.32602	4.29365	0.000263791	1.4426	4.29365	7.56e-05
dd_Smed_v6_726_0_1	NA	NA	NA	NA	Contig933	-1.23381	8.40677	0.00140239	2.43027	5.13698	2.04e-13	2.36034	5.13698	1.07e-12
dd_Smed_v6_7289_0_1	NA	NA	CG10527	Uncharacterized protein	Contig7290	0.559614	7.49084	0.0122673	1.93457	5.29979	5.05e-12	1.69636	5.29979	1.77e-09
dd_Smed_v6_73_0_1	NPC2	Epididymal secretory protein E1	Npc2	Epididymal secretory protein E1	Contig1670	-0.746382	11.5387	0.0354104	6.41458	10.1581	4.27e-48	5.35295	10.1581	4.32e-37
dd_Smed_v6_7301_0_1	RGR	RPE-retinal G protein-coupled receptor	RGR	RPE-retinal G protein-coupled receptor	Contig5343	-0.275465	7.83042	0.163887	1.51176	4.29912	0.00125699	1.33547	4.29912	0.00557322
dd_Smed_v6_7336_0_1	FIG4	Polyphosphoinositide phosphatase	FIG4	Polyphosphoinositide phosphatase	PL06022B2E07	0.110441	6.08771	0.30667	1.32191	4.26396	5.05e-05	1.23769	4.26396	0.000178625
dd_Smed_v6_7337_0_1	VPS33B	Vacuolar protein sorting-associated protein 33B	vps33b	Vacuolar protein sorting-associated protein 33B	PL05002B1G10	0.664258	7.44894	0.0158511	0.84475	4.43119	0.0206068	1.19957	4.43119	0.000688274
dd_Smed_v6_7338_0_1	NA	NA	NA	NA	Contig452	2.35073	8.28137	3.48e-05	3.76077	4.80595	1.92e-23	3.88428	4.80595	1.08e-24
dd_Smed_v6_7339_0_1	NA	NA	CELE_Y59A8B.21	Uncharacterized protein	PL08003A2C11	1.64353	9.01224	0.000712733	3.09845	4.25577	5.78e-10	3.08087	4.25577	8.47e-10
dd_Smed_v6_734_0_1	NA	NA	unc-9	Innexin unc-9	Contig5492	2.30357	9.31091	8.01e-05	6.57201	9.12644	6.12e-69	6.33712	9.12644	2.01e-65
dd_Smed_v6_7354_0_1	CLN3	Battenin	cln3	Battenin	PL06009B2H09	0.25801	7.64406	0.287523	1.40636	5.37812	4.67e-06	1.44577	5.37812	2.81e-06
dd_Smed_v6_7359_0_1	LAMC1	Laminin subunit gamma-1	Lamc1	Laminin subunit gamma-1	PL08001A2F12	0.722695	7.53414	0.014268	3.6066	3.34358	2.65e-15	3.68558	3.34358	8.33e-16
dd_Smed_v6_736_0_1	NA	NA	NA	NA	Contig253	1.55778	11.37	0.000165687	6.32258	6.93159	6.39e-35	6.48445	6.93159	3.74e-36
dd_Smed_v6_7367_0_1	PI4K2A	Phosphatidylinositol 4-kinase type 2-alpha	pi4k2b	Phosphatidylinositol 4-kinase type 2-beta	Contig6934	0.630902	6.94313	0.00639863	2.17912	3.85686	1.62e-07	1.55751	3.85686	0.000239488
dd_Smed_v6_7369_0_1	GLTPD1	Ceramide-1-phosphate transfer protein	GLTPD1	Ceramide-1-phosphate transfer protein	Contig2633	1.76557	8.88228	0.000106873	1.86019	5.10028	4.94e-10	1.9805	5.10028	3.99e-11
dd_Smed_v6_7384_0_1	DHTKD1	Probable 2-oxoglutarate dehydrogenase E1 component DHKTD1, mitochondrial	DHTKD1	Probable 2-oxoglutarate dehydrogenase E1 component DHKTD1, mitochondrial	Contig3466	0.0606576	6.09414	0.63646	1.18055	4.08362	0.00484675	1.18394	4.08362	0.00533008
dd_Smed_v6_7388_0_1	TSTD1	Thiosulfate sulfurtransferase/rhodanese-like domain-containing protein 1	TSTD1	Thiosulfate sulfurtransferase/rhodanese-like domain-containing protein 1	Contig2105	0.00158533	6.99924	0.452413	1.22545	4.2009	0.00902064	1.12012	4.2009	0.0206496
dd_Smed_v6_7407_0_1	ZFYVE1	Zinc finger FYVE domain-containing protein 1	mKIAA1589	MKIAA1589 protein	Contig4387	0.392535	7.20693	0.0143755	1.03318	4.79481	0.00469422	0.608582	4.79481	0.136913
dd_Smed_v6_7411_0_1	NA	NA	NA	NA	Contig3181	0.621034	7.30578	0.00339815	1.98567	4.36957	1.63e-06	2.20471	4.36957	1.16e-07
dd_Smed_v6_743_0_1	-	PLAC8 protein	Plac8	Placenta-specific gene 8 protein	Contig671	2.15808	10.7229	4.56e-05	1.60679	8.61653	4.07e-08	1.48481	8.61653	4.93e-07
dd_Smed_v6_7447_0_1	SLC6A1	Sodium- and chloride-dependent GABA transporter 1	SerT	Sodium-dependent serotonin transporter	Contig1620	1.17055	7.05691	0.000575358	4.12773	4.86891	2.42e-35	3.5353	4.86891	2.44e-27
dd_Smed_v6_7461_0_1	NA	NA	NA	NA	Contig2310	1.65755	7.37957	0.000300316	2.26511	4.95742	2.37e-16	2.30454	4.95742	8.02e-17
dd_Smed_v6_7470_0_1	GLI3	Transcriptional activator GLI3	ci	Transcriptional activator cubitus interruptus	PL04007A1E03	0.0901216	6.38848	0.395253	1.78031	3.91045	1.47e-07	1.90297	3.91045	2.08e-08
dd_Smed_v6_7474_0_1	SLC16A4	Monocarboxylate transporter 5	slc16a8	Solute carrier family 16 (monocarboxylate transporter), member 8	PL05015B2E08	0.425975	7.82803	0.100893	1.07607	4.31407	0.00224246	0.720387	4.31407	0.059551
dd_Smed_v6_7485_0_1	NA	NA	NA	NA	PL05001B1F07	0.286145	7.00646	0.047486	1.86733	2.86573	6.6e-05	1.10525	2.86573	0.0279213
dd_Smed_v6_7487_0_1	RNF31	E3 ubiquitin-protein ligase RNF31	RNF31	E3 ubiquitin-protein ligase RNF31	PL06013A1E03	-0.0159189	6.64712	0.156495	1.517	2.925	0.00125741	1.46935	2.925	0.00210233
dd_Smed_v6_749_0_1	PLS3	Plastin-3	Fim	FI19014p1	Contig5904	2.00683	8.78279	0.000711681	2.05941	7.70694	3.46e-11	2.06909	7.70694	3.33e-11
dd_Smed_v6_75_0_1	NA	NA	CG3884	RE21371p	Contig1248	4.49447	13.1958	2.29e-05	6.4837	13.5841	5.97e-46	6.38976	13.5841	5.67e-45
dd_Smed_v6_7521_0_1	ZDHHC24	Probable palmitoyltransferase ZDHHC24	CG10344	Palmitoyltransferase	Contig3013	-0.524816	7.43863	0.0102927	1.93415	5.52733	1.49e-12	1.7347	5.52733	2.65e-10
dd_Smed_v6_7534_0_1	NA	NA	NA	NA	PL030009B10H11	0.677276	7.04223	0.0107059	2.69131	3.6644	3.27e-13	2.49293	3.6644	1.58e-11
dd_Smed_v6_7541_0_1	TMPRSS15	Enteropeptidase	CG4386	CG4386	Contig826	0.0848499	6.90429	0.628707	5.19252	3.82356	1.04e-31	6.1289	3.82356	3.3e-41
dd_Smed_v6_7565_0_1	PRKAG3	5'-AMP-activated protein kinase subunit gamma-3	prkag1	Protein kinase, AMP-activated, gamma 1 non-catalytic subunit	PL06014B1H03	0.453731	7.08182	0.0194377	4.05664	5.42413	2.4e-35	3.83064	5.42413	3.59e-32
dd_Smed_v6_7577_0_1	PDE4D	Phosphodiesterase	pde4ca	Phosphodiesterase	Contig2158	2.4586	8.3259	2.78e-05	6.51195	5.62251	5.64e-54	6.25194	5.62251	7.75e-51
dd_Smed_v6_7587_0_1	CBR4	Carbonyl reductase family member 4	zgc:92630	Zgc:92630	Contig6069	1.62135	8.03957	0.000823031	5.69176	4.48763	1.81e-25	5.7274	4.48763	1.15e-25
dd_Smed_v6_7593_0_1	NOL4L	Nucleolar protein 4-like	Nol4l	Nucleolar protein 4-like	Contig3368	0.180709	5.90764	0.506819	0.522219	3.88844	0.256875	1.19975	3.88844	0.00342064
dd_Smed_v6_762_0_1	GLIPR2	Golgi-associated plant pathogenesis-related protein 1	CG31482	Uncharacterized protein	Contig4276	1.48575	8.59289	0.000221149	2.20762	7.64164	1.75e-11	1.965	7.64164	2.44e-09
dd_Smed_v6_7643_0_1	DHDH	Trans-1,2-dihydrobenzene-1,2-diol dehydrogenase	dhdh	Trans-1,2-dihydrobenzene-1,2-diol dehydrogenase	Contig5958	0.298365	7.32135	0.0659164	2.51827	3.14242	1.95e-06	2.21409	3.14242	3.26e-05
dd_Smed_v6_7677_0_1	HEL-S-283	Epididymis secretory protein Li 283	CELE_Y66D12A.9	Uncharacterized protein	Contig1646	-0.0367812	7.08597	0.85364	1.08296	4.07489	0.00168796	1.06228	4.07489	0.00241612
dd_Smed_v6_7699_0_1	NA	NA	NA	NA	Contig762	-0.679982	7.69377	0.0111019	1.6581	3.96825	0.00172715	1.52999	3.96825	0.00467017
dd_Smed_v6_7746_0_1	ANK1	Ankyrin-1	ANK1	Ankyrin-1	PL06012A1H06	0.210423	6.25034	0.175543	1.14321	2.56174	0.0662624	1.84899	2.56174	0.00191553
dd_Smed_v6_7766_0_1	SULT1C4	Sulfotransferase 1C4	sult1st5	Sulfotransferase	Contig4860	0.423389	7.12203	0.0294233	3.63375	4.67196	8.08e-30	3.68314	4.67196	1.8e-30
dd_Smed_v6_777_0_1	NA	NA	NA	NA	Contig2798	2.78822	9.5208	4.21e-05	5.45296	5.65611	4.96e-31	5.86977	5.65611	1.53e-34
dd_Smed_v6_7775_0_1	TBC1D23	TBC1 domain family member 23	CG4552	CG4552	Contig4985	0.316962	6.83156	0.0530596	1.56717	4.74402	6.24e-07	1.11609	4.74402	0.000578633
dd_Smed_v6_7779_0_1	WWP2	NEDD4-like E3 ubiquitin-protein ligase WWP2	Wwp1	NEDD4-like E3 ubiquitin-protein ligase WWP1	PL06021A2C04	0.0243878	6.29178	0.838843	1.22474	4.72284	0.00289878	0.991106	4.72284	0.0213712
dd_Smed_v6_7790_0_1	NA	NA	NA	NA	Contig327	1.32448	8.159	0.000745474	2.71654	4.75207	1.57e-19	2.22257	4.75207	1.08e-13
dd_Smed_v6_7796_0_1	NA	NA	-	Uncharacterized protein	Contig2247	-0.0725934	6.4102	0.830636	1.60298	5.01619	2.97e-07	1.02649	5.01619	0.00163442
dd_Smed_v6_7799_1_1	NA	NA	NA	NA	Contig5546	0.173687	7.97482	0.309605	1.46308	3.85742	0.00513327	1.682	3.85742	0.0012764
dd_Smed_v6_7803_0_1	ABHD12	Monoacylglycerol lipase ABHD12	abhd12	Monoacylglycerol lipase ABHD12	Contig3050	2.12487	8.11258	6.06e-05	3.54697	4.70793	4.05e-34	3.35167	4.70793	5.94e-31
dd_Smed_v6_781_0_1	ARPC5L	Actin-related protein 2/3 complex subunit 5-like protein	arpc5lb	Actin-related protein 2/3 complex subunit 5	Contig6978	1.46489	10.6936	0.000960571	1.58315	5.50774	1.73e-05	1.36011	5.50774	0.000286742
dd_Smed_v6_783_0_1	NA	NA	NA	NA	Contig1681	1.28041	6.956	0.00276302	1.87663	3.6018	0.00666848	1.55626	3.6018	0.0304488
dd_Smed_v6_7833_0_1	PHLDB2	Pleckstrin homology-like domain family B member 2	PHLDB2	Pleckstrin homology-like domain family B member 2	Contig5964	0.335954	7.28976	0.0895447	1.69367	4.09676	5.2e-07	1.62572	4.09676	1.73e-06
dd_Smed_v6_7835_0_1	ELOVL4	Elongation of very long chain fatty acids protein 4	elovl4b	Elongation of very long chain fatty acids protein	PL06023B2D03	-0.0139684	7.1382	0.689893	1.636	3.41367	0.00077488	1.14264	3.41367	0.027035
dd_Smed_v6_784_0_1	ATOX1	Copper transport protein ATOX1	cuc-1	CU (Copper) Chaperonin	Contig142	1.60186	9.33507	0.000432266	2.6092	6.92388	1.6e-18	2.75444	6.92388	2.72e-20
dd_Smed_v6_7847_0_1	SLC46A3	Solute carrier family 46 member 3	SLC46A3	Solute carrier family 46 member 3	Contig2006	1.38736	7.38628	7.5e-05	2.50536	3.75606	9.48e-10	1.85695	3.75606	6.91e-06
dd_Smed_v6_785_0_1	CTSA	Lysosomal protective protein	CTSA	Lysosomal protective protein	Contig613	2.73343	10.4184	2.72e-05	1.40177	9.36864	3.12e-05	1.26234	9.36864	0.000222252
dd_Smed_v6_7852_0_1	CLN8	Protein CLN8	CLN8	Protein CLN8	Contig2332	2.42516	7.65285	0.000114078	5.45346	4.12234	2.32e-39	5.36043	4.12234	2.65e-38
dd_Smed_v6_786_0_1	PNP	Purine nucleoside phosphorylase	Pnp	Purine nucleoside phosphorylase	Contig5010	1.18466	10.2629	0.00037656	2.30059	7.95056	1.92e-16	2.23113	7.95056	1.6e-15
dd_Smed_v6_7861_0_1	ANK3	Ankyrin-3	sowah	Sosondowah, isoform J	Contig5413	0.683286	7.85584	0.00271075	2.18597	4.45569	3.57e-08	2.15559	4.45569	6.32e-08
dd_Smed_v6_787_0_1	PAK4	Serine/threonine-protein kinase PAK 4	mbt	Serine/threonine-protein kinase PAK mbt	Contig6555	0.815624	9.63107	0.0228549	1.84962	5.38754	2.67e-09	1.79004	5.38754	1.01e-08
dd_Smed_v6_7876_0_1	NA	NA	NA	NA	PL04008B1G08	0.128294	6.59772	0.495234	1.39444	3.07323	0.00317715	1.05013	3.07323	0.0359691
dd_Smed_v6_7893_0_1	NA	NA	NA	NA	Contig4210	1.34784	7.32439	0.000714056	2.72172	2.71393	7.86e-06	3.19473	2.71393	2.12e-07
dd_Smed_v6_7894_0_1	NA	NA	NA	NA	Contig1465	1.13136	7.3743	0.000967827	2.27656	4.11331	2.89e-10	2.13958	4.11331	3.6e-09
dd_Smed_v6_79_0_1	SFTPA1	Pulmonary surfactant-associated protein A1	si:dkey-241l7.4	Zgc:171670 protein	Contig1628	-0.304424	10.4	0.191727	5.38576	5.94253	3.99e-19	5.7334	5.94253	7.22e-21
dd_Smed_v6_790_0_1	PRSS12	Neurotrypsin	teq	GRAAL protein	Contig7620	0.201219	6.59056	0.146736	4.99044	9.13542	1.49e-48	4.97606	9.13542	2.75e-48
dd_Smed_v6_7913_0_1	TPK1	Thiamin pyrophosphokinase 1	TPK1	Thiamin pyrophosphokinase 1	Contig2061	0.230858	6.49301	0.361748	2.42687	3.95769	1.34e-09	2.21426	3.95769	3.6e-08
dd_Smed_v6_7935_0_1	NA	NA	NA	NA	PL03018A2H04	0.167605	6.85488	0.429489	2.04579	3.05064	7.55e-06	2.07771	3.05064	6.15e-06
dd_Smed_v6_7943_0_1	PGAP1	GPI inositol-deacylase	PGAP1	GPI inositol-deacylase	PL06013B2E06	-0.108007	6.59621	0.286903	1.3157	3.63479	0.00132495	0.999225	3.63479	0.0207923
dd_Smed_v6_7946_0_1	NLGN4X	Neuroligin-4, X-linked	nlgn4b	Neuroligin 4b	PL04002X1H12	0.324868	7.41806	0.0452134	1.7545	3.43333	0.000712971	1.4219	3.43333	0.00809603
dd_Smed_v6_7964_0_1	ACTN2	Alpha-actinin-2	Actn3	Alpha-actinin-3	Contig3770	0.453978	6.6447	0.0714532	2.85265	3.8441	4e-11	2.75845	3.8441	1.86e-10
dd_Smed_v6_797_0_1	NA	NA	NA	NA	Contig3259	1.27743	10.2058	0.000130299	1.85276	8.71774	1.03e-10	1.55888	8.71774	6.93e-08
dd_Smed_v6_7979_0_1	RAB43	Ras-related protein Rab-43	CELE_K02E10.1	Uncharacterized protein	Contig44	1.81457	7.64612	5.53e-05	5.43175	3.90321	1.77e-40	5.58088	3.90321	2.87e-42
dd_Smed_v6_8_0_1	NA	NA	NA	NA	Contig1137	-0.396439	9.49436	0.17379	5.28464	12.1029	1.48e-28	5.04558	12.1029	1.24e-26
dd_Smed_v6_8006_0_1	NA	NA	zgc:162297	Zgc:162297	Contig6350	-0.194358	6.73573	0.333457	4.07056	4.08883	6.04e-11	3.95741	4.08883	2.05e-10
dd_Smed_v6_8029_0_1	PHYHD1	Phytanoyl-CoA dioxygenase domain-containing protein 1	PHYHD1	Phytanoyl-CoA dioxygenase domain-containing protein 1	Contig5922	1.42591	7.56464	0.0184137	4.41527	3.55555	1.66e-12	4.37091	3.55555	3.04e-12
dd_Smed_v6_8071_0_1	MPC2	Mitochondrial pyruvate carrier 2	mpc2	Mitochondrial pyruvate carrier	Contig4429	1.43555	8.71329	9.45e-05	1.61221	3.61192	0.000850778	1.77796	3.61192	0.00024787
dd_Smed_v6_81_0_1	CTSB	Cathepsin B	Ctsb	Cathepsin B	Contig6244	4.34252	12.9149	0.00104043	3.13538	10.3293	2.93e-18	2.98814	10.3293	8.41e-17
dd_Smed_v6_8118_0_1	COQ3	Ubiquinone biosynthesis O-methyltransferase, mitochondrial	CH211-31O18.2-001	Novel protein	Contig2598	1.23416	7.36627	0.000152027	2.28644	5.27988	2.66e-12	1.90319	5.27988	6.62e-09
dd_Smed_v6_8150_0_1	SLC26A5	Prestin	slc26a5	Solute carrier family 26 (anion exchanger), member 5	Contig4920	0.0442237	6.03995	0.70858	4.64866	4.31304	7.89e-28	4.91614	4.31304	2.4e-30
dd_Smed_v6_8166_0_1	PEX12	Peroxisome assembly protein 12	prx-12	Putative peroxisome assembly protein 12	Contig3641	0.148942	8.11876	0.355997	1.97205	4.8886	1.4e-10	1.84653	4.8886	2.26e-09
dd_Smed_v6_819_0_1	NDUFB2	NADH dehydrogenase [ubiquinone] 1 beta subcomplex subunit 2, mitochondrial	NDUFB2	NADH dehydrogenase [ubiquinone] 1 beta subcomplex subunit 2, mitochondrial	Contig1510	-0.106928	9.03296	0.543058	1.75566	5.23797	0.000100408	1.56124	5.23797	0.000680053
dd_Smed_v6_8190_0_1	LHX9	LIM/homeobox protein Lhx9	lhx2b	LIM homeobox 2	Contig2996	-0.0766021	6.60789	0.327517	4.31505	3.19756	4.12e-15	4.49988	3.19756	4.34e-16
dd_Smed_v6_8244_0_1	SLC2A1	Solute carrier family 2, facilitated glucose transporter member 1	Glut1	Glucose transporter type 1	Contig1158	-0.00966479	7.11179	0.522878	1.64782	3.16876	0.000206249	1.62821	3.16876	0.000282448
dd_Smed_v6_825_0_1	TIMM23	Mitochondrial import inner membrane translocase subunit Tim23	NA	NA	Contig3792	-0.921883	9.6647	0.000531482	1.70953	3.56817	0.0254017	2.166	3.56817	0.00451007
dd_Smed_v6_8252_0_1	LHX1	LIM/homeobox protein Lhx1	LHX1	LIM/homeobox protein Lhx1	Contig4742	1.8281	6.88132	0.00215235	7.18732	4.62379	3.13e-49	7.0674	4.62379	5.52e-48
dd_Smed_v6_8255_0_1	ARAP1	Arf-GAP with Rho-GAP domain, ANK repeat and PH domain-containing protein 1	Arap1	Arf-GAP with Rho-GAP domain, ANK repeat and PH domain-containing protein 1	Contig3820	1.13507	7.15576	0.000530466	1.49529	5.05681	2.55e-07	1.40888	5.05681	1.47e-06
dd_Smed_v6_827_0_1	NA	NA	rpz4	Zgc:113320	Contig5918	-1.17564	9.07187	0.0320996	8.01919	10.1912	2.3e-47	4.48623	10.1912	9.09e-21
dd_Smed_v6_8282_0_1	AFMID	Kynurenine formamidase	Afmid	Kynurenine formamidase	Contig6168	0.446967	7.93673	0.118951	1.35515	3.89852	0.00117238	1.24403	3.89852	0.00358583
dd_Smed_v6_8300_0_1	CDKL3	Cyclin-dependent kinase-like 3	CDKL3	Cyclin-dependent kinase-like 3	PL05006A2G05	2.22571	9.09934	0.000712282	4.70228	5.91701	1.69e-38	4.47214	5.91701	1.45e-35
dd_Smed_v6_8301_0_1	NA	NA	NA	NA	Contig4448	1.31678	7.47955	0.00050119	1.14885	3.38523	0.0123703	1.58282	3.38523	0.000414701
dd_Smed_v6_8303_0_1	NUMB	Protein numb homolog	numb	Protein numb	Contig16	0.0679638	6.33962	0.587556	1.05645	3.82707	0.0107502	1.10262	3.82707	0.00839736
dd_Smed_v6_8310_0_1	FGFRL1	Fibroblast growth factor receptor-like 1	fgfrl1a	FGF receptor-like protein 1a	Contig3977	0.218212	6.57448	0.160273	1.78657	3.79826	1.53e-05	1.25047	3.79826	0.00358554
dd_Smed_v6_8328_0_1	PLA2G15	Group XV phospholipase A2	PLA2G15	Group XV phospholipase A2	Contig603	0.944096	6.61514	0.114202	2.36488	2.89478	1.29e-06	2.7517	2.89478	2.12e-08
dd_Smed_v6_833_0_1	ATP6V0A1	V-type proton ATPase 116 kDa subunit a isoform 1	Vha100-1	V-type proton ATPase subunit a	Contig5624	2.13197	9.70473	0.000382073	2.80689	8.27337	3.31e-23	2.57272	8.27337	6.7e-20
dd_Smed_v6_8331_0_1	NA	NA	NA	NA	PL05001A1F05	1.7966	7.45209	0.000958743	2.54355	3.91181	1.51e-11	2.34793	3.91181	5.14e-10
dd_Smed_v6_8349_0_1	PLA2G6	85/88 kDa calcium-independent phospholipase A2	Pla2g6	85/88 kDa calcium-independent phospholipase A2	Contig3926	0.692924	6.77563	0.00172526	2.23338	4.05735	6.97e-10	1.78955	4.05735	9.68e-07
dd_Smed_v6_835_0_1	SNX2	Sorting nexin-2	Snx2	Sorting nexin-2	Contig4400	1.595	9.22114	8.88e-05	1.79034	6.12963	1.1e-10	1.6516	6.12963	3.26e-09
dd_Smed_v6_8373_0_1	FLVCR2	Feline leukemia virus subgroup C receptor-related protein 2	Mfsd7	Major facilitator superfamily domain-containing protein 7	PL04024A2F05	0.595797	7.04278	0.00589864	6.57018	4.45101	1.26e-38	6.25568	4.45101	7.23e-36
dd_Smed_v6_8378_0_1	BSCL2	Seipin	bscl2	Berardinelli-Seip congenital lipodystrophy 2 (seipin)	Contig1298	0.57842	7.35251	0.00310504	1.77768	2.8652	0.000497978	2.17015	2.8652	2.11e-05
dd_Smed_v6_8379_0_1	NA	NA	NA	NA	Contig5586	2.00788	7.76327	5.14e-05	2.55424	3.45798	2.52e-06	2.31682	3.45798	2.23e-05
dd_Smed_v6_838_0_1	REEP6	Receptor expression-enhancing protein 6	Reep6	Receptor expression-enhancing protein 6	Contig7501	1.37623	10.8147	0.00333909	2.1405	7.73888	1.4e-13	1.89697	7.73888	6.22e-11
dd_Smed_v6_8385_0_1	NA	NA	NA	NA	Contig939	1.26383	7.92413	0.000609252	2.55334	2.82626	2.09e-06	2.85591	2.82626	1.38e-07
dd_Smed_v6_8406_0_1	PCSK1	Neuroendocrine convertase 1	Pcsk1	Neuroendocrine convertase 1	Contig6221	-0.138448	6.52639	0.136038	2.85538	3.52605	2.7e-05	2.07083	3.52605	0.00275852
dd_Smed_v6_8407_0_1	SIDT2	SID1 transmembrane family member 2	Sidt1	SID1 transmembrane family member 1	PL06019B2E12	0.794424	6.62811	0.00741141	1.9391	3.88825	9.77e-06	1.94122	3.88825	1.1e-05
dd_Smed_v6_8422_0_1	FUCA2	Plasma alpha-L-fucosidase	Fuca2	Plasma alpha-L-fucosidase	PL05010A1G12	0.787288	6.75549	0.0305443	3.05078	4.45249	6.09e-13	3.2827	4.45249	1.54e-14
dd_Smed_v6_8448_0_1	CD163	Scavenger receptor cysteine-rich type 1 protein M130	bark	Protein bark beetle	Contig2369	0.61407	7.34254	0.00673969	1.0955	4.59078	0.000997061	0.860745	4.59078	0.0136828
dd_Smed_v6_845_0_1	COX4I2	Cytochrome c oxidase subunit 4 isoform 2, mitochondrial	COX4	Cytochrome c oxidase subunit 4, isoform A	Contig3793	0.275123	10.8996	0.191636	1.01439	8.50852	0.000760367	0.913243	8.50852	0.00312308
dd_Smed_v6_8479_0_1	NA	NA	NA	NA	PL030017B20C10	0.474304	6.26964	0.0182224	5.4929	5.14042	5.85e-40	5.55137	5.14042	1.4e-40
dd_Smed_v6_8505_0_1	PGLYRP1	Peptidoglycan recognition protein 1	PGRP-LE	Peptidoglycan-recognition protein LE	Contig4774	1.51371	8.19236	6.18e-05	2.11131	3.32681	0.00915311	2.91458	3.32681	0.000327446
dd_Smed_v6_8560_0_1	ABCG2	ATP-binding cassette sub-family G member 2	w	Protein white	Contig3459	1.63483	7.99675	7.29e-05	6.17628	4.93724	1.47e-48	6.3913	4.93724	4.69e-51
dd_Smed_v6_859_0_1	CAT	Catalase	CAT	Catalase	Contig269	-0.0284331	9.09364	0.828942	1.97145	7.23074	1.27e-10	2.12873	7.23074	4.7e-12
dd_Smed_v6_8591_0_1	DHCR7	7-dehydrocholesterol reductase	dhcr7	7-dehydrocholesterol reductase	Contig1308	0.727415	6.7821	0.045701	3.9878	4.43856	3.41e-23	3.75403	4.43856	5.79e-21
dd_Smed_v6_862_0_1	NA	NA	NA	NA	Contig1625	2.63747	9.40537	0.000106484	3.92562	6.76787	7.06e-26	3.73002	6.76787	8.47e-24
dd_Smed_v6_864_0_1	ARF1	ADP-ribosylation factor 1	Arf1	ADP-ribosylation factor 1	Contig3270	1.18422	10.4213	0.000238587	1.70486	7.02619	1.96e-06	1.61828	7.02619	7.59e-06
dd_Smed_v6_8642_0_1	RGL1	Ral guanine nucleotide dissociation stimulator-like 1	RGL1	Ral guanine nucleotide dissociation stimulator-like 1	PL06018A1F01	0.206122	6.07373	0.282119	2.61899	3.03622	4.08e-09	2.21055	3.03622	7.91e-07
dd_Smed_v6_8653_0_1	DNM2	Dynamin-2	dnm2a	Dynamin 2	Contig4008	0.715125	7.34549	0.00115046	1.88841	4.06429	8.02e-07	1.39551	4.06429	0.000368313
dd_Smed_v6_867_0_1	RAB11B	Ras-related protein Rab-11B	rab11ba	RAB11B, member RAS oncogene family, a	Contig1193	1.73574	9.92027	8.5e-05	1.6557	7.29255	1.13e-09	1.54545	7.29255	1.64e-08
dd_Smed_v6_869_0_1	TYMP	Thymidine phosphorylase	TYMP	Thymidine phosphorylase	Contig6510	0.551588	8.47032	0.0812633	1.42537	6.4812	0.000125678	1.07901	6.4812	0.00529667
dd_Smed_v6_87_0_1	NA	NA	CG10527	Uncharacterized protein	Contig239	3.73983	12.2126	2.64e-05	3.73357	10.9895	7.87e-30	3.61254	10.9895	3.15e-28
dd_Smed_v6_870_0_1	FKBP15	FK506-binding protein 15	FKBP15	FK506-binding protein 15	Contig5392	0.556743	6.32339	0.0284209	1.71453	8.49882	1.22e-07	1.71338	8.49882	1.45e-07
dd_Smed_v6_8719_0_1	NA	NA	NA	NA	Contig4004	1.25636	7.06836	0.000435664	3.12457	4.01852	1.57e-13	3.15832	4.01852	1.03e-13
dd_Smed_v6_8735_0_1	TBCK	TBC domain-containing protein kinase-like protein	TBCK	TBC domain-containing protein kinase-like protein	Contig4786	0.820086	8.17957	0.00101075	0.986593	5.26997	0.00198933	1.00923	5.26997	0.00174263
dd_Smed_v6_8746_0_1	CELA1	Chymotrypsin-like elastase family member 1	zgc:112302	Zgc:112302	Contig3685	0.991733	7.25033	0.0127698	6.7454	4.99967	1.24e-62	6.50639	4.99967	3.1e-59
dd_Smed_v6_8766_0_1	ACMSD	2-amino-3-carboxymuconate-6-semialdehyde decarboxylase	Acmsd	2-amino-3-carboxymuconate-6-semialdehyde decarboxylase	Contig3102	0.575236	7.01782	0.0110564	5.86497	3.89204	2.38e-23	5.76667	3.89204	1e-22
dd_Smed_v6_8767_0_1	GRHPR	Glyoxylate reductase/hydroxypyruvate reductase	grhpra	Glyoxylate reductase/hydroxypyruvate reductase a	PL05003A1H06	-0.0391324	6.79431	0.796063	1.16484	3.38198	0.00175492	0.848347	3.38198	0.0324803
dd_Smed_v6_8771_0_1	HPS4	Hermansky-Pudlak syndrome 4 protein	HPS4	Hermansky-Pudlak syndrome 4 protein	PL06017B1C04	-0.0227365	6.03791	0.842488	1.81044	2.44415	0.00508009	1.2603	2.44415	0.0687609
dd_Smed_v6_878_0_1	RTN4	Reticulon-4	rtn1a	Reticulon	Contig20	1.86018	8.81138	0.000162171	2.08492	7.27794	3.63e-11	1.99022	7.27794	3.09e-10
dd_Smed_v6_8783_0_1	NA	NA	NA	NA	Contig761	1.94161	6.58807	0.000167385	1.4101	2.85693	0.00929587	1.37655	2.85693	0.0128404
dd_Smed_v6_8821_0_1	NA	NA	NA	NA	Contig6238	0.417182	7.7523	0.229653	1.0719	4.72511	0.000973072	0.821956	4.72511	0.0163577
dd_Smed_v6_885_0_1	GYG2	Glycogenin-2	gyg-1	Glycogenin-1	PL05003A2D11	0.160541	8.85213	0.626161	2.0266	7.08547	2.52e-13	1.85035	7.08547	2.73e-11
dd_Smed_v6_8853_0_1	NA	NA	NA	NA	Contig4254	1.85641	7.40338	0.000170051	6.1448	5.395	1.48e-63	6.18921	5.395	5.78e-64
dd_Smed_v6_8868_0_1	MON1A	Vacuolar fusion protein MON1 homolog A	mon1bb	MON1 secretory-trafficking family member Bb	Contig5636	0.775665	7.09714	0.00070311	1.531	2.84251	0.00424531	1.41933	2.84251	0.00969115
dd_Smed_v6_888_0_1	NA	NA	CG8997	CG8997 protein	Contig5894	-0.720202	9.33204	0.0264325	4.9945	4.91257	3.12e-24	5.35649	4.91257	6.83e-27
dd_Smed_v6_8882_0_1	NA	NA	NA	NA	Contig1818	1.4612	7.59574	0.000518824	3.78386	3.49998	1.5e-15	3.35775	3.49998	9.51e-13
dd_Smed_v6_8886_0_1	ELF3	ETS-related transcription factor Elf-3	elf3	E74-like factor 3 (ets domain transcription factor, epithelial-specific )	Contig4890	0.666711	6.85306	0.00453161	1.66577	2.95152	0.00380727	2.48199	2.95152	1.32e-05
dd_Smed_v6_896_0_1	GLUL	Glutamine synthetase	Gs2	Glutamine synthetase 2 cytoplasmic	Contig3804	2.12253	11.4997	0.000140314	1.49064	6.88755	3.58e-07	1.45252	6.88755	8.49e-07
dd_Smed_v6_8996_0_1	DYNC1H1	Cytoplasmic dynein 1 heavy chain 1	Dhc64C	Dynein heavy chain, cytoplasmic	Contig2842	1.48373	7.82145	0.000100984	2.67012	5.97407	2.47e-19	2.67497	5.97407	2.38e-19
dd_Smed_v6_9016_0_1	ENPP4	Bis(5'-adenosyl)-triphosphatase ENPP4	Enpp5	Ectonucleotide pyrophosphatase/phosphodiesterase family member 5	Contig1794	-0.225087	6.68333	0.133546	0.962376	4.44886	0.00685526	1.14375	4.44886	0.00118083
dd_Smed_v6_9028_0_1	KCNK1	Potassium channel subfamily K member 1	kcnk6	Potassium channel, subfamily K, member 6	Contig2970	1.2003	7.09863	0.000353556	2.04343	3.85809	1.88e-09	1.59807	3.85809	3.54e-06
dd_Smed_v6_9051_0_1	SLC16A9	Monocarboxylate transporter 9	CG8389	CG8389, isoform A	Contig3367	0.978951	6.94911	0.00200371	3.21513	4.14645	2.67e-16	3.60462	4.14645	1.12e-19
dd_Smed_v6_907_0_1	MAT2A	S-adenosylmethionine synthase isoform type-2	Mat2a	S-adenosylmethionine synthase isoform type-2	Contig5554	0.898233	10.4472	0.00229143	3.96432	7.46582	3.81e-29	4.12981	7.46582	4.77e-31
dd_Smed_v6_9076_0_1	NA	NA	Lgsn	Lengsin	PL06022A2E11	-0.266441	6.98525	0.0596872	2.44636	3.82507	3.28e-11	2.76734	3.82507	8.67e-14
dd_Smed_v6_9112_0_1	NA	NA	NA	NA	Contig2328	0.757505	6.70594	0.149264	5.37825	2.56804	1.96e-10	5.45964	2.56804	1.37e-10
dd_Smed_v6_912_0_1	VPS26B	Vacuolar protein sorting-associated protein 26B	Vps26b	Vacuolar protein sorting-associated protein 26B	Contig3508	1.85858	8.78526	3.8e-05	2.30642	6.14072	3.63e-13	1.92709	6.14072	1.38e-09
dd_Smed_v6_913_0_1	RAC1	Ras-related C3 botulinum toxin substrate 1	Rac1	Ras-related C3 botulinum toxin substrate 1	Contig485	2.22896	9.07467	8.92e-05	3.25705	6.86166	1.37e-22	3.04344	6.86166	4.19e-20
dd_Smed_v6_9133_0_1	SESN1	Sestrin-1	sesn1	Sestrin 1	Contig6840	0.450975	7.5542	0.0828293	1.40655	3.8986	0.000192839	0.758361	3.8986	0.0701571
dd_Smed_v6_9144_0_1	TPCN2	Two pore calcium channel protein 2	Tpcn2	Two pore calcium channel protein 2	Contig4557	0.975247	7.38017	0.000491617	3.2191	2.94317	1.88e-06	3.3307	2.94317	1e-06
dd_Smed_v6_9146_0_1	XIAP	E3 ubiquitin-protein ligase XIAP	XIAP	E3 ubiquitin-protein ligase XIAP	Contig2887	0.812506	6.86652	0.201315	4.51243	2.17261	9.17e-08	3.64676	2.17261	1.19e-05
dd_Smed_v6_9150_0_1	RAB5B	Ras-related protein Rab-5B	rab-6.2	Ras-related protein Rab-6.2	Contig6797	1.29004	7.40852	0.00218683	6.30066	3.36453	4.75e-30	5.78392	3.36453	2.82e-26
dd_Smed_v6_9160_0_1	DNASE2B	Deoxyribonuclease-2-beta	crn-7	Cell-death-related nuclease 7	Contig1937	0.203752	6.48418	0.136333	3.45974	3.40381	2.83e-08	3.41889	3.40381	4.67e-08
dd_Smed_v6_9208_0_1	ABCC2	Canalicular multispecific organic anion transporter 1	Abcc3	Canalicular multispecific organic anion transporter 2	Contig2314	0.535532	6.27213	0.0191231	2.15017	3.77189	3.69e-07	1.58721	3.77189	0.000230398
dd_Smed_v6_9232_0_1	MGAT2	Alpha-1,6-mannosyl-glycoprotein 2-beta-N-acetylglucosaminyltransferase	Mgat2	Alpha-1,6-mannosyl-glycoprotein beta-1,2-N-acetylglucosaminyltransferase	Contig4888	0.488181	7.49619	0.0214987	1.59354	4.64172	2.14e-07	1.14465	4.64172	0.00029059
dd_Smed_v6_926_1_1	NA	NA	NA	NA	Contig5443	1.28424	9.95141	0.00032566	1.42138	6.65568	4.01e-05	1.36727	6.65568	9.31e-05
dd_Smed_v6_927_1_1	FLOT2	Flotillin-2	Flo2	Flotillin-2	Contig5209	0.388593	7.61309	0.0453838	1.00508	6.431	0.00081527	0.887999	6.431	0.0040404
dd_Smed_v6_9275_0_1	MFN1	Mitofusin-1	Marf	Transmembrane GTPase Marf	Contig6506	0.319414	7.22385	0.178322	3.28302	3.98948	6.82e-19	2.97643	3.98948	5.95e-16
dd_Smed_v6_9277_0_1	-	Dct1	-	Dct1	Contig5646	0.374611	7.83278	0.0161202	2.02167	4.82368	3.84e-09	1.71841	4.82368	6.94e-07
dd_Smed_v6_929_0_1	AVIL	Advillin	Gel	Gelsolin	Contig4707	0.867501	8.68141	0.0300244	1.62283	8.17093	5.76e-08	1.49935	8.17093	6.65e-07
dd_Smed_v6_9317_0_1	RNF31	E3 ubiquitin-protein ligase RNF31	LUBEL	Uncharacterized protein, isoform I	Contig4776	0.769668	6.39844	0.0121112	4.17925	4.24988	4.95e-12	4.46264	4.24988	3.26e-13
dd_Smed_v6_9329_0_1	LIMK1	LIM domain kinase 1	Limk1	LIM domain kinase 1	Contig4627	1.23266	7.04315	0.000150064	2.71896	3.32219	1.24e-08	2.66113	3.32219	2.88e-08
dd_Smed_v6_933_0_1	NA	NA	Lsd-1	Lipid storage droplets surface-binding protein 1	Contig172	-0.214245	8.95199	0.457336	1.75707	5.28217	1.05e-07	1.94202	5.28217	4.49e-09
dd_Smed_v6_934_0_1	RER1	RER1 retention in endoplasmic reticulum 1 homolog (S. cerevisiae), isoform CRA_a	rer1	RER1 homolog	PL03019A2G03	0.950382	9.43992	0.0109433	2.33579	6.23412	7.82e-14	2.04339	6.23412	6.56e-11
dd_Smed_v6_9355_0_1	GRAMD1B	GRAM domain-containing protein 1B	GRAMD1B	GRAM domain-containing protein 1B	PL06021A2B06	-0.135111	5.88656	0.366101	1.14978	3.9084	0.00111399	0.724278	3.9084	0.0603987
dd_Smed_v6_9357_0_1	ABCC1	Multidrug resistance-associated protein 1	Abcc1	Multidrug resistance-associated protein 1	Contig3426	1.65478	7.57834	5.66e-05	3.83218	4.49415	3.37e-25	3.83571	4.49415	3.27e-25
dd_Smed_v6_9371_0_1	NA	NA	NA	NA	Contig5305	0.699398	6.60369	0.103369	2.12269	5.05825	1.76e-16	2.12721	5.05825	1.68e-16
dd_Smed_v6_9401_0_1	SLC23A2	Solute carrier family 23 member 2	Slc23a4	Solute carrier family 23 member 4	Contig949	0.229818	6.13054	0.0939829	3.94391	3.3681	1.54e-16	3.10838	3.3681	3.74e-11
dd_Smed_v6_945_0_1	NA	NA	NA	NA	PL05004B2C08	1.6886	8.8024	0.00607449	1.66559	7.57464	2.24e-09	1.71973	7.57464	7.87e-10
dd_Smed_v6_9472_0_1	NA	NA	NA	NA	Contig3696	0.962551	6.60082	0.0185994	4.45937	1.84858	1.2e-05	4.33738	1.84858	2.23e-05
dd_Smed_v6_9513_0_1	SLC47A1	Multidrug and toxin extrusion protein 1	Slc47a1	Multidrug and toxin extrusion protein 1	PL06023A1A07	0.469829	6.41788	0.00899291	5.59787	4.11342	2.02e-25	5.43665	4.11342	2.73e-24
dd_Smed_v6_9518_0_1	RAB7A	Ras-related protein Rab-7a	Rab7	CG5915 protein	Contig1183	0.36358	6.00363	0.212727	2.44367	2.41549	6.64e-05	2.60278	2.41549	2.45e-05
dd_Smed_v6_9523_0_1	USP8	Ubiquitin carboxyl-terminal hydrolase 8	Usp2	SD04280p	Contig7204	1.09113	7.17051	0.00267067	2.60226	2.1844	0.00134294	3.42136	2.1844	3.2e-05
dd_Smed_v6_958_0_1	EML1	Echinoderm microtubule-associated protein-like 1	EML1	Echinoderm microtubule-associated protein-like 1	Contig4225	-0.124098	6.68562	0.544312	1.01487	7.92498	0.000348228	0.565528	7.92498	0.0731598
dd_Smed_v6_959_0_1	ATP6V1A	V-type proton ATPase catalytic subunit A	Vha68-2	V-type proton ATPase catalytic subunit A isoform 2	PL06011B1G03	1.14196	8.17761	0.00739798	2.10311	6.83376	3.77e-14	2.02696	6.83376	3.36e-13
dd_Smed_v6_960_0_1	TXNRD3	Thioredoxin reductase 3	txnrd1	Thioredoxin reductase 1	Contig1040	0.736703	7.97551	0.0126262	1.12048	6.76219	0.000856263	1.07887	6.76219	0.00159697
dd_Smed_v6_962_0_1	YME1L1	ATP-dependent zinc metalloprotease YME1L1	YME1L	CG3499, isoform C	Contig3801	-0.23197	7.69327	0.350488	0.927486	5.33537	0.0269407	1.14316	5.33537	0.00585118
dd_Smed_v6_9669_0_1	PRKACB	cAMP-dependent protein kinase catalytic subunit beta	PRKACB	cAMP-dependent protein kinase catalytic subunit beta	Contig3929	1.34916	7.2039	0.000642536	10.2075	1.8031	1.17e-18	9.84487	1.8031	1.84e-17
dd_Smed_v6_9678_0_1	NA	NA	NA	NA	Contig1861	0.556291	6.25484	0.17041	4.89772	3.57937	2.22e-26	4.83659	3.57937	7.96e-26
dd_Smed_v6_973_0_1	ENPP4	Bis(5'-adenosyl)-triphosphatase ENPP4	ENPP4	Bis(5'-adenosyl)-triphosphatase ENPP4	Contig5060	2.89041	10.7353	2.61e-05	1.78899	5.75357	9.01e-08	1.58989	5.75357	2.52e-06
dd_Smed_v6_9736_0_1	SLC24A5	Sodium/potassium/calcium exchanger 5	Slc24a2	Solute carrier family 24 (sodium/potassium/calcium exchanger), member 2	Contig4163	-0.307138	6.48074	0.0984626	3.71847	4.16401	9.81e-17	4.25777	4.16401	9.32e-21
dd_Smed_v6_974_0_1	TRAF4	TNF receptor-associated factor 4	Traf4	TNF receptor-associated factor 4	Contig4200	2.22278	9.00773	7.82e-05	2.22497	6.80433	7.34e-14	2.11536	6.80433	1.25e-12
dd_Smed_v6_975_0_1	KLK13	Kallikrein-13	KLK13	Kallikrein-13	Contig6334	-1.22264	8.18798	0.00200658	7.49596	8.36136	2.61e-55	5.35342	8.36136	1.86e-34
dd_Smed_v6_978_0_1	ARPC1A	Actin-related protein 2/3 complex subunit 1A	Arpc1a	Actin-related protein 2/3 complex subunit 1A	Contig3501	1.34058	10.3365	7.6e-05	1.17311	8.98103	0.000119006	1.0297	8.98103	0.000961674
dd_Smed_v6_9785_0_1	SDR16C5	Epidermal retinol dehydrogenase 2	sdr16c5a	Short chain dehydrogenase/reductase family 16C, member 5a	Contig304	0.420327	7.5081	0.01737	2.21844	2.55209	0.000187679	2.39643	2.55209	6.16e-05
dd_Smed_v6_9789_0_1	B3GALT5	Beta-1,3-galactosyltransferase 5	B3GALT5	Beta-1,3-galactosyltransferase 5	Contig2097	0.873355	7.79627	0.00270842	2.23122	3.20518	1.03e-06	2.0755	3.20518	6.41e-06
dd_Smed_v6_9793_0_1	NA	NA	NA	NA	Contig2138	0.649873	7.35334	0.00524457	2.44426	3.9352	1.84e-07	2.2357	3.9352	2.12e-06
dd_Smed_v6_983_0_1	NA	NA	mpeg1.1	Macrophage-expressed 1, tandem duplicate 1	Contig3004	0.00842858	7.54845	0.131633	2.21533	7.25655	8.15e-12	2.06306	7.25655	2.2e-10
dd_Smed_v6_9846_0_1	SLC8B1	Sodium/potassium/calcium exchanger 6, mitochondrial	SLC8B1	Sodium/potassium/calcium exchanger 6, mitochondrial	Contig1756	0.569624	7.69226	0.39512	3.22782	3.64517	2.24e-13	3.13044	3.64517	1.18e-12
dd_Smed_v6_9866_0_1	GGACT	Gamma-glutamylaminecyclotransferase	CG2811	Putative gamma-glutamylcyclotransferase CG2811	Contig7458	2.59183	8.33863	0.00113425	5.46972	1.60416	2.2e-06	5.18469	1.60416	7.03e-06
dd_Smed_v6_993_0_1	NA	NA	NA	NA	Contig160	0.097328	9.40089	0.620289	2.0654	4.88505	0.000826956	2.47262	4.88505	6.99e-05
dd_Smed_v6_9932_0_1	LIPE	Hormone-sensitive lipase	Hsl	Hormone-sensitive lipase ortholog, isoform A	PL06022A2F09	0.18152	5.91234	0.408178	2.21444	3.13304	3.33e-06	2.10223	3.13304	1.17e-05
dd_Smed_v6_994_0_1	PANK2	Pantothenate kinase 2, mitochondrial	Pank3	Pantothenate kinase 3	Contig3785	1.71671	8.1132	0.00109325	4.25673	9.05269	3.99e-40	4.13577	9.05269	2.63e-38

## Sheet: F2SD1-B. Phagocytes_900_high
geneID	uniprot_id_human	uniprot_desc_human	uniprot_id_all5best	uniprot_desc_all5best	gut_mean_tpm	EST_ID	phagocyte_log2FC	phagocyte_avgExpr	phagocyte_FDR	logFC_medial	logCPM_medial	FDR_medial	logFC_lateral	logCPM_lateral	FDR_lateral
dd_Smed_v6_1_0_1	NA	NA	NA	NA	296437	Contig4465	4.83036	14.3184	2.29e-05	6.49054	16.7728	3.05e-33	6.35771	16.7728	2.96e-32
dd_Smed_v6_100_0_1	NA	NA	NA	NA	584.224	Contig60	4.0523	11.8123	3.32e-05	6.84412	8.57273	3.34e-40	7.16661	8.57273	9.34e-43
dd_Smed_v6_10002_0_1	GNPTG	N-acetylglucosamine-1-phosphotransferase subunit gamma	Gnptg	N-acetylglucosamine-1-phosphotransferase subunit gamma	3.2085	Contig1198	1.33243	7.72052	0.000156056	3.03691	1.46492	0.000308495	3.42874	1.46492	5.73e-05
dd_Smed_v6_1002_0_1	SORD	Sorbitol dehydrogenase	Sord	Sorbitol dehydrogenase	171.435	Contig3716	0.389085	9.23378	0.00909352	2.67655	7.89183	4.02e-21	2.58944	7.89183	6.82e-20
dd_Smed_v6_10025_0_1	NA	NA	NA	NA	25.3127	Contig6864	1.03401	6.85262	0.00379773	3.36614	3.88147	6.18e-19	3.40522	3.88147	2.84e-19
dd_Smed_v6_10043_0_1	NA	NA	NA	NA	32.8751	Contig1558	0.795813	6.51008	0.00530423	6.05319	4.42858	1.29e-25	6.11517	4.42858	5.88e-26
dd_Smed_v6_10059_0_1	NA	NA	NA	NA	12.1871	Contig3003	0.516411	6.81272	0.0338611	3.70599	3.43055	4.64e-20	3.39425	3.43055	2.83e-17
dd_Smed_v6_1008_0_1	RNASET2	Ribonuclease T2	rnaset2	Ribonuclease T2	191.775	Contig758	4.26327	11.7994	2.29e-05	5.88872	7.43381	8.87e-46	5.55056	7.43381	5.81e-42
dd_Smed_v6_1009_0_1	LIN7B	Protein lin-7 homolog B	Lin7b	Protein lin-7 homolog B	221.131	Contig5190	0.824981	9.21782	0.00122862	1.04968	7.46663	0.000244935	0.867773	7.46663	0.00337201
dd_Smed_v6_1009_1_1	SLC8B1	Sodium/potassium/calcium exchanger 6, mitochondrial	Slc8b1	Sodium/potassium/calcium exchanger 6, mitochondrial	36.0482	PL05007B1C09	2.08704	8.16411	0.000799309	3.40152	5.36096	2.3e-33	3.29658	5.36096	1.33e-31
dd_Smed_v6_10160_0_1	SLC39A1	Zinc transporter ZIP1	SLC39A1	Zinc transporter ZIP1	13.6302	Contig2670	2.29772	8.1621	3.4e-05	10.9602	3.87037	2.73e-62	10.5503	3.87037	6.67e-58
dd_Smed_v6_1022_0_1	NA	NA	NA	NA	541.433	Contig6766	3.28115	11.1433	0.000845777	6.99577	8.48647	1.19e-62	6.71158	8.48647	4.39e-59
dd_Smed_v6_1029_1_1	NA	NA	NA	NA	137.884	Contig6700	3.44383	9.19239	0.00064886	5.87052	8.19521	2.88e-56	5.80343	8.19521	2.79e-55
dd_Smed_v6_10356_0_1	NA	NA	NA	NA	8.99379	Contig2151	1.59492	7.75597	0.00164821	2.43281	3.92746	1.39e-08	1.89375	3.92746	1.19e-05
dd_Smed_v6_10359_0_1	NA	NA	NA	NA	11.7887	Contig1076	0.930377	7.01859	0.00295655	3.58527	4.04682	1.83e-23	3.92093	4.04682	3.07e-27
dd_Smed_v6_1037_0_1	RAB32	Ras-related protein Rab-32	Rab32	Ras-related protein Rab-32	122.777	Contig5808	2.48048	10.2417	3.27e-05	2.64599	7.00811	2.2e-20	2.4488	7.00811	9.3e-18
dd_Smed_v6_1048_0_1	SLC37A2	Glucose-6-phosphate exchanger SLC37A2	slc37a2	Glucose-6-phosphate exchanger SLC37A2	21.5901	Contig1560	0.767019	7.72962	0.00252561	1.69898	5.40334	3.93e-09	1.3481	5.40334	4.23e-06
dd_Smed_v6_1050_0_1	RAC2	Ras-related C3 botulinum toxin substrate 2	Rac1	Ras-related protein Rac1	78.4564	Contig5264	0.730085	7.86825	0.0174341	1.238	6.63087	1.22e-05	0.945424	6.63087	0.0012164
dd_Smed_v6_1053_0_1	NA	NA	CG1637	Purple acid phosphatase	63.7026	Contig1731	2.11179	8.64176	0.000204553	2.55581	6.56911	2.75e-20	1.98223	6.56911	6.34e-13
dd_Smed_v6_1065_0_1	CLINT1	Clathrin interactor 1	clint1a	Clathrin interactor 1	16.7828	Contig5397	0.500896	8.76983	0.00534265	1.59019	5.20335	1.16e-06	1.63203	5.20335	6.83e-07
dd_Smed_v6_10656_0_1	SLC16A9	Monocarboxylate transporter 9	slc16a9a	Solute carrier family 16, member 9a	18.0769	Contig2353	1.85825	7.61356	0.000143555	3.97235	4.52991	8.38e-23	3.80588	4.52991	3.27e-21
dd_Smed_v6_1067_0_1	ATP6AP2	Renin receptor	atp6ap2	ATPase, H+-transporting, lysosomal accessory protein 2	153.811	Contig6838	2.22917	9.36782	0.000749314	2.53239	6.33974	8.83e-19	2.21787	6.33974	7.71e-15
dd_Smed_v6_1068_0_1	NA	NA	NA	NA	725.164	Contig6709	2.27694	9.41739	0.000923161	6.01543	8.76091	2.68e-49	6.25271	8.76091	5.26e-52
dd_Smed_v6_10699_0_1	PEX3	Peroxisomal biogenesis factor 3	PEX3	Peroxisomal biogenesis factor 3	15.4313	Contig3365	0.290391	6.95856	0.0468835	1.28365	4.36783	9.86e-05	0.707059	4.36783	0.0517814
dd_Smed_v6_10758_0_1	WDR41	WD repeat-containing protein 41	WDR41	WD repeat-containing protein 41	6.84315	PL06013A1B06	0.775963	7.00935	0.0250546	4.17771	3.19896	4.86e-10	4.47079	3.19896	4.81e-11
dd_Smed_v6_1079_0_1	TMEM55A	Type 2 phosphatidylinositol 4,5-bisphosphate 4-phosphatase	Dmel\CG6707	CG6707, isoform B	73.2707	Contig1068	2.08828	9.93372	0.000486662	2.10158	6.10495	1.22e-07	1.99546	6.10495	5.99e-07
dd_Smed_v6_10910_0_1	NA	NA	NA	NA	11.2509	Contig7029	1.82294	7.76277	0.000854245	6.99224	4.20544	7.5e-26	6.84099	4.20544	5.09e-25
dd_Smed_v6_10915_0_1	NA	NA	NA	NA	9.33253	Contig2562	0.70817	6.15987	0.00675023	4.25062	3.81098	8.92e-15	4.17832	3.81098	2.51e-14
dd_Smed_v6_10923_0_1	NA	NA	NA	NA	11.3224	Contig3199	0.549921	6.60506	0.0101627	6.16048	3.30536	6.07e-14	5.92916	3.30536	3.79e-13
dd_Smed_v6_11_0_1	NA	NA	CG10527	LD46156p	4419.33	Contig1963	2.84316	12.3652	2.7e-05	3.62688	11.696	9.77e-22	3.52801	11.696	1e-20
dd_Smed_v6_11031_0_1	NA	NA	NA	NA	1.97065	Contig5461	1.0542	7.52556	0.00185518	8.02419	-0.187425	9.44e-06	7.9028	-0.187425	1.4e-05
dd_Smed_v6_11047_0_1	NA	NA	NA	NA	3.16123	PL06016B1E11	0.589594	6.56501	0.0064788	4.43331	2.49642	8.16e-08	4.66088	2.49642	2.44e-08
dd_Smed_v6_1107_0_1	UBA1	Ubiquitin-like modifier-activating enzyme 1	UBA1	Ubiquitin-like modifier-activating enzyme 1	39.5823	Contig931	0.99153	8.54574	0.000164273	1.30617	7.11796	1.25e-05	1.07065	7.11796	0.000470233
dd_Smed_v6_1109_0_1	KY	Kyphoscoliosis peptidase	Hil	Hillarin	11.8759	Contig6471	0.664933	8.95336	0.00731751	1.38094	5.39692	0.00018376	1.37292	5.39692	0.000232457
dd_Smed_v6_11109_0_1	NA	NA	NA	NA	1.72647	PL030004A10D12	1.30385	7.92781	0.000888513	6.13426	0.532382	1.95e-05	6.21524	0.532382	1.81e-05
dd_Smed_v6_1120_0_1	NA	NA	unc-9	Innexin unc-9	198.8	Contig763	2.62248	10.567	5.92e-05	6.38741	8.14804	6.12e-69	6.15747	8.14804	2.01e-65
dd_Smed_v6_1123_0_1	DPP7	Dipeptidyl peptidase 2	dpp7	Dipeptidyl-peptidase 7	83.2048	Contig5265	2.35946	9.12193	0.000299452	3.1765	7.06298	8.49e-26	3.05997	7.06298	3.49e-24
dd_Smed_v6_1124_0_1	NA	NA	NA	NA	139.584	Contig319	1.16257	9.45672	0.000371787	1.45365	6.61961	8.6e-05	1.29864	6.61961	0.000573056
dd_Smed_v6_11251_0_1	DHDH	Trans-1,2-dihydrobenzene-1,2-diol dehydrogenase	dhdh	Trans-1,2-dihydrobenzene-1,2-diol dehydrogenase	10.0776	Contig4234	1.09137	7.46134	0.00068954	4.54402	3.44905	1.92e-19	3.96268	3.44905	1.4e-15
dd_Smed_v6_1130_0_1	SERINC3	Serine incorporator 3	serinc1	Serine incorporator 1	43.3595	Contig4476	0.435717	8.12036	0.0224521	1.08542	6.34727	0.00255958	0.584741	6.34727	0.15242
dd_Smed_v6_1133_0_1	ATG12	Ubiquitin-like protein ATG12	ATG12	Ubiquitin-like protein ATG12	105.797	Contig3614	1.08248	8.88386	0.000772869	1.41511	5.42831	1.09e-07	1.26924	5.42831	2.45e-06
dd_Smed_v6_11404_0_1	BNIP1	Vesicle transport protein SEC20	bnip1a	BCL2/adenovirus E1B-interacting protein 1a	8.37392	Contig2452	0.549217	6.56217	0.00297962	0.559013	3.13349	0.288306	1.23767	3.13349	0.00857506
dd_Smed_v6_11420_0_1	NA	NA	Naam	LD05707p	4.15472	Contig7091	1.48116	7.12949	0.00138644	4.93539	2.35316	7.7e-12	4.71682	2.35316	5.56e-11
dd_Smed_v6_1144_0_1	TNXB	Tenascin-X	Tnxb	Tenascin X	349.663	Contig6089	0.928018	10.1309	0.00324298	5.0464	9.21049	2.39e-55	4.98509	9.21049	2.8e-54
dd_Smed_v6_11479_0_1	NA	NA	NA	NA	8.02827	Contig3349	0.689956	6.78462	0.0012502	1.06988	4.24991	0.00158014	1.19278	4.24991	0.000422513
dd_Smed_v6_1156_0_1	VMP1	Vacuole membrane protein 1	vmp1	Vacuole membrane protein 1	34.9822	Contig6172	0.838587	10.0062	0.00721924	1.49397	5.63603	1.82e-06	1.32817	5.63603	2.81e-05
dd_Smed_v6_1158_0_1	CHMP5	Charged multivesicular body protein 5	Chmp5	Charged multivesicular body protein 5	229.208	Contig3148	1.66171	9.27981	0.000218059	1.36605	8.02637	8.95e-07	1.14285	8.02637	5.41e-05
dd_Smed_v6_1162_0_1	NA	NA	NA	NA	65.095	Contig3344	1.51762	8.20287	0.00096844	1.86626	4.96776	1.13e-06	1.73467	4.96776	7.26e-06
dd_Smed_v6_1163_0_1	TRAF6	TNF receptor-associated factor 6	TRAF6	TNF receptor-associated factor 6	156.946	Contig5533	3.02547	9.79346	4.33e-05	1.9301	7.89997	7.72e-11	2.00106	7.89997	1.84e-11
dd_Smed_v6_1165_0_1	CAPZB	F-actin-capping protein subunit beta	cpb	F-actin-capping protein subunit beta	149.313	Contig1530	1.70079	9.42893	5e-05	1.31798	7.55216	4.56e-06	1.21417	7.55216	2.99e-05
dd_Smed_v6_1167_0_1	CASP7	Caspase-7	casp3b	Caspase 3, apoptosis-related cysteine peptidase b	173.402	Contig2992	1.47514	10.1189	4.04e-05	2.20701	7.37583	2.81e-12	1.94326	7.37583	8.76e-10
dd_Smed_v6_1171_0_1	SLC13A3	Solute carrier family 13 member 3	slc13a5a	Sodium-dependent citrate transporter	86.4833	Contig7480	2.83985	8.6752	0.000625045	6.71202	7.19283	2.59e-67	6.6005	7.19283	1.72e-65
dd_Smed_v6_11741_0_1	B3GALNT1	UDP-GalNAc:beta-1,3-N-acetylgalactosaminyltransferase 1	B3GALNT1	UDP-GalNAc:beta-1,3-N-acetylgalactosaminyltransferase 1	4.57658	Contig2368	0.520376	6.78142	0.0136855	3.95166	2.51193	8.25e-06	4.08881	2.51193	4.96e-06
dd_Smed_v6_11807_0_1	SLC6A19	Sodium-dependent neutral amino acid transporter B(0)AT1	SerT	Sodium-dependent serotonin transporter	3.27819	Contig92	1.9174	7.26409	0.00010083	5.54348	2.49242	3.15e-12	5.26935	2.49242	2.8e-11
dd_Smed_v6_11818_0_1	SLC15A4	Solute carrier family 15 member 4	SLC15A4	Solute carrier family 15 member 4	11.2554	PL05017B1B03	0.592897	6.40355	0.0115357	2.04827	4.48799	1.66e-07	2.13421	4.48799	5.65e-08
dd_Smed_v6_11845_0_1	NA	NA	NA	NA	17.214	Contig7303	1.86231	8.29877	0.0110221	7.12928	3.64012	1.6e-41	6.81706	3.64012	1.07e-38
dd_Smed_v6_11859_0_1	NA	NA	NA	NA	7.45748	PL06023B1A06	0.481568	7.03155	0.0411797	3.59614	1.61713	0.000421589	3.48321	1.61713	0.000716429
dd_Smed_v6_12018_0_1	SEMA4A	Semaphorin-4A	smp-1	Semaphorin-1A	2.1972	Contig5140	1.13033	6.82573	0.000832641	4.59647	2.25157	6.29e-07	4.50137	2.25157	1.17e-06
dd_Smed_v6_1212_0_1	MAP3K3	Mitogen-activated protein kinase kinase kinase 3	map3k3	Mitogen-activated protein kinase kinase kinase 3	27.1054	Contig764	1.52631	9.06384	0.000125859	2.18919	5.55119	4.27e-08	2.05279	5.55119	3.25e-07
dd_Smed_v6_1216_0_1	NA	NA	NA	NA	44.0294	Contig474	1.39073	8.77115	0.0001838	1.03001	6.55861	0.000213636	0.967618	6.55861	0.00062484
dd_Smed_v6_12262_0_1	NOG	Noggin	Nog	Noggin	26.1577	Contig1936	1.59799	7.60282	6.11e-05	6.19462	4.29128	2.45e-49	6.07525	4.29128	7.35e-48
dd_Smed_v6_1233_0_1	MAST4	Microtubule-associated serine/threonine-protein kinase 4	mast2	Microtubule-associated serine/threonine kinase 2	26.6871	Contig687	0.975219	7.9327	0.00621731	1.81621	5.93202	1.84e-11	1.64899	5.93202	1.33e-09
dd_Smed_v6_12376_0_1	TMC5	Transmembrane channel-like protein 5	Tmc7	Transmembrane channel-like protein 7	5.10499	Contig5514	1.99562	7.83619	9.8e-05	3.19017	2.50916	2.12e-07	3.23711	2.50916	1.65e-07
dd_Smed_v6_1240_0_1	NA	NA	NA	NA	110.881	Contig708	2.12591	8.8606	4.87e-05	6.09792	6.70489	1.66e-58	6.16733	6.70489	2.19e-59
dd_Smed_v6_12427_0_1	TWNK	Twinkle protein, mitochondrial	mtDNA-helicase	LD38710p	6.37535	Contig1941	0.402888	6.24154	0.0245536	1.83838	2.35959	0.00391665	1.73253	2.35959	0.00778692
dd_Smed_v6_12502_0_1	NA	NA	CG10527	Uncharacterized protein	37.5907	Contig2019	1.13179	6.65286	0.000515484	3.57567	4.49724	4e-11	3.7292	4.49724	8.38e-12
dd_Smed_v6_1251_0_1	FHL3	FHL3 protein	FHL3	FHL3 protein	266.268	Contig1621	2.06458	9.49822	0.000208674	2.72641	7.62808	4.38e-17	1.36362	7.62808	3e-05
dd_Smed_v6_1255_0_1	ATP6V1C1	V-type proton ATPase subunit C 1	atp6v1c1a	V-type proton ATPase subunit C 1-A	140.125	Contig313	1.83386	9.43891	8.57e-05	1.76378	7.82248	1.12e-09	1.63959	7.82248	1.85e-08
dd_Smed_v6_1261_0_1	FTMT	Ferritin, mitochondrial	wu:fj24c01	Ferritin	252.881	Contig1641	0.578235	8.96002	0.0115821	5.55835	7.63427	7.74e-67	5.37359	7.63427	1.88e-63
dd_Smed_v6_1266_0_1	NA	NA	pck	EG:80H7.2 protein	77.4735	Contig3864	1.09926	9.575	0.000448466	1.32805	6.2991	1.2e-06	1.02776	6.2991	0.000248153
dd_Smed_v6_12821_0_1	SEC14L4	SEC14-like protein 4	Sec14l2	SEC14-like protein 2	3.9933	PL05003A1B05	0.707186	6.82015	0.0167254	5.53358	2.33496	2.15e-14	5.71592	2.33496	4.63e-15
dd_Smed_v6_12832_0_1	BEST3	Bestrophin-3	Best1	Bestrophin homolog	10.3116	Contig1818	1.4612	7.59574	0.000518824	3.77148	3.34614	2.41e-15	3.90483	3.34614	3.49e-16
dd_Smed_v6_1286_0_1	MAP2K6	Dual specificity mitogen-activated protein kinase kinase 6	MAP2K6	Dual specificity mitogen-activated protein kinase kinase 6	27.8779	Contig5250	0.653204	9.21758	0.00401029	1.63104	5.44632	1.48e-07	1.38472	5.44632	1.07e-05
dd_Smed_v6_12877_0_1	NA	NA	NA	NA	5.92911	Contig6044	1.05807	7.03278	0.00546095	6.3682	2.69576	1.79e-14	6.66261	2.69576	2.17e-15
dd_Smed_v6_12893_0_1	FAM102A	Protein FAM102A	CG8671	CG8671, isoform B	3.34864	Contig3509	1.12155	6.97962	0.00635961	3.45649	1.92209	6.32e-05	3.0819	1.92209	0.000388642
dd_Smed_v6_1294_0_1	NA	NA	NA	NA	14.5826	Contig4582	0.915487	9.52315	0.000478294	1.8454	5.451	5.5e-10	1.52018	5.451	4.28e-07
dd_Smed_v6_1296_0_1	NA	NA	NA	NA	358.989	PL04006B2G08	0.889656	8.01214	0.0266751	1.80281	8.07426	1.02e-05	1.65739	8.07426	6.03e-05
dd_Smed_v6_1297_0_1	PEPD	Xaa-Pro dipeptidase	PEPD	Xaa-Pro dipeptidase	203.227	Contig244	0.976436	8.27983	0.000581297	1.54607	8.53	2.65e-06	1.32962	8.53	6.97e-05
dd_Smed_v6_1298_0_1	NA	NA	NA	NA	24.0957	PL05002B1B07	1.39489	7.43196	0.00377557	3.94642	5.45659	1.56e-32	3.76259	5.45659	4.61e-30
dd_Smed_v6_12990_0_1	SLC8A1	Sodium/calcium exchanger 1	Slc8a1	Sodium/calcium exchanger 1	15.6484	Contig4568	1.12438	7.43271	0.000157806	6.03549	3.27158	1.99e-18	5.50152	3.27158	5.24e-16
dd_Smed_v6_1300_0_1	NA	NA	NA	NA	39.1771	Contig2978	0.940965	8.35929	0.000347243	1.18051	6.01722	0.000118556	1.11692	6.01722	0.00033328
dd_Smed_v6_1306_0_1	PLA2G15	Group XV phospholipase A2	PLA2G15	Group XV phospholipase A2	55.4672	Contig6532	2.10067	8.65579	0.000603953	1.63783	6.52792	6.34e-08	1.30135	6.52792	2.35e-05
dd_Smed_v6_1308_0_1	TRAF2	TNF receptor-associated factor 2	Traf5	TNF receptor-associated factor 5	57.7168	Contig4033	2.76581	8.99044	2.44e-05	5.46237	7.38743	6.59e-57	5.24167	7.38743	1.76e-53
dd_Smed_v6_1311_0_1	VAMP3	Vesicle-associated membrane protein 3	vamp3	Vesicle-associated membrane protein 3 (Cellubrevin)	63.9376	Contig3395	2.1577	9.62302	6.8e-05	2.64042	5.09845	5.54e-13	2.58472	5.09845	1.86e-12
dd_Smed_v6_1322_0_1	MAPRE1	Microtubule-associated protein RP/EB family member 1	Mapre1	Microtubule-associated protein RP/EB family member 1	74.2652	Contig2028	0.58268	8.42947	0.00227069	1.39987	7.12935	2.85e-05	1.20053	7.12935	0.000434258
dd_Smed_v6_1325_0_1	ZMYM1	Zinc finger MYM-type protein 1	ZMYM1	Zinc finger MYM-type protein 1	14.9135	Contig6015	1.22045	8.02936	0.00361635	3.87985	5.6238	1.68e-25	4.03338	5.6238	4.2e-27
dd_Smed_v6_1328_0_1	NA	NA	NA	NA	188.172	Contig1505	2.57739	9.80464	3.43e-05	1.29284	8.02843	1.36e-05	1.31352	8.02843	1.12e-05
dd_Smed_v6_1333_0_1	NA	NA	CG10527	Uncharacterized protein	34.966	Contig1106	3.54494	10.6598	2.65e-05	5.59033	4.68589	7.19e-14	5.60968	4.68589	7.12e-14
dd_Smed_v6_1334_0_1	BPNT1	3'(2'),5'-bisphosphate nucleotidase 1	BPNT1	3'(2'),5'-bisphosphate nucleotidase 1	53.4244	Contig4084	1.07087	8.64174	0.000231671	2.25513	6.19294	4.39e-17	1.95038	6.19294	3.66e-13
dd_Smed_v6_1335_0_1	CHMP2A	Charged multivesicular body protein 2a	chmp2a	Charged multivesicular body protein 2a	104.776	Contig2278	1.0801	7.27253	0.000215767	1.27776	6.55855	7.71e-06	1.22497	6.55855	2.16e-05
dd_Smed_v6_1339_0_1	ALDH2	Aldehyde dehydrogenase, mitochondrial	Aldh2	Aldehyde dehydrogenase, mitochondrial	86.8334	Contig2274	0.683624	8.50997	0.00117931	2.4886	7.2243	1.28e-12	2.39515	7.2243	9.42e-12
dd_Smed_v6_1351_0_1	PRCP	Lysosomal Pro-X carboxypeptidase	Prcp	Lysosomal Pro-X carboxypeptidase	21.037	Contig1592	2.60844	10.2491	2.61e-05	2.96403	5.16942	1.41e-11	2.94715	5.16942	2.14e-11
dd_Smed_v6_1354_0_1	SNX3	Sorting nexin-3	Snx3	RE52028p	179.643	Contig7280	1.04545	8.14359	0.00774402	1.99378	6.90044	5.36e-11	1.9364	6.90044	2.19e-10
dd_Smed_v6_1358_0_1	COMMD5	COMM domain-containing protein 5	COMMD5	COMM domain-containing protein 5	48.4238	Contig1531	1.15059	8.29897	0.000237502	1.26103	5.70303	0.000650155	1.05405	5.70303	0.00586429
dd_Smed_v6_1362_0_1	PRKAR2B	Protein kinase, cAMP-dependent, regulatory, type II, beta	Pka-R2	cAMP-dependent protein kinase type II regulatory subunit	103.828	Contig2024	2.48642	9.76396	7.46e-05	5.98963	6.96283	9.96e-68	5.96612	6.96283	5.18e-67
dd_Smed_v6_1364_0_1	UBQLN1	Ubiquilin-1	Ubqln1	Ubiquilin-1	29.0282	Contig2009	0.769993	8.47731	0.00158332	1.49624	5.86421	1.3e-07	0.979543	5.86421	0.000870128
dd_Smed_v6_1365_0_1	M6PR	Cation-dependent mannose-6-phosphate receptor	M6PR	Cation-dependent mannose-6-phosphate receptor	167.711	Contig1301	2.127	9.74005	3.81e-05	1.94252	7.611	1.89e-11	1.8519	7.611	1.83e-10
dd_Smed_v6_1369_0_1	ATP6V1E1	ATPase, H+ transporting, lysosomal 31kDa, V1 subunit E isoform 1	atp6v1e1b	ATPase, H+-transporting, lysosomal, V1 subunit E1b	195.719	Contig208	1.84445	8.63963	0.000407098	2.27974	7.82395	6.34e-16	2.02564	7.82395	6.94e-13
dd_Smed_v6_13694_0_1	NA	NA	NA	NA	10.0673	Contig1846	2.40312	7.68056	0.00057209	8.10665	3.03495	2.05e-23	7.66803	3.03495	1.81e-21
dd_Smed_v6_1371_0_1	DSTYK	Dual serine/threonine and tyrosine protein kinase	Dstyk	Dual serine/threonine and tyrosine protein kinase	28.1951	Contig5023	2.33855	9.39682	2.29e-05	2.72298	6.3565	1.04e-19	2.68061	6.3565	3.92e-19
dd_Smed_v6_1373_1_1	PDCD6IP	Programmed cell death 6-interacting protein	ALiX	ALG-2 interacting protein X	21.2566	Contig4912	1.2147	9.01283	0.000390024	1.29385	6.07522	3e-05	1.18267	6.07522	0.000170025
dd_Smed_v6_13811_0_1	TRAF6	TNF receptor-associated factor 6	Traf6	TNF receptor-associated factor 6	9.85745	PL08008A1G07	1.72056	7.43695	0.00164875	7.36062	2.48842	6.39e-20	7.16265	2.48842	4.63e-19
dd_Smed_v6_1388_0_1	NA	NA	NA	NA	62.127	Contig7504	1.66937	8.66799	0.000734947	2.33524	5.45361	1.72e-12	2.51404	5.45361	4.06e-14
dd_Smed_v6_1391_0_1	ATP6V1D	V-type proton ATPase subunit D	ATP6V1D	V-type proton ATPase subunit D	130.523	Contig5665	1.37	9.57585	0.000324066	1.64139	7.20724	8.42e-08	1.55381	7.20724	4.77e-07
dd_Smed_v6_1394_0_1	NA	NA	NA	NA	73.1875	Contig277	0.491939	9.63279	0.0213951	4.65089	4.1669	1.36e-21	4.51481	4.1669	1.45e-20
dd_Smed_v6_1395_0_1	RNF34	E3 ubiquitin-protein ligase RNF34	RNF34	E3 ubiquitin-protein ligase RNF34	100.177	Contig4849	1.78567	8.93184	9.98e-05	1.74214	6.95139	4.24e-07	1.59229	6.95139	4.66e-06
dd_Smed_v6_14059_0_1	EIF4G1	Eukaryotic translation initiation factor 4 gamma 1	NAT1	NAT1, isoform D	6.14642	Contig728	0.540474	5.86965	0.0142639	11.0815	2.78129	8.11e-31	10.973	2.78129	3.16e-30
dd_Smed_v6_1406_0_1	NA	NA	NA	NA	300.428	Contig2655	2.86466	9.18277	8.47e-05	7.46465	7.36268	3.91e-17	7.68245	7.36268	1.01e-17
dd_Smed_v6_14195_0_1	NA	NA	NA	NA	5.85966	Contig3521	1.45769	6.58338	0.000303563	4.61537	3.3733	7.81e-23	4.80678	3.3733	2.4e-24
dd_Smed_v6_1433_0_1	VAPA	Vesicle-associated membrane protein-associated protein A	VAPA	Vesicle-associated membrane protein-associated protein A	232.249	Contig5553	1.6786	9.40112	0.000181975	1.51856	7.7989	1.04e-07	1.47597	7.7989	2.81e-07
dd_Smed_v6_1439_0_1	TRAF6	TNF receptor-associated factor 6	TRAF6	TNF receptor-associated factor 6	31.8047	Contig4173	0.469025	7.90418	0.0068361	1.23262	5.68994	5.03e-06	1.01266	5.68994	0.000245124
dd_Smed_v6_1447_0_1	PIEZO2	Piezo-type mechanosensitive ion channel component 2	PIEZO2	Piezo-type mechanosensitive ion channel component 2	54.3957	Contig4398	2.57139	8.90881	0.00170001	2.73551	7.40994	1.6e-25	2.61011	7.40994	1.78e-23
dd_Smed_v6_1450_0_1	RAP2C	Ras-related protein Rap-2c	RAP2C	Ras-related protein Rap-2c	59.678	Contig6592	0.860635	7.13239	0.00696968	1.62275	6.24124	3.16e-07	1.61944	6.24124	3.93e-07
dd_Smed_v6_1451_0_1	NA	NA	NA	NA	137.089	Contig1785	2.20389	11.2812	3.86e-05	1.76544	7.13441	2.12e-09	1.54902	7.13441	1.92e-07
dd_Smed_v6_1452_0_1	ATP6V1H	V-type proton ATPase subunit H	atp6v1h	ATPase, H+ transporting, lysosomal, V1 subunit H	33.3105	Contig5284	1.93985	9.96259	4.98e-05	2.4074	5.71563	1.78e-14	2.19096	5.71563	3.14e-12
dd_Smed_v6_1455_0_1	ZNF346	Zinc finger protein 346	Zn72D	GH12756p	71.9689	Contig2355	0.390829	7.51017	0.0335063	3.48039	6.28035	2.97e-19	3.1897	6.28035	1.24e-16
dd_Smed_v6_1462_0_1	SGTB	Small glutamine-rich tetratricopeptide repeat-containing protein beta	Sgtb	Small glutamine-rich tetratricopeptide repeat-containing protein beta	77.8232	Contig3761	0.525481	7.94758	0.00515858	1.14594	6.9478	7.06e-05	1.11874	6.9478	0.00012291
dd_Smed_v6_1463_0_1	PICALM	Phosphatidylinositol-binding clathrin assembly protein	lap	Phosphatidylinositol-binding clathrin assembly protein LAP	44.3462	Contig1792	1.40497	7.98542	0.000107799	1.60542	6.758	1.96e-07	1.53021	6.758	8.61e-07
dd_Smed_v6_1467_0_1	EFHD1	EF-hand domain-containing protein D1	EFHD1	EF-hand domain-containing protein D1	292.013	Contig658	2.38586	9.30142	8.55e-05	2.05707	8.23348	7.42e-14	1.8851	8.23348	8.14e-12
dd_Smed_v6_1471_0_1	NA	NA	NA	NA	277.469	Contig68	0.539234	8.52406	0.0367917	4.8499	8.17985	2.91e-40	4.82833	8.17985	5.69e-40
dd_Smed_v6_1480_0_1	APMAP	Adipocyte plasma membrane-associated protein	apmap	Adipocyte plasma membrane-associated protein	73.041	Contig1622	1.00754	8.07947	0.000963981	3.30337	6.45046	7.42e-28	3.48486	6.45046	2.07e-30
dd_Smed_v6_14832_0_1	TSTD1	Thiosulfate sulfurtransferase/rhodanese-like domain-containing protein 1	Tstd1	Thiosulfate sulfurtransferase (rhodanese)-like domain-containing 1	4.67963	Contig6763	0.470862	6.58728	0.0134133	2.01223	1.82305	0.00911038	0.660291	1.82305	0.502658
dd_Smed_v6_1493_0_1	ALDH7A1	Alpha-aminoadipic semialdehyde dehydrogenase	aldh7a1	Aldehyde dehydrogenase 7 family, member A1	69.025	Contig2695	0.575493	7.8986	0.00798357	1.57752	7.09794	6e-08	1.26561	7.09794	1.9e-05
dd_Smed_v6_1494_0_1	ATP6V1E1	ATPase, H+ transporting, lysosomal 31kDa, V1 subunit E isoform 1	Vha26	V-type proton ATPase subunit E	275.904	Contig317	2.00837	9.39416	0.000365107	1.95435	7.91442	1.93e-12	1.74449	7.91442	3.97e-10
dd_Smed_v6_1504_0_1	CHP1	Calcineurin B homologous protein 1	CHP1	Calcineurin B homologous protein 1	92.134	Contig3171	0.7926	8.81661	0.000854917	1.68839	6.36067	1.98e-09	1.67706	6.36067	3.03e-09
dd_Smed_v6_1505_0_1	TGFBI	Transforming growth factor-beta-induced protein ig-h3	postnb	Periostin, osteoblast specific factor	335.481	Contig1042	1.06299	9.56605	0.000359012	6.16897	9.45284	1.37e-63	5.94473	9.45284	3.19e-60
dd_Smed_v6_1513_0_1	SLC31A1	High affinity copper uptake protein 1	slc31a1	Solute carrier family 31 (copper transporter), member 1	36.1447	Contig1777	1.75612	9.69377	7.55e-05	3.21921	4.49224	5.8e-06	3.41078	4.49224	2.01e-06
dd_Smed_v6_1514_0_1	CHMP2B	Charged multivesicular body protein 2b	CHMP2B	Charged multivesicular body protein 2b	129.212	Contig2325	2.17208	8.99775	2.73e-05	2.22208	6.76187	1.07e-16	2.11302	6.76187	3.16e-15
dd_Smed_v6_1517_0_1	GSTM4	Glutathione S-transferase Mu 4	Gstm4	Glutathione S-transferase mu 4	75.9927	Contig1944	0.528224	9.40035	0.0051287	1.77989	6.39848	1.7e-08	1.6552	6.39848	1.93e-07
dd_Smed_v6_1518_0_1	CLSTN1	Calsyntenin-1	clstn1	Calsyntenin 1	23.491	Contig3071	1.01607	8.27174	0.000610396	1.13942	6.35755	9.89e-05	0.983522	6.35755	0.00104103
dd_Smed_v6_15390_0_1	NA	NA	NA	NA	8.78274	Contig7706	0.577895	6.099	0.0158173	4.08717	3.69978	1.18e-17	4.05306	3.69978	2.25e-17
dd_Smed_v6_154_0_1	PLIN5	Perilipin-5	Plin5	Perilipin-5	715.221	Contig1083	3.04998	11.7446	0.000108486	3.36044	9.9159	1.99e-22	3.18643	9.9159	1.79e-20
dd_Smed_v6_1542_0_1	NA	NA	Tmem45b	Transmembrane protein 45B	19.1587	Contig3692	0.940056	9.26636	0.000443366	2.42879	4.34361	1.64e-11	2.12255	4.34361	4.41e-09
dd_Smed_v6_1544_0_1	SCAMP1	Secretory carrier-associated membrane protein 1	SCAMP1	Secretory carrier-associated membrane protein 1	143.284	Contig951	2.48172	9.05607	2.53e-05	3.14956	7.34655	1.23e-24	3.10972	7.34655	4.45e-24
dd_Smed_v6_1553_0_1	NA	NA	NA	NA	104.237	Contig213	2.32055	9.50172	9.67e-05	7.15508	5.56194	2.8e-16	7.49062	5.56194	3.09e-17
dd_Smed_v6_1558_0_1	NA	NA	NA	NA	160.755	Contig67	0.583426	8.73333	0.00829222	1.35391	6.5263	0.00138628	1.27575	6.5263	0.00314623
dd_Smed_v6_1559_0_1	BCAP31	B-cell receptor-associated protein 31	bcap29	B-cell receptor-associated protein 29	78.8089	Contig1500	1.1055	8.04686	0.000233891	1.61032	6.33668	4.86e-09	1.51948	6.33668	4.2e-08
dd_Smed_v6_1562_0_1	TMX1	Thioredoxin-related transmembrane protein 1	tmx1	Thioredoxin-related transmembrane protein 1	43.6024	Contig1419	0.870078	9.13249	0.00050225	1.81607	5.33816	4.34e-06	1.49077	5.33816	0.00020741
dd_Smed_v6_1563_0_1	CLINT1	Clathrin interactor 1	clint1a	Enthoprotin	8.14361	Contig6480	1.31563	8.57048	0.00903285	3.12719	3.98536	1.54e-07	2.74576	3.98536	4.15e-06
dd_Smed_v6_1565_0_1	LIPF	Gastric triacylglycerol lipase	lipf	Lipase	133.921	Contig6356	3.5441	10.5223	0.000888513	5.70547	7.51278	7.21e-72	5.60437	7.51278	9.44e-70
dd_Smed_v6_1584_0_1	UPB1	Beta-ureidopropionase	UPB1	Beta-ureidopropionase	23.5884	Contig2599	2.4153	10.1199	6e-05	3.35832	5.13439	5.79e-20	2.88165	5.13439	2.15e-15
dd_Smed_v6_1585_0_1	CBS	Cystathionine beta-synthase	CBS	Cystathionine beta-synthase	76.2029	Contig1264	1.53947	9.98987	0.000123728	2.42991	7.14177	1.03e-17	2.43456	7.14177	1.02e-17
dd_Smed_v6_1587_0_1	NA	NA	NA	NA	179.873	Contig1222	2.39991	9.36544	2.61e-05	5.18926	6.95123	8.59e-63	5.10603	6.95123	4.03e-61
dd_Smed_v6_1589_0_1	ATP6V1F	V-type proton ATPase subunit F	atp6v1f	V-type proton ATPase subunit F	193.438	Contig6464	1.67049	9.08835	0.00233211	2.04661	6.82039	4.87e-14	1.8089	6.82039	3.11e-11
dd_Smed_v6_1595_0_1	NA	NA	NA	NA	190.078	Contig6667	1.93291	8.49089	0.00226036	5.9596	7.67422	1.34e-66	5.74473	7.67422	5.11e-63
dd_Smed_v6_1599_0_1	CORO1B	Coronin-1B	coro	Coronin	56.8292	Contig6501	1.06241	8.36798	0.00187012	1.0964	7.22	0.000141836	0.965079	7.22	0.00106619
dd_Smed_v6_160_0_1	DBI	Acyl-CoA-binding protein	DBI	Acyl-CoA-binding protein	1920.89	Contig391	1.31983	10.8415	0.000187331	1.9198	9.93605	1.32e-08	1.79804	9.93605	1.24e-07
dd_Smed_v6_162_0_1	GRN	Granulins	Grn	Granulins	16.2366	PL06004A1G01	3.10631	11.3787	0.000640308	2.50558	1.8717	0.00506394	2.63925	1.8717	0.00349623
dd_Smed_v6_1621_0_1	ALDH8A1	Aldehyde dehydrogenase family 8 member A1	ALDH8A1	Aldehyde dehydrogenase family 8 member A1	56.355	PL06013B2E03	1.38227	7.55138	0.00440355	7.43451	6.31265	6.03e-27	7.60306	6.31265	1.02e-27
dd_Smed_v6_1622_0_1	ATP6V0B	V-type proton ATPase 21 kDa proteolipid subunit	Atp6v0b	V-type proton ATPase 21 kDa proteolipid subunit	468.944	Contig133	2.02982	10.5283	2.34e-05	2.17098	8.83269	1.22e-14	1.93739	8.83269	6.33e-12
dd_Smed_v6_1626_0_1	MYO1E	Unconventional myosin-Ie	myo1eb	Zgc:64042	15.6496	Contig59	0.644912	6.4948	0.00358708	1.18678	6.50225	6.25e-06	1.15468	6.50225	1.31e-05
dd_Smed_v6_1630_0_1	STK24	Serine/threonine-protein kinase 24	map3k19	Mitogen-activated protein kinase kinase kinase 19	206.568	Contig353	1.34155	8.86765	0.000213801	1.91618	8.44571	3.09e-10	1.80393	8.44571	3.73e-09
dd_Smed_v6_1633_0_1	SPTLC2	Serine palmitoyltransferase 2	Sptlc2	Serine palmitoyltransferase 2	49.4609	Contig3749	1.51285	10.0769	6.48e-05	1.53559	6.63802	6e-07	1.3599	6.63802	1.26e-05
dd_Smed_v6_1643_0_1	DNASE2	Deoxyribonuclease-2-alpha	crn-7	Cell-death-related nuclease 7	21.182	Contig4893	1.79594	8.15059	0.0103185	2.53943	4.62243	1.81e-08	2.51469	4.62243	2.89e-08
dd_Smed_v6_1644_0_1	GALNT10	Polypeptide N-acetylgalactosaminyltransferase 10	gly-10	Putative polypeptide N-acetylgalactosaminyltransferase 10	27.6557	Contig4834	0.491385	7.30289	0.00743978	1.56949	5.84375	2.45e-08	1.1023	5.84375	0.000135784
dd_Smed_v6_1645_0_1	CHMP1A	Charged multivesicular body protein 1a	CHMP1A	Charged multivesicular body protein 1a	145.788	Contig5740	1.49763	9.23796	0.00290899	1.20979	6.97335	4.95e-06	1.17173	6.97335	1.16e-05
dd_Smed_v6_1649_0_1	SATL1	Spermidine/spermine N(1)-acetyltransferase-like protein 1	Qrich2	Glutamine-rich 2	131.071	Contig1663	1.37513	9.68838	8.56e-05	2.04044	7.11405	5.41e-14	1.82547	7.11405	1.94e-11
dd_Smed_v6_1659_0_1	NA	NA	NA	NA	57.1504	Contig6284	0.96761	8.28652	0.0052685	1.62374	6.14527	2.33e-08	1.46423	6.14527	6.04e-07
dd_Smed_v6_1670_0_1	NDE1	Nuclear distribution protein nudE homolog 1	Nde1	Nuclear distribution protein nudE homolog 1	18.2169	Contig5433	0.475813	8.25468	0.0121281	0.923287	4.89884	0.00589392	1.13102	4.89884	0.000634544
dd_Smed_v6_1694_0_1	HNF4G	Hepatocyte nuclear factor 4-gamma	hnf4a	Hepatocyte nuclear factor 4 alpha	43.1554	Contig5288	0.848041	7.56078	0.000552714	2.09332	6.87078	2.66e-16	1.69013	6.87078	4.27e-11
dd_Smed_v6_17_0_1	NA	NA	cib	Ciboulot, isoform A	3363.73	Contig2023	3.5	12.5267	2.7e-05	3.19611	10.9948	6.99e-22	3.27604	10.9948	9.5e-23
dd_Smed_v6_1701_0_1	SNF8	Vacuolar-sorting protein SNF8	SNF8	Vacuolar-sorting protein SNF8	61.2276	Contig1765	1.22836	9.40036	8.49e-05	1.10607	5.85353	0.000230034	1.06401	5.85353	0.000474531
dd_Smed_v6_1705_0_1	NA	NA	NA	NA	102.324	Contig82	0.846889	7.7636	0.00245213	2.03207	6.84357	2.06e-12	2.03749	6.84357	2.16e-12
dd_Smed_v6_1714_0_1	EVL	Ena/VASP-like protein	enah	Enabled homolog (Drosophila)	16.5738	Contig6116	1.39792	8.65343	0.00121753	2.04588	4.73129	1.94e-11	1.86987	4.73129	1.04e-09
dd_Smed_v6_1726_0_1	ASAH2	Neutral ceramidase	CDase	Neutral ceramidase	90.739	Contig2188	0.671064	8.93012	0.00926523	3.03856	7.74731	3.7e-27	2.24785	7.74731	4.87e-16
dd_Smed_v6_1727_0_1	VPS29	Vacuolar protein sorting-associated protein 29	vps29	Vacuolar protein sorting-associated protein 29	113.284	Contig2859	1.62136	9.92688	0.000126609	2.0468	6.36473	4.61e-11	1.79155	6.36473	9.98e-09
dd_Smed_v6_1736_0_1	NA	NA	Faxc	Failed axon connections homolog	49.7465	Contig5171	2.39713	8.41727	7.82e-05	2.77001	5.88877	1.67e-18	2.52303	5.88877	1.07e-15
dd_Smed_v6_1738_0_1	SLC12A9	Solute carrier family 12 member 9	Slc12a9	Solute carrier family 12 member 9	10.2468	Contig5531	1.92185	8.89198	4.13e-05	3.56662	4.98094	5.09e-11	3.2654	4.98094	1.61e-09
dd_Smed_v6_1743_0_1	HACD2	Very-long-chain (3R)-3-hydroxyacyl-CoA dehydratase 2	HACD2	Very-long-chain (3R)-3-hydroxyacyl-CoA dehydratase 2	187.645	Contig2821	0.695915	9.46702	0.00127581	1.656	7.06877	1.38e-08	1.45337	7.06877	8.24e-07
dd_Smed_v6_1754_0_1	NA	NA	NA	NA	134.137	Contig3907	0.512101	7.07404	0.0119413	5.48041	6.19328	7.27e-50	5.45805	6.19328	1.61e-49
dd_Smed_v6_1757_0_1	NA	NA	NA	NA	111.114	Contig2156	1.56517	8.87441	0.000570511	2.27686	7.88356	1.03e-13	2.08467	7.88356	1.06e-11
dd_Smed_v6_1758_0_1	L2HGDH	L-2-hydroxyglutarate dehydrogenase, mitochondrial	L2HGDH	L-2-hydroxyglutarate dehydrogenase, mitochondrial	99.0069	Contig5679	1.2367	9.16336	0.000154762	1.4064	7.4649	5.34e-07	1.36028	7.4649	1.5e-06
dd_Smed_v6_1762_0_1	CHMP6	Charged multivesicular body protein 6	Chmp6	Charged multivesicular body protein 6	39.3496	Contig3012	1.35243	8.86986	0.000921643	1.62839	5.02926	3.16e-07	1.19403	5.02926	0.000257119
dd_Smed_v6_1767_0_1	BAK1	Bcl-2 homologous antagonist/killer	Bak1	Bcl-2 homologous antagonist/killer	242.435	Contig2592	0.392408	9.21272	0.0155099	1.00541	7.85183	0.00120302	0.91969	7.85183	0.00386847
dd_Smed_v6_1769_0_1	NA	NA	aspdh	Putative L-aspartate dehydrogenase	222.638	Contig2007	2.10244	9.35412	8.31e-05	3.51962	8.02072	4.2e-33	3.4667	8.02072	3.09e-32
dd_Smed_v6_1773_0_1	GNAI1	Guanine nucleotide-binding protein G(i) subunit alpha-1	GNAI1	Guanine nucleotide-binding protein G(i) subunit alpha-1	30.3819	Contig3229	1.64458	7.78283	0.000126609	3.43255	5.24036	1.52e-15	3.42432	5.24036	2e-15
dd_Smed_v6_1785_0_1	NA	NA	NA	NA	145.851	Contig1571	1.94278	9.98928	0.000495373	1.17676	6.6703	0.000717718	1.56997	6.6703	5.16e-06
dd_Smed_v6_1794_0_1	COMTD1	Catechol O-methyltransferase domain-containing protein 1	COMTD1	Catechol O-methyltransferase domain-containing protein 1	129.14	Contig1726	0.813691	8.80882	0.00178807	1.46856	6.8327	1.16e-05	1.16487	6.8327	0.00069378
dd_Smed_v6_1796_0_1	RTN1	Reticulon-1	rtn1a	Reticulon	125.673	Contig258	1.70575	9.2833	0.000121334	1.14702	8.04303	6.76e-05	1.11302	8.04303	0.00013086
dd_Smed_v6_1798_0_1	SYP	Synaptophysin	sypl2a	Synaptophysin-like 2a	96.1334	Contig22	2.71411	10.2559	2.65e-05	2.80997	6.46546	4.67e-21	2.91	6.46546	2.61e-22
dd_Smed_v6_1802_0_1	RBCK1	RanBP-type and C3HC4-type zinc finger-containing protein 1	rbck1	RanBP-type and C3HC4-type zinc finger-containing protein 1	47.1673	PL06018A1C05	0.45508	6.61125	0.0375203	1.15546	6.264	2.65e-05	0.957175	6.264	0.000687416
dd_Smed_v6_1808_0_1	NA	NA	Tsp74F	Tetraspanin	90.4259	Contig1063	0.887169	9.0115	0.000872092	1.24926	6.82111	5.09e-06	0.958062	6.82111	0.000681331
dd_Smed_v6_1823_0_1	SLC25A20	Mitochondrial carnitine/acylcarnitine carrier protein	slc25a20	Solute carrier family 25 (Carnitine/acylcarnitine translocase), member 20	156.596	Contig3880	0.484189	7.73307	0.00416941	2.29084	6.37716	1.84e-14	1.87529	6.37716	3.83e-10
dd_Smed_v6_1827_0_1	NPTN	Neuroplastin	NPTN	Neuroplastin	43.0184	Contig1035	0.531244	9.04511	0.0120004	0.901441	6.078	0.00141583	1.08421	6.078	0.000109266
dd_Smed_v6_1829_0_1	NA	NA	Mfsd1	Major facilitator superfamily domain-containing protein 1	22.3321	Contig2643	2.2229	9.92231	0.000406185	2.72559	5.41595	2.96e-15	2.61029	5.41595	4.06e-14
dd_Smed_v6_1830_0_1	PARD6B	Partitioning defective 6 homolog beta	par-6	LD29223p	14.5424	Contig3688	0.804207	9.00294	0.000826022	1.33285	4.26009	0.00325197	1.35116	4.26009	0.00321611
dd_Smed_v6_1835_0_1	BRK1	Protein BRICK1	Brk1	Protein BRICK1	74.9324	Contig1637	1.00399	8.5067	0.000817823	1.35413	5.06478	0.000131377	1.29077	5.06478	0.000323819
dd_Smed_v6_1836_0_1	ATP6V1G2	V-type proton ATPase subunit G 2	ATP6V1G2	V-type proton ATPase subunit G 2	125.24	Contig1130	2.03422	9.32733	0.000132083	1.33569	6.461	3.22e-07	1.32308	6.461	4.92e-07
dd_Smed_v6_184_0_1	NA	NA	NA	NA	1589.31	Contig3562	3.33768	9.87486	5.55e-05	2.55374	10.6321	2.1e-11	2.50275	10.6321	5.98e-11
dd_Smed_v6_1840_0_1	ATP6AP1	V-type proton ATPase subunit S1	atp6ap1b	ATPase, H+ transporting, lysosomal accessory protein 1	175.703	PL030008A20F11	2.09728	10.0192	0.00112173	2.45673	7.13741	4.51e-15	2.35529	7.13741	5.92e-14
dd_Smed_v6_1850_0_1	NA	NA	NA	NA	21.7598	Contig7543	1.07748	8.3883	0.000989852	1.54031	3.84861	7.48e-06	1.42382	3.84861	4.23e-05
dd_Smed_v6_1856_0_1	FAM49B	Protein FAM49B	fam49a	Family with sequence similarity 49, member A	31.5825	Contig2300	1.77252	8.73973	0.000133894	1.88651	5.57046	3.67e-10	1.70505	5.57046	1.83e-08
dd_Smed_v6_1865_0_1	C10orf11	Leucine-rich repeat-containing protein C10orf11	c13h10orf11	C10orf11 homolog (H. sapiens)	51.3078	PL030013A10D05	1.91462	8.31943	0.000956733	2.15895	5.53055	1.11e-14	2.27878	5.53055	4.34e-16
dd_Smed_v6_1874_0_1	SLC17A5	Sialin	slc17a5	Solute carrier family 17 (acidic sugar transporter), member 5	21.9642	Contig3687	2.54003	9.13616	2.44e-05	2.87412	5.38259	4.49e-10	3.12575	5.38259	1.83e-11
dd_Smed_v6_1884_1_1	HGSNAT	Heparan-alpha-glucosaminide N-acetyltransferase	hgsnat	Heparan-alpha-glucosaminide N-acetyltransferase	13.4023	PL030004A20F10	0.785888	7.61397	0.00918821	2.14584	4.79031	7.12e-11	2.07553	4.79031	3.34e-10
dd_Smed_v6_1889_0_1	ETFA	Electron transfer flavoprotein subunit alpha, mitochondrial	etfa	Electron-transfer-flavoprotein, alpha polypeptide	175.314	Contig5577	0.542793	8.1613	0.00970674	1.10958	6.77019	6.71e-05	0.902947	6.77019	0.00165664
dd_Smed_v6_1890_0_1	NA	NA	crim	Crimpled	28.9933	Contig141	0.8059	9.29743	0.0041879	1.60149	4.29724	0.00483004	1.70197	4.29724	0.00296943
dd_Smed_v6_1894_0_1	PLD3	Phospholipase D3	PLD3	Phospholipase D3	22.7908	Contig2603	1.75891	8.71238	4.77e-05	2.0731	5.22702	5.54e-08	2.26019	5.22702	3.71e-09
dd_Smed_v6_1897_0_1	NEK4	Serine/threonine-protein kinase Nek4	NEK4	Serine/threonine-protein kinase Nek4	34.5784	Contig5760	0.861977	7.98277	0.00549419	1.04736	6.32684	9.79e-05	1.05889	6.32684	9.35e-05
dd_Smed_v6_1904_0_1	SLC37A3	Sugar phosphate exchanger 3	Slc37a3	Sugar phosphate exchanger 3	27.0803	Contig5470	1.41132	8.6412	5.77e-05	2.436	5.5612	1.48e-13	2.11178	5.5612	1.53e-10
dd_Smed_v6_1915_0_1	ATG3	Ubiquitin-like-conjugating enzyme ATG3	atg3	Ubiquitin-like-conjugating enzyme ATG3	108.887	Contig4580	1.35947	8.09951	0.000232768	1.99786	7.06596	4.49e-10	1.688	7.06596	1.7e-07
dd_Smed_v6_1916_0_1	CHL1	Neural cell adhesion molecule L1-like protein	Nrg	Neuroglian	11.9291	PL08005B1E08	0.64429	7.90941	0.00685018	1.03801	5.94715	0.000248305	0.635588	5.94715	0.0392637
dd_Smed_v6_1923_0_1	SMAD4	Mothers against decapentaplegic homolog	Med	Mothers against decapentaplegic homolog	11.5481	Contig6291	1.15914	8.66419	0.00147094	1.09221	5.45731	0.000173674	1.0327	5.45731	0.000471955
dd_Smed_v6_1924_1_1	OSTM1	Osteopetrosis-associated transmembrane protein 1	OSTM1	Osteopetrosis-associated transmembrane protein 1	26.2491	Contig2851	1.94576	8.90633	3.12e-05	2.04601	5.01022	8.61e-11	1.78641	5.01022	1.79e-08
dd_Smed_v6_1934_0_1	NEURL1B	E3 ubiquitin-protein ligase NEURL1B	neur	Protein neuralized	30.698	Contig5498	0.821539	7.65021	0.00184667	1.24574	5.69896	4.48e-06	1.05058	5.69896	0.000146707
dd_Smed_v6_1937_0_1	TOLLIP	Toll-interacting protein	tollip	Toll-interacting protein	34.2904	Contig340	0.840758	9.03341	0.00151087	1.12123	5.71334	0.000111178	1.04816	5.71334	0.000376532
dd_Smed_v6_194_0_1	MUC2	Mucin-2	Apoltp	Apolipoprotein lipid transfer particle	121.567	PL06019B1E01	2.28488	8.06221	0.000625496	6.17213	10.9109	6.48e-58	6.10603	10.9109	5.54e-57
dd_Smed_v6_1942_0_1	MAN2B1	Lysosomal alpha-mannosidase	man2b1	Alpha-mannosidase	17.1524	Contig5520	0.908077	6.72437	0.0295122	2.56637	5.7054	3.77e-15	2.60666	5.7054	1.68e-15
dd_Smed_v6_1976_0_1	ATP6V0D1	V-type proton ATPase subunit d 1	VhaAC39-1	V-type proton ATPase subunit d 1	165.032	Contig5406	2.00978	9.23157	0.000502705	1.73171	8.11194	9.14e-09	1.61322	8.11194	1.08e-07
dd_Smed_v6_1977_0_1	ELOVL4	Elongation of very long chain fatty acids protein 4	elovl7a	Elongation of very long chain fatty acids protein 7	35.6507	Contig2891	0.646801	8.61303	0.00239524	2.03168	5.26728	3.66e-11	2.02554	5.26728	4.91e-11
dd_Smed_v6_1978_0_1	AP3B2	AP-3 complex subunit beta-2	AP3B2	AP-3 complex subunit beta-2	15.7565	Contig1223	0.724862	6.75926	0.00770657	1.69299	5.93599	1.51e-10	1.51737	5.93599	1.22e-08
dd_Smed_v6_1981_0_1	ATP6V0E2	V-type proton ATPase subunit e 2	ATP6V0E2	V-type proton ATPase subunit e 2	89.0977	Contig4543	0.586264	7.08586	0.019954	2.57987	6.60178	5.62e-12	2.26892	6.60178	1.42e-09
dd_Smed_v6_1990_0_1	CHN2	Beta-chimaerin	chn2	Chimerin 2	32.6222	PL05012B1A10	1.62312	7.97171	0.00213005	1.84329	6.16205	2.53e-06	1.81345	6.16205	4.32e-06
dd_Smed_v6_20_0_1	HPGDS	Hematopoietic prostaglandin D synthase	HPGDS	Hematopoietic prostaglandin D synthase	5594.26	Contig217	4.02858	14.0476	2.34e-05	4.67758	12.0825	4.22e-35	4.65689	12.0825	7.67e-35
dd_Smed_v6_2001_0_1	UBB	Epididymis secretory protein Li 50	UBB	Epididymis secretory protein Li 50	106.204	Contig747	1.33039	8.83964	0.000119324	1.33489	6.34067	4.48e-06	1.29619	6.34067	9.95e-06
dd_Smed_v6_2006_0_1	IST1	IST1 homolog	Ist1	IST1 homolog	107.63	Contig5569	1.8998	9.89255	5.56e-05	1.87593	7.26393	7.77e-10	1.75936	7.26393	9.71e-09
dd_Smed_v6_2010_0_1	NA	NA	NA	NA	112.074	Contig7646	1.88413	8.1739	0.00100788	2.63987	6.35939	9.07e-20	2.3802	6.35939	1.87e-16
dd_Smed_v6_2011_0_1	EPHX3	Epoxide hydrolase 3	Ephx4	Epoxide hydrolase 4	64.3354	Contig6004	1.22927	8.12105	0.00403494	2.67617	6.33986	9.92e-22	2.71069	6.33986	3.6e-22
dd_Smed_v6_2012_0_1	COMMD10	COMM domain-containing protein 10	COMMD10	COMM domain-containing protein 10	92.3311	Contig343	1.48677	8.60292	0.000220749	1.13134	6.37521	0.000771942	1.02151	6.37521	0.00305013
dd_Smed_v6_2022_0_1	LPCAT1	Lysophosphatidylcholine acyltransferase 1	lpcat1	Lysophosphatidylcholine acyltransferase 1	20.7594	Contig4628	1.1019	8.9037	0.000147795	1.26873	5.34529	5.51e-06	1.23362	5.34529	1.17e-05
dd_Smed_v6_2031_0_1	NOTCH3	Neurogenic locus notch homolog protein 3	Svep1	Sushi, von Willebrand factor type A, EGF and pentraxin domain-containing protein 1	33.8357	Contig6326	1.6639	8.21781	0.00185386	1.96492	5.59227	6.25e-12	1.87739	5.59227	6.03e-11
dd_Smed_v6_2032_0_1	EPB41L2	EPB41L2 protein	EPB41L2	EPB41L2 protein	51.3123	Contig7446	0.661844	6.56144	0.0473828	1.20794	7.69242	4.36e-05	1.00079	7.69242	0.000971373
dd_Smed_v6_2042_0_1	NA	NA	NA	NA	92.8784	Contig6660	2.04783	8.73103	0.000948001	1.45288	5.87694	1.32e-06	1.53452	5.87694	3.58e-07
dd_Smed_v6_2044_0_1	TPRG1L	Tumor protein p63-regulated gene 1-like protein	Tprg1l	Tumor protein p63-regulated gene 1-like protein	126.611	Contig1	1.28325	9.58847	0.000102681	1.63694	7.03431	2.14e-09	1.42714	7.03431	2.4e-07
dd_Smed_v6_2061_0_1	NA	NA	CG3884	RE21371p	182.661	Contig776	2.09441	8.38225	7.79e-05	3.85221	6.86321	1.37e-31	3.79706	6.86321	8.03e-31
dd_Smed_v6_2075_0_1	PANK1	Pantothenate kinase 1	Pank3	Pantothenate kinase 3	116.141	Contig5043	1.91154	9.07549	8.63e-05	2.57659	7.20409	5.67e-19	2.78592	7.20409	1.16e-21
dd_Smed_v6_2076_0_1	PGRMC2	Membrane-associated progesterone receptor component 2	MSBP	LD12946p	28.9407	Contig3231	0.623873	6.94807	0.0249652	1.11914	5.79456	0.000250567	1.05481	5.79456	0.000683259
dd_Smed_v6_2083_0_1	CYP2A13	Cytochrome P450 2A13	Cyp2j6	Cytochrome P450 2J6	20.3393	Contig4575	0.879353	7.77391	0.000644189	3.05544	5.36453	1.3e-13	3.26074	5.36453	4.4e-15
dd_Smed_v6_2084_0_1	BEST2	Bestrophin-2	Best1	Bestrophin homolog	27.0151	Contig1597	1.99506	8.0676	0.00012255	2.11483	5.68053	6.53e-15	2.20752	5.68053	4.99e-16
dd_Smed_v6_2087_0_1	PISD	Phosphatidylserine decarboxylase proenzyme, mitochondrial	Pisd	Phosphatidylserine decarboxylase proenzyme, mitochondrial	66.3271	PL04006B1F08	0.890258	7.74739	0.00239393	2.61506	6.91392	1.54e-14	2.65246	6.91392	7.95e-15
dd_Smed_v6_2096_0_1	RDH13	Retinol dehydrogenase 13	CG2064	CG2064	40.926	Contig5365	1.49602	9.394	7.19e-05	2.24789	5.70108	2.65e-15	2.13031	5.70108	7.13e-14
dd_Smed_v6_2097_0_1	NA	NA	NA	NA	31.222	Contig7349	2.11986	7.72837	0.00229584	2.9012	4.16994	1.14e-15	2.92266	4.16994	8.13e-16
dd_Smed_v6_2099_0_1	RAB4A	Ras-related protein Rab-4A	RAB4A	Ras-related protein Rab-4A	50.9475	Contig942	0.8304	8.69624	0.00106692	1.38109	5.81825	6.24e-07	1.25123	5.81825	8.12e-06
dd_Smed_v6_2104_0_1	BIRC2	Baculoviral IAP repeat-containing protein 2	Diap2	Death-associated inhibitor of apoptosis 2	190.791	Contig778	2.13638	8.64889	9.61e-05	2.17291	7.26344	7.78e-16	2.03526	7.26344	4.74e-14
dd_Smed_v6_2106_0_1	MAP2K6	Dual specificity mitogen-activated protein kinase kinase 6	MAP2K6	Dual specificity mitogen-activated protein kinase kinase 6	16.2153	Contig1542	1.60991	9.40573	4.53e-05	1.85814	4.7223	0.000102874	1.60602	4.7223	0.000996512
dd_Smed_v6_2112_0_1	USP4	Ubiquitin specific peptidase 4 (Proto-oncogene), isoform CRA_b	Usp4	Ubiquitin carboxyl-terminal hydrolase 4	13.1189	Contig937	1.73726	8.83796	4.43e-05	2.18262	5.20775	6.17e-12	2.08931	5.20775	5.37e-11
dd_Smed_v6_212_0_1	NA	NA	NA	NA	70.5006	Contig1080	2.94842	11.8516	2.53e-05	3.16549	7.02166	6.26e-27	2.9744	7.02166	3.42e-24
dd_Smed_v6_2129_0_1	STAM2	Signal transducing adapter molecule 2	STAM2	Signal transducing adapter molecule 2	20.3378	Contig7489	0.830294	7.97303	0.00912569	1.37451	5.40711	1.58e-06	1.14333	5.40711	8.87e-05
dd_Smed_v6_2131_0_1	NA	NA	Lamp1	Lysosome-associated membrane glycoprotein 1	15.1109	Contig2529	2.41167	9.41011	0.000399959	2.10455	4.60618	1.07e-07	2.39595	4.60618	1.74e-09
dd_Smed_v6_2132_0_1	NA	NA	kune	RH22958p	58.0105	Contig4683	0.738158	9.22713	0.00175577	1.33191	5.85832	9.08e-06	1.32523	5.85832	1.16e-05
dd_Smed_v6_2137_0_1	LAMTOR2	Ragulator complex protein LAMTOR2	Lamtor2	Ragulator complex protein LAMTOR2	150.744	Contig623	1.26328	9.22851	0.00149063	1.8881	6.54812	2.33e-06	1.62281	6.54812	6.14e-05
dd_Smed_v6_2138_0_1	BARD1	BRCA1 associated RING domain 1	ankrd52	Serine/threonine-protein phosphatase 6 regulatory ankyrin repeat subunit C	31.4803	Contig2203	0.915335	6.95603	0.0369583	3.01194	4.22414	6.18e-19	2.6624	4.22414	2.85e-15
dd_Smed_v6_215_0_1	PSAP	Prosaposin	psap	Prosaposin	875.925	Contig3017	4.20168	11.3843	3.67e-05	6.50815	9.49577	7.15e-49	6.61362	9.49577	6.35e-50
dd_Smed_v6_2167_0_1	RAP1B	Ras-related protein Rap-1b	Rap1b	Ras-related protein Rap-1b	11.109	Contig5057	1.4256	7.88164	0.00331257	3.07727	3.39949	1.21e-08	2.29744	3.39949	2.11e-05
dd_Smed_v6_2183_0_1	DUSP22	Dual specificity protein phosphatase 22	Dusp15	Dual specificity protein phosphatase 15	31.7462	Contig3397	1.06676	8.85798	0.000865428	1.07305	5.38748	0.000110517	0.771547	5.38748	0.00835401
dd_Smed_v6_219_0_1	CTSC	Dipeptidyl peptidase 1	CTSC	Dipeptidyl peptidase 1	624.859	Contig6604	4.04494	12.287	0.000760785	3.21565	9.88523	4.95e-25	3.2137	9.88523	5.71e-25
dd_Smed_v6_2209_0_1	DLG5	Disks large homolog 5	zoo-1	ZO-1 (Zonula Occludens tight junctional protein) Ortholog	17.952	Contig2642	0.472474	8.28128	0.0122411	1.3196	6.34033	7.82e-06	1.39278	6.34033	2.6e-06
dd_Smed_v6_2219_0_1	HAL	Histidine ammonia-lyase	hal	Histidine ammonia-lyase	120.528	Contig6136	0.45527	8.39591	0.0419948	5.78735	6.93603	3.99e-64	5.67341	6.93603	3.94e-62
dd_Smed_v6_2224_0_1	ENPEP	Aminopeptidase	ENPEP	Aminopeptidase	5.45092	PL06012A1D10	0.513881	6.91594	0.027212	4.16877	4.0147	4.92e-11	4.34273	4.0147	1.17e-11
dd_Smed_v6_2228_0_1	ACF	Apobec-1 complementation factor, isoform CRA_b	rbm47	RNA-binding motif protein 47	57.1026	Contig5391	1.43904	7.64225	6.84e-05	1.81135	7.36128	1.32e-10	1.98677	7.36128	2.17e-12
dd_Smed_v6_2230_0_1	ATP1B2	Sodium/potassium-transporting ATPase subunit beta-2	nrv1	Sodium/potassium-transporting ATPase subunit beta-1	41.9094	Contig6169	1.70263	9.9018	0.000786581	2.58378	5.74516	6.7e-16	2.50762	5.74516	4.81e-15
dd_Smed_v6_2234_0_1	NA	NA	NA	NA	37.9117	Contig4042	0.476283	6.65178	0.0191412	1.64357	7.06147	2.67e-07	1.7736	7.06147	3.15e-08
dd_Smed_v6_2235_0_1	OSTF1	Osteoclast-stimulating factor 1	OSTF1	Osteoclast-stimulating factor 1	24.867	Contig516	1.08876	9.45134	0.000255874	1.2653	6.11762	2.6e-05	0.973511	6.11762	0.0017502
dd_Smed_v6_2239_0_1	PTP4A3	Protein tyrosine phosphatase type IVA 3	PRL-1	Putative prenylated protein tyrosine phosphatase	73.2862	Contig1506	1.1362	9.13973	0.00028237	1.48362	6.17402	2.46e-08	1.1785	6.17402	1.35e-05
dd_Smed_v6_22397_0_1	NA	NA	NA	NA	2.2514	Contig5050	0.423244	6.33798	0.0242633	5.24779	0.94541	0.000518087	5.39089	0.94541	0.00043924
dd_Smed_v6_2249_0_1	PEX13	Peroxisomal membrane protein PEX13	PEX13	Peroxisomal membrane protein PEX13	68.0811	Contig2483	0.631534	7.33601	0.0113006	1.67821	6.21972	3.9e-10	1.50183	6.21972	2.76e-08
dd_Smed_v6_2257_0_1	CYP3A43/CYP3A4	Cytochrome P450	Cyp3a41a	Cytochrome P450 3A41	27.3018	Contig7163	1.53985	8.01637	0.00314838	3.1366	5.90305	1e-18	3.00787	5.90305	2.12e-17
dd_Smed_v6_2260_0_1	NA	NA	NA	NA	56.8432	Contig5269	0.996316	8.07979	0.000350039	1.35458	7.56937	0.000118796	1.15012	7.56937	0.00145126
dd_Smed_v6_2262_0_1	NA	NA	NA	NA	128.839	Contig5960	2.07647	8.99958	0.000647427	1.08131	7.08756	0.000237317	1.12498	7.08756	0.000144013
dd_Smed_v6_2271_0_1	SNX32	Sorting nexin-32	SNX32	Sorting nexin-32	37.1998	Contig1649	1.0016	8.27237	0.000286079	2.32897	6.14152	4.06e-15	2.08555	6.14152	2.1e-12
dd_Smed_v6_2281_0_1	SFT2D1	Vesicle transport protein SFT2A	SFT2D1	Vesicle transport protein SFT2A	67.5265	Contig3158	1.53081	8.71991	9.87e-05	1.59694	5.9173	8.11e-09	1.45372	5.9173	1.97e-07
dd_Smed_v6_2282_0_1	CPA4	Carboxypeptidase A4	CT14378	CG8560, isoform A	21.4372	Contig1315	0.784258	8.2519	0.000785548	0.759191	5.40889	0.0211091	1.11782	5.40889	0.00043265
dd_Smed_v6_229_0_1	NA	NA	NA	NA	1431.73	Contig7567	4.16819	11.8347	0.000610954	4.40992	9.40925	2.38e-26	4.30231	9.40925	2.57e-25
dd_Smed_v6_2290_0_1	HSD17B14	17-beta-hydroxysteroid dehydrogenase 14	HSD17B14	17-beta-hydroxysteroid dehydrogenase 14	153.057	Contig5582	1.30895	8.92328	0.000139649	3.27201	7.24721	5.33e-22	3.02262	7.24721	3.31e-19
dd_Smed_v6_2304_0_1	SCARB2	Lysosome membrane protein 2	scarb2	Lysosome membrane protein II	64.4644	Contig2148	2.26275	8.60287	4.64e-05	2.34846	6.74405	2.98e-16	2.33511	6.74405	4.97e-16
dd_Smed_v6_231_0_1	TBCA	Tubulin-specific chaperone A	TBCA	Tubulin-specific chaperone A	518.74	Contig249	1.74117	10.3121	0.000366714	1.32408	8.13802	1.56e-05	1.30798	8.13802	2.31e-05
dd_Smed_v6_2311_0_1	ELOVL4	Elongation of very long chain fatty acids protein 4	ELOVL4	Elongation of very long chain fatty acids protein 4	36.9746	Contig6090	2.40665	9.33475	0.00064886	2.64173	5.20341	4.15e-18	2.48775	5.20341	2.93e-16
dd_Smed_v6_2318_0_1	NA	NA	conv	Acid labile subunit	17.7471	Contig5910	1.0482	6.2591	0.00628573	4.03209	6.12493	3.9e-38	3.90498	6.12493	3.68e-36
dd_Smed_v6_2350_0_1	NA	NA	NA	NA	14.1047	PL05003B2C05	0.922752	7.073	0.00182559	1.99512	4.19476	5.35e-07	2.29897	4.19476	8.69e-09
dd_Smed_v6_2351_0_1	CYP2B6	Cytochrome P450 2B6	Cyp2b19	Cytochrome P450 2B19	9.36199	Contig1511	1.86189	9.13369	7.11e-05	2.33813	4.67198	7.67e-12	2.32031	4.67198	1.29e-11
dd_Smed_v6_2361_0_1	SLC47A1	Multidrug and toxin extrusion protein 1	slc47a1	Multidrug and toxin extrusion protein 1	31.6459	PL06018A2B12	1.30175	7.53937	0.00830667	7.04158	5.77682	7.34e-26	7.07888	5.77682	5.32e-26
dd_Smed_v6_2368_0_1	NA	NA	NA	NA	33.5055	Contig924	3.40526	9.29525	2.29e-05	2.84491	5.19702	4.61e-15	3.03878	5.19702	8.95e-17
dd_Smed_v6_2387_0_1	NCKAP1	Nck-associated protein 1	NCKAP1	Nck-associated protein 1	12.6606	Contig5865	1.52313	8.15431	0.000746504	1.70227	5.71105	1.27e-08	1.63803	5.71105	5.3e-08
dd_Smed_v6_2388_0_1	PPT1	Palmitoyl-protein thioesterase 1	PPT1	Palmitoyl-protein thioesterase 1	73.1246	Contig2665	1.96628	8.80249	4.31e-05	1.37969	6.81093	1.89e-06	1.18072	6.81093	6.06e-05
dd_Smed_v6_2391_0_1	TRAF6	TNF receptor-associated factor 6	Traf6	TNF-receptor-associated factor 2	14.1116	Contig1407	0.938036	7.655	0.000262823	1.29562	6.0109	0.000199244	1.22396	6.0109	0.000538477
dd_Smed_v6_2399_0_1	CAPZA2	F-actin-capping protein subunit alpha-2	CAPZA2	F-actin-capping protein subunit alpha-2	86.2781	Contig6139	1.14882	8.08046	0.00326467	1.71417	6.95733	8.95e-07	1.73772	6.95733	7.39e-07
dd_Smed_v6_2401_0_1	NA	NA	NA	NA	58.0682	Contig6834	1.83828	8.46473	0.00251695	3.28368	5.0261	9.22e-14	3.17589	5.0261	5.76e-13
dd_Smed_v6_241_0_1	PSAP	Prosaposin	PSAP	Prosaposin	223.632	Contig3945	4.1994	12.0977	2.6e-05	3.60112	8.45703	1.32e-16	3.81663	8.45703	3.8e-18
dd_Smed_v6_2445_0_1	GPAT4	Glycerol-3-phosphate acyltransferase 4	gpat3	Glycerol-3-phosphate acyltransferase 3	29.3809	Contig3816	0.874764	8.55766	0.000469204	1.25964	5.84317	1.07e-05	1.23287	5.84317	1.93e-05
dd_Smed_v6_2446_0_1	NA	NA	NA	NA	53.4101	Contig1700	1.35695	8.49306	0.000204286	1.5689	6.60389	5.69e-07	1.32246	6.60389	3.27e-05
dd_Smed_v6_2447_0_1	TOM1L2	TOM1-like protein 2	Tom1l2	TOM1-like protein 2	17.6691	Contig6128	0.773827	6.84629	0.00332283	1.50361	4.81167	3.79e-06	1.57242	4.81167	1.46e-06
dd_Smed_v6_245_0_1	NA	NA	NA	NA	493.657	Contig7205	3.12968	11.5626	0.000623705	3.28009	8.68821	1.15e-26	3.18278	8.68821	2.58e-25
dd_Smed_v6_2465_0_1	ARL8B	ADP-ribosylation factor-like protein 8B	ARL8B	ADP-ribosylation factor-like protein 8B	28.3422	Contig3195	0.847521	9.04941	0.000249654	1.33981	5.01105	1.3e-05	0.944631	5.01105	0.00321782
dd_Smed_v6_2467_0_1	TPD52	Tumor protein D52	TPD52	Tumor protein D52	66.5014	Contig988	0.745813	7.19342	0.00115162	1.16849	5.63683	0.000436385	0.854572	5.63683	0.0149147
dd_Smed_v6_2480_0_1	NAPB	Beta-soluble NSF attachment protein	alphaSnap	Alpha-soluble NSF attachment protein	48.591	Contig3520	0.823311	7.769	0.000560456	1.11105	6.25154	0.000240222	1.02805	6.25154	0.000848038
dd_Smed_v6_2482_0_1	TXNDC17	Thioredoxin domain-containing protein 17	cl	Clot protein	184.834	Contig1671	1.37543	9.64589	5.82e-05	1.18687	7.19009	8.27e-06	1.01078	7.19009	0.000196975
dd_Smed_v6_2489_0_1	TM2D1	TM2 domain-containing protein 1	TM2D1	TM2 domain-containing protein 1	51.8672	Contig2414	0.327164	8.30863	0.0398681	1.08557	5.09563	0.000434659	0.718117	5.09563	0.0304769
dd_Smed_v6_2494_0_1	RAB43	Ras-related protein Rab-43	RAB43	Ras-related protein Rab-43	65.0523	Contig907	1.42256	9.15185	0.000635016	2.12136	6.68698	1.08e-11	1.9796	6.68698	2.64e-10
dd_Smed_v6_2495_0_1	NA	NA	NA	NA	59.6205	Contig6009	2.25777	8.75052	0.000860213	2.64006	5.95039	1.74e-13	2.40667	5.95039	1.85e-11
dd_Smed_v6_2501_0_1	COMMD4	COMM domain-containing protein 4	Commd4	COMM domain-containing protein 4	15.3902	Contig2611	1.35833	7.99172	0.000123934	2.07258	4.11844	1.42e-09	1.97871	4.11844	8.85e-09
dd_Smed_v6_2510_0_1	AP3S2	AP-3 complex subunit sigma-2	or	Adaptor protein complex AP-3 small chain sigma3	70.7189	Contig2102	1.84687	8.07552	0.000659003	2.32564	5.7736	1.64e-11	2.38171	5.7736	6.46e-12
dd_Smed_v6_2511_0_1	NA	NA	CG43778	Uncharacterized protein, isoform D	38.9606	Contig174	2.45743	8.75586	3.93e-05	4.35557	5.18666	3.31e-28	4.27391	5.18666	2.49e-27
dd_Smed_v6_2513_0_1	SNX27	Sorting nexin-27	CG32758	LD13361p	19.8286	Contig362	1.33691	8.38024	0.0001135	1.68399	5.20717	1.09e-07	1.58911	5.20717	6.53e-07
dd_Smed_v6_2519_0_1	CCDC93	Coiled-coil domain-containing protein 93	ccdc93	Coiled-coil domain containing 93	19.8696	Contig1890	1.32969	7.99352	9.61e-05	1.43628	5.51276	1.15e-06	1.47306	5.51276	6.82e-07
dd_Smed_v6_253_0_1	ATP6V0C	V-type proton ATPase 16 kDa proteolipid subunit	atp6v0ca	V-type proton ATPase proteolipid subunit	1208.96	Contig429	2.93979	12.5909	2.29e-05	2.19484	10.1273	3.81e-13	2.05117	10.1273	1.29e-11
dd_Smed_v6_2530_0_1	SLC38A7	Putative sodium-coupled neutral amino acid transporter 7	slc38a7	Putative sodium-coupled neutral amino acid transporter 7	35.8015	Contig2706	0.432974	7.23575	0.0238866	2.28921	6.21812	5.14e-14	2.23034	6.21812	2.48e-13
dd_Smed_v6_2531_0_1	BLOC1S1	Biogenesis of lysosome-related organelles complex 1 subunit 1	Blos1	Biogenesis of lysosome-related organelles complex 1 subunit 1	42.7689	Contig7275	0.756947	8.17487	0.00929282	1.96949	4.29639	2.84e-05	1.80081	4.29639	0.000153864
dd_Smed_v6_2534_0_1	AP3D1	AP-3 complex subunit delta-1	Ap3d1	AP-3 complex subunit delta-1	85.7938	Contig3354	1.50402	8.87017	4.78e-05	1.76489	8.41573	1.83e-10	1.71815	8.41573	6.57e-10
dd_Smed_v6_2549_0_1	RUFY1	RUN and FYVE domain-containing protein 1	rufy2	RUN and FYVE domain-containing 2	33.5544	Contig2383	1.99516	8.59197	3.25e-05	1.73147	6.26542	8.92e-11	1.62817	6.26542	1.34e-09
dd_Smed_v6_2552_0_1	NA	NA	cold	Coiled, isoform A	48.1456	Contig3163	0.906022	8.79046	0.00116907	1.10726	5.97611	0.000362894	1.00924	5.97611	0.00146529
dd_Smed_v6_2559_0_1	C10orf11	Leucine-rich repeat-containing protein C10orf11	CG31274	LP05795p	25.9401	Contig2265	2.91512	9.08794	5.34e-05	7.63212	4.48885	1.16e-28	7.73817	4.48885	3.44e-29
dd_Smed_v6_2563_0_1	TWF1	Twinfilin-1	TWF1	Twinfilin-1	66.3502	Contig2453	1.77179	8.78461	7.25e-05	1.60051	6.51274	3.71e-08	1.23788	6.51274	2.92e-05
dd_Smed_v6_2564_0_1	NA	NA	NA	NA	181.708	Contig6474	1.19893	7.55047	0.00381664	3.09683	6.75825	2.56e-29	3.04198	6.75825	2.14e-28
dd_Smed_v6_2567_0_1	SOAT1	Sterol O-acyltransferase 1	SOAT1	Sterol O-acyltransferase 1	48.3909	Contig1658	0.716832	8.02291	0.00226233	3.67978	6.30521	4.12e-34	3.11689	6.30521	8.34e-26
dd_Smed_v6_2572_0_1	VPS28	Vacuolar protein sorting-associated protein 28 homolog	VPS28	Vacuolar protein sorting-associated protein 28 homolog	64.5314	Contig5241	1.01912	8.56314	0.000730948	0.761828	6.03532	0.0261186	1.09774	6.03532	0.000921677
dd_Smed_v6_2579_0_1	DNAJC13	DnaJ homolog subfamily C member 13	Dnajc13	DnaJ heat shock protein family (Hsp40) member C13	27.4014	Contig6495	1.81275	8.57436	0.000716297	2.13371	7.71201	5.64e-14	2.02044	7.71201	1.22e-12
dd_Smed_v6_2582_1_1	METTL27	Methyltransferase-like protein 27	METTL27	Methyltransferase-like protein 27	75.3112	Contig4678	2.16647	8.77858	2.92e-05	5.59679	5.7227	4.67e-47	5.18521	5.7227	6.84e-42
dd_Smed_v6_2583_0_1	DNM3	Dynamin-3	Dnm3	Dynamin-3	17.5487	Contig3030	0.437325	6.52658	0.0084686	1.33479	5.70512	1.47e-05	1.18911	5.70512	0.000143327
dd_Smed_v6_2584_0_1	NA	NA	NA	NA	23.4956	Contig3274	0.752069	6.27394	0.00266575	2.25232	3.81126	0.000788072	2.46594	3.81126	0.000268461
dd_Smed_v6_2596_0_1	SLC36A1	Proton-coupled amino acid transporter 1	CG13384	Uncharacterized protein, isoform D	96.0546	Contig7529	2.00203	9.34262	0.000849642	2.76917	6.49283	1.71e-23	2.63469	6.49283	1.71e-21
dd_Smed_v6_2599_0_1	TRAF5	TNF receptor-associated factor 5	Traf2	TNF receptor-associated factor 2	35.6923	Contig1736	2.61056	8.5035	3.74e-05	3.49252	5.72689	4.11e-31	3.36866	5.72689	2.92e-29
dd_Smed_v6_260_0_1	CFL1	Cofilin-1	tsr	Cofilin/actin-depolymerizing factor homolog	1055.79	Contig513	3.26615	11.2075	2.37e-05	2.62977	9.54785	1.37e-16	2.52069	9.54785	2.25e-15
dd_Smed_v6_2603_0_1	RAB1B	Ras-related protein Rab-1B	Rab19	RE48347p	88.4759	Contig6579	2.73832	9.11655	0.000657798	5.37555	6.148	3.74e-35	5.11641	6.148	1.28e-32
dd_Smed_v6_2604_0_1	NA	NA	NA	NA	24.4282	Contig5144	0.451702	6.98063	0.0265092	5.37109	6.58527	1.63e-62	5.37149	6.58527	2.77e-62
dd_Smed_v6_2615_1_1	NA	NA	NA	NA	9.39043	Contig3882	1.88456	8.01015	4.05e-05	5.64158	2.98024	1.28e-16	5.44083	2.98024	1.1e-15
dd_Smed_v6_2622_0_1	CNTNAP2	Contactin-associated protein-like 2	Nrx-IV	Neurexin-4	12.4185	Contig5205	0.80835	7.95131	0.00038126	1.10548	5.87867	8.59e-05	1.06208	5.87867	0.000193427
dd_Smed_v6_2623_0_1	NA	NA	CG5110	Ragulator complex protein LAMTOR3 homolog	125.862	Contig787	1.33958	8.35593	0.000186362	1.41139	6.34392	1.48e-06	1.20247	6.34392	5.48e-05
dd_Smed_v6_2631_0_1	UBE2K	Ubiquitin-conjugating enzyme E2 K	Ubc4	Ubiquitin-conjugating enzyme E2-22 kDa	33.5364	PL04006A2A10	0.827201	9.42983	0.00373759	1.25406	5.41938	0.000142345	1.15962	5.41938	0.000545403
dd_Smed_v6_2636_0_1	ARPP19	cAMP-regulated phosphoprotein 19	arpp19a	CAMP-regulated phosphoprotein 19a	18.3303	Contig233	1.73565	9.34504	0.000213517	1.7722	4.17708	7.35e-05	1.98757	4.17708	9.52e-06
dd_Smed_v6_2643_0_1	NA	NA	CG1637	Purple acid phosphatase	27.9705	Contig3574	2.84557	9.5317	3.02e-05	4.08474	5.41591	9.11e-34	3.92139	5.41591	1.48e-31
dd_Smed_v6_2654_0_1	PCDH1	Protocadherin-1	PCDH1	Protocadherin-1	15.1271	PL05003B2E03	1.52893	8.02731	0.000392681	1.28698	5.94203	1.15e-05	1.18374	5.94203	6.82e-05
dd_Smed_v6_2663_0_1	ACADVL	Very long-chain specific acyl-CoA dehydrogenase, mitochondrial	ACADVL	Very long-chain specific acyl-CoA dehydrogenase, mitochondrial	2.84494	Contig3168	0.666989	9.06668	0.0061701	1.97233	2.47267	0.000585289	2.28393	2.47267	7.21e-05
dd_Smed_v6_2669_0_1	TRAF3	TNF receptor-associated factor 3	TRAF3	TNF receptor-associated factor 3	27.0952	Contig3390	1.96811	7.73085	4.14e-05	2.31387	5.26936	1.64e-16	2.29654	5.26936	3.03e-16
dd_Smed_v6_267_0_1	CTSV	Cathepsin L2	ctsla	Cathepsin La	1391.04	Contig139	5.14684	13.4423	2.29e-05	5.77641	10.5503	2.34e-36	5.70338	10.5503	1.14e-35
dd_Smed_v6_2670_0_1	MED21	Mediator of RNA polymerase II transcription subunit 21	MED21	Mediator of RNA polymerase II transcription subunit 21	66.3024	Contig2568	1.28365	8.9068	0.000446423	1.03495	6.70246	0.00028951	0.934218	6.70246	0.00137449
dd_Smed_v6_2672_0_1	TTN	Titin	Olfr1006	Olfactory receptor	27.6357	Contig6933	1.53934	7.49167	0.00106684	1.5598	6.88637	7.96e-08	1.38434	6.88637	2.43e-06
dd_Smed_v6_2673_0_1	CNTN2	Contactin-2	Cont	Contactin	13.9534	Contig3005	0.914788	8.1574	0.000340812	1.37556	5.97725	1.97e-06	1.13583	5.97725	0.000116838
dd_Smed_v6_2681_0_1	-	cDNA FLJ46199 fis, clone TESTI4007965, highly similar to AP-1 complex subunit gamma-1	-	cDNA FLJ46199 fis, clone TESTI4007965, highly similar to AP-1 complex subunit gamma-1	40.6236	Contig6798	1.18742	9.15729	0.00191015	1.16414	7.31784	1.78e-05	0.863199	7.31784	0.00221088
dd_Smed_v6_2685_0_1	GLMP	Glycosylated lysosomal membrane protein	glmp	Glycosylated lysosomal membrane protein	60.2435	Contig3909	1.7078	7.93546	9.69e-05	2.94191	6.54547	2.38e-19	2.74659	6.54547	3.6e-17
dd_Smed_v6_2690_0_1	PLB1	Phospholipase B1, membrane-associated	Plb1	Phospholipase B1, membrane-associated	57.2108	Contig3451	3.2808	9.69528	3.32e-05	7.46295	6.38098	2.45e-35	7.24951	6.38098	6.14e-34
dd_Smed_v6_2696_0_1	ADIPOR2	Adiponectin receptor protein 2	AdipoR	Adiponectin receptor protein	58.6465	Contig5712	1.92431	10.2766	8.4e-05	1.12461	6.6151	5.21e-05	1.02237	6.6151	0.000298626
dd_Smed_v6_2699_0_1	GALC	Galactocerebrosidase	Galc	Galactocerebrosidase	67.7164	Contig1994	1.77921	9.11157	0.00125338	1.68241	7.40507	7.76e-11	1.5339	7.40507	3.81e-09
dd_Smed_v6_270_0_1	NA	NA	NA	NA	258.903	Contig731	1.84408	11.1263	3.84e-05	1.36117	8.05025	5.68e-05	1.17595	8.05025	0.000660174
dd_Smed_v6_2702_0_1	SCAMP1	Secretory carrier-associated membrane protein 1	scamp4	Secretory carrier-associated membrane protein	51.0074	Contig2266	1.21516	8.89831	7.83e-05	1.55318	6.04551	9.06e-09	1.35062	6.04551	7.83e-07
dd_Smed_v6_2703_0_1	PGS1	CDP-diacylglycerol--glycerol-3-phosphate 3-phosphatidyltransferase, mitochondrial	pgs-1	CDP-diacylglycerol--glycerol-3-phosphate 3-phosphatidyltransferase	25.8636	PL04008B1D05	1.1304	7.31244	0.00557727	2.54368	5.48746	1.84e-21	2.46976	5.48746	2.48e-20
dd_Smed_v6_271_0_1	FABP7	Fatty acid-binding protein, brain	FABP7	Fatty acid-binding protein, brain	373.783	Contig167	0.852451	10.1944	0.0149756	3.08993	7.81088	5.44e-15	2.98497	7.81088	4.24e-14
dd_Smed_v6_2710_0_1	SHB	SH2 domain-containing adapter protein B	shda	Src homology 2 domain-containing-transforming protein D, a	13.5414	PL04023B1F12	1.26706	8.61745	0.00316566	1.06993	5.11668	0.00259501	1.59314	5.11668	4.6e-06
dd_Smed_v6_2711_0_1	NIT1	Nitrilase homolog 1	nft-1	Nitrilase and fragile histidine triad fusion protein NitFhit	14.2617	Contig6008	0.595281	7.56429	0.0497684	1.04484	4.94172	0.000650527	0.950745	4.94172	0.00244082
dd_Smed_v6_2716_0_1	NKX2-2	Homeobox protein Nkx-2.2	nkx2.2a	Homeobox protein Nkx-2.2a	38.3949	Contig5669	2.17071	8.21804	3.91e-05	5.37174	6.06666	1.58e-54	5.51756	6.06666	1.15e-56
dd_Smed_v6_2719_0_1	NA	NA	NA	NA	16.3884	Contig3334	2.34386	8.41858	2.9e-05	6.6617	3.16013	7.22e-15	6.44431	3.16013	4.01e-14
dd_Smed_v6_272_0_1	NA	NA	NA	NA	88.6711	Contig65	3.28514	10.5832	2.29e-05	5.44209	6.01273	8.76e-55	5.01321	6.01273	2.45e-48
dd_Smed_v6_2731_0_1	NA	NA	kune	Kune-kune	55.3726	Contig4109	0.755642	8.25377	0.00232454	1.03704	6.14511	0.00441743	0.796622	6.14511	0.0390501
dd_Smed_v6_2732_0_1	SNX33	Sorting nexin-33	lst-4	Sorting nexin lst-4	45.1188	Contig2071	1.70643	8.7277	5.11e-05	2.37268	6.49108	3.09e-16	2.31574	6.49108	1.67e-15
dd_Smed_v6_2782_0_1	ANK3	Ankyrin-3	ank3a	Ankyrin 3a	25.2679	Contig3127	0.845794	8.29515	0.000736394	1.85258	4.52839	5.21e-09	1.47455	4.52839	4.6e-06
dd_Smed_v6_2783_0_1	HMCN1	Hemicentin-1	hmcn1	Hemicentin 1	9.55709	Contig2486	0.956303	7.78711	0.000527107	0.895301	3.99919	0.0114055	1.00524	3.99919	0.00440892
dd_Smed_v6_2790_0_1	ARL6IP1	ADP-ribosylation factor-like protein 6-interacting protein 1	arl6ip1	ADP-ribosylation factor-like 6 interacting protein	47.5553	Contig6072	0.85377	8.77434	0.006809	1.93475	6.06146	8.46e-14	1.89484	6.06146	3.1e-13
dd_Smed_v6_2791_0_1	NA	NA	NA	NA	52.6541	Contig2041	2.79623	9.29382	2.29e-05	6.02535	5.27961	2.6e-52	5.58251	5.27961	1.32e-46
dd_Smed_v6_2795_0_1	PSENEN	Gamma-secretase subunit PEN-2	pen-2	Gamma-secretase subunit pen-2	85.4908	Contig138	0.839995	9.10716	0.00155041	1.13571	6.20183	0.000553652	0.888745	6.20183	0.00977252
dd_Smed_v6_280_0_1	ODC1	Ornithine decarboxylase	odc1	Odc1 protein	266.421	Contig1882	1.26547	11.7691	0.000117859	1.4331	9.20389	1.84e-05	1.21949	9.20389	0.000352376
dd_Smed_v6_2804_0_1	GMFB	Glia maturation factor beta	Gmfb	Glia maturation factor beta	40.2292	Contig3584	0.861042	7.7219	0.00340228	1.07302	5.20143	0.00684155	0.852549	5.20143	0.041776
dd_Smed_v6_2813_0_1	CHDH	Choline dehydrogenase, mitochondrial	Chdh	Choline dehydrogenase, mitochondrial	22.4357	Contig3337	0.983805	7.30538	0.00241086	2.91111	6.30988	7.48e-20	2.98209	6.30988	1.24e-20
dd_Smed_v6_2826_0_1	OPCML	Opioid-binding protein/cell adhesion molecule	Lac	Lachesin	3.498	Contig692	0.726062	7.32089	0.0124328	2.35563	2.35534	0.000327966	1.8625	2.35534	0.00577352
dd_Smed_v6_2836_0_1	APBA1	Amyloid beta A4 precursor protein-binding family A member 1	lin-10	Protein lin-10	7.59891	Contig657	1.0796	8.20409	0.000246457	1.35203	4.16313	0.000160936	1.30165	4.16313	0.000334944
dd_Smed_v6_2839_0_1	MTCH1	Mitochondrial carrier homolog 1	mtch2	Mitochondrial carrier homolog 2	35.4571	Contig864	1.38132	9.47108	0.000226213	1.50366	5.41399	2.09e-06	1.42568	5.41399	8.33e-06
dd_Smed_v6_2840_0_1	DNAJC5B	DnaJ homolog subfamily C member 5B	Csp	DnaJ homolog subfamily C member 5 homolog	103.684	Contig2341	0.928222	7.99342	0.000292907	1.14577	6.94799	0.00101713	1.04037	6.94799	0.003604
dd_Smed_v6_2841_0_1	NA	NA	inx-1	Innexin	50.2633	Contig2	2.56939	10.1043	5.39e-05	6.26653	5.98284	1.85e-36	6.25162	5.98284	2.65e-36
dd_Smed_v6_2845_0_1	NA	NA	NA	NA	14.7428	Contig570	0.562125	7.35336	0.0271903	3.68902	3.74893	1.23e-15	3.45285	3.74893	5.49e-14
dd_Smed_v6_2871_0_1	CYP2U1	Cytochrome P450 2U1	cyp2u1	Cytochrome P450, family 2, subfamily U, polypeptide 1	22.806	Contig4815	1.63474	8.18554	5.77e-05	3.34128	5.21609	5.04e-14	3.47543	5.21609	6.97e-15
dd_Smed_v6_2879_0_1	RAB6A	RAB6A, member RAS oncogene family, isoform CRA_b	Rab17	Ras-related protein Rab-17	39.222	Contig3333	1.73594	8.04854	5.79e-05	1.4757	4.97615	4.18e-08	1.58704	4.97615	3.84e-09
dd_Smed_v6_2886_0_1	BAK1	Bcl-2 homologous antagonist/killer	zgc:153993	Zgc:153993	83.0248	Contig6675	0.799741	8.93629	0.0117253	2.05079	6.15388	8.89e-08	1.77428	6.15388	4.47e-06
dd_Smed_v6_2891_0_1	PDCD10	Programmed cell death protein 10	Ccm3	Cerebral cavernous malformation 3 ortholog	106.78	Contig3159	1.10166	9.25129	0.000368222	1.41637	7.16363	1.88e-07	1.41621	7.16363	2.21e-07
dd_Smed_v6_2892_0_1	SCP2	Non-specific lipid-transfer protein	CG17597	SD06839p	17.759	Contig5464	0.555953	7.24158	0.0169231	1.75356	4.61802	3.69e-07	2.15605	4.61802	4.28e-10
dd_Smed_v6_2906_0_1	RAB10	Ras-related protein Rab-10	Rab10	LD39986p	48.5253	Contig985	1.8169	8.60754	5.57e-05	3.923	5.38319	1.21e-27	3.6639	5.38319	1.07e-24
dd_Smed_v6_2914_0_1	ROCK1	Rho-associated protein kinase 1	rock1	Rho-associated protein kinase	31.23	Contig5319	1.36439	7.62771	0.000144835	1.70954	7.01348	1.51e-07	1.72595	7.01348	1.34e-07
dd_Smed_v6_2915_0_1	RAB7L1	RAB7, member RAS oncogene family-like 1	Rab29	Ras-related protein Rab-7L1	36.6748	Contig2676	1.71159	8.32613	0.000129179	1.47047	5.3073	3.73e-05	1.40586	5.3073	9.63e-05
dd_Smed_v6_2918_0_1	SPNS1	Protein spinster homolog 1	SPNS1	Protein spinster homolog 1	20.93	Contig7004	2.0431	8.76866	0.00134773	3.45539	5.13921	2.86e-13	3.37948	5.13921	9.72e-13
dd_Smed_v6_2929_0_1	GLIPR2	Golgi-associated plant pathogenesis-related protein 1	Glipr2	Golgi-associated plant pathogenesis-related protein 1	28.6113	Contig1497	3.00467	9.46132	2.39e-05	2.01951	4.7416	7.48e-12	-0.112363	4.7416	0.813761
dd_Smed_v6_2976_0_1	NA	NA	vma21	Vacuolar ATPase assembly integral membrane protein vma21	70.8894	Contig23	0.464768	8.73245	0.0359292	1.31029	5.32251	0.000903131	1.33053	5.32251	0.000849297
dd_Smed_v6_2991_0_1	RAB5A	Ras-related protein Rab-5A	rab-5	RAB family	9.78971	Contig1027	0.734666	9.42861	0.000547359	1.19749	4.86887	0.00184654	1.21629	4.86887	0.00176533
dd_Smed_v6_2996_0_1	RIN2	Ras and Rab interactor 2	spri	Protein sprint	4.68115	PL04015A2B09	0.696978	6.42771	0.00779143	1.53452	3.96481	6.51e-05	1.38057	3.96481	0.000409836
dd_Smed_v6_3_0_1	PS1TP5BP1	HCG15971, isoform CRA_a	act-2	Actin-2	6001.42	Contig1138	3.30363	14.0502	2.58e-05	2.34466	13.2359	3.07e-11	2.25047	13.2359	2.05e-10
dd_Smed_v6_3005_0_1	ADD3	Gamma-adducin	Add3	Gamma-adducin	15.3758	Contig5036	1.01654	8.11034	0.000667055	1.51429	4.73295	9.97e-07	1.57452	4.73295	4.03e-07
dd_Smed_v6_3019_0_1	SCCPDH	Saccharopine dehydrogenase-like oxidoreductase	CG2604	AT14148p	51.9473	Contig6372	0.994721	9.19861	0.00416084	2.12748	6.2485	4.14e-13	1.92516	6.2485	6.05e-11
dd_Smed_v6_3032_0_1	HAAO	3-hydroxyanthranilate 3,4-dioxygenase	Haao	3-hydroxyanthranilate 3,4-dioxygenase	73.6981	Contig6000	1.36319	7.35826	0.00161243	6.47322	6.07274	3.71e-53	6.35869	6.07274	9e-52
dd_Smed_v6_3038_0_1	TRAF6	TNF receptor-associated factor 6	TRAF6	TNF receptor-associated factor 6	105.88	Contig1922	1.85153	7.63583	0.0005132	2.28913	7.35248	3.93e-16	2.16356	7.35248	1.49e-14
dd_Smed_v6_3050_0_1	CAB39L	Calcium-binding protein 39-like	cab39l	Calcium binding protein 39-like	19.2746	Contig3526	0.677838	7.86138	0.00942595	1.2523	5.02714	7.43e-06	1.21011	5.02714	1.77e-05
dd_Smed_v6_3051_0_1	NA	NA	NA	NA	10.9671	Contig2047	2.43079	8.15848	0.000181328	3.3968	4.25213	7.78e-20	3.26115	4.25213	1.77e-18
dd_Smed_v6_3066_0_1	TMEM41A	Transmembrane protein 41A	tmem41aa	Transmembrane protein 41A-A	95.5664	Contig4544	1.83346	9.02492	0.000562975	4.17175	6.47835	1.06e-38	3.94469	6.47835	2.44e-35
dd_Smed_v6_3070_0_1	CD109	CD109 antigen	Mcr	LD23292p	15.8479	Contig3726	1.01802	9.59036	0.000328484	1.20758	6.55674	1.68e-05	0.764337	6.55674	0.0105061
dd_Smed_v6_3071_0_1	CLCN7	H(+)/Cl(-) exchange transporter 7	Clcn7	H(+)/Cl(-) exchange transporter 7	9.47458	Contig70	2.28947	8.39781	2.29e-05	3.00339	4.55331	9.69e-17	3.13233	4.55331	6.33e-18
dd_Smed_v6_3076_0_1	NA	NA	NA	NA	21.7586	Contig3355	2.41165	8.40046	2.97e-05	3.09836	4.41507	2.11e-17	2.95377	4.41507	5.34e-16
dd_Smed_v6_309_0_1	NA	NA	NA	NA	614.608	Contig260	1.78908	9.20531	0.000162171	1.08561	9.34307	0.000614992	1.19676	9.34307	0.000163489
dd_Smed_v6_3096_0_1	CMTM8	CKLF-like MARVEL transmembrane domain-containing protein 8	NA	NA	10.1688	Contig2990	0.847836	8.97613	0.000358733	2.15749	3.3006	6.21e-07	2.20303	3.3006	4.13e-07
dd_Smed_v6_3097_0_1	TRAF5	TNF receptor-associated factor 5	TRAF5	TNF receptor-associated factor 5	40.1137	PL06023A1F09	0.389049	6.44993	0.0316421	6.02582	6.22977	7.04e-55	5.87394	6.22977	8.23e-53
dd_Smed_v6_3125_0_1	CLN5	Ceroid-lipofuscinosis neuronal protein 5	Cln5	Ceroid-lipofuscinosis neuronal protein 5 homolog	68.6375	Contig2216	3.09375	9.32094	2.67e-05	6.47803	6.05236	3.42e-50	6.62949	6.05236	7.74e-52
dd_Smed_v6_3132_0_1	NA	NA	NA	NA	11.7186	Contig5000	1.09295	7.98004	0.000313658	2.14483	4.0719	1.06e-06	2.11776	4.0719	1.69e-06
dd_Smed_v6_3137_0_1	CERS1	Ceramide synthase 1	cers1	Ceramide synthase 1	40.0982	Contig2269	0.648924	8.45857	0.00375035	1.93334	6.2083	1.36e-11	1.91704	6.2083	2.36e-11
dd_Smed_v6_3145_0_1	NA	NA	NA	NA	15.4122	Contig1623	0.863359	7.37403	0.000358757	1.31447	4.04097	0.000179239	1.05582	4.04097	0.0036607
dd_Smed_v6_3148_0_1	EHD1	EH domain-containing protein 1	rme-1	Receptor Mediated Endocytosis	96.2821	Contig4857	1.76129	8.22725	6.09e-05	1.97179	7.67244	2.73e-10	2.04514	7.67244	6.97e-11
dd_Smed_v6_3157_0_1	COMMD2	COMM domain-containing protein 2	commd2	COMM domain containing 2	39.1003	Contig2201	1.14441	7.9015	0.00105756	1.57699	5.14583	1.88e-07	1.35785	5.14583	9.52e-06
dd_Smed_v6_3160_0_1	ACADS	Short-chain specific acyl-CoA dehydrogenase, mitochondrial	zgc:85777	Zgc:85777	29.0615	Contig4610	1.18869	8.20151	0.000134454	2.29755	5.33654	5.1e-10	2.36114	5.33654	2.02e-10
dd_Smed_v6_3164_0_1	RAB14	Ras-related protein Rab-14	rab14	RAB14, member RAS oncogene family	18.2006	Contig3296	0.91047	9.58904	0.000665505	1.46955	4.77532	3.55e-06	1.10432	4.77532	0.000712639
dd_Smed_v6_3165_0_1	ABHD4	Protein ABHD4	ABHD4	Protein ABHD4	42.5659	Contig5428	1.45946	7.54322	0.000180531	1.91227	5.88821	1.22e-12	2.02061	5.88821	7.1e-14
dd_Smed_v6_3174_0_1	MLST8	Target of rapamycin complex subunit LST8	mlst8	Target of rapamycin complex subunit lst8	8.7346	Contig1647	0.551658	7.85809	0.00500507	1.82199	3.47135	0.000734677	1.44405	3.47135	0.00996048
dd_Smed_v6_3179_0_1	OSBPL2	Oxysterol-binding protein-related protein 2	Osbpl2	Oxysterol-binding protein-related protein 2	42.7957	Contig7473	1.74017	8.00935	0.00128285	1.92322	6.21156	2.69e-12	1.87025	6.21156	1.24e-11
dd_Smed_v6_3195_0_1	NA	NA	NA	NA	12.1627	PL05003A1B03	1.07523	6.6216	0.00213326	1.03042	5.66959	6.77e-05	0.746816	5.66959	0.00593487
dd_Smed_v6_32_0_1	NA	NA	cnfn	Cornifelin homolog	6574.46	Contig3429	3.70015	13.649	2.29e-05	3.69546	11.8691	4.08e-29	3.60861	11.8691	5.76e-28
dd_Smed_v6_3200_0_1	NA	NA	NA	NA	52.7463	Contig3280	1.68879	8.27143	0.000122228	2.47107	5.40113	3.14e-18	1.90741	5.40113	1.68e-11
dd_Smed_v6_3208_0_1	CLIC4	Chloride intracellular channel protein 4	Clic	Chloride intracellular channel, isoform A	41.1359	Contig3691	2.06945	8.20385	8.54e-05	3.99001	5.30463	2.38e-28	3.97832	5.30463	3.56e-28
dd_Smed_v6_3209_0_1	MANBA	Beta-mannosidase	Manba	Beta-mannosidase	9.93582	PL06005A1E03	0.339658	6.37036	0.0412143	2.93479	4.94239	5.15e-23	2.6611	4.94239	2.32e-19
dd_Smed_v6_3212_0_1	EFR3B	Protein EFR3 homolog B	EFR3B	Protein EFR3 homolog B	5.00088	PL05006A2G12	0.560726	6.55029	0.0225922	1.18009	4.0536	0.00294586	1.22634	4.0536	0.00220155
dd_Smed_v6_3236_0_1	SLC30A3	Zinc transporter 3	slc30a8	Solute carrier family 30 (zinc transporter), member 8	19.9072	Contig3522	1.14338	7.48152	0.00115356	1.63563	4.85348	2.93e-07	1.28167	4.85348	8.14e-05
dd_Smed_v6_324_0_1	NA	NA	NA	NA	288.676	Contig819	3.13504	9.67015	2.53e-05	5.91773	8.7609	5.13e-67	5.78728	8.7609	1.03e-64
dd_Smed_v6_3252_0_1	SLC16A12	Monocarboxylate transporter 12	SLC16A12	Monocarboxylate transporter 12	22.3339	Contig4237	2.37556	9.34325	2.33e-05	3.37344	4.99863	1.63e-22	3.33956	4.99863	4.39e-22
dd_Smed_v6_3254_1_1	NA	NA	NA	NA	183.365	Contig112	1.34858	8.25248	0.0012623	3.19932	6.70321	9.76e-28	3.34552	6.70321	7.39e-30
dd_Smed_v6_3267_0_1	RAB10	Ras-related protein Rab-10	rab10	RAB10, member RAS oncogene family	17.124	Contig2183	0.485865	7.58271	0.0154288	0.691572	3.65917	0.210903	1.39946	3.65917	0.0055844
dd_Smed_v6_3268_0_1	OSBP2	Oxysterol-binding protein 2	OSBP2	Oxysterol-binding protein 2	6.98582	Contig4553	0.886488	7.50527	0.00140683	1.53029	4.83998	8.61e-06	1.5352	4.83998	9.23e-06
dd_Smed_v6_3270_0_1	ACOX3	Peroxisomal acyl-coenzyme A oxidase 3	Acox3	Peroxisomal acyl-coenzyme A oxidase 3	5.92642	Contig4735	0.744245	8.05646	0.00575974	1.61866	3.70708	0.000224783	1.41511	3.70708	0.00161168
dd_Smed_v6_3273_0_1	EPG5	Ectopic P granules protein 5 homolog	Epg5	Ectopic P granules protein 5 homolog	5.76635	Contig4471	1.07729	7.58399	0.00104291	1.08092	5.60815	0.000650493	0.922855	5.60815	0.0048133
dd_Smed_v6_3277_0_1	ANK1	Ankyrin-1	ANK1	Ankyrin-1	23.3501	Contig1190	1.51573	7.09942	0.000411435	2.07436	6.17319	6e-09	1.88872	6.17319	1.42e-07
dd_Smed_v6_329_0_1	CTSD	Cathepsin D	cathD	CathD	710.643	Contig337	3.54421	11.8981	2.29e-05	3.13978	9.87446	5.2e-22	2.91325	9.87446	2.41e-19
dd_Smed_v6_3309_0_1	-	cDNA FLJ77654, highly similar to Homo sapiens guanine nucleotide binding protein (G protein), beta polypeptide 4 (GNB4), mRNA	gpb-1	Guanine nucleotide-binding protein subunit beta-1	6.76754	Contig3938	1.28548	8.93058	7.81e-05	2.60121	3.55231	3.2e-11	2.20472	3.55231	2.02e-08
dd_Smed_v6_3344_0_1	TMEM189	Transmembrane protein 189	TMEM189	Transmembrane protein 189	37.0058	Contig6417	0.795223	8.03022	0.0199071	1.05098	6.01526	0.000314839	1.12944	6.01526	0.000113665
dd_Smed_v6_335_0_1	CS	Citrate synthase, mitochondrial	cs	Citrate synthase, mitochondrial	732.736	Contig507	1.4221	11.7094	0.000108834	1.78072	10.7563	9.56e-08	1.72031	10.7563	3.05e-07
dd_Smed_v6_3361_0_1	PAK1	Serine/threonine-protein kinase PAK 1	pak1	P21 protein (Cdc42/Rac)-activated kinase 1	27.8622	Contig1629	1.08189	8.12452	0.00445952	2.54072	5.82852	5.67e-19	2.08181	5.82852	2.52e-13
dd_Smed_v6_3362_0_1	RAC1	Ras-related C3 botulinum toxin substrate 1	Rac1	Ras-related C3 botulinum toxin substrate 1	104.927	Contig2853	2.39458	11.088	5.33e-05	6.64602	6.29195	4.54e-78	6.64101	6.29195	4.31e-78
dd_Smed_v6_3369_0_1	WASHC5	WASH complex subunit 5	washc5	WASH complex subunit 5	15.2241	Contig372	1.65572	8.09278	3.95e-05	2.8201	5.77401	8.79e-20	2.38545	5.77401	9.29e-15
dd_Smed_v6_3370_0_1	RAB7A	Ras-related protein Rab-7a	Rab7	CG5915 protein	12.1821	Contig1543	1.2667	7.22332	0.00437586	1.92531	3.69074	1.9e-06	1.56289	3.69074	0.00014209
dd_Smed_v6_3371_0_1	HSD17B12	Very-long-chain 3-oxoacyl-CoA reductase	HSD17B12	Very-long-chain 3-oxoacyl-CoA reductase	24.1944	Contig6399	0.875079	8.6346	0.00271784	1.48084	4.84953	5.14e-05	1.47812	4.84953	6.12e-05
dd_Smed_v6_3373_0_1	PCYT2	Ethanolamine-phosphate cytidylyltransferase	Pect	Phosphoethanolamine cytidylyltransferase, isoform C	25.5025	Contig4909	1.32428	8.00706	0.00028636	1.55578	5.04824	5.23e-06	1.55929	5.04824	5.68e-06
dd_Smed_v6_3376_0_1	BPGAP1	BCH domain-containing Cdc42GAP-like protein	BPGAP1	BCH domain-containing Cdc42GAP-like protein	25.9675	Contig2140	1.17127	7.79482	0.000266655	1.34763	5.53429	2.6e-06	1.42838	5.53429	6.82e-07
dd_Smed_v6_3397_0_1	NA	NA	CG7222	CG7222, isoform A	26.5952	Contig6898	0.981006	7.48843	0.0208477	1.09079	5.09661	0.00118782	0.749273	5.09661	0.0382327
dd_Smed_v6_3398_0_1	WDFY3	WD repeat and FYVE domain-containing protein 3	Wdfy3	WD repeat and FYVE domain-containing protein 3	6.2178	Contig1351	0.962596	7.23332	0.000566652	1.1506	6.31689	0.000145448	1.13149	6.31689	0.000220907
dd_Smed_v6_3405_0_1	NA	NA	NA	NA	57.4178	Contig1611	2.14744	8.89565	3.77e-05	2.19789	5.84343	3.09e-11	2.03008	5.84343	9.87e-10
dd_Smed_v6_3416_0_1	MIB1	E3 ubiquitin-protein ligase MIB1	mib1	E3 ubiquitin-protein ligase mib1	26.6155	Contig4150	0.347721	6.85314	0.0312899	1.73343	5.60602	1.46e-06	1.38663	5.60602	0.000154276
dd_Smed_v6_3432_0_1	SCUBE1	Signal peptide, CUB and EGF-like domain-containing protein 1	SCUBE1	Signal peptide, CUB and EGF-like domain-containing protein 1	10.7083	Contig2223	1.13172	7.38249	0.00393841	2.11821	3.50238	0.000352086	2.06032	3.50238	0.000594261
dd_Smed_v6_3440_0_1	NA	NA	NA	NA	3.34139	Contig948	0.48302	7.99079	0.0141899	1.28466	3.14379	0.00367772	1.24389	3.14379	0.00573333
dd_Smed_v6_3443_0_1	ZFP37	Zinc finger protein 37 homolog	znf408	Zinc finger protein 408	12.4375	Contig1854	0.812507	9.355	0.00304714	1.72938	4.34007	2.05e-07	1.99635	4.34007	2.11e-09
dd_Smed_v6_3484_0_1	MPPED1	Metallophosphoesterase domain-containing protein 1	MPPED1	Metallophosphoesterase domain-containing protein 1	14.5175	Contig3655	0.800183	7.67254	0.00148411	0.902159	4.94023	0.00379524	1.16771	4.94023	0.000137143
dd_Smed_v6_3507_0_1	PRELID1	PRELI domain-containing protein 1, mitochondrial	Prelid1	PRELI domain-containing protein 1, mitochondrial	34.8131	Contig1324	0.710402	7.41701	0.00513414	1.08238	5.31449	0.000589405	1.02858	5.31449	0.00132043
dd_Smed_v6_3508_0_1	SLC28A3	Solute carrier family 28 member 3	Slc28a3	Solute carrier family 28 member 3	31.8687	Contig3413	2.73974	8.6929	2.61e-05	5.36191	5.99382	8.4e-41	4.94457	5.99382	4.61e-36
dd_Smed_v6_3520_0_1	DSCR3	Down syndrome critical region protein 3	Dscr3	Down syndrome critical region protein 3 homolog	33.2108	Contig960	0.836322	8.80952	0.00137378	1.25897	5.35709	5.68e-05	1.18794	5.35709	0.000176059
dd_Smed_v6_354_0_1	TSPAN3	Tetraspanin-3	Tspan3	Tetraspanin-3	2946.93	Contig2538	3.22906	10.6912	0.00010358	5.34816	11.3937	9.52e-45	5.18253	11.3937	1.13e-42
dd_Smed_v6_3560_0_1	DDO	D-aspartate oxidase	CG11236	GH12548p	107.704	Contig2251	1.23638	7.71476	0.000961763	4.38029	6.80606	1.07e-25	4.5197	6.80606	6.28e-27
dd_Smed_v6_3562_0_1	TRAF6	TNF receptor-associated factor 6	traf3	TNF receptor-associated factor 3	12.7234	Contig4866	1.62646	7.58137	0.000118251	1.98379	4.35592	1.38e-07	2.21658	4.35592	4.48e-09
dd_Smed_v6_3575_0_1	RBMS1	RNA-binding motif, single-stranded-interacting protein 1	elav	Protein elav	18.7941	Contig4307	1.67036	8.09422	0.00011543	2.21113	4.46434	5.96e-15	1.93947	4.46434	8.52e-12
dd_Smed_v6_3578_0_1	SLC15A4	Solute carrier family 15 member 4	SLC15A4	Solute carrier family 15 member 4	7.72204	Contig1439	2.353	7.66251	0.000163308	7.39823	3.59028	7.41e-21	7.28528	3.59028	2.38e-20
dd_Smed_v6_3592_0_1	PLA2G15	Group XV phospholipase A2	PLA2G15	Group XV phospholipase A2	17.9707	Contig1798	2.43077	8.5824	3.61e-05	3.5615	4.64772	8.46e-23	3.36352	4.64772	1.13e-20
dd_Smed_v6_3596_0_1	SLC25A11	Mitochondrial 2-oxoglutarate/malate carrier protein	misc-1	MItochondrial Solute Carrier	9.42449	Contig2532	0.506023	7.91071	0.0100815	1.66384	3.51301	0.00116415	1.52758	3.51301	0.00352328
dd_Smed_v6_3602_0_1	APMAP	Adipocyte plasma membrane-associated protein	apmap	Adipocyte plasma membrane-associated protein	19.4286	Contig2304	1.00774	8.37017	0.00720289	3.88378	4.60169	5.01e-09	3.82703	4.60169	9.43e-09
dd_Smed_v6_3604_0_1	MIB1	E3 ubiquitin-protein ligase MIB1	MIB1	E3 ubiquitin-protein ligase MIB1	15.8144	Contig4146	1.42003	7.10973	0.00516757	1.94752	4.62211	2.6e-08	1.71991	4.62211	1.09e-06
dd_Smed_v6_3611_0_1	ABCD1	ATP-binding cassette sub-family D member 1	ABCD1	ATP-binding cassette sub-family D member 1	25.0756	Contig2577	1.76058	7.9434	6.06e-05	2.25984	5.85896	3.09e-18	1.98175	5.85896	2.18e-14
dd_Smed_v6_3616_0_1	MCOLN2	Mucolipin-2	Trpml	SD02261p	18.156	PL06014B2E11	0.644961	6.85249	0.00696577	2.86827	5.37219	1.76e-20	2.902	5.37219	7.54e-21
dd_Smed_v6_3632_0_1	TNXB	Tenascin-X	Tnx	Tenascin-X	400.547	Contig505	3.90745	11.7722	4.9e-05	5.65803	8.55818	2e-53	5.36545	8.55818	2.1e-49
dd_Smed_v6_3638_0_1	KLF13	Krueppel-like factor 13	cbt	Cabut, isoform B	10.3192	Contig3093	0.41776	8.47344	0.0317406	2.18316	4.10063	3.86e-07	2.01296	4.10063	3.39e-06
dd_Smed_v6_3650_0_1	TRAF5	TNF receptor-associated factor 5	TRAF5	TNF receptor-associated factor 5	53.0459	Contig407	1.82055	8.52064	3.8e-05	2.49156	6.18975	1.59e-20	2.3135	6.18975	5.86e-18
dd_Smed_v6_366_0_1	PGD	6-phosphogluconate dehydrogenase, decarboxylating	PGD	6-phosphogluconate dehydrogenase, decarboxylating	129.676	Contig1749	1.59772	11.6765	0.000149482	2.23396	8.04867	4.6e-10	2.07877	8.04867	7.67e-09
dd_Smed_v6_3667_0_1	MST4	Serine/threonine protein kinase MST4	MST4	Serine/threonine protein kinase MST4	46.0286	Contig4602	0.735136	8.76252	0.00892205	1.59872	6.89196	7.66e-08	1.38846	6.89196	3.94e-06
dd_Smed_v6_3673_0_1	AGMO	Alkylglycerol monooxygenase	Agmo	Alkylglycerol monooxygenase	155.722	Contig4154	2.68188	9.08241	2.76e-05	3.88192	7.87452	5.58e-40	3.81615	7.87452	7.47e-39
dd_Smed_v6_3689_0_1	NA	NA	NA	NA	95.85	Contig3663	2.81957	9.22364	2.29e-05	6.3573	6.89822	9.83e-65	6.20946	6.89822	2.16e-62
dd_Smed_v6_3706_0_1	TRAF3	TNF receptor-associated factor 3	TRAF3	TNF receptor-associated factor 3	30.9992	Contig52	0.680472	7.15845	0.01071	1.17197	5.81654	0.000168542	0.98115	5.81654	0.0022426
dd_Smed_v6_3711_0_1	PRKACB	cAMP-dependent protein kinase catalytic subunit beta	Prkacb	cAMP-dependent protein kinase catalytic subunit beta	25.2067	Contig892	1.4153	8.41289	0.00197097	6.25488	4.90196	5.13e-55	6.22882	4.90196	1.33e-54
dd_Smed_v6_3712_0_1	SQSTM1	Sequestosome-1	Dytn	Dystrotelin	26.2338	PL030015A10F05	1.70886	8.07752	0.00126701	1.59631	5.19224	1.46e-06	1.61132	5.19224	1.33e-06
dd_Smed_v6_3727_0_1	NA	NA	NA	NA	36.0804	Contig3262	1.14656	8.68671	0.000297149	1.59981	5.35867	1.2e-07	1.59994	5.35867	1.39e-07
dd_Smed_v6_3737_0_1	ARHGAP25	Rho GTPase-activating protein 25	Plekhd1	Pleckstrin homology domain-containing family D member 1	16.3795	PL06022B2B05	0.424986	6.39018	0.020166	1.42177	4.85577	3.19e-06	0.950816	4.85577	0.00289399
dd_Smed_v6_3738_0_1	NA	NA	NA	NA	16.4461	PL05001B2A12	0.474327	7.53434	0.0390757	1.05587	4.14246	0.00809271	0.954119	4.14246	0.0205304
dd_Smed_v6_3754_0_1	ELMO2	Engulfment and cell motility protein 2	ELMO2	Engulfment and cell motility protein 2	16.5951	Contig1935	1.13204	7.70939	0.000257318	1.10134	5.54931	0.00015658	1.18934	5.54931	4.68e-05
dd_Smed_v6_3794_0_1	PANK1	Pantothenate kinase 1	fbl	Fumble, isoform F	46.9944	Contig5175	2.23037	8.17955	5.98e-05	6.07571	5.67945	1.91e-44	5.81884	5.67945	1.11e-41
dd_Smed_v6_3795_0_1	NA	NA	NA	NA	27.2389	Contig5226	0.430993	6.54435	0.0101504	2.13328	5.60716	7.05e-12	2.02951	5.60716	7.94e-11
dd_Smed_v6_3804_0_1	ACOX3	Peroxisomal acyl-coenzyme A oxidase 3	acox3	Acyl-coenzyme A oxidase	10.9857	Contig905	1.59734	8.69411	0.000239303	2.59904	4.58872	5.03e-09	2.56414	4.58872	9.43e-09
dd_Smed_v6_3811_0_1	NA	NA	NA	NA	24.0394	Contig2840	0.644241	8.94991	0.0163313	1.37415	5.23909	9.53e-07	1.25065	5.23909	1.04e-05
dd_Smed_v6_3817_0_1	DDX3Y	ATP-dependent RNA helicase DDX3Y	ddx3a	DEAD (Asp-Glu-Ala-Asp) box helicase 3a	15.5446	Contig4698	0.953881	8.14483	0.000528511	1.28497	5.11051	1.98e-05	1.11035	5.11051	0.000298728
dd_Smed_v6_3820_0_1	NA	NA	NA	NA	29.8141	Contig195	0.885107	6.92587	0.00196403	1.38868	6.28636	9e-06	1.25532	6.28636	7.53e-05
dd_Smed_v6_3821_0_1	SLC2A4RG	SLC2A4 regulator	Glut4EF	Glut4EF, isoform G	36.7097	Contig3306	2.78908	8.15807	3.98e-05	4.09929	5.80063	4.05e-34	4.15679	5.80063	7.3e-35
dd_Smed_v6_3824_0_1	SERPINB13	Serpin B13	Serpinb3a	Serine (Or cysteine) peptidase inhibitor, clade B (Ovalbumin), member 3A	68.4046	Contig6228	0.870433	8.82863	0.0280488	1.07394	6.56819	0.000247214	0.806388	6.56819	0.00874986
dd_Smed_v6_3825_1_1	NA	NA	NA	NA	11.4689	Contig2424	0.843242	7.9139	0.000931478	1.04414	5.07562	0.00124475	1.01585	5.07562	0.00199729
dd_Smed_v6_3838_0_1	PRKX	cAMP-dependent protein kinase catalytic subunit PRKX	PRKX	cAMP-dependent protein kinase catalytic subunit PRKX	27.719	Contig6448	1.24158	8.7418	0.000862276	1.48891	5.25114	4.13e-05	1.15224	5.25114	0.00213527
dd_Smed_v6_3874_0_1	SLC30A1	Zinc transporter 1	SLC30A1	Zinc transporter 1	7.5792	Contig4558	0.550147	8.16284	0.00394013	1.4043	3.71354	0.000403151	1.26893	3.71354	0.00174886
dd_Smed_v6_388_0_1	DNM1L	Dynamin-1-like protein	DNM1L	Dynamin-1-like protein	100.949	Contig6476	3.0519	9.48558	0.00182368	2.37389	8.01078	1.86e-09	2.22357	8.01078	2.08e-08
dd_Smed_v6_3889_0_1	RAB4B	Ras-related protein Rab-4B	Rab10	LD39986p	29.3202	Contig3665	2.09548	9.20143	5.89e-05	2.47847	4.80438	1.5e-14	2.56677	4.80438	2.12e-15
dd_Smed_v6_390_0_1	PSAP	Prosaposin	PSAP	Prosaposin	12.8767	Contig332	1.27978	6.82418	0.000337725	1.84271	3.78836	3.88e-06	2.5358	3.78836	2.2e-10
dd_Smed_v6_3903_0_1	ADA	Adenosine deaminase	ada	Adenosine deaminase	26.6435	Contig7357	1.89274	8.35334	0.00068152	2.30415	5.04972	6.07e-13	2.15873	5.04972	1.7e-11
dd_Smed_v6_391_0_1	NA	NA	NA	NA	3124.78	Contig3732	3.09008	11.7935	2.29e-05	3.35331	10.2229	1.73e-24	3.39363	10.2229	6.06e-25
dd_Smed_v6_3922_0_1	ARHGAP44	Rho GTPase-activating protein 44	ARHGAP44	Rho GTPase-activating protein 44	13.4227	PL05005B2G08	1.03597	7.96983	0.00192594	0.926213	4.87601	0.00395491	1.12119	4.87601	0.000421621
dd_Smed_v6_3925_0_1	DTNBP1	Dysbindin	Dysb	Dysbindin protein homolog	7.16113	PL04018A1A03	1.63187	8.29807	0.000686946	1.97732	2.71791	0.00983457	2.12643	2.71791	0.00596189
dd_Smed_v6_3933_1_1	NA	NA	NA	NA	23.5749	Contig5292	0.740547	7.88361	0.000761111	1.99896	3.67261	9.82e-05	1.26354	3.67261	0.0202439
dd_Smed_v6_3945_0_1	NA	NA	NA	NA	25.0854	Contig1674	1.14404	7.04771	0.00019125	3.45895	4.13653	6.64e-16	3.35424	4.13653	4.57e-15
dd_Smed_v6_3947_0_1	MTRR	Methionine synthase reductase	Mtrr	Methionine synthase reductase	29.7754	PL05004A2F08	0.542489	7.59215	0.0173063	1.49351	6.14786	1.83e-07	1.54941	6.14786	7.01e-08
dd_Smed_v6_3949_0_1	ZNF547	Trafficking protein particle complex 2, isoform CRA_a	ZNF547	Trafficking protein particle complex 2, isoform CRA_a	32.1807	Contig1877	0.586423	6.8274	0.0145315	0.966047	4.38126	0.00936254	1.07341	4.38126	0.00389591
dd_Smed_v6_3959_0_1	PFKFB1	6-phosphofructo-2-kinase/fructose-2,6-bisphosphatase 1	pfkfb1	6-phosphofructo-2-kinase/fructose-2,6-biphosphatase 1	10.3999	Contig4668	0.64985	7.53366	0.00142608	1.83692	4.24033	5.7e-08	1.66875	4.24033	1e-06
dd_Smed_v6_396_0_1	PSAP	Prosaposin	PSAP	Prosaposin	16.1595	Contig4121	2.77604	8.1274	0.000273669	5.38395	3.68351	1.76e-18	5.17055	3.68351	2.43e-17
dd_Smed_v6_3969_0_1	VPS33A	Vacuolar protein sorting-associated protein 33A	vps33a	Vacuolar protein sorting 33A	10.1811	Contig4757	0.358463	6.73333	0.0199005	1.31977	4.43504	1.27e-05	1.21039	4.43504	7.76e-05
dd_Smed_v6_3982_0_1	ABCC1	Multidrug resistance-associated protein 1	Abcc1	Multidrug resistance-associated protein 1	8.39256	Contig6219	2.06235	7.73946	0.000975457	5.95201	5.20279	3.79e-16	6.20766	5.20279	4.6e-17
dd_Smed_v6_3983_0_1	MSRA	Mitochondrial peptide methionine sulfoxide reductase	Msra	Mitochondrial peptide methionine sulfoxide reductase	19.417	Contig2001	0.458294	6.78094	0.0115529	1.88527	4.39344	6.08e-07	1.91064	4.39344	4.95e-07
dd_Smed_v6_3999_0_1	INPP4B	Type II inositol 3,4-bisphosphate 4-phosphatase	Inpp4b	Inositol polyphosphate 4-phosphatase type II alpha isoform	7.259	Contig3086	0.890505	6.81717	0.00623755	2.14049	4.49063	7.55e-13	1.77352	4.49063	3.49e-09
dd_Smed_v6_400_0_1	ALDH2	Aldehyde dehydrogenase, mitochondrial	Aldh2	Aldehyde dehydrogenase, mitochondrial	402.573	Contig1973	0.0174598	9.84419	0.0176045	2.6129	9.4211	1.34e-16	2.42213	9.4211	1.62e-14
dd_Smed_v6_4003_0_1	NUCB1	Nucleobindin-1	nucb1	Nucleobindin 1	17.3407	Contig2769	0.724942	7.41808	0.00324731	2.47216	4.67572	3.63e-16	1.94944	4.67572	1.31e-10
dd_Smed_v6_4008_0_1	PCYT1B	Choline-phosphate cytidylyltransferase B	Pcyt2	CTP:phosphocholine cytidylyltransferase 2	10.8138	Contig1692	0.735031	6.87958	0.000824224	1.02556	3.83397	0.00837631	0.66878	3.83397	0.118436
dd_Smed_v6_402_1_1	NA	NA	NA	NA	182.802	Contig370	1.25845	10.1277	0.00111226	1.80241	7.65165	1.67e-08	2.00266	7.65165	4.17e-10
dd_Smed_v6_4043_0_1	EXOC8	Exocyst complex component 8	exoc8	Exocyst complex component 8	6.81329	Contig3995	0.890102	8.09	0.00100689	1.07322	4.06606	0.00165605	1.21129	4.06606	0.000372562
dd_Smed_v6_4056_0_1	GLB1	Beta-galactosidase	Glb1	Beta-galactosidase	50.7824	Contig6905	2.38316	9.25414	0.000849879	2.34483	6.76605	7.83e-19	2.10394	6.76605	1.71e-15
dd_Smed_v6_4076_1_1	CLCN3	H(+)/Cl(-) exchange transporter 3	ClC-c	Chloride channel protein	11.512	PL05003A2G04	1.14804	8.26605	0.000899574	1.82244	5.21063	1.07e-08	1.65151	5.21063	2.74e-07
dd_Smed_v6_4081_0_1	ABCG2	ATP-binding cassette sub-family G member 2	w	Protein white	39.2067	Contig7488	1.6463	8.05705	0.00391447	5.47938	6.27934	3.46e-64	5.2609	6.27934	2.89e-60
dd_Smed_v6_4090_0_1	TMPRSS11D	Transmembrane protease serine 11D	Prss52	Serine protease 52	19.6202	Contig250	2.13371	9.0688	5.16e-05	4.47191	4.21836	1e-08	4.26789	4.21836	4.4e-08
dd_Smed_v6_4120_0_1	INHBE	Inhibin beta E chain	LOC100329520	Uncharacterized protein	22.416	Contig4428	1.56	7.44056	0.00016452	2.40578	5.2213	7.94e-14	2.15569	5.2213	2.27e-11
dd_Smed_v6_413_0_1	MBOAT2	Lysophospholipid acyltransferase 2	oys	Oysgedart, isoform A	35.2979	Contig5235	2.86388	10.7555	2.29e-05	4.61684	5.64846	1.76e-13	4.55966	5.64846	3.65e-13
dd_Smed_v6_4132_0_1	BACE1	Beta-secretase 1	Bace1	Beta-secretase 1	16.0225	Contig5988	0.515113	7.13755	0.0412828	1.63423	4.83725	6.19e-07	1.274	4.83725	0.000140591
dd_Smed_v6_4148_0_1	TRAF2	TNF receptor-associated factor 2	TRAF2	TNF receptor-associated factor 2	10.6937	PL05005B2B04	2.22524	8.02832	0.00064886	3.0288	3.96701	5.87e-15	3.07057	3.96701	2.96e-15
dd_Smed_v6_4170_0_1	STK25	Serine/threonine-protein kinase 25	stk25a	Zgc:92836	22.0989	Contig2289	0.855884	7.09648	0.0022326	1.86227	4.1112	3.78e-07	2.04679	4.1112	2.59e-08
dd_Smed_v6_4178_0_1	WDR45B	WD repeat domain phosphoinositide-interacting protein 3	Wdr45b	WD repeat domain phosphoinositide-interacting protein 3	12.9775	Contig186	1.22018	7.615	0.000211592	1.69292	4.20426	1.93e-05	1.60161	4.20426	6.31e-05
dd_Smed_v6_4182_0_1	SPG21	Maspardin	SPG21	Maspardin	16.0396	PL05005A2D06	0.768313	8.44447	0.0102911	1.01677	4.49977	0.00113221	1.36778	4.49977	8.65e-06
dd_Smed_v6_4184_0_1	ENTPD1	Ectonucleoside triphosphate diphosphohydrolase 1	entpd1	Ectonucleoside triphosphate diphosphohydrolase 1	11.0236	Contig356	0.596217	7.27056	0.00306684	1.36982	4.98076	0.000210496	1.1063	4.98076	0.00381982
dd_Smed_v6_419_0_1	RAB7A	Ras-related protein Rab-7a	Rab7a	Ras-related protein Rab-7a	226.162	Contig1170	1.79274	10.0733	5.38e-05	1.04651	8.03698	0.000178952	0.936271	8.03698	0.0010403
dd_Smed_v6_4193_0_1	SVIL	Supervillin	SVIL	Supervillin	4.82596	PL04009A1F04	0.881495	7.86441	0.00548893	1.13067	4.80664	0.00211748	1.27011	4.80664	0.000554001
dd_Smed_v6_4195_0_1	NA	NA	NA	NA	19.8872	Contig3416	1.83748	7.61491	0.000620838	2.50819	5.26438	5.13e-12	2.36475	5.26438	8.35e-11
dd_Smed_v6_4198_0_1	SGK3	Serine/threonine-protein kinase Sgk3	sgk3	Serum/glucocorticoid-regulated kinase family, member 3	32.1748	Contig667	1.31933	7.34709	0.000294147	3.88467	5.6734	3.51e-16	3.77918	5.6734	1.96e-15
dd_Smed_v6_4201_0_1	PDP2	[Pyruvate dehydrogenase [acetyl-transferring]]-phosphatase 2, mitochondrial	Pdp	GM14286p	5.21649	Contig2217	0.712662	7.55551	0.00100391	0.851137	3.31566	0.0533191	1.21735	3.31566	0.00419268
dd_Smed_v6_423_0_1	CSTA	Cystatin-A	Csta	Cystatin-A	532.736	Contig7451	1.52504	8.98171	0.0139608	2.04895	8.06094	5.93e-08	1.93835	8.06094	3.46e-07
dd_Smed_v6_4236_0_1	UBR2	E3 ubiquitin-protein ligase UBR2	ubr2	Ubiquitin protein ligase E3 component n-recognin 2	5.67084	Contig5258	0.761585	7.82628	0.000944337	1.21885	5.18002	1.55e-05	1.13547	5.18002	7.01e-05
dd_Smed_v6_4253_0_1	ARHGAP35	Rho GTPase-activating protein 35	RhoGAPp190	Rho GTPase-activating protein 190	11.7635	PL06004A2H07	0.689228	6.62006	0.0128128	1.50781	5.63445	5.7e-06	1.78486	5.63445	7.69e-08
dd_Smed_v6_4259_0_1	MAP3K4	Mitogen-activated protein kinase kinase kinase 4	MAP3K4	Mitogen-activated protein kinase kinase kinase 4	19.5388	Contig4255	1.5008	7.64546	0.0276997	6.20206	5.36099	1.77e-43	6.5023	5.36099	1.51e-46
dd_Smed_v6_4270_0_1	GLTPD1	Ceramide-1-phosphate transfer protein	cptp	Ceramide-1-phosphate transfer protein	28.4662	Contig3552	0.576866	7.47645	0.00565374	1.286	4.60565	6.11e-05	0.705014	4.60565	0.0454136
dd_Smed_v6_4278_0_1	SOAT1	Sterol O-acyltransferase 1	Soat1	Sterol O-acyltransferase 1	78.8951	Contig2569	1.02076	7.99557	0.000312217	2.87808	7.11942	4.06e-26	2.67135	7.11942	6.63e-23
dd_Smed_v6_4285_0_1	NA	NA	CELE_Y59A8B.21	Uncharacterized protein	30.324	PL05001A1F08	1.22088	7.95594	0.00158069	0.983753	5.63673	0.000480218	1.03064	5.63673	0.000274661
dd_Smed_v6_4287_0_1	NA	NA	NA	NA	45.4461	Contig6094	1.16296	8.15163	0.00445731	3.02262	5.55906	5.89e-25	2.98731	5.55906	1.99e-24
dd_Smed_v6_4288_0_1	NA	NA	NA	NA	46.9434	Contig6213	0.613411	8.31557	0.00481998	1.08469	6.53582	9.73e-05	0.869804	6.53582	0.00254229
dd_Smed_v6_4290_0_1	SLC6A5	Sodium- and chloride-dependent glycine transporter 2	Slc6a5	Sodium- and chloride-dependent glycine transporter 2	6.31316	Contig4940	1.16325	6.85224	0.00107939	5.45691	3.54223	1.68e-18	5.14577	3.54223	6.88e-17
dd_Smed_v6_4297_0_1	RAB6B	Ras-related protein Rab-6B	RAB6B	Ras-related protein Rab-6B	45.7927	Contig1300	0.856484	8.34577	0.00145801	1.37747	5.34382	7.45e-05	1.21916	5.34382	0.000584382
dd_Smed_v6_4305_0_1	LDAH	Lipid droplet-associated hydrolase	Ldah	Lipid droplet-associated hydrolase	21.6721	Contig5294	1.05429	7.48845	0.000348714	2.68843	4.46084	1.73e-12	2.44352	4.46084	1.45e-10
dd_Smed_v6_4309_0_1	MPP2	MAGUK p55 subfamily member 2	mpp2a	Membrane protein, palmitoylated 2a (MAGUK p55 subfamily member 2)	9.158	Contig3274	0.752069	6.27394	0.00266575	1.50368	4.52545	2.65e-06	1.28135	4.52545	8.28e-05
dd_Smed_v6_4319_0_1	CYP3A5	Cytochrome P450 3A5	Cyp3a11	Cytochrome P450 3A11	33.7148	PL06016A2B03	0.385801	7.31807	0.022509	1.48877	6.12615	1.37e-08	1.35407	6.12615	3.16e-07
dd_Smed_v6_4322_0_1	ANK3	Ankyrin-3	Ank3	Ankyrin-3	4.60746	Contig2289	0.855884	7.09648	0.0022326	1.7946	3.36311	0.000782352	2.01189	3.36311	0.000174823
dd_Smed_v6_4332_0_1	ARAP2	Arf-GAP with Rho-GAP domain, ANK repeat and PH domain-containing protein 2	ARAP2	Arf-GAP with Rho-GAP domain, ANK repeat and PH domain-containing protein 2	2.23413	PL030017B10A08	0.647182	6.63359	0.00511598	1.31507	3.18535	0.00727699	1.59749	3.18535	0.00100356
dd_Smed_v6_4339_0_1	NA	NA	NA	NA	21.7839	Contig5402	0.36514	7.23396	0.0252357	1.31858	4.98189	3.73e-05	1.04415	4.98189	0.00154909
dd_Smed_v6_4368_0_1	TRAF2	TNF receptor-associated factor 2	TRAF2	TNF receptor-associated factor 2	10.2039	Contig1909	0.604757	7.91993	0.00877904	1.37863	4.28072	2.23e-05	1.32591	4.28072	5.41e-05
dd_Smed_v6_4388_0_1	RRAGA	Ras-related GTP-binding protein A	Rraga	Ras-related GTP-binding protein A	26.2888	Contig6759	0.588074	6.82053	0.0115376	1.329	5.23177	3.1e-06	0.758634	5.23177	0.0131567
dd_Smed_v6_4391_0_1	AASDHPPT	L-aminoadipate-semialdehyde dehydrogenase-phosphopantetheinyl transferase	aasdhppt	Aminoadipate-semialdehyde dehydrogenase-phosphopantetheinyl transferase	12.9801	Contig6306	0.775244	8.07727	0.00274361	1.47977	3.8454	0.00162607	1.97171	3.8454	2.31e-05
dd_Smed_v6_4393_0_1	AKT3	RAC-gamma serine/threonine-protein kinase	Akt1	RAC serine/threonine-protein kinase	7.54166	Contig7154	0.473025	7.6385	0.0130274	1.0974	4.14658	0.00727699	0.748861	4.14658	0.092494
dd_Smed_v6_4399_0_1	MAPKAPK3	MAP kinase-activated protein kinase 3	MAPk-Ak2	MAP kinase-activated protein kinase 2	21.761	PL05001A2D12	1.30919	8.09806	0.00101618	1.8196	5.01082	2.79e-06	1.7853	5.01082	4.99e-06
dd_Smed_v6_44_0_1	NA	NA	CG44251	Uncharacterized protein, isoform B	14311.7	Contig330	4.63412	14.3694	2.29e-05	6.41938	13.32	6.54e-45	6.34229	13.32	4.2e-44
dd_Smed_v6_440_0_1	CD63	CD63 antigen	cd63	Tetraspanin	208.288	Contig2237	2.87733	11.1108	2.9e-05	2.48332	7.52966	1.1e-10	2.39704	7.52966	5.37e-10
dd_Smed_v6_4416_0_1	GCDH	Glutaryl-CoA dehydrogenase, mitochondrial	GCDH	Glutaryl-CoA dehydrogenase, mitochondrial	14.78	Contig5685	0.550017	7.66579	0.0054819	1.21899	4.7058	1.4e-05	1.01945	4.7058	0.000381911
dd_Smed_v6_4418_0_1	TMEM63C	Calcium permeable stress-gated cation channel 1	TMEM63C	Calcium permeable stress-gated cation channel 1	8.78313	Contig6455	0.931095	7.19836	0.00237171	1.5291	4.54294	6.01e-06	1.75274	4.54294	2.12e-07
dd_Smed_v6_442_0_1	GRN	Granulins	GRN	Granulins	104.257	Contig2381	3.64913	11.3698	2.29e-05	3.40254	6.53909	3.54e-11	3.44281	6.53909	2.61e-11
dd_Smed_v6_443_0_1	FTH1	Ferritin heavy chain	fth1a	Ferritin	261.845	Contig7703	2.01036	10.8699	0.000339823	1.4907	7.74495	3.45e-07	1.46836	7.74495	6.18e-07
dd_Smed_v6_4436_0_1	DSTYK	Dual serine/threonine and tyrosine protein kinase	Dstyk	Dual serine/threonine and tyrosine protein kinase	11.0479	Contig4177	1.14489	7.41448	0.0014722	2.59742	5.05323	3.55e-16	2.50176	5.05323	4.12e-15
dd_Smed_v6_4449_0_1	CYP2A6	Cytochrome P450 2A6	CYP2A6	Cytochrome P450 2A6	28.4358	PL06010A1H02	1.75487	8.68978	0.00105754	3.78297	5.50656	1.11e-21	3.95526	5.50656	2.97e-23
dd_Smed_v6_4461_0_1	NA	NA	NA	NA	8.91212	PL06009A2C02	0.558765	6.83577	0.00757305	2.36992	4.66816	1.3e-07	2.28031	4.66816	4.38e-07
dd_Smed_v6_4469_0_1	NA	NA	snx24	Sorting nexin 24	37.6744	Contig1901	1.55873	8.27818	0.00013505	2.52975	4.56823	6.42e-07	2.54905	4.56823	6.22e-07
dd_Smed_v6_448_0_1	CORO1C	Coronin-1C	coro	Coronin	33.5364	Contig6081	1.50541	9.64018	0.00108985	1.94702	6.11605	1.57e-09	1.75342	6.11605	6.61e-08
dd_Smed_v6_4487_0_1	H2AFY2	Core histone macro-H2A.2	h2afy	Core histone macro-H2A	8.75239	Contig2797	0.691266	7.66102	0.00184071	1.63498	3.53173	0.00899035	1.51806	3.53173	0.0182205
dd_Smed_v6_4493_0_1	GNAL	Guanine nucleotide-binding protein G(olf) subunit alpha	gnal	Guanine nucleotide-binding protein (G protein), alpha-activating activity polypeptide, olfactory type	14.5324	Contig4365	1.35166	7.48979	8.03e-05	1.54571	5.49234	2.25e-07	1.5234	5.49234	3.98e-07
dd_Smed_v6_4496_0_1	MPPED1	Metallophosphoesterase domain-containing protein 1	MPPED1	Metallophosphoesterase domain-containing protein 1	19.9819	Contig1241	1.01267	7.26561	0.00107284	1.39268	4.40911	2.83e-05	1.55251	4.40911	3.11e-06
dd_Smed_v6_4520_0_1	MPDZ	Multiple PDZ domain protein	Mpdz	Multiple PDZ domain protein	3.19841	Contig3184	0.692538	6.86646	0.00155286	2.16387	3.32268	1.7e-05	1.90975	3.32268	0.00017615
dd_Smed_v6_4532_0_1	TSNAXIP1	Translin-associated factor X-interacting protein 1	TSNAXIP1	Translin-associated factor X-interacting protein 1	11.482	Contig7392	1.12626	7.65894	0.00680703	2.3004	5.08491	5.13e-16	2.1704	5.08491	2.11e-14
dd_Smed_v6_4534_0_1	VPS16	Vacuolar protein sorting-associated protein 16 homolog	vps16	MGC162584 protein	8.15478	PL04010A2A09	0.599654	7.27091	0.0168502	1.61235	4.54593	3.23e-06	1.45018	4.54593	3.51e-05
dd_Smed_v6_4550_0_1	VPS18	Vacuolar protein sorting-associated protein 18 homolog	vps18	Vacuolar protein sorting-associated protein 18 homolog	9.38287	PL06013B1A07	0.449785	6.53081	0.0276188	1.34443	4.85926	3.89e-05	1.49139	4.85926	5.2e-06
dd_Smed_v6_4553_0_1	STK4	Serine/threonine-protein kinase 4	STK4	Serine/threonine-protein kinase 4	10.4859	Contig1545	1.17885	8.06495	0.000223614	1.26754	5.05975	8.63e-05	1.25529	5.05975	0.000116721
dd_Smed_v6_456_0_1	CTSF	Cathepsin F	ctsf	Cathepsin F	344.024	Contig6032	1.19031	9.94514	0.00640551	2.8234	9.4057	7.73e-18	1.49668	9.4057	5.02e-06
dd_Smed_v6_4567_0_1	NA	NA	NA	NA	31.4982	Contig1498	2.36672	8.65754	0.000368754	5.75076	4.64401	1.37e-48	5.56683	4.64401	3.4e-46
dd_Smed_v6_4574_0_1	NA	NA	NA	NA	12.3199	Contig2727	0.617184	6.24523	0.00515463	1.26776	4.44817	0.000704238	1.07889	4.44817	0.00522177
dd_Smed_v6_4591_0_1	GGT1	Gamma-glutamyltranspeptidase 1	GGT1	Gamma-glutamyltranspeptidase 1	16.8631	Contig1806	1.6097	8.55832	0.000109268	2.18001	5.21978	4.01e-15	1.78044	5.21978	1.59e-10
dd_Smed_v6_4596_0_1	FLVCR2	Feline leukemia virus subgroup C receptor-related protein 2	dirc2	Disrupted in renal carcinoma 2	16.8504	Contig2590	0.647615	8.39426	0.00350422	2.26233	4.74408	1.06e-07	2.10978	4.74408	8.23e-07
dd_Smed_v6_4598_0_1	NA	NA	NA	NA	132.496	Contig739	2.15824	9.07478	3.84e-05	6.56386	7.22125	1.21e-32	6.08085	7.22125	2.67e-29
dd_Smed_v6_4607_0_1	NA	NA	CELE_Y59A8B.21	Uncharacterized protein	16.4218	Contig4482	1.06077	7.59661	0.00887456	2.79945	4.74034	4.79e-11	2.56849	4.74034	1.66e-09
dd_Smed_v6_4615_0_1	GALNT1	Polypeptide N-acetylgalactosaminyltransferase 1	gly-5	Polypeptide N-acetylgalactosaminyltransferase 5	10.7844	Contig6061	0.478212	7.88524	0.00986231	1.03999	4.6367	0.00275365	1.05186	4.6367	0.00278501
dd_Smed_v6_4616_0_1	VAC14	Protein VAC14 homolog	Vac14	Protein VAC14 homolog	22.4905	Contig4059	0.485496	6.49236	0.0151713	2.53812	5.93684	2.91e-16	2.20492	5.93684	1.09e-12
dd_Smed_v6_4634_0_1	SLC16A12	Monocarboxylate transporter 12	CELE_Y59A8B.21	Uncharacterized protein	99.7219	Contig1258	1.39117	7.94094	0.000649094	3.89608	7.12497	6.96e-30	3.6918	7.12497	2.41e-27
dd_Smed_v6_4655_0_1	C5orf22	UPF0489 protein C5orf22	MESR6	LD22716p	3.07158	PL06020B1C09	0.388138	6.7532	0.0193982	1.68	2.55413	0.006579	1.52854	2.55413	0.0162236
dd_Smed_v6_4660_0_1	NA	NA	NA	NA	6.53284	PL06013B1C04	0.556118	6.38912	0.019001	1.39716	5.64404	3.54e-06	1.36562	5.64404	6.87e-06
dd_Smed_v6_4666_0_1	NA	NA	NA	NA	23.4673	Contig1197	1.70424	8.37181	0.000124428	5.52807	3.97993	1.44e-18	5.74742	3.97993	1.3e-19
dd_Smed_v6_4672_0_1	NA	NA	Mblac1	Metallo-beta-lactamase domain-containing protein 1	31.3072	Contig3868	0.443238	8.18596	0.0182439	1.10416	4.89539	0.00104968	1.24885	4.89539	0.000206491
dd_Smed_v6_4678_0_1	NA	NA	NA	NA	24.3461	Contig7185	0.362743	6.89184	0.0400201	0.943972	4.06915	0.0212596	1.1152	4.06915	0.00616581
dd_Smed_v6_4685_0_1	CREB1	CREB1 protein	CREB1	CREB1 protein	7.60516	Contig4585	0.778303	7.23379	0.000457758	1.11473	4.07215	0.000480339	0.933556	4.07215	0.00468797
dd_Smed_v6_4694_0_1	SLC16A14	Monocarboxylate transporter 14	CELE_Y59A8B.21	Uncharacterized protein	24.1131	Contig1454	1.37525	8.43612	0.000973495	1.71261	5.2286	1.4e-09	1.54022	5.2286	6.54e-08
dd_Smed_v6_4695_0_1	WNK4	Serine/threonine-protein kinase WNK4	Wnk4	Serine/threonine-protein kinase WNK4	24.2114	PL08004A2H01	1.48706	6.89823	0.00143314	1.69667	6.39092	1.91e-10	1.56345	6.39092	5.54e-09
dd_Smed_v6_4722_0_1	MAP2K3	Dual specificity mitogen-activated protein kinase kinase 3	MAP2K3	Dual specificity mitogen-activated protein kinase kinase 3	21.8021	Contig4879	1.14307	8.15992	0.000300792	1.40771	4.96871	1.6e-05	1.15608	4.96871	0.000538136
dd_Smed_v6_4729_0_1	TRAF3	TNF receptor-associated factor 3	Traf3	TNF receptor-associated factor 3	20.5076	Contig4173	0.469025	7.90418	0.0068361	1.99557	4.07147	1.17e-07	2.07669	4.07147	4e-08
dd_Smed_v6_4739_0_1	SLC11A2	Natural resistance-associated macrophage protein 2	Slc11a2	Natural resistance-associated macrophage protein 2	12.9212	Contig3248	1.37812	7.7065	0.000132414	3.3774	4.5092	4.38e-14	3.09542	4.5092	3.74e-12
dd_Smed_v6_476_0_1	GDI2	Rab GDP dissociation inhibitor beta	GDI2	Rab GDP dissociation inhibitor beta	18.7348	Contig2264	1.26446	9.81188	0.000296713	1.29256	5.09577	0.000103933	1.59611	5.09577	1.52e-06
dd_Smed_v6_4766_0_1	NAA60	N-alpha-acetyltransferase 60	Naa60	N-alpha-acetyltransferase 60	16.1092	Contig1845	0.43369	7.92909	0.0311579	1.13289	4.03171	0.00679069	1.12356	4.03171	0.00828308
dd_Smed_v6_4779_0_1	EPN1	Epsin-1	epn-1	EPsiN (Endocytic protein) homolog	24.6586	Contig3992	0.556683	7.90911	0.00376937	1.08848	6.16945	8.03e-05	1.11256	6.16945	6.28e-05
dd_Smed_v6_4785_0_1	ASMTL	N-acetylserotonin O-methyltransferase-like protein	1810009N02Rik	Putative uncharacterized protein	92.6152	Contig2758	1.30286	9.11131	0.0001	1.07369	7.03685	0.000488932	0.909682	7.03685	0.00422713
dd_Smed_v6_4792_0_1	NOTCH4	Neurogenic locus notch homolog protein 4	ft	Cadherin-related tumor suppressor	6.58613	Contig7216	1.80685	7.83074	0.000683683	3.89414	3.73013	2.32e-21	3.05721	3.73013	3.25e-14
dd_Smed_v6_48_0_1	CTSL	Cathepsin L1	ctsl.1	Cathepsin L.1	7843.12	Contig240	5.05844	13.7354	2.29e-05	5.03284	13.1276	5.17e-37	5.07074	13.1276	2.12e-37
dd_Smed_v6_4809_0_1	NA	NA	NA	NA	20.0381	Contig2014	0.988596	7.14708	0.0011217	1.27552	4.72788	0.000156771	1.31735	4.72788	0.000104768
dd_Smed_v6_4821_0_1	PXK	PX domain-containing protein kinase-like protein	PXK	PX domain-containing protein kinase-like protein	7.52902	Contig2268	1.21223	7.44464	0.000255934	2.43993	3.87861	6.63e-11	1.8735	3.87861	6.4e-07
dd_Smed_v6_4823_0_1	GGA1	ADP-ribosylation factor-binding protein GGA1	GGA1	ADP-ribosylation factor-binding protein GGA1	8.08922	Contig529	1.12553	7.95822	0.000109358	1.0594	4.46418	0.0007853	0.76091	4.46418	0.0235007
dd_Smed_v6_4828_0_1	NA	NA	NA	NA	4.26261	Contig2573	1.00808	7.69872	0.0200291	3.0348	2.18106	1.36e-05	2.85567	2.18106	4.69e-05
dd_Smed_v6_4832_0_1	CARMIL1	F-actin-uncapping protein LRRC16A	Carmil1	F-actin-uncapping protein LRRC16A	5.66492	PL08003B2H11	0.872676	7.73796	0.00320222	1.31733	4.37432	0.00150656	1.3705	4.37432	0.00105466
dd_Smed_v6_4834_0_1	SDR16C5	Epidermal retinol dehydrogenase 2	sdr16c5a	Short chain dehydrogenase/reductase family 16C, member 5a	16.589	Contig3887	0.726152	8.06912	0.00925655	1.59335	5.58884	1.69e-08	1.56787	5.58884	3.37e-08
dd_Smed_v6_4836_0_1	SLC2A13	Proton myo-inositol cotransporter	SLC2A13	Proton myo-inositol cotransporter	4.64607	Contig1055	0.929098	6.95253	0.00174119	1.39911	2.59954	0.0310384	1.94228	2.59954	0.0022675
dd_Smed_v6_4849_0_1	MAP3K5	Mitogen-activated protein kinase kinase kinase 5	Map3k5	Mitogen-activated protein kinase kinase kinase 5	7.17878	Contig1959	0.654023	6.75514	0.0077637	1.25571	5.11794	1.47e-05	1.20762	5.11794	3.68e-05
dd_Smed_v6_485_0_1	PLBD2	Putative phospholipase B-like 2	zgc:158619	Zgc:158619 protein	190.016	Contig980	3.11414	11.1796	2.29e-05	2.03595	8.54019	4.08e-12	1.90544	8.54019	1e-10
dd_Smed_v6_4858_0_1	TMEM106A	Transmembrane protein 106A	tmem106ba	Transmembrane protein 106Ba	42.9	Contig1594	1.57065	8.48255	7.31e-05	2.16744	5.36248	5.76e-13	2.22822	5.36248	1.52e-13
dd_Smed_v6_4869_0_1	USP47	Ubiquitin carboxyl-terminal hydrolase 47	Usp47	Ubiquitin carboxyl-terminal hydrolase 47	19.8763	Contig6197	2.49804	7.87883	0.000836938	6.5052	4.6635	4.97e-39	6.27856	4.6635	5.24e-37
dd_Smed_v6_487_0_1	GCLM	Glutamate--cysteine ligase regulatory subunit	GCLM	Glutamate--cysteine ligase regulatory subunit	334.859	Contig5506	1.01674	8.44144	0.00392025	0.63045	8.98043	0.0495609	1.2085	8.98043	5.73e-05
dd_Smed_v6_4876_0_1	NA	NA	NA	NA	12.4321	PL04025B1G01	1.11173	7.63907	0.00196014	3.71918	3.58812	1.58e-10	3.74497	3.58812	1.44e-10
dd_Smed_v6_488_0_1	RAB1A	Ras-related protein Rab-1A	rab1aa	RAB1A, member RAS oncogene family a	295.213	Contig3635	1.30006	10.2251	0.00049642	1.16832	8.19754	2.71e-05	1.01403	8.19754	0.00035714
dd_Smed_v6_4884_0_1	NA	NA	NA	NA	33.1283	Contig7234	0.507582	7.43841	0.0154267	1.25801	4.90043	5.94e-05	1.27645	4.90043	5.22e-05
dd_Smed_v6_4894_0_1	WDFY2	WD repeat and FYVE domain-containing protein 2	WDFY2	WD repeat and FYVE domain-containing protein 2	12.3712	Contig6545	0.85863	8.00062	0.00899528	2.38585	4.25041	1.7e-10	1.87557	4.25041	6.18e-07
dd_Smed_v6_4896_0_1	HPRT1	Hypoxanthine-guanine phosphoribosyltransferase	Hprt1	Hypoxanthine-guanine phosphoribosyltransferase	16.1068	Contig2286	1.01147	7.83124	0.000694513	1.76802	4.5793	1.67e-08	1.62125	4.5793	2.87e-07
dd_Smed_v6_491_0_1	RAB7A	Ras-related protein Rab-7a	rab7	RAB7, member RAS oncogene family	193.966	Contig614	2.46969	10.6144	2.44e-05	2.54047	7.54175	1.45e-14	2.35379	7.54175	1.03e-12
dd_Smed_v6_4918_0_1	TMUB2	Transmembrane and ubiquitin-like domain-containing protein 2	Tmub2	Transmembrane and ubiquitin-like domain-containing protein 2	12.6257	Contig4891	1.05063	7.43442	0.00497333	1.26161	4.39095	0.000244719	1.17833	4.39095	0.000752922
dd_Smed_v6_4921_0_1	ANK2	Ankyrin-2	ank3a	Ankyrin 3a	30.1657	Contig4405	0.875038	8.10173	0.000559203	1.15931	5.01483	5.53e-05	0.859723	5.01483	0.00416905
dd_Smed_v6_4922_0_1	ACAD10	Acyl-CoA dehydrogenase family member 10	Dmel\CG6638	CG6638	21.4383	Contig6342	0.6026	7.34059	0.00869049	2.18967	5.51773	6.04e-11	2.18481	5.51773	7.78e-11
dd_Smed_v6_4935_0_1	NLGN4X	Neuroligin-4, X-linked	nlgn4b	Neuroligin 4b	6.28288	Contig5540	0.697654	8.07595	0.00144637	1.58111	3.96251	1.15e-06	1.44392	3.96251	1.11e-05
dd_Smed_v6_4936_0_1	NA	NA	NA	NA	10.6768	Contig2915	0.892004	7.81412	0.00107477	1.40981	2.75796	0.00691944	1.33779	2.75796	0.0122918
dd_Smed_v6_4964_0_1	RAB11A	Ras-related protein Rab-11A	Rab11	Drab11	5.16293	Contig2392	1.16704	7.69647	0.000897941	2.42162	2.3182	0.000157096	3.03608	2.3182	2.66e-06
dd_Smed_v6_4970_0_1	ACP5	Tartrate-resistant acid phosphatase type 5	Acp5	Tartrate-resistant acid phosphatase type 5	13.9919	Contig2271	1.21082	7.38825	0.000845893	1.4519	4.0534	0.00136699	1.23207	4.0534	0.00866041
dd_Smed_v6_4971_0_1	NA	NA	Tmem144	Transmembrane protein 144	156.661	Contig6286	1.72014	8.01569	0.00173134	4.65893	7.67004	3.27e-48	4.80139	7.67004	1.95e-50
dd_Smed_v6_498_0_1	STARD10	START domain-containing protein 10	Stard10	START domain-containing protein 10	304.472	Contig6485	1.05156	9.87046	0.00291581	1.46309	8.50561	4.27e-07	1.29718	8.50561	9.57e-06
dd_Smed_v6_4983_0_1	FAM200B	Protein FAM200B	FAM200B	Protein FAM200B	6.84351	Contig781	2.37252	8.44572	2.78e-05	2.64285	4.47394	3.21e-12	2.62004	4.47394	5.71e-12
dd_Smed_v6_4992_0_1	ZFAND5	AN1-type zinc finger protein 5	Zfand4	AN1-type zinc finger protein 4	21.7249	Contig4355	0.546719	6.32861	0.00431178	2.47337	5.47624	1.23e-12	2.1702	5.47624	4.8e-10
dd_Smed_v6_4993_0_1	USP46	Ubiquitin carboxyl-terminal hydrolase 46	usp-3	Ubiquitinyl hydrolase 1	19.2533	Contig5095	1.14661	7.93944	0.000215925	0.820774	4.79952	0.0227216	1.02928	4.79952	0.00372373
dd_Smed_v6_500_0_1	NA	NA	NA	NA	359.809	Contig5535	3.22524	11.6143	2.57e-05	5.83129	8.17541	7.14e-66	5.46182	8.17541	7.28e-60
dd_Smed_v6_5009_0_1	VPS25	Vacuolar protein-sorting-associated protein 25	vps25	Vacuolar protein-sorting-associated protein 25	22.4037	Contig1215	0.528258	7.80419	0.0054698	1.2224	4.12533	0.00012592	1.38668	4.12533	1.33e-05
dd_Smed_v6_502_0_1	RMDN1	Regulator of microtubule dynamics protein 1	RMDN1	Regulator of microtubule dynamics protein 1	574.417	Contig2191	1.92863	10.5142	0.00105301	1.3534	9.11625	3.22e-05	1.23058	9.11625	0.000196498
dd_Smed_v6_5021_0_1	NA	NA	NA	NA	13.9315	Contig7115	0.658362	8.63045	0.013669	1.47323	3.40545	0.00172461	0.882697	3.40545	0.08822
dd_Smed_v6_5049_0_1	RAB6A	Ras-related protein Rab-6A	RAB6A	Ras-related protein Rab-6A	22.3967	Contig3247	1.21475	7.19734	0.00262216	4.19188	4.26534	8.4e-24	4.23284	4.26534	3.69e-24
dd_Smed_v6_5056_0_1	NA	NA	NA	NA	68.7518	Contig737	2.40178	9.29375	2.81e-05	7.25312	5.62124	6.45e-65	7.04695	5.62124	3.7e-62
dd_Smed_v6_5067_0_1	NA	NA	NA	NA	14.4109	Contig7433	0.894649	8.53549	0.0112923	2.84748	3.74397	2.65e-09	2.88375	3.74397	2.01e-09
dd_Smed_v6_5083_0_1	ATG7	Ubiquitin-like modifier-activating enzyme ATG7	ATG7	Ubiquitin-like modifier-activating enzyme ATG7	17.7619	PL05001A1C04	1.17287	7.89491	0.00642848	2.11306	5.40366	8.36e-14	2.09184	5.40366	1.69e-13
dd_Smed_v6_5091_0_1	NA	NA	NA	NA	4.38773	Contig1156	0.920817	7.82327	0.000202894	2.39751	2.34346	0.000383887	2.80573	2.34346	3.76e-05
dd_Smed_v6_5093_0_1	NA	NA	NA	NA	5.10472	Contig6914	1.13216	7.1781	0.00110191	1.88048	2.93904	0.00079434	1.63171	2.93904	0.004545
dd_Smed_v6_5143_0_1	ADAM9	Disintegrin and metalloproteinase domain-containing protein 9	Meltrin	ADAM metalloprotease	4.79875	Contig2176	1.52908	7.59572	9.91e-05	1.31845	4.28594	3.15e-05	1.43086	4.28594	6.5e-06
dd_Smed_v6_5184_0_1	BLOC1S4	Biogenesis of lysosome-related organelles complex 1 subunit 4	bloc1s4	Biogenesis of lysosomal organelles complex-1, subunit 4, cappuccino	6.99196	Contig2431	1.07687	6.93165	0.000200451	2.2219	1.90321	0.00442737	2.10472	1.90321	0.00819234
dd_Smed_v6_5186_0_1	TBCEL	Tubulin-specific chaperone cofactor E-like protein	mlt	GH13040p	20.104	PL08001B1C02	0.835679	8.59632	0.0121986	1.87984	4.99393	6.13e-08	1.508	4.99393	1.83e-05
dd_Smed_v6_5189_0_1	TNFAIP8L2	Tumor necrosis factor alpha-induced protein 8-like protein 2	tnfaip8l3	Tumor necrosis factor alpha-induced protein 8-like protein 3	17.6422	Contig6981	0.863816	6.10335	0.00146198	1.01452	3.89247	0.018493	1.2398	3.89247	0.00358554
dd_Smed_v6_5192_0_1	PAK1	Serine/threonine-protein kinase PAK 1	pak1	P21 protein (Cdc42/Rac)-activated kinase 1	56.5174	Contig1109	1.26512	8.72816	0.000316903	1.75036	5.65694	1.53e-09	1.69731	5.65694	5.62e-09
dd_Smed_v6_522_0_1	RALA	Ras-related protein Ral-A	Rala	Ras-related protein Ral-A	120.339	Contig344	2.15634	10.3342	2.44e-05	2.01139	6.96216	6.4e-13	2.02753	6.96216	4.92e-13
dd_Smed_v6_5238_0_1	FLVCR2	Feline leukemia virus subgroup C receptor-related protein 2	Mfsd7	Major facilitator superfamily domain-containing protein 7	4.96517	Contig4995	0.691864	7.03745	0.0030276	3.86463	2.93582	2.99e-07	3.71998	2.93582	8.66e-07
dd_Smed_v6_5241_0_1	TSPAN6	Tetraspanin-6	Tspan6	Tetraspanin-6	32.764	Contig3022	1.83528	8.44915	0.000159022	3.60687	4.89942	5.11e-20	3.12229	4.89942	1.03e-15
dd_Smed_v6_5247_0_1	ALOX12B	Arachidonate 12-lipoxygenase, 12R-type	ALOX12B	Arachidonate 12-lipoxygenase, 12R-type	8.26142	Contig544	0.646644	8.33743	0.0117327	1.14923	3.66997	0.0064479	1.1336	3.66997	0.00824675
dd_Smed_v6_526_0_1	AHCY	Adenosylhomocysteinase	ahcy	Adenosylhomocysteinase	275.984	Contig1200	0.345021	11.2269	0.0160437	2.05274	8.72914	1.1e-09	1.71886	8.72914	4.13e-07
dd_Smed_v6_5267_0_1	SNX30	Sorting nexin-30	SNX30	Sorting nexin-30	20.8397	Contig5833	0.928548	7.48238	0.00702041	2.20758	4.84493	1.33e-14	2.3535	4.84493	2.71e-16
dd_Smed_v6_5298_0_1	NA	NA	NA	NA	11.5209	PL06017A1B09	0.476377	6.75904	0.0167614	1.25606	5.28821	0.000331805	1.35045	5.28821	0.000120767
dd_Smed_v6_5339_0_1	NA	NA	CG2794	CG2794	11.8181	Contig2349	0.456286	6.53241	0.0200872	3.01343	4.78346	8.58e-24	3.2009	4.78346	2.22e-26
dd_Smed_v6_5344_0_1	CYP2F1	Cytochrome P450 2F1	Cyp2f2	Cytochrome P450 2F2	28.6322	Contig6917	2.44099	8.7511	0.000679267	5.29024	5.59097	8.47e-32	5.2531	5.59097	2e-31
dd_Smed_v6_5369_0_1	ATG9A	Autophagy-related protein 9A	Atg9	Autophagy-related protein 9	2.33041	PL08010A1A11	0.640459	7.63934	0.0280843	1.79454	2.55824	0.000447121	1.18363	2.55824	0.0300873
dd_Smed_v6_5388_0_1	NA	NA	NA	NA	3.33658	Contig5643	1.23806	7.71369	0.00766764	2.3718	2.15085	0.0125454	2.92214	2.15085	0.0022426
dd_Smed_v6_54_0_1	NA	NA	CG10527	Uncharacterized protein	6031.37	Contig536	3.82345	13.4992	2.29e-05	3.34428	12.1256	6.41e-20	3.21692	12.1256	1.26e-18
dd_Smed_v6_540_0_1	NA	NA	NA	NA	268.928	Contig631	3.22023	10.3722	2.61e-05	2.44334	9.41094	1.27e-15	2.31734	9.41094	3.39e-14
dd_Smed_v6_5400_0_1	CCDC22	Coiled-coil domain-containing protein 22	ccdc22	Coiled-coil domain-containing protein 22	20.7841	Contig6374	1.22129	7.3805	0.00269692	1.77097	5.37675	7.77e-09	1.68165	5.37675	5.13e-08
dd_Smed_v6_5408_0_1	METTL27	Methyltransferase-like protein 27	METTL27	Methyltransferase-like protein 27	12.1835	Contig375	1.33677	7.49697	0.00224555	5.60356	3.18394	3.07e-18	5.71217	3.18394	1.01e-18
dd_Smed_v6_5416_0_1	ZFYVE21	Zinc finger FYVE domain-containing protein 21	Zfyve21	Zinc finger FYVE domain-containing protein 21	6.1837	Contig927	0.712643	7.27662	0.00123794	1.10462	3.78546	0.008664	1.04418	3.78546	0.0155194
dd_Smed_v6_542_0_1	POR	NADPH--cytochrome P450 reductase	porb	NADPH--cytochrome P450 reductase	178.106	Contig425	1.50993	9.90903	9.98e-05	2.07066	8.6066	3.35e-13	1.97763	8.6066	4.16e-12
dd_Smed_v6_5420_0_1	NA	NA	NA	NA	19.0501	Contig130	0.477194	9.08315	0.0136277	1.20797	4.42409	0.000100408	0.693412	4.42409	0.0414008
dd_Smed_v6_5433_0_1	NA	NA	Plcxd3	PI-PLC X domain-containing protein 3	7.29835	Contig2968	1.1518	7.97933	0.000375728	2.35917	3.41683	9.91e-08	2.09951	3.41683	2.44e-06
dd_Smed_v6_5445_0_1	NA	NA	NA	NA	25.3919	Contig3155	1.86474	8.29109	0.000433576	3.00533	4.89357	3.24e-17	3.05415	4.89357	1.22e-17
dd_Smed_v6_545_0_1	ATP6V1G2	V-type proton ATPase subunit G 2	vha-10	Probable V-type proton ATPase subunit G	402.155	Contig118	1.46649	7.51988	0.00105408	1.99533	7.64254	5.41e-09	1.88029	7.64254	4.65e-08
dd_Smed_v6_5460_0_1	TRAF3	TNF receptor-associated factor 3	traf3	TNF receptor-associated factor 3	15.9945	PL06022B2D05	0.505147	8.16833	0.0255478	1.3936	3.95529	0.00216341	1.07647	3.95529	0.0244262
dd_Smed_v6_5472_0_1	NA	NA	NA	NA	30.223	Contig302	1.50357	8.0784	0.000156743	1.15251	5.15762	5.5e-05	1.01391	5.15762	0.000505867
dd_Smed_v6_5473_0_1	RNF123	E3 ubiquitin-protein ligase RNF123	Rspry1	RING finger and SPRY domain-containing protein 1	9.05544	Contig19	1.16231	8.25976	0.002336	1.3446	4.44106	0.000657247	1.04906	4.44106	0.0110401
dd_Smed_v6_5476_0_1	SLC13A3	Solute carrier family 13 member 3	slc13a5a	Sodium-dependent citrate transporter	24.7592	Contig5206	1.03101	7.4898	0.000794781	4.07457	5.51827	1.42e-28	4.23719	5.51827	2.23e-30
dd_Smed_v6_5510_0_1	TRAF3	TNF receptor-associated factor 3	Traf3	TNF receptor-associated factor 3	23.5725	Contig1559	1.90384	7.81383	6.13e-05	4.7388	4.89635	1.7e-32	4.52229	4.89635	3.67e-30
dd_Smed_v6_5528_0_1	SLC46A1	Proton-coupled folate transporter	Slc46a1	Proton-coupled folate transporter	18.6503	Contig2684	2.6546	8.65832	2.61e-05	6.94411	4.86283	5.6e-45	7.00898	4.86283	1.49e-45
dd_Smed_v6_553_0_1	HDLBP	Vigilin	hdlbpa	High density lipoprotein-binding protein a	113.088	Contig5029	0.819943	8.70424	0.00297784	1.25382	9.15294	1.29e-05	1.16307	9.15294	6.48e-05
dd_Smed_v6_5533_0_1	C16orf62	UPF0505 protein C16orf62	-	UPF0505 protein C16orf62 homolog	5.6694	Contig348	1.568	7.98043	4.79e-05	1.93439	4.12319	8.53e-07	1.88788	4.12319	1.82e-06
dd_Smed_v6_555_0_1	SH3D19	SH3 domain-containing protein 19	Sh3d19	SH3 domain-containing protein 19	869.736	Contig6657	1.58154	9.54107	0.00158925	1.33878	8.44636	8.27e-06	0.993341	8.44636	0.00138264
dd_Smed_v6_5559_0_1	RALGPS1	Ras-specific guanine nucleotide-releasing factor RalGPS1	Ralgps2	Ras-specific guanine nucleotide-releasing factor RalGPS2	8.24751	PL06011A1H04	0.485838	6.44774	0.015676	2.49314	3.94255	6.73e-11	2.53555	3.94255	3.79e-11
dd_Smed_v6_5578_0_1	YTHDF2	YTH domain-containing family protein 2	YTHDF2	YTH domain-containing family protein 2	26.377	Contig6103	0.905475	7.74484	0.00905332	1.17444	6.10844	4.55e-05	1.15036	6.10844	7.68e-05
dd_Smed_v6_5606_0_1	NA	NA	NA	NA	39.1846	Contig1579	2.30717	7.61414	8.29e-05	6.38018	4.84365	4.33e-24	6.5829	4.84365	3.77e-25
dd_Smed_v6_564_0_1	CNFN	Cornifelin	ponzr2	Plac8 onzin-related protein 2	209.159	Contig902	2.25125	10.9584	5.24e-05	5.55432	6.95947	1.53e-64	5.36905	6.95947	3.03e-61
dd_Smed_v6_5643_0_1	AGPAT3	1-acyl-sn-glycerol-3-phosphate acyltransferase gamma	AGPAT3	1-acyl-sn-glycerol-3-phosphate acyltransferase gamma	17.4736	Contig3433	0.93647	6.76012	0.00159121	2.09359	5.39212	3.94e-13	2.04538	5.39212	1.53e-12
dd_Smed_v6_5658_0_1	RPS6KB1	Ribosomal protein S6 kinase beta-1	rsks-1	Ribosomal protein S6 kinase beta	12.3496	Contig4789	0.445358	6.99684	0.0164532	1.02226	4.60373	0.00116976	1.08151	4.60373	0.000632176
dd_Smed_v6_5660_0_1	SLC9A1	Sodium/hydrogen exchanger 1	Nhe2	Sodium/hydrogen exchanger	22.346	PL06017A2G04	0.50189	6.14869	0.0107907	6.1212	5.56196	8.26e-58	5.81582	5.56196	1.54e-53
dd_Smed_v6_567_0_1	CYB5A	Cytochrome b5	cyb5a	Cyb5a protein	488.015	Contig4549	1.2087	8.47945	0.0021417	2.49917	8.2198	6.19e-18	2.45439	8.2198	2.51e-17
dd_Smed_v6_5671_0_1	MTTP	Microsomal triglyceride transfer protein large subunit	Mtp	SD01502p	10.7163	Contig3678	0.439804	7.28973	0.0129323	4.20743	4.78613	4.99e-41	4.1679	4.78613	2.08e-40
dd_Smed_v6_5699_0_1	PLEKHF2	Pleckstrin homology domain-containing family F member 2	rush	Pleckstrin homology domain-containing family F member 1 homolog	20.2863	Contig719	1.1521	7.03011	0.000431587	1.99215	4.08984	7.55e-06	2.11256	4.08984	2.33e-06
dd_Smed_v6_5702_0_1	SLC39A1	Zinc transporter ZIP1	Slc39a1	Zinc transporter ZIP1	102.985	Contig5795	2.19588	8.85438	0.000335695	5.71582	7.00152	1.07e-52	5.79469	7.00152	1.16e-53
dd_Smed_v6_5715_0_1	TRAF6	TNF receptor-associated factor 6	TRAF6	TNF receptor-associated factor 6	13.9849	Contig1145	1.78232	6.83884	0.000320818	2.45109	4.41664	4.69e-15	2.16924	4.41664	4.18e-12
dd_Smed_v6_5726_0_1	DAO	D-amino-acid oxidase	Dao	D-amino-acid oxidase	18.5033	Contig3412	1.22421	8.7531	0.000101977	2.64918	4.5327	1.55e-13	2.62721	4.5327	2.77e-13
dd_Smed_v6_5733_0_1	PTPRQ	Phosphatidylinositol phosphatase PTPRQ	Ptp10D	Tyrosine-protein phosphatase 10D	7.58409	PL05001B1C04	0.967318	6.61839	0.00730272	5.12143	3.48601	3.65e-14	5.24863	3.48601	1.27e-14
dd_Smed_v6_5751_0_1	RGS8	Regulator of G-protein signaling 8	RGS8	Regulator of G-protein signaling 8	15.1768	Contig4561	1.07268	8.13213	0.00053773	1.49192	5.42874	1.44e-06	1.31072	5.42874	2.95e-05
dd_Smed_v6_576_0_1	HEXB	Beta-hexosaminidase subunit beta	hexa	Beta-hexosaminidase	152.946	Contig843	2.91441	9.81624	2.53e-05	2.63569	8.14731	1.9e-12	2.43035	8.14731	8.62e-11
dd_Smed_v6_5782_0_1	RBCK1	RanBP-type and C3HC4-type zinc finger-containing protein 1	rbck1	RanBP-type and C3HC4-type zinc finger-containing protein 1	9.61781	Contig4636	0.724988	7.23993	0.0303201	1.21079	3.85686	0.000820847	1.05497	3.85686	0.00463902
dd_Smed_v6_5790_0_1	EIF4E	Eukaryotic translation initiation factor 4E	eif4e1a	Eukaryotic translation initiation factor 4E-1A	16.5355	Contig1385	0.931317	7.44827	0.00132963	1.38278	4.13139	0.0019716	1.67706	4.13139	0.00016246
dd_Smed_v6_5800_0_1	OCA2	P protein	Oca2	P protein	13.1395	PL06011A2B05	0.842764	7.08546	0.0305725	3.4257	4.87987	4.82e-22	3.0513	4.87987	4.38e-18
dd_Smed_v6_581_0_1	PPP6C	Serine/threonine-protein phosphatase 6 catalytic subunit	Ppp6c	Serine/threonine-protein phosphatase 6 catalytic subunit	60.5033	Contig6080	0.812273	10.2952	0.0073658	1.36691	6.22076	3.22e-07	1.33116	6.22076	7.8e-07
dd_Smed_v6_5810_0_1	NA	NA	tlcd2	TLC domain-containing protein 2	33.1574	Contig2964	1.46898	8.4114	7.72e-05	2.11515	5.39207	2.64e-12	1.65549	5.39207	5.49e-08
dd_Smed_v6_5815_0_1	VPS39	Vam6/Vps39-like protein	Vps39	Vam6/Vps39-like protein	12.688	Contig6026	0.470473	6.73743	0.0460753	1.67959	5.38598	3.19e-09	1.50224	5.38598	1.53e-07
dd_Smed_v6_583_0_1	NA	NA	NA	NA	546.239	Contig3985	3.49043	10.7245	2.64e-05	3.99968	9.60886	6.81e-29	3.96572	9.60886	1.88e-28
dd_Smed_v6_5845_0_1	ATXN7L3	Ataxin-7-like protein 3	ATXN7L3	Ataxin-7-like protein 3	13.612	Contig553	1.05962	8.2767	0.000408489	1.84366	3.85475	1.83e-06	1.83322	3.85475	2.39e-06
dd_Smed_v6_5857_0_1	PPP2R2A	Serine/threonine-protein phosphatase 2A 55 kDa regulatory subunit B alpha isoform	tws	Protein phosphatase PP2A 55 kDa regulatory subunit	12.8542	Contig2436	0.570932	7.338	0.00147237	1.36503	4.72508	0.000305888	1.47476	4.72508	0.000101973
dd_Smed_v6_5867_0_1	HSD17B4	Peroxisomal multifunctional enzyme type 2	hsd17b4	Hydroxysteroid (17-beta) dehydrogenase 4	7.50848	Contig6475	0.839915	7.17116	0.00585357	1.58539	4.02419	0.000213636	1.2315	4.02419	0.00560726
dd_Smed_v6_5886_0_1	CYB5D2	Neuferricin	cyb5d2	Neuferricin	21.271	Contig730	0.619586	7.39168	0.0166745	0.818432	4.90864	0.0262397	1.073	4.90864	0.002934
dd_Smed_v6_5888_0_1	-	Mucolipin 1 variant	Trpml	SD02261p	7.4453	Contig1864	0.879266	7.16706	0.000381698	1.03444	4.19686	0.00388913	0.742455	4.19686	0.0537705
dd_Smed_v6_5902_0_1	CYP3A43/CYP3A4	Cytochrome P450	CYP3A43/CYP3A4	Cytochrome P450	13.067	Contig4117	0.748944	6.69863	0.000823059	3.58373	4.34221	2.27e-19	3.3584	4.34221	2.36e-17
dd_Smed_v6_5926_0_1	NA	NA	NA	NA	9.90633	Contig4646	0.562594	6.69392	0.0060636	1.62589	4.37039	3.18e-05	1.97379	4.37039	4.43e-07
dd_Smed_v6_5932_0_1	MFN2	Mitofusin-2	mfn1a	Uncharacterized protein	12.1991	Contig5699	0.531735	6.70721	0.0105105	2.45355	4.7707	1.28e-14	2.52164	4.7707	2.81e-15
dd_Smed_v6_5946_0_1	SYNGR2	Synaptogyrin-2	Syngr2	Synaptogyrin-2	15.5373	Contig1892	1.80167	7.75163	0.00198308	2.16337	3.43383	9.66e-06	2.304	3.43383	2.81e-06
dd_Smed_v6_5951_0_1	NA	NA	NA	NA	20.4109	Contig3176	1.04875	8.71822	0.000656337	1.39397	4.91082	6.77e-07	1.0259	4.91082	0.000386226
dd_Smed_v6_597_0_1	NA	NA	NA	NA	724.449	Contig439	1.36896	10.7011	4.8e-05	5.73575	8.42709	2.94e-60	5.55571	8.42709	1.89e-57
dd_Smed_v6_5975_0_1	PPP2R2D	Serine/threonine-protein phosphatase 2A 55 kDa regulatory subunit B delta isoform	tws	Protein phosphatase PP2A 55 kDa regulatory subunit	19.0286	Contig5677	0.569641	7.52151	0.0176745	1.13758	5.26009	0.000138749	0.850552	5.26009	0.00652337
dd_Smed_v6_5993_0_1	NA	NA	NA	NA	17.0194	Contig6727	1.65858	7.63235	0.00348097	2.67722	3.78698	2.69e-09	2.55642	3.78698	1.52e-08
dd_Smed_v6_602_0_1	NPC2	Epididymal secretory protein E1	NPC2	Epididymal secretory protein E1	577.078	Contig6514	2.65434	11.078	0.000653169	1.0324	8.80245	0.000946274	0.807628	8.80245	0.0137796
dd_Smed_v6_6023_0_1	MORN4	MORN repeat-containing protein 4	Morn4	MORN repeat-containing protein 4	22.657	Contig7323	2.01511	7.44439	0.00152573	6.2767	3.59655	1.42e-21	6.30369	3.59655	1.19e-21
dd_Smed_v6_6039_0_1	CSK	Tyrosine-protein kinase CSK	Csk	Tyrosine-protein kinase CSK	16.2974	Contig7329	0.666053	7.66241	0.0121979	1.01991	5.03619	0.00257642	0.7694	5.03619	0.0322306
dd_Smed_v6_6044_0_1	GRTP1	Growth hormone-regulated TBC protein 1	GRTP1	Growth hormone-regulated TBC protein 1	6.46484	Contig3221	2.25441	9.05441	2.91e-05	2.98484	2.96827	2.63e-07	2.76773	2.96827	1.97e-06
dd_Smed_v6_6045_0_1	LNP	Protein lunapark	LNP	Protein lunapark	15.1407	Contig3120	1.11443	7.73137	0.000116017	1.98589	4.86315	4.64e-08	1.83497	4.86315	5.3e-07
dd_Smed_v6_6051_0_1	FAM109A	Sesquipedalian-1	FAM109A	Sesquipedalian-1	27.035	Contig3174	0.925561	7.52396	0.000636102	1.89601	4.56606	1.19e-07	1.71737	4.56606	1.97e-06
dd_Smed_v6_6053_1_1	NA	NA	NA	NA	35.4984	Contig4574	0.885288	7.30512	0.000425118	1.96473	3.42358	2.26e-06	1.78781	3.42358	2.03e-05
dd_Smed_v6_6055_0_1	ATRAID	All-trans retinoic acid-induced differentiation factor	Atraid	All-trans retinoic acid-induced differentiation factor	69.8047	Contig2869	1.71387	8.17073	7.25e-05	1.79835	5.89685	2.49e-09	1.64919	5.89685	5.68e-08
dd_Smed_v6_606_1_1	PGGHG	Protein-glucosylgalactosylhydroxylysine glucosidase	PGGHG	Protein-glucosylgalactosylhydroxylysine glucosidase	10.6798	Contig4077	0.585421	6.55634	0.00250977	1.10908	5.38466	8.48e-05	1.18283	5.38466	2.94e-05
dd_Smed_v6_607_0_1	NA	NA	NA	NA	49.9307	PL08008B2E06	1.02989	6.73643	0.00392329	2.59935	4.70899	1.14e-16	2.13247	4.70899	9.44e-12
dd_Smed_v6_608_0_1	NA	NA	NA	NA	64.1615	Contig1491	3.53764	10.4529	3.58e-05	7.94337	6.0483	5.12e-19	8.01806	6.0483	3.39e-19
dd_Smed_v6_610_0_1	RAC1	Ras-related C3 botulinum toxin substrate 1	Rac1	Ras-related C3 botulinum toxin substrate 1	73.084	Contig5482	0.998693	7.40532	0.00546311	1.0797	7.07131	0.00022211	0.932479	7.07131	0.00191513
dd_Smed_v6_6107_0_1	TMEM106A	Transmembrane protein 106A	Tmem106a	Transmembrane protein 106A	12.1543	PL04021A1B12	0.906154	7.96272	0.00416348	1.58803	3.53536	0.000564963	1.42893	3.53536	0.0024115
dd_Smed_v6_611_0_1	HEL70	Epididymis luminal protein 70	Moe	Moesin/ezrin/radixin homolog 1	63.4474	Contig1780	1.30282	9.35447	0.000645636	1.22049	7.25624	0.000141405	1.47743	7.25624	3.88e-06
dd_Smed_v6_6156_0_1	DOCK1	Dedicator of cytokinesis protein 1	DOCK1	Dedicator of cytokinesis protein 1	7.00881	Contig6189	0.768618	7.2533	0.023626	4.91705	5.57034	1.45e-42	4.83097	5.57034	2.19e-41
dd_Smed_v6_6176_1_1	PLEKHF2	Pleckstrin homology domain-containing family F member 2	PLEKHF2	Pleckstrin homology domain-containing family F member 2	7.83084	Contig2705	1.36989	8.55813	6.32e-05	2.33109	3.18177	3.11e-08	1.80745	3.18177	2.22e-05
dd_Smed_v6_619_0_1	ARPC3	Actin-related protein 2/3 complex subunit 3	Arpc3	Actin-related protein 2/3 complex subunit 3	51.1208	Contig32	1.29531	9.79434	0.000573876	1.84748	5.18954	0.00019915	1.74843	5.18954	0.000513908
dd_Smed_v6_623_0_1	ACTR2	Actin-related protein 2	Actr2	Actin-related protein 2	213.678	Contig701	1.39762	9.70131	4.45e-05	1.13607	8.38525	6.7e-05	1.00202	8.38525	0.000573086
dd_Smed_v6_6236_0_1	ADA	Adenosine deaminase	ada	Adenosine deaminase	10.7907	Contig3895	2.06107	8.24756	6.51e-05	1.92844	4.27119	3.08e-07	1.57087	4.27119	3.96e-05
dd_Smed_v6_6276_0_1	PTPMT1	Phosphatidylglycerophosphatase and protein-tyrosine phosphatase 1	CELE_F28C6.8	Uncharacterized protein	17.0846	Contig2508	1.05335	7.79633	0.00119848	2.20703	3.65118	0.000331144	1.79178	3.65118	0.00452213
dd_Smed_v6_6292_0_1	MTHFS	5-formyltetrahydrofolate cyclo-ligase	MTHFS	5-formyltetrahydrofolate cyclo-ligase	30.3394	Contig4755	0.781019	8.23325	0.000802347	1.11519	4.73306	7.39e-05	0.945091	4.73306	0.00106206
dd_Smed_v6_63_0_1	COTL1	Coactosin-like protein	COTL1	Coactosin-like protein	2997.84	Contig1384	2.60599	10.2085	8.78e-05	2.18884	10.9616	4.39e-09	2.09517	10.9616	2.29e-08
dd_Smed_v6_630_0_1	CHMP1B	Charged multivesicular body protein 1b	Chmp1	Charged multivesicular body protein 1, isoform A	159.322	Contig45	2.05977	10.2834	0.000101947	1.52418	7.03483	3.19e-06	1.41347	7.03483	1.91e-05
dd_Smed_v6_6305_0_1	MFSD11	UNC93-like protein MFSD11	Mfsd11	UNC93-like protein MFSD11	3.4938	PL05002B2G09	1.37103	7.72003	0.00259159	2.52378	2.41365	2.86e-05	2.72963	2.41365	7.02e-06
dd_Smed_v6_6309_0_1	GNPTAB	N-acetylglucosamine-1-phosphotransferase subunits alpha/beta	gnptab	N-acetylglucosamine-1-phosphotransferase subunits alpha/beta	3.41374	Contig2456	0.703722	6.76306	0.00138204	1.9909	3.50885	6.42e-07	2.0599	3.50885	2.94e-07
dd_Smed_v6_6343_0_1	NA	NA	NA	NA	11.1688	PL08010A1A04	0.77136	7.08925	0.0126609	1.29	5.08627	6.49e-05	1.03376	5.08627	0.00192383
dd_Smed_v6_636_0_1	APOB	Apolipoprotein B-100	Apoltp	Apolipoprotein lipid transfer particle	177.06	Contig6249	0.599804	7.97313	0.0476535	5.87168	10.8555	1.56e-57	5.48485	10.8555	4.19e-52
dd_Smed_v6_6387_0_1	LZTR1	Leucine-zipper-like transcriptional regulator 1	Lztr1	Leucine-zipper-like transcriptional regulator 1	5.17879	Contig3743	0.647392	6.93672	0.00137175	1.69096	3.17333	0.000132071	1.35525	3.17333	0.00298758
dd_Smed_v6_639_2_1	MAP3K3	Mitogen-activated protein kinase kinase kinase 3	map3k3	Mitogen-activated protein kinase kinase kinase 3	14.6188	Contig3109	0.661988	7.35175	0.00376642	1.39537	4.78061	0.000169469	0.988136	4.78061	0.0115663
dd_Smed_v6_6393_0_1	ABCB1	Multidrug resistance protein 1	Abcb1a	Multidrug resistance protein 1A	4.99311	PL05002B2A01	0.691827	6.90282	0.00445513	1.62228	4.40869	1.45e-07	1.37406	4.40869	1.12e-05
dd_Smed_v6_6418_0_1	UBC	Polyubiquitin-C	ubb	Zgc:172187 protein	5.1786	PL04004X1C01	0.793923	8.23847	0.00191492	1.38907	4.17424	0.000250549	1.37945	4.17424	0.000319082
dd_Smed_v6_6484_0_1	FAM172A	Protein FAM172A	Fam172a	Protein FAM172A	4.61123	Contig5440	0.6486	7.41595	0.00970444	1.18247	3.2764	0.00601029	0.977891	3.2764	0.0299716
dd_Smed_v6_6504_0_1	RALGAPA2	Ral GTPase-activating protein subunit alpha-2	RALGAPA2	Ral GTPase-activating protein subunit alpha-2	3.51237	PL08001B1A12	0.633854	7.0988	0.0421638	1.01932	4.60897	0.00321013	1.30768	4.60897	0.000124174
dd_Smed_v6_6529_0_1	GSS	Glutathione synthetase	gss	Glutathione synthetase	18.9191	Contig1945	0.887989	7.39463	0.000966331	1.21346	5.14274	0.00209246	1.10834	5.14274	0.00615638
dd_Smed_v6_653_0_1	DUSP6	Dual specificity protein phosphatase 6	Dusp6	Dual specificity protein phosphatase 6	35.233	Contig6205	2.13271	10.7274	0.000791488	2.05713	5.77857	3.65e-05	1.73302	5.77857	0.000627229
dd_Smed_v6_6537_0_1	OXR1	Oxidation resistance protein 1	Tldc2	TLD domain-containing protein 2	13.1714	Contig4875	0.845911	7.60453	0.00105068	2.19186	4.65517	4.58e-10	2.01283	4.65517	1.21e-08
dd_Smed_v6_6547_0_1	NA	NA	NA	NA	30.632	Contig1720	1.53611	7.98518	8.63e-05	6.98845	5.17175	5.89e-55	6.98522	5.17175	7.78e-55
dd_Smed_v6_6550_0_1	MOGAT2	2-acylglycerol O-acyltransferase 2	mogat2	Mogat2 protein	8.49259	Contig5997	0.807404	8.03794	0.0245874	3.61276	2.02063	1.62e-05	3.79499	2.02063	7.4e-06
dd_Smed_v6_6560_0_1	NA	NA	NA	NA	17.973	Contig7182	0.685576	6.20734	0.00484494	2.98368	3.23368	1.73e-06	2.97333	3.23368	2.17e-06
dd_Smed_v6_6578_0_1	DDR2	Discoidin domain-containing receptor 2	Ddr	Discoidin domain receptor, isoform F	13.9341	Contig3618	1.43013	7.25184	0.00039953	3.0718	5.45422	5.69e-23	3.05247	5.45422	1.11e-22
dd_Smed_v6_6580_0_1	NA	NA	NA	NA	8.06982	Contig7368	0.928826	7.41921	0.0151313	1.05718	4.00704	0.0150602	1.36923	4.00704	0.00133255
dd_Smed_v6_6588_0_1	RAB9B	Ras-related protein Rab-9B	RAB9B	Ras-related protein Rab-9B	20.235	Contig5949	2.7768	9.67828	0.00064886	7.05709	4.04267	1.57e-28	7.33574	4.04267	3.87e-30
dd_Smed_v6_6592_0_1	NA	NA	NA	NA	9.22676	PL08003A1D04	0.645963	6.63203	0.00523858	3.05622	2.02911	0.00258195	3.36063	2.02911	0.00108142
dd_Smed_v6_6619_0_1	TMC5	Transmembrane channel-like protein 5	Tmc4	Transmembrane channel-like protein 4	8.07759	Contig5514	1.99562	7.83619	9.8e-05	3.00509	2.79702	7.74e-08	2.82303	2.79702	4.84e-07
dd_Smed_v6_662_0_1	GPX4	Phospholipid hydroperoxide glutathione peroxidase, mitochondrial	GPX4	Phospholipid hydroperoxide glutathione peroxidase, mitochondrial	155.323	Contig6064	1.43293	11.0493	0.00184698	2.34184	7.20271	3.56e-16	2.17997	7.20271	3.26e-14
dd_Smed_v6_6627_0_1	STAMBPL1	AMSH-like protease	stambpb	STAM-binding protein b	8.74602	Contig6312	0.595659	6.97798	0.0404551	1.04174	3.74959	0.00685952	1.35504	3.74959	0.000338706
dd_Smed_v6_6663_0_1	SLC5A1	Sodium/glucose cotransporter 1	slc5a9	Sodium/glucose cotransporter 4	6.2806	PL05005B2B08	0.705551	7.14025	0.00578229	4.11358	3.67485	7.9e-25	3.56608	3.67485	1.56e-19
dd_Smed_v6_667_0_1	UBE2L3	Ubiquitin-conjugating enzyme E2 L3	ube2l3a	Ubiquitin-conjugating enzyme E2L 3	62.9582	Contig2721	0.462916	9.41399	0.0495401	1.3859	5.99874	4.1e-05	1.27397	5.99874	0.000201911
dd_Smed_v6_6676_0_1	NA	NA	NA	NA	29.5273	Contig2765	1.07172	7.99248	0.000202056	1.40731	4.64404	7.45e-05	1.72161	4.64404	1.19e-06
dd_Smed_v6_6677_0_1	FTH1	Ferritin	zgc:109934	Ferritin	34.2861	Contig3219	1.08635	8.68374	0.000592471	6.0672	4.8499	1.12e-42	5.95306	4.8499	1.9e-41
dd_Smed_v6_6687_0_1	NA	NA	NA	NA	33.169	Contig1524	1.77654	7.83809	0.00022185	6.2085	4.98921	1.12e-43	6.20347	4.98921	1.42e-43
dd_Smed_v6_6691_0_1	SLC15A4	Solute carrier family 15 member 4	SLC15A4	Solute carrier family 15 member 4	13.3116	Contig4894	0.537717	6.66812	0.0495716	1.98634	4.37289	6.72e-07	2.20675	4.37289	3.88e-08
dd_Smed_v6_6705_0_1	NA	NA	NA	NA	33.36	Contig6825	1.05873	7.57889	0.00772749	1.58048	4.30427	6.9e-05	1.63017	4.30427	4.56e-05
dd_Smed_v6_6714_0_1	NA	NA	NA	NA	26.543	Contig2377	1.12216	6.74687	0.00054994	4.79858	4.30227	3.76e-38	4.59306	4.30227	1.54e-35
dd_Smed_v6_6722_0_1	NA	NA	NA	NA	19.7502	Contig3751	1.30228	8.2615	0.000204618	1.94064	4.98872	2.16e-11	1.76785	4.98872	1.31e-09
dd_Smed_v6_6727_0_1	MGLL	Monoglyceride lipase	Mgll	Monoglyceride lipase	8.9504	Contig4864	1.90241	7.78797	7.81e-05	3.24223	3.23623	5.26e-09	3.21161	3.23623	8.47e-09
dd_Smed_v6_6768_0_1	TRAF3	TNF receptor-associated factor 3	traf3	TNF receptor-associated factor 3	7.79237	Contig1753	1.28178	7.03179	0.00214822	2.85941	3.80738	1.95e-10	3.24187	3.80738	9.24e-13
dd_Smed_v6_6785_1_1	NA	NA	NA	NA	20.4237	PL08005B1E10	1.96802	8.53004	0.000654081	7.32488	2.62545	8.52e-10	7.19674	2.62545	1.71e-09
dd_Smed_v6_6792_0_1	SLC31A1	High affinity copper uptake protein 1	slc31a1	High affinity copper uptake protein	34.67	Contig5836	1.8714	8.31881	9.96e-05	5.39819	4.77194	3.2e-51	5.34633	4.77194	1.95e-50
dd_Smed_v6_6796_0_1	MGLL	Monoglyceride lipase	Mgll	Monoglyceride lipase	6.79051	Contig4394	1.15093	7.43725	0.000232969	2.28152	2.80445	1.62e-06	2.23368	2.80445	3.06e-06
dd_Smed_v6_6819_0_1	A4GNT	Alpha-1,4-N-acetylglucosaminyltransferase	NA	NA	13.3801	Contig5956	1.34186	7.05424	0.00104761	5.29211	3.91143	5.03e-16	4.97695	3.91143	1.42e-14
dd_Smed_v6_683_0_1	NA	NA	NA	NA	110.913	Contig3806	1.18834	7.59238	0.00117248	1.73569	7.629	8.95e-07	1.45973	7.629	4.63e-05
dd_Smed_v6_6833_0_1	ADO	2-aminoethanethiol dioxygenase	adob	2-aminoethanethiol (cysteamine) dioxygenase b	10.5758	Contig5247	0.690124	7.97438	0.00572449	1.16467	3.95131	0.00178569	0.835876	3.95131	0.0357191
dd_Smed_v6_6837_0_1	NA	NA	Nudt17	Nucleoside diphosphate-linked moiety X motif 17	6.12479	Contig856	0.346817	6.58304	0.039912	1.44387	2.87028	0.00931125	1.32479	2.87028	0.0205134
dd_Smed_v6_684_0_1	ATP6V1B2	V-type proton ATPase subunit B, brain isoform	Vha55	V-type proton ATPase subunit B	144.173	Contig6462	2.30541	10.8691	0.000697745	1.54987	9.05401	2.01e-07	1.38341	9.05401	4.47e-06
dd_Smed_v6_6843_0_1	PLPP1	Phospholipid phosphatase 1	PLPP1	Phospholipid phosphatase 1	23.6832	Contig2908	0.675641	6.67171	0.0170576	1.88276	4.56555	5.06e-09	1.67067	4.56555	2.73e-07
dd_Smed_v6_6848_0_1	SLC29A1	Equilibrative nucleoside transporter 1	SLC29A1	Equilibrative nucleoside transporter 1	26.7004	Contig3863	1.14175	7.74397	0.000521131	2.20843	5.31897	5.05e-15	1.66594	5.31897	4.23e-09
dd_Smed_v6_6853_0_1	DDR1	Epithelial discoidin domain-containing receptor 1	smal	Uncharacterized protein, isoform C	4.63761	Contig2554	0.834461	7.12108	0.000355365	2.60106	3.5171	1.98e-10	2.47028	3.5171	1.72e-09
dd_Smed_v6_687_0_1	PPP2R1A	Serine/threonine-protein phosphatase 2A 65 kDa regulatory subunit A alpha isoform	PPP2R1A	Serine/threonine-protein phosphatase 2A 65 kDa regulatory subunit A alpha isoform	90.3039	PL06010A2H09	0.332249	6.37236	0.0303449	1.2424	7.82792	2.2e-05	1.13135	7.82792	0.000140479
dd_Smed_v6_6887_0_1	NRXN3	Neurexin-3	Crb1	Protein crumbs homolog 1	5.47738	Contig1460	0.602209	6.75474	0.00155932	1.07384	3.65826	0.0118496	1.31813	3.65826	0.0017576
dd_Smed_v6_690_0_1	argBPIB	ArgBPIB protein	argBPIB	ArgBPIB protein	550.042	Contig4439	2.10313	9.84913	5.24e-05	3.42891	8.87844	1.72e-28	3.27351	8.87844	2.5e-26
dd_Smed_v6_6917_0_1	SUSD2	Sushi domain-containing protein 2	Susd2	Sushi domain-containing protein 2	11.8102	PL06004B1C06	0.652062	7.02466	0.0131089	6.35703	4.55172	4.9e-52	6.16976	4.55172	1.13e-49
dd_Smed_v6_6928_0_1	PTPN4	Tyrosine-protein phosphatase non-receptor type 4	PTPN4	Tyrosine-protein phosphatase non-receptor type 4	6.48342	Contig4739	0.515202	6.65091	0.00776399	1.30361	4.71327	3.19e-05	0.981672	4.71327	0.00255727
dd_Smed_v6_6969_0_1	NA	NA	pck	EG:80H7.2 protein	8.65772	Contig4107	0.376019	6.94653	0.0292892	1.84077	3.60747	1.8e-05	1.43073	3.60747	0.00116054
dd_Smed_v6_6983_0_1	MAP3K3	Mitogen-activated protein kinase kinase kinase 3	map3k3	Mitogen-activated protein kinase kinase kinase 3	5.19185	Contig6955	1.02517	7.41776	0.00366843	1.54007	4.04726	4.59e-06	1.45466	4.04726	1.79e-05
dd_Smed_v6_699_0_1	AK3	GTP:AMP phosphotransferase AK3, mitochondrial	ak3	GTP:AMP phosphotransferase AK3, mitochondrial	166.319	Contig1038	1.20011	10.2865	0.00167305	1.66705	7.37227	3.71e-09	1.70751	7.37227	1.82e-09
dd_Smed_v6_6998_0_1	NA	NA	NA	NA	13.7803	PL030017A20F02	1.01227	6.89821	0.0035745	6.61001	3.60534	5.09e-27	6.65093	3.60534	3.1e-27
dd_Smed_v6_7000_0_1	GGACT	Gamma-glutamylaminecyclotransferase	GGACT	Gamma-glutamylaminecyclotransferase	8.48148	Contig2500	0.85389	7.39295	0.000913415	2.05451	2.62756	0.000199252	2.33997	2.62756	2.45e-05
dd_Smed_v6_7035_0_1	NA	NA	NA	NA	27.6717	Contig3682	1.13764	7.60041	0.000304577	1.85128	5.12668	4.64e-08	1.50851	5.12668	1.11e-05
dd_Smed_v6_7052_0_1	RAB5B	Ras-related protein Rab-5B	Rab5c	Ras-related protein Rab-5C	20.6256	Contig7318	1.64692	7.48865	0.00105817	2.37587	4.27178	1.01e-09	2.26348	4.27178	6.76e-09
dd_Smed_v6_7056_0_1	ACF	Apobec-1 complementation factor, isoform CRA_b	rbm47	RNA-binding motif protein 47	6.97073	PL06017A2G09	0.428593	6.79626	0.0324717	2.00479	3.87593	1.95e-06	2.45844	3.87593	6.18e-09
dd_Smed_v6_7058_0_1	SSH1	Protein phosphatase Slingshot homolog 1	Ssh1	Protein phosphatase Slingshot homolog 1	8.20316	PL05006A1C02	1.03527	7.06257	0.00246662	1.21966	4.37279	0.000434779	0.94844	4.37279	0.0088701
dd_Smed_v6_7072_0_1	TBC1D13	TBC1 domain family member 13	Tbc1d13	TBC1 domain family member 13	10.5454	Contig3342	1.46997	8.82926	0.000211758	2.02218	4.08602	4.45e-09	1.94189	4.08602	2.1e-08
dd_Smed_v6_7076_0_1	NA	NA	NA	NA	6.81439	Contig367	1.67906	7.03452	0.000589152	5.43658	2.90082	1.36e-07	5.77898	2.90082	3.58e-08
dd_Smed_v6_7077_0_1	MFSD12	Major facilitator superfamily domain-containing protein 12	mfsd12a	Major facilitator superfamily domain-containing 12a	2.91751	Contig722	1.7539	8.3487	7.58e-05	3.08427	2.3367	0.000813733	3.10163	2.3367	0.000875961
dd_Smed_v6_7096_0_1	LOXL2	Lysyl oxidase homolog 2	lox2	Lysyl oxidase-like 2	45.9551	PL06010A2D02	0.667332	6.42939	0.0357484	5.28263	6.02612	8.63e-44	5.17946	6.02612	1.8e-42
dd_Smed_v6_7098_0_1	MAOB	Amine oxidase [flavin-containing] B	MAOB	Amine oxidase [flavin-containing] B	11.3649	PL08003B2E03	1.22981	6.92414	0.00797825	2.4933	4.30185	3.39e-12	2.1249	4.30185	3.23e-09
dd_Smed_v6_7100_0_1	TMEM104	Transmembrane protein 104	CG5262	Transmembrane protein 104 homolog	18.7751	Contig3111	1.82005	8.39313	2.69e-05	3.51355	5.04084	6.38e-17	3.1702	5.04084	3.02e-14
dd_Smed_v6_7104_0_1	SLC26A11	Sodium-independent sulfate anion transporter	slc26a11	Solute carrier family 26 (anion exchanger), member 11	11.1686	Contig2366	1.55113	7.30983	0.000158442	2.05986	4.47841	1.23e-11	1.98363	4.47841	7.86e-11
dd_Smed_v6_7105_0_1	SNTB1	Beta-1-syntrophin	Sntb1	Beta-1-syntrophin	24.5164	PL06002X1A12	0.575181	7.35817	0.027938	2.26659	5.35553	7.05e-12	2.18988	5.35553	4e-11
dd_Smed_v6_7121_0_1	SLC24A5	Sodium/potassium/calcium exchanger 5	slc24a5	Sodium/potassium/calcium exchanger 5	24.7824	PL06017B2C01	0.712669	7.23183	0.00983567	6.0094	5.17555	6.14e-50	5.68007	5.17555	7.23e-46
dd_Smed_v6_7138_0_1	NA	NA	NA	NA	14.548	PL05001B1A02	0.810818	6.62761	0.00508752	1.19938	4.90772	0.000352029	0.981583	4.90772	0.00475768
dd_Smed_v6_7140_0_1	NA	NA	NA	NA	26.1145	Contig7103	0.730086	6.75001	0.0155662	2.99721	5.19048	2.7e-23	2.66607	5.19048	5.68e-19
dd_Smed_v6_7147_0_1	APRT	Adenine phosphoribosyltransferase	APRT	Adenine phosphoribosyltransferase	13.6804	Contig7116	0.507238	7.0021	0.0253911	2.07496	3.21094	0.00247618	2.16418	3.21094	0.00179001
dd_Smed_v6_7156_0_1	NA	NA	NA	NA	22.3248	Contig482	0.861358	6.75964	0.00154987	6.88308	3.91223	1.55e-34	6.78117	3.91223	9.73e-34
dd_Smed_v6_7165_0_1	NA	NA	NA	NA	10.5614	Contig6781	1.67931	8.20792	0.00255833	4.12993	3.35579	3.74e-11	4.109	3.35579	5.43e-11
dd_Smed_v6_7184_0_1	B4GALT2	Beta-1,4-galactosyltransferase 2	B4GALT2	Beta-1,4-galactosyltransferase 2	6.52549	Contig1939	0.787334	7.37384	0.00319896	2.41595	3.00789	3.55e-05	2.55304	3.00789	1.45e-05
dd_Smed_v6_7200_0_1	SAT2	Diamine acetyltransferase 2	sat1a.2	Spermidine/spermine N1-acetyltransferase 1	25.2018	Contig7555	2.12036	8.56539	0.00135022	2.49744	4.04725	2.26e-09	2.68099	4.04725	1.79e-10
dd_Smed_v6_7205_0_1	CIB2	Calcium and integrin-binding family member 2	Cib1	Calcium and integrin-binding protein 1	9.0141	Contig7485	1.76407	7.28218	0.00276543	10.5119	2.47293	3.08e-19	10.8952	2.47293	2.23e-20
dd_Smed_v6_722_0_1	LAMP1	Lysosome-associated membrane glycoprotein 1	Lamp1	Lysosome-associated membrane glycoprotein 1	243.4	Contig1891	2.07491	9.93527	2.88e-05	1.76137	7.8762	1.14e-09	1.60856	7.8762	3.36e-08
dd_Smed_v6_7289_0_1	NA	NA	CG10527	Uncharacterized protein	27.9435	Contig7290	0.559614	7.49084	0.0122673	1.93457	5.29979	5.05e-12	1.69636	5.29979	1.77e-09
dd_Smed_v6_7337_0_1	VPS33B	Vacuolar protein sorting-associated protein 33B	vps33b	Vacuolar protein sorting-associated protein 33B	8.62334	PL05002B1G10	0.664258	7.44894	0.0158511	0.84475	4.43119	0.0206068	1.19957	4.43119	0.000688274
dd_Smed_v6_7338_0_1	NA	NA	NA	NA	25.7022	Contig452	2.35073	8.28137	3.48e-05	3.76077	4.80595	1.92e-23	3.88428	4.80595	1.08e-24
dd_Smed_v6_7339_0_1	NA	NA	CELE_Y59A8B.21	Uncharacterized protein	11.8696	PL08003A2C11	1.64353	9.01224	0.000712733	3.09845	4.25577	5.78e-10	3.08087	4.25577	8.47e-10
dd_Smed_v6_734_0_1	NA	NA	unc-9	Innexin unc-9	379.908	Contig5492	2.30357	9.31091	8.01e-05	6.57201	9.12644	6.12e-69	6.33712	9.12644	2.01e-65
dd_Smed_v6_7359_0_1	LAMC1	Laminin subunit gamma-1	Lamc1	Laminin subunit gamma-1	2.10026	PL08001A2F12	0.722695	7.53414	0.014268	3.6066	3.34358	2.65e-15	3.68558	3.34358	8.33e-16
dd_Smed_v6_736_0_1	NA	NA	NA	NA	119.877	Contig253	1.55778	11.37	0.000165687	6.32258	6.93159	6.39e-35	6.48445	6.93159	3.74e-36
dd_Smed_v6_7367_0_1	PI4K2A	Phosphatidylinositol 4-kinase type 2-alpha	pi4k2b	Phosphatidylinositol 4-kinase type 2-beta	10.2477	Contig6934	0.630902	6.94313	0.00639863	2.17912	3.85686	1.62e-07	1.55751	3.85686	0.000239488
dd_Smed_v6_7369_0_1	GLTPD1	Ceramide-1-phosphate transfer protein	GLTPD1	Ceramide-1-phosphate transfer protein	33.7052	Contig2633	1.76557	8.88228	0.000106873	1.86019	5.10028	4.94e-10	1.9805	5.10028	3.99e-11
dd_Smed_v6_7407_0_1	ZFYVE1	Zinc finger FYVE domain-containing protein 1	mKIAA1589	MKIAA1589 protein	10.7225	Contig4387	0.392535	7.20693	0.0143755	1.03318	4.79481	0.00469422	0.608582	4.79481	0.136913
dd_Smed_v6_7411_0_1	NA	NA	NA	NA	15.939	Contig3181	0.621034	7.30578	0.00339815	1.98567	4.36957	1.63e-06	2.20471	4.36957	1.16e-07
dd_Smed_v6_743_0_1	-	PLAC8 protein	Plac8	Placenta-specific gene 8 protein	514.437	Contig671	2.15808	10.7229	4.56e-05	1.60679	8.61653	4.07e-08	1.48481	8.61653	4.93e-07
dd_Smed_v6_7447_0_1	SLC6A1	Sodium- and chloride-dependent GABA transporter 1	SerT	Sodium-dependent serotonin transporter	16.7425	Contig1620	1.17055	7.05691	0.000575358	4.12773	4.86891	2.42e-35	3.5353	4.86891	2.44e-27
dd_Smed_v6_7461_0_1	NA	NA	NA	NA	19.483	Contig2310	1.65755	7.37957	0.000300316	2.26511	4.95742	2.37e-16	2.30454	4.95742	8.02e-17
dd_Smed_v6_7485_0_1	NA	NA	NA	NA	5.22957	PL05001B1F07	0.286145	7.00646	0.047486	1.86733	2.86573	6.6e-05	1.10525	2.86573	0.0279213
dd_Smed_v6_749_0_1	PLS3	Plastin-3	Fim	FI19014p1	91.6145	Contig5904	2.00683	8.78279	0.000711681	2.05941	7.70694	3.46e-11	2.06909	7.70694	3.33e-11
dd_Smed_v6_75_0_1	NA	NA	CG3884	RE21371p	20860.5	Contig1248	4.49447	13.1958	2.29e-05	6.4837	13.5841	5.97e-46	6.38976	13.5841	5.67e-45
dd_Smed_v6_7534_0_1	NA	NA	NA	NA	8.35983	PL030009B10H11	0.677276	7.04223	0.0107059	2.69131	3.6644	3.27e-13	2.49293	3.6644	1.58e-11
dd_Smed_v6_7565_0_1	PRKAG3	5'-AMP-activated protein kinase subunit gamma-3	prkag1	Protein kinase, AMP-activated, gamma 1 non-catalytic subunit	28.7372	PL06014B1H03	0.453731	7.08182	0.0194377	4.05664	5.42413	2.4e-35	3.83064	5.42413	3.59e-32
dd_Smed_v6_7577_0_1	PDE4D	Phosphodiesterase	pde4ca	Phosphodiesterase	25.7805	Contig2158	2.4586	8.3259	2.78e-05	6.51195	5.62251	5.64e-54	6.25194	5.62251	7.75e-51
dd_Smed_v6_7587_0_1	CBR4	Carbonyl reductase family member 4	zgc:92630	Zgc:92630	26.7802	Contig6069	1.62135	8.03957	0.000823031	5.69176	4.48763	1.81e-25	5.7274	4.48763	1.15e-25
dd_Smed_v6_762_0_1	GLIPR2	Golgi-associated plant pathogenesis-related protein 1	CG31482	Uncharacterized protein	125.668	Contig4276	1.48575	8.59289	0.000221149	2.20762	7.64164	1.75e-11	1.965	7.64164	2.44e-09
dd_Smed_v6_7766_0_1	SULT1C4	Sulfotransferase 1C4	sult1st5	Sulfotransferase	19.614	Contig4860	0.423389	7.12203	0.0294233	3.63375	4.67196	8.08e-30	3.68314	4.67196	1.8e-30
dd_Smed_v6_777_0_1	NA	NA	NA	NA	66.8903	Contig2798	2.78822	9.5208	4.21e-05	5.45296	5.65611	4.96e-31	5.86977	5.65611	1.53e-34
dd_Smed_v6_7790_0_1	NA	NA	NA	NA	26.7102	Contig327	1.32448	8.159	0.000745474	2.71654	4.75207	1.57e-19	2.22257	4.75207	1.08e-13
dd_Smed_v6_7803_0_1	ABHD12	Monoacylglycerol lipase ABHD12	abhd12	Monoacylglycerol lipase ABHD12	19.5405	Contig3050	2.12487	8.11258	6.06e-05	3.54697	4.70793	4.05e-34	3.35167	4.70793	5.94e-31
dd_Smed_v6_781_0_1	ARPC5L	Actin-related protein 2/3 complex subunit 5-like protein	arpc5lb	Actin-related protein 2/3 complex subunit 5	62.8515	Contig6978	1.46489	10.6936	0.000960571	1.58315	5.50774	1.73e-05	1.36011	5.50774	0.000286742
dd_Smed_v6_783_0_1	NA	NA	NA	NA	17.0047	Contig1681	1.28041	6.956	0.00276302	1.87663	3.6018	0.00666848	1.55626	3.6018	0.0304488
dd_Smed_v6_784_0_1	ATOX1	Copper transport protein ATOX1	cuc-1	CU (Copper) Chaperonin	132.476	Contig142	1.60186	9.33507	0.000432266	2.6092	6.92388	1.6e-18	2.75444	6.92388	2.72e-20
dd_Smed_v6_7847_0_1	SLC46A3	Solute carrier family 46 member 3	SLC46A3	Solute carrier family 46 member 3	7.67376	Contig2006	1.38736	7.38628	7.5e-05	2.50536	3.75606	9.48e-10	1.85695	3.75606	6.91e-06
dd_Smed_v6_785_0_1	CTSA	Lysosomal protective protein	CTSA	Lysosomal protective protein	397.162	Contig613	2.73343	10.4184	2.72e-05	1.40177	9.36864	3.12e-05	1.26234	9.36864	0.000222252
dd_Smed_v6_7852_0_1	CLN8	Protein CLN8	CLN8	Protein CLN8	19.7013	Contig2332	2.42516	7.65285	0.000114078	5.45346	4.12234	2.32e-39	5.36043	4.12234	2.65e-38
dd_Smed_v6_786_0_1	PNP	Purine nucleoside phosphorylase	Pnp	Purine nucleoside phosphorylase	169.497	Contig5010	1.18466	10.2629	0.00037656	2.30059	7.95056	1.92e-16	2.23113	7.95056	1.6e-15
dd_Smed_v6_7861_0_1	ANK3	Ankyrin-3	sowah	Sosondowah, isoform J	23.6055	Contig5413	0.683286	7.85584	0.00271075	2.18597	4.45569	3.57e-08	2.15559	4.45569	6.32e-08
dd_Smed_v6_787_0_1	PAK4	Serine/threonine-protein kinase PAK 4	mbt	Serine/threonine-protein kinase PAK mbt	33.6742	Contig6555	0.815624	9.63107	0.0228549	1.84962	5.38754	2.67e-09	1.79004	5.38754	1.01e-08
dd_Smed_v6_7893_0_1	NA	NA	NA	NA	3.3555	Contig4210	1.34784	7.32439	0.000714056	2.72172	2.71393	7.86e-06	3.19473	2.71393	2.12e-07
dd_Smed_v6_7894_0_1	NA	NA	NA	NA	6.19412	Contig1465	1.13136	7.3743	0.000967827	2.27656	4.11331	2.89e-10	2.13958	4.11331	3.6e-09
dd_Smed_v6_7946_0_1	NLGN4X	Neuroligin-4, X-linked	nlgn4b	Neuroligin 4b	4.61961	PL04002X1H12	0.324868	7.41806	0.0452134	1.7545	3.43333	0.000712971	1.4219	3.43333	0.00809603
dd_Smed_v6_797_0_1	NA	NA	NA	NA	269.664	Contig3259	1.27743	10.2058	0.000130299	1.85276	8.71774	1.03e-10	1.55888	8.71774	6.93e-08
dd_Smed_v6_7979_0_1	RAB43	Ras-related protein Rab-43	CELE_K02E10.1	Uncharacterized protein	21.3145	Contig44	1.81457	7.64612	5.53e-05	5.43175	3.90321	1.77e-40	5.58088	3.90321	2.87e-42
dd_Smed_v6_8029_0_1	PHYHD1	Phytanoyl-CoA dioxygenase domain-containing protein 1	PHYHD1	Phytanoyl-CoA dioxygenase domain-containing protein 1	11.3016	Contig5922	1.42591	7.56464	0.0184137	4.41527	3.55555	1.66e-12	4.37091	3.55555	3.04e-12
dd_Smed_v6_8071_0_1	MPC2	Mitochondrial pyruvate carrier 2	mpc2	Mitochondrial pyruvate carrier	17.4402	Contig4429	1.43555	8.71329	9.45e-05	1.61221	3.61192	0.000850778	1.77796	3.61192	0.00024787
dd_Smed_v6_81_0_1	CTSB	Cathepsin B	Ctsb	Cathepsin B	945.863	Contig6244	4.34252	12.9149	0.00104043	3.13538	10.3293	2.93e-18	2.98814	10.3293	8.41e-17
dd_Smed_v6_8118_0_1	COQ3	Ubiquinone biosynthesis O-methyltransferase, mitochondrial	CH211-31O18.2-001	Novel protein	36.4011	Contig2598	1.23416	7.36627	0.000152027	2.28644	5.27988	2.66e-12	1.90319	5.27988	6.62e-09
dd_Smed_v6_8252_0_1	LHX1	LIM/homeobox protein Lhx1	LHX1	LIM/homeobox protein Lhx1	16.9515	Contig4742	1.8281	6.88132	0.00215235	7.18732	4.62379	3.13e-49	7.0674	4.62379	5.52e-48
dd_Smed_v6_8255_0_1	ARAP1	Arf-GAP with Rho-GAP domain, ANK repeat and PH domain-containing protein 1	Arap1	Arf-GAP with Rho-GAP domain, ANK repeat and PH domain-containing protein 1	9.07542	Contig3820	1.13507	7.15576	0.000530466	1.49529	5.05681	2.55e-07	1.40888	5.05681	1.47e-06
dd_Smed_v6_8300_0_1	CDKL3	Cyclin-dependent kinase-like 3	CDKL3	Cyclin-dependent kinase-like 3	255.895	PL05006A2G05	2.22571	9.09934	0.000712282	4.70228	5.91701	1.69e-38	4.47214	5.91701	1.45e-35
dd_Smed_v6_8301_0_1	NA	NA	NA	NA	9.0225	Contig4448	1.31678	7.47955	0.00050119	1.14885	3.38523	0.0123703	1.58282	3.38523	0.000414701
dd_Smed_v6_833_0_1	ATP6V0A1	V-type proton ATPase 116 kDa subunit a isoform 1	Vha100-1	V-type proton ATPase subunit a	108.26	Contig5624	2.13197	9.70473	0.000382073	2.80689	8.27337	3.31e-23	2.57272	8.27337	6.7e-20
dd_Smed_v6_8331_0_1	NA	NA	NA	NA	8.71346	PL05001A1F05	1.7966	7.45209	0.000958743	2.54355	3.91181	1.51e-11	2.34793	3.91181	5.14e-10
dd_Smed_v6_8349_0_1	PLA2G6	85/88 kDa calcium-independent phospholipase A2	Pla2g6	85/88 kDa calcium-independent phospholipase A2	5.70388	Contig3926	0.692924	6.77563	0.00172526	2.23338	4.05735	6.97e-10	1.78955	4.05735	9.68e-07
dd_Smed_v6_835_0_1	SNX2	Sorting nexin-2	Snx2	Sorting nexin-2	41.2849	Contig4400	1.595	9.22114	8.88e-05	1.79034	6.12963	1.1e-10	1.6516	6.12963	3.26e-09
dd_Smed_v6_8373_0_1	FLVCR2	Feline leukemia virus subgroup C receptor-related protein 2	Mfsd7	Major facilitator superfamily domain-containing protein 7	16.751	PL04024A2F05	0.595797	7.04278	0.00589864	6.57018	4.45101	1.26e-38	6.25568	4.45101	7.23e-36
dd_Smed_v6_8378_0_1	BSCL2	Seipin	bscl2	Berardinelli-Seip congenital lipodystrophy 2 (seipin)	5.86727	Contig1298	0.57842	7.35251	0.00310504	1.77768	2.8652	0.000497978	2.17015	2.8652	2.11e-05
dd_Smed_v6_8379_0_1	NA	NA	NA	NA	8.65894	Contig5586	2.00788	7.76327	5.14e-05	2.55424	3.45798	2.52e-06	2.31682	3.45798	2.23e-05
dd_Smed_v6_838_0_1	REEP6	Receptor expression-enhancing protein 6	Reep6	Receptor expression-enhancing protein 6	203.909	Contig7501	1.37623	10.8147	0.00333909	2.1405	7.73888	1.4e-13	1.89697	7.73888	6.22e-11
dd_Smed_v6_8385_0_1	NA	NA	NA	NA	7.57987	Contig939	1.26383	7.92413	0.000609252	2.55334	2.82626	2.09e-06	2.85591	2.82626	1.38e-07
dd_Smed_v6_8407_0_1	SIDT2	SID1 transmembrane family member 2	Sidt1	SID1 transmembrane family member 1	5.95352	PL06019B2E12	0.794424	6.62811	0.00741141	1.9391	3.88825	9.77e-06	1.94122	3.88825	1.1e-05
dd_Smed_v6_8422_0_1	FUCA2	Plasma alpha-L-fucosidase	Fuca2	Plasma alpha-L-fucosidase	14.6646	PL05010A1G12	0.787288	6.75549	0.0305443	3.05078	4.45249	6.09e-13	3.2827	4.45249	1.54e-14
dd_Smed_v6_8448_0_1	CD163	Scavenger receptor cysteine-rich type 1 protein M130	bark	Protein bark beetle	2.31544	Contig2369	0.61407	7.34254	0.00673969	1.0955	4.59078	0.000997061	0.860745	4.59078	0.0136828
dd_Smed_v6_8479_0_1	NA	NA	NA	NA	26.2673	PL030017B20C10	0.474304	6.26964	0.0182224	5.4929	5.14042	5.85e-40	5.55137	5.14042	1.4e-40
dd_Smed_v6_8505_0_1	PGLYRP1	Peptidoglycan recognition protein 1	PGRP-LE	Peptidoglycan-recognition protein LE	4.05703	Contig4774	1.51371	8.19236	6.18e-05	2.11131	3.32681	0.00915311	2.91458	3.32681	0.000327446
dd_Smed_v6_8560_0_1	ABCG2	ATP-binding cassette sub-family G member 2	w	Protein white	15.2082	Contig3459	1.63483	7.99675	7.29e-05	6.17628	4.93724	1.47e-48	6.3913	4.93724	4.69e-51
dd_Smed_v6_8591_0_1	DHCR7	7-dehydrocholesterol reductase	dhcr7	7-dehydrocholesterol reductase	14.1354	Contig1308	0.727415	6.7821	0.045701	3.9878	4.43856	3.41e-23	3.75403	4.43856	5.79e-21
dd_Smed_v6_862_0_1	NA	NA	NA	NA	113.025	Contig1625	2.63747	9.40537	0.000106484	3.92562	6.76787	7.06e-26	3.73002	6.76787	8.47e-24
dd_Smed_v6_864_0_1	ARF1	ADP-ribosylation factor 1	Arf1	ADP-ribosylation factor 1	161.039	Contig3270	1.18422	10.4213	0.000238587	1.70486	7.02619	1.96e-06	1.61828	7.02619	7.59e-06
dd_Smed_v6_8653_0_1	DNM2	Dynamin-2	dnm2a	Dynamin 2	9.01342	Contig4008	0.715125	7.34549	0.00115046	1.88841	4.06429	8.02e-07	1.39551	4.06429	0.000368313
dd_Smed_v6_867_0_1	RAB11B	Ras-related protein Rab-11B	rab11ba	RAB11B, member RAS oncogene family, a	119.111	Contig1193	1.73574	9.92027	8.5e-05	1.6557	7.29255	1.13e-09	1.54545	7.29255	1.64e-08
dd_Smed_v6_87_0_1	NA	NA	CG10527	Uncharacterized protein	3152.14	Contig239	3.73983	12.2126	2.64e-05	3.73357	10.9895	7.87e-30	3.61254	10.9895	3.15e-28
dd_Smed_v6_870_0_1	FKBP15	FK506-binding protein 15	FKBP15	FK506-binding protein 15	93.2689	Contig5392	0.556743	6.32339	0.0284209	1.71453	8.49882	1.22e-07	1.71338	8.49882	1.45e-07
dd_Smed_v6_8719_0_1	NA	NA	NA	NA	10.4925	Contig4004	1.25636	7.06836	0.000435664	3.12457	4.01852	1.57e-13	3.15832	4.01852	1.03e-13
dd_Smed_v6_8735_0_1	TBCK	TBC domain-containing protein kinase-like protein	TBCK	TBC domain-containing protein kinase-like protein	11.9966	Contig4786	0.820086	8.17957	0.00101075	0.986593	5.26997	0.00198933	1.00923	5.26997	0.00174263
dd_Smed_v6_8746_0_1	CELA1	Chymotrypsin-like elastase family member 1	zgc:112302	Zgc:112302	24.6712	Contig3685	0.991733	7.25033	0.0127698	6.7454	4.99967	1.24e-62	6.50639	4.99967	3.1e-59
dd_Smed_v6_8766_0_1	ACMSD	2-amino-3-carboxymuconate-6-semialdehyde decarboxylase	Acmsd	2-amino-3-carboxymuconate-6-semialdehyde decarboxylase	12.3605	Contig3102	0.575236	7.01782	0.0110564	5.86497	3.89204	2.38e-23	5.76667	3.89204	1e-22
dd_Smed_v6_878_0_1	RTN4	Reticulon-4	rtn1a	Reticulon	142.135	Contig20	1.86018	8.81138	0.000162171	2.08492	7.27794	3.63e-11	1.99022	7.27794	3.09e-10
dd_Smed_v6_8783_0_1	NA	NA	NA	NA	3.26284	Contig761	1.94161	6.58807	0.000167385	1.4101	2.85693	0.00929587	1.37655	2.85693	0.0128404
dd_Smed_v6_8853_0_1	NA	NA	NA	NA	20.3952	Contig4254	1.85641	7.40338	0.000170051	6.1448	5.395	1.48e-63	6.18921	5.395	5.78e-64
dd_Smed_v6_8868_0_1	MON1A	Vacuolar fusion protein MON1 homolog A	mon1bb	MON1 secretory-trafficking family member Bb	3.75523	Contig5636	0.775665	7.09714	0.00070311	1.531	2.84251	0.00424531	1.41933	2.84251	0.00969115
dd_Smed_v6_8882_0_1	NA	NA	NA	NA	20.1853	Contig1818	1.4612	7.59574	0.000518824	3.78386	3.49998	1.5e-15	3.35775	3.49998	9.51e-13
dd_Smed_v6_8886_0_1	ELF3	ETS-related transcription factor Elf-3	elf3	E74-like factor 3 (ets domain transcription factor, epithelial-specific )	6.99117	Contig4890	0.666711	6.85306	0.00453161	1.66577	2.95152	0.00380727	2.48199	2.95152	1.32e-05
dd_Smed_v6_896_0_1	GLUL	Glutamine synthetase	Gs2	Glutamine synthetase 2 cytoplasmic	58.1008	Contig3804	2.12253	11.4997	0.000140314	1.49064	6.88755	3.58e-07	1.45252	6.88755	8.49e-07
dd_Smed_v6_8996_0_1	DYNC1H1	Cytoplasmic dynein 1 heavy chain 1	Dhc64C	Dynein heavy chain, cytoplasmic	4.6193	Contig2842	1.48373	7.82145	0.000100984	2.67012	5.97407	2.47e-19	2.67497	5.97407	2.38e-19
dd_Smed_v6_9028_0_1	KCNK1	Potassium channel subfamily K member 1	kcnk6	Potassium channel, subfamily K, member 6	9.30472	Contig2970	1.2003	7.09863	0.000353556	2.04343	3.85809	1.88e-09	1.59807	3.85809	3.54e-06
dd_Smed_v6_9051_0_1	SLC16A9	Monocarboxylate transporter 9	CG8389	CG8389, isoform A	12.7892	Contig3367	0.978951	6.94911	0.00200371	3.21513	4.14645	2.67e-16	3.60462	4.14645	1.12e-19
dd_Smed_v6_907_0_1	MAT2A	S-adenosylmethionine synthase isoform type-2	Mat2a	S-adenosylmethionine synthase isoform type-2	71.4678	Contig5554	0.898233	10.4472	0.00229143	3.96432	7.46582	3.81e-29	4.12981	7.46582	4.77e-31
dd_Smed_v6_912_0_1	VPS26B	Vacuolar protein sorting-associated protein 26B	Vps26b	Vacuolar protein sorting-associated protein 26B	47.614	Contig3508	1.85858	8.78526	3.8e-05	2.30642	6.14072	3.63e-13	1.92709	6.14072	1.38e-09
dd_Smed_v6_913_0_1	RAC1	Ras-related C3 botulinum toxin substrate 1	Rac1	Ras-related C3 botulinum toxin substrate 1	115.711	Contig485	2.22896	9.07467	8.92e-05	3.25705	6.86166	1.37e-22	3.04344	6.86166	4.19e-20
dd_Smed_v6_9144_0_1	TPCN2	Two pore calcium channel protein 2	Tpcn2	Two pore calcium channel protein 2	3.39758	Contig4557	0.975247	7.38017	0.000491617	3.2191	2.94317	1.88e-06	3.3307	2.94317	1e-06
dd_Smed_v6_9150_0_1	RAB5B	Ras-related protein Rab-5B	rab-6.2	Ras-related protein Rab-6.2	13.8094	Contig6797	1.29004	7.40852	0.00218683	6.30066	3.36453	4.75e-30	5.78392	3.36453	2.82e-26
dd_Smed_v6_9208_0_1	ABCC2	Canalicular multispecific organic anion transporter 1	Abcc3	Canalicular multispecific organic anion transporter 2	2.7668	Contig2314	0.535532	6.27213	0.0191231	2.15017	3.77189	3.69e-07	1.58721	3.77189	0.000230398
dd_Smed_v6_9232_0_1	MGAT2	Alpha-1,6-mannosyl-glycoprotein 2-beta-N-acetylglucosaminyltransferase	Mgat2	Alpha-1,6-mannosyl-glycoprotein beta-1,2-N-acetylglucosaminyltransferase	14.1412	Contig4888	0.488181	7.49619	0.0214987	1.59354	4.64172	2.14e-07	1.14465	4.64172	0.00029059
dd_Smed_v6_926_1_1	NA	NA	NA	NA	175.863	Contig5443	1.28424	9.95141	0.00032566	1.42138	6.65568	4.01e-05	1.36727	6.65568	9.31e-05
dd_Smed_v6_927_1_1	FLOT2	Flotillin-2	Flo2	Flotillin-2	39.3884	Contig5209	0.388593	7.61309	0.0453838	1.00508	6.431	0.00081527	0.887999	6.431	0.0040404
dd_Smed_v6_9277_0_1	-	Dct1	-	Dct1	13.7659	Contig5646	0.374611	7.83278	0.0161202	2.02167	4.82368	3.84e-09	1.71841	4.82368	6.94e-07
dd_Smed_v6_929_0_1	AVIL	Advillin	Gel	Gelsolin	181.166	Contig4707	0.867501	8.68141	0.0300244	1.62283	8.17093	5.76e-08	1.49935	8.17093	6.65e-07
dd_Smed_v6_9317_0_1	RNF31	E3 ubiquitin-protein ligase RNF31	LUBEL	Uncharacterized protein, isoform I	14.1664	Contig4776	0.769668	6.39844	0.0121112	4.17925	4.24988	4.95e-12	4.46264	4.24988	3.26e-13
dd_Smed_v6_9329_0_1	LIMK1	LIM domain kinase 1	Limk1	LIM domain kinase 1	6.84568	Contig4627	1.23266	7.04315	0.000150064	2.71896	3.32219	1.24e-08	2.66113	3.32219	2.88e-08
dd_Smed_v6_934_0_1	RER1	RER1 retention in endoplasmic reticulum 1 homolog (S. cerevisiae), isoform CRA_a	rer1	RER1 homolog	107.67	PL03019A2G03	0.950382	9.43992	0.0109433	2.33579	6.23412	7.82e-14	2.04339	6.23412	6.56e-11
dd_Smed_v6_9357_0_1	ABCC1	Multidrug resistance-associated protein 1	Abcc1	Multidrug resistance-associated protein 1	4.90826	Contig3426	1.65478	7.57834	5.66e-05	3.83218	4.49415	3.37e-25	3.83571	4.49415	3.27e-25
dd_Smed_v6_945_0_1	NA	NA	NA	NA	114.015	PL05004B2C08	1.6886	8.8024	0.00607449	1.66559	7.57464	2.24e-09	1.71973	7.57464	7.87e-10
dd_Smed_v6_9472_0_1	NA	NA	NA	NA	4.20906	Contig3696	0.962551	6.60082	0.0185994	4.45937	1.84858	1.2e-05	4.33738	1.84858	2.23e-05
dd_Smed_v6_9513_0_1	SLC47A1	Multidrug and toxin extrusion protein 1	Slc47a1	Multidrug and toxin extrusion protein 1	10.037	PL06023A1A07	0.469829	6.41788	0.00899291	5.59787	4.11342	2.02e-25	5.43665	4.11342	2.73e-24
dd_Smed_v6_9523_0_1	USP8	Ubiquitin carboxyl-terminal hydrolase 8	Usp2	SD04280p	3.92111	Contig7204	1.09113	7.17051	0.00267067	2.60226	2.1844	0.00134294	3.42136	2.1844	3.2e-05
dd_Smed_v6_959_0_1	ATP6V1A	V-type proton ATPase catalytic subunit A	Vha68-2	V-type proton ATPase catalytic subunit A isoform 2	53.3865	PL06011B1G03	1.14196	8.17761	0.00739798	2.10311	6.83376	3.77e-14	2.02696	6.83376	3.36e-13
dd_Smed_v6_960_0_1	TXNRD3	Thioredoxin reductase 3	txnrd1	Thioredoxin reductase 1	46.1232	Contig1040	0.736703	7.97551	0.0126262	1.12048	6.76219	0.000856263	1.07887	6.76219	0.00159697
dd_Smed_v6_9669_0_1	PRKACB	cAMP-dependent protein kinase catalytic subunit beta	PRKACB	cAMP-dependent protein kinase catalytic subunit beta	3.63701	Contig3929	1.34916	7.2039	0.000642536	10.2075	1.8031	1.17e-18	9.84487	1.8031	1.84e-17
dd_Smed_v6_973_0_1	ENPP4	Bis(5'-adenosyl)-triphosphatase ENPP4	ENPP4	Bis(5'-adenosyl)-triphosphatase ENPP4	32.2912	Contig5060	2.89041	10.7353	2.61e-05	1.78899	5.75357	9.01e-08	1.58989	5.75357	2.52e-06
dd_Smed_v6_974_0_1	TRAF4	TNF receptor-associated factor 4	Traf4	TNF receptor-associated factor 4	67.2143	Contig4200	2.22278	9.00773	7.82e-05	2.22497	6.80433	7.34e-14	2.11536	6.80433	1.25e-12
dd_Smed_v6_978_0_1	ARPC1A	Actin-related protein 2/3 complex subunit 1A	Arpc1a	Actin-related protein 2/3 complex subunit 1A	320.024	Contig3501	1.34058	10.3365	7.6e-05	1.17311	8.98103	0.000119006	1.0297	8.98103	0.000961674
dd_Smed_v6_9785_0_1	SDR16C5	Epidermal retinol dehydrogenase 2	sdr16c5a	Short chain dehydrogenase/reductase family 16C, member 5a	5.31645	Contig304	0.420327	7.5081	0.01737	2.21844	2.55209	0.000187679	2.39643	2.55209	6.16e-05
dd_Smed_v6_9789_0_1	B3GALT5	Beta-1,3-galactosyltransferase 5	B3GALT5	Beta-1,3-galactosyltransferase 5	8.36666	Contig2097	0.873355	7.79627	0.00270842	2.23122	3.20518	1.03e-06	2.0755	3.20518	6.41e-06
dd_Smed_v6_9793_0_1	NA	NA	NA	NA	11.6913	Contig2138	0.649873	7.35334	0.00524457	2.44426	3.9352	1.84e-07	2.2357	3.9352	2.12e-06
dd_Smed_v6_9866_0_1	GGACT	Gamma-glutamylaminecyclotransferase	CG2811	Putative gamma-glutamylcyclotransferase CG2811	5.00469	Contig7458	2.59183	8.33863	0.00113425	5.46972	1.60416	2.2e-06	5.18469	1.60416	7.03e-06
dd_Smed_v6_994_0_1	PANK2	Pantothenate kinase 2, mitochondrial	Pank3	Pantothenate kinase 3	413.202	Contig3785	1.71671	8.1132	0.00109325	4.25673	9.05269	3.99e-40	4.13577	9.05269	2.63e-38

## Sheet: F2SD1-C. Phagocytes_358_mod
geneID	uniprot_id_human	uniprot_desc_human	uniprot_id_all5best	uniprot_desc_all5best	gut_mean_tpm	EST_ID	phagocyte_log2FC	phagocyte_avgExpr	phagocyte_FDR	logFC_medial	logCPM_medial	FDR_medial	logFC_lateral	logCPM_lateral	FDR_lateral
dd_Smed_v6_10_1_1	COLEC10	Collectin-10	zgc:172053	Zgc:172053	21305.6	Contig4399	-0.119826	12.7967	0.697142	4.57657	13.7949	7.67e-30	4.82941	13.7949	2.55e-32
dd_Smed_v6_10051_0_1	STRA6	Stimulated by retinoic acid gene 6 protein homolog	stra6l	STRA6-like	4.97769	PL08004A2G12	0.433905	6.35905	0.296496	4.2524	3.29572	2.95e-13	4.24516	3.29572	3.67e-13
dd_Smed_v6_10103_0_1	RREB1	Ras-responsive element-binding protein 1	rreb1a	Ras-responsive element-binding protein 1a	3.12641	Contig7148	-0.0947495	6.30142	0.465758	1.5458	2.52489	0.00475282	2.04319	2.52489	0.000156812
dd_Smed_v6_10167_0_1	STXBP2	Syntaxin-binding protein 2	STXBP2	Syntaxin-binding protein 2	8.0273	Contig4564	-0.140489	6.34882	0.496675	1.27288	4.07807	0.00218316	1.86112	4.07807	5.2e-06
dd_Smed_v6_10182_0_1	PGAP2	Post-GPI attachment to proteins factor 2	CG7990	Post-GPI attachment to proteins factor 2-like	7.72661	Contig4671	0.0709514	7.95	0.641983	1.89942	2.98133	0.00497426	2.15291	2.98133	0.0015123
dd_Smed_v6_1019_0_1	SYNJ1	Synaptojanin-1	Synj2	Synaptojanin-2	101.585	Contig4519	-0.233035	9.46069	0.132048	1.58993	7.24766	7.06e-07	0.838511	7.24766	0.0149782
dd_Smed_v6_1020_0_1	PHKG1	Phosphorylase b kinase gamma catalytic chain, skeletal muscle/heart isoform	PhKgamma	Phosphorylase kinase gamma, isoform F	126.544	Contig6368	0.222103	6.54409	0.124817	1.90464	7.84876	9.95e-11	1.76752	7.84876	2.36e-09
dd_Smed_v6_1026_0_1	ACSBG2	Long-chain-fatty-acid--CoA ligase ACSBG2	Acsbg2	Long-chain-fatty-acid--CoA ligase ACSBG2	95.4964	Contig4874	-0.121091	8.44206	0.584169	1.24476	7.83478	0.000324098	1.03221	7.83478	0.00391336
dd_Smed_v6_10397_0_1	PAQR3	Progestin and adipoQ receptor family member 3	paqr3b	Progestin and adipoQ receptor family member IIIb	26.5685	Contig6707	0.530233	7.09574	0.118336	1.62781	4.87701	3.24e-07	1.29147	4.87701	6.99e-05
dd_Smed_v6_1045_0_1	EEF1B2	Elongation factor 1-beta	EEF1B2	Elongation factor 1-beta	150.84	Contig4222	0.127195	8.29864	0.476044	1.04516	6.49642	0.0168328	1.14304	6.49642	0.00933379
dd_Smed_v6_10744_0_1	PM20D2	Peptidase M20 domain-containing protein 2	PM20D2	Peptidase M20 domain-containing protein 2	19.2925	PL05004A1H06	0.43033	7.15893	0.0520456	3.32286	4.70666	1.48e-17	3.00139	4.70666	9.11e-15
dd_Smed_v6_10855_0_1	NA	NA	NA	NA	10.1449	PL06023A2H08	0.474219	6.73724	0.0594049	3.60243	3.92235	1.35e-07	3.35557	3.92235	9.13e-07
dd_Smed_v6_1088_0_1	TGFBI	Transforming growth factor-beta-induced protein ig-h3	TGFBI	Transforming growth factor-beta-induced protein ig-h3	65.396	PL06010A1C04	0.058081	6.63381	0.687523	5.78955	7.29847	5.2e-57	5.73917	7.29847	3.24e-56
dd_Smed_v6_11025_0_1	PXMP4	Peroxisomal membrane protein 4	PXMP4	Peroxisomal membrane protein 4	13.4562	Contig2841	0.101414	7.60902	0.549102	1.0717	3.93911	0.00529554	0.898121	3.93911	0.025202
dd_Smed_v6_11093_0_1	NA	NA	NA	NA	12.7224	Contig6386	0.401799	7.24296	0.066101	1.935	3.92449	1.13e-07	2.18244	3.92449	2.4e-09
[truncated: 343 more rows]

## Sheet: F2SD1-D. Phagocytes_59_low
geneID	uniprot_id_human	uniprot_desc_human	uniprot_id_all5best	uniprot_desc_all5best	gut_mean_tpm	EST_ID	phagocyte_log2FC	phagocyte_avgExpr	phagocyte_FDR	logFC_medial	logCPM_medial	FDR_medial	logFC_lateral	logCPM_lateral	FDR_lateral
[truncated: 59 more rows]

[truncated: 2 more sheets: F2SD1-E. Smedv6_EST_Mapping, LEGEND]
