# Supplementary material for: Cell-type diversity and regionalized gene expression in the planarian intestine
Source: eLife. 2020 Apr 2;9:e52613. doi: 10.7554/eLife.52613 (PMC7117911; doi:10.7554/eLife.52613)
Supplement: Figure 6—source data 2. — (F6SD2-A) 62 intestine-enriched transcripts (LCM) that were upregulated or downregulated in response to shift to static culture in Arnold et al. (2016). (F6SD2-B) 99 intestine-enriched transcripts (LCM) that were upregulated in response to pathogenic bacteria ingestion in Abnave et al. (2014). [file elife-52613-fig6-data2.xlsx]

## Sheet: F6SD2-A. Arnold_2016_v_1844_gut
smed.v6.ID	smed20140614.ID	smed.v6.length	smed20140614.length	alignment.length.nt	percent.identity	evalue
dd_Smed_v6_10923_0_1	SMED30030413	958	845	845	100	0
dd_Smed_v6_1093_0_1	SMED30031208	761	761	761	100	0
dd_Smed_v6_1127_0_1	SMED30003448	1272	1103	975	99.487	0
dd_Smed_v6_1162_0_1	SMED30018560	471	379	374	99.733	0
dd_Smed_v6_12821_0_1	SMED30012784	1395	1322	1322	99.773	0
dd_Smed_v6_12848_0_1	SMED30012357	513	304	304	99.671	7.12e-158
dd_Smed_v6_12877_0_1	SMED30015244	1213	1185	1183	99.831	0
dd_Smed_v6_1296_0_1	SMED30027621	718	688	553	90.416	0
dd_Smed_v6_13270_0_1	SMED30034358	1179	1070	1070	100	0
dd_Smed_v6_13694_0_1	SMED30025582	897	790	791	98.736	0
dd_Smed_v6_14241_0_1	SMED30030533	1188	761	666	87.838	0
dd_Smed_v6_14332_0_1	SMED30027506	413	348	342	100	0
dd_Smed_v6_14593_0_1	SMED30026141	2380	2364	2363	100	0
dd_Smed_v6_15204_0_1	SMED30016800	966	993	962	99.584	0
dd_Smed_v6_16447_0_1	SMED30005203	920	912	852	98.122	0
dd_Smed_v6_1659_0_1	SMED30034004	1182	1300	1180	100	0
dd_Smed_v6_1680_0_1	SMED30014491	1759	1788	1736	100	0
dd_Smed_v6_1708_0_1	SMED30024583	426	252	168	99.405	2.32e-82
dd_Smed_v6_17481_0_1	SMED30010860	591	496	496	100	0
dd_Smed_v6_1785_0_1	SMED30008762	654	579	579	99.309	0
dd_Smed_v6_18077_0_1	SMED30034421	1097	1123	1056	99.053	0
dd_Smed_v6_20353_0_1	SMED30013291	1577	1659	1471	99.524	0
dd_Smed_v6_214_0_1	SMED30033336	785	645	199	100	2.2e-101
dd_Smed_v6_2212_0_1	SMED30016094	693	800	614	100	0
dd_Smed_v6_2311_0_1	SMED30034385	1025	1024	1023	99.902	0
dd_Smed_v6_2559_0_1	SMED30016695	981	959	920	100	0
dd_Smed_v6_2582_1_1	SMED30008066	764	943	712	94.382	0
dd_Smed_v6_2775_0_1	SMED30019982	1449	1400	1403	99.786	0
dd_Smed_v6_2929_0_1	SMED30025368	854	845	834	99.88	0
dd_Smed_v6_3194_0_1	SMED30015243	2682	2414	2414	99.917	0
dd_Smed_v6_3638_0_1	SMED30012694	1642	1211	714	99.72	0
dd_Smed_v6_388_0_1	SMED30000459	2562	2381	2368	99.789	0
dd_Smed_v6_3891_0_1	SMED30018303	674	578	578	99.827	0
dd_Smed_v6_3983_0_1	SMED30019231	1068	1058	1041	99.328	0
dd_Smed_v6_4290_0_1	SMED30034376	2018	1999	2000	99.7	0
dd_Smed_v6_4390_0_1	SMED30029291	686	707	667	100	0
dd_Smed_v6_4571_0_1	SMED30021721	1409	285	154	99.351	4.47e-75
dd_Smed_v6_4598_0_1	SMED30033685	1250	1783	702	99.858	0
dd_Smed_v6_4729_0_1	SMED30033225	822	618	566	87.633	0
dd_Smed_v6_5339_0_1	SMED30031474	2459	2511	2438	99.713	0
dd_Smed_v6_5552_0_1	SMED30015116	1181	1186	1154	99.133	0
dd_Smed_v6_5660_0_1	SMED30001068	2332	2316	2314	100	0
dd_Smed_v6_6247_0_1	SMED30002940	629	465	348	100	0
dd_Smed_v6_6831_0_1	SMED30020600	1520	1488	1488	99.933	0
dd_Smed_v6_6869_0_1	SMED30029687	702	660	660	99.545	0
dd_Smed_v6_7149_0_1	SMED30010732	439	417	363	100	0
dd_Smed_v6_7200_0_1	SMED30019281	683	683	683	100	0
dd_Smed_v6_7241_0_1	SMED30031985	2050	1683	1581	99.747	0
dd_Smed_v6_7295_0_1	SMED30018561	1228	1262	1207	95.36	0
dd_Smed_v6_7683_0_1	SMED30014580	810	1544	766	100	0
dd_Smed_v6_7766_0_1	SMED30035138	1392	1339	1338	100	0
dd_Smed_v6_7796_0_1	SMED30012450	2570	1686	912	99.013	0
dd_Smed_v6_7852_0_1	SMED30019291	978	1012	973	100	0
dd_Smed_v6_8029_0_1	SMED30028588	1143	1041	1032	99.903	0
dd_Smed_v6_8266_0_1	SMED30033261	1007	1004	1000	100	0
dd_Smed_v6_8373_0_1	SMED30015925	1437	1420	1420	100	0
dd_Smed_v6_8505_0_1	SMED30024286	2534	2517	2517	100	0
dd_Smed_v6_888_0_1	SMED30006949	886	913	866	100	0
dd_Smed_v6_8886_0_1	SMED30002579	1104	1071	1071	100	0
dd_Smed_v6_896_0_1	SMED30029103	1923	1624	1429	100	0
dd_Smed_v6_9208_0_1	SMED30027178	4872	5109	4401	99.909	0
dd_Smed_v6_991_0_1	SMED30010881	618	792	620	97.258	0

## Sheet: F6SD2-B. Abnave_2014_v_1844_gut
smed.v6.ID	dugesia.seq.ID	smed.v6.length	dugesia.sequence.length	alignment.length.aa	percent.identity	evalue
dd_Smed_v6_101_0_1	seq19313	502	289	73	75.342	1.99e-36
dd_Smed_v6_1020_0_1	seq29540	1786	262	63	49.206	4.32e-16
dd_Smed_v6_1022_0_1	seq75812	736	406	133	33.083	7.33e-22
dd_Smed_v6_10397_0_1	seq53353	1041	469	152	69.079	1.23e-73
dd_Smed_v6_1067_0_1	seq73139	536	331	67	91.045	1.02e-37
dd_Smed_v6_1090_0_1	seq37934	410	445	69	56.522	2.54e-23
dd_Smed_v6_11287_0_1	seq67777	1206	246	81	92.593	3.56e-47
dd_Smed_v6_1133_0_1	seq74381	379	362	66	86.364	1.75e-34
dd_Smed_v6_115_0_1	seq28749	614	427	100	50	1.49e-29
dd_Smed_v6_1296_0_1	seq43670	718	498	128	46.875	7.65e-35
dd_Smed_v6_1311_0_1	seq75907	553	410	83	68.675	4.24e-35
dd_Smed_v6_132_0_1	seq45055	433	319	91	36.264	9.5e-18
dd_Smed_v6_13292_0_1	seq43361	2444	597	162	59.877	4.01e-72
dd_Smed_v6_13694_0_1	seq26246	897	318	102	55.882	1.55e-31
dd_Smed_v6_1401_0_1	seq10360	690	531	72	76.389	6.95e-52
dd_Smed_v6_1553_0_1	seq74086	515	353	60	56.667	9.19e-30
dd_Smed_v6_160_0_1	seq73037	497	328	63	82.54	7.16e-47
dd_Smed_v6_1649_0_1	seq20536	1043	247	27	66.667	0.000149
dd_Smed_v6_17_0_1	seq39593	644	248	21	95.238	1.17e-05
dd_Smed_v6_1776_0_1	seq37274	520	355	81	65.432	6.57e-31
dd_Smed_v6_1799_0_1	seq20431	583	400	66	50	2.06e-19
dd_Smed_v6_1835_0_1	seq65946	420	230	68	98.529	9.5e-41
dd_Smed_v6_1904_0_1	seq35443	1767	202	47	61.702	2.98e-14
dd_Smed_v6_1938_0_1	seq28670	863	682	146	59.589	1.44e-59
dd_Smed_v6_1939_0_1	seq68851	1488	258	76	77.632	4.22e-32
dd_Smed_v6_1981_0_1	seq21936	1119	511	45	84.444	2.16e-40
dd_Smed_v6_2097_0_1	seq13673	601	484	48	60.417	4.2e-23
dd_Smed_v6_2098_0_1	seq70193	506	276	64	76.563	6e-35
dd_Smed_v6_214_0_1	seq69278	785	263	71	83.099	1.21e-36
dd_Smed_v6_2196_0_1	seq78376	612	523	135	78.519	4.62e-72
dd_Smed_v6_2235_0_1	seq78459	2530	529	148	87.162	1.04e-89
dd_Smed_v6_2257_0_1	seq30920	2300	212	16	87.5	1.62e-05
dd_Smed_v6_229_0_1	seq8515	519	415	44	61.364	1.22e-20
dd_Smed_v6_2490_0_1	seq22723	725	211	46	60.87	9.15e-15
dd_Smed_v6_25_0_1	seq46375	597	253	31	67.742	3.11e-09
dd_Smed_v6_2501_0_1	seq75772	1121	405	134	76.866	9.27e-65
dd_Smed_v6_2559_0_1	seq15805	981	338	46	78.261	3.21e-19
dd_Smed_v6_271_0_1	seq36195	632	427	63	68.254	1.01e-42
dd_Smed_v6_2741_0_1	seq27596	702	265	58	89.655	1.84e-33
dd_Smed_v6_2743_0_1	seq63463	2635	208	69	76.812	2.37e-31
dd_Smed_v6_2795_0_1	seq59540	771	354	67	85.075	2.53e-35
dd_Smed_v6_28_0_1	seq66881	320	238	68	47.059	3.98e-17
dd_Smed_v6_2804_0_1	seq15833	815	278	37	94.595	5.18e-17
dd_Smed_v6_300_0_1	seq1015	395	232	50	60	1.15e-18
dd_Smed_v6_3013_0_1	seq71207	539	293	80	78.75	3.82e-32
dd_Smed_v6_3108_0_1	seq12272	695	413	74	56.757	3.12e-23
dd_Smed_v6_314_0_1	seq68758	389	257	65	40	9.9e-15
dd_Smed_v6_32_0_1	seq32495	611	503	106	83.019	1.72e-52
dd_Smed_v6_3200_0_1	seq73936	806	350	83	51.807	5.71e-23
dd_Smed_v6_3308_0_1	seq64585	610	217	72	70.833	6.15e-29
dd_Smed_v6_3375_0_1	seq33489	4203	527	37	35.135	0.000132
dd_Smed_v6_3552_0_1	seq70671	441	284	38	92.105	3.84e-28
dd_Smed_v6_3687_0_1	seq173	2231	290	33	63.636	4.35e-23
dd_Smed_v6_3713_0_1	seq75736	933	404	124	89.516	1.69e-75
dd_Smed_v6_3839_0_1	seq61002	2246	450	63	88.889	1.93e-60
dd_Smed_v6_3903_0_1	seq80513	1248	702	212	74.057	3.05e-110
dd_Smed_v6_391_0_1	seq27324	407	424	79	72.152	8.36e-35
dd_Smed_v6_4054_0_1	seq46123	575	236	50	72	1.27e-19
dd_Smed_v6_4148_0_1	seq33532	1542	505	42	45.238	5.51e-11
dd_Smed_v6_423_0_1	seq70454	501	280	74	63.514	1.48e-29
dd_Smed_v6_4270_0_1	seq69919	760	272	90	63.333	4.98e-37
dd_Smed_v6_4411_0_1	seq10404	552	539	153	66.667	1.07e-69
dd_Smed_v6_4414_0_1	seq10097	451	442	79	50.633	3.74e-20
dd_Smed_v6_4478_0_1	seq12956	449	518	75	89.333	2.27e-39
dd_Smed_v6_463_0_1	seq64826	373	220	52	73.077	3.53e-26
dd_Smed_v6_479_0_1	seq33799	555	562	44	45.455	3.74e-08
dd_Smed_v6_4927_0_1	seq80627	858	716	130	66.923	1.04e-93
dd_Smed_v6_4936_0_1	seq10689	595	524	97	71.134	3.46e-50
dd_Smed_v6_5009_0_1	seq70367	725	279	87	91.954	8.33e-55
dd_Smed_v6_5021_0_1	seq5210	697	239	32	53.125	4.66e-07
dd_Smed_v6_5067_0_1	seq75868	973	408	89	84.27	3.49e-69
dd_Smed_v6_509_0_1	seq40371	359	365	61	52.459	1.19e-17
dd_Smed_v6_545_0_1	seq75041	486	381	84	75	2.68e-42
dd_Smed_v6_5480_0_1	seq56662	665	324	91	75.824	2.97e-47
dd_Smed_v6_5595_0_1	seq70877	640	288	95	68.421	6.96e-40
dd_Smed_v6_564_0_1	seq75742	660	404	106	75.472	1.23e-48
dd_Smed_v6_5872_0_1	seq77474	811	475	137	61.314	3.53e-42
dd_Smed_v6_5886_0_1	seq58977	1248	645	149	74.497	2.32e-107
dd_Smed_v6_607_1_1	seq65419	811	225	74	74.324	8.29e-36
dd_Smed_v6_619_0_1	seq72764	704	322	105	90.476	2.53e-61
dd_Smed_v6_6346_0_1	seq64157	632	214	53	41.509	2.06e-08
dd_Smed_v6_6380_0_1	seq69030	954	260	70	55.714	1.76e-21
dd_Smed_v6_6653_0_1	seq74990	663	380	54	72.222	1.77e-29
dd_Smed_v6_71_0_1	seq47153	441	312	80	62.5	2.38e-33
dd_Smed_v6_72_0_1	seq29236	327	333	79	60.759	8.19e-31
dd_Smed_v6_726_0_1	seq13757	793	826	75	68	2.98e-32
dd_Smed_v6_7289_0_1	seq28689	1381	583	71	46.479	1.13e-24
dd_Smed_v6_73_0_1	seq31707	540	972	150	76.667	6.16e-78
dd_Smed_v6_736_0_1	seq73672	1152	343	107	81.308	4.83e-60
dd_Smed_v6_743_0_1	seq75478	727	395	117	87.179	3.42e-73
dd_Smed_v6_783_0_1	seq10565	703	412	57	38.596	2.44e-08
dd_Smed_v6_784_0_1	seq75036	952	381	73	87.671	3.84e-35
dd_Smed_v6_819_0_1	seq71159	536	292	27	48.148	3.21e-10
dd_Smed_v6_862_0_1	seq68774	1042	257	85	83.529	1.3e-42
dd_Smed_v6_8979_0_1	seq71391	794	296	89	69.663	2.83e-44
dd_Smed_v6_9275_0_1	seq39446	1953	475	88	51.136	2.78e-19
dd_Smed_v6_9566_0_1	seq62591	3118	202	52	65.385	1.57e-17
dd_Smed_v6_991_0_1	seq73206	618	332	68	64.706	8.08e-23
dd_Smed_v6_993_0_1	seq33921	639	501	40	47.5	6.59e-05

## Sheet: LEGEND
Figure 6–source data 2. LCM intestine-enriched Transcripts in Innate Immunity Studies.
Worksheet		Legend
F6SD2-A		62 intestine-enriched transcripts up- or down-regulated in Arnold, eLife, 2016. dd_Smed_v6 associations with SMED transcripts based on highest BLASTN similarity.
F6SD2-B		99 intestine-enriched transcripts upregulated in Abnave et al., Cell Host Microbe, 2014. dd_Smed_v6 associations with D. japonica transcripts based on highest TBLASTX similarity.
Columns		A	dd_smed_v6 ID
		B	Query ID (either Dugesia japonica in S3A and S3B or SMED_20140614 in S3C and S3D)
		C	Length of the smed.v6 transcript
		D	Length of the query transcript
		E	Alignment length of query to dd_smed_v6 (TBLASTX in S3A and S3B is amino acid length, BLASTN in S3C and S3D is nucleotide length)
		F	Percent identical
		G	E-value of BLAST hit
