# Supplementary material for: Cell-type diversity and regionalized gene expression in the planarian intestine
Source: eLife. 2020 Apr 2;9:e52613. doi: 10.7554/eLife.52613 (PMC7117911; doi:10.7554/eLife.52613)
Supplement: Figure 7—source data 1. — (F7SD1-A) Human tissue enrichment for 699 human RBH homologs of planarian transcripts enriched in the planarian intestine. Data from Uhlén et al. (2015) reprinted with permission from AAAS. (F7SD1-B) Human tissue enrichment for all 5561 human RBH homologs of planarian transcripts. Data from Uhlén et al. (2015) reprinted with permission from AAAS. (F7SD1-C) Summary of tissue-specific enrichment for human RBH homologs of planarian transcripts. (F7SD1-D) Global summary of group enriched, tissue enriched, and tissue enhanced transcripts for human RBH homologs of planarian transcripts. (F7SD1-E) Best TBLASTX hits for planarian vs. human transcripts. (F7SD1-F) Best TBLASTX hits for human vs. planarian transcripts (reciprocal BLAST). (F7SD1-G) 5583 planarian transcripts with human RBH homologs. (F7SD1-H) 700 intestine-enriched planarian transcripts with human RBH homologs. [file elife-52613-fig7-data1.xlsx]

## Sheet: F7SD1-A. HPA_results_699_gut
dd_Smed_v6_ID	UniProtKB_ID	ensg_id	description	display_name	category	elevated_tissues
dd_Smed_v6_10002_0_1	Q9UJJ9	ENSG00000090581	N-acetylglucosamine-1-phosphate transferase, gamma subunit	GNPTG	Expressed in all tissues
dd_Smed_v6_1002_0_1	Q00796	ENSG00000140263	sorbitol dehydrogenase	SORD	Group enriched	kidney,liver,prostate,thyroid gland
dd_Smed_v6_10051_0_1	Q9BX79	ENSG00000137868	stimulated by retinoic acid 6	STRA6	Tissue enhanced	placenta
dd_Smed_v6_10070_0_1	Q9UNA1	ENSG00000145819	Rho GTPase activating protein 26	ARHGAP26	Expressed in all tissues
dd_Smed_v6_1009_0_1	Q9NUP9	ENSG00000148943	lin-7 homolog C (C. elegans)	LIN7C	Expressed in all tissues
dd_Smed_v6_101_0_1	O95925	ENSG00000101448	epididymal peptidase inhibitor	EPPIN	Tissue enriched	testis
dd_Smed_v6_101_0_1	O95925	ENSG00000249139	EPPIN-WFDC6 readthrough	EPPIN-WFDC6	Tissue enriched	testis
dd_Smed_v6_1020_0_1	P15735	ENSG00000156873	phosphorylase kinase, gamma 2 (testis)	PHKG2	Expressed in all tissues
dd_Smed_v6_1026_0_1	Q5FVE4	ENSG00000130377	acyl-CoA synthetase bubblegum family member 2	ACSBG2	Tissue enriched	testis
dd_Smed_v6_10262_0_1	Q96MV1	ENSG00000152078	transmembrane protein 56	TMEM56	Tissue enhanced	liver
dd_Smed_v6_10310_0_1	Q9UG56	ENSG00000241878	phosphatidylserine decarboxylase	PISD	Expressed in all tissues
dd_Smed_v6_10355_0_1	P78417	ENSG00000148834	glutathione S-transferase omega 1	GSTO1	Expressed in all tissues
dd_Smed_v6_10364_0_1	Q6UWP2	ENSG00000108272	dehydrogenase/reductase (SDR family) member 11	DHRS11	Group enriched	colon,duodenum,rectum,small intestine
dd_Smed_v6_1037_0_1	Q13637	ENSG00000118508	RAB32, member RAS oncogene family	RAB32	Expressed in all tissues
dd_Smed_v6_10397_0_1	Q6TCH7	ENSG00000163291	progestin and adipoQ receptor family member III	PAQR3	Expressed in all tissues
dd_Smed_v6_1048_0_1	Q8TED4	ENSG00000134955	solute carrier family 37 (glucose-6-phosphate transporter), member 2	SLC37A2	Tissue enhanced	salivary gland
dd_Smed_v6_1053_0_1	Q6ZNF0	ENSG00000183760	Iron/zinc purple acid phosphatase-like protein	PAPL	Tissue enhanced	skin, tonsil
dd_Smed_v6_10591_0_1	Q9Y4K0	ENSG00000134013	lysyl oxidase-like 2	LOXL2	Mixed
dd_Smed_v6_1060_0_1	P54886	ENSG00000059573	aldehyde dehydrogenase 18 family, member A1	ALDH18A1	Expressed in all tissues
dd_Smed_v6_1065_0_1	Q14677	ENSG00000113282	clathrin interactor 1	CLINT1	Expressed in all tissues
dd_Smed_v6_10667_0_1	Q06203	ENSG00000128059	phosphoribosyl pyrophosphate amidotransferase	PPAT	Expressed in all tissues
dd_Smed_v6_1067_0_1	O75787	ENSG00000182220	ATPase, H+ transporting, lysosomal accessory protein 2	ATP6AP2	Expressed in all tissues
dd_Smed_v6_10724_0_1	Q8NHS3	ENSG00000164073	major facilitator superfamily domain containing 8	MFSD8	Expressed in all tissues
dd_Smed_v6_10744_0_1	Q8IYS1	ENSG00000146281	peptidase M20 domain containing 2	PM20D2	Expressed in all tissues
dd_Smed_v6_1079_0_1	Q86T03	ENSG00000165782	transmembrane protein 55B	TMEM55B	Expressed in all tissues
dd_Smed_v6_11025_0_1	Q9Y6I8	ENSG00000101417	peroxisomal membrane protein 4, 24kDa	PXMP4	Expressed in all tissues
dd_Smed_v6_11197_0_1	Q5VZY2	ENSG00000203805	phosphatidic acid phosphatase type 2 domain containing 1A	PPAPDC1A	Group enriched	bone marrow,brain,gallbladder,kidney,testis
dd_Smed_v6_1123_0_1	Q9UHL4	ENSG00000176978	dipeptidyl-peptidase 7	DPP7	Expressed in all tissues
dd_Smed_v6_11252_0_1	Q14678	ENSG00000107104	KN motif and ankyrin repeat domains 1	KANK1	Expressed in all tissues
dd_Smed_v6_1127_0_1	Q14749	ENSG00000124713	glycine N-methyltransferase	GNMT	Group enriched	liver,pancreas
dd_Smed_v6_11287_0_1	P22676	ENSG00000172137	calbindin 2	CALB2	Tissue enhanced	adipose tissue, testis
dd_Smed_v6_1130_0_1	Q13530	ENSG00000132824	serine incorporator 3	SERINC3	Expressed in all tissues
dd_Smed_v6_1133_0_1	O94817	ENSG00000145782	autophagy related 12	ATG12	Expressed in all tissues
dd_Smed_v6_11330_0_1	Q12908	ENSG00000125255	solute carrier family 10 (sodium/bile acid cotransporter), member 2	SLC10A2	Group enriched	duodenum,kidney,small intestine
dd_Smed_v6_11404_0_1	Q12981	ENSG00000113734	BCL2/adenovirus E1B 19kDa interacting protein 1	BNIP1	Expressed in all tissues
dd_Smed_v6_1148_0_1	Q9HB07	ENSG00000139637	chromosome 12 open reading frame 10	C12orf10	Expressed in all tissues
dd_Smed_v6_1156_0_1	Q96GC9	ENSG00000062716	vacuole membrane protein 1	VMP1	Expressed in all tissues
dd_Smed_v6_1158_0_1	Q9NZZ3	ENSG00000086065	charged multivesicular body protein 5	CHMP5	Expressed in all tissues
dd_Smed_v6_11586_0_1	Q96H72	ENSG00000165915	solute carrier family 39 (zinc transporter), member 13	SLC39A13	Expressed in all tissues
dd_Smed_v6_1165_0_1	P47756	ENSG00000077549	capping protein (actin filament) muscle Z-line, beta	CAPZB	Expressed in all tissues
dd_Smed_v6_11653_0_1	Q92832	ENSG00000165973	NEL-like 1 (chicken)	NELL1	Tissue enhanced	brain, kidney
dd_Smed_v6_11660_0_1	P54253	ENSG00000124788	ataxin 1	ATXN1	Expressed in all tissues
dd_Smed_v6_1167_0_1	P42574	ENSG00000164305	caspase 3, apoptosis-related cysteine peptidase	CASP3	Expressed in all tissues
dd_Smed_v6_11714_0_1	O75469	ENSG00000144852	nuclear receptor subfamily 1, group I, member 2	NR1I2	Group enriched	colon,duodenum,gallbladder,liver,rectum,small intestine
dd_Smed_v6_11741_0_1	O75752	ENSG00000169255	beta-1,3-N-acetylgalactosaminyltransferase 1 (globoside blood group)	B3GALNT1	Mixed
dd_Smed_v6_11914_0_1	P18405	ENSG00000145545	steroid-5-alpha-reductase, alpha polypeptide 1 (3-oxo-5 alpha-steroid delta 4-dehydrogenase alpha 1)	SRD5A1	Mixed
dd_Smed_v6_12010_0_1	O14753	ENSG00000172818	ovo-like zinc finger 1	OVOL1	Tissue enhanced	esophagus
dd_Smed_v6_1204_0_1	Q13541	ENSG00000187840	eukaryotic translation initiation factor 4E binding protein 1	EIF4EBP1	Expressed in all tissues
dd_Smed_v6_122_1_1	P38571	ENSG00000107798	lipase A, lysosomal acid, cholesterol esterase	LIPA	Expressed in all tissues
dd_Smed_v6_12376_0_1	Q7Z402	ENSG00000170537	transmembrane channel-like 7	TMC7	Tissue enhanced	testis
dd_Smed_v6_12523_0_1	Q63HM1	ENSG00000183077	arylformamidase	AFMID	Expressed in all tissues
dd_Smed_v6_1255_0_1	P21283	ENSG00000155097	ATPase, H+ transporting, lysosomal 42kDa, V1 subunit C1	ATP6V1C1	Expressed in all tissues
dd_Smed_v6_12558_0_1	Q96Q05	ENSG00000167632	trafficking protein particle complex 9	TRAPPC9	Expressed in all tissues
dd_Smed_v6_12626_0_1	Q96A29	ENSG00000181830	solute carrier family 35 (GDP-fucose transporter), member C1	SLC35C1	Expressed in all tissues
dd_Smed_v6_12821_0_1	Q9UDX3	ENSG00000133488	SEC14-like 4 (S. cerevisiae)	SEC14L4	Group enriched	bone marrow,liver,lung,testis
dd_Smed_v6_1297_0_1	P12955	ENSG00000124299	peptidase D	PEPD	Expressed in all tissues
dd_Smed_v6_1315_0_1	P38117	ENSG00000105379	electron-transfer-flavoprotein, beta polypeptide	ETFB	Expressed in all tissues
dd_Smed_v6_13164_0_1	Q15392	ENSG00000116133	24-dehydrocholesterol reductase	DHCR24	Expressed in all tissues
dd_Smed_v6_1322_0_1	Q15691	ENSG00000101367	microtubule-associated protein, RP/EB family, member 1	MAPRE1	Expressed in all tissues
dd_Smed_v6_1334_0_1	O95861	ENSG00000162813	3'(2'), 5'-bisphosphate nucleotidase 1	BPNT1	Expressed in all tissues
dd_Smed_v6_1335_0_1	O43633	ENSG00000130724	charged multivesicular body protein 2A	CHMP2A	Expressed in all tissues
dd_Smed_v6_1339_0_1	P05091	ENSG00000111275	aldehyde dehydrogenase 2 family (mitochondrial)	ALDH2	Expressed in all tissues
dd_Smed_v6_1351_0_1	P42785	ENSG00000137509	prolylcarboxypeptidase (angiotensinase C)	PRCP	Expressed in all tissues
dd_Smed_v6_1358_0_1	Q9GZQ3	ENSG00000170619	COMM domain containing 5	COMMD5	Expressed in all tissues
dd_Smed_v6_1364_0_1	Q9UHD9	ENSG00000188021	ubiquilin 2	UBQLN2	Expressed in all tissues
dd_Smed_v6_1365_0_1	P20645	ENSG00000003056	mannose-6-phosphate receptor (cation dependent)	M6PR	Expressed in all tissues
dd_Smed_v6_1369_0_1	P36543	ENSG00000131100	ATPase, H+ transporting, lysosomal 31kDa, V1 subunit E1	ATP6V1E1	Expressed in all tissues
dd_Smed_v6_1373_1_1	Q8WUM4	ENSG00000170248	programmed cell death 6 interacting protein	PDCD6IP	Expressed in all tissues
dd_Smed_v6_13739_0_1	Q96MH6	ENSG00000167904	transmembrane protein 68	TMEM68	Expressed in all tissues
dd_Smed_v6_13906_1_1	Q9GZT4	ENSG00000167720	serine racemase	SRR	Expressed in all tissues
dd_Smed_v6_1391_0_1	Q9Y5K8	ENSG00000100554	ATPase, H+ transporting, lysosomal 34kDa, V1 subunit D	ATP6V1D	Expressed in all tissues
dd_Smed_v6_14029_0_1	Q8NEM0	ENSG00000147316	microcephalin 1	MCPH1	Expressed in all tissues
dd_Smed_v6_1411_0_1	P42765	ENSG00000167315	acetyl-CoA acyltransferase 2	ACAA2	Expressed in all tissues
dd_Smed_v6_1433_0_1	Q9P0L0	ENSG00000101558	VAMP (vesicle-associated membrane protein)-associated protein A, 33kDa	VAPA	Expressed in all tissues
dd_Smed_v6_1452_0_1	Q9UI12	ENSG00000047249	ATPase, H+ transporting, lysosomal 50/57kDa, V1 subunit H	ATP6V1H	Expressed in all tissues
dd_Smed_v6_1458_0_1	P28330	ENSG00000115361	acyl-CoA dehydrogenase, long chain	ACADL	Mixed
dd_Smed_v6_1462_0_1	O43765	ENSG00000104969	small glutamine-rich tetratricopeptide repeat (TPR)-containing, alpha	SGTA	Expressed in all tissues
dd_Smed_v6_1463_0_1	Q13492	ENSG00000073921	phosphatidylinositol binding clathrin assembly protein	PICALM	Expressed in all tissues
dd_Smed_v6_1467_0_1	Q96C19	ENSG00000142634	EF-hand domain family, member D2	EFHD2	Expressed in all tissues
dd_Smed_v6_14816_0_1	Q7Z699	ENSG00000166068	sprouty-related, EVH1 domain containing 1	SPRED1	Mixed
dd_Smed_v6_1493_0_1	P49419	ENSG00000164904	aldehyde dehydrogenase 7 family, member A1	ALDH7A1	Expressed in all tissues
dd_Smed_v6_1504_0_1	Q99653	ENSG00000187446	calcineurin-like EF-hand protein 1	CHP1	Expressed in all tissues
dd_Smed_v6_1505_0_1	Q15582	ENSG00000120708	transforming growth factor, beta-induced, 68kDa	TGFBI	Expressed in all tissues
dd_Smed_v6_1514_0_1	Q9UQN3	ENSG00000083937	charged multivesicular body protein 2B	CHMP2B	Expressed in all tissues
dd_Smed_v6_1517_0_1	Q03013	ENSG00000168765	glutathione S-transferase mu 4	GSTM4	Expressed in all tissues
dd_Smed_v6_1519_0_1	Q03154	ENSG00000243989	aminoacylase 1	ACY1	Group enriched	duodenum,kidney,liver,small intestine
dd_Smed_v6_1522_0_1	Q96B97	ENSG00000147010	SH3-domain kinase binding protein 1	SH3KBP1	Expressed in all tissues
dd_Smed_v6_1523_0_1	Q96LB9	ENSG00000159527	peptidoglycan recognition protein 3	PGLYRP3	Group enriched	esophagus,skin
dd_Smed_v6_1542_0_1	Q96B21	ENSG00000151715	transmembrane protein 45B	TMEM45B	Tissue enhanced	duodenum, small intestine
dd_Smed_v6_1559_0_1	P51572	ENSG00000185825	B-cell receptor-associated protein 31	BCAP31	Expressed in all tissues
dd_Smed_v6_1562_0_1	Q9H3N1	ENSG00000139921	thioredoxin-related transmembrane protein 1	TMX1	Expressed in all tissues
dd_Smed_v6_1565_0_1	Q5VXJ0	ENSG00000204021	lipase, family member K	LIPK	Tissue enriched	skin
dd_Smed_v6_1584_0_1	Q9UBR1	ENSG00000100024	ureidopropionase, beta	UPB1	Group enriched	kidney,liver
dd_Smed_v6_1585_0_1	P35520	ENSG00000160200	cystathionine-beta-synthase	CBS	Tissue enhanced	liver, pancreas
dd_Smed_v6_1589_0_1	Q16864	ENSG00000128524	ATPase, H+ transporting, lysosomal 14kDa, V1 subunit F	ATP6V1F	Expressed in all tissues
dd_Smed_v6_160_0_1	P07108	ENSG00000155368	diazepam binding inhibitor (GABA receptor modulator, acyl-CoA binding protein)	DBI	Expressed in all tissues
dd_Smed_v6_1621_0_1	Q9H2A2	ENSG00000118514	aldehyde dehydrogenase 8 family, member A1	ALDH8A1	Group enriched	kidney,liver
dd_Smed_v6_1622_0_1	Q99437	ENSG00000117410	ATPase, H+ transporting, lysosomal 21kDa, V0 subunit b	ATP6V0B	Expressed in all tissues
dd_Smed_v6_1626_0_1	O00160	ENSG00000142347	myosin IF	MYO1F	Expressed in all tissues
dd_Smed_v6_1644_0_1	Q49A17	ENSG00000174473	UDP-N-acetyl-alpha-D-galactosamine:polypeptide N-acetylgalactosaminyltransferase-like 6	GALNTL6	Tissue enhanced	brain, testis
dd_Smed_v6_1645_0_1	Q9HD42	ENSG00000131165	charged multivesicular body protein 1A	CHMP1A	Expressed in all tissues
dd_Smed_v6_1655_0_1	Q96N76	ENSG00000159650	urocanate hydratase 1	UROC1	Tissue enriched	liver
dd_Smed_v6_1670_0_1	Q9NXR1	ENSG00000072864	nudE neurodevelopment protein 1	NDE1	Expressed in all tissues
dd_Smed_v6_16749_0_1	Q6UW02	ENSG00000119004	cytochrome P450, family 20, subfamily A, polypeptide 1	CYP20A1	Expressed in all tissues
dd_Smed_v6_1680_0_1	P43353	ENSG00000006534	aldehyde dehydrogenase 3 family, member B1	ALDH3B1	Mixed
dd_Smed_v6_1694_0_1	Q14541	ENSG00000164749	hepatocyte nuclear factor 4, gamma	HNF4G	Tissue enhanced	duodenum, small intestine
dd_Smed_v6_1701_0_1	Q96H20	ENSG00000159210	SNF8, ESCRT-II complex subunit	SNF8	Expressed in all tissues
dd_Smed_v6_1709_0_1	P09467	ENSG00000165140	fructose-1,6-bisphosphatase 1	FBP1	Tissue enhanced	liver
dd_Smed_v6_1726_0_1	Q9NR71	ENSG00000188611	N-acylsphingosine amidohydrolase (non-lysosomal ceramidase) 2	ASAH2	Group enriched	duodenum,small intestine
dd_Smed_v6_1727_0_1	Q9UBQ0	ENSG00000111237	vacuolar protein sorting 29 homolog (S. cerevisiae)	VPS29	Expressed in all tissues
dd_Smed_v6_1731_0_1	Q15043	ENSG00000104635	solute carrier family 39 (zinc transporter), member 14	SLC39A14	Mixed
dd_Smed_v6_1734_0_1	Q9NQR4	ENSG00000114021	nitrilase family, member 2	NIT2	Expressed in all tissues
dd_Smed_v6_1736_0_1	Q5TGI0	ENSG00000146267	failed axon connections homolog (Drosophila)	FAXC	Mixed
dd_Smed_v6_1738_0_1	Q9BXP2	ENSG00000146828	solute carrier family 12, member 9	SLC12A9	Expressed in all tissues
dd_Smed_v6_1739_0_1	O75083	ENSG00000071127	WD repeat domain 1	WDR1	Expressed in all tissues
dd_Smed_v6_1743_0_1	Q6Y1H2	ENSG00000206527	protein tyrosine phosphatase-like (proline instead of catalytic arginine), member b	PTPLB	Expressed in all tissues
dd_Smed_v6_1758_0_1	Q9H9P8	ENSG00000087299	L-2-hydroxyglutarate dehydrogenase	L2HGDH	Expressed in all tissues
dd_Smed_v6_1762_0_1	Q96FZ7	ENSG00000176108	charged multivesicular body protein 6	CHMP6	Expressed in all tissues
dd_Smed_v6_1769_0_1	A6ND91	ENSG00000204653	aspartate dehydrogenase domain containing	ASPDH	Tissue enhanced	kidney, liver
dd_Smed_v6_1784_0_1	A1L0T0	ENSG00000105135	ilvB (bacterial acetolactate synthase)-like	ILVBL	Expressed in all tissues
dd_Smed_v6_1794_0_1	Q86VU5	ENSG00000165644	catechol-O-methyltransferase domain containing 1	COMTD1	Mixed
dd_Smed_v6_1823_0_1	O43772	ENSG00000178537	solute carrier family 25 (carnitine/acylcarnitine translocase), member 20	SLC25A20	Expressed in all tissues
dd_Smed_v6_1825_0_1	A4D2B0	ENSG00000214309	metallo-beta-lactamase domain containing 1	MBLAC1	Mixed
dd_Smed_v6_1827_0_1	Q9Y639	ENSG00000156642	neuroplastin	NPTN	Expressed in all tissues
dd_Smed_v6_1829_0_1	Q9H3U5	ENSG00000118855	major facilitator superfamily domain containing 1	MFSD1	Expressed in all tissues
dd_Smed_v6_1830_0_1	Q9BYG5	ENSG00000124171	par-6 family cell polarity regulator beta	PARD6B	Tissue enhanced	kidney
dd_Smed_v6_1835_0_1	Q8WUW1	ENSG00000254999	BRICK1, SCAR/WAVE actin-nucleating complex subunit	BRK1	Expressed in all tissues
dd_Smed_v6_1840_0_1	Q15904	ENSG00000071553	ATPase, H+ transporting, lysosomal accessory protein 1	ATP6AP1	Expressed in all tissues
dd_Smed_v6_1856_0_1	Q9NUQ9	ENSG00000153310	family with sequence similarity 49, member B	FAM49B	Expressed in all tissues
dd_Smed_v6_1858_0_1	P11586	ENSG00000100714	methylenetetrahydrofolate dehydrogenase (NADP+ dependent) 1, methenyltetrahydrofolate cyclohydrolase, formyltetrahydrofolate synthetase	MTHFD1	Expressed in all tissues
dd_Smed_v6_1865_0_1	Q9H2I8	ENSG00000148655	chromosome 10 open reading frame 11	C10orf11	Expressed in all tissues
dd_Smed_v6_1874_0_1	Q9NRA2	ENSG00000119899	solute carrier family 17 (acidic sugar transporter), member 5	SLC17A5	Expressed in all tissues
dd_Smed_v6_1884_1_1	Q68CP4	ENSG00000165102	heparan-alpha-glucosaminide N-acetyltransferase	HGSNAT	Expressed in all tissues
dd_Smed_v6_1889_0_1	P13804	ENSG00000140374	electron-transfer-flavoprotein, alpha polypeptide	ETFA	Expressed in all tissues
dd_Smed_v6_1894_0_1	Q8IV08	ENSG00000105223	phospholipase D family, member 3	PLD3	Expressed in all tissues
dd_Smed_v6_1895_0_1	P52758	ENSG00000132541	heat-responsive protein 12	HRSP12	Group enriched	kidney,liver
dd_Smed_v6_1896_0_1	P04181	ENSG00000065154	ornithine aminotransferase	OAT	Expressed in all tissues
dd_Smed_v6_1904_0_1	Q8NCC5	ENSG00000157800	solute carrier family 37, member 3	SLC37A3	Expressed in all tissues
dd_Smed_v6_1915_0_1	Q9NT62	ENSG00000144848	autophagy related 3	ATG3	Expressed in all tissues
dd_Smed_v6_1923_0_1	Q13485	ENSG00000141646	SMAD family member 4	SMAD4	Expressed in all tissues
dd_Smed_v6_1934_0_1	A8MQ27	ENSG00000214357	neuralized E3 ubiquitin protein ligase 1B	NEURL1B	Mixed
dd_Smed_v6_1937_0_1	Q9H0E2	ENSG00000078902	toll interacting protein	TOLLIP	Expressed in all tissues
dd_Smed_v6_1939_0_1	P23434	ENSG00000140905	glycine cleavage system protein H (aminomethyl carrier)	GCSH	Expressed in all tissues
dd_Smed_v6_194_0_1	M0QZD8	ENSG00000188897	Protein LOC388210	CTD-3088G3.8	Tissue enhanced	appendix
dd_Smed_v6_1942_0_1	O00754	ENSG00000104774	mannosidase, alpha, class 2B, member 1	MAN2B1	Expressed in all tissues
dd_Smed_v6_1961_0_1	P48444	ENSG00000095139	archain 1	ARCN1	Expressed in all tissues
dd_Smed_v6_1976_0_1	P61421	ENSG00000159720	ATPase, H+ transporting, lysosomal 38kDa, V0 subunit d1	ATP6V0D1	Expressed in all tissues
dd_Smed_v6_1978_0_1	Q13367	ENSG00000103723	adaptor-related protein complex 3, beta 2 subunit	AP3B2	Tissue enhanced	brain
dd_Smed_v6_2002_0_1	P36551	ENSG00000080819	coproporphyrinogen oxidase	CPOX	Expressed in all tissues
dd_Smed_v6_2006_0_1	P53990	ENSG00000182149	increased sodium tolerance 1 homolog (yeast)	IST1	Expressed in all tissues
dd_Smed_v6_2009_0_1	Q9UKU0	ENSG00000164398	acyl-CoA synthetase long-chain family member 6	ACSL6	Tissue enhanced	brain, testis
dd_Smed_v6_2011_0_1	Q8IUS5	ENSG00000172031	epoxide hydrolase 4	EPHX4	Tissue enhanced	brain
dd_Smed_v6_2012_0_1	Q9Y6G5	ENSG00000145781	COMM domain containing 10	COMMD10	Expressed in all tissues
dd_Smed_v6_2022_0_1	Q8NF37	ENSG00000153395	lysophosphatidylcholine acyltransferase 1	LPCAT1	Expressed in all tissues
dd_Smed_v6_2024_0_1	P13284	ENSG00000216490	interferon, gamma-inducible protein 30	IFI30	Expressed in all tissues
dd_Smed_v6_2028_0_1	Q6P0Q8	ENSG00000086015	microtubule associated serine/threonine kinase 2	MAST2	Expressed in all tissues
dd_Smed_v6_2037_0_1	Q12882	ENSG00000188641	dihydropyrimidine dehydrogenase	DPYD	Expressed in all tissues
dd_Smed_v6_2044_0_1	Q5T0D9	ENSG00000158109	tumor protein p63 regulated 1-like	TPRG1L	Expressed in all tissues
dd_Smed_v6_2053_0_1	Q8N357	ENSG00000213699	solute carrier family 35, member F6	SLC35F6	Expressed in all tissues
dd_Smed_v6_2058_0_1	Q6ZS17	ENSG00000039523	family with sequence similarity 65, member A	FAM65A	Expressed in all tissues
dd_Smed_v6_2062_0_1	Q96DG6	ENSG00000164237	carboxymethylenebutenolidase homolog (Pseudomonas)	CMBL	Expressed in all tissues
dd_Smed_v6_2066_0_1	Q12907	ENSG00000169223	lectin, mannose-binding 2	LMAN2	Expressed in all tissues
dd_Smed_v6_2076_0_1	O00264	ENSG00000101856	progesterone receptor membrane component 1	PGRMC1	Expressed in all tissues
dd_Smed_v6_2085_0_1	Q9NZ01	ENSG00000099797	trans-2,3-enoyl-CoA reductase	TECR	Expressed in all tissues
dd_Smed_v6_2096_0_1	Q8NBN7	ENSG00000160439	retinol dehydrogenase 13 (all-trans/9-cis)	RDH13	Expressed in all tissues
dd_Smed_v6_2098_0_1	Q9NZ45	ENSG00000122873	CDGSH iron sulfur domain 1	CISD1	Expressed in all tissues
dd_Smed_v6_2112_0_1	Q9Y4E8	ENSG00000135655	ubiquitin specific peptidase 15	USP15	Expressed in all tissues
dd_Smed_v6_2115_0_1	O00116	ENSG00000018510	alkylglycerone phosphate synthase	AGPS	Expressed in all tissues
dd_Smed_v6_2127_0_1	Q9Y5U8	ENSG00000060762	mitochondrial pyruvate carrier 1	MPC1	Expressed in all tissues
dd_Smed_v6_2129_0_1	O75886	ENSG00000115145	signal transducing adaptor molecule (SH3 domain and ITAM motif) 2	STAM2	Expressed in all tissues
dd_Smed_v6_2137_0_1	Q9Y2Q5	ENSG00000116586	late endosomal/lysosomal adaptor, MAPK and MTOR activator 2	LAMTOR2	Expressed in all tissues
dd_Smed_v6_214_0_1	P62273	ENSG00000213741	ribosomal protein S29	RPS29	Expressed in all tissues
dd_Smed_v6_214_1_1	P17900	ENSG00000196743	GM2 ganglioside activator	GM2A	Expressed in all tissues
dd_Smed_v6_2154_0_1	P30520	ENSG00000035687	adenylosuccinate synthase	ADSS	Expressed in all tissues
dd_Smed_v6_2161_0_1	Q04446	ENSG00000114480	glucan (1,4-alpha-), branching enzyme 1	GBE1	Expressed in all tissues
dd_Smed_v6_2183_0_1	Q9NRW4	ENSG00000112679	dual specificity phosphatase 22	DUSP22	Expressed in all tissues
dd_Smed_v6_2186_0_1	Q9Y2D4	ENSG00000144036	exocyst complex component 6B	EXOC6B	Mixed
dd_Smed_v6_219_0_1	P53634	ENSG00000109861	cathepsin C	CTSC	Expressed in all tissues
dd_Smed_v6_2219_0_1	P42357	ENSG00000084110	histidine ammonia-lyase	HAL	Group enriched	bone marrow,liver,skin
dd_Smed_v6_2228_0_1	A0AV96	ENSG00000163694	RNA binding motif protein 47	RBM47	Mixed
dd_Smed_v6_2235_0_1	Q92882	ENSG00000134996	osteoclast stimulating factor 1	OSTF1	Expressed in all tissues
dd_Smed_v6_2257_0_1	P08684	ENSG00000160868	cytochrome P450, family 3, subfamily A, polypeptide 4	CYP3A4	Group enriched	duodenum,liver,small intestine
dd_Smed_v6_2267_0_1	P55010	ENSG00000100664	eukaryotic translation initiation factor 5	EIF5	Expressed in all tissues
dd_Smed_v6_2271_0_1	Q86XE0	ENSG00000172803	sorting nexin 32	SNX32	Tissue enhanced	brain
dd_Smed_v6_2272_0_1	O75369	ENSG00000136068	filamin B, beta	FLNB	Expressed in all tissues
dd_Smed_v6_2290_0_1	Q9BPX1	ENSG00000087076	hydroxysteroid (17-beta) dehydrogenase 14	HSD17B14	Tissue enhanced	kidney
dd_Smed_v6_2304_0_1	Q14108	ENSG00000138760	scavenger receptor class B, member 2	SCARB2	Expressed in all tissues
dd_Smed_v6_231_0_1	O75347	ENSG00000171530	tubulin folding cofactor A	TBCA	Expressed in all tissues
dd_Smed_v6_2328_0_1	Q13126	ENSG00000099810	methylthioadenosine phosphorylase	MTAP	Expressed in all tissues
dd_Smed_v6_2351_0_1	P51589	ENSG00000134716	cytochrome P450, family 2, subfamily J, polypeptide 2	CYP2J2	Tissue enhanced	heart muscle, liver, small intestine
dd_Smed_v6_2388_0_1	P50897	ENSG00000131238	palmitoyl-protein thioesterase 1	PPT1	Expressed in all tissues
dd_Smed_v6_2399_0_1	P47755	ENSG00000198898	capping protein (actin filament) muscle Z-line, alpha 2	CAPZA2	Expressed in all tissues
dd_Smed_v6_2424_0_1	P84103	ENSG00000112081	serine/arginine-rich splicing factor 3	SRSF3	Expressed in all tissues
dd_Smed_v6_2445_0_1	Q86UL3	ENSG00000158669	1-acylglycerol-3-phosphate O-acyltransferase 6	AGPAT6	Expressed in all tissues
dd_Smed_v6_2447_0_1	Q6ZVM7	ENSG00000175662	target of myb1-like 2 (chicken)	TOM1L2	Expressed in all tissues
dd_Smed_v6_2465_0_1	Q9NVJ2	ENSG00000134108	ADP-ribosylation factor-like 8B	ARL8B	Expressed in all tissues
dd_Smed_v6_2472_0_1	O75907	ENSG00000185000	diacylglycerol O-acyltransferase 1	DGAT1	Group enriched	duodenum,small intestine
dd_Smed_v6_2480_0_1	P54920	ENSG00000105402	N-ethylmaleimide-sensitive factor attachment protein, alpha	NAPA	Expressed in all tissues
dd_Smed_v6_2482_0_1	Q9BRA2	ENSG00000129235	thioredoxin domain containing 17	TXNDC17	Expressed in all tissues
dd_Smed_v6_2486_0_1	Q969Q5	ENSG00000169228	RAB24, member RAS oncogene family	RAB24	Expressed in all tissues
dd_Smed_v6_2489_0_1	Q9BX74	ENSG00000162604	TM2 domain containing 1	TM2D1	Expressed in all tissues
dd_Smed_v6_2494_0_1	Q86YS6	ENSG00000172780	RAB43, member RAS oncogene family	RAB43	Tissue enhanced	thyroid gland
dd_Smed_v6_2501_0_1	Q9H0A8	ENSG00000140365	COMM domain containing 4	COMMD4	Expressed in all tissues
dd_Smed_v6_2508_0_1	Q8IYD2	ENSG00000162873	kelch domain containing 8A	KLHDC8A	Tissue enriched	ovary
dd_Smed_v6_2510_0_1	P59780	ENSG00000157823	adaptor-related protein complex 3, sigma 2 subunit	AP3S2	Expressed in all tissues
dd_Smed_v6_2513_0_1	Q96L92	ENSG00000143376	sorting nexin family member 27	SNX27	Expressed in all tissues
dd_Smed_v6_2519_0_1	Q567U6	ENSG00000125633	coiled-coil domain containing 93	CCDC93	Expressed in all tissues
dd_Smed_v6_2523_0_1	P08582	ENSG00000163975	antigen p97 (melanoma associated) identified by monoclonal antibodies 133.2 and 96.5	MFI2	Tissue enriched	salivary gland
dd_Smed_v6_253_0_1	P27449	ENSG00000185883	ATPase, H+ transporting, lysosomal 16kDa, V0 subunit c	ATP6V0C	Expressed in all tissues
dd_Smed_v6_2531_0_1	P78537	ENSG00000135441	biogenesis of lysosomal organelles complex-1, subunit 1	BLOC1S1	Expressed in all tissues
dd_Smed_v6_2533_0_1	O60879	ENSG00000147202	diaphanous-related formin 2	DIAPH2	Expressed in all tissues
dd_Smed_v6_2534_0_1	O14617	ENSG00000065000	adaptor-related protein complex 3, delta 1 subunit	AP3D1	Expressed in all tissues
dd_Smed_v6_2538_0_1	P54646	ENSG00000162409	protein kinase, AMP-activated, alpha 2 catalytic subunit	PRKAA2	Tissue enhanced	heart muscle
dd_Smed_v6_2549_0_1	Q96T51	ENSG00000176783	RUN and FYVE domain containing 1	RUFY1	Expressed in all tissues
dd_Smed_v6_2563_0_1	Q12792	ENSG00000151239	twinfilin actin-binding protein 1	TWF1	Expressed in all tissues
dd_Smed_v6_257_0_1	Q5W064	ENSG00000204022	lipase, family member J	LIPJ	Tissue enriched	testis
dd_Smed_v6_2572_0_1	Q9UK41	ENSG00000160948	vacuolar protein sorting 28 homolog (S. cerevisiae)	VPS28	Expressed in all tissues
dd_Smed_v6_2579_0_1	O75165	ENSG00000138246	DnaJ (Hsp40) homolog, subfamily C, member 13	DNAJC13	Expressed in all tissues
dd_Smed_v6_2581_0_1	Q9P2E3	ENSG00000124201	zinc finger, NFX1-type containing 1	ZNFX1	Expressed in all tissues
dd_Smed_v6_2622_0_1	Q8WYK1	ENSG00000155052	contactin associated protein-like 5	CNTNAP5	Group enriched	adrenal gland,brain,gallbladder
dd_Smed_v6_2631_0_1	P61086	ENSG00000078140	ubiquitin-conjugating enzyme E2K	UBE2K	Expressed in all tissues
dd_Smed_v6_2650_0_1	Q9BXS5	ENSG00000072958	adaptor-related protein complex 1, mu 1 subunit	AP1M1	Expressed in all tissues
dd_Smed_v6_2652_0_1	Q96QK1	ENSG00000069329	vacuolar protein sorting 35 homolog (S. cerevisiae)	VPS35	Expressed in all tissues
dd_Smed_v6_2663_0_1	P49748	ENSG00000072778	acyl-CoA dehydrogenase, very long chain	ACADVL	Expressed in all tissues
dd_Smed_v6_2670_0_1	O00258	ENSG00000182093	tryptophan rich basic protein	WRB	Expressed in all tissues
dd_Smed_v6_2673_0_1	Q9P232	ENSG00000113805	contactin 3 (plasmacytoma associated)	CNTN3	Mixed
dd_Smed_v6_2681_0_1	O43747	ENSG00000166747	adaptor-related protein complex 1, gamma 1 subunit	AP1G1	Expressed in all tissues
dd_Smed_v6_2690_0_1	Q6P1J6	ENSG00000163803	phospholipase B1	PLB1	Tissue enhanced	small intestine
dd_Smed_v6_2699_0_1	P54803	ENSG00000054983	galactosylceramidase	GALC	Expressed in all tissues
dd_Smed_v6_2703_0_1	Q32NB8	ENSG00000087157	phosphatidylglycerophosphate synthase 1	PGS1	Expressed in all tissues
dd_Smed_v6_2710_0_1	Q15464	ENSG00000107338	Src homology 2 domain containing adaptor protein B	SHB	Expressed in all tissues
dd_Smed_v6_2711_0_1	Q86X76	ENSG00000158793	nitrilase 1	NIT1	Expressed in all tissues
dd_Smed_v6_2716_0_1	O95096	ENSG00000125820	NK2 homeobox 2	NKX2-2	Tissue enhanced	brain, pancreas, stomach
dd_Smed_v6_2717_0_1	Q08257	ENSG00000116791	crystallin, zeta (quinone reductase)	CRYZ	Expressed in all tissues
dd_Smed_v6_2732_0_1	Q9Y5X1	ENSG00000130340	sorting nexin 9	SNX9	Expressed in all tissues
dd_Smed_v6_2757_0_1	Q16739	ENSG00000148154	UDP-glucose ceramide glucosyltransferase	UGCG	Expressed in all tissues
dd_Smed_v6_2790_0_1	Q15041	ENSG00000170540	ADP-ribosylation factor-like 6 interacting protein 1	ARL6IP1	Expressed in all tissues
dd_Smed_v6_2795_0_1	Q9NZ42	ENSG00000205155	presenilin enhancer gamma secretase subunit	PSENEN	Expressed in all tissues
dd_Smed_v6_280_0_1	P11926	ENSG00000115758	ornithine decarboxylase 1	ODC1	Expressed in all tissues
dd_Smed_v6_2804_0_1	P60983	ENSG00000197045	glia maturation factor, beta	GMFB	Expressed in all tissues
dd_Smed_v6_2825_0_1	Q9Y2J2	ENSG00000082397	erythrocyte membrane protein band 4.1-like 3	EPB41L3	Expressed in all tissues
dd_Smed_v6_2832_0_1	Q9H6R3	ENSG00000111058	acyl-CoA synthetase short-chain family member 3	ACSS3	Mixed
dd_Smed_v6_2836_0_1	Q02410	ENSG00000107282	amyloid beta (A4) precursor protein-binding, family A, member 1	APBA1	Tissue enhanced	brain
dd_Smed_v6_2862_0_1	O95857	ENSG00000106537	tetraspanin 13	TSPAN13	Expressed in all tissues
dd_Smed_v6_2889_0_1	Q14596	ENSG00000188554	neighbor of BRCA1 gene 1	NBR1	Expressed in all tissues
dd_Smed_v6_2891_0_1	Q9BUL8	ENSG00000114209	programmed cell death 10	PDCD10	Expressed in all tissues
dd_Smed_v6_2892_0_1	P22307	ENSG00000116171	sterol carrier protein 2	SCP2	Expressed in all tissues
dd_Smed_v6_2894_0_1	Q9UDR5	ENSG00000008311	aminoadipate-semialdehyde synthase	AASS	Mixed
dd_Smed_v6_2908_0_1	Q93099	ENSG00000113924	homogentisate 1,2-dioxygenase	HGD	Tissue enhanced	kidney, liver
dd_Smed_v6_2915_0_1	O14966	ENSG00000117280	RAB7, member RAS oncogene family-like 1	RAB7L1	Expressed in all tissues
dd_Smed_v6_2918_0_1	Q9H2V7	ENSG00000169682	spinster homolog 1 (Drosophila)	SPNS1	Expressed in all tissues
dd_Smed_v6_2923_0_1	Q7L5Y1	ENSG00000132199	enolase superfamily member 1	ENOSF1	Expressed in all tissues
dd_Smed_v6_2951_0_1	Q8WTV0	ENSG00000073060	scavenger receptor class B, member 1	SCARB1	Expressed in all tissues
dd_Smed_v6_2981_0_1	Q9BXD5	ENSG00000135838	N-acetylneuraminate pyruvate lyase (dihydrodipicolinate synthase)	NPL	Expressed in all tissues
dd_Smed_v6_2996_0_1	Q8WYP3	ENSG00000132669	Ras and Rab interactor 2	RIN2	Expressed in all tissues
dd_Smed_v6_3_0_1	P60709	ENSG00000075624	actin, beta	ACTB	Expressed in all tissues
dd_Smed_v6_3019_0_1	Q8NBX0	ENSG00000143653	saccharopine dehydrogenase (putative)	SCCPDH	Expressed in all tissues
dd_Smed_v6_3032_0_1	P46952	ENSG00000162882	3-hydroxyanthranilate 3,4-dioxygenase	HAAO	Expressed in all tissues
dd_Smed_v6_3043_0_1	Q9NQC7	ENSG00000083799	cylindromatosis (turban tumor syndrome)	CYLD	Expressed in all tissues
dd_Smed_v6_3045_0_1	Q641Q2	ENSG00000099290	family with sequence similarity 21, member A	FAM21A	Expressed in all tissues
dd_Smed_v6_3049_0_1	P42858	ENSG00000197386	huntingtin	HTT	Expressed in all tissues
dd_Smed_v6_3050_0_1	Q9Y376	ENSG00000135932	calcium binding protein 39	CAB39	Expressed in all tissues
dd_Smed_v6_3066_0_1	Q96HV5	ENSG00000163900	transmembrane protein 41A	TMEM41A	Expressed in all tissues
dd_Smed_v6_3071_0_1	P51798	ENSG00000103249	chloride channel, voltage-sensitive 7	CLCN7	Expressed in all tissues
dd_Smed_v6_3084_0_1	Q01415	ENSG00000156958	galactokinase 2	GALK2	Expressed in all tissues
dd_Smed_v6_3125_0_1	O75503	ENSG00000102805	ceroid-lipofuscinosis, neuronal 5	CLN5	Expressed in all tissues
dd_Smed_v6_3136_0_1	Q9Y2I7	ENSG00000115020	phosphoinositide kinase, FYVE finger containing	PIKFYVE	Expressed in all tissues
dd_Smed_v6_3137_0_1	P27544	ENSG00000223802	ceramide synthase 1	CERS1	Group enriched	brain,testis
dd_Smed_v6_3144_0_1	Q9Y6N1	ENSG00000166260	cytochrome c oxidase assembly homolog 11 (yeast)	COX11	Expressed in all tissues
dd_Smed_v6_3148_0_1	Q9NZN3	ENSG00000013016	EH-domain containing 3	EHD3	Tissue enhanced	brain
dd_Smed_v6_3153_0_1	Q8N0X7	ENSG00000133104	spastic paraplegia 20 (Troyer syndrome)	SPG20	Expressed in all tissues
dd_Smed_v6_3154_0_1	Q9BYV1	ENSG00000113492	alanine--glyoxylate aminotransferase 2	AGXT2	Group enriched	kidney,liver
dd_Smed_v6_3157_0_1	Q86X83	ENSG00000114744	COMM domain containing 2	COMMD2	Expressed in all tissues
dd_Smed_v6_3165_0_1	Q8TB40	ENSG00000100439	abhydrolase domain containing 4	ABHD4	Expressed in all tissues
dd_Smed_v6_3174_0_1	Q9BVC4	ENSG00000167965	MTOR associated protein, LST8 homolog (S. cerevisiae)	MLST8	Expressed in all tissues
dd_Smed_v6_3179_0_1	Q9BXW6	ENSG00000141447	oxysterol binding protein-like 1A	OSBPL1A	Expressed in all tissues
dd_Smed_v6_3189_0_1	Q9UPY6	ENSG00000132970	WAS protein family, member 3	WASF3	Tissue enhanced	brain
dd_Smed_v6_3209_0_1	O00462	ENSG00000109323	mannosidase, beta A, lysosomal	MANBA	Expressed in all tissues
dd_Smed_v6_3212_0_1	Q14156	ENSG00000132294	EFR3 homolog A (S. cerevisiae)	EFR3A	Expressed in all tissues
dd_Smed_v6_3217_0_1	Q53H96	ENSG00000104524	pyrroline-5-carboxylate reductase-like	PYCRL	Mixed
dd_Smed_v6_3268_0_1	Q969R2	ENSG00000184792	oxysterol binding protein 2	OSBP2	Tissue enhanced	bone marrow, testis
dd_Smed_v6_3273_0_1	Q9HCE0	ENSG00000152223	ectopic P-granules autophagy protein 5 homolog (C. elegans)	EPG5	Expressed in all tissues
dd_Smed_v6_329_0_1	P07339	ENSG00000117984	cathepsin D	CTSD	Expressed in all tissues
dd_Smed_v6_3308_0_1	P32320	ENSG00000158825	cytidine deaminase	CDA	Tissue enhanced	bone marrow
dd_Smed_v6_3338_0_1	P11117	ENSG00000134575	acid phosphatase 2, lysosomal	ACP2	Expressed in all tissues
dd_Smed_v6_3344_0_1	A5PLL7	ENSG00000240849	transmembrane protein 189	TMEM189	Expressed in all tissues
dd_Smed_v6_335_0_1	O75390	ENSG00000062485	citrate synthase	CS	Expressed in all tissues
dd_Smed_v6_3369_0_1	Q12768	ENSG00000164961	KIAA0196	KIAA0196	Expressed in all tissues
dd_Smed_v6_3371_0_1	Q53GQ0	ENSG00000149084	hydroxysteroid (17-beta) dehydrogenase 12	HSD17B12	Expressed in all tissues
dd_Smed_v6_3372_0_1	Q8NDA8	ENSG00000179832	maestro heat-like repeat family member 1	MROH1	Expressed in all tissues
dd_Smed_v6_3373_0_1	Q99447	ENSG00000185813	phosphate cytidylyltransferase 2, ethanolamine	PCYT2	Expressed in all tissues
dd_Smed_v6_3376_0_1	P85298	ENSG00000241484	Rho GTPase activating protein 8	ARHGAP8	Mixed
dd_Smed_v6_3398_0_1	Q8IZQ1	ENSG00000163625	WD repeat and FYVE domain containing 3	WDFY3	Expressed in all tissues
dd_Smed_v6_3401_0_1	Q96DB2	ENSG00000163517	histone deacetylase 11	HDAC11	Mixed
dd_Smed_v6_3439_0_1	Q5BJD5	ENSG00000166471	transmembrane protein 41B	TMEM41B	Expressed in all tissues
dd_Smed_v6_3453_0_1	P49223	ENSG00000101446	serine peptidase inhibitor, Kunitz type, 3	SPINT3	Not detected
dd_Smed_v6_3470_0_1	Q96KG9	ENSG00000142186	SCY1-like 1 (S. cerevisiae)	SCYL1	Expressed in all tissues
dd_Smed_v6_3487_0_1	Q9UBF6	ENSG00000114125	ring finger protein 7	RNF7	Expressed in all tissues
dd_Smed_v6_3507_0_1	Q9Y255	ENSG00000169230	PRELI domain containing 1	PRELID1	Expressed in all tissues
dd_Smed_v6_3508_0_1	Q9HAS3	ENSG00000197506	solute carrier family 28 (concentrative nucleoside transporter), member 3	SLC28A3	Tissue enhanced	bone marrow, gallbladder
dd_Smed_v6_3509_0_1	Q86TP1	ENSG00000143363	prune exopolyphosphatase	PRUNE	Expressed in all tissues
dd_Smed_v6_3512_0_1	Q6IAN0	ENSG00000109016	dehydrogenase/reductase (SDR family) member 7B	DHRS7B	Expressed in all tissues
dd_Smed_v6_3520_0_1	O14972	ENSG00000157538	Down syndrome critical region gene 3	DSCR3	Expressed in all tissues
dd_Smed_v6_3535_0_1	Q9Y676	ENSG00000204568	mitochondrial ribosomal protein S18B	MRPS18B	Expressed in all tissues
dd_Smed_v6_3546_0_1	P52888	ENSG00000172009	thimet oligopeptidase 1	THOP1	Expressed in all tissues
dd_Smed_v6_3550_0_1	P48775	ENSG00000151790	tryptophan 2,3-dioxygenase	TDO2	Tissue enriched	liver
dd_Smed_v6_3552_0_1	Q86VX2	ENSG00000149600	COMM domain containing 7	COMMD7	Expressed in all tissues
dd_Smed_v6_3560_0_1	Q99489	ENSG00000203797	D-aspartate oxidase	DDO	Mixed
dd_Smed_v6_3565_0_1	Q13950	ENSG00000124813	runt-related transcription factor 2	RUNX2	Mixed
dd_Smed_v6_3578_0_1	Q8IY34	ENSG00000110446	solute carrier family 15 (oligopeptide transporter), member 3	SLC15A3	Expressed in all tissues
dd_Smed_v6_3596_0_1	Q02978	ENSG00000108528	solute carrier family 25 (mitochondrial carrier; oxoglutarate carrier), member 11	SLC25A11	Expressed in all tissues
dd_Smed_v6_3611_0_1	P33897	ENSG00000101986	ATP-binding cassette, sub-family D (ALD), member 1	ABCD1	Expressed in all tissues
dd_Smed_v6_3630_0_1	Q9HDC9	ENSG00000101474	adipocyte plasma membrane associated protein	APMAP	Expressed in all tissues
dd_Smed_v6_3637_0_1	Q9Y3C0	ENSG00000120860	coiled-coil domain containing 53	CCDC53	Expressed in all tissues
dd_Smed_v6_3638_0_1	Q9Y2Y9	ENSG00000169926	Kruppel-like factor 13	KLF13	Expressed in all tissues
dd_Smed_v6_3657_0_1	Q93100	ENSG00000102893	phosphorylase kinase, beta	PHKB	Expressed in all tissues
dd_Smed_v6_366_0_1	P52209	ENSG00000142657	phosphogluconate dehydrogenase	PGD	Expressed in all tissues
dd_Smed_v6_3661_0_1	P83436	ENSG00000168434	component of oligomeric golgi complex 7	COG7	Expressed in all tissues
dd_Smed_v6_3673_0_1	Q6ZNB7	ENSG00000187546	alkylglycerol monooxygenase	AGMO	Tissue enhanced	liver
dd_Smed_v6_3685_0_1	Q7KZI7	ENSG00000072518	MAP/microtubule affinity-regulating kinase 2	MARK2	Expressed in all tissues
dd_Smed_v6_3687_0_1	P27987	ENSG00000143772	inositol-trisphosphate 3-kinase B	ITPKB	Expressed in all tissues
dd_Smed_v6_3713_0_1	O95406	ENSG00000100528	cornichon family AMPA receptor auxiliary protein 1	CNIH1	Expressed in all tissues
dd_Smed_v6_3716_0_1	Q96JI7	ENSG00000104133	spastic paraplegia 11 (autosomal recessive)	SPG11	Expressed in all tissues
dd_Smed_v6_3737_0_1	A6NEE1	ENSG00000175985	pleckstrin homology domain containing, family D (with coiled-coil domains) member 1	PLEKHD1	Tissue enhanced	thyroid gland
dd_Smed_v6_3754_0_1	Q96JJ3	ENSG00000062598	engulfment and cell motility 2	ELMO2	Expressed in all tissues
dd_Smed_v6_3760_0_1	O95487	ENSG00000138802	SEC24 family member B	SEC24B	Expressed in all tissues
dd_Smed_v6_3769_0_1	P53611	ENSG00000137955	Rab geranylgeranyltransferase, beta subunit	RABGGTB	Expressed in all tissues
dd_Smed_v6_377_0_1	Q9HB71	ENSG00000116161	calcyclin binding protein	CACYBP	Expressed in all tissues
dd_Smed_v6_3775_0_1	Q9Y2K6	ENSG00000136878	ubiquitin specific peptidase 20	USP20	Expressed in all tissues
dd_Smed_v6_3798_0_1	O60271	ENSG00000008294	sperm associated antigen 9	SPAG9	Expressed in all tissues
dd_Smed_v6_3804_0_1	O15254	ENSG00000087008	acyl-CoA oxidase 3, pristanoyl	ACOX3	Expressed in all tissues
dd_Smed_v6_3808_0_1	Q15493	ENSG00000130988	regucalcin	RGN	Group enriched	adrenal gland,kidney,liver
dd_Smed_v6_3821_0_1	Q9NR83	ENSG00000125520	SLC2A4 regulator	SLC2A4RG	Expressed in all tissues
dd_Smed_v6_3839_0_1	O95562	ENSG00000213064	SFT2 domain containing 2	SFT2D2	Expressed in all tissues
dd_Smed_v6_3842_2_1	Q9GZP4	ENSG00000057757	PITH (C-terminal proteasome-interacting domain of thioredoxin-like) domain containing 1	PITHD1	Expressed in all tissues
dd_Smed_v6_3906_0_1	P00480	ENSG00000036473	ornithine carbamoyltransferase	OTC	Group enriched	duodenum,liver,small intestine
dd_Smed_v6_3910_0_1	Q13907	ENSG00000067064	isopentenyl-diphosphate delta isomerase 1	IDI1	Expressed in all tissues
dd_Smed_v6_3921_0_1	P42345	ENSG00000198793	mechanistic target of rapamycin (serine/threonine kinase)	MTOR	Expressed in all tissues
dd_Smed_v6_3925_0_1	Q96EV8	ENSG00000047579	dystrobrevin binding protein 1	DTNBP1	Expressed in all tissues
dd_Smed_v6_3947_0_1	Q9UBK8	ENSG00000124275	5-methyltetrahydrofolate-homocysteine methyltransferase reductase	MTRR	Expressed in all tissues
dd_Smed_v6_3949_0_1	P0DI82	ENSG00000256060	trafficking protein particle complex 2 pseudogene 1	TRAPPC2P1	Expressed in all tissues
dd_Smed_v6_3959_0_1	Q16877	ENSG00000114268	6-phosphofructo-2-kinase/fructose-2,6-biphosphatase 4	PFKFB4	Mixed
dd_Smed_v6_3969_0_1	Q96AX1	ENSG00000139719	vacuolar protein sorting 33 homolog A (S. cerevisiae)	VPS33A	Expressed in all tissues
dd_Smed_v6_398_0_1	P09972	ENSG00000109107	aldolase C, fructose-bisphosphate	ALDOC	Expressed in all tissues
dd_Smed_v6_3990_0_1	Q8IXI2	ENSG00000126858	ras homolog family member T1	RHOT1	Expressed in all tissues
dd_Smed_v6_3998_0_1	Q9P035	ENSG00000074696	protein tyrosine phosphatase-like A domain containing 1	PTPLAD1	Expressed in all tissues
dd_Smed_v6_3999_0_1	Q96PE3	ENSG00000040933	inositol polyphosphate-4-phosphatase, type I, 107kDa	INPP4A	Expressed in all tissues
dd_Smed_v6_4001_0_1	Q9NP72	ENSG00000099246	RAB18, member RAS oncogene family	RAB18	Expressed in all tissues
dd_Smed_v6_4004_0_1	P53609	ENSG00000164219	protein geranylgeranyltransferase type I, beta subunit	PGGT1B	Expressed in all tissues
dd_Smed_v6_4008_0_1	Q9Y5K3	ENSG00000102230	phosphate cytidylyltransferase 1, choline, beta	PCYT1B	Tissue enhanced	brain, testis
dd_Smed_v6_4014_0_1	Q9Y6Y8	ENSG00000107651	SEC23 interacting protein	SEC23IP	Expressed in all tissues
dd_Smed_v6_4043_0_1	Q8IYI6	ENSG00000116903	exocyst complex component 8	EXOC8	Expressed in all tissues
dd_Smed_v6_4050_0_1	Q9BX95	ENSG00000126821	sphingosine-1-phosphate phosphatase 1	SGPP1	Expressed in all tissues
dd_Smed_v6_4056_0_1	Q6UWU2	ENSG00000163521	galactosidase, beta 1-like	GLB1L	Tissue enhanced	testis
dd_Smed_v6_4076_1_1	P51795	ENSG00000171365	chloride channel, voltage-sensitive 5	CLCN5	Tissue enriched	kidney
dd_Smed_v6_4116_0_1	Q9NQZ5	ENSG00000084090	StAR-related lipid transfer (START) domain containing 7	STARD7	Expressed in all tissues
dd_Smed_v6_413_0_1	Q6ZWT7	ENSG00000143797	membrane bound O-acyltransferase domain containing 2	MBOAT2	Mixed
dd_Smed_v6_4132_0_1	P56817	ENSG00000186318	beta-site APP-cleaving enzyme 1	BACE1	Expressed in all tissues
dd_Smed_v6_4154_0_1	P35052	ENSG00000063660	glypican 1	GPC1	Tissue enhanced	skin
dd_Smed_v6_4178_0_1	Q5MNZ6	ENSG00000141580	WD repeat domain 45B	WDR45B	Expressed in all tissues
dd_Smed_v6_4182_0_1	Q9NZD8	ENSG00000090487	spastic paraplegia 21 (autosomal recessive, Mast syndrome)	SPG21	Expressed in all tissues
dd_Smed_v6_4183_0_1	Q2M389	ENSG00000136051	KIAA1033	KIAA1033	Expressed in all tissues
dd_Smed_v6_4184_0_1	P49961	ENSG00000138185	ectonucleoside triphosphate diphosphohydrolase 1	ENTPD1	Expressed in all tissues
dd_Smed_v6_4190_0_1	Q13588	ENSG00000154016	GRB2-related adaptor protein	GRAP	Tissue enhanced	lymph node, tonsil
dd_Smed_v6_4192_0_1	Q8IWA5	ENSG00000129353	solute carrier family 44 (choline transporter), member 2	SLC44A2	Expressed in all tissues
dd_Smed_v6_4193_0_1	O95425	ENSG00000197321	supervillin	SVIL	Expressed in all tissues
dd_Smed_v6_4198_0_1	Q96BR1	ENSG00000104205	serum/glucocorticoid regulated kinase family, member 3	SGK3	Expressed in all tissues
dd_Smed_v6_4201_0_1	Q9P2J9	ENSG00000172840	pyruvate dehyrogenase phosphatase catalytic subunit 2	PDP2	Mixed
dd_Smed_v6_4206_0_1	P48147	ENSG00000085377	prolyl endopeptidase	PREP	Expressed in all tissues
dd_Smed_v6_423_0_1	P01040	ENSG00000121552	cystatin A (stefin A)	CSTA	Tissue enhanced	esophagus, tonsil
dd_Smed_v6_4236_0_1	Q8IWV8	ENSG00000024048	ubiquitin protein ligase E3 component n-recognin 2	UBR2	Expressed in all tissues
dd_Smed_v6_4243_0_1	Q9Y5W8	ENSG00000071189	sorting nexin 13	SNX13	Expressed in all tissues
dd_Smed_v6_4260_0_1	Q9NZL9	ENSG00000038274	methionine adenosyltransferase II, beta	MAT2B	Expressed in all tissues
dd_Smed_v6_4270_0_1	Q5TA50	ENSG00000224051	glycolipid transfer protein domain containing 1	GLTPD1	Expressed in all tissues
dd_Smed_v6_4278_0_1	P35610	ENSG00000057252	sterol O-acyltransferase 1	SOAT1	Tissue enriched	adrenal gland
dd_Smed_v6_4286_0_1	Q8IWB9	ENSG00000136478	testis expressed 2	TEX2	Expressed in all tissues
dd_Smed_v6_4305_0_1	Q9H6V9	ENSG00000118961	chromosome 2 open reading frame 43	C2orf43	Mixed
dd_Smed_v6_4332_0_1	Q8WZ64	ENSG00000047365	ArfGAP with RhoGAP domain, ankyrin repeat and PH domain 2	ARAP2	Mixed
dd_Smed_v6_4367_0_1	P80404	ENSG00000183044	4-aminobutyrate aminotransferase	ABAT	Tissue enhanced	liver
dd_Smed_v6_4388_0_1	Q7L523	ENSG00000155876	Ras-related GTP binding A	RRAGA	Expressed in all tissues
dd_Smed_v6_4391_0_1	Q9NRN7	ENSG00000149313	aminoadipate-semialdehyde dehydrogenase-phosphopantetheinyl transferase	AASDHPPT	Expressed in all tissues
dd_Smed_v6_4393_0_1	Q9Y243	ENSG00000117020	v-akt murine thymoma viral oncogene homolog 3	AKT3	Expressed in all tissues
dd_Smed_v6_4396_0_1	P11169	ENSG00000059804	solute carrier family 2 (facilitated glucose transporter), member 3	SLC2A3	Expressed in all tissues
dd_Smed_v6_4416_0_1	Q92947	ENSG00000105607	glutaryl-CoA dehydrogenase	GCDH	Expressed in all tissues
dd_Smed_v6_4436_0_1	Q6XUX3	ENSG00000133059	dual serine/threonine and tyrosine protein kinase	DSTYK	Mixed
dd_Smed_v6_4446_0_1	Q9ULJ8	ENSG00000158528	protein phosphatase 1, regulatory subunit 9A	PPP1R9A	Mixed
dd_Smed_v6_4449_0_1	P11509	ENSG00000255974	cytochrome P450, family 2, subfamily A, polypeptide 6	CYP2A6	Tissue enriched	liver
dd_Smed_v6_4450_0_1	Q8NHH9	ENSG00000119787	atlastin GTPase 2	ATL2	Expressed in all tissues
dd_Smed_v6_4469_0_1	Q96L94	ENSG00000157734	sorting nexin 22	SNX22	Tissue enhanced	tonsil
dd_Smed_v6_448_0_1	Q9ULV4	ENSG00000110880	coronin, actin binding protein, 1C	CORO1C	Expressed in all tissues
dd_Smed_v6_4487_0_1	O75367	ENSG00000113648	H2A histone family, member Y	H2AFY	Expressed in all tissues
dd_Smed_v6_4496_0_1	O15442	ENSG00000186732	metallophosphoesterase domain containing 1	MPPED1	Group enriched	brain,liver
dd_Smed_v6_4523_0_1	Q9BYV7	ENSG00000197580	beta-carotene oxygenase 2	BCO2	Tissue enhanced	heart muscle, liver
dd_Smed_v6_4534_0_1	Q9H269	ENSG00000215305	vacuolar protein sorting 16 homolog (S. cerevisiae)	VPS16	Expressed in all tissues
dd_Smed_v6_4550_0_1	Q9P253	ENSG00000104142	vacuolar protein sorting 18 homolog (S. cerevisiae)	VPS18	Expressed in all tissues
dd_Smed_v6_4554_0_1	Q8IWW8	ENSG00000147576	alcohol dehydrogenase, iron containing, 1	ADHFE1	Expressed in all tissues
dd_Smed_v6_4557_0_1	P50542	ENSG00000139197	peroxisomal biogenesis factor 5	PEX5	Expressed in all tissues
dd_Smed_v6_456_0_1	Q9UBX1	ENSG00000174080	cathepsin F	CTSF	Expressed in all tissues
dd_Smed_v6_4568_0_1	Q8IY33	ENSG00000164877	MICAL-like 2	MICALL2	Expressed in all tissues
dd_Smed_v6_457_0_1	P62937	ENSG00000196262	peptidylprolyl isomerase A (cyclophilin A)	PPIA	Expressed in all tissues
dd_Smed_v6_4571_0_1	O60931	ENSG00000040531	cystinosin, lysosomal cystine transporter	CTNS	Expressed in all tissues
dd_Smed_v6_4591_0_1	P19440	ENSG00000100031	gamma-glutamyltransferase 1	GGT1	Tissue enhanced	kidney
dd_Smed_v6_4616_0_1	Q08AM6	ENSG00000103043	Vac14 homolog (S. cerevisiae)	VAC14	Expressed in all tissues
dd_Smed_v6_4655_0_1	Q49AR2	ENSG00000082213	chromosome 5 open reading frame 22	C5orf22	Expressed in all tissues
dd_Smed_v6_4668_0_1	P10253	ENSG00000171298	glucosidase, alpha; acid	GAA	Expressed in all tissues
dd_Smed_v6_4674_0_1	Q6PIU2	ENSG00000144959	neutral cholesterol ester hydrolase 1	NCEH1	Mixed
dd_Smed_v6_4685_0_1	P18846	ENSG00000123268	activating transcription factor 1	ATF1	Expressed in all tissues
dd_Smed_v6_4739_0_1	P49281	ENSG00000110911	solute carrier family 11 (proton-coupled divalent metal ion transporter), member 2	SLC11A2	Expressed in all tissues
dd_Smed_v6_4741_0_1	O60478	ENSG00000077585	G protein-coupled receptor 137B	GPR137B	Mixed
dd_Smed_v6_4759_0_1	Q8N122	ENSG00000141564	regulatory associated protein of MTOR, complex 1	RPTOR	Expressed in all tissues
dd_Smed_v6_476_0_1	P50395	ENSG00000057608	GDP dissociation inhibitor 2	GDI2	Expressed in all tissues
dd_Smed_v6_4766_0_1	Q9H7X0	ENSG00000122390	N(alpha)-acetyltransferase 60, NatF catalytic subunit	NAA60	Expressed in all tissues
dd_Smed_v6_4779_0_1	O95208	ENSG00000072134	epsin 2	EPN2	Expressed in all tissues
dd_Smed_v6_4785_0_1	O95671	ENSG00000169093	acetylserotonin O-methyltransferase-like	ASMTL	Expressed in all tissues
dd_Smed_v6_4794_0_1	Q92569	ENSG00000117461	phosphoinositide-3-kinase, regulatory subunit 3 (gamma)	PIK3R3	Tissue enhanced	testis
dd_Smed_v6_4821_0_1	Q7Z7A4	ENSG00000168297	PX domain containing serine/threonine kinase	PXK	Expressed in all tissues
dd_Smed_v6_4823_0_1	Q9NZ52	ENSG00000125447	golgi-associated, gamma adaptin ear containing, ARF binding protein 3	GGA3	Expressed in all tissues
dd_Smed_v6_4832_0_1	Q5VZK9	ENSG00000079691	leucine rich repeat containing 16A	LRRC16A	Mixed
dd_Smed_v6_4834_0_1	Q8N3Y7	ENSG00000170786	short chain dehydrogenase/reductase family 16C, member 5	SDR16C5	Group enriched	esophagus,lung,skin,small intestine,stomach,tonsil
dd_Smed_v6_4849_0_1	Q6ZN16	ENSG00000180815	mitogen-activated protein kinase kinase kinase 15	MAP3K15	Tissue enriched	adrenal gland
dd_Smed_v6_485_0_1	Q8NHP8	ENSG00000151176	phospholipase B domain containing 2	PLBD2	Expressed in all tissues
dd_Smed_v6_4851_0_1	Q9H330	ENSG00000106771	transmembrane protein 245	TMEM245	Expressed in all tissues
dd_Smed_v6_487_0_1	P48507	ENSG00000023909	glutamate-cysteine ligase, modifier subunit	GCLM	Expressed in all tissues
dd_Smed_v6_488_0_1	P62820	ENSG00000138069	RAB1A, member RAS oncogene family	RAB1A	Expressed in all tissues
dd_Smed_v6_4894_0_1	Q96P53	ENSG00000139668	WD repeat and FYVE domain containing 2	WDFY2	Mixed
dd_Smed_v6_4901_0_1	P50416	ENSG00000110090	carnitine palmitoyltransferase 1A (liver)	CPT1A	Expressed in all tissues
dd_Smed_v6_491_0_1	P51149	ENSG00000075785	RAB7A, member RAS oncogene family	RAB7A	Expressed in all tissues
dd_Smed_v6_4918_0_1	Q9BVT8	ENSG00000164897	transmembrane and ubiquitin-like domain containing 1	TMUB1	Expressed in all tissues
dd_Smed_v6_492_0_1	Q8TBF2	ENSG00000157870	family with sequence similarity 213, member B	FAM213B	Expressed in all tissues
dd_Smed_v6_4925_0_1	Q6XPS3	ENSG00000132958	transmembrane phosphoinositide 3-phosphatase and tensin homolog 2	TPTE2	Tissue enriched	testis
dd_Smed_v6_4927_0_1	O75208	ENSG00000088682	coenzyme Q9	COQ9	Expressed in all tissues
dd_Smed_v6_4929_0_1	Q8TF05	ENSG00000154845	protein phosphatase 4, regulatory subunit 1	PPP4R1	Expressed in all tissues
dd_Smed_v6_4946_0_1	Q9NRZ5	ENSG00000026652	1-acylglycerol-3-phosphate O-acyltransferase 4	AGPAT4	Mixed
dd_Smed_v6_4947_0_1	Q3SYC2	ENSG00000166391	monoacylglycerol O-acyltransferase 2	MOGAT2	Group enriched	colon,duodenum,liver,rectum,small intestine
dd_Smed_v6_4970_0_1	P13686	ENSG00000102575	acid phosphatase 5, tartrate resistant	ACP5	Expressed in all tissues
dd_Smed_v6_4971_0_1	Q7Z5S9	ENSG00000164124	transmembrane protein 144	TMEM144	Expressed in all tissues
dd_Smed_v6_498_0_1	Q9Y365	ENSG00000214530	StAR-related lipid transfer (START) domain containing 10	STARD10	Expressed in all tissues
dd_Smed_v6_4992_0_1	Q86XD8	ENSG00000172671	zinc finger, AN1-type domain 4	ZFAND4	Tissue enriched	testis
dd_Smed_v6_4997_0_1	Q8TCQ1	ENSG00000145416	membrane-associated ring finger (C3HC4) 1, E3 ubiquitin protein ligase	2018-03-01	Mixed
dd_Smed_v6_5008_0_1	O14841	ENSG00000178814	5-oxoprolinase (ATP-hydrolysing)	OPLAH	Tissue enhanced	testis
dd_Smed_v6_5009_0_1	Q9BRG1	ENSG00000131475	vacuolar protein sorting 25 homolog (S. cerevisiae)	VPS25	Expressed in all tissues
dd_Smed_v6_5083_0_1	O95352	ENSG00000197548	autophagy related 7	ATG7	Expressed in all tissues
dd_Smed_v6_509_0_1	P15954	ENSG00000127184	cytochrome c oxidase subunit VIIc	COX7C	Expressed in all tissues
dd_Smed_v6_5135_0_1	P41236	ENSG00000184203	protein phosphatase 1, regulatory (inhibitor) subunit 2	PPP1R2	Expressed in all tissues
dd_Smed_v6_5143_0_1	Q13443	ENSG00000168615	ADAM metallopeptidase domain 9	ADAM9	Expressed in all tissues
dd_Smed_v6_5158_0_1	A0FGR9	ENSG00000158220	extended synaptotagmin-like protein 3	ESYT3	Tissue enhanced	lung, skin, thyroid gland
dd_Smed_v6_5175_0_1	O15118	ENSG00000141458	Niemann-Pick disease, type C1	NPC1	Expressed in all tissues
dd_Smed_v6_5184_0_1	Q9NUP1	ENSG00000186222	biogenesis of lysosomal organelles complex-1, subunit 4, cappuccino	BLOC1S4	Expressed in all tissues
dd_Smed_v6_5186_0_1	Q5QJ74	ENSG00000154114	tubulin folding cofactor E-like	TBCEL	Expressed in all tissues
dd_Smed_v6_5212_0_1	Q07890	ENSG00000100485	son of sevenless homolog 2 (Drosophila)	SOS2	Expressed in all tissues
dd_Smed_v6_522_0_1	P11233	ENSG00000006451	v-ral simian leukemia viral oncogene homolog A (ras related)	RALA	Expressed in all tissues
dd_Smed_v6_5220_0_1	Q96NU7	ENSG00000139344	amidohydrolase domain containing 1	AMDHD1	Tissue enhanced	liver
dd_Smed_v6_5229_0_1	Q9BZ23	ENSG00000125779	pantothenate kinase 2	PANK2	Expressed in all tissues
dd_Smed_v6_5238_0_1	Q6UXD7	ENSG00000169026	major facilitator superfamily domain containing 7	MFSD7	Mixed
dd_Smed_v6_526_0_1	P23526	ENSG00000101444	adenosylhomocysteinase	AHCY	Expressed in all tissues
dd_Smed_v6_5267_0_1	Q5VWJ9	ENSG00000148158	sorting nexin family member 30	SNX30	Expressed in all tissues
dd_Smed_v6_5274_0_1	Q9H1Z4	ENSG00000101940	WD repeat domain 13	WDR13	Expressed in all tissues
dd_Smed_v6_5314_0_1	Q9Y6D6	ENSG00000066777	ADP-ribosylation factor guanine nucleotide-exchange factor 1 (brefeldin A-inhibited)	ARFGEF1	Expressed in all tissues
dd_Smed_v6_5330_0_1	Q8NBH2	ENSG00000174611	kyphoscoliosis peptidase	KY	Tissue enhanced	skeletal muscle, skin
dd_Smed_v6_5369_0_1	Q7Z3C6	ENSG00000198925	autophagy related 9A	ATG9A	Expressed in all tissues
dd_Smed_v6_5400_0_1	O60826	ENSG00000101997	coiled-coil domain containing 22	CCDC22	Expressed in all tissues
dd_Smed_v6_5408_0_1	Q8N6F8	ENSG00000165171	Williams Beuren syndrome chromosome region 27	WBSCR27	Mixed
dd_Smed_v6_5416_0_1	Q9HCC9	ENSG00000159733	zinc finger, FYVE domain containing 28	ZFYVE28	Expressed in all tissues
dd_Smed_v6_542_0_1	P16435	ENSG00000127948	P450 (cytochrome) oxidoreductase	POR	Expressed in all tissues
dd_Smed_v6_5423_0_1	Q9BZF3	ENSG00000079156	oxysterol binding protein-like 6	OSBPL6	Mixed
dd_Smed_v6_545_0_1	O75348	ENSG00000136888	ATPase, H+ transporting, lysosomal 13kDa, V1 subunit G1	ATP6V1G1	Expressed in all tissues
dd_Smed_v6_5459_0_1	Q96E52	ENSG00000162600	OMA1 zinc metallopeptidase	OMA1	Expressed in all tissues
dd_Smed_v6_5473_0_1	Q96DX4	ENSG00000159579	ring finger and SPRY domain containing 1	RSPRY1	Expressed in all tissues
dd_Smed_v6_5476_0_1	Q8WWT9	ENSG00000158296	solute carrier family 13 (sodium-dependent dicarboxylate transporter), member 3	SLC13A3	Tissue enriched	kidney
dd_Smed_v6_5526_0_1	Q6ZP29	ENSG00000040487	PQ loop repeat containing 2	PQLC2	Expressed in all tissues
dd_Smed_v6_553_0_1	Q00341	ENSG00000115677	high density lipoprotein binding protein	HDLBP	Expressed in all tissues
dd_Smed_v6_5533_0_1	Q7Z3J2	ENSG00000103544	chromosome 16 open reading frame 62	C16orf62	Expressed in all tissues
dd_Smed_v6_5546_0_1	Q9NQ40	ENSG00000101276	solute carrier family 52 (riboflavin transporter), member 3	SLC52A3	Tissue enhanced	testis
dd_Smed_v6_5599_0_1	Q86TV6	ENSG00000165914	tetratricopeptide repeat domain 7B	TTC7B	Expressed in all tissues
dd_Smed_v6_56_0_1	P07900	ENSG00000080824	heat shock protein 90kDa alpha (cytosolic), class A member 1	HSP90AA1	Expressed in all tissues
dd_Smed_v6_5653_0_1	Q9NQL2	ENSG00000025039	Ras-related GTP binding D	RRAGD	Expressed in all tissues
dd_Smed_v6_5658_0_1	P23443	ENSG00000108443	ribosomal protein S6 kinase, 70kDa, polypeptide 1	RPS6KB1	Expressed in all tissues
dd_Smed_v6_567_0_1	P00167	ENSG00000166347	cytochrome b5 type A (microsomal)	CYB5A	Expressed in all tissues
dd_Smed_v6_5671_0_1	P55157	ENSG00000138823	microsomal triglyceride transfer protein	MTTP	Group enriched	duodenum,liver,small intestine
dd_Smed_v6_5686_0_1	Q9UHK6	ENSG00000242110	alpha-methylacyl-CoA racemase	AMACR	Expressed in all tissues
dd_Smed_v6_5691_0_1	Q63HM9	ENSG00000182836	phosphatidylinositol-specific phospholipase C, X domain containing 3	PLCXD3	Tissue enhanced	heart muscle, ovary
dd_Smed_v6_5696_0_1	O75352	ENSG00000129255	mannose-P-dolichol utilization defect 1	MPDU1	Expressed in all tissues
dd_Smed_v6_5702_0_1	Q9NY26	ENSG00000143570	solute carrier family 39 (zinc transporter), member 1	SLC39A1	Expressed in all tissues
dd_Smed_v6_576_0_1	P06865	ENSG00000213614	hexosaminidase A (alpha polypeptide)	HEXA	Expressed in all tissues
dd_Smed_v6_5786_0_1	Q8IVN8	ENSG00000164764	somatomedin B and thrombospondin, type 1 domain containing	SBSPON	Mixed
dd_Smed_v6_5787_0_1	Q3SY69	ENSG00000136010	aldehyde dehydrogenase 1 family, member L2	ALDH1L2	Tissue enhanced	pancreas
dd_Smed_v6_5800_0_1	Q04671	ENSG00000104044	oculocutaneous albinism II	OCA2	Tissue enhanced	skin, thyroid gland
dd_Smed_v6_581_0_1	O00743	ENSG00000119414	protein phosphatase 6, catalytic subunit	PPP6C	Expressed in all tissues
dd_Smed_v6_5810_0_1	A6NGC4	ENSG00000185561	TLC domain containing 2	TLCD2	Mixed
dd_Smed_v6_5815_0_1	Q96JC1	ENSG00000166887	vacuolar protein sorting 39 homolog (S. cerevisiae)	VPS39	Expressed in all tissues
dd_Smed_v6_5857_0_1	P63151	ENSG00000221914	protein phosphatase 2, regulatory subunit B, alpha	PPP2R2A	Expressed in all tissues
dd_Smed_v6_5867_0_1	P51659	ENSG00000133835	hydroxysteroid (17-beta) dehydrogenase 4	HSD17B4	Expressed in all tissues
dd_Smed_v6_5872_0_1	Q96DE0	ENSG00000198585	nudix (nucleoside diphosphate linked moiety X)-type motif 16	NUDT16	Expressed in all tissues
dd_Smed_v6_5883_0_1	Q96JH8	ENSG00000157927	Ras association and DIL domains	RADIL	Tissue enhanced	testis
dd_Smed_v6_5886_0_1	Q8WUJ1	ENSG00000167740	cytochrome b5 domain containing 2	CYB5D2	Expressed in all tissues
dd_Smed_v6_5888_0_1	Q8TDD5	ENSG00000055732	mucolipin 3	MCOLN3	Tissue enriched	adrenal gland
dd_Smed_v6_5939_0_1	O00291	ENSG00000127946	huntingtin interacting protein 1	HIP1	Expressed in all tissues
dd_Smed_v6_5954_0_1	O15431	ENSG00000136868	solute carrier family 31 (copper transporter), member 1	SLC31A1	Expressed in all tissues
dd_Smed_v6_5961_0_1	Q15276	ENSG00000029725	rabaptin, RAB GTPase binding effector protein 1	RABEP1	Expressed in all tissues
dd_Smed_v6_5977_0_1	Q8WUM0	ENSG00000069248	nucleoporin 133kDa	NUP133	Expressed in all tissues
dd_Smed_v6_5978_0_1	O94916	ENSG00000102908	nuclear factor of activated T-cells 5, tonicity-responsive	NFAT5	Expressed in all tissues
dd_Smed_v6_5986_0_1	Q9UPZ3	ENSG00000110756	Hermansky-Pudlak syndrome 5	HPS5	Expressed in all tissues
dd_Smed_v6_602_0_1	P61916	ENSG00000119655	Niemann-Pick disease, type C2	NPC2	Expressed in all tissues
dd_Smed_v6_6021_0_1	Q9HC38	ENSG00000167699	glyoxalase domain containing 4	GLOD4	Expressed in all tissues
dd_Smed_v6_6026_0_1	Q16635	ENSG00000102125	tafazzin	TAZ	Expressed in all tissues
dd_Smed_v6_6038_0_1	Q9NQH7	ENSG00000196236	X-prolyl aminopeptidase (aminopeptidase P) 3, putative	XPNPEP3	Expressed in all tissues
dd_Smed_v6_6039_0_1	P41240	ENSG00000103653	c-src tyrosine kinase	CSK	Expressed in all tissues
dd_Smed_v6_6045_0_1	Q9C0E8	ENSG00000144320	KIAA1715	KIAA1715	Expressed in all tissues
dd_Smed_v6_6055_0_1	Q6UW56	ENSG00000138085	all-trans retinoic acid-induced differentiation factor	ATRAID	Expressed in all tissues
dd_Smed_v6_606_1_1	Q32M88	ENSG00000142102	ATH1, acid trehalase-like 1 (yeast)	ATHL1	Expressed in all tissues
dd_Smed_v6_607_1_1	P30536	ENSG00000100300	translocator protein (18kDa)	TSPO	Expressed in all tissues
dd_Smed_v6_6077_0_1	Q8NFV4	ENSG00000106077	abhydrolase domain containing 11	ABHD11	Expressed in all tissues
dd_Smed_v6_6093_0_1	A4D0S4	ENSG00000091128	laminin, beta 4	LAMB4	Tissue enriched	skin
dd_Smed_v6_610_0_1	P63000	ENSG00000136238	ras-related C3 botulinum toxin substrate 1 (rho family, small GTP binding protein Rac1)	RAC1	Expressed in all tissues
dd_Smed_v6_6102_0_1	Q9UPR0	ENSG00000154822	phospholipase C-like 2	PLCL2	Expressed in all tissues
dd_Smed_v6_6107_0_1	Q9NUM4	ENSG00000106460	transmembrane protein 106B	TMEM106B	Expressed in all tissues
dd_Smed_v6_6117_0_1	Q5JWR5	ENSG00000083097	dopey family member 1	DOPEY1	Expressed in all tissues
dd_Smed_v6_6156_0_1	Q8IZD9	ENSG00000088538	dedicator of cytokinesis 3	DOCK3	Tissue enhanced	brain, thyroid gland
dd_Smed_v6_6159_0_1	Q9P2Y5	ENSG00000198382	UV radiation resistance associated	UVRAG	Expressed in all tissues
dd_Smed_v6_6168_0_1	P49354	ENSG00000168522	farnesyltransferase, CAAX box, alpha	FNTA	Expressed in all tissues
dd_Smed_v6_6175_0_1	Q5JSH3	ENSG00000131725	WD repeat domain 44	WDR44	Expressed in all tissues
dd_Smed_v6_6176_1_1	Q9H8W4	ENSG00000175895	pleckstrin homology domain containing, family F (with FYVE domain) member 2	PLEKHF2	Expressed in all tissues
dd_Smed_v6_623_0_1	P61160	ENSG00000138071	ARP2 actin-related protein 2 homolog (yeast)	ACTR2	Expressed in all tissues
dd_Smed_v6_6231_0_1	O95835	ENSG00000131023	large tumor suppressor kinase 1	LATS1	Expressed in all tissues
dd_Smed_v6_6236_0_1	P00813	ENSG00000196839	adenosine deaminase	ADA	Tissue enriched	duodenum
dd_Smed_v6_6249_0_1	Q9Y6T7	ENSG00000136267	diacylglycerol kinase, beta 90kDa	DGKB	Tissue enhanced	brain
dd_Smed_v6_6255_0_1	Q8IUC4	ENSG00000131941	rhophilin, Rho GTPase binding protein 2	RHPN2	Mixed
dd_Smed_v6_6256_0_1	Q99569	ENSG00000144283	plakophilin 4	PKP4	Expressed in all tissues
dd_Smed_v6_6268_0_1	Q96MD2	ENSG00000174206	chromosome 12 open reading frame 66	C12orf66	Expressed in all tissues
dd_Smed_v6_6292_0_1	P49914	ENSG00000136371	5,10-methenyltetrahydrofolate synthetase (5-formyltetrahydrofolate cyclo-ligase)	MTHFS	Expressed in all tissues
dd_Smed_v6_63_0_1	Q14019	ENSG00000103187	coactosin-like 1 (Dictyostelium)	COTL1	Expressed in all tissues
dd_Smed_v6_630_0_1	Q7LBR1	ENSG00000255112	charged multivesicular body protein 1B	CHMP1B	Expressed in all tissues
dd_Smed_v6_6305_0_1	O43934	ENSG00000092931	major facilitator superfamily domain containing 11	MFSD11	Expressed in all tissues
dd_Smed_v6_6306_0_1	Q4ZIN3	ENSG00000182087	transmembrane protein 259	TMEM259	Expressed in all tissues
dd_Smed_v6_6309_0_1	Q3T906	ENSG00000111670	N-acetylglucosamine-1-phosphate transferase, alpha and beta subunits	GNPTAB	Expressed in all tissues
dd_Smed_v6_6320_0_1	Q8N264	ENSG00000138639	Rho GTPase activating protein 24	ARHGAP24	Expressed in all tissues
dd_Smed_v6_6356_0_1	Q8N4J0	ENSG00000156017	chromosome 9 open reading frame 41	C9orf41	Expressed in all tissues
dd_Smed_v6_6377_0_1	Q2M2I8	ENSG00000115977	AP2 associated kinase 1	AAK1	Expressed in all tissues
dd_Smed_v6_6401_0_1	Q6ICG6	ENSG00000100364	KIAA0930	KIAA0930	Expressed in all tissues
dd_Smed_v6_6402_0_1	Q9Y6W3	ENSG00000131375	calpain 7	CAPN7	Expressed in all tissues
dd_Smed_v6_6427_0_1	Q9NV70	ENSG00000090989	exocyst complex component 1	EXOC1	Expressed in all tissues
dd_Smed_v6_643_0_1	Q9UJ70	ENSG00000124357	N-acetylglucosamine kinase	NAGK	Expressed in all tissues
dd_Smed_v6_6440_0_1	Q8N465	ENSG00000180902	D-2-hydroxyglutarate dehydrogenase	D2HGDH	Expressed in all tissues
dd_Smed_v6_6456_0_1	Q92643	ENSG00000142892	phosphatidylinositol glycan anchor biosynthesis, class K	PIGK	Expressed in all tissues
dd_Smed_v6_6476_0_1	Q14511	ENSG00000111859	neural precursor cell expressed, developmentally down-regulated 9	NEDD9	Expressed in all tissues
dd_Smed_v6_6484_0_1	Q8WUF8	ENSG00000113391	family with sequence similarity 172, member A	FAM172A	Expressed in all tissues
dd_Smed_v6_6504_0_1	Q6GYQ0	ENSG00000174373	Ral GTPase activating protein, alpha subunit 1 (catalytic)	RALGAPA1	Expressed in all tissues
dd_Smed_v6_6529_0_1	P48637	ENSG00000100983	glutathione synthetase	GSS	Expressed in all tissues
dd_Smed_v6_6537_0_1	Q8N573	ENSG00000164830	oxidation resistance 1	OXR1	Expressed in all tissues
dd_Smed_v6_6546_0_1	Q96BW1	ENSG00000094841	uracil phosphoribosyltransferase (FUR1) homolog (S. cerevisiae)	UPRT	Expressed in all tissues
dd_Smed_v6_6561_0_1	Q9NUB1	ENSG00000154930	acyl-CoA synthetase short-chain family member 1	ACSS1	Expressed in all tissues
dd_Smed_v6_6584_0_1	Q9Y2H2	ENSG00000198825	inositol polyphosphate-5-phosphatase F	INPP5F	Expressed in all tissues
dd_Smed_v6_6606_1_1	P27338	ENSG00000069535	monoamine oxidase B	MAOB	Mixed
dd_Smed_v6_6609_0_1	Q92887	ENSG00000023839	ATP-binding cassette, sub-family C (CFTR/MRP), member 2	ABCC2	Group enriched	duodenum,gallbladder,kidney,liver,small intestine
dd_Smed_v6_6619_0_1	Q7Z404	ENSG00000167608	transmembrane channel-like 4	TMC4	Mixed
dd_Smed_v6_662_0_1	P36969	ENSG00000167468	glutathione peroxidase 4	GPX4	Expressed in all tissues
dd_Smed_v6_6627_0_1	O95630	ENSG00000124356	STAM binding protein	STAMBP	Expressed in all tissues
dd_Smed_v6_6663_0_1	Q2M3M2	ENSG00000117834	solute carrier family 5 (sodium/sugar cotransporter), member 9	SLC5A9	Group enriched	duodenum,small intestine
dd_Smed_v6_667_0_1	P68036	ENSG00000185651	ubiquitin-conjugating enzyme E2L 3	UBE2L3	Expressed in all tissues
dd_Smed_v6_6683_0_1	Q9NY57	ENSG00000152953	serine/threonine kinase 32B	STK32B	Tissue enhanced	kidney
dd_Smed_v6_670_0_1	Q9P0S9	ENSG00000111843	transmembrane protein 14C	TMEM14C	Expressed in all tissues
dd_Smed_v6_6703_0_1	Q8TB61	ENSG00000157593	solute carrier family 35 (adenosine 3'-phospho 5'-phosphosulfate transporter), member B2	SLC35B2	Expressed in all tissues
dd_Smed_v6_6717_0_1	Q7L211	ENSG00000139826	abhydrolase domain containing 13	ABHD13	Expressed in all tissues
dd_Smed_v6_6719_0_1	P19174	ENSG00000124181	phospholipase C, gamma 1	PLCG1	Expressed in all tissues
dd_Smed_v6_6724_0_1	P43155	ENSG00000095321	carnitine O-acetyltransferase	CRAT	Expressed in all tissues
dd_Smed_v6_6738_0_1	Q8TBG4	ENSG00000164089	ethanolamine-phosphate phospho-lyase	ETNPPL	Group enriched	brain,liver,salivary gland
dd_Smed_v6_6745_0_1	P48506	ENSG00000001084	glutamate-cysteine ligase, catalytic subunit	GCLC	Expressed in all tissues
dd_Smed_v6_6796_0_1	Q99685	ENSG00000074416	monoglyceride lipase	MGLL	Expressed in all tissues
dd_Smed_v6_6817_0_1	Q2TAA5	ENSG00000253710	ALG11, alpha-1,2-mannosyltransferase	ALG11	Expressed in all tissues
dd_Smed_v6_6827_0_1	P49189	ENSG00000143149	aldehyde dehydrogenase 9 family, member A1	ALDH9A1	Expressed in all tissues
dd_Smed_v6_6831_0_1	O15229	ENSG00000117009	kynurenine 3-monooxygenase (kynurenine 3-hydroxylase)	KMO	Tissue enhanced	kidney, liver
dd_Smed_v6_6833_0_1	Q96SZ5	ENSG00000181915	2-aminoethanethiol (cysteamine) dioxygenase	ADO	Expressed in all tissues
dd_Smed_v6_6837_0_1	P0C025	ENSG00000186364	nudix (nucleoside diphosphate linked moiety X)-type motif 17	NUDT17	Mixed
dd_Smed_v6_684_0_1	P21281	ENSG00000147416	ATPase, H+ transporting, lysosomal 56/58kDa, V1 subunit B2	ATP6V1B2	Expressed in all tissues
dd_Smed_v6_6848_0_1	Q14542	ENSG00000174669	solute carrier family 29 (equilibrative nucleoside transporter), member 2	SLC29A2	Tissue enriched	skeletal muscle
dd_Smed_v6_687_0_1	P30153	ENSG00000105568	protein phosphatase 2, regulatory subunit A, alpha	PPP2R1A	Expressed in all tissues
dd_Smed_v6_6888_0_1	Q9BZH6	ENSG00000120008	WD repeat domain 11	WDR11	Expressed in all tissues
dd_Smed_v6_690_0_1	Q9NYB9	ENSG00000138443	abl-interactor 2	ABI2	Expressed in all tissues
dd_Smed_v6_6956_0_1	Q05932	ENSG00000136877	folylpolyglutamate synthase	FPGS	Expressed in all tissues
dd_Smed_v6_699_0_1	Q9UIJ7	ENSG00000147853	adenylate kinase 3	AK3	Expressed in all tissues
dd_Smed_v6_7000_0_1	Q9BVM4	ENSG00000134864	gamma-glutamylamine cyclotransferase	GGACT	Tissue enriched	kidney
dd_Smed_v6_7032_0_1	Q9UKM7	ENSG00000177239	mannosidase, alpha, class 1B, member 1	MAN1B1	Expressed in all tissues
dd_Smed_v6_7058_0_1	Q76I76	ENSG00000141298	slingshot protein phosphatase 2	SSH2	Expressed in all tissues
dd_Smed_v6_7072_0_1	Q9NVG8	ENSG00000107021	TBC1 domain family, member 13	TBC1D13	Expressed in all tissues
dd_Smed_v6_7077_0_1	Q6NUT3	ENSG00000161091	major facilitator superfamily domain containing 12	MFSD12	Expressed in all tissues
dd_Smed_v6_7096_0_1	Q96JB6	ENSG00000138131	lysyl oxidase-like 4	LOXL4	Mixed
dd_Smed_v6_7100_0_1	Q8NE00	ENSG00000109066	transmembrane protein 104	TMEM104	Expressed in all tissues
dd_Smed_v6_7104_0_1	Q86WA9	ENSG00000181045	solute carrier family 26 (anion exchanger), member 11	SLC26A11	Expressed in all tissues
dd_Smed_v6_7105_0_1	Q13425	ENSG00000168807	syntrophin, beta 2 (dystrophin-associated protein A1, 59kDa, basic component 2)	SNTB2	Expressed in all tissues
dd_Smed_v6_7121_0_1	Q8NFF2	ENSG00000140090	solute carrier family 24 (sodium/potassium/calcium exchanger), member 4	SLC24A4	Tissue enhanced	brain
dd_Smed_v6_7143_0_1	Q9H8X2	ENSG00000127080	inositol 1,3,4,5,6-pentakisphosphate 2-kinase	IPPK	Expressed in all tissues
dd_Smed_v6_7144_0_1	Q96EM0	ENSG00000126790	L-3-hydroxyproline dehydratase (trans-)	L3HYPDH	Expressed in all tissues
dd_Smed_v6_7147_0_1	P07741	ENSG00000198931	adenine phosphoribosyltransferase	APRT	Expressed in all tissues
dd_Smed_v6_7179_0_1	Q6XZF7	ENSG00000107554	dynamin binding protein	DNMBP	Expressed in all tissues
dd_Smed_v6_7183_0_1	Q92696	ENSG00000100949	Rab geranylgeranyltransferase, alpha subunit	RABGGTA	Expressed in all tissues
dd_Smed_v6_7200_0_1	P21673	ENSG00000130066	spermidine/spermine N1-acetyltransferase 1	SAT1	Expressed in all tissues
dd_Smed_v6_7205_0_1	O75838	ENSG00000136425	calcium and integrin binding family member 2	CIB2	Mixed
dd_Smed_v6_7206_0_1	Q8WVX9	ENSG00000197601	fatty acyl CoA reductase 1	FAR1	Expressed in all tissues
dd_Smed_v6_7220_0_1	P59282	ENSG00000179636	tubulin polymerization-promoting protein family member 2	TPPP2	Tissue enriched	testis
dd_Smed_v6_7235_0_1	O95749	ENSG00000152904	geranylgeranyl diphosphate synthase 1	GGPS1	Expressed in all tissues
dd_Smed_v6_725_0_1	Q16836	ENSG00000138796	hydroxyacyl-CoA dehydrogenase	HADH	Expressed in all tissues
dd_Smed_v6_7286_0_1	Q8NCC3	ENSG00000103066	phospholipase A2, group XV	PLA2G15	Expressed in all tissues
dd_Smed_v6_7336_0_1	Q92562	ENSG00000112367	FIG4 homolog, SAC1 lipid phosphatase domain containing (S. cerevisiae)	FIG4	Expressed in all tissues
dd_Smed_v6_7343_0_1	Q5S007	ENSG00000188906	leucine-rich repeat kinase 2	LRRK2	Expressed in all tissues
dd_Smed_v6_7354_0_1	Q13286	ENSG00000188603	ceroid-lipofuscinosis, neuronal 3	CLN3	Expressed in all tissues
dd_Smed_v6_7359_0_1	P11047	ENSG00000135862	laminin, gamma 1 (formerly LAMB2)	LAMC1	Expressed in all tissues
dd_Smed_v6_7384_0_1	Q96HY7	ENSG00000181192	dehydrogenase E1 and transketolase domain containing 1	DHTKD1	Expressed in all tissues
dd_Smed_v6_741_1_1	P07954	ENSG00000091483	fumarate hydratase	FH	Expressed in all tissues
dd_Smed_v6_7470_0_1	P10071	ENSG00000106571	GLI family zinc finger 3	GLI3	Mixed
dd_Smed_v6_749_0_1	P13796	ENSG00000136167	lymphocyte cytosolic protein 1 (L-plastin)	LCP1	Expressed in all tissues
dd_Smed_v6_7593_0_1	O94818	ENSG00000101746	nucleolar protein 4	NOL4	Tissue enhanced	brain, testis
dd_Smed_v6_7643_0_1	Q9UQ10	ENSG00000104808	dihydrodiol dehydrogenase (dimeric)	DHDH	Group enriched	duodenum,kidney,small intestine
dd_Smed_v6_7655_0_1	Q96JX3	ENSG00000122335	serine active site containing 1	SERAC1	Expressed in all tissues
dd_Smed_v6_7676_0_1	Q9Y6A2	ENSG00000036530	cytochrome P450, family 46, subfamily A, polypeptide 1	CYP46A1	Tissue enriched	brain
dd_Smed_v6_7677_0_1	P61289	ENSG00000131467	proteasome (prosome, macropain) activator subunit 3 (PA28 gamma; Ki)	PSME3	Expressed in all tissues
dd_Smed_v6_7720_0_1	Q9C0B5	ENSG00000156599	zinc finger, DHHC-type containing 5	ZDHHC5	Expressed in all tissues
dd_Smed_v6_7725_0_1	O00750	ENSG00000133056	phosphatidylinositol-4-phosphate 3-kinase, catalytic subunit type 2 beta	PIK3C2B	Expressed in all tissues
dd_Smed_v6_7733_0_1	P30988	ENSG00000004948	calcitonin receptor	CALCR	Tissue enhanced	kidney
dd_Smed_v6_7766_0_1	O75897	ENSG00000198075	sulfotransferase family, cytosolic, 1C, member 4	SULT1C4	Tissue enhanced	gallbladder
dd_Smed_v6_7775_0_1	Q9NUY8	ENSG00000036054	TBC1 domain family, member 23	TBC1D23	Expressed in all tissues
dd_Smed_v6_7779_0_1	O00308	ENSG00000198373	WW domain containing E3 ubiquitin protein ligase 2	WWP2	Expressed in all tissues
dd_Smed_v6_7794_0_1	Q68DK2	ENSG00000072121	zinc finger, FYVE domain containing 26	ZFYVE26	Expressed in all tissues
dd_Smed_v6_7796_0_1	Q8WVD5	ENSG00000110315	ring finger protein 141	RNF141	Expressed in all tissues
dd_Smed_v6_7803_0_1	Q8N2K0	ENSG00000100997	abhydrolase domain containing 12	ABHD12	Expressed in all tissues
dd_Smed_v6_781_0_1	Q9BPX5	ENSG00000136950	actin related protein 2/3 complex, subunit 5-like	ARPC5L	Expressed in all tissues
dd_Smed_v6_7835_0_1	Q9GZR5	ENSG00000118402	ELOVL fatty acid elongase 4	ELOVL4	Tissue enhanced	skin
dd_Smed_v6_785_0_1	P10619	ENSG00000064601	cathepsin A	CTSA	Expressed in all tissues
dd_Smed_v6_7852_0_1	Q9UBY8	ENSG00000182372	ceroid-lipofuscinosis, neuronal 8 (epilepsy, progressive with mental retardation)	CLN8	Expressed in all tissues
dd_Smed_v6_786_0_1	P00491	ENSG00000198805	purine nucleoside phosphorylase	PNP	Expressed in all tissues
dd_Smed_v6_790_0_1	P56730	ENSG00000164099	protease, serine, 12 (neurotrypsin, motopsin)	PRSS12	Mixed
dd_Smed_v6_7913_0_1	Q9H3S4	ENSG00000196511	thiamin pyrophosphokinase 1	TPK1	Expressed in all tissues
dd_Smed_v6_7924_0_1	P24043	ENSG00000196569	laminin, alpha 2	LAMA2	Tissue enhanced	placenta
dd_Smed_v6_7938_0_1	Q15853	ENSG00000105698	upstream transcription factor 2, c-fos interacting	USF2	Expressed in all tissues
dd_Smed_v6_7943_0_1	Q75T13	ENSG00000197121	post-GPI attachment to proteins 1	PGAP1	Mixed
dd_Smed_v6_8002_0_1	Q9BQK8	ENSG00000132793	lipin 3	LPIN3	Mixed
dd_Smed_v6_8029_0_1	Q5SRE7	ENSG00000175287	phytanoyl-CoA dioxygenase domain containing 1	PHYHD1	Expressed in all tissues
dd_Smed_v6_81_0_1	P07858	ENSG00000164733	cathepsin B	CTSB	Expressed in all tissues
dd_Smed_v6_8101_0_1	P35241	ENSG00000137710	radixin	RDX	Expressed in all tissues
dd_Smed_v6_8116_0_1	P13798	ENSG00000164062	acylaminoacyl-peptide hydrolase	APEH	Expressed in all tissues
dd_Smed_v6_8124_0_1	P27037	ENSG00000121989	activin A receptor, type IIA	ACVR2A	Expressed in all tissues
dd_Smed_v6_8150_0_1	Q9BXS9	ENSG00000225697	solute carrier family 26 (anion exchanger), member 6	SLC26A6	Expressed in all tissues
dd_Smed_v6_8166_0_1	O00623	ENSG00000108733	peroxisomal biogenesis factor 12	PEX12	Expressed in all tissues
dd_Smed_v6_819_0_1	O95178	ENSG00000090266	NADH dehydrogenase (ubiquinone) 1 beta subcomplex, 2, 8kDa	NDUFB2	Expressed in all tissues
dd_Smed_v6_8255_0_1	Q8WWN8	ENSG00000120318	ArfGAP with RhoGAP domain, ankyrin repeat and PH domain 3	ARAP3	Expressed in all tissues
dd_Smed_v6_8303_0_1	P49757	ENSG00000133961	numb homolog (Drosophila)	NUMB	Expressed in all tissues
dd_Smed_v6_8349_0_1	O60733	ENSG00000184381	phospholipase A2, group VI (cytosolic, calcium-independent)	PLA2G6	Expressed in all tissues
dd_Smed_v6_835_0_1	O60749	ENSG00000205302	sorting nexin 2	SNX2	Expressed in all tissues
dd_Smed_v6_8378_0_1	Q96G97	ENSG00000168000	Berardinelli-Seip congenital lipodystrophy 2 (seipin)	BSCL2	Expressed in all tissues
dd_Smed_v6_838_0_1	Q96HR9	ENSG00000115255	receptor accessory protein 6	REEP6	Tissue enhanced	duodenum, liver, small intestine, testis
dd_Smed_v6_8406_0_1	P29120	ENSG00000175426	proprotein convertase subtilisin/kexin type 1	PCSK1	Tissue enhanced	brain
dd_Smed_v6_8422_0_1	Q9BTY2	ENSG00000001036	fucosidase, alpha-L- 2, plasma	FUCA2	Expressed in all tissues
dd_Smed_v6_8443_0_1	Q13625	ENSG00000143514	tumor protein p53 binding protein, 2	TP53BP2	Expressed in all tissues
dd_Smed_v6_845_0_1	Q96KJ9	ENSG00000131055	cytochrome c oxidase subunit IV isoform 2 (lung)	COX4I2	Tissue enhanced	placenta
dd_Smed_v6_8535_0_1	O14678	ENSG00000119688	ATP-binding cassette, sub-family D (ALD), member 4	ABCD4	Expressed in all tissues
dd_Smed_v6_859_0_1	P04040	ENSG00000121691	catalase	CAT	Expressed in all tissues
dd_Smed_v6_8591_0_1	Q9UBM7	ENSG00000172893	7-dehydrocholesterol reductase	DHCR7	Expressed in all tissues
dd_Smed_v6_863_0_1	P40939	ENSG00000084754	hydroxyacyl-CoA dehydrogenase/3-ketoacyl-CoA thiolase/enoyl-CoA hydratase (trifunctional protein), alpha subunit	HADHA	Expressed in all tissues
dd_Smed_v6_8642_0_1	Q12967	ENSG00000160271	ral guanine nucleotide dissociation stimulator	RALGDS	Expressed in all tissues
dd_Smed_v6_867_0_1	Q15907	ENSG00000185236	RAB11B, member RAS oncogene family	RAB11B	Expressed in all tissues
dd_Smed_v6_8687_0_1	Q96MS3	ENSG00000151948	glycosyltransferase 1 domain containing 1	GLT1D1	Tissue enhanced	bone marrow, testis
dd_Smed_v6_869_0_1	P19971	ENSG00000025708	thymidine phosphorylase	TYMP	Expressed in all tissues
dd_Smed_v6_870_0_1	Q5T1M5	ENSG00000119321	FK506 binding protein 15, 133kDa	FKBP15	Expressed in all tissues
dd_Smed_v6_8735_0_1	Q8TEA7	ENSG00000145348	TBC1 domain containing kinase	TBCK	Expressed in all tissues
dd_Smed_v6_8766_0_1	Q8TDX5	ENSG00000153086	aminocarboxymuconate semialdehyde decarboxylase	ACMSD	Group enriched	kidney,liver
dd_Smed_v6_8767_0_1	Q9UBQ7	ENSG00000137106	glyoxylate reductase/hydroxypyruvate reductase	GRHPR	Expressed in all tissues
dd_Smed_v6_8771_0_1	Q9NQG7	ENSG00000100099	Hermansky-Pudlak syndrome 4	HPS4	Expressed in all tissues
dd_Smed_v6_8774_0_1	Q96D31	ENSG00000182500	ORAI calcium release-activated calcium modulator 1	ORAI1	Expressed in all tissues
dd_Smed_v6_8779_0_1	Q92824	ENSG00000099139	proprotein convertase subtilisin/kexin type 5	PCSK5	Mixed
dd_Smed_v6_8800_0_1	Q14849	ENSG00000131748	StAR-related lipid transfer (START) domain containing 3	STARD3	Expressed in all tissues
dd_Smed_v6_8805_0_1	A4D1U4	ENSG00000257093	KIAA1147	KIAA1147	Expressed in all tissues
dd_Smed_v6_8868_0_1	Q86VX9	ENSG00000164077	MON1 secretory trafficking family member A	MON1A	Expressed in all tissues
dd_Smed_v6_9028_0_1	P57789	ENSG00000100433	potassium channel, subfamily K, member 10	KCNK10	Tissue enhanced	brain, duodenum
dd_Smed_v6_9076_0_1	Q5TDP6	ENSG00000146166	lengsin, lens protein with glutamine synthetase domain	LGSN	Tissue enhanced	kidney, liver, placenta
dd_Smed_v6_9091_0_1	O60291	ENSG00000102858	mahogunin ring finger 1, E3 ubiquitin protein ligase	MGRN1	Expressed in all tissues
dd_Smed_v6_9107_0_1	O95045	ENSG00000007001	uridine phosphorylase 2	UPP2	Tissue enriched	kidney
dd_Smed_v6_9133_0_1	Q9Y6P5	ENSG00000080546	sestrin 1	SESN1	Expressed in all tissues
dd_Smed_v6_9160_0_1	Q8WZ79	ENSG00000137976	deoxyribonuclease II beta	DNASE2B	Tissue enriched	salivary gland
dd_Smed_v6_9198_0_1	Q8WU67	ENSG00000158201	abhydrolase domain containing 3	ABHD3	Expressed in all tissues
dd_Smed_v6_9232_0_1	Q10469	ENSG00000168282	mannosyl (alpha-1,6-)-glycoprotein beta-1,2-N-acetylglucosaminyltransferase	MGAT2	Mixed
dd_Smed_v6_927_1_1	Q14254	ENSG00000132589	flotillin 2	FLOT2	Expressed in all tissues
dd_Smed_v6_9329_0_1	P53667	ENSG00000106683	LIM domain kinase 1	LIMK1	Expressed in all tissues
dd_Smed_v6_9355_0_1	Q8IYS0	ENSG00000178075	GRAM domain containing 1C	GRAMD1C	Mixed
dd_Smed_v6_9401_0_1	Q9UGH3	ENSG00000089057	solute carrier family 23 (ascorbic acid transporter), member 2	SLC23A2	Expressed in all tissues
dd_Smed_v6_9405_0_1	Q8N159	ENSG00000161653	N-acetylglutamate synthase	NAGS	Tissue enhanced	duodenum, small intestine
dd_Smed_v6_9489_0_1	Q96IF1	ENSG00000129474	ajuba LIM protein	AJUBA	Tissue enhanced	skin
dd_Smed_v6_9490_0_1	Q7L591	ENSG00000146094	docking protein 3	DOK3	Expressed in all tissues
dd_Smed_v6_94979_0_1	P25398	ENSG00000112306	ribosomal protein S12	RPS12	Expressed in all tissues
dd_Smed_v6_9556_0_1	Q9UPQ8	ENSG00000175283	dolichol kinase	DOLK	Expressed in all tissues
dd_Smed_v6_959_0_1	P38606	ENSG00000114573	ATPase, H+ transporting, lysosomal 70kDa, V1 subunit A	ATP6V1A	Expressed in all tissues
dd_Smed_v6_960_0_1	Q9NNW7	ENSG00000184470	thioredoxin reductase 2	TXNRD2	Expressed in all tissues
dd_Smed_v6_962_0_1	Q96TA2	ENSG00000136758	YME1-like 1 ATPase	YME1L1	Expressed in all tissues
dd_Smed_v6_967_0_1	Q9NPE3	ENSG00000182117	NOP10 ribonucleoprotein	NOP10	Expressed in all tissues
dd_Smed_v6_973_0_1	Q9UJA9	ENSG00000112796	ectonucleotide pyrophosphatase/phosphodiesterase 5 (putative)	ENPP5	Tissue enhanced	thyroid gland
dd_Smed_v6_975_0_1	Q9UKR3	ENSG00000167759	kallikrein-related peptidase 13	KLK13	Tissue enriched	esophagus
dd_Smed_v6_9762_0_1	Q9NVC3	ENSG00000103042	solute carrier family 38, member 7	SLC38A7	Expressed in all tissues
dd_Smed_v6_978_0_1	Q92747	ENSG00000241685	actin related protein 2/3 complex, subunit 1A, 41kDa	ARPC1A	Expressed in all tissues
dd_Smed_v6_9814_0_1	Q7Z3Q1	ENSG00000139508	solute carrier family 46, member 3	SLC46A3	Expressed in all tissues
dd_Smed_v6_9911_0_1	Q9P055	ENSG00000050130	JNK1/MAPK8-associated membrane protein	JKAMP	Expressed in all tissues
dd_Smed_v6_9932_0_1	Q05469	ENSG00000079435	lipase, hormone-sensitive	LIPE	Tissue enriched	adipose tissue

## Sheet: F7SD1-B. HPA_results_5561_all
dd_Smed_v6_ID	UniProtKB_ID	ensg_id	description	display_name	category	elevated_tissues
dd_Smed_v6_10001_0_1	P49842	ENSG00000204344	serine/threonine kinase 19	STK19	Expressed in all tissues
dd_Smed_v6_10002_0_1	Q9UJJ9	ENSG00000090581	N-acetylglucosamine-1-phosphate transferase, gamma subunit	GNPTG	Expressed in all tissues
dd_Smed_v6_10003_0_1	Q96JJ7	ENSG00000166479	thioredoxin-related transmembrane protein 3	TMX3	Expressed in all tissues
dd_Smed_v6_10006_0_1	Q9UJJ7	ENSG00000007376	RNA pseudouridylate synthase domain containing 1	RPUSD1	Expressed in all tissues
dd_Smed_v6_1001_0_1	Q15459	ENSG00000099995	splicing factor 3a, subunit 1, 120kDa	SF3A1	Expressed in all tissues
dd_Smed_v6_10011_0_1	Q9UPQ0	ENSG00000064042	LIM and calponin homology domains 1	LIMCH1	Mixed
dd_Smed_v6_10016_0_1	Q8NF64	ENSG00000122515	zinc finger, MIZ-type containing 2	ZMIZ2	Expressed in all tissues
dd_Smed_v6_10018_0_1	O43156	ENSG00000101407	TELO2 interacting protein 1	TTI1	Expressed in all tissues
dd_Smed_v6_10019_0_1	O76064	ENSG00000112130	ring finger protein 8, E3 ubiquitin protein ligase	RNF8	Expressed in all tissues
dd_Smed_v6_1002_0_1	Q00796	ENSG00000140263	sorbitol dehydrogenase	SORD	Group enriched	kidney,liver,prostate,thyroid gland
dd_Smed_v6_10022_0_1	Q9NQQ7	ENSG00000080189	solute carrier family 35 (GDP-fucose transporter), member C2	SLC35C2	Expressed in all tissues
dd_Smed_v6_10027_0_1	Q9H7Z6	ENSG00000103510	K(lysine) acetyltransferase 8	KAT8	Expressed in all tissues
dd_Smed_v6_10028_0_1	Q7Z624	ENSG00000143919	calmodulin-lysine N-methyltransferase	CAMKMT	Expressed in all tissues
dd_Smed_v6_10030_0_1	O75554	ENSG00000120688	WW domain binding protein 4	WBP4	Expressed in all tissues
dd_Smed_v6_10031_0_1	Q9UBT2	ENSG00000126261	ubiquitin-like modifier activating enzyme 2	UBA2	Expressed in all tissues
dd_Smed_v6_10032_0_1	Q8WVS4	ENSG00000126870	WD repeat domain 60	WDR60	Expressed in all tissues
dd_Smed_v6_10034_0_1	Q96HW7	ENSG00000149262	integrator complex subunit 4	INTS4	Expressed in all tissues
dd_Smed_v6_10038_0_1	O60315	ENSG00000169554	zinc finger E-box binding homeobox 2	ZEB2	Expressed in all tissues
dd_Smed_v6_10039_0_1	Q8N2R0	ENSG00000164920	odd-skipped related transciption factor 2	OSR2	Tissue enhanced	endometrium, fallopian tube
dd_Smed_v6_10047_0_1	Q96NB1	ENSG00000133393	FGFR1OP N-terminal like	FOPNL	Expressed in all tissues
dd_Smed_v6_10050_0_1	Q96A57	ENSG00000089063	transmembrane protein 230	TMEM230	Expressed in all tissues
dd_Smed_v6_10051_0_1	Q9BX79	ENSG00000137868	stimulated by retinoic acid 6	STRA6	Tissue enhanced	placenta
dd_Smed_v6_100524_0_1	P02647	ENSG00000118137	apolipoprotein A-I	APOA1	Group enriched	duodenum,liver,small intestine
dd_Smed_v6_10054_0_1	Q99614	ENSG00000113312	tetratricopeptide repeat domain 1	TTC1	Expressed in all tissues
dd_Smed_v6_10056_0_1	Q8IXW5	ENSG00000122484	RNA polymerase II associated protein 2	RPAP2	Expressed in all tissues
dd_Smed_v6_100573_0_1	Q6ZMK1	ENSG00000187954	cysteine/histidine-rich 1	CYHR1	Expressed in all tissues
dd_Smed_v6_10058_0_1	Q9ULG3	ENSG00000114656	KIAA1257	KIAA1257	Tissue enriched	testis
dd_Smed_v6_10060_0_1	Q6P5X5	ENSG00000242259	chromosome 22 open reading frame 39	C22orf39	Expressed in all tissues
dd_Smed_v6_10064_0_1	P32780	ENSG00000110768	general transcription factor IIH, polypeptide 1, 62kDa	GTF2H1	Expressed in all tissues
dd_Smed_v6_10065_0_1	O60318	ENSG00000160294	minichromosome maintenance complex component 3 associated protein	MCM3AP	Expressed in all tissues
dd_Smed_v6_10066_0_1	O60447	ENSG00000067208	ecotropic viral integration site 5	EVI5	Expressed in all tissues
dd_Smed_v6_10068_0_1	Q9NRN9	ENSG00000138382	methyltransferase like 5	METTL5	Expressed in all tissues
dd_Smed_v6_10070_0_1	Q9UNA1	ENSG00000145819	Rho GTPase activating protein 26	ARHGAP26	Expressed in all tissues
dd_Smed_v6_10072_0_1	Q3KR16	ENSG00000008323	pleckstrin homology domain containing, family G (with RhoGef domain) member 6	PLEKHG6	Tissue enhanced	small intestine
dd_Smed_v6_10074_0_1	Q9BR09	ENSG00000124257	neuralized E3 ubiquitin protein ligase 2	NEURL2	Mixed
dd_Smed_v6_10075_0_1	P23352	ENSG00000011201	Kallmann syndrome 1 sequence	KAL1	Tissue enhanced	lung
dd_Smed_v6_10078_0_1	Q9Y2M0	ENSG00000198690	FANCD2/FANCI-associated nuclease 1	FAN1	Expressed in all tissues
dd_Smed_v6_10079_0_1	Q9H0C1	ENSG00000066185	zinc finger, MYND-type containing 12	ZMYND12	Tissue enhanced	fallopian tube, testis
dd_Smed_v6_10086_0_1	Q9C099	ENSG00000133739	leucine rich repeat and coiled-coil centrosomal protein 1	LRRCC1	Mixed
dd_Smed_v6_10087_0_1	Q3MIX3	ENSG00000173137	aarF domain containing kinase 5	ADCK5	Expressed in all tissues
dd_Smed_v6_1009_0_1	Q9NUP9	ENSG00000148943	lin-7 homolog C (C. elegans)	LIN7C	Expressed in all tissues
dd_Smed_v6_10092_0_1	P25490	ENSG00000100811	YY1 transcription factor	YY1	Expressed in all tissues
dd_Smed_v6_10093_0_1	Q96FZ2	ENSG00000183624	5-hydroxymethylcytosine (hmC) binding, ES cell-specific	HMCES	Expressed in all tissues
dd_Smed_v6_10095_0_1	Q5H8A4	ENSG00000174227	phosphatidylinositol glycan anchor biosynthesis, class G	PIGG	Expressed in all tissues
dd_Smed_v6_10096_0_1	Q96SY0	ENSG00000138614	von Willebrand factor A domain containing 9	VWA9	Expressed in all tissues
dd_Smed_v6_101_0_1	O95925	ENSG00000101448	epididymal peptidase inhibitor	EPPIN	Tissue enriched	testis
dd_Smed_v6_101_0_1	O95925	ENSG00000249139	EPPIN-WFDC6 readthrough	EPPIN-WFDC6	Tissue enriched	testis
dd_Smed_v6_10102_0_1	Q5VZV1	ENSG00000139780	methyltransferase like 21C	METTL21C	Tissue enhanced	placenta, prostate
dd_Smed_v6_10107_0_1	Q9NXC5	ENSG00000164654	missing oocyte, meiosis regulator, homolog (Drosophila)	MIOS	Expressed in all tissues
dd_Smed_v6_10108_0_1	P42285	ENSG00000039123	superkiller viralicidic activity 2-like 2 (S. cerevisiae)	SKIV2L2	Expressed in all tissues
dd_Smed_v6_10110_0_1	Q9UPT9	ENSG00000124422	ubiquitin specific peptidase 22	USP22	Expressed in all tissues
dd_Smed_v6_10113_0_1	Q9NVX2	ENSG00000073536	notchless homolog 1 (Drosophila)	NLE1	Expressed in all tissues
dd_Smed_v6_10119_0_1	P54132	ENSG00000197299	Bloom syndrome, RecQ helicase-like	BLM	Tissue enriched	salivary gland
dd_Smed_v6_1012_0_1	O95478	ENSG00000164346	NSA2 ribosome biogenesis homolog (S. cerevisiae)	NSA2	Expressed in all tissues
dd_Smed_v6_10121_0_1	Q5TEA3	ENSG00000088854	chromosome 20 open reading frame 194	C20orf194	Expressed in all tissues
dd_Smed_v6_10124_0_1	Q86X45	ENSG00000129295	leucine rich repeat containing 6	LRRC6	Tissue enhanced	fallopian tube, testis
dd_Smed_v6_10129_0_1	Q9Y5B8	ENSG00000143156	NME/NM23 family member 7	NME7	Expressed in all tissues
dd_Smed_v6_10132_0_1	Q96Q35	ENSG00000155749	amyotrophic lateral sclerosis 2 (juvenile) chromosome region, candidate 12	ALS2CR12	Tissue enhanced	fallopian tube, testis
dd_Smed_v6_10133_0_1	Q9NVP1	ENSG00000088205	DEAD (Asp-Glu-Ala-Asp) box polypeptide 18	DDX18	Expressed in all tissues
dd_Smed_v6_10136_0_1	A4D1F6	ENSG00000240720	leucine-rich repeats and death domain containing 1	LRRD1	Tissue enriched	testis
dd_Smed_v6_10140_0_1	Q8IYT3	ENSG00000120262	coiled-coil domain containing 170	CCDC170	Tissue enriched	fallopian tube
dd_Smed_v6_10141_0_1	Q9NV64	ENSG00000176142	transmembrane protein 39A	TMEM39A	Expressed in all tissues
dd_Smed_v6_10144_0_1	Q86SG6	ENSG00000160602	NIMA-related kinase 8	NEK8	Mixed
dd_Smed_v6_10145_0_1	Q9BRB3	ENSG00000007541	phosphatidylinositol glycan anchor biosynthesis, class Q	PIGQ	Expressed in all tissues
dd_Smed_v6_10148_0_1	P15056	ENSG00000157764	v-raf murine sarcoma viral oncogene homolog B	BRAF	Expressed in all tissues
dd_Smed_v6_10149_0_1	O43791	ENSG00000121067	speckle-type POZ protein	SPOP	Expressed in all tissues
dd_Smed_v6_10152_0_1	Q92949	ENSG00000129654	forkhead box J1	FOXJ1	Tissue enriched	fallopian tube
dd_Smed_v6_10158_0_1	H3BMG3	ENSG00000240204	small lysine-rich protein 1	SMKR1	Tissue enriched	testis
dd_Smed_v6_1016_0_1	P61165	ENSG00000134825	transmembrane protein 258	TMEM258	Expressed in all tissues
dd_Smed_v6_10175_0_1	Q8IY45	ENSG00000151743	antagonist of mitotic exit network 1 homolog (S. cerevisiae)	AMN1	Expressed in all tissues
dd_Smed_v6_10180_0_1	O15213	ENSG00000227057	WD repeat domain 46	WDR46	Expressed in all tissues
dd_Smed_v6_10183_0_1	Q96Q11	ENSG00000072756	tRNA nucleotidyl transferase, CCA-adding, 1	TRNT1	Expressed in all tissues
dd_Smed_v6_10186_0_1	Q9BXC9	ENSG00000125124	Bardet-Biedl syndrome 2	BBS2	Expressed in all tissues
dd_Smed_v6_10192_0_1	Q9P2U7	ENSG00000104888	solute carrier family 17 (vesicular glutamate transporter), member 7	SLC17A7	Tissue enriched	brain
dd_Smed_v6_10198_0_1	O15234	ENSG00000108349	cancer susceptibility candidate 3	CASC3	Expressed in all tissues
dd_Smed_v6_10199_0_1	Q3KNW5	ENSG00000145283	solute carrier family 10 (sodium/bile acid cotransporter), member 6	SLC10A6	Group enriched	adipose tissue,esophagus,skin,testis
dd_Smed_v6_1020_0_1	P15735	ENSG00000156873	phosphorylase kinase, gamma 2 (testis)	PHKG2	Expressed in all tissues
dd_Smed_v6_10200_0_1	Q5I0G3	ENSG00000138400	malate dehydrogenase 1B, NAD (soluble)	MDH1B	Group enriched	fallopian tube,testis
dd_Smed_v6_10201_0_1	Q9UN79	ENSG00000143842	SRY (sex determining region Y)-box 13	SOX13	Mixed
dd_Smed_v6_10206_0_1	O14734	ENSG00000101473	acyl-CoA thioesterase 8	ACOT8	Expressed in all tissues
dd_Smed_v6_102081_0_1	P05089	ENSG00000118520	arginase 1	ARG1	Tissue enhanced	bone marrow, liver
dd_Smed_v6_10210_0_1	Q6ZU65	ENSG00000157741	ubinuclein 2	UBN2	Expressed in all tissues
dd_Smed_v6_102111_0_1	Q03591	ENSG00000244414	complement factor H-related 1	CFHR1	Tissue enriched	liver
dd_Smed_v6_10212_0_1	Q5TZF3	ENSG00000183831	ankyrin repeat domain 45	ANKRD45	Tissue enhanced	fallopian tube, testis
dd_Smed_v6_10218_0_1	Q96QE2	ENSG00000151229	solute carrier family 2 (facilitated glucose transporter), member 13	SLC2A13	Tissue enhanced	brain
dd_Smed_v6_10219_0_1	Q02548	ENSG00000196092	paired box 5	PAX5	Tissue enhanced	lymph node, tonsil
dd_Smed_v6_10222_0_1	Q9UHK0	ENSG00000083635	nuclear fragile X mental retardation protein interacting protein 1	NUFIP1	Expressed in all tissues
dd_Smed_v6_10223_0_1	Q92685	ENSG00000214160	ALG3, alpha-1,3- mannosyltransferase	ALG3	Expressed in all tissues
dd_Smed_v6_10228_0_1	O60308	ENSG00000116198	centrosomal protein 104kDa	CEP104	Expressed in all tissues
dd_Smed_v6_1023_0_1	Q9BVK6	ENSG00000184840	transmembrane emp24 protein transport domain containing 9	TMED9	Expressed in all tissues
dd_Smed_v6_10232_0_1	O77932	ENSG00000204348	decapping exoribonuclease	DXO	Expressed in all tissues
dd_Smed_v6_10235_0_1	Q15813	ENSG00000116957	tubulin folding cofactor E	TBCE	Expressed in all tissues
dd_Smed_v6_10237_0_1	O75385	ENSG00000177169	unc-51 like autophagy activating kinase 1	ULK1	Expressed in all tissues
dd_Smed_v6_10238_0_1	Q9NZC9	ENSG00000138375	SWI/SNF related, matrix associated, actin dependent regulator of chromatin, subfamily a-like 1	SMARCAL1	Expressed in all tissues
dd_Smed_v6_10244_0_1	A6PVC2	ENSG00000138892	tubulin tyrosine ligase-like family, member 8	TTLL8	Group enriched	testis,urinary bladder
dd_Smed_v6_10246_0_1	Q86YS3	ENSG00000131242	RAB11 family interacting protein 4 (class II)	RAB11FIP4	Mixed
dd_Smed_v6_10248_0_1	Q8N9Z9	ENSG00000152936	intermediate filament tail domain containing 1	IFLTD1	Group enriched	fallopian tube,testis
dd_Smed_v6_1025_0_1	P17987	ENSG00000120438	t-complex 1	TCP1	Expressed in all tissues
dd_Smed_v6_10259_0_1	Q9P2N4	ENSG00000163638	ADAM metallopeptidase with thrombospondin type 1 motif, 9	ADAMTS9	Mixed
dd_Smed_v6_1026_0_1	Q5FVE4	ENSG00000130377	acyl-CoA synthetase bubblegum family member 2	ACSBG2	Tissue enriched	testis
dd_Smed_v6_10261_0_1	Q9BVI4	ENSG00000184967	nucleolar complex associated 4 homolog (S. cerevisiae)	NOC4L	Expressed in all tissues
dd_Smed_v6_10262_0_1	Q96MV1	ENSG00000152078	transmembrane protein 56	TMEM56	Tissue enhanced	liver
dd_Smed_v6_10263_0_1	Q8NA23	ENSG00000148225	WD repeat domain 31	WDR31	Mixed
dd_Smed_v6_10264_0_1	Q86X19	ENSG00000186889	transmembrane protein 17	TMEM17	Mixed
dd_Smed_v6_10267_0_1	P08217	ENSG00000142615	chymotrypsin-like elastase family, member 2A	CELA2A	Tissue enriched	pancreas
dd_Smed_v6_10268_0_1	Q8IWL3	ENSG00000100209	HscB mitochondrial iron-sulfur cluster co-chaperone	HSCB	Expressed in all tissues
dd_Smed_v6_10269_0_1	Q6PKX4	ENSG00000206052	docking protein 6	DOK6	Mixed
dd_Smed_v6_1027_0_1	O00534	ENSG00000110002	von Willebrand factor A domain containing 5A	VWA5A	Expressed in all tissues
dd_Smed_v6_10271_0_1	Q8NDM7	ENSG00000197748	WD repeat domain 96	WDR96	Group enriched	fallopian tube,lung,testis
dd_Smed_v6_10272_0_1	Q96MP8	ENSG00000243335	potassium channel tetramerization domain containing 7	KCTD7	Expressed in all tissues
dd_Smed_v6_10276_0_1	Q8NBJ5	ENSG00000130309	collagen beta(1-O)galactosyltransferase 1	COLGALT1	Expressed in all tissues
dd_Smed_v6_10289_0_1	Q9NXH9	ENSG00000104907	tRNA methyltransferase 1 homolog (S. cerevisiae)	TRMT1	Expressed in all tissues
dd_Smed_v6_1029_0_1	O95819	ENSG00000071054	mitogen-activated protein kinase kinase kinase kinase 4	MAP4K4	Expressed in all tissues
dd_Smed_v6_102900_0_1	P46779	ENSG00000108107	ribosomal protein L28	RPL28	Expressed in all tissues
dd_Smed_v6_10294_0_1	Q7Z2K8	ENSG00000169258	G protein regulated inducer of neurite outgrowth 1	GPRIN1	Tissue enhanced	brain
dd_Smed_v6_1030_0_1	O15212	ENSG00000204220	prefoldin subunit 6	PFDN6	Expressed in all tissues
dd_Smed_v6_10301_0_1	Q6PI98	ENSG00000153391	INO80 complex subunit C	INO80C	Expressed in all tissues
dd_Smed_v6_10302_0_1	Q99707	ENSG00000116984	5-methyltetrahydrofolate-homocysteine methyltransferase	MTR	Expressed in all tissues
dd_Smed_v6_10306_0_1	Q13439	ENSG00000144674	golgin A4	GOLGA4	Expressed in all tissues
dd_Smed_v6_1031_0_1	Q9NY33	ENSG00000254986	dipeptidyl-peptidase 3	DPP3	Expressed in all tissues
dd_Smed_v6_10310_0_1	Q9UG56	ENSG00000241878	phosphatidylserine decarboxylase	PISD	Expressed in all tissues
dd_Smed_v6_10311_0_1	Q12830	ENSG00000171634	bromodomain PHD finger transcription factor	BPTF	Expressed in all tissues
dd_Smed_v6_10316_0_1	Q15546	ENSG00000108960	monocyte to macrophage differentiation-associated	MMD	Expressed in all tissues
dd_Smed_v6_10318_0_1	O75112	ENSG00000122367	LIM domain binding 3	LDB3	Group enriched	heart muscle,skeletal muscle
dd_Smed_v6_10319_0_1	Q9P1Q0	ENSG00000143952	vacuolar protein sorting 54 homolog (S. cerevisiae)	VPS54	Expressed in all tissues
dd_Smed_v6_1032_0_1	Q96BA8	ENSG00000157613	cAMP responsive element binding protein 3-like 1	CREB3L1	Mixed
dd_Smed_v6_10324_0_1	A4D161	ENSG00000188732	family with sequence similarity 221, member A	FAM221A	Expressed in all tissues
dd_Smed_v6_10327_0_1	Q8IXY8	ENSG00000185250	peptidylprolyl isomerase (cyclophilin)-like 6	PPIL6	Tissue enhanced	fallopian tube, testis
dd_Smed_v6_10329_0_1	Q8NFH5	ENSG00000163002	nucleoporin 35kDa	NUP35	Expressed in all tissues
dd_Smed_v6_10330_0_1	Q9C0E2	ENSG00000132953	exportin 4	XPO4	Expressed in all tissues
dd_Smed_v6_10334_0_1	P22303	ENSG00000087085	acetylcholinesterase (Yt blood group)	ACHE	Tissue enriched	skeletal muscle
dd_Smed_v6_10336_0_1	Q12788	ENSG00000183751	transducin (beta)-like 3	TBL3	Expressed in all tissues
dd_Smed_v6_10338_0_1	P09874	ENSG00000143799	poly (ADP-ribose) polymerase 1	PARP1	Expressed in all tissues
dd_Smed_v6_10339_0_1	Q56UN5	ENSG00000176601	mitogen-activated protein kinase kinase kinase 19	MAP3K19	Group enriched	fallopian tube,testis
dd_Smed_v6_1034_0_1	P26196	ENSG00000110367	DEAD (Asp-Glu-Ala-Asp) box helicase 6	DDX6	Expressed in all tissues
dd_Smed_v6_10340_0_1	Q8IY37	ENSG00000150990	DEAH (Asp-Glu-Ala-His) box polypeptide 37	DHX37	Expressed in all tissues
dd_Smed_v6_10346_0_1	Q6ZV65	ENSG00000189157	family with sequence similarity 47, member E	FAM47E	Tissue enhanced	fallopian tube
dd_Smed_v6_10347_0_1	Q7Z3B4	ENSG00000138750	nucleoporin 54kDa	NUP54	Expressed in all tissues
dd_Smed_v6_10354_0_1	Q9UMX1	ENSG00000107882	suppressor of fused homolog (Drosophila)	SUFU	Expressed in all tissues
dd_Smed_v6_10355_0_1	P78417	ENSG00000148834	glutathione S-transferase omega 1	GSTO1	Expressed in all tissues
dd_Smed_v6_10357_0_1	O94923	ENSG00000138604	glucuronic acid epimerase	GLCE	Expressed in all tissues
dd_Smed_v6_10362_1_1	Q9H0E9	ENSG00000112983	bromodomain containing 8	BRD8	Expressed in all tissues
dd_Smed_v6_10364_0_1	Q6UWP2	ENSG00000108272	dehydrogenase/reductase (SDR family) member 11	DHRS11	Group enriched	colon,duodenum,rectum,small intestine
dd_Smed_v6_10369_0_1	Q7Z7A1	ENSG00000119397	centriolin	CNTRL	Mixed
dd_Smed_v6_1037_0_1	Q13637	ENSG00000118508	RAB32, member RAS oncogene family	RAB32	Expressed in all tissues
dd_Smed_v6_10372_0_1	Q8N468	ENSG00000174514	major facilitator superfamily domain containing 4	MFSD4	Tissue enhanced	kidney, stomach
dd_Smed_v6_10373_0_1	Q96C11	ENSG00000172456	FGGY carbohydrate kinase domain containing	FGGY	Expressed in all tissues
dd_Smed_v6_10377_0_1	O95163	ENSG00000070061	inhibitor of kappa light polypeptide gene enhancer in B-cells, kinase complex-associated protein	IKBKAP	Expressed in all tissues
dd_Smed_v6_103778_0_1	P19827	ENSG00000055957	inter-alpha-trypsin inhibitor heavy chain 1	ITIH1	Tissue enriched	liver
dd_Smed_v6_10378_0_1	Q9H8H2	ENSG00000125485	DEAD (Asp-Glu-Ala-Asp) box polypeptide 31	DDX31	Expressed in all tissues
dd_Smed_v6_1038_0_1	P35232	ENSG00000167085	prohibitin	PHB	Expressed in all tissues
dd_Smed_v6_10388_0_1	Q8N6M3	ENSG00000197296	fat storage-inducing transmembrane protein 2	FITM2	Tissue enhanced	heart muscle
dd_Smed_v6_103892_0_1	Q68EN5	ENSG00000196123	KIAA0895-like	KIAA0895L	Expressed in all tissues
dd_Smed_v6_10390_0_1	Q99575	ENSG00000104356	processing of precursor 1, ribonuclease P/MRP subunit (S. cerevisiae)	POP1	Mixed
dd_Smed_v6_10394_0_1	P12755	ENSG00000157933	v-ski avian sarcoma viral oncogene homolog	SKI	Expressed in all tissues
dd_Smed_v6_10397_0_1	Q6TCH7	ENSG00000163291	progestin and adipoQ receptor family member III	PAQR3	Expressed in all tissues
dd_Smed_v6_10398_0_1	Q9H3R0	ENSG00000107077	lysine (K)-specific demethylase 4C	KDM4C	Expressed in all tissues
dd_Smed_v6_10403_0_1	P23528	ENSG00000172757	cofilin 1 (non-muscle)	CFL1	Expressed in all tissues
dd_Smed_v6_10404_0_1	O75792	ENSG00000104889	ribonuclease H2, subunit A	RNASEH2A	Expressed in all tissues
dd_Smed_v6_10405_0_1	Q7Z4T9	ENSG00000183833	MYCBP-associated, testis expressed 1	MAATS1	Tissue enhanced	spleen, testis
dd_Smed_v6_10411_0_1	O60683	ENSG00000157911	peroxisomal biogenesis factor 10	PEX10	Expressed in all tissues
dd_Smed_v6_10414_0_1	Q9NRR4	ENSG00000113360	drosha, ribonuclease type III	DROSHA	Expressed in all tissues
dd_Smed_v6_10417_0_1	Q9UPP1	ENSG00000172943	PHD finger protein 8	PHF8	Expressed in all tissues
dd_Smed_v6_10426_0_1	Q17R89	ENSG00000006740	Rho GTPase activating protein 44	ARHGAP44	Mixed
dd_Smed_v6_10427_0_1	Q13285	ENSG00000136931	nuclear receptor subfamily 5, group A, member 1	NR5A1	Group enriched	adrenal gland,ovary,spleen
dd_Smed_v6_10431_0_1	Q96JN8	ENSG00000215041	neuralized E3 ubiquitin protein ligase 4	NEURL4	Expressed in all tissues
dd_Smed_v6_10436_0_1	Q9UBX3	ENSG00000183048	solute carrier family 25 (mitochondrial carrier; dicarboxylate transporter), member 10	SLC25A10	Expressed in all tissues
dd_Smed_v6_10438_0_1	Q9UI10	ENSG00000115211	eukaryotic translation initiation factor 2B, subunit 4 delta, 67kDa	EIF2B4	Expressed in all tissues
dd_Smed_v6_1044_0_1	P15121	ENSG00000085662	aldo-keto reductase family 1, member B1 (aldose reductase)	AKR1B1	Tissue enriched	adrenal gland
dd_Smed_v6_10441_0_1	Q96HH6	ENSG00000139291	transmembrane protein 19	TMEM19	Expressed in all tissues
dd_Smed_v6_10443_0_1	O15226	ENSG00000186416	NFKB repressing factor	NKRF	Expressed in all tissues
dd_Smed_v6_10444_0_1	Q8N960	ENSG00000168944	centrosomal protein 120kDa	CEP120	Expressed in all tissues
dd_Smed_v6_10450_0_1	Q6UWH6	ENSG00000144043	testis expressed 261	TEX261	Expressed in all tissues
dd_Smed_v6_104574_0_1	P49207	ENSG00000109475	ribosomal protein L34	RPL34	Expressed in all tissues
dd_Smed_v6_10458_0_1	Q9Y345	ENSG00000165970	solute carrier family 6 (neurotransmitter transporter), member 5	SLC6A5	Tissue enriched	testis
dd_Smed_v6_10460_0_1	Q8IVV2	ENSG00000167210	lipoxygenase homology domains 1	LOXHD1	Tissue enriched	testis
dd_Smed_v6_104604_0_1	Q8TF01	ENSG00000132424	PNN-interacting serine/arginine-rich protein	PNISR	Expressed in all tissues
dd_Smed_v6_10464_0_1	Q8N6S4	ENSG00000118454	ankyrin repeat domain 13C	ANKRD13C	Expressed in all tissues
dd_Smed_v6_10466_0_1	Q6ZRR5	ENSG00000181264	transmembrane protein 136	TMEM136	Mixed
dd_Smed_v6_10478_0_1	O75879	ENSG00000059691	PET112 homolog (yeast)	PET112	Expressed in all tissues
dd_Smed_v6_1048_0_1	Q8TED4	ENSG00000134955	solute carrier family 37 (glucose-6-phosphate transporter), member 2	SLC37A2	Tissue enhanced	salivary gland
dd_Smed_v6_10480_0_1	Q96Q45	ENSG00000155755	transmembrane protein 237	TMEM237	Expressed in all tissues
dd_Smed_v6_10481_0_1	O14775	ENSG00000069966	guanine nucleotide binding protein (G protein), beta 5	GNB5	Expressed in all tissues
dd_Smed_v6_10483_0_1	O14717	ENSG00000107614	tRNA aspartic acid methyltransferase 1	TRDMT1	Mixed
dd_Smed_v6_10484_0_1	Q8WY41	ENSG00000188613	nanos homolog 1 (Drosophila)	NANOS1	Tissue enhanced	skeletal muscle
dd_Smed_v6_10491_1_1	Q8IYL2	ENSG00000155275	tRNA methyltransferase 44 homolog (S. cerevisiae)	TRMT44	Expressed in all tissues
dd_Smed_v6_10498_0_1	Q9NQX3	ENSG00000171723	gephyrin	GPHN	Expressed in all tissues
dd_Smed_v6_105_0_1	Q9Y3U8	ENSG00000130255	ribosomal protein L36	RPL36	Expressed in all tissues
dd_Smed_v6_10501_0_1	Q8N6V4	ENSG00000178645	chromosome 10 open reading frame 53	C10orf53	Tissue enriched	testis
dd_Smed_v6_10508_0_1	Q7L592	ENSG00000003509	NADH dehydrogenase (ubiquinone) complex I, assembly factor 7	NDUFAF7	Expressed in all tissues
dd_Smed_v6_1051_0_1	Q9NPA8	ENSG00000120533	enhancer of yellow 2 homolog (Drosophila)	ENY2	Expressed in all tissues
dd_Smed_v6_10511_0_1	Q96CS3	ENSG00000113194	Fas associated factor family member 2	FAF2	Expressed in all tissues
dd_Smed_v6_10519_0_1	Q86U28	ENSG00000165898	iron-sulfur cluster assembly 2	ISCA2	Expressed in all tissues
dd_Smed_v6_1052_0_1	Q9ULA0	ENSG00000123992	aspartyl aminopeptidase	DNPEP	Expressed in all tissues
dd_Smed_v6_10523_0_1	Q92805	ENSG00000136935	golgin A1	GOLGA1	Expressed in all tissues
dd_Smed_v6_1053_0_1	Q6ZNF0	ENSG00000183760	Iron/zinc purple acid phosphatase-like protein	PAPL	Tissue enhanced	skin, tonsil
dd_Smed_v6_10531_0_1	O14524	ENSG00000166881	transmembrane protein 194A	TMEM194A	Mixed
dd_Smed_v6_10532_0_1	Q96JA1	ENSG00000144749	leucine-rich repeats and immunoglobulin-like domains 1	LRIG1	Expressed in all tissues
dd_Smed_v6_10533_0_1	Q8WY98	ENSG00000160055	transmembrane protein 234	TMEM234	Expressed in all tissues
dd_Smed_v6_10540_0_1	Q6ZMW3	ENSG00000214595	echinoderm microtubule associated protein like 6	EML6	Tissue enhanced	tonsil
dd_Smed_v6_10541_0_1	P0C7P0	ENSG00000230055	CDGSH iron sulfur domain 3	CISD3	Expressed in all tissues
dd_Smed_v6_10543_0_1	Q9NWH7	ENSG00000132122	spermatogenesis associated 6	SPATA6	Tissue enriched	testis
dd_Smed_v6_10544_0_1	Q86VS3	ENSG00000103599	IQ motif containing H	IQCH	Tissue enhanced	fallopian tube, testis
dd_Smed_v6_10546_0_1	O60906	ENSG00000135587	sphingomyelin phosphodiesterase 2, neutral membrane (neutral sphingomyelinase)	SMPD2	Mixed
dd_Smed_v6_10557_0_1	Q6P587	ENSG00000180185	fumarylacetoacetate hydrolase domain containing 1	FAHD1	Expressed in all tissues
dd_Smed_v6_10558_1_1	O14929	ENSG00000128708	histone acetyltransferase 1	HAT1	Expressed in all tissues
dd_Smed_v6_1056_0_1	P62306	ENSG00000139343	small nuclear ribonucleoprotein polypeptide F	SNRPF	Expressed in all tissues
dd_Smed_v6_10561_0_1	Q9BSC4	ENSG00000115761	nucleolar protein 10	NOL10	Expressed in all tissues
dd_Smed_v6_10562_0_1	Q8TDR0	ENSG00000204104	TNF receptor-associated factor 3 interacting protein 1	TRAF3IP1	Expressed in all tissues
dd_Smed_v6_10564_0_1	Q8N6T7	ENSG00000077463	sirtuin 6	SIRT6	Expressed in all tissues
dd_Smed_v6_10566_0_1	Q9H0A0	ENSG00000135372	N-acetyltransferase 10 (GCN5-related)	NAT10	Expressed in all tissues
dd_Smed_v6_10574_0_1	O95164	ENSG00000122042	ubiquitin-like 3	UBL3	Expressed in all tissues
dd_Smed_v6_10575_0_1	Q9UHY8	ENSG00000171055	fasciculation and elongation protein zeta 2 (zygin II)	FEZ2	Expressed in all tissues
dd_Smed_v6_10577_0_1	Q5TA45	ENSG00000127054	cleavage and polyadenylation specific factor 3-like	CPSF3L	Expressed in all tissues
dd_Smed_v6_1058_0_1	Q15084	ENSG00000143870	protein disulfide isomerase family A, member 6	PDIA6	Expressed in all tissues
dd_Smed_v6_10581_0_1	Q96AB6	ENSG00000157045	N-terminal asparagine amidase	NTAN1	Expressed in all tissues
dd_Smed_v6_1059_0_1	Q9UHA3	ENSG00000137876	ribosomal L24 domain containing 1	RSL24D1	Expressed in all tissues
dd_Smed_v6_10591_0_1	Q9Y4K0	ENSG00000134013	lysyl oxidase-like 2	LOXL2	Mixed
dd_Smed_v6_10593_0_1	O60658	ENSG00000073417	phosphodiesterase 8A	PDE8A	Expressed in all tissues
dd_Smed_v6_10598_0_1	Q9H6Q4	ENSG00000103245	nuclear prelamin A recognition factor-like	NARFL	Expressed in all tissues
dd_Smed_v6_106_0_1	P42677	ENSG00000177954	ribosomal protein S27	RPS27	Expressed in all tissues
dd_Smed_v6_1060_0_1	P54886	ENSG00000059573	aldehyde dehydrogenase 18 family, member A1	ALDH18A1	Expressed in all tissues
dd_Smed_v6_10610_0_1	Q9BTW9	ENSG00000141556	tubulin folding cofactor D	TBCD	Expressed in all tissues
dd_Smed_v6_10611_0_1	Q8N9W6	ENSG00000152430	boule-like RNA-binding protein	BOLL	Tissue enriched	testis
dd_Smed_v6_10612_0_1	Q8IVS2	ENSG00000100294	malonyl CoA:ACP acyltransferase (mitochondrial)	MCAT	Expressed in all tissues
dd_Smed_v6_10614_0_1	Q969Q6	ENSG00000092020	protein phosphatase 2, regulatory subunit B'', gamma	PPP2R3C	Expressed in all tissues
dd_Smed_v6_10615_0_1	Q8N9B4	ENSG00000137494	ankyrin repeat domain 42	ANKRD42	Tissue enhanced	testis
dd_Smed_v6_10622_0_1	Q96E29	ENSG00000156469	MTERF domain containing 1	MTERFD1	Expressed in all tissues
dd_Smed_v6_10628_0_1	Q7Z589	ENSG00000158636	chromosome 11 open reading frame 30	C11orf30	Expressed in all tissues
dd_Smed_v6_1063_0_1	P56545	ENSG00000175029	C-terminal binding protein 2	CTBP2	Expressed in all tissues
dd_Smed_v6_10632_0_1	Q86US8	ENSG00000070366	SMG6 nonsense mediated mRNA decay factor	SMG6	Expressed in all tissues
dd_Smed_v6_10635_0_1	Q8TC05	ENSG00000111554	Mdm1 nuclear protein homolog (mouse)	MDM1	Expressed in all tissues
dd_Smed_v6_10636_0_1	Q15126	ENSG00000163344	phosphomevalonate kinase	PMVK	Expressed in all tissues
dd_Smed_v6_10637_0_1	Q6GQQ9	ENSG00000163113	OTU domain containing 7B	OTUD7B	Mixed
dd_Smed_v6_10638_0_1	Q9UG01	ENSG00000138002	intraflagellar transport 172 homolog (Chlamydomonas)	IFT172	Expressed in all tissues
dd_Smed_v6_10640_0_1	Q6ZSS7	ENSG00000151690	major facilitator superfamily domain containing 6	MFSD6	Expressed in all tissues
dd_Smed_v6_10644_0_1	Q6P4H8	ENSG00000150756	family with sequence similarity 173, member B	FAM173B	Expressed in all tissues
dd_Smed_v6_10647_0_1	Q9UJT9	ENSG00000183580	F-box and leucine-rich repeat protein 7	FBXL7	Mixed
dd_Smed_v6_1065_0_1	Q14677	ENSG00000113282	clathrin interactor 1	CLINT1	Expressed in all tissues
dd_Smed_v6_10657_0_1	Q9BU89	ENSG00000129932	deoxyhypusine hydroxylase/monooxygenase	DOHH	Mixed
dd_Smed_v6_10666_0_1	Q9NS86	ENSG00000132434	LanC lantibiotic synthetase component C-like 2 (bacterial)	LANCL2	Expressed in all tissues
dd_Smed_v6_10667_0_1	Q06203	ENSG00000128059	phosphoribosyl pyrophosphate amidotransferase	PPAT	Expressed in all tissues
dd_Smed_v6_10669_0_1	Q9NNW5	ENSG00000178252	WD repeat domain 6	WDR6	Expressed in all tissues
dd_Smed_v6_1067_0_1	O75787	ENSG00000182220	ATPase, H+ transporting, lysosomal accessory protein 2	ATP6AP2	Expressed in all tissues
dd_Smed_v6_10670_0_1	Q9Y2G3	ENSG00000058063	ATPase, class VI, type 11B	ATP11B	Expressed in all tissues
dd_Smed_v6_10672_0_1	Q15814	ENSG00000124659	tubulin folding cofactor C	TBCC	Expressed in all tissues
dd_Smed_v6_10675_0_1	Q96I15	ENSG00000132330	selenocysteine lyase	SCLY	Expressed in all tissues
dd_Smed_v6_10676_0_1	Q8TAF7	ENSG00000197808	zinc finger protein 461	ZNF461	Expressed in all tissues
dd_Smed_v6_10677_0_1	Q8N7X0	ENSG00000118492	androglobin	ADGB	Group enriched	fallopian tube,testis
dd_Smed_v6_10689_0_1	O60500	ENSG00000161270	nephrosis 1, congenital, Finnish type (nephrin)	NPHS1	Tissue enhanced	kidney, pancreas
dd_Smed_v6_1069_0_1	P10515	ENSG00000150768	dihydrolipoamide S-acetyltransferase	DLAT	Expressed in all tissues
dd_Smed_v6_10691_0_1	Q9UJM8	ENSG00000101323	hydroxyacid oxidase (glycolate oxidase) 1	HAO1	Tissue enriched	liver
dd_Smed_v6_10700_0_1	Q9BRR8	ENSG00000076650	G patch domain containing 1	GPATCH1	Expressed in all tissues
dd_Smed_v6_10704_0_1	Q15831	ENSG00000118046	serine/threonine kinase 11	STK11	Expressed in all tissues
dd_Smed_v6_10709_0_1	Q9NWH2	ENSG00000215712	transmembrane protein 242	TMEM242	Expressed in all tissues
dd_Smed_v6_10711_0_1	Q96LD8	ENSG00000166192	SUMO/sentrin specific peptidase family member 8	SENP8	Mixed
dd_Smed_v6_10718_0_1	P55317	ENSG00000129514	forkhead box A1	FOXA1	Tissue enhanced	prostate
dd_Smed_v6_10724_0_1	Q8NHS3	ENSG00000164073	major facilitator superfamily domain containing 8	MFSD8	Expressed in all tissues
dd_Smed_v6_10725_0_1	P51946	ENSG00000134480	cyclin H	CCNH	Expressed in all tissues
dd_Smed_v6_1073_0_1	P17735	ENSG00000198650	tyrosine aminotransferase	TAT	Tissue enriched	liver
dd_Smed_v6_10730_0_1	Q6ZN44	ENSG00000113763	unc-5 homolog A (C. elegans)	UNC5A	Group enriched	adrenal gland,brain
dd_Smed_v6_10731_0_1	Q16566	ENSG00000152495	calcium/calmodulin-dependent protein kinase IV	CAMK4	Tissue enhanced	testis
dd_Smed_v6_10733_0_1	Q96I76	ENSG00000198746	G patch domain containing 3	GPATCH3	Expressed in all tissues
dd_Smed_v6_10742_0_1	Q9BYW2	ENSG00000181555	SET domain containing 2	SETD2	Expressed in all tissues
dd_Smed_v6_10744_0_1	Q8IYS1	ENSG00000146281	peptidase M20 domain containing 2	PM20D2	Expressed in all tissues
dd_Smed_v6_10745_0_1	Q8IVJ1	ENSG00000133065	solute carrier family 41 (magnesium transporter), member 1	SLC41A1	Expressed in all tissues
dd_Smed_v6_1075_0_1	P61088	ENSG00000177889	ubiquitin-conjugating enzyme E2N	UBE2N	Expressed in all tissues
dd_Smed_v6_10751_0_1	O94972	ENSG00000108395	tripartite motif containing 37	TRIM37	Expressed in all tissues
dd_Smed_v6_10752_0_1	Q8IXH7	ENSG00000101158	negative elongation factor complex member C/D	NELFCD	Expressed in all tissues
dd_Smed_v6_10757_0_1	Q569K6	ENSG00000187860	coiled-coil domain containing 157	CCDC157	Group enriched	fallopian tube,testis
dd_Smed_v6_10761_0_1	Q9BSG0	ENSG00000135617	protease-associated domain containing 1	PRADC1	Expressed in all tissues
dd_Smed_v6_10764_0_1	Q9Y2G4	ENSG00000135299	ankyrin repeat domain 6	ANKRD6	Expressed in all tissues
dd_Smed_v6_1077_0_1	Q9NRX1	ENSG00000115946	partner of NOB1 homolog (S. cerevisiae)	PNO1	Expressed in all tissues
dd_Smed_v6_10771_0_1	P57060	ENSG00000156253	RWD domain containing 2B	RWDD2B	Expressed in all tissues
dd_Smed_v6_10776_0_1	Q3ZCV2	ENSG00000162398	chromosome 1 open reading frame 177	C1orf177	Group enriched	esophagus,testis
dd_Smed_v6_10778_0_1	Q96HU8	ENSG00000165023	DIRAS family, GTP-binding RAS-like 2	DIRAS2	Tissue enriched	brain
dd_Smed_v6_10780_0_1	Q8N0W5	ENSG00000174628	IQ motif containing K	IQCK	Expressed in all tissues
dd_Smed_v6_10781_0_1	A6H8Y1	ENSG00000145734	B double prime 1, subunit of RNA polymerase III transcription initiation factor IIIB	BDP1	Expressed in all tissues
dd_Smed_v6_10782_0_1	Q96HP4	ENSG00000154814	oxidoreductase NAD-binding domain containing 1	OXNAD1	Expressed in all tissues
dd_Smed_v6_10784_0_1	O60573	ENSG00000135930	eukaryotic translation initiation factor 4E family member 2	EIF4E2	Expressed in all tissues
dd_Smed_v6_10787_0_1	Q9UH99	ENSG00000100242	Sad1 and UNC84 domain containing 2	SUN2	Expressed in all tissues
dd_Smed_v6_1079_0_1	Q86T03	ENSG00000165782	transmembrane protein 55B	TMEM55B	Expressed in all tissues
dd_Smed_v6_10791_0_1	Q96CU9	ENSG00000110074	FAD-dependent oxidoreductase domain containing 1	FOXRED1	Expressed in all tissues
dd_Smed_v6_10796_0_1	Q8IVS8	ENSG00000168237	glycerate kinase	GLYCTK	Expressed in all tissues
dd_Smed_v6_10797_0_1	Q8WVE0	ENSG00000150456	N-6 adenine-specific DNA methyltransferase 2 (putative)	N6AMT2	Expressed in all tissues
dd_Smed_v6_10798_0_1	Q6NZY4	ENSG00000033030	zinc finger, CCHC domain containing 8	ZCCHC8	Expressed in all tissues
dd_Smed_v6_108_0_1	P62917	ENSG00000161016	ribosomal protein L8	RPL8	Expressed in all tissues
dd_Smed_v6_10802_0_1	Q14690	ENSG00000148843	programmed cell death 11	PDCD11	Expressed in all tissues
dd_Smed_v6_10804_0_1	Q9P260	ENSG00000134444	KIAA1468	KIAA1468	Expressed in all tissues
dd_Smed_v6_10806_0_1	Q8NBT0	ENSG00000164087	POC1 centriolar protein A	POC1A	Mixed
dd_Smed_v6_10808_0_1	P28715	ENSG00000134899	excision repair cross-complementing rodent repair deficiency, complementation group 5	ERCC5	Expressed in all tissues
dd_Smed_v6_1081_0_1	Q9UIV1	ENSG00000198791	CCR4-NOT transcription complex, subunit 7	CNOT7	Expressed in all tissues
dd_Smed_v6_10812_0_1	Q9H0F7	ENSG00000113966	ADP-ribosylation factor-like 6	ARL6	Mixed
dd_Smed_v6_10822_0_1	Q96NT5	ENSG00000076351	solute carrier family 46 (folate transporter), member 1	SLC46A1	Expressed in all tissues
dd_Smed_v6_10824_0_1	Q96DT6	ENSG00000125703	autophagy related 4C, cysteine peptidase	ATG4C	Expressed in all tissues
dd_Smed_v6_10826_0_1	O75751	ENSG00000146477	solute carrier family 22 (organic cation transporter), member 3	SLC22A3	Tissue enhanced	liver
dd_Smed_v6_10832_0_1	P09958	ENSG00000140564	furin (paired basic amino acid cleaving enzyme)	FURIN	Expressed in all tissues
dd_Smed_v6_10833_0_1	Q9Y238	ENSG00000008226	deleted in lung and esophageal cancer 1	DLEC1	Group enriched	fallopian tube,lung,testis
dd_Smed_v6_10834_0_1	Q8IYG6	ENSG00000161328	leucine rich repeat containing 56	LRRC56	Tissue enhanced	testis
dd_Smed_v6_10841_0_1	Q6UWE0	ENSG00000148356	leucine rich repeat and sterile alpha motif containing 1	LRSAM1	Expressed in all tissues
dd_Smed_v6_10848_0_1	Q9P286	ENSG00000101349	p21 protein (Cdc42/Rac)-activated kinase 7	PAK7	Tissue enhanced	brain
dd_Smed_v6_10849_0_1	O60701	ENSG00000109814	UDP-glucose 6-dehydrogenase	UGDH	Expressed in all tissues
dd_Smed_v6_1085_0_1	Q8TBQ9	ENSG00000174695	transmembrane protein 167A	TMEM167A	Expressed in all tissues
dd_Smed_v6_10850_0_1	Q9Y4E6	ENSG00000091157	WD repeat domain 7	WDR7	Expressed in all tissues
dd_Smed_v6_10851_0_1	Q8IWA0	ENSG00000115368	WD repeat domain 75	WDR75	Expressed in all tissues
dd_Smed_v6_10869_0_1	O95864	ENSG00000134824	fatty acid desaturase 2	FADS2	Expressed in all tissues
dd_Smed_v6_1087_0_1	Q92598	ENSG00000120694	heat shock 105kDa/110kDa protein 1	HSPH1	Expressed in all tissues
dd_Smed_v6_10876_0_1	O43257	ENSG00000106400	zinc finger, HIT-type containing 1	ZNHIT1	Expressed in all tissues
dd_Smed_v6_10882_0_1	O94888	ENSG00000163960	UBX domain protein 7	UBXN7	Expressed in all tissues
dd_Smed_v6_10885_0_1	Q8N3J2	ENSG00000101574	methyltransferase like 4	METTL4	Expressed in all tissues
dd_Smed_v6_1089_0_1	Q99623	ENSG00000215021	prohibitin 2	PHB2	Expressed in all tissues
dd_Smed_v6_10893_0_1	Q5T0N1	ENSG00000156042	tetratricopeptide repeat domain 18	TTC18	Tissue enhanced	fallopian tube, testis
dd_Smed_v6_10902_0_1	Q14728	ENSG00000109736	major facilitator superfamily domain containing 10	MFSD10	Expressed in all tissues
dd_Smed_v6_10905_0_1	Q9NWU2	ENSG00000101193	GID complex subunit 8	GID8	Expressed in all tissues
dd_Smed_v6_10924_0_1	Q01085	ENSG00000151923	TIA1 cytotoxic granule-associated RNA binding protein-like 1	TIAL1	Expressed in all tissues
dd_Smed_v6_10926_0_1	Q7Z3E5	ENSG00000135931	armadillo repeat containing 9	ARMC9	Mixed
dd_Smed_v6_1094_0_1	Q9Y5Y2	ENSG00000095906	nucleotide binding protein 2	NUBP2	Expressed in all tissues
dd_Smed_v6_10945_0_1	O60303	ENSG00000047578	KIAA0556	KIAA0556	Tissue enhanced	fallopian tube
dd_Smed_v6_10946_0_1	Q63HQ2	ENSG00000164318	EGF-like, fibronectin type III and laminin G domains	EGFLAM	Mixed
dd_Smed_v6_10949_0_1	Q9NVF9	ENSG00000143845	ethanolamine kinase 2	ETNK2	Tissue enhanced	kidney, liver, testis
dd_Smed_v6_10952_0_1	Q16595	ENSG00000165060	frataxin	FXN	Expressed in all tissues
dd_Smed_v6_10955_0_1	Q9NTG7	ENSG00000142082	sirtuin 3	SIRT3	Expressed in all tissues
dd_Smed_v6_1096_0_1	P15531	ENSG00000239672	NME/NM23 nucleoside diphosphate kinase 1	NME1	Expressed in all tissues
dd_Smed_v6_10966_0_1	Q92630	ENSG00000127334	dual-specificity tyrosine-(Y)-phosphorylation regulated kinase 2	DYRK2	Expressed in all tissues
dd_Smed_v6_10970_0_1	P17152	ENSG00000178307	transmembrane protein 11	TMEM11	Expressed in all tissues
dd_Smed_v6_10972_0_1	A6NCI4	ENSG00000175267	von Willebrand factor A domain containing 3A	VWA3A	Tissue enhanced	fallopian tube, lung
dd_Smed_v6_10976_0_1	Q330K2	ENSG00000156170	NADH dehydrogenase (ubiquinone) complex I, assembly factor 6	NDUFAF6	Expressed in all tissues
dd_Smed_v6_1098_0_1	Q14764	ENSG00000013364	major vault protein	MVP	Expressed in all tissues
dd_Smed_v6_10983_0_1	Q9UQ05	ENSG00000089558	potassium voltage-gated channel, subfamily H (eag-related), member 4	KCNH4	Not detected
dd_Smed_v6_10985_0_1	Q8TCG2	ENSG00000038210	phosphatidylinositol 4-kinase type 2 beta	PI4K2B	Expressed in all tissues
dd_Smed_v6_10987_0_1	Q8NEZ3	ENSG00000157796	WD repeat domain 19	WDR19	Expressed in all tissues
dd_Smed_v6_10989_0_1	Q96C34	ENSG00000198863	RUN domain containing 1	RUNDC1	Expressed in all tissues
dd_Smed_v6_1099_0_1	P17707	ENSG00000123505	adenosylmethionine decarboxylase 1	AMD1	Expressed in all tissues
dd_Smed_v6_10990_0_1	Q2M385	ENSG00000197629	macrophage expressed 1	MPEG1	Expressed in all tissues
dd_Smed_v6_10999_0_1	Q969W0	ENSG00000165389	serine palmitoyltransferase, small subunit A	SPTSSA	Expressed in all tissues
dd_Smed_v6_1100_0_1	O15121	ENSG00000143753	delta(4)-desaturase, sphingolipid 1	DEGS1	Expressed in all tissues
dd_Smed_v6_11006_0_1	O75717	ENSG00000198554	WD repeat and HMG-box DNA binding protein 1	WDHD1	Mixed
dd_Smed_v6_11012_0_1	Q6ZMV9	ENSG00000164627	kinesin family member 6	KIF6	Tissue enhanced	fallopian tube, testis
dd_Smed_v6_11013_0_1	P50747	ENSG00000159267	holocarboxylase synthetase (biotin-(proprionyl-CoA-carboxylase (ATP-hydrolysing)) ligase)	HLCS	Expressed in all tissues
dd_Smed_v6_11014_0_1	Q9H336	ENSG00000121005	cysteine-rich secretory protein LCCL domain containing 1	CRISPLD1	Tissue enhanced	prostate
dd_Smed_v6_11019_0_1	Q5JSJ4	ENSG00000165359	DEAD/H (Asp-Glu-Ala-Asp/His) box polypeptide 26B	DDX26B	Expressed in all tissues
dd_Smed_v6_1102_0_1	P46379	ENSG00000204463	BCL2-associated athanogene 6	BAG6	Expressed in all tissues
dd_Smed_v6_11023_0_1	O94921	ENSG00000058091	cyclin-dependent kinase 14	CDK14	Expressed in all tissues
dd_Smed_v6_11024_0_1	P22455	ENSG00000160867	fibroblast growth factor receptor 4	FGFR4	Mixed
dd_Smed_v6_11025_0_1	Q9Y6I8	ENSG00000101417	peroxisomal membrane protein 4, 24kDa	PXMP4	Expressed in all tissues
dd_Smed_v6_11026_0_1	Q9BW83	ENSG00000100360	intraflagellar transport 27 homolog (Chlamydomonas)	IFT27	Expressed in all tissues
dd_Smed_v6_11027_0_1	Q96I13	ENSG00000127220	abhydrolase domain containing 8	ABHD8	Mixed
dd_Smed_v6_11039_0_1	P54750	ENSG00000115252	phosphodiesterase 1A, calmodulin-dependent	PDE1A	Tissue enhanced	thyroid gland
dd_Smed_v6_11041_0_1	Q14137	ENSG00000170727	block of proliferation 1	BOP1	Expressed in all tissues
dd_Smed_v6_11042_1_1	Q6ZV70	ENSG00000147036	LanC lantibiotic synthetase component C-like 3 (bacterial)	LANCL3	Mixed
dd_Smed_v6_11046_0_1	O95453	ENSG00000140694	poly(A)-specific ribonuclease	PARN	Expressed in all tissues
dd_Smed_v6_11048_0_1	A8MT70	ENSG00000169064	zinc finger, B-box domain containing	ZBBX	Group enriched	fallopian tube,testis
dd_Smed_v6_11054_0_1	Q14442	ENSG00000100564	phosphatidylinositol glycan anchor biosynthesis, class H	PIGH	Expressed in all tissues
dd_Smed_v6_1106_0_1	P43004	ENSG00000110436	solute carrier family 1 (glial high affinity glutamate transporter), member 2	SLC1A2	Tissue enriched	brain
dd_Smed_v6_11063_0_1	A6NDG6	ENSG00000184207	phosphoglycolate phosphatase	PGP	Expressed in all tissues
dd_Smed_v6_11066_0_1	Q8IW35	ENSG00000182504	centrosomal protein 97kDa	CEP97	Mixed
dd_Smed_v6_11067_0_1	Q9NRP7	ENSG00000163482	serine/threonine kinase 36	STK36	Expressed in all tissues
dd_Smed_v6_11073_0_1	Q9P0U3	ENSG00000079387	SUMO1/sentrin specific peptidase 1	SENP1	Expressed in all tissues
dd_Smed_v6_11085_0_1	Q149M9	ENSG00000188039	NACHT and WD repeat domain containing 1	NWD1	Group enriched	fallopian tube,prostate
dd_Smed_v6_11087_0_1	Q9BQI3	ENSG00000086232	eukaryotic translation initiation factor 2-alpha kinase 1	EIF2AK1	Expressed in all tissues
dd_Smed_v6_11089_0_1	Q05D32	ENSG00000137770	CTD (carboxy-terminal domain, RNA polymerase II, polypeptide A) small phosphatase like 2	CTDSPL2	Expressed in all tissues
dd_Smed_v6_11092_0_1	Q13255	ENSG00000152822	glutamate receptor, metabotropic 1	GRM1	Group enriched	brain,heart muscle
dd_Smed_v6_11097_0_1	Q5W0A0	ENSG00000165837	family with sequence similarity 194, member B	FAM194B	Tissue enhanced	testis
dd_Smed_v6_11098_0_1	Q15649	ENSG00000108278	zinc finger, HIT-type containing 3	ZNHIT3	Expressed in all tissues
dd_Smed_v6_11099_0_1	Q9Y535	ENSG00000100413	polymerase (RNA) III (DNA directed) polypeptide H (22.9kD)	POLR3H	Expressed in all tissues
dd_Smed_v6_111_0_1	P62888	ENSG00000156482	ribosomal protein L30	RPL30	Expressed in all tissues
dd_Smed_v6_11103_1_1	O75191	ENSG00000093217	xylulokinase homolog (H. influenzae)	XYLB	Tissue enhanced	liver
dd_Smed_v6_11122_0_1	Q9BRN9	ENSG00000184277	TM2 domain containing 3	TM2D3	Expressed in all tissues
dd_Smed_v6_11127_0_1	Q8TBY9	ENSG00000158023	WD repeat domain 66	WDR66	Tissue enhanced	fallopian tube, testis
dd_Smed_v6_1113_0_1	P61019	ENSG00000104388	RAB2A, member RAS oncogene family	RAB2A	Expressed in all tissues
dd_Smed_v6_11130_0_1	Q96QT6	ENSG00000109118	PHD finger protein 12	PHF12	Expressed in all tissues
dd_Smed_v6_11133_0_1	Q8N1G1	ENSG00000079313	REX1, RNA exonuclease 1 homolog (S. cerevisiae)	REXO1	Expressed in all tissues
dd_Smed_v6_1114_0_1	P32754	ENSG00000158104	4-hydroxyphenylpyruvate dioxygenase	HPD	Group enriched	kidney,liver
dd_Smed_v6_11140_0_1	Q8N3C0	ENSG00000112249	activating signal cointegrator 1 complex subunit 3	ASCC3	Expressed in all tissues
dd_Smed_v6_11141_0_1	O75808	ENSG00000103326	calpain 15	CAPN15	Expressed in all tissues
dd_Smed_v6_11145_0_1	O94762	ENSG00000108469	RecQ protein-like 5	RECQL5	Expressed in all tissues
dd_Smed_v6_11149_0_1	P21675	ENSG00000147133	TAF1 RNA polymerase II, TATA box binding protein (TBP)-associated factor, 250kDa	TAF1	Expressed in all tissues
dd_Smed_v6_1115_0_1	Q9Y5J9	ENSG00000150779	translocase of inner mitochondrial membrane 8 homolog B (yeast)	TIMM8B	Expressed in all tissues
dd_Smed_v6_11156_0_1	Q8N8Q1	ENSG00000174151	cytochrome b561 family, member D1	CYB561D1	Mixed
dd_Smed_v6_11158_0_1	O95922	ENSG00000100271	tubulin tyrosine ligase-like family, member 1	TTLL1	Mixed
dd_Smed_v6_11160_0_1	Q68DX3	ENSG00000170324	FERM and PDZ domain containing 2	FRMPD2	Group enriched	brain,fallopian tube,lung,testis
dd_Smed_v6_11164_0_1	O43159	ENSG00000132275	ribosomal RNA processing 8, methyltransferase, homolog (yeast)	RRP8	Expressed in all tissues
dd_Smed_v6_11169_0_1	Q9Y2G8	ENSG00000116138	DnaJ (Hsp40) homolog, subfamily C, member 16	DNAJC16	Expressed in all tissues
dd_Smed_v6_11172_0_1	P30793	ENSG00000131979	GTP cyclohydrolase 1	GCH1	Tissue enhanced	liver
dd_Smed_v6_11175_0_1	O14893	ENSG00000092208	gem (nuclear organelle) associated protein 2	GEMIN2	Expressed in all tissues
dd_Smed_v6_11176_0_1	Q9H7X7	ENSG00000128581	RAB, member RAS oncogene family-like 5	RABL5	Expressed in all tissues
dd_Smed_v6_11179_0_1	Q9Y5B6	ENSG00000159086	PAX3 and PAX7 binding protein 1	PAXBP1	Expressed in all tissues
dd_Smed_v6_1118_0_1	Q15046	ENSG00000065427	lysyl-tRNA synthetase	KARS	Expressed in all tissues
dd_Smed_v6_11184_0_1	Q8IY17	ENSG00000032444	patatin-like phospholipase domain containing 6	PNPLA6	Expressed in all tissues
dd_Smed_v6_11185_0_1	P78330	ENSG00000146733	phosphoserine phosphatase	PSPH	Expressed in all tissues
dd_Smed_v6_11186_0_1	P57081	ENSG00000160193	WD repeat domain 4	WDR4	Expressed in all tissues
dd_Smed_v6_11189_0_1	Q9P2K1	ENSG00000048342	coiled-coil and C2 domain containing 2A	CC2D2A	Mixed
dd_Smed_v6_11197_0_1	Q5VZY2	ENSG00000203805	phosphatidic acid phosphatase type 2 domain containing 1A	PPAPDC1A	Group enriched	bone marrow,brain,gallbladder,kidney,testis
dd_Smed_v6_11199_0_1	Q8IYR0	ENSG00000213204	chromosome 6 open reading frame 165	C6orf165	Tissue enriched	testis
dd_Smed_v6_11200_0_1	Q9UHR6	ENSG00000174276	zinc finger, HIT-type containing 2	ZNHIT2	Tissue enhanced	testis
dd_Smed_v6_11210_0_1	Q8NA29	ENSG00000168389	major facilitator superfamily domain containing 2A	MFSD2A	Tissue enhanced	placenta
dd_Smed_v6_11212_1_1	Q9Y5B0	ENSG00000060069	CTD (carboxy-terminal domain, RNA polymerase II, polypeptide A) phosphatase, subunit 1	CTDP1	Expressed in all tissues
dd_Smed_v6_11214_0_1	Q9Y234	ENSG00000144182	lipoyltransferase 1	LIPT1	Expressed in all tissues
dd_Smed_v6_11228_0_1	P50607	ENSG00000166402	tubby bipartite transcription factor	TUB	Mixed
dd_Smed_v6_1123_0_1	Q9UHL4	ENSG00000176978	dipeptidyl-peptidase 7	DPP7	Expressed in all tissues
dd_Smed_v6_11234_0_1	Q9Y2Z4	ENSG00000139131	tyrosyl-tRNA synthetase 2, mitochondrial	YARS2	Expressed in all tissues
dd_Smed_v6_11237_0_1	Q9ULK5	ENSG00000162738	VANGL planar cell polarity protein 2	VANGL2	Tissue enhanced	skin
dd_Smed_v6_11241_0_1	Q9H993	ENSG00000146476	chromosome 6 open reading frame 211	C6orf211	Expressed in all tissues
dd_Smed_v6_1125_0_1	Q9BX40	ENSG00000149657	LSM14B, SCD6 homolog B (S. cerevisiae)	LSM14B	Expressed in all tissues
dd_Smed_v6_11252_0_1	Q14678	ENSG00000107104	KN motif and ankyrin repeat domains 1	KANK1	Expressed in all tissues
dd_Smed_v6_11254_0_1	Q96RD6	ENSG00000073150	pannexin 2	PANX2	Tissue enhanced	brain
dd_Smed_v6_1126_0_1	Q8TF09	ENSG00000168589	dynein, light chain, roadblock-type 2	DYNLRB2	Group enriched	fallopian tube,testis
dd_Smed_v6_11261_0_1	Q8WTX9	ENSG00000159714	zinc finger, DHHC-type containing 1	ZDHHC1	Mixed
dd_Smed_v6_11263_0_1	O43929	ENSG00000115947	origin recognition complex, subunit 4	ORC4	Expressed in all tissues
dd_Smed_v6_1127_0_1	Q14749	ENSG00000124713	glycine N-methyltransferase	GNMT	Group enriched	liver,pancreas
dd_Smed_v6_11273_0_1	P0C870	ENSG00000243789	jumonji domain containing 7	JMJD7	Expressed in all tissues
dd_Smed_v6_11274_0_1	Q9UJT0	ENSG00000074935	tubulin, epsilon 1	TUBE1	Expressed in all tissues
dd_Smed_v6_11277_0_1	Q6V702	ENSG00000197826	chromosome 4 open reading frame 22	C4orf22	Group enriched	fallopian tube,testis
dd_Smed_v6_11279_0_1	Q96SZ6	ENSG00000101391	CDK5 regulatory subunit associated protein 1	CDK5RAP1	Expressed in all tissues
dd_Smed_v6_11287_0_1	P22676	ENSG00000172137	calbindin 2	CALB2	Tissue enhanced	adipose tissue, testis
dd_Smed_v6_11289_0_1	Q9ULV0	ENSG00000167306	myosin VB	MYO5B	Mixed
dd_Smed_v6_11291_0_1	Q6TDU7	ENSG00000118307	cancer susceptibility candidate 1	CASC1	Group enriched	fallopian tube,testis
dd_Smed_v6_11293_0_1	Q9P2W9	ENSG00000168818	syntaxin 18	STX18	Expressed in all tissues
dd_Smed_v6_11296_0_1	Q8TEW0	ENSG00000148498	par-3 family cell polarity regulator	PARD3	Mixed
dd_Smed_v6_113_0_1	P62899	ENSG00000071082	ribosomal protein L31	RPL31	Expressed in all tissues
dd_Smed_v6_1130_0_1	Q13530	ENSG00000132824	serine incorporator 3	SERINC3	Expressed in all tissues
dd_Smed_v6_11300_0_1	Q96RY7	ENSG00000187535	intraflagellar transport 140 homolog (Chlamydomonas)	IFT140	Expressed in all tissues
dd_Smed_v6_11304_0_1	Q9BX46	ENSG00000112183	RNA binding motif protein 24	RBM24	Tissue enhanced	heart muscle, skeletal muscle
dd_Smed_v6_11306_0_1	Q9UGJ1	ENSG00000137822	tubulin, gamma complex associated protein 4	TUBGCP4	Expressed in all tissues
dd_Smed_v6_11308_0_1	Q9H5U6	ENSG00000168228	zinc finger, CCHC domain containing 4	ZCCHC4	Expressed in all tissues
dd_Smed_v6_11310_0_1	P00533	ENSG00000146648	epidermal growth factor receptor	EGFR	Tissue enhanced	placenta
dd_Smed_v6_11313_0_1	Q86Y38	ENSG00000103489	xylosyltransferase I	XYLT1	Mixed
dd_Smed_v6_11320_0_1	P20711	ENSG00000132437	dopa decarboxylase (aromatic L-amino acid decarboxylase)	DDC	Tissue enhanced	duodenum, kidney, small intestine
dd_Smed_v6_11322_0_1	Q96NY9	ENSG00000172732	MUS81 structure-specific endonuclease subunit	MUS81	Expressed in all tissues
dd_Smed_v6_11323_0_1	Q9GZU8	ENSG00000172775	family with sequence similarity 192, member A	FAM192A	Expressed in all tissues
dd_Smed_v6_11324_0_1	Q9NWL6	ENSG00000138381	asparagine synthetase domain containing 1	ASNSD1	Expressed in all tissues
dd_Smed_v6_11329_0_1	Q15051	ENSG00000173226	IQ motif containing B1	IQCB1	Expressed in all tissues
dd_Smed_v6_1133_0_1	O94817	ENSG00000145782	autophagy related 12	ATG12	Expressed in all tissues
dd_Smed_v6_11330_0_1	Q12908	ENSG00000125255	solute carrier family 10 (sodium/bile acid cotransporter), member 2	SLC10A2	Group enriched	duodenum,kidney,small intestine
dd_Smed_v6_11337_0_1	O00409	ENSG00000053254	forkhead box N3	FOXN3	Expressed in all tissues
dd_Smed_v6_1134_0_1	Q13823	ENSG00000134697	guanine nucleotide binding protein-like 2 (nucleolar)	GNL2	Expressed in all tissues
dd_Smed_v6_1135_0_1	P09622	ENSG00000091140	dihydrolipoamide dehydrogenase	DLD	Expressed in all tissues
dd_Smed_v6_11353_0_1	Q8TBP6	ENSG00000075303	solute carrier family 25, member 40	SLC25A40	Expressed in all tissues
dd_Smed_v6_11358_0_1	Q9Y6J8	ENSG00000127952	serine/threonine/tyrosine interacting-like 1	STYXL1	Expressed in all tissues
dd_Smed_v6_11359_0_1	Q69YN2	ENSG00000095485	CWF19-like 1, cell cycle control (S. pombe)	CWF19L1	Expressed in all tissues
dd_Smed_v6_1136_0_1	P62877	ENSG00000100387	ring-box 1, E3 ubiquitin protein ligase	RBX1	Expressed in all tissues
dd_Smed_v6_11363_0_1	P49917	ENSG00000174405	ligase IV, DNA, ATP-dependent	LIG4	Expressed in all tissues
dd_Smed_v6_11365_0_1	P54198	ENSG00000100084	histone cell cycle regulator	HIRA	Expressed in all tissues
dd_Smed_v6_11366_0_1	Q96PY6	ENSG00000137601	NIMA-related kinase 1	NEK1	Expressed in all tissues
dd_Smed_v6_11370_0_1	Q96RK4	ENSG00000140463	Bardet-Biedl syndrome 4	BBS4	Expressed in all tissues
dd_Smed_v6_11372_0_1	Q99502	ENSG00000104313	eyes absent homolog 1 (Drosophila)	EYA1	Tissue enhanced	brain, prostate
dd_Smed_v6_11377_0_1	Q7Z4N2	ENSG00000134160	transient receptor potential cation channel, subfamily M, member 1	TRPM1	Group enriched	skin,testis
dd_Smed_v6_11382_0_1	Q9NRF2	ENSG00000178188	SH2B adaptor protein 1	SH2B1	Expressed in all tissues
dd_Smed_v6_11386_0_1	A1L162	ENSG00000204334	glutamate-rich 2	ERICH2	Tissue enriched	testis
dd_Smed_v6_11387_0_1	P51957	ENSG00000114904	NIMA-related kinase 4	NEK4	Expressed in all tissues
dd_Smed_v6_11392_0_1	Q96AG3	ENSG00000164209	solute carrier family 25, member 46	SLC25A46	Expressed in all tissues
dd_Smed_v6_11396_0_1	Q8TD08	ENSG00000181085	mitogen-activated protein kinase 15	MAPK15	Tissue enhanced	fallopian tube
dd_Smed_v6_1140_0_1	Q14204	ENSG00000197102	dynein, cytoplasmic 1, heavy chain 1	DYNC1H1	Expressed in all tissues
dd_Smed_v6_11401_0_1	A0JNW5	ENSG00000111647	UHRF1 binding protein 1-like	UHRF1BP1L	Expressed in all tissues
dd_Smed_v6_11404_0_1	Q12981	ENSG00000113734	BCL2/adenovirus E1B 19kDa interacting protein 1	BNIP1	Expressed in all tissues
dd_Smed_v6_11405_0_1	Q96AE7	ENSG00000052841	tetratricopeptide repeat domain 17	TTC17	Expressed in all tissues
dd_Smed_v6_11417_0_1	P27695	ENSG00000100823	APEX nuclease (multifunctional DNA repair enzyme) 1	APEX1	Expressed in all tissues
dd_Smed_v6_1142_0_1	Q9NPQ8	ENSG00000177963	RIC8 guanine nucleotide exchange factor A	RIC8A	Expressed in all tissues
dd_Smed_v6_11425_0_1	Q68CZ1	ENSG00000103494	RPGRIP1-like	RPGRIP1L	Tissue enhanced	testis
dd_Smed_v6_11428_0_1	Q3SYG4	ENSG00000122507	Bardet-Biedl syndrome 9	BBS9	Expressed in all tissues
dd_Smed_v6_11429_0_1	Q13464	ENSG00000067900	Rho-associated, coiled-coil containing protein kinase 1	ROCK1	Expressed in all tissues
dd_Smed_v6_1143_0_1	Q9BW91	ENSG00000170502	nudix (nucleoside diphosphate linked moiety X)-type motif 9	NUDT9	Expressed in all tissues
dd_Smed_v6_11434_0_1	P43246	ENSG00000095002	mutS homolog 2	MSH2	Expressed in all tissues
dd_Smed_v6_11436_0_1	Q6NSI8	ENSG00000162929	KIAA1841	KIAA1841	Expressed in all tissues
dd_Smed_v6_11439_0_1	Q9BUK6	ENSG00000125459	misato 1, mitochondrial distribution and morphology regulator	MSTO1	Expressed in all tissues
dd_Smed_v6_11441_0_1	Q9NXG2	ENSG00000066654	THUMP domain containing 1	THUMPD1	Expressed in all tissues
dd_Smed_v6_1145_0_1	O60551	ENSG00000152465	N-myristoyltransferase 2	NMT2	Expressed in all tissues
dd_Smed_v6_11453_0_1	Q92831	ENSG00000114166	K(lysine) acetyltransferase 2B	KAT2B	Expressed in all tissues
dd_Smed_v6_11458_0_1	Q96CB9	ENSG00000117481	NOP2/Sun domain family, member 4	NSUN4	Expressed in all tissues
dd_Smed_v6_1146_0_1	P84090	ENSG00000100632	enhancer of rudimentary homolog (Drosophila)	ERH	Expressed in all tissues
dd_Smed_v6_11462_0_1	Q86TZ1	ENSG00000139865	tetratricopeptide repeat domain 6	TTC6	Group enriched	prostate,testis
dd_Smed_v6_11464_0_1	Q9UPR3	ENSG00000198952	SMG5 nonsense mediated mRNA decay factor	SMG5	Expressed in all tissues
dd_Smed_v6_11465_0_1	Q9UKG9	ENSG00000005469	carnitine O-octanoyltransferase	CROT	Expressed in all tissues
dd_Smed_v6_1147_0_1	O14776	ENSG00000113649	transcription elongation regulator 1	TCERG1	Expressed in all tissues
dd_Smed_v6_11475_0_1	Q92878	ENSG00000113522	RAD50 homolog (S. cerevisiae)	RAD50	Expressed in all tissues
dd_Smed_v6_11478_0_1	P28328	ENSG00000164751	peroxisomal biogenesis factor 2	PEX2	Expressed in all tissues
dd_Smed_v6_1148_0_1	Q9HB07	ENSG00000139637	chromosome 12 open reading frame 10	C12orf10	Expressed in all tissues
dd_Smed_v6_11481_0_1	Q14957	ENSG00000161509	glutamate receptor, ionotropic, N-methyl D-aspartate 2C	GRIN2C	Tissue enhanced	heart muscle, salivary gland, thyroid gland
dd_Smed_v6_11485_0_1	P00395	ENSG00000198804	mitochondrially encoded cytochrome c oxidase I	MT-CO1	Expressed in all tissues
dd_Smed_v6_1149_0_1	Q99460	ENSG00000173692	proteasome (prosome, macropain) 26S subunit, non-ATPase, 1	PSMD1	Expressed in all tissues
dd_Smed_v6_11492_0_1	Q6IE81	ENSG00000077684	jade family PHD finger 1	JADE1	Expressed in all tissues
dd_Smed_v6_11495_0_1	Q9H3H1	ENSG00000043514	tRNA isopentenyltransferase 1	TRIT1	Expressed in all tissues
dd_Smed_v6_11507_0_1	O60287	ENSG00000142207	URB1 ribosome biogenesis 1 homolog (S. cerevisiae)	URB1	Expressed in all tissues
dd_Smed_v6_11510_0_1	Q92759	ENSG00000213780	general transcription factor IIH, polypeptide 4, 52kDa	GTF2H4	Expressed in all tissues
dd_Smed_v6_11513_1_1	O76054	ENSG00000100003	SEC14-like 2 (S. cerevisiae)	SEC14L2	Tissue enhanced	liver
dd_Smed_v6_11521_0_1	Q9H2C1	ENSG00000089116	LIM homeobox 5	LHX5	Not detected
dd_Smed_v6_11522_0_1	Q8TCD6	ENSG00000144362	phosphatase, orphan 2	PHOSPHO2	Expressed in all tissues
dd_Smed_v6_11524_0_1	Q9C0F1	ENSG00000164118	centrosomal protein 44kDa	CEP44	Expressed in all tissues
dd_Smed_v6_11525_0_1	Q9HBR0	ENSG00000157637	solute carrier family 38, member 10	SLC38A10	Expressed in all tissues
dd_Smed_v6_1153_0_1	O94906	ENSG00000101161	pre-mRNA processing factor 6	PRPF6	Expressed in all tissues
dd_Smed_v6_11534_0_1	Q6PJF5	ENSG00000129667	rhomboid 5 homolog 2 (Drosophila)	RHBDF2	Expressed in all tissues
dd_Smed_v6_1154_0_1	P28066	ENSG00000143106	proteasome (prosome, macropain) subunit, alpha type, 5	PSMA5	Expressed in all tissues
dd_Smed_v6_11544_0_1	O00255	ENSG00000133895	multiple endocrine neoplasia I	MEN1	Expressed in all tissues
dd_Smed_v6_11546_0_1	P35251	ENSG00000035928	replication factor C (activator 1) 1, 145kDa	RFC1	Expressed in all tissues
dd_Smed_v6_11547_0_1	Q8NA19	ENSG00000154655	l(3)mbt-like 4 (Drosophila)	L3MBTL4	Mixed
dd_Smed_v6_1155_0_1	P11226	ENSG00000165471	mannose-binding lectin (protein C) 2, soluble	MBL2	Tissue enriched	liver
dd_Smed_v6_11553_0_1	C9JJ37	ENSG00000222009	BTB (POZ) domain containing 19	BTBD19	Mixed
dd_Smed_v6_11557_0_1	Q8N157	ENSG00000135541	Abelson helper integration site 1	AHI1	Expressed in all tissues
dd_Smed_v6_11558_0_1	P49642	ENSG00000198056	primase, DNA, polypeptide 1 (49kDa)	PRIM1	Expressed in all tissues
dd_Smed_v6_1156_0_1	Q96GC9	ENSG00000062716	vacuole membrane protein 1	VMP1	Expressed in all tissues
dd_Smed_v6_1157_0_1	P53597	ENSG00000163541	succinate-CoA ligase, alpha subunit	SUCLG1	Expressed in all tissues
dd_Smed_v6_11571_0_1	Q5VWP2	ENSG00000183508	family with sequence similarity 46, member C	FAM46C	Mixed
dd_Smed_v6_11572_0_1	Q9BY32	ENSG00000125877	inosine triphosphatase (nucleoside triphosphate pyrophosphatase)	ITPA	Expressed in all tissues
dd_Smed_v6_11573_0_1	Q96I59	ENSG00000137513	asparaginyl-tRNA synthetase 2, mitochondrial (putative)	NARS2	Expressed in all tissues
dd_Smed_v6_11576_0_1	Q9BPZ7	ENSG00000119487	mitogen-activated protein kinase associated protein 1	MAPKAP1	Expressed in all tissues
dd_Smed_v6_1158_0_1	Q9NZZ3	ENSG00000086065	charged multivesicular body protein 5	CHMP5	Expressed in all tissues
dd_Smed_v6_11580_0_1	Q9UBS8	ENSG00000013561	ring finger protein 14	RNF14	Expressed in all tissues
dd_Smed_v6_11582_0_1	O15182	ENSG00000153140	centrin, EF-hand protein, 3	CETN3	Expressed in all tissues
dd_Smed_v6_11583_0_1	Q2NKX8	ENSG00000186871	excision repair cross-complementing rodent repair deficiency, complementation group 6-like	ERCC6L	Mixed
dd_Smed_v6_11586_0_1	Q96H72	ENSG00000165915	solute carrier family 39 (zinc transporter), member 13	SLC39A13	Expressed in all tissues
dd_Smed_v6_11593_0_1	Q96QE3	ENSG00000176208	ATPase family, AAA domain containing 5	ATAD5	Tissue enhanced	bone marrow
dd_Smed_v6_11602_0_1	Q8IZ69	ENSG00000099899	tRNA methyltransferase 2 homolog A (S. cerevisiae)	TRMT2A	Expressed in all tissues
dd_Smed_v6_1161_0_1	Q96RW7	ENSG00000143341	hemicentin 1	HMCN1	Mixed
dd_Smed_v6_11616_0_1	Q86VD7	ENSG00000181035	solute carrier family 25, member 42	SLC25A42	Expressed in all tissues
dd_Smed_v6_11619_0_1	Q8IZQ8	ENSG00000141052	myocardin	MYOCD	Mixed
dd_Smed_v6_11627_0_1	Q99986	ENSG00000100749	vaccinia related kinase 1	VRK1	Expressed in all tissues
dd_Smed_v6_11630_0_1	Q16572	ENSG00000187714	solute carrier family 18 (vesicular acetylcholine transporter), member 3	SLC18A3	Not detected
dd_Smed_v6_11642_0_1	Q96DP5	ENSG00000103707	mitochondrial methionyl-tRNA formyltransferase	MTFMT	Expressed in all tissues
dd_Smed_v6_1165_0_1	P47756	ENSG00000077549	capping protein (actin filament) muscle Z-line, beta	CAPZB	Expressed in all tissues
dd_Smed_v6_11651_0_1	Q9H8M7	ENSG00000148481	family with sequence similarity 188, member A	FAM188A	Expressed in all tissues
dd_Smed_v6_11653_0_1	Q92832	ENSG00000165973	NEL-like 1 (chicken)	NELL1	Tissue enhanced	brain, kidney
dd_Smed_v6_11655_0_1	P08514	ENSG00000005961	integrin, alpha 2b (platelet glycoprotein IIb of IIb/IIIa complex, antigen CD41)	ITGA2B	Tissue enhanced	bone marrow
dd_Smed_v6_1166_0_1	P63172	ENSG00000146425	dynein, light chain, Tctex-type 1	DYNLT1	Expressed in all tissues
dd_Smed_v6_11660_0_1	P54253	ENSG00000124788	ataxin 1	ATXN1	Expressed in all tissues
dd_Smed_v6_1167_0_1	P42574	ENSG00000164305	caspase 3, apoptosis-related cysteine peptidase	CASP3	Expressed in all tissues
dd_Smed_v6_11678_0_1	Q96F25	ENSG00000172339	ALG14, UDP-N-acetylglucosaminyltransferase subunit	ALG14	Expressed in all tissues
dd_Smed_v6_11679_0_1	O95260	ENSG00000107669	arginyltransferase 1	ATE1	Expressed in all tissues
dd_Smed_v6_1168_0_1	Q7L5Y9	ENSG00000090316	macrophage erythroblast attacher	MAEA	Expressed in all tissues
dd_Smed_v6_11680_0_1	Q9C0B9	ENSG00000141664	zinc finger, CCHC domain containing 2	ZCCHC2	Expressed in all tissues
dd_Smed_v6_11682_0_1	Q9NUQ7	ENSG00000109775	UFM1-specific peptidase 2	UFSP2	Expressed in all tissues
dd_Smed_v6_11684_0_1	Q8IY26	ENSG00000205808	phosphatidic acid phosphatase type 2 domain containing 2	PPAPDC2	Mixed
dd_Smed_v6_11689_0_1	C9J069	ENSG00000232434	chromosome 9 open reading frame 172	C9orf172	Tissue enhanced	brain
dd_Smed_v6_1169_0_1	Q9Y5S9	ENSG00000131795	RNA binding motif protein 8A	RBM8A	Expressed in all tissues
dd_Smed_v6_11693_0_1	Q13207	ENSG00000121068	T-box 2	TBX2	Tissue enhanced	lung
dd_Smed_v6_117_0_1	P46783	ENSG00000124614	ribosomal protein S10	RPS10	Expressed in all tissues
dd_Smed_v6_11711_0_1	Q6PHR2	ENSG00000140474	unc-51 like kinase 3	ULK3	Expressed in all tissues
dd_Smed_v6_11714_0_1	O75469	ENSG00000144852	nuclear receptor subfamily 1, group I, member 2	NR1I2	Group enriched	colon,duodenum,gallbladder,liver,rectum,small intestine
dd_Smed_v6_11717_0_1	Q9NS87	ENSG00000163808	kinesin family member 15	KIF15	Tissue enhanced	testis
dd_Smed_v6_11718_0_1	Q8IYD8	ENSG00000187790	Fanconi anemia, complementation group M	FANCM	Mixed
dd_Smed_v6_11719_0_1	Q8N2A8	ENSG00000179598	phospholipase D family, member 6	PLD6	Expressed in all tissues
dd_Smed_v6_1172_0_1	Q9HAV7	ENSG00000109519	GrpE-like 1, mitochondrial (E. coli)	GRPEL1	Expressed in all tissues
dd_Smed_v6_11720_0_1	Q8N8U2	ENSG00000166446	chromodomain protein, Y-like 2	CDYL2	Mixed
dd_Smed_v6_11722_0_1	Q969S6	ENSG00000187713	transmembrane protein 203	TMEM203	Expressed in all tissues
dd_Smed_v6_11725_0_1	Q86UW7	ENSG00000081803	Ca++-dependent secretion activator 2	CADPS2	Mixed
dd_Smed_v6_11728_0_1	Q96MI9	ENSG00000166748	ATP/GTP binding protein-like 1	AGBL1	Tissue enhanced	lung, prostate, skeletal muscle
dd_Smed_v6_11729_0_1	P11940	ENSG00000070756	poly(A) binding protein, cytoplasmic 1	PABPC1	Expressed in all tissues
dd_Smed_v6_11736_0_1	Q96EP1	ENSG00000072609	checkpoint with forkhead and ring finger domains, E3 ubiquitin protein ligase	CHFR	Expressed in all tissues
dd_Smed_v6_1174_0_1	P46977	ENSG00000134910	STT3A, subunit of the oligosaccharyltransferase complex (catalytic)	STT3A	Expressed in all tissues
dd_Smed_v6_11741_0_1	O75752	ENSG00000169255	beta-1,3-N-acetylgalactosaminyltransferase 1 (globoside blood group)	B3GALNT1	Mixed
dd_Smed_v6_11746_0_1	Q8WXH5	ENSG00000180008	suppressor of cytokine signaling 4	SOCS4	Expressed in all tissues
dd_Smed_v6_11757_0_1	P0C2W1	ENSG00000174013	F-box protein 45	FBXO45	Expressed in all tissues
dd_Smed_v6_1176_0_1	P62195	ENSG00000087191	proteasome (prosome, macropain) 26S subunit, ATPase, 5	PSMC5	Expressed in all tissues
dd_Smed_v6_11764_0_1	Q9H814	ENSG00000164902	phosphorylated adaptor for RNA export	PHAX	Expressed in all tissues
dd_Smed_v6_11770_0_1	Q6ZRR9	ENSG00000170959	doublecortin domain containing 1	DCDC1	Tissue enhanced	fallopian tube, gallbladder, testis
dd_Smed_v6_11778_0_1	Q8NE09	ENSG00000132554	regulator of G-protein signaling 22	RGS22	Tissue enhanced	testis
dd_Smed_v6_1179_0_1	P50993	ENSG00000018625	ATPase, Na+/K+ transporting, alpha 2 polypeptide	ATP1A2	Tissue enhanced	brain, skeletal muscle
dd_Smed_v6_11790_0_1	Q14696	ENSG00000117899	mesoderm development candidate 2	MESDC2	Expressed in all tissues
dd_Smed_v6_1180_0_1	Q16513	ENSG00000065243	protein kinase N2	PKN2	Expressed in all tissues
dd_Smed_v6_11800_0_1	A2RUB6	ENSG00000180376	coiled-coil domain containing 66	CCDC66	Expressed in all tissues
dd_Smed_v6_11809_0_1	O15031	ENSG00000196576	plexin B2	PLXNB2	Expressed in all tissues
dd_Smed_v6_11811_0_1	Q8TB52	ENSG00000118496	F-box protein 30	FBXO30	Expressed in all tissues
dd_Smed_v6_11826_0_1	Q8NF50	ENSG00000107099	dedicator of cytokinesis 8	DOCK8	Expressed in all tissues
dd_Smed_v6_11828_0_1	A6NE52	ENSG00000179698	KIAA1875	KIAA1875	Tissue enriched	testis
dd_Smed_v6_1183_0_1	O60739	ENSG00000114784	eukaryotic translation initiation factor 1B	EIF1B	Expressed in all tissues
dd_Smed_v6_11833_0_1	Q8IV50	ENSG00000140280	LysM, putative peptidoglycan-binding, domain containing 2	LYSMD2	Expressed in all tissues
dd_Smed_v6_1184_0_1	P62873	ENSG00000078369	guanine nucleotide binding protein (G protein), beta polypeptide 1	GNB1	Expressed in all tissues
dd_Smed_v6_11843_0_1	P50440	ENSG00000171766	glycine amidinotransferase (L-arginine:glycine amidinotransferase)	GATM	Expressed in all tissues
dd_Smed_v6_11847_0_1	Q9H2M9	ENSG00000118873	RAB3 GTPase activating protein subunit 2 (non-catalytic)	RAB3GAP2	Expressed in all tissues
dd_Smed_v6_11853_0_1	Q9GZR1	ENSG00000112701	SUMO1/sentrin specific peptidase 6	SENP6	Expressed in all tissues
dd_Smed_v6_11856_0_1	Q53RE8	ENSG00000213337	ankyrin repeat domain 39	ANKRD39	Expressed in all tissues
dd_Smed_v6_11857_0_1	Q9NRD0	ENSG00000164117	F-box protein 8	FBXO8	Expressed in all tissues
dd_Smed_v6_1186_0_1	Q9Y6M9	ENSG00000147684	NADH dehydrogenase (ubiquinone) 1 beta subcomplex, 9, 22kDa	NDUFB9	Expressed in all tissues
dd_Smed_v6_11862_0_1	Q9UNW1	ENSG00000107789	multiple inositol-polyphosphate phosphatase 1	MINPP1	Expressed in all tissues
dd_Smed_v6_11874_0_1	O14830	ENSG00000156194	protein phosphatase, EF-hand calcium binding domain 2	PPEF2	Not detected
dd_Smed_v6_11876_0_1	P78504	ENSG00000101384	jagged 1	JAG1	Expressed in all tissues
dd_Smed_v6_11877_0_1	Q567V2	ENSG00000254858	MPV17 mitochondrial membrane protein-like 2	MPV17L2	Expressed in all tissues
dd_Smed_v6_11882_0_1	Q8IUR7	ENSG00000114098	armadillo repeat containing 8	ARMC8	Expressed in all tissues
dd_Smed_v6_11884_0_1	Q9H0I3	ENSG00000103021	coiled-coil domain containing 113	CCDC113	Tissue enhanced	fallopian tube
dd_Smed_v6_11888_0_1	Q8TCJ0	ENSG00000147364	F-box protein 25	FBXO25	Expressed in all tissues
dd_Smed_v6_1189_0_1	P55809	ENSG00000083720	3-oxoacid CoA transferase 1	OXCT1	Tissue enhanced	heart muscle
dd_Smed_v6_11894_0_1	Q8NEE8	ENSG00000167094	tetratricopeptide repeat domain 16	TTC16	Group enriched	fallopian tube,testis
dd_Smed_v6_1190_0_1	Q07021	ENSG00000108561	complement component 1, q subcomponent binding protein	C1QBP	Expressed in all tissues
dd_Smed_v6_11901_0_1	Q9Y256	ENSG00000173653	Ras converting CAAX endopeptidase 1	RCE1	Expressed in all tissues
dd_Smed_v6_11903_0_1	Q5GH73	ENSG00000171044	XK, Kell blood group complex subunit-related family, member 6	XKR6	Mixed
dd_Smed_v6_11904_0_1	P0CG48	ENSG00000150991	ubiquitin C	UBC	Expressed in all tissues
dd_Smed_v6_11909_0_1	Q8N7U6	ENSG00000163576	EF-hand domain family, member B	EFHB	Tissue enhanced	fallopian tube, testis
dd_Smed_v6_11910_0_1	Q9HC97	ENSG00000178623	G protein-coupled receptor 35	GPR35	Tissue enhanced	duodenum, small intestine
dd_Smed_v6_11911_0_1	P41134	ENSG00000125968	inhibitor of DNA binding 1, dominant negative helix-loop-helix protein	ID1	Expressed in all tissues
dd_Smed_v6_11912_0_1	Q9HBG6	ENSG00000163913	intraflagellar transport 122 homolog (Chlamydomonas)	IFT122	Expressed in all tissues
dd_Smed_v6_11914_0_1	P18405	ENSG00000145545	steroid-5-alpha-reductase, alpha polypeptide 1 (3-oxo-5 alpha-steroid delta 4-dehydrogenase alpha 1)	SRD5A1	Mixed
dd_Smed_v6_11926_1_1	Q0P6H9	ENSG00000137842	transmembrane protein 62	TMEM62	Expressed in all tissues
dd_Smed_v6_11927_0_1	Q86Y97	ENSG00000133247	suppressor of variegation 4-20 homolog 2 (Drosophila)	SUV420H2	Expressed in all tissues
dd_Smed_v6_11928_0_1	Q9BXR0	ENSG00000213339	queuine tRNA-ribosyltransferase 1	QTRT1	Expressed in all tissues
dd_Smed_v6_11931_0_1	Q8NFR7	ENSG00000153237	coiled-coil domain containing 148	CCDC148	Tissue enhanced	fallopian tube, testis
dd_Smed_v6_11933_0_1	Q8N5Y8	ENSG00000138617	poly (ADP-ribose) polymerase family, member 16	PARP16	Expressed in all tissues
dd_Smed_v6_11934_0_1	Q9UIW2	ENSG00000114554	plexin A1	PLXNA1	Mixed
dd_Smed_v6_11939_0_1	P31321	ENSG00000188191	protein kinase, cAMP-dependent, regulatory, type I, beta	PRKAR1B	Tissue enriched	brain
dd_Smed_v6_11943_0_1	Q86YW9	ENSG00000144893	mediator complex subunit 12-like	MED12L	Tissue enhanced	brain, testis
dd_Smed_v6_11944_0_1	Q16394	ENSG00000182197	exostosin glycosyltransferase 1	EXT1	Expressed in all tissues
dd_Smed_v6_1196_0_1	Q9NVA4	ENSG00000164168	transmembrane protein 184C	TMEM184C	Expressed in all tissues
dd_Smed_v6_11961_0_1	Q9BSH3	ENSG00000145029	nicolin 1	NICN1	Expressed in all tissues
dd_Smed_v6_11962_0_1	Q9Y5L3	ENSG00000054179	ectonucleoside triphosphate diphosphohydrolase 2	ENTPD2	Mixed
dd_Smed_v6_11963_0_1	Q9NZQ0	ENSG00000115137	DnaJ (Hsp40) homolog, subfamily C, member 27	DNAJC27	Expressed in all tissues
dd_Smed_v6_11969_0_1	O75154	ENSG00000090565	RAB11 family interacting protein 3 (class II)	RAB11FIP3	Tissue enriched	kidney
dd_Smed_v6_1197_0_1	Q92896	ENSG00000090863	golgi glycoprotein 1	GLG1	Expressed in all tissues
dd_Smed_v6_11975_0_1	O95343	ENSG00000138083	SIX homeobox 3	SIX3	Not detected
dd_Smed_v6_11976_0_1	Q96LT4	ENSG00000156671	sterile alpha motif domain containing 8	SAMD8	Expressed in all tissues
dd_Smed_v6_11981_0_1	O14795	ENSG00000198722	unc-13 homolog B (C. elegans)	UNC13B	Mixed
dd_Smed_v6_11982_0_1	Q96S44	ENSG00000172315	TP53 regulating kinase	TP53RK	Expressed in all tissues
dd_Smed_v6_11990_0_1	Q9BRX9	ENSG00000123154	WD repeat domain 83	WDR83	Expressed in all tissues
dd_Smed_v6_11993_0_1	Q8TBZ2	ENSG00000136449	MYCBP associated protein	MYCBPAP	Tissue enriched	testis
dd_Smed_v6_12000_0_1	Q13395	ENSG00000059588	TAR (HIV-1) RNA binding protein 1	TARBP1	Expressed in all tissues
dd_Smed_v6_12008_0_1	Q96NL0	ENSG00000105784	RUN domain containing 3B	RUNDC3B	Tissue enhanced	adrenal gland
dd_Smed_v6_1201_0_1	Q14376	ENSG00000117308	UDP-galactose-4-epimerase	GALE	Expressed in all tissues
dd_Smed_v6_12010_0_1	O14753	ENSG00000172818	ovo-like zinc finger 1	OVOL1	Tissue enhanced	esophagus
dd_Smed_v6_12011_0_1	A6NNP5	ENSG00000242715	coiled-coil domain containing 169	CCDC169	Tissue enriched	testis
dd_Smed_v6_12021_0_1	Q6ZYL4	ENSG00000272047	general transcription factor IIH, polypeptide 5	GTF2H5	Mixed
dd_Smed_v6_12024_0_1	Q8TF42	ENSG00000154127	ubiquitin associated and SH3 domain containing B	UBASH3B	Tissue enhanced	placenta
dd_Smed_v6_12026_0_1	Q92611	ENSG00000134109	ER degradation enhancer, mannosidase alpha-like 1	EDEM1	Expressed in all tissues
dd_Smed_v6_12029_0_1	Q9H0R6	ENSG00000130348	glutaminyl-tRNA synthase (glutamine-hydrolyzing)-like 1	QRSL1	Expressed in all tissues
dd_Smed_v6_1203_0_1	Q8TCT9	ENSG00000101294	histocompatibility (minor) 13	HM13	Expressed in all tissues
dd_Smed_v6_12033_0_1	P27701	ENSG00000085117	CD82 molecule	CD82	Expressed in all tissues
dd_Smed_v6_1204_0_1	Q13541	ENSG00000187840	eukaryotic translation initiation factor 4E binding protein 1	EIF4EBP1	Expressed in all tissues
dd_Smed_v6_12042_0_1	Q9HAV4	ENSG00000124571	exportin 5	XPO5	Expressed in all tissues
dd_Smed_v6_12043_0_1	Q8N4P6	ENSG00000160838	leucine rich repeat containing 71	LRRC71	Group enriched	fallopian tube,testis
dd_Smed_v6_1205_0_1	Q9UPN3	ENSG00000127603	microtubule-actin crosslinking factor 1	MACF1	Expressed in all tissues
dd_Smed_v6_12053_0_1	Q8TEQ8	ENSG00000165282	phosphatidylinositol glycan anchor biosynthesis, class O	PIGO	Expressed in all tissues
dd_Smed_v6_12055_0_1	Q8IYE1	ENSG00000244607	coiled-coil domain containing 13	CCDC13	Tissue enhanced	fallopian tube
dd_Smed_v6_12056_0_1	Q7Z4L5	ENSG00000123607	tetratricopeptide repeat domain 21B	TTC21B	Expressed in all tissues
dd_Smed_v6_12057_0_1	Q6ZMY6	ENSG00000166359	WD repeat domain 88	WDR88	Tissue enriched	testis
dd_Smed_v6_12059_0_1	Q9UER7	ENSG00000204209	death-domain associated protein	DAXX	Expressed in all tissues
dd_Smed_v6_1206_0_1	O60760	ENSG00000163106	hematopoietic prostaglandin D synthase	HPGDS	Tissue enhanced	placenta
dd_Smed_v6_12067_0_1	Q96FV0	ENSG00000141294	leucine rich repeat containing 46	LRRC46	Group enriched	fallopian tube,testis
dd_Smed_v6_12076_0_1	Q6PI48	ENSG00000117593	aspartyl-tRNA synthetase 2, mitochondrial	DARS2	Expressed in all tissues
dd_Smed_v6_1208_0_1	P53618	ENSG00000129083	coatomer protein complex, subunit beta 1	COPB1	Expressed in all tissues
dd_Smed_v6_12081_0_1	Q96IC2	ENSG00000005189	Putative RNA exonuclease NEF-sp	AC004381.6	Tissue enriched	testis
dd_Smed_v6_12089_0_1	Q9H501	ENSG00000089048	ESF1, nucleolar pre-rRNA processing protein, homolog (S. cerevisiae)	ESF1	Expressed in all tissues
dd_Smed_v6_1209_0_1	Q9H8Y8	ENSG00000115806	golgi reassembly stacking protein 2, 55kDa	GORASP2	Expressed in all tissues
dd_Smed_v6_12091_0_1	Q6NT04	ENSG00000140993	tigger transposable element derived 7	TIGD7	Mixed
dd_Smed_v6_12096_0_1	Q96SD1	ENSG00000152457	DNA cross-link repair 1C	DCLRE1C	Expressed in all tissues
dd_Smed_v6_121_0_1	P62979	ENSG00000143947	ribosomal protein S27a	RPS27A	Expressed in all tissues
dd_Smed_v6_12104_0_1	Q8N9N2	ENSG00000138303	activating signal cointegrator 1 complex subunit 1	ASCC1	Expressed in all tissues
dd_Smed_v6_12107_0_1	Q96ER9	ENSG00000164051	coiled-coil domain containing 51	CCDC51	Expressed in all tissues
dd_Smed_v6_1211_0_1	Q96T60	ENSG00000039650	polynucleotide kinase 3'-phosphatase	PNKP	Expressed in all tissues
dd_Smed_v6_12111_0_1	O75094	ENSG00000184347	slit homolog 3 (Drosophila)	SLIT3	Mixed
dd_Smed_v6_12112_0_1	P63096	ENSG00000127955	guanine nucleotide binding protein (G protein), alpha inhibiting activity polypeptide 1	GNAI1	Expressed in all tissues
dd_Smed_v6_12122_0_1	Q96NW4	ENSG00000105186	ankyrin repeat domain 27 (VPS9 domain)	ANKRD27	Expressed in all tissues
dd_Smed_v6_12126_1_1	O95149	ENSG00000169371	snurportin 1	SNUPN	Expressed in all tissues
dd_Smed_v6_12130_0_1	Q2NKQ1	ENSG00000167037	small G protein signaling modulator 1	SGSM1	Tissue enhanced	heart muscle
dd_Smed_v6_12132_0_1	O75414	ENSG00000172113	NME/NM23 nucleoside diphosphate kinase 6	NME6	Expressed in all tissues
dd_Smed_v6_12138_0_1	Q8IWF2	ENSG00000100350	FAD-dependent oxidoreductase domain containing 2	FOXRED2	Expressed in all tissues
dd_Smed_v6_1214_0_1	Q9H0N5	ENSG00000132570	pterin-4 alpha-carbinolamine dehydratase/dimerization cofactor of hepatocyte nuclear factor 1 alpha (TCF1) 2	PCBD2	Expressed in all tissues
dd_Smed_v6_12142_0_1	Q9H7Z3	ENSG00000119720	NRDE-2, necessary for RNA interference, domain containing	NRDE2	Expressed in all tissues
dd_Smed_v6_12150_0_1	Q9H0A6	ENSG00000105982	ring finger protein 32	RNF32	Tissue enriched	testis
dd_Smed_v6_12161_0_1	Q6P2C0	ENSG00000140527	WD repeat domain 93	WDR93	Group enriched	fallopian tube,testis
dd_Smed_v6_12168_0_1	A8K855	ENSG00000203965	EF-hand calcium binding domain 7	EFCAB7	Expressed in all tissues
dd_Smed_v6_1217_0_1	Q96A72	ENSG00000111196	mago-nashi homolog B (Drosophila)	MAGOHB	Expressed in all tissues
dd_Smed_v6_12176_0_1	P49137	ENSG00000162889	mitogen-activated protein kinase-activated protein kinase 2	MAPKAPK2	Expressed in all tissues
dd_Smed_v6_1218_0_1	Q14847	ENSG00000002834	LIM and SH3 protein 1	LASP1	Expressed in all tissues
dd_Smed_v6_12183_0_1	Q6XQN6	ENSG00000147813	nicotinate phosphoribosyltransferase domain containing 1	NAPRT1	Expressed in all tissues
dd_Smed_v6_12188_0_1	Q5RL73	ENSG00000127993	RNA binding motif protein 48	RBM48	Expressed in all tissues
dd_Smed_v6_1219_1_1	Q9BYD5	ENSG00000105427	cornifelin	CNFN	Group enriched	esophagus,skin,tonsil
dd_Smed_v6_12192_0_1	O95803	ENSG00000164100	N-deacetylase/N-sulfotransferase (heparan glucosaminyl) 3	NDST3	Tissue enhanced	brain, spleen
dd_Smed_v6_12194_0_1	Q9Y6R0	ENSG00000105245	numb homolog (Drosophila)-like	NUMBL	Expressed in all tissues
dd_Smed_v6_122_1_1	P38571	ENSG00000107798	lipase A, lysosomal acid, cholesterol esterase	LIPA	Expressed in all tissues
dd_Smed_v6_1220_0_1	O15372	ENSG00000147677	eukaryotic translation initiation factor 3, subunit H	EIF3H	Expressed in all tissues
dd_Smed_v6_12202_0_1	Q86TU7	ENSG00000183576	SET domain containing 3	SETD3	Expressed in all tissues
dd_Smed_v6_1221_0_1	Q9UJU6	ENSG00000136279	drebrin-like	DBNL	Expressed in all tissues
dd_Smed_v6_12213_0_1	Q96DB5	ENSG00000176623	regulator of microtubule dynamics 1	RMDN1	Expressed in all tissues
dd_Smed_v6_1222_0_1	P62191	ENSG00000100764	proteasome (prosome, macropain) 26S subunit, ATPase, 1	PSMC1	Expressed in all tissues
dd_Smed_v6_12221_0_1	Q5T2R2	ENSG00000148459	prenyl (decaprenyl) diphosphate synthase, subunit 1	PDSS1	Mixed
dd_Smed_v6_12222_0_1	Q12770	ENSG00000114650	SREBF chaperone	SCAP	Expressed in all tissues
dd_Smed_v6_12228_0_1	Q9UPV0	ENSG00000110274	centrosomal protein 164kDa	CEP164	Expressed in all tissues
dd_Smed_v6_12229_0_1	P43354	ENSG00000153234	nuclear receptor subfamily 4, group A, member 2	NR4A2	Tissue enhanced	adrenal gland
dd_Smed_v6_1223_0_1	Q99497	ENSG00000116288	parkinson protein 7	PARK7	Expressed in all tissues
dd_Smed_v6_12232_0_1	Q8TBZ3	ENSG00000140153	WD repeat domain 20	WDR20	Expressed in all tissues
dd_Smed_v6_12234_0_1	Q12986	ENSG00000086102	nuclear transcription factor, X-box binding 1	NFX1	Expressed in all tissues
dd_Smed_v6_12242_0_1	Q8IZP7	ENSG00000185352	heparan sulfate 6-O-sulfotransferase 3	HS6ST3	Tissue enhanced	brain, urinary bladder
dd_Smed_v6_12249_0_1	Q9BQA5	ENSG00000172273	histone H4 transcription factor	HINFP	Expressed in all tissues
dd_Smed_v6_1226_0_1	P22557	ENSG00000158578	aminolevulinate, delta-, synthase 2	ALAS2	Tissue enriched	bone marrow
dd_Smed_v6_12261_0_1	Q9NZ71	ENSG00000258366	regulator of telomere elongation helicase 1	RTEL1	Expressed in all tissues
dd_Smed_v6_12264_0_1	O43474	ENSG00000136826	Kruppel-like factor 4 (gut)	KLF4	Expressed in all tissues
dd_Smed_v6_12265_0_1	Q9GZY0	ENSG00000185554	nuclear RNA export factor 2	NXF2	Tissue enriched	testis
dd_Smed_v6_12265_0_1	Q9GZY0	ENSG00000185945	nuclear RNA export factor 2B	NXF2B	Tissue enriched	testis
dd_Smed_v6_12270_0_1	O75427	ENSG00000077454	leucine-rich repeats and calponin homology (CH) domain containing 4	LRCH4	Expressed in all tissues
dd_Smed_v6_12275_0_1	Q9Y4J8	ENSG00000134769	dystrobrevin, alpha	DTNA	Tissue enhanced	brain, heart muscle
dd_Smed_v6_12278_0_1	Q8IUD2	ENSG00000082805	ELKS/RAB6-interacting/CAST family member 1	ERC1	Expressed in all tissues
dd_Smed_v6_12279_0_1	Q8N8A6	ENSG00000185163	DEAD (Asp-Glu-Ala-Asp) box polypeptide 51	DDX51	Expressed in all tissues
dd_Smed_v6_1229_0_1	P00568	ENSG00000106992	adenylate kinase 1	AK1	Expressed in all tissues
dd_Smed_v6_12292_0_1	Q9H9B4	ENSG00000164466	sideroflexin 1	SFXN1	Expressed in all tissues
dd_Smed_v6_123_0_1	P60866	ENSG00000008988	ribosomal protein S20	RPS20	Expressed in all tissues
dd_Smed_v6_12302_0_1	Q9P1Z9	ENSG00000197816	coiled-coil domain containing 180	CCDC180	Tissue enhanced	testis
dd_Smed_v6_12307_0_1	Q13136	ENSG00000131626	protein tyrosine phosphatase, receptor type, f polypeptide (PTPRF), interacting protein (liprin), alpha 1	PPFIA1	Expressed in all tissues
dd_Smed_v6_1231_0_1	P55036	ENSG00000159352	proteasome (prosome, macropain) 26S subunit, non-ATPase, 4	PSMD4	Expressed in all tissues
dd_Smed_v6_12317_0_1	P50222	ENSG00000106511	mesenchyme homeobox 2	MEOX2	Tissue enhanced	placenta
dd_Smed_v6_12319_0_1	P54252	ENSG00000066427	ataxin 3	ATXN3	Expressed in all tissues
dd_Smed_v6_12325_0_1	Q6YHU6	ENSG00000115970	thyroid adenoma associated	THADA	Expressed in all tissues
dd_Smed_v6_12333_0_1	Q7L3T8	ENSG00000162396	prolyl-tRNA synthetase 2, mitochondrial (putative)	PARS2	Mixed
dd_Smed_v6_12337_0_1	Q13324	ENSG00000106113	corticotropin releasing hormone receptor 2	CRHR2	Not detected
dd_Smed_v6_12339_0_1	Q9H0I2	ENSG00000124074	enkurin domain containing 1	ENKD1	Expressed in all tissues
dd_Smed_v6_12345_0_1	Q9NQT5	ENSG00000107371	exosome component 3	EXOSC3	Expressed in all tissues
dd_Smed_v6_1235_0_1	O14818	ENSG00000101182	proteasome (prosome, macropain) subunit, alpha type, 7	PSMA7	Expressed in all tissues
dd_Smed_v6_12354_0_1	Q8N309	ENSG00000158113	leucine rich repeat containing 43	LRRC43	Tissue enhanced	fallopian tube
dd_Smed_v6_12358_0_1	Q12767	ENSG00000177728	KIAA0195	KIAA0195	Expressed in all tissues
dd_Smed_v6_1236_0_1	Q9BV86	ENSG00000148335	N-terminal Xaa-Pro-Lys N-methyltransferase 1	NTMT1	Expressed in all tissues
dd_Smed_v6_12363_0_1	Q5VT97	ENSG00000097096	synapse defective 1, Rho GTPase, homolog 2 (C. elegans)	SYDE2	Mixed
dd_Smed_v6_12371_0_1	O15379	ENSG00000171720	histone deacetylase 3	HDAC3	Expressed in all tissues
dd_Smed_v6_12372_0_1	Q92743	ENSG00000166033	HtrA serine peptidase 1	HTRA1	Tissue enhanced	placenta
dd_Smed_v6_12376_0_1	Q7Z402	ENSG00000170537	transmembrane channel-like 7	TMC7	Tissue enhanced	testis
dd_Smed_v6_12378_0_1	A6NFT4	ENSG00000186710	coiled-coil domain containing 42B	CCDC42B	Tissue enriched	fallopian tube
dd_Smed_v6_12379_0_1	Q9Y3C7	ENSG00000108590	mediator complex subunit 31	MED31	Expressed in all tissues
dd_Smed_v6_1238_0_1	P30049	ENSG00000099624	ATP synthase, H+ transporting, mitochondrial F1 complex, delta subunit	ATP5D	Expressed in all tissues
dd_Smed_v6_12380_0_1	Q8TF76	ENSG00000177602	germ cell associated 2 (haspin)	GSG2	Tissue enhanced	testis, tonsil
dd_Smed_v6_12381_0_1	O95395	ENSG00000140297	glucosaminyl (N-acetyl) transferase 3, mucin type	GCNT3	Tissue enhanced	colon, rectum, small intestine
dd_Smed_v6_1239_0_1	P61224	ENSG00000127314	RAP1B, member of RAS oncogene family	RAP1B	Expressed in all tissues
dd_Smed_v6_12396_0_1	Q8WXU2	ENSG00000256061	dyslexia susceptibility 1 candidate 1	DYX1C1	Tissue enhanced	fallopian tube
dd_Smed_v6_1241_0_1	P49720	ENSG00000108294	proteasome (prosome, macropain) subunit, beta type, 3	PSMB3	Expressed in all tissues
dd_Smed_v6_12412_0_1	Q8IYR2	ENSG00000186532	SET and MYND domain containing 4	SMYD4	Expressed in all tissues
dd_Smed_v6_12419_0_1	Q9NU22	ENSG00000112159	MDN1, midasin homolog (yeast)	MDN1	Expressed in all tissues
dd_Smed_v6_12428_0_1	Q6ZU64	ENSG00000181378	coiled-coil domain containing 108	CCDC108	Group enriched	fallopian tube,testis
dd_Smed_v6_12436_0_1	O60513	ENSG00000121578	UDP-Gal:betaGlcNAc beta 1,4- galactosyltransferase, polypeptide 4	B4GALT4	Expressed in all tissues
dd_Smed_v6_12446_0_1	Q9UI43	ENSG00000122687	FtsJ RNA methyltransferase homolog 2 (E. coli)	FTSJ2	Expressed in all tissues
dd_Smed_v6_12447_0_1	Q99708	ENSG00000101773	retinoblastoma binding protein 8	RBBP8	Mixed
dd_Smed_v6_12448_0_1	Q8NEF3	ENSG00000164221	coiled-coil domain containing 112	CCDC112	Tissue enhanced	testis
dd_Smed_v6_12458_0_1	Q9BQB6	ENSG00000167397	vitamin K epoxide reductase complex, subunit 1	VKORC1	Expressed in all tissues
dd_Smed_v6_12464_0_1	Q86UV5	ENSG00000090686	ubiquitin specific peptidase 48	USP48	Expressed in all tissues
dd_Smed_v6_12465_0_1	Q9NRH2	ENSG00000163788	SNF related kinase	SNRK	Expressed in all tissues
dd_Smed_v6_1247_0_1	P05165	ENSG00000175198	propionyl CoA carboxylase, alpha polypeptide	PCCA	Expressed in all tissues
dd_Smed_v6_12476_0_1	Q9NU02	ENSG00000132623	ankyrin repeat and EF-hand domain containing 1	ANKEF1	Tissue enhanced	testis
dd_Smed_v6_12478_0_1	O60671	ENSG00000113456	RAD1 homolog (S. pombe)	RAD1	Expressed in all tissues
dd_Smed_v6_12480_0_1	Q9NVE4	ENSG00000182791	coiled-coil domain containing 87	CCDC87	Tissue enriched	testis
dd_Smed_v6_12484_0_1	A8K8P3	ENSG00000198089	Sfi1 homolog, spindle assembly associated (yeast)	SFI1	Expressed in all tissues
dd_Smed_v6_1249_0_1	P55786	ENSG00000141279	aminopeptidase puromycin sensitive	NPEPPS	Expressed in all tissues
dd_Smed_v6_12491_0_1	Q9UDW3	ENSG00000100319	zinc finger, matrin-type 5	ZMAT5	Expressed in all tissues
dd_Smed_v6_12492_0_1	Q16533	ENSG00000023608	small nuclear RNA activating complex, polypeptide 1, 43kDa	SNAPC1	Expressed in all tissues
dd_Smed_v6_1250_0_1	Q9Y4W6	ENSG00000141385	AFG3-like AAA ATPase 2	AFG3L2	Expressed in all tissues
dd_Smed_v6_12505_0_1	Q8NEL9	ENSG00000100523	DDHD domain containing 1	DDHD1	Expressed in all tissues
dd_Smed_v6_12507_0_1	P0CG08	ENSG00000188092	G protein-coupled receptor 89B	GPR89B	Expressed in all tissues
dd_Smed_v6_12514_0_1	Q9NVR7	ENSG00000113838	TBCC domain containing 1	TBCCD1	Expressed in all tissues
dd_Smed_v6_12515_0_1	Q9P2S6	ENSG00000144504	ankyrin repeat and MYND domain containing 1	ANKMY1	Expressed in all tissues
dd_Smed_v6_12517_0_1	Q7Z4M0	ENSG00000183324	chromosome 15 open reading frame 60	C15orf60	Tissue enriched	testis
dd_Smed_v6_12520_0_1	O75161	ENSG00000131697	nephronophthisis 4	NPHP4	Mixed
dd_Smed_v6_12523_0_1	Q63HM1	ENSG00000183077	arylformamidase	AFMID	Expressed in all tissues
dd_Smed_v6_12524_0_1	Q5JU00	ENSG00000146221	t-complex-associated-testis-expressed 1	TCTE1	Group enriched	fallopian tube,testis
dd_Smed_v6_12525_0_1	Q96GW9	ENSG00000247626	methionyl-tRNA synthetase 2, mitochondrial	MARS2	Expressed in all tissues
dd_Smed_v6_12533_0_1	Q5VU57	ENSG00000186094	ATP/GTP binding protein-like 4	AGBL4	Tissue enhanced	brain, fallopian tube
dd_Smed_v6_12535_0_1	P17787	ENSG00000160716	cholinergic receptor, nicotinic, beta 2 (neuronal)	CHRNB2	Tissue enriched	brain
dd_Smed_v6_1254_0_1	P08574	ENSG00000179091	cytochrome c-1	CYC1	Expressed in all tissues
dd_Smed_v6_12541_0_1	Q9H069	ENSG00000171962	leucine rich repeat containing 48	LRRC48	Tissue enhanced	fallopian tube
dd_Smed_v6_12545_0_1	Q13332	ENSG00000105426	protein tyrosine phosphatase, receptor type, S	PTPRS	Expressed in all tissues
dd_Smed_v6_12548_0_1	Q9P1Y6	ENSG00000070047	PHD and ring finger domains 1	PHRF1	Expressed in all tissues
dd_Smed_v6_1255_0_1	P21283	ENSG00000155097	ATPase, H+ transporting, lysosomal 42kDa, V1 subunit C1	ATP6V1C1	Expressed in all tissues
dd_Smed_v6_12551_0_1	P51587	ENSG00000139618	breast cancer 2, early onset	BRCA2	Mixed
dd_Smed_v6_12553_0_1	Q9H6Y2	ENSG00000120314	WD repeat domain 55	WDR55	Expressed in all tissues
dd_Smed_v6_12558_0_1	Q96Q05	ENSG00000167632	trafficking protein particle complex 9	TRAPPC9	Expressed in all tissues
dd_Smed_v6_1256_0_1	Q9P0J0	ENSG00000186010	NADH dehydrogenase (ubiquinone) 1 alpha subcomplex, 13	NDUFA13	Expressed in all tissues
dd_Smed_v6_1257_0_1	O43657	ENSG00000000003	tetraspanin 6	TSPAN6	Mixed
dd_Smed_v6_12570_0_1	Q9NRK6	ENSG00000135776	ATP-binding cassette, sub-family B (MDR/TAP), member 10	ABCB10	Expressed in all tissues
dd_Smed_v6_12575_0_1	Q8TBK2	ENSG00000103037	SET domain containing 6	SETD6	Expressed in all tissues
dd_Smed_v6_1258_0_1	Q96J94	ENSG00000125207	piwi-like RNA-mediated gene silencing 1	PIWIL1	Tissue enriched	testis
dd_Smed_v6_12580_0_1	Q9BVW5	ENSG00000075131	TIMELESS interacting protein	TIPIN	Expressed in all tissues
dd_Smed_v6_12584_0_1	Q15654	ENSG00000087077	thyroid hormone receptor interactor 6	TRIP6	Expressed in all tissues
dd_Smed_v6_12586_0_1	P13994	ENSG00000104957	coiled-coil domain containing 130	CCDC130	Expressed in all tissues
dd_Smed_v6_12588_0_1	Q8IY82	ENSG00000159625	coiled-coil domain containing 135	CCDC135	Group enriched	fallopian tube,testis
dd_Smed_v6_1259_0_1	P04179	ENSG00000112096	superoxide dismutase 2, mitochondrial	SOD2	Expressed in all tissues
dd_Smed_v6_12594_0_1	P34925	ENSG00000163785	receptor-like tyrosine kinase	RYK	Expressed in all tissues
dd_Smed_v6_12598_0_1	Q6PJG9	ENSG00000173621	leucine rich repeat and fibronectin type III domain containing 4	LRFN4	Mixed
dd_Smed_v6_126_0_1	P35544	ENSG00000149806	Finkel-Biskis-Reilly murine sarcoma virus (FBR-MuSV) ubiquitously expressed	FAU	Expressed in all tissues
dd_Smed_v6_1260_0_1	P04818	ENSG00000176890	thymidylate synthetase	TYMS	Mixed
dd_Smed_v6_12602_0_1	Q03431	ENSG00000160801	parathyroid hormone 1 receptor	PTH1R	Tissue enriched	kidney
dd_Smed_v6_12606_0_1	P35523	ENSG00000188037	chloride channel, voltage-sensitive 1	CLCN1	Tissue enriched	skeletal muscle
dd_Smed_v6_12618_0_1	A0AVF1	ENSG00000105948	tetratricopeptide repeat domain 26	TTC26	Tissue enhanced	fallopian tube
dd_Smed_v6_1262_0_1	O00410	ENSG00000065150	importin 5	IPO5	Expressed in all tissues
dd_Smed_v6_12621_0_1	Q9NS40	ENSG00000184611	potassium voltage-gated channel, subfamily H (eag-related), member 7	KCNH7	Group enriched	brain,testis
dd_Smed_v6_12622_0_1	P26572	ENSG00000131446	mannosyl (alpha-1,3-)-glycoprotein beta-1,2-N-acetylglucosaminyltransferase	MGAT1	Expressed in all tissues
dd_Smed_v6_12626_0_1	Q96A29	ENSG00000181830	solute carrier family 35 (GDP-fucose transporter), member C1	SLC35C1	Expressed in all tissues
dd_Smed_v6_12628_0_1	Q9BUY7	ENSG00000140025	EF-hand calcium binding domain 11	EFCAB11	Expressed in all tissues
dd_Smed_v6_1263_0_1	P42025	ENSG00000115073	ARP1 actin-related protein 1 homolog B, centractin beta (yeast)	ACTR1B	Expressed in all tissues
dd_Smed_v6_12634_0_1	P15172	ENSG00000129152	myogenic differentiation 1	MYOD1	Tissue enriched	skeletal muscle
dd_Smed_v6_12637_0_1	O00444	ENSG00000142731	polo-like kinase 4	PLK4	Tissue enhanced	bone marrow, testis
dd_Smed_v6_12638_0_1	P51530	ENSG00000138346	DNA replication helicase/nuclease 2	DNA2	Mixed
dd_Smed_v6_1264_0_1	Q99436	ENSG00000136930	proteasome (prosome, macropain) subunit, beta type, 7	PSMB7	Expressed in all tissues
dd_Smed_v6_12645_0_1	Q8N6M0	ENSG00000155100	OTU domain containing 6B	OTUD6B	Expressed in all tissues
dd_Smed_v6_1265_0_1	Q9UNL2	ENSG00000114850	signal sequence receptor, gamma (translocon-associated protein gamma)	SSR3	Expressed in all tissues
dd_Smed_v6_12653_0_1	Q99259	ENSG00000128683	glutamate decarboxylase 1 (brain, 67kDa)	GAD1	Tissue enriched	brain
dd_Smed_v6_12656_0_1	Q9H2G9	ENSG00000117475	basic leucine zipper nuclear factor 1	BLZF1	Expressed in all tissues
dd_Smed_v6_12657_0_1	Q9Y2B2	ENSG00000108474	phosphatidylinositol glycan anchor biosynthesis, class L	PIGL	Expressed in all tissues
dd_Smed_v6_12659_0_1	Q96DW6	ENSG00000144659	solute carrier family 25, member 38	SLC25A38	Expressed in all tissues
dd_Smed_v6_12668_0_1	Q9NPI0	ENSG00000149483	transmembrane protein 138	TMEM138	Expressed in all tissues
dd_Smed_v6_12674_0_1	Q8N441	ENSG00000127418	fibroblast growth factor receptor-like 1	FGFRL1	Expressed in all tissues
dd_Smed_v6_12677_0_1	Q96SQ7	ENSG00000168874	atonal homolog 8 (Drosophila)	ATOH8	Mixed
dd_Smed_v6_1268_0_1	Q8TEU8	ENSG00000173714	WAP, follistatin/kazal, immunoglobulin, kunitz and netrin domain containing 2	WFIKKN2	Tissue enriched	ovary
dd_Smed_v6_12681_0_1	Q9NR82	ENSG00000185760	potassium voltage-gated channel, KQT-like subfamily, member 5	KCNQ5	Tissue enhanced	brain, skeletal muscle
dd_Smed_v6_12684_0_1	Q8NEN0	ENSG00000118690	armadillo repeat containing 2	ARMC2	Tissue enhanced	testis
dd_Smed_v6_12689_0_1	Q9C098	ENSG00000163673	doublecortin-like kinase 3	DCLK3	Tissue enhanced	testis
dd_Smed_v6_12690_0_1	Q2TB18	ENSG00000034533	asteroid homolog 1 (Drosophila)	ASTE1	Mixed
dd_Smed_v6_12692_0_1	Q53F39	ENSG00000154889	metallophosphoesterase 1	MPPE1	Expressed in all tissues
dd_Smed_v6_12694_0_1	Q8N8R5	ENSG00000178074	chromosome 2 open reading frame 69	C2orf69	Expressed in all tissues
dd_Smed_v6_12699_0_1	P28702	ENSG00000204231	retinoid X receptor, beta	RXRB	Expressed in all tissues
dd_Smed_v6_127_0_1	Q92901	ENSG00000140986	ribosomal protein L3-like	RPL3L	Group enriched	heart muscle,skeletal muscle
dd_Smed_v6_1270_0_1	Q8WUM9	ENSG00000144136	solute carrier family 20 (phosphate transporter), member 1	SLC20A1	Expressed in all tissues
dd_Smed_v6_12702_0_1	Q96LB3	ENSG00000096872	intraflagellar transport 74 homolog (Chlamydomonas)	IFT74	Expressed in all tissues
dd_Smed_v6_12703_0_1	A1A4V9	ENSG00000196118	chromosome 16 open reading frame 93	C16orf93	Mixed
dd_Smed_v6_1271_0_1	Q96CW1	ENSG00000161203	adaptor-related protein complex 2, mu 1 subunit	AP2M1	Expressed in all tissues
dd_Smed_v6_12714_0_1	Q8IX29	ENSG00000214050	F-box protein 16	FBXO16	Mixed
dd_Smed_v6_12722_0_1	Q8NFJ8	ENSG00000180828	basic helix-loop-helix family, member e22	BHLHE22	Tissue enhanced	brain
dd_Smed_v6_12727_0_1	O43462	ENSG00000012174	membrane-bound transcription factor peptidase, site 2	MBTPS2	Expressed in all tissues
dd_Smed_v6_12738_0_1	Q8N461	ENSG00000127585	F-box and leucine-rich repeat protein 16	FBXL16	Group enriched	brain,esophagus
dd_Smed_v6_1274_1_1	O60841	ENSG00000158417	eukaryotic translation initiation factor 5B	EIF5B	Expressed in all tissues
dd_Smed_v6_12742_0_1	Q8WVF1	ENSG00000116885	organic solute carrier partner 1	OSCP1	Tissue enhanced	fallopian tube, testis
dd_Smed_v6_12745_0_1	Q8IZ73	ENSG00000166133	RNA pseudouridylate synthase domain containing 2	RPUSD2	Expressed in all tissues
dd_Smed_v6_12752_0_1	Q4G0U5	ENSG00000163075	Primary ciliary dyskinesia protein 1	PCDP1	Tissue enhanced	fallopian tube, testis
dd_Smed_v6_12753_0_1	P35227	ENSG00000056661	polycomb group ring finger 2	PCGF2	Mixed
dd_Smed_v6_1276_0_1	Q9UMS4	ENSG00000110107	pre-mRNA processing factor 19	PRPF19	Expressed in all tissues
dd_Smed_v6_12762_0_1	B2RC85	ENSG00000169402	radial spoke head 10 homolog B2 (Chlamydomonas)	RSPH10B2	Group enriched	fallopian tube,testis
dd_Smed_v6_12768_0_1	O14512	ENSG00000174111	suppressor of cytokine signaling 7	SOCS7	Tissue enriched	testis
dd_Smed_v6_12774_0_1	Q9UNW9	ENSG00000104967	neuro-oncological ventral antigen 2	NOVA2	Tissue enhanced	brain
dd_Smed_v6_1278_0_1	P25786	ENSG00000129084	proteasome (prosome, macropain) subunit, alpha type, 1	PSMA1	Expressed in all tissues
dd_Smed_v6_12783_0_1	Q9Y2C3	ENSG00000183778	UDP-Gal:betaGlcNAc beta 1,3-galactosyltransferase, polypeptide 5	B3GALT5	Tissue enhanced	colon, duodenum, rectum, small intestine
dd_Smed_v6_12784_0_1	P10599	ENSG00000136810	thioredoxin	TXN	Expressed in all tissues
dd_Smed_v6_1279_0_1	P43686	ENSG00000013275	proteasome (prosome, macropain) 26S subunit, ATPase, 4	PSMC4	Expressed in all tissues
dd_Smed_v6_12799_0_1	Q96EB6	ENSG00000096717	sirtuin 1	SIRT1	Expressed in all tissues
dd_Smed_v6_128_0_1	Q07020	ENSG00000063177	ribosomal protein L18	RPL18	Expressed in all tissues
dd_Smed_v6_1280_0_1	P67775	ENSG00000113575	protein phosphatase 2, catalytic subunit, alpha isozyme	PPP2CA	Expressed in all tissues
dd_Smed_v6_12801_0_1	Q9BRQ4	ENSG00000137691	chromosome 11 open reading frame 70	C11orf70	Group enriched	fallopian tube,testis
dd_Smed_v6_12811_0_1	Q69YW2	ENSG00000203685	chromosome 1 open reading frame 95	C1orf95	Tissue enhanced	brain
dd_Smed_v6_12812_0_1	O75382	ENSG00000110171	tripartite motif containing 3	TRIM3	Expressed in all tissues
dd_Smed_v6_12816_0_1	Q86YS7	ENSG00000111731	C2 calcium-dependent domain containing 5	C2CD5	Expressed in all tissues
dd_Smed_v6_12818_0_1	O43913	ENSG00000164815	origin recognition complex, subunit 5	ORC5	Expressed in all tissues
dd_Smed_v6_1282_0_1	Q16539	ENSG00000112062	mitogen-activated protein kinase 14	MAPK14	Expressed in all tissues
dd_Smed_v6_12821_0_1	Q9UDX3	ENSG00000133488	SEC14-like 4 (S. cerevisiae)	SEC14L4	Group enriched	bone marrow,liver,lung,testis
dd_Smed_v6_12823_0_1	O75794	ENSG00000151465	cell division cycle 123	CDC123	Expressed in all tissues
dd_Smed_v6_12833_0_1	Q86V25	ENSG00000143494	vasohibin 2	VASH2	Mixed
dd_Smed_v6_12835_0_1	Q9P209	ENSG00000112877	centrosomal protein 72kDa	CEP72	Mixed
dd_Smed_v6_12849_0_1	Q96K21	ENSG00000166140	zinc finger, FYVE domain containing 19	ZFYVE19	Expressed in all tissues
dd_Smed_v6_1285_0_1	Q96PK6	ENSG00000239306	RNA binding motif protein 14	RBM14	Expressed in all tissues
dd_Smed_v6_12850_0_1	Q8N954	ENSG00000152133	G patch domain containing 11	GPATCH11	Expressed in all tissues
dd_Smed_v6_12866_0_1	P20020	ENSG00000070961	ATPase, Ca++ transporting, plasma membrane 1	ATP2B1	Expressed in all tissues
dd_Smed_v6_12873_0_1	P78426	ENSG00000163623	NK6 homeobox 1	NKX6-1	Tissue enhanced	esophagus, pancreas
dd_Smed_v6_12879_0_1	Q9P215	ENSG00000143157	pogo transposable element with KRAB domain	POGK	Expressed in all tissues
dd_Smed_v6_1288_0_1	O60583	ENSG00000082258	cyclin T2	CCNT2	Expressed in all tissues
dd_Smed_v6_12881_0_1	Q9BXW9	ENSG00000144554	Fanconi anemia, complementation group D2	FANCD2	Mixed
dd_Smed_v6_12883_0_1	Q9GZV3	ENSG00000115665	solute carrier family 5 (sodium/choline cotransporter), member 7	SLC5A7	Mixed
dd_Smed_v6_1290_0_1	P30044	ENSG00000126432	peroxiredoxin 5	PRDX5	Expressed in all tissues
dd_Smed_v6_12909_0_1	Q9Y5R4	ENSG00000114735	HemK methyltransferase family member 1	HEMK1	Expressed in all tissues
dd_Smed_v6_12915_0_1	Q9BTX3	ENSG00000168701	transmembrane protein 208	TMEM208	Expressed in all tissues
dd_Smed_v6_1293_0_1	Q9BYM8	ENSG00000125826	RanBP-type and C3HC4-type zinc finger containing 1	RBCK1	Expressed in all tissues
dd_Smed_v6_12930_0_1	Q15022	ENSG00000178691	SUZ12 polycomb repressive complex 2 subunit	SUZ12	Expressed in all tissues
dd_Smed_v6_12936_0_1	Q9ULJ7	ENSG00000151458	ankyrin repeat domain 50	ANKRD50	Mixed
dd_Smed_v6_12942_0_1	Q8NBA8	ENSG00000169570	DTW domain containing 2	DTWD2	Mixed
dd_Smed_v6_12946_0_1	O94812	ENSG00000007516	BAI1-associated protein 3	BAIAP3	Tissue enhanced	fallopian tube
dd_Smed_v6_1295_0_1	Q96A49	ENSG00000169895	synapse associated protein 1	SYAP1	Expressed in all tissues
dd_Smed_v6_12956_0_1	P49247	ENSG00000153574	ribose 5-phosphate isomerase A	RPIA	Expressed in all tissues
dd_Smed_v6_12961_0_1	Q12888	ENSG00000067369	tumor protein p53 binding protein 1	TP53BP1	Expressed in all tissues
dd_Smed_v6_12964_0_1	Q13183	ENSG00000007216	solute carrier family 13 (sodium-dependent dicarboxylate transporter), member 2	SLC13A2	Group enriched	duodenum,kidney,salivary gland,small intestine
dd_Smed_v6_12969_0_1	Q9Y592	ENSG00000173588	coiled-coil domain containing 41	CCDC41	Expressed in all tissues
dd_Smed_v6_1297_0_1	P12955	ENSG00000124299	peptidase D	PEPD	Expressed in all tissues
dd_Smed_v6_12977_0_1	Q9Y2J0	ENSG00000089169	rabphilin 3A homolog (mouse)	RPH3A	Tissue enriched	brain
dd_Smed_v6_12981_0_1	P16260	ENSG00000122912	solute carrier family 25 (mitochondrial carrier; Graves disease autoantigen), member 16	SLC25A16	Expressed in all tissues
dd_Smed_v6_12984_0_1	O75648	ENSG00000100416	tRNA 5-methylaminomethyl-2-thiouridylate methyltransferase	TRMU	Expressed in all tissues
dd_Smed_v6_12986_0_1	Q7RTM1	ENSG00000163982	otopetrin 1	OTOP1	Not detected
dd_Smed_v6_12987_0_1	P49366	ENSG00000095059	deoxyhypusine synthase	DHPS	Expressed in all tissues
dd_Smed_v6_1299_0_1	P04035	ENSG00000113161	3-hydroxy-3-methylglutaryl-CoA reductase	HMGCR	Expressed in all tissues
dd_Smed_v6_12996_0_1	Q01082	ENSG00000115306	spectrin, beta, non-erythrocytic 1	SPTBN1	Expressed in all tissues
dd_Smed_v6_130_0_1	P27635	ENSG00000147403	ribosomal protein L10	RPL10	Expressed in all tissues
dd_Smed_v6_13002_0_1	Q9BQG2	ENSG00000112874	nudix (nucleoside diphosphate linked moiety X)-type motif 12	NUDT12	Mixed
dd_Smed_v6_13010_0_1	P78424	ENSG00000106536	POU class 6 homeobox 2	POU6F2	Tissue enhanced	brain, pancreas
dd_Smed_v6_13019_0_1	Q4AC94	ENSG00000168014	C2 calcium-dependent domain containing 3	C2CD3	Expressed in all tissues
dd_Smed_v6_13034_0_1	Q9BZE2	ENSG00000110060	pseudouridylate synthase 3	PUS3	Expressed in all tissues
dd_Smed_v6_1304_0_1	P12081	ENSG00000170445	histidyl-tRNA synthetase	HARS	Expressed in all tissues
dd_Smed_v6_1305_0_1	Q8N6L1	ENSG00000163463	keratinocyte associated protein 2	KRTCAP2	Expressed in all tissues
dd_Smed_v6_13054_0_1	P28340	ENSG00000062822	polymerase (DNA directed), delta 1, catalytic subunit	POLD1	Expressed in all tissues
dd_Smed_v6_13062_0_1	Q8WTT2	ENSG00000173145	nucleolar complex associated 3 homolog (S. cerevisiae)	NOC3L	Expressed in all tissues
dd_Smed_v6_13063_0_1	Q96PU8	ENSG00000112531	QKI, KH domain containing, RNA binding	QKI	Expressed in all tissues
dd_Smed_v6_13064_0_1	Q7Z5J8	ENSG00000151687	ankyrin and armadillo repeat containing	ANKAR	Expressed in all tissues
dd_Smed_v6_1307_0_1	Q99470	ENSG00000132581	stromal cell-derived factor 2	SDF2	Expressed in all tissues
dd_Smed_v6_13087_0_1	P00156	ENSG00000198727	mitochondrially encoded cytochrome b	MT-CYB	Expressed in all tissues
dd_Smed_v6_1309_0_1	Q969T9	ENSG00000132471	WW domain binding protein 2	WBP2	Expressed in all tissues
dd_Smed_v6_13092_0_1	A5PLN7	ENSG00000109794	family with sequence similarity 149, member A	FAM149A	Mixed
dd_Smed_v6_1310_0_1	P08559	ENSG00000131828	pyruvate dehydrogenase (lipoamide) alpha 1	PDHA1	Expressed in all tissues
dd_Smed_v6_1310_1_1	O96006	ENSG00000214717	zinc finger, BED-type containing 1	ZBED1	Expressed in all tissues
dd_Smed_v6_13102_0_1	Q86WQ0	ENSG00000184162	nuclear receptor 2C2-associated protein	NR2C2AP	Expressed in all tissues
dd_Smed_v6_13113_0_1	Q5TCY1	ENSG00000146216	tau tubulin kinase 1	TTBK1	Tissue enhanced	brain
dd_Smed_v6_13116_0_1	Q8NDL9	ENSG00000084693	ATP/GTP binding protein-like 5	AGBL5	Tissue enriched	testis
dd_Smed_v6_13117_0_1	Q86VV8	ENSG00000176225	rotatin	RTTN	Expressed in all tissues
dd_Smed_v6_13130_0_1	Q8ND61	ENSG00000131379	chromosome 3 open reading frame 20	C3orf20	Tissue enriched	testis
dd_Smed_v6_13140_0_1	Q9BWT6	ENSG00000121211	meiotic nuclear divisions 1 homolog (S. cerevisiae)	MND1	Mixed
dd_Smed_v6_13148_0_1	Q05DH4	ENSG00000164142	family with sequence similarity 160, member A1	FAM160A1	Mixed
dd_Smed_v6_1315_0_1	P38117	ENSG00000105379	electron-transfer-flavoprotein, beta polypeptide	ETFB	Expressed in all tissues
dd_Smed_v6_13154_0_1	A6NEN9	ENSG00000204165	chromosome X open reading frame 65	CXorf65	Tissue enhanced	testis
dd_Smed_v6_1316_0_1	P60604	ENSG00000184787	ubiquitin-conjugating enzyme E2G 2	UBE2G2	Expressed in all tissues
dd_Smed_v6_13161_0_1	Q9Y547	ENSG00000081870	heat shock protein family B (small), member 11	HSPB11	Expressed in all tissues
dd_Smed_v6_13164_0_1	Q15392	ENSG00000116133	24-dehydrocholesterol reductase	DHCR24	Expressed in all tissues
dd_Smed_v6_13167_0_1	Q9Y672	ENSG00000088035	ALG6, alpha-1,3-glucosyltransferase	ALG6	Expressed in all tissues
dd_Smed_v6_13168_0_1	Q9H3S5	ENSG00000143315	phosphatidylinositol glycan anchor biosynthesis, class M	PIGM	Mixed
dd_Smed_v6_13184_0_1	Q8N3J3	ENSG00000125319	chromosome 17 open reading frame 53	C17orf53	Tissue enhanced	bone marrow, testis
dd_Smed_v6_13185_0_1	Q8TBF8	ENSG00000157470	family with sequence similarity 81, member A	FAM81A	Tissue enhanced	brain
dd_Smed_v6_13189_0_1	Q14714	ENSG00000123096	sarcospan	SSPN	Mixed
dd_Smed_v6_1322_0_1	Q15691	ENSG00000101367	microtubule-associated protein, RP/EB family, member 1	MAPRE1	Expressed in all tissues
dd_Smed_v6_13235_0_1	Q5TH74	ENSG00000001460	sperm-tail PG-rich repeat containing 1	STPG1	Tissue enhanced	testis
dd_Smed_v6_1324_0_1	P60510	ENSG00000149923	protein phosphatase 4, catalytic subunit	PPP4C	Expressed in all tissues
dd_Smed_v6_13246_0_1	Q8WVB6	ENSG00000127586	CTF18, chromosome transmission fidelity factor 18 homolog (S. cerevisiae)	CHTF18	Expressed in all tissues
dd_Smed_v6_13248_0_1	Q8IV35	ENSG00000174776	WD repeat domain 49	WDR49	Tissue enhanced	fallopian tube
dd_Smed_v6_13258_0_1	Q5T6F0	ENSG00000198876	DDB1 and CUL4 associated factor 12	DCAF12	Expressed in all tissues
dd_Smed_v6_1326_0_1	Q9BYT1	ENSG00000101194	solute carrier family 17 (vesicular nucleotide transporter), member 9	SLC17A9	Mixed
dd_Smed_v6_13269_0_1	O60934	ENSG00000104320	nibrin	NBN	Expressed in all tissues
dd_Smed_v6_1327_0_1	P14866	ENSG00000104824	heterogeneous nuclear ribonucleoprotein L	HNRNPL	Expressed in all tissues
dd_Smed_v6_13271_0_1	Q5XX13	ENSG00000171931	F-box and WD repeat domain containing 10	FBXW10	Tissue enriched	testis
dd_Smed_v6_13281_0_1	Q16602	ENSG00000064989	calcitonin receptor-like	CALCRL	Mixed
dd_Smed_v6_13283_0_1	Q9Y5R5	ENSG00000173253	doublesex and mab-3 related transcription factor 2	DMRT2	Tissue enhanced	kidney
dd_Smed_v6_13289_0_1	Q96M11	ENSG00000198331	hydrolethalus syndrome 1	HYLS1	Tissue enhanced	testis
dd_Smed_v6_13290_0_1	Q8TDG4	ENSG00000163312	helicase, POLQ-like	HELQ	Expressed in all tissues
dd_Smed_v6_13295_0_1	Q15878	ENSG00000198216	calcium channel, voltage-dependent, R type, alpha 1E subunit	CACNA1E	Tissue enriched	brain
dd_Smed_v6_13298_0_1	Q9Y4C2	ENSG00000198420	family with sequence similarity 115, member A	FAM115A	Expressed in all tissues
dd_Smed_v6_13304_0_1	O76083	ENSG00000160191	phosphodiesterase 9A	PDE9A	Mixed
dd_Smed_v6_13306_0_1	Q8NCG7	ENSG00000164535	diacylglycerol lipase, beta	DAGLB	Expressed in all tissues
dd_Smed_v6_13307_0_1	Q7L8W6	ENSG00000134146	diphthamine biosynthesis 6	DPH6	Expressed in all tissues
dd_Smed_v6_1331_0_1	P26583	ENSG00000164104	high mobility group box 2	HMGB2	Expressed in all tissues
dd_Smed_v6_13311_0_1	Q9P0K9	ENSG00000260230	ferric-chelate reductase 1-like	FRRS1L	Group enriched	adrenal gland,brain,ovary
dd_Smed_v6_13316_0_1	Q76NI1	ENSG00000171798	kinase non-catalytic C-lobe domain (KIND) containing 1	KNDC1	Tissue enhanced	brain, fallopian tube
dd_Smed_v6_13318_0_1	Q9P0N5	ENSG00000187049	transmembrane protein 216	TMEM216	Expressed in all tissues
dd_Smed_v6_13324_0_1	Q9H598	ENSG00000101438	solute carrier family 32 (GABA vesicular transporter), member 1	SLC32A1	Tissue enriched	brain
dd_Smed_v6_13327_0_1	Q9P0L9	ENSG00000107593	polycystic kidney disease 2-like 1	PKD2L1	Tissue enhanced	spleen
dd_Smed_v6_13332_0_1	P49190	ENSG00000144407	parathyroid hormone 2 receptor	PTH2R	Tissue enriched	kidney
dd_Smed_v6_13334_0_1	Q9NZK7	ENSG00000188784	phospholipase A2, group IIE	PLA2G2E	Not detected
dd_Smed_v6_13335_0_1	Q05D60	ENSG00000165325	coiled-coil domain containing 67	CCDC67	Group enriched	fallopian tube,testis
dd_Smed_v6_13339_0_1	O75665	ENSG00000046651	oral-facial-digital syndrome 1	OFD1	Expressed in all tissues
dd_Smed_v6_1334_0_1	O95861	ENSG00000162813	3'(2'), 5'-bisphosphate nucleotidase 1	BPNT1	Expressed in all tissues
dd_Smed_v6_13341_0_1	Q9H165	ENSG00000119866	B-cell CLL/lymphoma 11A (zinc finger protein)	BCL11A	Mixed
dd_Smed_v6_13345_0_1	Q9H9F9	ENSG00000101442	ARP5 actin-related protein 5 homolog (yeast)	ACTR5	Expressed in all tissues
dd_Smed_v6_13347_0_1	Q71DI3	ENSG00000183598	histone cluster 2, H3d	HIST2H3D	Mixed
dd_Smed_v6_13347_0_1	Q71DI3	ENSG00000203811	histone cluster 2, H3c	HIST2H3C	Not detected
dd_Smed_v6_13347_0_1	Q71DI3	ENSG00000203852	histone cluster 2, H3a	HIST2H3A	Not detected
dd_Smed_v6_1335_0_1	O43633	ENSG00000130724	charged multivesicular body protein 2A	CHMP2A	Expressed in all tissues
dd_Smed_v6_13351_0_1	Q8TAD8	ENSG00000163877	Smad nuclear interacting protein 1	SNIP1	Expressed in all tissues
dd_Smed_v6_13366_0_1	Q96LT9	ENSG00000185946	RNA-binding region (RNP1, RRM) containing 3	RNPC3	Expressed in all tissues
dd_Smed_v6_1337_0_1	P63208	ENSG00000113558	S-phase kinase-associated protein 1	SKP1	Expressed in all tissues
dd_Smed_v6_13377_0_1	O75052	ENSG00000198929	nitric oxide synthase 1 (neuronal) adaptor protein	NOS1AP	Tissue enhanced	brain
dd_Smed_v6_13386_0_1	Q5SY16	ENSG00000162408	nucleolar protein 9	NOL9	Expressed in all tissues
dd_Smed_v6_1339_0_1	P05091	ENSG00000111275	aldehyde dehydrogenase 2 family (mitochondrial)	ALDH2	Expressed in all tissues
dd_Smed_v6_13408_0_1	Q9Y3Q4	ENSG00000138622	hyperpolarization activated cyclic nucleotide-gated potassium channel 4	HCN4	Tissue enhanced	heart muscle, testis
dd_Smed_v6_1341_0_1	Q9Y421	ENSG00000105058	family with sequence similarity 32, member A	FAM32A	Expressed in all tissues
dd_Smed_v6_13411_0_1	P54098	ENSG00000140521	polymerase (DNA directed), gamma	POLG	Expressed in all tissues
dd_Smed_v6_13415_0_1	O95415	ENSG00000164713	brain protein I3	BRI3	Expressed in all tissues
dd_Smed_v6_1342_0_1	O43396	ENSG00000091164	thioredoxin-like 1	TXNL1	Expressed in all tissues
dd_Smed_v6_13420_0_1	Q8N9R8	ENSG00000173611	suppressor of cancer cell invasion	SCAI	Mixed
dd_Smed_v6_13421_0_1	Q9Y4F4	ENSG00000198718	family with sequence similarity 179, member B	FAM179B	Expressed in all tissues
dd_Smed_v6_13424_0_1	Q9P2E2	ENSG00000117245	kinesin family member 17	KIF17	Tissue enhanced	spleen, testis
dd_Smed_v6_1343_0_1	Q9BXJ9	ENSG00000164134	N(alpha)-acetyltransferase 15, NatA auxiliary subunit	NAA15	Expressed in all tissues
dd_Smed_v6_13432_0_1	Q9H6L2	ENSG00000205084	transmembrane protein 231	TMEM231	Tissue enriched	fallopian tube
dd_Smed_v6_1344_0_1	Q9Y3D2	ENSG00000148450	methionine sulfoxide reductase B2	MSRB2	Expressed in all tissues
dd_Smed_v6_13444_0_1	Q8WXW3	ENSG00000083535	progesterone immunomodulatory binding factor 1	PIBF1	Expressed in all tissues
dd_Smed_v6_13446_0_1	Q9P2R3	ENSG00000185722	ankyrin repeat and FYVE domain containing 1	ANKFY1	Expressed in all tissues
dd_Smed_v6_1345_0_1	Q969S3	ENSG00000173545	zinc finger protein 622	ZNF622	Expressed in all tissues
dd_Smed_v6_13450_0_1	Q5U5Z8	ENSG00000165923	ATP/GTP binding protein-like 2	AGBL2	Tissue enhanced	fallopian tube, testis
dd_Smed_v6_13474_0_1	Q99856	ENSG00000116017	AT rich interactive domain 3A (BRIGHT-like)	ARID3A	Tissue enhanced	placenta
dd_Smed_v6_13486_0_1	Q8N488	ENSG00000163602	RING1 and YY1 binding protein	RYBP	Expressed in all tissues
dd_Smed_v6_13487_0_1	P09544	ENSG00000105989	wingless-type MMTV integration site family member 2	WNT2	Group enriched	endometrium,placenta
dd_Smed_v6_13492_0_1	Q8IU60	ENSG00000172795	decapping mRNA 2	DCP2	Expressed in all tissues
dd_Smed_v6_13504_0_1	O43439	ENSG00000078699	core-binding factor, runt domain, alpha subunit 2; translocated to, 2	CBFA2T2	Expressed in all tissues
dd_Smed_v6_1351_0_1	P42785	ENSG00000137509	prolylcarboxypeptidase (angiotensinase C)	PRCP	Expressed in all tissues
dd_Smed_v6_13511_0_1	Q9BRP8	ENSG00000170473	within bgcn homolog (Drosophila)	WIBG	Expressed in all tissues
dd_Smed_v6_13513_0_1	Q8NAT1	ENSG00000144647	protein O-linked mannose N-acetylglucosaminyltransferase 2 (beta 1,4-)	POMGNT2	Expressed in all tissues
dd_Smed_v6_13517_0_1	Q9BUZ4	ENSG00000076604	TNF receptor-associated factor 4	TRAF4	Mixed
dd_Smed_v6_13519_0_1	Q6P2D8	ENSG00000166435	X-ray radiation resistance associated 1	XRRA1	Expressed in all tissues
dd_Smed_v6_13525_0_1	Q1ZZU3	ENSG00000175854	SWI5 recombination repair homolog (yeast)	SWI5	Expressed in all tissues
dd_Smed_v6_13526_0_1	Q96FX2	ENSG00000154813	diphthamide biosynthesis 3	DPH3	Expressed in all tissues
dd_Smed_v6_1353_0_1	Q99543	ENSG00000105821	DnaJ (Hsp40) homolog, subfamily C, member 2	DNAJC2	Expressed in all tissues
dd_Smed_v6_13535_0_1	Q9Y6E7	ENSG00000089163	sirtuin 4	SIRT4	Mixed
dd_Smed_v6_13540_0_1	Q96S79	ENSG00000141150	RAS-like, family 10, member B	RASL10B	Tissue enhanced	adipose tissue, skeletal muscle
dd_Smed_v6_1355_1_1	Q5T3I0	ENSG00000160818	G patch domain containing 4	GPATCH4	Expressed in all tissues
dd_Smed_v6_13562_0_1	Q2KJY2	ENSG00000162849	kinesin family member 26B	KIF26B	Mixed
dd_Smed_v6_1357_0_1	Q6NXE6	ENSG00000105676	armadillo repeat containing 6	ARMC6	Expressed in all tissues
dd_Smed_v6_13573_0_1	Q6PCD5	ENSG00000168411	ring finger and WD repeat domain 3	RFWD3	Mixed
dd_Smed_v6_1358_0_1	Q9GZQ3	ENSG00000170619	COMM domain containing 5	COMMD5	Expressed in all tissues
dd_Smed_v6_1359_0_1	P41223	ENSG00000106245	BUD31 homolog (S. cerevisiae)	BUD31	Expressed in all tissues
dd_Smed_v6_13591_0_1	Q8NCR3	ENSG00000166323	chromosome 11 open reading frame 65	C11orf65	Tissue enriched	testis
dd_Smed_v6_13592_0_1	P14324	ENSG00000160752	farnesyl diphosphate synthase	FDPS	Expressed in all tissues
dd_Smed_v6_136_0_1	P13693	ENSG00000133112	tumor protein, translationally-controlled 1	TPT1	Expressed in all tissues
dd_Smed_v6_13600_0_1	Q6ZT98	ENSG00000137941	tubulin tyrosine ligase-like family, member 7	TTLL7	Tissue enhanced	brain
dd_Smed_v6_13605_0_1	Q3SXZ7	ENSG00000131044	tubulin tyrosine ligase-like family, member 9	TTLL9	Group enriched	fallopian tube,testis
dd_Smed_v6_13608_0_1	Q96FG2	ENSG00000115459	ELMO/CED-12 domain containing 3	ELMOD3	Expressed in all tissues
dd_Smed_v6_13609_0_1	Q9HCI6	ENSG00000168116	KIAA1586	KIAA1586	Expressed in all tissues
dd_Smed_v6_13619_0_1	Q8IVE3	ENSG00000152527	pleckstrin homology domain containing, family H (with MyTH4 domain) member 2	PLEKHH2	Mixed
dd_Smed_v6_13629_0_1	Q8N9V6	ENSG00000144031	ankyrin repeat domain 53	ANKRD53	Tissue enhanced	testis
dd_Smed_v6_1364_0_1	Q9UHD9	ENSG00000188021	ubiquilin 2	UBQLN2	Expressed in all tissues
dd_Smed_v6_13647_0_1	Q70HW3	ENSG00000144741	solute carrier family 25 (S-adenosylmethionine carrier), member 26	SLC25A26	Expressed in all tissues
dd_Smed_v6_1365_0_1	P20645	ENSG00000003056	mannose-6-phosphate receptor (cation dependent)	M6PR	Expressed in all tissues
dd_Smed_v6_13650_0_1	Q9Y5Q9	ENSG00000119041	general transcription factor IIIC, polypeptide 3, 102kDa	GTF3C3	Expressed in all tissues
dd_Smed_v6_1366_0_1	O95747	ENSG00000172939	oxidative stress responsive 1	OXSR1	Expressed in all tissues
dd_Smed_v6_13660_0_1	Q96EY9	ENSG00000213638	adenosine deaminase, tRNA-specific 3	ADAT3	Mixed
dd_Smed_v6_13670_0_1	Q9HC77	ENSG00000151849	centromere protein J	CENPJ	Mixed
dd_Smed_v6_1368_0_1	Q9UHV9	ENSG00000143256	prefoldin subunit 2	PFDN2	Expressed in all tissues
dd_Smed_v6_13687_0_1	Q5T5P2	ENSG00000120549	KIAA1217	KIAA1217	Mixed
dd_Smed_v6_1369_0_1	P36543	ENSG00000131100	ATPase, H+ transporting, lysosomal 31kDa, V1 subunit E1	ATP6V1E1	Expressed in all tissues
dd_Smed_v6_13697_0_1	Q9ULB1	ENSG00000179915	neurexin 1	NRXN1	Tissue enriched	brain
dd_Smed_v6_13699_0_1	Q68D86	ENSG00000150636	coiled-coil domain containing 102B	CCDC102B	Mixed
dd_Smed_v6_1370_0_1	P35637	ENSG00000089280	fused in sarcoma	FUS	Expressed in all tissues
dd_Smed_v6_13700_0_1	P46013	ENSG00000148773	marker of proliferation Ki-67	MKI67	Tissue enhanced	bone marrow
dd_Smed_v6_13704_0_1	Q7RTS3	ENSG00000168267	pancreas specific transcription factor, 1a	PTF1A	Tissue enriched	pancreas
dd_Smed_v6_13710_0_1	Q92953	ENSG00000182674	potassium voltage-gated channel, Shab-related subfamily, member 2	KCNB2	Tissue enhanced	brain, spleen
dd_Smed_v6_13711_0_1	Q8NCE0	ENSG00000154743	TSEN2 tRNA splicing endonuclease subunit	TSEN2	Expressed in all tissues
dd_Smed_v6_13713_0_1	Q9BRR3	ENSG00000165152	transmembrane protein 246	TMEM246	Mixed
dd_Smed_v6_1372_1_1	Q9Y2Q0	ENSG00000124406	ATPase, aminophospholipid transporter (APLT), class I, type 8A, member 1	ATP8A1	Expressed in all tissues
dd_Smed_v6_1373_1_1	Q8WUM4	ENSG00000170248	programmed cell death 6 interacting protein	PDCD6IP	Expressed in all tissues
dd_Smed_v6_13739_0_1	Q96MH6	ENSG00000167904	transmembrane protein 68	TMEM68	Expressed in all tissues
dd_Smed_v6_13740_0_1	Q9C0I9	ENSG00000148814	leucine rich repeat containing 27	LRRC27	Expressed in all tissues
dd_Smed_v6_13749_0_1	A2A3K4	ENSG00000158079	protein tyrosine phosphatase domain containing 1	PTPDC1	Mixed
dd_Smed_v6_1375_0_1	P08240	ENSG00000182934	signal recognition particle receptor (docking protein)	SRPR	Expressed in all tissues
dd_Smed_v6_13756_0_1	Q9BVG8	ENSG00000140859	kinesin family member C3	KIFC3	Expressed in all tissues
dd_Smed_v6_13757_0_1	Q9NS56	ENSG00000197579	topoisomerase I binding, arginine/serine-rich, E3 ubiquitin protein ligase	TOPORS	Expressed in all tissues
dd_Smed_v6_13763_0_1	A6NNL5	ENSG00000189227	chromosome 15 open reading frame 61	C15orf61	Expressed in all tissues
dd_Smed_v6_13767_0_1	Q9UPZ9	ENSG00000112144	intestinal cell (MAK-like) kinase	ICK	Expressed in all tissues
dd_Smed_v6_1377_0_1	P24752	ENSG00000075239	acetyl-CoA acetyltransferase 1	ACAT1	Expressed in all tissues
dd_Smed_v6_13777_0_1	Q8IZ13	ENSG00000221886	chromosome 5 open reading frame 54	C5orf54	Mixed
dd_Smed_v6_13781_0_1	O43763	ENSG00000115297	T-cell leukemia homeobox 2	TLX2	Tissue enhanced	adrenal gland, duodenum
dd_Smed_v6_13788_0_1	Q15078	ENSG00000176749	cyclin-dependent kinase 5, regulatory subunit 1 (p35)	CDK5R1	Tissue enhanced	brain
dd_Smed_v6_1381_0_1	Q9Y6I7	ENSG00000109046	WD repeat and SOCS box containing 1	WSB1	Expressed in all tissues
dd_Smed_v6_13812_0_1	O75912	ENSG00000157680	diacylglycerol kinase, iota	DGKI	Tissue enhanced	thyroid gland
dd_Smed_v6_13822_0_1	Q8NHH1	ENSG00000175764	tubulin tyrosine ligase-like family, member 11	TTLL11	Expressed in all tissues
dd_Smed_v6_13826_0_1	Q6ZQW0	ENSG00000188676	indoleamine 2,3-dioxygenase 2	IDO2	Group enriched	liver,placenta
dd_Smed_v6_13830_0_1	Q9NVD3	ENSG00000185917	SET domain containing 4	SETD4	Expressed in all tissues
dd_Smed_v6_13835_0_1	Q9NX52	ENSG00000158315	rhomboid, veinlet-like 2 (Drosophila)	RHBDL2	Mixed
dd_Smed_v6_13837_0_1	Q7Z4G4	ENSG00000066651	tRNA methyltransferase 11 homolog (S. cerevisiae)	TRMT11	Expressed in all tissues
dd_Smed_v6_1384_0_1	O14561	ENSG00000004779	NADH dehydrogenase (ubiquinone) 1, alpha/beta subcomplex, 1, 8kDa	NDUFAB1	Expressed in all tissues
dd_Smed_v6_13845_0_1	Q68CL5	ENSG00000134779	tubulin polyglutamylase complex subunit 2	TPGS2	Expressed in all tissues
dd_Smed_v6_13854_0_1	P29372	ENSG00000103152	N-methylpurine-DNA glycosylase	MPG	Expressed in all tissues
dd_Smed_v6_1387_0_1	Q9Y371	ENSG00000097033	SH3-domain GRB2-like endophilin B1	SH3GLB1	Expressed in all tissues
dd_Smed_v6_13871_0_1	Q86XK3	ENSG00000156384	SWI5-dependent recombination repair 1	SFR1	Expressed in all tissues
dd_Smed_v6_13879_0_1	Q9BSH5	ENSG00000119431	haloacid dehalogenase-like hydrolase domain containing 3	HDHD3	Expressed in all tissues
dd_Smed_v6_1389_0_1	Q969V3	ENSG00000125912	nicalin	NCLN	Expressed in all tissues
dd_Smed_v6_13891_0_1	Q96BT7	ENSG00000137760	alkB, alkylation repair homolog 8 (E. coli)	ALKBH8	Expressed in all tissues
dd_Smed_v6_13895_0_1	Q9BQ83	ENSG00000132207	SLX1 structure-specific endonuclease subunit homolog A (S. cerevisiae)	SLX1A	Expressed in all tissues
dd_Smed_v6_13895_0_1	Q9BQ83	ENSG00000181625	SLX1 structure-specific endonuclease subunit homolog B (S. cerevisiae)	SLX1B	Expressed in all tissues
dd_Smed_v6_13896_0_1	O43824	ENSG00000178605	GTP binding protein 6 (putative)	GTPBP6	Expressed in all tissues
dd_Smed_v6_139_0_1	P62263	ENSG00000164587	ribosomal protein S14	RPS14	Expressed in all tissues
dd_Smed_v6_1390_0_1	Q9UHD1	ENSG00000110172	cysteine and histidine-rich domain (CHORD) containing 1	CHORDC1	Expressed in all tissues
dd_Smed_v6_13906_1_1	Q9GZT4	ENSG00000167720	serine racemase	SRR	Expressed in all tissues
dd_Smed_v6_1391_0_1	Q9Y5K8	ENSG00000100554	ATPase, H+ transporting, lysosomal 34kDa, V1 subunit D	ATP6V1D	Expressed in all tissues
dd_Smed_v6_13922_0_1	Q9P203	ENSG00000011114	BTB (POZ) domain containing 7	BTBD7	Expressed in all tissues
dd_Smed_v6_13944_0_1	Q15468	ENSG00000123473	SCL/TAL1 interrupting locus	STIL	Mixed
dd_Smed_v6_13946_0_1	O15417	ENSG00000182095	trinucleotide repeat containing 18	TNRC18	Expressed in all tissues
dd_Smed_v6_13953_0_1	P39210	ENSG00000115204	MpV17 mitochondrial inner membrane protein	MPV17	Expressed in all tissues
dd_Smed_v6_13963_0_1	Q96FK6	ENSG00000140006	WD repeat domain 89	WDR89	Expressed in all tissues
dd_Smed_v6_13967_0_1	Q9P109	ENSG00000176928	glucosaminyl (N-acetyl) transferase 4, core 2	GCNT4	Tissue enhanced	duodenum, small intestine, stomach
dd_Smed_v6_1397_0_1	O95218	ENSG00000132485	zinc finger, RAN-binding domain containing 2	ZRANB2	Expressed in all tissues
dd_Smed_v6_13972_0_1	O95235	ENSG00000112984	kinesin family member 20A	KIF20A	Mixed
dd_Smed_v6_13973_0_1	Q15858	ENSG00000169432	sodium channel, voltage-gated, type IX, alpha subunit	SCN9A	Mixed
dd_Smed_v6_13976_0_1	Q9UPN4	ENSG00000141577	5-azacytidine induced 1	AZI1	Mixed
dd_Smed_v6_1398_1_1	P06744	ENSG00000105220	glucose-6-phosphate isomerase	GPI	Expressed in all tissues
dd_Smed_v6_13981_0_1	Q5I7T1	ENSG00000175548	ALG10B, alpha-1,2-glucosyltransferase	ALG10B	Mixed
dd_Smed_v6_13985_0_1	Q8N474	ENSG00000104332	secreted frizzled-related protein 1	SFRP1	Mixed
dd_Smed_v6_13991_0_1	P24385	ENSG00000110092	cyclin D1	CCND1	Mixed
dd_Smed_v6_13998_0_1	O94868	ENSG00000137478	FCH and double SH3 domains 2	FCHSD2	Expressed in all tissues
dd_Smed_v6_140_0_1	P61513	ENSG00000197756	ribosomal protein L37a	RPL37A	Expressed in all tissues
dd_Smed_v6_14004_0_1	Q7Z3E2	ENSG00000165813	chromosome 10 open reading frame 118	C10orf118	Expressed in all tissues
dd_Smed_v6_14010_0_1	Q96J87	ENSG00000140488	CUGBP, Elav-like family member 6	CELF6	Mixed
dd_Smed_v6_14010_0_1	Q96J87	ENSG00000273025	CUGBP Elav-like family member 6	CELF6	Not detected
dd_Smed_v6_1402_0_1	P60174	ENSG00000111669	triosephosphate isomerase 1	TPI1	Expressed in all tissues
dd_Smed_v6_14024_0_1	Q9P2S5	ENSG00000116213	WD repeat containing, antisense to TP73	WRAP73	Expressed in all tissues
dd_Smed_v6_14029_0_1	Q8NEM0	ENSG00000147316	microcephalin 1	MCPH1	Expressed in all tissues
dd_Smed_v6_14031_0_1	Q9UGU0	ENSG00000100207	transcription factor 20 (AR1)	TCF20	Expressed in all tissues
dd_Smed_v6_14037_0_1	Q6P1X6	ENSG00000213563	chromosome 8 open reading frame 82	C8orf82	Expressed in all tissues
dd_Smed_v6_14038_0_1	O94827	ENSG00000171680	pleckstrin homology domain containing, family G (with RhoGef domain) member 5	PLEKHG5	Tissue enhanced	skin
dd_Smed_v6_1405_0_1	Q8WWY3	ENSG00000105618	pre-mRNA processing factor 31	PRPF31	Expressed in all tissues
dd_Smed_v6_14053_0_1	Q9NXB0	ENSG00000011143	Meckel syndrome, type 1	MKS1	Expressed in all tissues
dd_Smed_v6_14055_0_1	P53370	ENSG00000170917	nudix (nucleoside diphosphate linked moiety X)-type motif 6	NUDT6	Mixed
dd_Smed_v6_14057_0_1	Q969W1	ENSG00000171307	zinc finger, DHHC-type containing 16	ZDHHC16	Expressed in all tissues
dd_Smed_v6_14064_0_1	P11388	ENSG00000131747	topoisomerase (DNA) II alpha 170kDa	TOP2A	Tissue enhanced	testis
dd_Smed_v6_14065_0_1	Q9Y6R9	ENSG00000104983	coiled-coil domain containing 61	CCDC61	Expressed in all tissues
dd_Smed_v6_1407_0_1	P62136	ENSG00000172531	protein phosphatase 1, catalytic subunit, alpha isozyme	PPP1CA	Expressed in all tissues
dd_Smed_v6_14090_0_1	Q6NW40	ENSG00000174136	repulsive guidance molecule family member b	RGMB	Mixed
dd_Smed_v6_14097_0_1	Q9BV99	ENSG00000127399	leucine rich repeat containing 61	LRRC61	Expressed in all tissues
dd_Smed_v6_14099_0_1	Q8NEG5	ENSG00000163012	zinc finger, SWIM-type containing 2	ZSWIM2	Tissue enriched	testis
dd_Smed_v6_141_0_1	P10809	ENSG00000144381	heat shock 60kDa protein 1 (chaperonin)	HSPD1	Expressed in all tissues
dd_Smed_v6_14103_0_1	Q8IYW2	ENSG00000171811	tetratricopeptide repeat domain 40	TTC40	Tissue enhanced	skeletal muscle, testis
dd_Smed_v6_1411_0_1	P42765	ENSG00000167315	acetyl-CoA acyltransferase 2	ACAA2	Expressed in all tissues
dd_Smed_v6_14117_0_1	Q9Y5H5	ENSG00000204961	protocadherin alpha 9	PCDHA9	Not detected
dd_Smed_v6_14121_0_1	Q99638	ENSG00000172613	RAD9 homolog A (S. pombe)	RAD9A	Expressed in all tissues
dd_Smed_v6_14131_0_1	Q8IW40	ENSG00000167131	coiled-coil domain containing 103	CCDC103	Group enriched	fallopian tube,testis
dd_Smed_v6_14139_0_1	O60507	ENSG00000169902	tyrosylprotein sulfotransferase 1	TPST1	Expressed in all tissues
dd_Smed_v6_14141_0_1	Q6TCH4	ENSG00000160781	progestin and adipoQ receptor family member VI	PAQR6	Tissue enriched	brain
dd_Smed_v6_14158_0_1	Q86UA6	ENSG00000129197	RPA interacting protein	RPAIN	Expressed in all tissues
dd_Smed_v6_1416_0_1	Q9BXY0	ENSG00000198042	MAK16 homolog (S. cerevisiae)	MAK16	Expressed in all tissues
dd_Smed_v6_14165_0_1	Q6IMN6	ENSG00000110888	caprin family member 2	CAPRIN2	Expressed in all tissues
dd_Smed_v6_1417_0_1	O43852	ENSG00000128595	calumenin	CALU	Expressed in all tissues
dd_Smed_v6_14173_0_1	Q8N695	ENSG00000256870	solute carrier family 5 (sodium/monocarboxylate cotransporter), member 8	SLC5A8	Tissue enriched	thyroid gland
dd_Smed_v6_14189_0_1	O43933	ENSG00000127980	peroxisomal biogenesis factor 1	PEX1	Expressed in all tissues
dd_Smed_v6_14192_0_1	O14593	ENSG00000064490	regulatory factor X-associated ankyrin-containing protein	RFXANK	Expressed in all tissues
dd_Smed_v6_1420_0_1	Q9BRS8	ENSG00000166173	La ribonucleoprotein domain family, member 6	LARP6	Mixed
dd_Smed_v6_14207_0_1	O75762	ENSG00000104321	transient receptor potential cation channel, subfamily A, member 1	TRPA1	Tissue enhanced	urinary bladder
dd_Smed_v6_1421_0_1	P22234	ENSG00000128050	phosphoribosylaminoimidazole carboxylase, phosphoribosylaminoimidazole succinocarboxamide synthetase	PAICS	Expressed in all tissues
dd_Smed_v6_14221_0_1	Q9UK96	ENSG00000147912	F-box protein 10	FBXO10	Mixed
dd_Smed_v6_14227_0_1	Q6UXP7	ENSG00000152380	family with sequence similarity 151, member B	FAM151B	Mixed
dd_Smed_v6_1423_0_1	O95782	ENSG00000196961	adaptor-related protein complex 2, alpha 1 subunit	AP2A1	Expressed in all tissues
dd_Smed_v6_14243_0_1	Q008S8	ENSG00000203734	epithelial cell transforming sequence 2 oncogene-like	ECT2L	Tissue enriched	fallopian tube
dd_Smed_v6_14245_0_1	Q9BQP7	ENSG00000125871	mitochondrial genome maintenance exonuclease 1	MGME1	Expressed in all tissues
dd_Smed_v6_14253_0_1	Q8NBI5	ENSG00000134802	solute carrier family 43, member 3	SLC43A3	Expressed in all tissues
dd_Smed_v6_14257_0_1	O43427	ENSG00000172500	fibroblast growth factor (acidic) intracellular binding protein	FIBP	Expressed in all tissues
dd_Smed_v6_14261_0_1	O15392	ENSG00000089685	baculoviral IAP repeat containing 5	BIRC5	Mixed
dd_Smed_v6_1427_0_1	Q9H3S3	ENSG00000166682	transmembrane protease, serine 5	TMPRSS5	Tissue enhanced	brain, salivary gland
dd_Smed_v6_14275_0_1	Q6YI46	ENSG00000180694	transmembrane protein 64	TMEM64	Expressed in all tissues
dd_Smed_v6_1428_0_1	P67870	ENSG00000204435	casein kinase 2, beta polypeptide	CSNK2B	Expressed in all tissues
dd_Smed_v6_14281_0_1	Q6L8Q7	ENSG00000174840	phosphodiesterase 12	PDE12	Expressed in all tissues
dd_Smed_v6_14286_0_1	Q8IWA6	ENSG00000183273	coiled-coil domain containing 60	CCDC60	Tissue enhanced	fallopian tube, testis
dd_Smed_v6_14303_0_1	Q5JPH6	ENSG00000103356	glutamyl-tRNA synthetase 2, mitochondrial	EARS2	Expressed in all tissues
dd_Smed_v6_14306_0_1	Q8IZL9	ENSG00000156345	cyclin-dependent kinase 20	CDK20	Mixed
dd_Smed_v6_1431_0_1	Q15287	ENSG00000205937	RNA binding protein S1, serine-rich domain	RNPS1	Expressed in all tissues
dd_Smed_v6_1433_0_1	Q9P0L0	ENSG00000101558	VAMP (vesicle-associated membrane protein)-associated protein A, 33kDa	VAPA	Expressed in all tissues
dd_Smed_v6_14336_0_1	Q9NVR5	ENSG00000165506	dynein, axonemal, assembly factor 2	DNAAF2	Expressed in all tissues
dd_Smed_v6_14345_0_1	Q8TEQ0	ENSG00000048471	sorting nexin 29	SNX29	Expressed in all tissues
dd_Smed_v6_14350_0_1	B1AJZ9	ENSG00000142621	forkhead-associated (FHA) phosphopeptide binding domain 1	FHAD1	Group enriched	fallopian tube,testis
dd_Smed_v6_14363_0_1	P51993	ENSG00000156413	fucosyltransferase 6 (alpha (1,3) fucosyltransferase)	FUT6	Tissue enhanced	esophagus, kidney
dd_Smed_v6_1437_0_1	Q92994	ENSG00000185024	BRF1, RNA polymerase III transcription initiation factor 90 kDa subunit	BRF1	Expressed in all tissues
dd_Smed_v6_14376_0_1	Q9Y252	ENSG00000127870	ring finger protein (C3H2C3 type) 6	RNF6	Expressed in all tissues
dd_Smed_v6_14386_0_1	Q9Y5Y9	ENSG00000185313	sodium channel, voltage-gated, type X, alpha subunit	SCN10A	Not detected
dd_Smed_v6_144_0_1	P62913	ENSG00000142676	ribosomal protein L11	RPL11	Expressed in all tissues
dd_Smed_v6_1441_0_1	P60520	ENSG00000034713	GABA(A) receptor-associated protein-like 2	GABARAPL2	Expressed in all tissues
dd_Smed_v6_1442_0_1	P14927	ENSG00000156467	ubiquinol-cytochrome c reductase binding protein	UQCRB	Expressed in all tissues
dd_Smed_v6_14422_0_1	Q9NWX6	ENSG00000113272	tRNA-histidine guanylyltransferase 1-like (S. cerevisiae)	THG1L	Expressed in all tissues
dd_Smed_v6_14428_0_1	Q96EX3	ENSG00000119333	WD repeat domain 34	WDR34	Expressed in all tissues
dd_Smed_v6_14430_0_1	Q86VD9	ENSG00000119227	phosphatidylinositol glycan anchor biosynthesis, class Z	PIGZ	Tissue enhanced	colon, rectum
dd_Smed_v6_14434_0_1	B1AK53	ENSG00000187017	espin	ESPN	Tissue enhanced	skin, testis
dd_Smed_v6_1445_0_1	Q12931	ENSG00000126602	TNF receptor-associated protein 1	TRAP1	Expressed in all tissues
dd_Smed_v6_14458_0_1	Q96MW7	ENSG00000221944	tigger transposable element derived 1	TIGD1	Mixed
dd_Smed_v6_14471_0_1	O15527	ENSG00000114026	8-oxoguanine DNA glycosylase	OGG1	Expressed in all tissues
dd_Smed_v6_1448_0_1	P61923	ENSG00000111481	coatomer protein complex, subunit zeta 1	COPZ1	Expressed in all tissues
dd_Smed_v6_1449_0_1	O43242	ENSG00000108344	proteasome (prosome, macropain) 26S subunit, non-ATPase, 3	PSMD3	Expressed in all tissues
dd_Smed_v6_14491_0_1	Q86XL3	ENSG00000176915	ankyrin repeat and LEM domain containing 2	ANKLE2	Expressed in all tissues
dd_Smed_v6_145_0_1	P26373	ENSG00000167526	ribosomal protein L13	RPL13	Expressed in all tissues
dd_Smed_v6_14515_0_1	Q8WVL7	ENSG00000168876	ankyrin repeat domain 49	ANKRD49	Expressed in all tissues
dd_Smed_v6_1452_0_1	Q9UI12	ENSG00000047249	ATPase, H+ transporting, lysosomal 50/57kDa, V1 subunit H	ATP6V1H	Expressed in all tissues
dd_Smed_v6_14520_0_1	P47211	ENSG00000166573	galanin receptor 1	GALR1	Tissue enhanced	adrenal gland, brain
dd_Smed_v6_14527_0_1	Q9Y3E1	ENSG00000166503	Hepatoma-derived growth factor-related protein 3	HDGFRP3	Expressed in all tissues
dd_Smed_v6_14545_0_1	Q8NHQ1	ENSG00000114107	centrosomal protein 70kDa	CEP70	Expressed in all tissues
dd_Smed_v6_14547_0_1	Q9UQ84	ENSG00000174371	exonuclease 1	EXO1	Tissue enhanced	bone marrow
dd_Smed_v6_14554_0_1	Q9NTN3	ENSG00000116704	solute carrier family 35 (UDP-GlcA/UDP-GalNAc transporter), member D1	SLC35D1	Expressed in all tissues
dd_Smed_v6_14559_0_1	O43822	ENSG00000160226	chromosome 21 open reading frame 2	C21orf2	Expressed in all tissues
dd_Smed_v6_1456_0_1	P36957	ENSG00000119689	dihydrolipoamide S-succinyltransferase (E2 component of 2-oxo-glutarate complex)	DLST	Expressed in all tissues
dd_Smed_v6_14572_0_1	Q86VQ0	ENSG00000135338	Leber congenital amaurosis 5	LCA5	Mixed
dd_Smed_v6_1458_0_1	P28330	ENSG00000115361	acyl-CoA dehydrogenase, long chain	ACADL	Mixed
dd_Smed_v6_14585_0_1	Q86TW2	ENSG00000063761	aarF domain containing kinase 1	ADCK1	Expressed in all tissues
dd_Smed_v6_14586_0_1	Q13315	ENSG00000149311	ataxia telangiectasia mutated	ATM	Expressed in all tissues
dd_Smed_v6_14598_0_1	Q9UI36	ENSG00000165659	dachshund homolog 1 (Drosophila)	DACH1	Mixed
dd_Smed_v6_14599_0_1	Q6PIW4	ENSG00000132436	fidgetin-like 1	FIGNL1	Mixed
dd_Smed_v6_1460_0_1	O94760	ENSG00000153904	dimethylarginine dimethylaminohydrolase 1	DDAH1	Mixed
dd_Smed_v6_1461_0_1	O75947	ENSG00000167863	ATP synthase, H+ transporting, mitochondrial Fo complex, subunit d	ATP5H	Expressed in all tissues
dd_Smed_v6_14611_0_1	P11308	ENSG00000157554	v-ets avian erythroblastosis virus E26 oncogene homolog	ERG	Expressed in all tissues
dd_Smed_v6_14619_0_1	O75140	ENSG00000100150	DEP domain containing 5	DEPDC5	Expressed in all tissues
dd_Smed_v6_1462_0_1	O43765	ENSG00000104969	small glutamine-rich tetratricopeptide repeat (TPR)-containing, alpha	SGTA	Expressed in all tissues
dd_Smed_v6_14625_0_1	O43909	ENSG00000012232	exostosin-like glycosyltransferase 3	EXTL3	Expressed in all tissues
dd_Smed_v6_1463_0_1	Q13492	ENSG00000073921	phosphatidylinositol binding clathrin assembly protein	PICALM	Expressed in all tissues
dd_Smed_v6_14632_0_1	Q96FL8	ENSG00000142494	solute carrier family 47 (multidrug and toxin extrusion), member 1	SLC47A1	Tissue enhanced	adrenal gland, kidney
dd_Smed_v6_14636_0_1	Q96HE8	ENSG00000177042	transmembrane protein 80	TMEM80	Expressed in all tissues
dd_Smed_v6_14640_0_1	A8MXV4	ENSG00000213965	nudix (nucleoside diphosphate linked moiety X)-type motif 19	NUDT19	Expressed in all tissues
dd_Smed_v6_14642_0_1	Q92535	ENSG00000135845	phosphatidylinositol glycan anchor biosynthesis, class C	PIGC	Expressed in all tissues
dd_Smed_v6_1465_1_1	Q9Y3B3	ENSG00000134970	transmembrane emp24 protein transport domain containing 7	TMED7	Expressed in all tissues
dd_Smed_v6_14652_0_1	Q6ZMT1	ENSG00000141750	SH3 and cysteine rich domain 2	STAC2	Tissue enhanced	brain
dd_Smed_v6_1466_0_1	Q9Y3E2	ENSG00000178096	bolA family member 1	BOLA1	Expressed in all tissues
dd_Smed_v6_1467_0_1	Q96C19	ENSG00000142634	EF-hand domain family, member D2	EFHD2	Expressed in all tissues
dd_Smed_v6_1468_0_1	P00387	ENSG00000100243	cytochrome b5 reductase 3	CYB5R3	Expressed in all tissues
dd_Smed_v6_1469_0_1	P15170	ENSG00000103342	G1 to S phase transition 1	GSPT1	Expressed in all tissues
dd_Smed_v6_14696_0_1	Q06190	ENSG00000073711	protein phosphatase 2, regulatory subunit B'', alpha	PPP2R3A	Tissue enhanced	skeletal muscle
dd_Smed_v6_147_0_1	P31689	ENSG00000086061	DnaJ (Hsp40) homolog, subfamily A, member 1	DNAJA1	Expressed in all tissues
dd_Smed_v6_14700_0_1	Q9Y4F1	ENSG00000152767	FERM, RhoGEF (ARHGEF) and pleckstrin domain protein 1 (chondrocyte-derived)	FARP1	Mixed
dd_Smed_v6_14712_0_1	P50549	ENSG00000006468	ets variant 1	ETV1	Tissue enhanced	salivary gland
dd_Smed_v6_1472_0_1	Q9H2J4	ENSG00000115539	phosducin-like 3	PDCL3	Expressed in all tissues
dd_Smed_v6_14722_0_1	Q6ZNQ3	ENSG00000214954	leucine rich repeat containing 69	LRRC69	Mixed
dd_Smed_v6_14728_0_1	Q9C0C7	ENSG00000110497	autophagy/beclin-1 regulator 1	AMBRA1	Expressed in all tissues
dd_Smed_v6_14730_0_1	Q9P0X4	ENSG00000100346	calcium channel, voltage-dependent, T type, alpha 1I subunit	CACNA1I	Tissue enhanced	brain
dd_Smed_v6_14737_0_1	Q92547	ENSG00000163781	topoisomerase (DNA) II binding protein 1	TOPBP1	Expressed in all tissues
dd_Smed_v6_1474_0_1	Q14318	ENSG00000105701	FK506 binding protein 8, 38kDa	FKBP8	Expressed in all tissues
dd_Smed_v6_14753_0_1	Q9NQ33	ENSG00000176009	achaete-scute family bHLH transcription factor 3	ASCL3	Tissue enriched	salivary gland
dd_Smed_v6_14757_0_1	A4D0V7	ENSG00000106034	cadherin-like and PC-esterase domain containing 1	CPED1	Mixed
dd_Smed_v6_14758_0_1	Q9Y2C4	ENSG00000157036	endo/exonuclease (5'-3'), endonuclease G-like	EXOG	Expressed in all tissues
dd_Smed_v6_1476_0_1	A2RTX5	ENSG00000185418	threonyl-tRNA synthetase-like 2	TARSL2	Expressed in all tissues
dd_Smed_v6_14765_0_1	Q6S9Z5	ENSG00000164185	zinc finger protein 474	ZNF474	Group enriched	fallopian tube,testis
dd_Smed_v6_14773_0_1	Q8IYK2	ENSG00000160994	coiled-coil domain containing 105	CCDC105	Tissue enriched	testis
dd_Smed_v6_1478_0_1	Q16555	ENSG00000092964	dihydropyrimidinase-like 2	DPYSL2	Expressed in all tissues
dd_Smed_v6_14783_0_1	Q13394	ENSG00000180660	mab-21-like 1 (C. elegans)	MAB21L1	Tissue enhanced	adrenal gland
dd_Smed_v6_1479_0_1	O75689	ENSG00000105963	ArfGAP with dual PH domains 1	ADAP1	Mixed
dd_Smed_v6_14816_0_1	Q7Z699	ENSG00000166068	sprouty-related, EVH1 domain containing 1	SPRED1	Mixed
dd_Smed_v6_14819_0_1	Q9H974	ENSG00000151576	queuine tRNA-ribosyltransferase domain containing 1	QTRTD1	Expressed in all tissues
dd_Smed_v6_1482_0_1	Q15005	ENSG00000118363	signal peptidase complex subunit 2 homolog (S. cerevisiae)	SPCS2	Expressed in all tissues
dd_Smed_v6_14822_0_1	Q4G0A6	ENSG00000106125	family with sequence similarity 188, member B	FAM188B	Mixed
dd_Smed_v6_14824_0_1	Q99684	ENSG00000162676	growth factor independent 1 transcription repressor	GFI1	Tissue enhanced	bone marrow
dd_Smed_v6_1485_0_1	Q9BUJ2	ENSG00000105323	heterogeneous nuclear ribonucleoprotein U-like 1	HNRNPUL1	Expressed in all tissues
dd_Smed_v6_14850_0_1	Q12879	ENSG00000183454	glutamate receptor, ionotropic, N-methyl D-aspartate 2A	GRIN2A	Tissue enhanced	brain
dd_Smed_v6_14851_0_1	Q6ZRR7	ENSG00000131951	leucine rich repeat containing 9	LRRC9	Group enriched	fallopian tube,testis
dd_Smed_v6_14852_0_1	O95631	ENSG00000065320	netrin 1	NTN1	Mixed
dd_Smed_v6_14853_0_1	Q8IYT4	ENSG00000167216	katanin p60 subunit A-like 2	KATNAL2	Tissue enhanced	testis
dd_Smed_v6_14854_0_1	Q9BUU2	ENSG00000067365	methyltransferase like 22	METTL22	Expressed in all tissues
dd_Smed_v6_14863_0_1	Q96L42	ENSG00000183960	potassium voltage-gated channel, subfamily H (eag-related), member 8	KCNH8	Tissue enhanced	brain
dd_Smed_v6_1489_0_1	Q6ZS10	ENSG00000187912	C-type lectin domain family 17, member A	CLEC17A	Group enriched	appendix,lymph node,spleen,tonsil
dd_Smed_v6_14890_0_1	Q8NEE6	ENSG00000161040	F-box and leucine-rich repeat protein 13	FBXL13	Tissue enhanced	testis
dd_Smed_v6_149_0_1	P62910	ENSG00000144713	ribosomal protein L32	RPL32	Expressed in all tissues
dd_Smed_v6_1493_0_1	P49419	ENSG00000164904	aldehyde dehydrogenase 7 family, member A1	ALDH7A1	Expressed in all tissues
dd_Smed_v6_14936_0_1	Q5T6J7	ENSG00000148057	idnK, gluconokinase homolog (E. coli)	IDNK	Expressed in all tissues
dd_Smed_v6_14940_0_1	Q5T124	ENSG00000158062	UBX domain protein 11	UBXN11	Expressed in all tissues
dd_Smed_v6_14945_0_1	Q7Z3D4	ENSG00000176018	LysM, putative peptidoglycan-binding, domain containing 3	LYSMD3	Expressed in all tissues
dd_Smed_v6_1495_0_1	P51580	ENSG00000137364	thiopurine S-methyltransferase	TPMT	Expressed in all tissues
dd_Smed_v6_1496_0_1	Q9NXV2	ENSG00000167977	potassium channel tetramerization domain containing 5	KCTD5	Expressed in all tissues
dd_Smed_v6_14961_0_1	Q9NY99	ENSG00000172554	syntrophin, gamma 2	SNTG2	Tissue enhanced	testis
dd_Smed_v6_14962_0_1	Q6NXP6	ENSG00000165555	NADP-dependent oxidoreductase domain containing 1	NOXRED1	Tissue enriched	testis
dd_Smed_v6_14970_0_1	Q5VTY9	ENSG00000054392	hedgehog acyltransferase	HHAT	Mixed
dd_Smed_v6_1498_0_1	O15258	ENSG00000157916	retention in endoplasmic reticulum sorting receptor 1	RER1	Expressed in all tissues
dd_Smed_v6_14985_0_1	Q05C16	ENSG00000173988	leucine rich repeat containing 63	LRRC63	Group enriched	fallopian tube,testis
dd_Smed_v6_150_0_1	P32969	ENSG00000163682	ribosomal protein L9	RPL9	Expressed in all tissues
dd_Smed_v6_1500_0_1	Q969G6	ENSG00000135002	riboflavin kinase	RFK	Expressed in all tissues
dd_Smed_v6_15000_0_1	P00403	ENSG00000198712	mitochondrially encoded cytochrome c oxidase II	MT-CO2	Expressed in all tissues
dd_Smed_v6_15015_0_1	Q8IWZ6	ENSG00000138686	Bardet-Biedl syndrome 7	BBS7	Expressed in all tissues
dd_Smed_v6_15016_0_1	O75506	ENSG00000230989	heat shock factor binding protein 1	HSBP1	Expressed in all tissues
dd_Smed_v6_15018_0_1	Q9H6E4	ENSG00000100147	coiled-coil domain containing 134	CCDC134	Mixed
dd_Smed_v6_1502_0_1	P30040	ENSG00000089248	endoplasmic reticulum protein 29	ERP29	Expressed in all tissues
dd_Smed_v6_15022_0_1	Q13416	ENSG00000115942	origin recognition complex, subunit 2	ORC2	Expressed in all tissues
dd_Smed_v6_15036_0_1	Q9UHM6	ENSG00000122375	opsin 4	OPN4	Tissue enhanced	brain, skeletal muscle
dd_Smed_v6_1504_0_1	Q99653	ENSG00000187446	calcineurin-like EF-hand protein 1	CHP1	Expressed in all tissues
dd_Smed_v6_1505_0_1	Q15582	ENSG00000120708	transforming growth factor, beta-induced, 68kDa	TGFBI	Expressed in all tissues
dd_Smed_v6_1506_0_1	H3BP13	ENSG00000167515	trafficking protein particle complex 2-like	TRAPPC2L	Expressed in all tissues
dd_Smed_v6_15071_0_1	Q96AY2	ENSG00000154920	essential meiotic structure-specific endonuclease 1	EME1	Tissue enhanced	testis
dd_Smed_v6_1509_0_1	Q9NVA2	ENSG00000138758	septin 11	2018-09-11	Expressed in all tissues
dd_Smed_v6_15097_0_1	O94925	ENSG00000115419	glutaminase	GLS	Expressed in all tissues
dd_Smed_v6_151_0_1	P46777	ENSG00000122406	ribosomal protein L5	RPL5	Expressed in all tissues
dd_Smed_v6_15104_0_1	Q7Z6R9	ENSG00000008197	transcription factor AP-2 delta (activating enhancer binding protein 2 delta)	TFAP2D	Not detected
dd_Smed_v6_15107_0_1	O75603	ENSG00000124827	glial cells missing homolog 2 (Drosophila)	GCM2	Not detected
dd_Smed_v6_1512_0_1	P51911	ENSG00000130176	calponin 1, basic, smooth muscle	CNN1	Tissue enhanced	smooth muscle
dd_Smed_v6_15138_0_1	C9JQI7	ENSG00000186952	transmembrane protein 232	TMEM232	Tissue enhanced	fallopian tube, testis
dd_Smed_v6_1514_0_1	Q9UQN3	ENSG00000083937	charged multivesicular body protein 2B	CHMP2B	Expressed in all tissues
dd_Smed_v6_15144_0_1	P50458	ENSG00000106689	LIM homeobox 2	LHX2	Tissue enriched	brain
dd_Smed_v6_1515_0_1	P47985	ENSG00000169021	ubiquinol-cytochrome c reductase, Rieske iron-sulfur polypeptide 1	UQCRFS1	Expressed in all tissues
dd_Smed_v6_1516_0_1	Q9Y5L4	ENSG00000099800	translocase of inner mitochondrial membrane 13 homolog (yeast)	TIMM13	Expressed in all tissues
dd_Smed_v6_15163_0_1	Q9P2W1	ENSG00000131470	PSMC3 interacting protein	PSMC3IP	Expressed in all tissues
dd_Smed_v6_1517_0_1	Q03013	ENSG00000168765	glutathione S-transferase mu 4	GSTM4	Expressed in all tissues
dd_Smed_v6_1519_0_1	Q03154	ENSG00000243989	aminoacylase 1	ACY1	Group enriched	duodenum,kidney,liver,small intestine
dd_Smed_v6_15201_0_1	Q3B820	ENSG00000170264	family with sequence similarity 161, member A	FAM161A	Tissue enhanced	testis
dd_Smed_v6_15205_0_1	Q5TGZ0	ENSG00000173436	mitochondrial inner membrane organizing system 1	MINOS1	Expressed in all tissues
dd_Smed_v6_15207_0_1	Q8IUZ0	ENSG00000137821	leucine rich repeat containing 49	LRRC49	Tissue enhanced	heart muscle
dd_Smed_v6_1521_0_1	Q9HC24	ENSG00000155957	transmembrane BAX inhibitor motif containing 4	TMBIM4	Expressed in all tissues
dd_Smed_v6_1522_0_1	Q96B97	ENSG00000147010	SH3-domain kinase binding protein 1	SH3KBP1	Expressed in all tissues
dd_Smed_v6_1523_0_1	Q96LB9	ENSG00000159527	peptidoglycan recognition protein 3	PGLYRP3	Group enriched	esophagus,skin
dd_Smed_v6_1524_0_1	Q16795	ENSG00000139180	NADH dehydrogenase (ubiquinone) 1 alpha subcomplex, 9, 39kDa	NDUFA9	Expressed in all tissues
dd_Smed_v6_15243_0_1	Q9NS85	ENSG00000154975	carbonic anhydrase X	CA10	Tissue enhanced	brain
dd_Smed_v6_15253_0_1	O75364	ENSG00000107859	paired-like homeodomain 3	PITX3	Tissue enriched	skeletal muscle
dd_Smed_v6_15269_0_1	O95461	ENSG00000133424	like-glycosyltransferase	LARGE	Mixed
dd_Smed_v6_1529_0_1	Q9Y284	ENSG00000105583	WD repeat domain 83 opposite strand	WDR83OS	Expressed in all tissues
dd_Smed_v6_15290_0_1	Q7RTT9	ENSG00000164638	solute carrier family 29 (equilibrative nucleoside transporter), member 4	SLC29A4	Tissue enriched	adipose tissue
dd_Smed_v6_15291_0_1	Q8N5T2	ENSG00000109680	TBC1 domain family, member 19	TBC1D19	Expressed in all tissues
dd_Smed_v6_153_0_1	P62837	ENSG00000131508	ubiquitin-conjugating enzyme E2D 2	UBE2D2	Expressed in all tissues
dd_Smed_v6_15308_0_1	O95755	ENSG00000100228	RAB36, member RAS oncogene family	RAB36	Tissue enhanced	fallopian tube
dd_Smed_v6_1532_0_1	P11217	ENSG00000068976	phosphorylase, glycogen, muscle	PYGM	Tissue enriched	skeletal muscle
dd_Smed_v6_15330_0_1	Q9NZB8	ENSG00000124615	molybdenum cofactor synthesis 1	MOCS1	Mixed
dd_Smed_v6_15335_0_1	Q9NYM4	ENSG00000123901	G protein-coupled receptor 83	GPR83	Tissue enhanced	brain, thyroid gland
dd_Smed_v6_15349_0_1	O75915	ENSG00000144746	ADP-ribosylation-like factor 6 interacting protein 5	ARL6IP5	Expressed in all tissues
dd_Smed_v6_1535_0_1	P63279	ENSG00000103275	ubiquitin-conjugating enzyme E2I	UBE2I	Expressed in all tissues
dd_Smed_v6_15356_0_1	Q9H251	ENSG00000107736	cadherin-related 23	CDH23	Tissue enhanced	ovary
dd_Smed_v6_15359_0_1	Q8N4P3	ENSG00000184508	HD domain containing 3	HDDC3	Expressed in all tissues
dd_Smed_v6_1536_0_1	P26885	ENSG00000173486	FK506 binding protein 2, 13kDa	FKBP2	Expressed in all tissues
dd_Smed_v6_15364_0_1	Q8IXU6	ENSG00000110660	solute carrier family 35, member F2	SLC35F2	Mixed
dd_Smed_v6_1537_0_1	Q14554	ENSG00000065485	protein disulfide isomerase family A, member 5	PDIA5	Expressed in all tissues
dd_Smed_v6_15379_0_1	Q6ZMT9	ENSG00000197057	death domain containing 1	DTHD1	Tissue enhanced	fallopian tube
dd_Smed_v6_15389_0_1	Q9Y248	ENSG00000131153	GINS complex subunit 2 (Psf2 homolog)	GINS2	Mixed
dd_Smed_v6_1539_0_1	Q9Y3D3	ENSG00000182180	mitochondrial ribosomal protein S16	MRPS16	Expressed in all tissues
dd_Smed_v6_15403_0_1	O95568	ENSG00000171806	methyltransferase like 18	METTL18	Expressed in all tissues
dd_Smed_v6_1541_0_1	P25789	ENSG00000041357	proteasome (prosome, macropain) subunit, alpha type, 4	PSMA4	Expressed in all tissues
dd_Smed_v6_15419_0_1	O00222	ENSG00000179603	glutamate receptor, metabotropic 8	GRM8	Tissue enhanced	testis
dd_Smed_v6_1542_0_1	Q96B21	ENSG00000151715	transmembrane protein 45B	TMEM45B	Tissue enhanced	duodenum, small intestine
dd_Smed_v6_15425_0_1	P22001	ENSG00000177272	potassium voltage-gated channel, shaker-related subfamily, member 3	KCNA3	Mixed
dd_Smed_v6_15427_0_1	Q9H9A7	ENSG00000178966	RecQ mediated genome instability 1	RMI1	Expressed in all tissues
dd_Smed_v6_15437_0_1	Q86UR5	ENSG00000079841	regulating synaptic membrane exocytosis 1	RIMS1	Tissue enhanced	brain
dd_Smed_v6_15439_0_1	P29371	ENSG00000169836	tachykinin receptor 3	TACR3	Not detected
dd_Smed_v6_15447_0_1	O95427	ENSG00000197563	phosphatidylinositol glycan anchor biosynthesis, class N	PIGN	Expressed in all tissues
dd_Smed_v6_15458_0_1	Q7RTS6	ENSG00000183034	otopetrin 2	OTOP2	Tissue enhanced	colon, rectum
dd_Smed_v6_15463_0_1	P52701	ENSG00000116062	mutS homolog 6	MSH6	Expressed in all tissues
dd_Smed_v6_15465_0_1	Q9NZJ0	ENSG00000143476	denticleless E3 ubiquitin protein ligase homolog (Drosophila)	DTL	Tissue enhanced	bone marrow, testis
dd_Smed_v6_15469_0_1	Q9H1J7	ENSG00000111186	wingless-type MMTV integration site family, member 5B	WNT5B	Mixed
dd_Smed_v6_1547_0_1	Q86YJ6	ENSG00000144115	threonine synthase-like 2 (S. cerevisiae)	THNSL2	Mixed
dd_Smed_v6_15486_0_1	Q2KHR2	ENSG00000181827	regulatory factor X, 7	RFX7	Expressed in all tissues
dd_Smed_v6_155_1_1	P46776	ENSG00000166441	ribosomal protein L27a	RPL27A	Expressed in all tissues
dd_Smed_v6_15516_0_1	P32243	ENSG00000165588	orthodenticle homeobox 2	OTX2	Not detected
dd_Smed_v6_1552_0_1	O60239	ENSG00000131370	SH3-domain binding protein 5 (BTK-associated)	SH3BP5	Expressed in all tissues
dd_Smed_v6_15532_0_1	Q92698	ENSG00000085999	RAD54-like (S. cerevisiae)	RAD54L	Mixed
dd_Smed_v6_15542_0_1	Q9UQ07	ENSG00000080823	MOK protein kinase	MOK	Expressed in all tissues
dd_Smed_v6_15555_0_1	Q15319	ENSG00000091010	POU class 4 homeobox 3	POU4F3	Not detected
dd_Smed_v6_15557_0_1	Q96HA7	ENSG00000160949	tonsoku-like, DNA repair protein	TONSL	Mixed
dd_Smed_v6_1556_0_1	Q9UN37	ENSG00000132612	vacuolar protein sorting 4 homolog A (S. cerevisiae)	VPS4A	Expressed in all tissues
dd_Smed_v6_15567_0_1	Q9NWW6	ENSG00000106733	nicotinamide riboside kinase 1	NMRK1	Expressed in all tissues
dd_Smed_v6_1557_0_1	P25788	ENSG00000100567	proteasome (prosome, macropain) subunit, alpha type, 3	PSMA3	Expressed in all tissues
dd_Smed_v6_1559_0_1	P51572	ENSG00000185825	B-cell receptor-associated protein 31	BCAP31	Expressed in all tissues
dd_Smed_v6_15598_0_1	Q99943	ENSG00000204310	1-acylglycerol-3-phosphate O-acyltransferase 1	AGPAT1	Expressed in all tissues
dd_Smed_v6_156_0_1	P62241	ENSG00000142937	ribosomal protein S8	RPS8	Expressed in all tissues
dd_Smed_v6_15606_0_1	Q9UBD5	ENSG00000135336	origin recognition complex, subunit 3	ORC3	Expressed in all tissues
dd_Smed_v6_15609_0_1	Q53HC0	ENSG00000119242	coiled-coil domain containing 92	CCDC92	Expressed in all tissues
dd_Smed_v6_1562_0_1	Q9H3N1	ENSG00000139921	thioredoxin-related transmembrane protein 1	TMX1	Expressed in all tissues
dd_Smed_v6_15620_0_1	Q9UGI6	ENSG00000143603	potassium intermediate/small conductance calcium-activated channel, subfamily N, member 3	KCNN3	Tissue enhanced	brain
dd_Smed_v6_15639_0_1	Q92889	ENSG00000175595	excision repair cross-complementing rodent repair deficiency, complementation group 4	ERCC4	Expressed in all tissues
dd_Smed_v6_1564_0_1	Q9BZL1	ENSG00000198258	ubiquitin-like 5	UBL5	Expressed in all tissues
dd_Smed_v6_15647_0_1	Q6IMI6	ENSG00000196228	sulfotransferase family, cytosolic, 1C, member 3	SULT1C3	Tissue enhanced	duodenum, small intestine
dd_Smed_v6_1565_0_1	Q5VXJ0	ENSG00000204021	lipase, family member K	LIPK	Tissue enriched	skin
dd_Smed_v6_15654_0_1	Q9BZW2	ENSG00000081800	solute carrier family 13 (sodium/sulfate symporter), member 1	SLC13A1	Tissue enhanced	kidney, small intestine
dd_Smed_v6_15655_0_1	Q9NWK9	ENSG00000117174	zinc finger, HIT-type containing 6	ZNHIT6	Expressed in all tissues
dd_Smed_v6_1566_0_1	P16519	ENSG00000125851	proprotein convertase subtilisin/kexin type 2	PCSK2	Tissue enhanced	adrenal gland
dd_Smed_v6_1567_0_1	O15269	ENSG00000090054	serine palmitoyltransferase, long chain base subunit 1	SPTLC1	Expressed in all tissues
dd_Smed_v6_15678_0_1	O60921	ENSG00000136273	HUS1 checkpoint homolog (S. pombe)	HUS1	Expressed in all tissues
dd_Smed_v6_1568_0_1	P13051	ENSG00000076248	uracil-DNA glycosylase	UNG	Expressed in all tissues
dd_Smed_v6_15691_0_1	Q92485	ENSG00000130768	sphingomyelin phosphodiesterase, acid-like 3B	SMPDL3B	Mixed
dd_Smed_v6_15723_0_1	Q7L9B9	ENSG00000122547	endonuclease/exonuclease/phosphatase family domain containing 1	EEPD1	Expressed in all tissues
dd_Smed_v6_15726_0_1	Q8IZT6	ENSG00000066279	asp (abnormal spindle) homolog, microcephaly associated (Drosophila)	ASPM	Mixed
dd_Smed_v6_1574_4_1	Q9NPR9	ENSG00000125734	G protein-coupled receptor 108	GPR108	Expressed in all tissues
dd_Smed_v6_15742_1_1	Q8IV61	ENSG00000152689	RAS guanyl releasing protein 3 (calcium and DAG-regulated)	RASGRP3	Expressed in all tissues
dd_Smed_v6_15780_0_1	Q8TAM2	ENSG00000165533	tetratricopeptide repeat domain 8	TTC8	Expressed in all tissues
dd_Smed_v6_1579_0_1	P29400	ENSG00000188153	collagen, type IV, alpha 5	COL4A5	Mixed
dd_Smed_v6_15794_0_1	Q8IY84	ENSG00000177453	NIM1 serine/threonine protein kinase	NIM1K	Tissue enriched	brain
dd_Smed_v6_15795_0_1	Q5W5X9	ENSG00000103852	tetratricopeptide repeat domain 23	TTC23	Mixed
dd_Smed_v6_1580_0_1	P31153	ENSG00000168906	methionine adenosyltransferase II, alpha	MAT2A	Expressed in all tissues
dd_Smed_v6_1583_0_1	P28072	ENSG00000142507	proteasome (prosome, macropain) subunit, beta type, 6	PSMB6	Expressed in all tissues
dd_Smed_v6_1584_0_1	Q9UBR1	ENSG00000100024	ureidopropionase, beta	UPB1	Group enriched	kidney,liver
dd_Smed_v6_1585_0_1	P35520	ENSG00000160200	cystathionine-beta-synthase	CBS	Tissue enhanced	liver, pancreas
dd_Smed_v6_1586_0_1	Q969X1	ENSG00000135926	transmembrane BAX inhibitor motif containing 1	TMBIM1	Expressed in all tissues
dd_Smed_v6_15876_0_1	Q9NZV8	ENSG00000184408	potassium voltage-gated channel, Shal-related subfamily, member 2	KCND2	Tissue enhanced	brain
dd_Smed_v6_15877_0_1	Q9H6J7	ENSG00000149179	chromosome 11 open reading frame 49	C11orf49	Expressed in all tissues
dd_Smed_v6_1589_0_1	Q16864	ENSG00000128524	ATPase, H+ transporting, lysosomal 14kDa, V1 subunit F	ATP6V1F	Expressed in all tissues
dd_Smed_v6_15894_0_1	Q5FWF5	ENSG00000141446	establishment of sister chromatid cohesion N-acetyltransferase 1	ESCO1	Expressed in all tissues
dd_Smed_v6_15904_0_1	Q8NF91	ENSG00000131018	spectrin repeat containing, nuclear envelope 1	SYNE1	Expressed in all tissues
dd_Smed_v6_15909_0_1	Q6ZQY2	ENSG00000187905	Leucine-rich repeat-containing protein LOC400891	AC002472.13	Tissue enhanced	fallopian tube, testis
dd_Smed_v6_1591_0_1	Q9UBC2	ENSG00000127527	epidermal growth factor receptor pathway substrate 15-like 1	EPS15L1	Expressed in all tissues
dd_Smed_v6_1592_0_1	P33947	ENSG00000136240	KDEL (Lys-Asp-Glu-Leu) endoplasmic reticulum protein retention receptor 2	KDELR2	Expressed in all tissues
dd_Smed_v6_15923_0_1	P51787	ENSG00000053918	potassium voltage-gated channel, KQT-like subfamily, member 1	KCNQ1	Tissue enhanced	adrenal gland, thyroid gland
dd_Smed_v6_1593_0_1	P55084	ENSG00000138029	hydroxyacyl-CoA dehydrogenase/3-ketoacyl-CoA thiolase/enoyl-CoA hydratase (trifunctional protein), beta subunit	HADHB	Expressed in all tissues
dd_Smed_v6_15937_0_1	O75821	ENSG00000130811	eukaryotic translation initiation factor 3, subunit G	EIF3G	Expressed in all tissues
dd_Smed_v6_15950_0_1	Q9Y233	ENSG00000112541	phosphodiesterase 10A	PDE10A	Tissue enhanced	thyroid gland
dd_Smed_v6_1596_0_1	Q9Y266	ENSG00000090273	nudC nuclear distribution protein	NUDC	Expressed in all tissues
dd_Smed_v6_1597_0_1	O75153	ENSG00000132361	clustered mitochondria (cluA/CLU1) homolog	CLUH	Expressed in all tissues
dd_Smed_v6_160_0_1	P07108	ENSG00000155368	diazepam binding inhibitor (GABA receptor modulator, acyl-CoA binding protein)	DBI	Expressed in all tissues
dd_Smed_v6_1600_0_1	P60228	ENSG00000104408	eukaryotic translation initiation factor 3, subunit E	EIF3E	Expressed in all tissues
dd_Smed_v6_1603_0_1	Q96I23	ENSG00000145337	PIGY upstream reading frame	PYURF	Expressed in all tissues
dd_Smed_v6_16034_0_1	O00311	ENSG00000097046	cell division cycle 7	CDC7	Mixed
dd_Smed_v6_16037_0_1	P28335	ENSG00000147246	5-hydroxytryptamine (serotonin) receptor 2C, G protein-coupled	HTR2C	Tissue enriched	brain
dd_Smed_v6_1604_0_1	P08237	ENSG00000152556	phosphofructokinase, muscle	PFKM	Group enriched	heart muscle,skeletal muscle
dd_Smed_v6_16040_0_1	Q6P3X8	ENSG00000185220	piggyBac transposable element derived 2	PGBD2	Mixed
dd_Smed_v6_16043_0_1	P54219	ENSG00000036565	solute carrier family 18 (vesicular monoamine transporter), member 1	SLC18A1	Tissue enriched	adrenal gland
dd_Smed_v6_16049_0_1	Q96NH3	ENSG00000146350	TBC1 domain family, member 32	TBC1D32	Mixed
dd_Smed_v6_1605_0_1	Q16891	ENSG00000132305	inner membrane protein, mitochondrial	IMMT	Expressed in all tissues
dd_Smed_v6_1606_0_1	P61970	ENSG00000102898	nuclear transport factor 2	NUTF2	Expressed in all tissues
dd_Smed_v6_16070_0_1	O60682	ENSG00000178860	musculin	MSC	Mixed
dd_Smed_v6_1608_0_1	Q8IX12	ENSG00000060339	cell division cycle and apoptosis regulator 1	CCAR1	Expressed in all tissues
dd_Smed_v6_1609_0_1	Q9UKD2	ENSG00000053372	mRNA turnover 4 homolog (S. cerevisiae)	MRTO4	Expressed in all tissues
dd_Smed_v6_161_0_1	P05388	ENSG00000089157	ribosomal protein, large, P0	RPLP0	Expressed in all tissues
dd_Smed_v6_1611_0_1	Q8WWX9	ENSG00000198832	Selenoprotein M	SELM	Tissue enriched	adrenal gland
dd_Smed_v6_16127_0_1	Q86WZ0	ENSG00000187105	HEAT repeat containing 4	HEATR4	Tissue enriched	testis
dd_Smed_v6_1614_0_1	Q8TCJ2	ENSG00000163527	STT3B, subunit of the oligosaccharyltransferase complex (catalytic)	STT3B	Expressed in all tissues
dd_Smed_v6_1618_0_1	Q13595	ENSG00000164548	transformer 2 alpha homolog (Drosophila)	TRA2A	Expressed in all tissues
dd_Smed_v6_1621_0_1	Q9H2A2	ENSG00000118514	aldehyde dehydrogenase 8 family, member A1	ALDH8A1	Group enriched	kidney,liver
dd_Smed_v6_1622_0_1	Q99437	ENSG00000117410	ATPase, H+ transporting, lysosomal 21kDa, V0 subunit b	ATP6V0B	Expressed in all tissues
dd_Smed_v6_1626_0_1	O00160	ENSG00000142347	myosin IF	MYO1F	Expressed in all tissues
dd_Smed_v6_1628_0_1	Q13409	ENSG00000077380	dynein, cytoplasmic 1, intermediate chain 2	DYNC1I2	Expressed in all tissues
dd_Smed_v6_16281_0_1	Q03112	ENSG00000085276	MDS1 and EVI1 complex locus	MECOM	Mixed
dd_Smed_v6_16294_0_1	O94885	ENSG00000111961	SAM and SH3 domain containing 1	SASH1	Mixed
dd_Smed_v6_16297_0_1	Q99958	ENSG00000176692	forkhead box C2 (MFH-1, mesenchyme forkhead 1)	FOXC2	Tissue enhanced	kidney
dd_Smed_v6_163_0_1	P61247	ENSG00000145425	ribosomal protein S3A	RPS3A	Expressed in all tissues
dd_Smed_v6_16334_0_1	Q7L590	ENSG00000065328	minichromosome maintenance complex component 10	MCM10	Mixed
dd_Smed_v6_16355_0_1	Q6ZMV7	ENSG00000197980	leucine, glutamate and lysine rich 1	LEKR1	Tissue enhanced	testis
dd_Smed_v6_16356_0_1	Q8IXR9	ENSG00000185306	chromosome 12 open reading frame 56	C12orf56	Tissue enhanced	testis
dd_Smed_v6_16362_0_1	P19801	ENSG00000002726	amine oxidase, copper containing 1	AOC1	Group enriched	colon,duodenum,kidney,placenta,rectum,small intestine
dd_Smed_v6_1637_0_1	O75955	ENSG00000137312	flotillin 1	FLOT1	Expressed in all tissues
dd_Smed_v6_16379_0_1	Q9H6X5	ENSG00000105072	chromosome 19 open reading frame 44	C19orf44	Expressed in all tissues
dd_Smed_v6_1638_0_1	Q96A35	ENSG00000143314	mitochondrial ribosomal protein L24	MRPL24	Expressed in all tissues
dd_Smed_v6_16390_0_1	P52569	ENSG00000003989	solute carrier family 7 (cationic amino acid transporter, y+ system), member 2	SLC7A2	Tissue enhanced	liver
dd_Smed_v6_164_0_1	P62847	ENSG00000138326	ribosomal protein S24	RPS24	Expressed in all tissues
dd_Smed_v6_1640_0_1	Q4VNC1	ENSG00000127249	ATPase type 13A4	ATP13A4	Tissue enhanced	lung, thyroid gland
dd_Smed_v6_16407_0_1	Q8NEC7	ENSG00000138780	glutathione S-transferase, C-terminal domain containing	GSTCD	Expressed in all tissues
dd_Smed_v6_16409_0_1	Q969F2	ENSG00000145506	naked cuticle homolog 2 (Drosophila)	NKD2	Tissue enhanced	lung
dd_Smed_v6_1641_0_1	P62310	ENSG00000170860	LSM3 homolog, U6 small nuclear RNA associated (S. cerevisiae)	LSM3	Expressed in all tissues
dd_Smed_v6_16418_0_1	Q9BUL9	ENSG00000178718	ribonuclease P/MRP 25kDa subunit	RPP25	Mixed
dd_Smed_v6_1642_0_1	O00303	ENSG00000175390	eukaryotic translation initiation factor 3, subunit F	EIF3F	Expressed in all tissues
dd_Smed_v6_16428_0_1	Q08AI6	ENSG00000169507	solute carrier family 38, member 11	SLC38A11	Tissue enhanced	gallbladder
dd_Smed_v6_1644_0_1	Q49A17	ENSG00000174473	UDP-N-acetyl-alpha-D-galactosamine:polypeptide N-acetylgalactosaminyltransferase-like 6	GALNTL6	Tissue enhanced	brain, testis
dd_Smed_v6_1645_0_1	Q9HD42	ENSG00000131165	charged multivesicular body protein 1A	CHMP1A	Expressed in all tissues
dd_Smed_v6_16466_0_1	P55316	ENSG00000176165	forkhead box G1	FOXG1	Group enriched	brain,testis
dd_Smed_v6_16472_0_1	Q9UBC0	ENSG00000169856	one cut homeobox 1	ONECUT1	Tissue enhanced	gallbladder, liver, pancreas
dd_Smed_v6_1648_0_1	Q709C8	ENSG00000129003	vacuolar protein sorting 13 homolog C (S. cerevisiae)	VPS13C	Expressed in all tissues
dd_Smed_v6_1651_0_1	P23921	ENSG00000167325	ribonucleotide reductase M1	RRM1	Expressed in all tissues
dd_Smed_v6_16528_0_1	Q8IWF9	ENSG00000150676	coiled-coil domain containing 83	CCDC83	Tissue enriched	testis
dd_Smed_v6_1653_0_1	Q9Y617	ENSG00000135069	phosphoserine aminotransferase 1	PSAT1	Tissue enhanced	liver
dd_Smed_v6_1655_0_1	Q96N76	ENSG00000159650	urocanate hydratase 1	UROC1	Tissue enriched	liver
dd_Smed_v6_1656_0_1	P09471	ENSG00000087258	guanine nucleotide binding protein (G protein), alpha activating activity polypeptide O	GNAO1	Tissue enriched	brain
dd_Smed_v6_1657_0_1	P43307	ENSG00000124783	signal sequence receptor, alpha	SSR1	Expressed in all tissues
dd_Smed_v6_16571_0_1	Q9H461	ENSG00000177283	frizzled family receptor 8	FZD8	Mixed
dd_Smed_v6_16577_0_1	Q8NBS3	ENSG00000088836	solute carrier family 4, sodium borate transporter, member 11	SLC4A11	Tissue enhanced	salivary gland, thyroid gland
dd_Smed_v6_1658_0_1	Q5VW32	ENSG00000162819	BRO1 domain and CAAX motif containing	BROX	Expressed in all tissues
dd_Smed_v6_1661_0_1	O14880	ENSG00000143198	microsomal glutathione S-transferase 3	MGST3	Expressed in all tissues
dd_Smed_v6_1662_0_1	Q9BXI2	ENSG00000120329	solute carrier family 25 (mitochondrial carrier; ornithine transporter) member 2	SLC25A2	Tissue enriched	testis
dd_Smed_v6_16638_0_1	Q9BX63	ENSG00000136492	BRCA1 interacting protein C-terminal helicase 1	BRIP1	Tissue enhanced	testis
dd_Smed_v6_16646_0_1	P17542	ENSG00000162367	T-cell acute lymphocytic leukemia 1	TAL1	Tissue enhanced	bone marrow
dd_Smed_v6_1666_0_1	Q99523	ENSG00000134243	sortilin 1	SORT1	Expressed in all tissues
dd_Smed_v6_1667_0_1	Q9Y3E7	ENSG00000115561	charged multivesicular body protein 3	CHMP3	Expressed in all tissues
dd_Smed_v6_1668_0_1	Q9Y262	ENSG00000100129	eukaryotic translation initiation factor 3, subunit L	EIF3L	Expressed in all tissues
dd_Smed_v6_1669_0_1	P28070	ENSG00000159377	proteasome (prosome, macropain) subunit, beta type, 4	PSMB4	Expressed in all tissues
dd_Smed_v6_167_0_1	P50914	ENSG00000188846	ribosomal protein L14	RPL14	Expressed in all tissues
dd_Smed_v6_1670_0_1	Q9NXR1	ENSG00000072864	nudE neurodevelopment protein 1	NDE1	Expressed in all tissues
dd_Smed_v6_1672_0_1	Q9Y5K5	ENSG00000116750	ubiquitin carboxyl-terminal hydrolase L5	UCHL5	Expressed in all tissues
dd_Smed_v6_16724_0_1	O43502	ENSG00000108384	RAD51 paralog C	RAD51C	Expressed in all tissues
dd_Smed_v6_1673_0_1	P09327	ENSG00000127831	villin 1	VIL1	Group enriched	colon,duodenum,rectum,small intestine
dd_Smed_v6_16749_0_1	Q6UW02	ENSG00000119004	cytochrome P450, family 20, subfamily A, polypeptide 1	CYP20A1	Expressed in all tissues
dd_Smed_v6_16753_0_1	Q8WZ82	ENSG00000262664	ovarian tumor suppressor candidate 2	OVCA2	Expressed in all tissues
dd_Smed_v6_16759_0_1	Q9Y2I6	ENSG00000101004	ninein-like	NINL	Mixed
dd_Smed_v6_16760_0_1	P54278	ENSG00000122512	PMS2 postmeiotic segregation increased 2 (S. cerevisiae)	PMS2	Expressed in all tissues
dd_Smed_v6_1677_0_1	Q14671	ENSG00000134644	pumilio RNA-binding family member 1	PUM1	Expressed in all tissues
dd_Smed_v6_1680_0_1	P43353	ENSG00000006534	aldehyde dehydrogenase 3 family, member B1	ALDH3B1	Mixed
dd_Smed_v6_16802_0_1	P56282	ENSG00000100479	polymerase (DNA directed), epsilon 2, accessory subunit	POLE2	Mixed
dd_Smed_v6_1682_0_1	Q99714	ENSG00000072506	hydroxysteroid (17-beta) dehydrogenase 10	HSD17B10	Expressed in all tissues
dd_Smed_v6_16835_0_1	Q8N4L8	ENSG00000159214	coiled-coil domain containing 24	CCDC24	Mixed
dd_Smed_v6_16842_0_1	Q9H611	ENSG00000140451	PIF1 5'-to-3' DNA helicase	PIF1	Mixed
dd_Smed_v6_16848_0_1	Q99613	ENSG00000184110	eukaryotic translation initiation factor 3, subunit C	EIF3C	Expressed in all tissues
dd_Smed_v6_1685_0_1	Q92542	ENSG00000162736	nicastrin	NCSTN	Expressed in all tissues
dd_Smed_v6_16856_0_1	Q6ZR37	ENSG00000187510	pleckstrin homology domain containing, family G (with RhoGef domain) member 7	PLEKHG7	Tissue enhanced	fallopian tube
dd_Smed_v6_1686_0_1	Q99816	ENSG00000074319	tumor susceptibility 101	TSG101	Expressed in all tissues
dd_Smed_v6_1690_0_1	Q9BRF8	ENSG00000103381	calcineurin-like phosphoesterase domain containing 1	CPPED1	Expressed in all tissues
dd_Smed_v6_1692_0_1	P82675	ENSG00000144029	mitochondrial ribosomal protein S5	MRPS5	Expressed in all tissues
dd_Smed_v6_16928_0_1	P29323	ENSG00000133216	EPH receptor B2	EPHB2	Mixed
dd_Smed_v6_1694_0_1	Q14541	ENSG00000164749	hepatocyte nuclear factor 4, gamma	HNF4G	Tissue enhanced	duodenum, small intestine
dd_Smed_v6_16942_0_1	O75419	ENSG00000093009	cell division cycle 45	CDC45	Tissue enhanced	testis
dd_Smed_v6_1695_0_1	O75494	ENSG00000188529	serine/arginine-rich splicing factor 10	SRSF10	Expressed in all tissues
dd_Smed_v6_16950_0_1	Q96MF6	ENSG00000135469	coenzyme Q10 homolog A (S. cerevisiae)	COQ10A	Group enriched	adrenal gland,heart muscle,skeletal muscle
dd_Smed_v6_16955_0_1	Q9H161	ENSG00000052850	ALX homeobox 4	ALX4	Tissue enhanced	prostate
dd_Smed_v6_1696_0_1	Q9Y2S2	ENSG00000165475	crystallin, lambda 1	CRYL1	Expressed in all tissues
dd_Smed_v6_16975_0_1	Q8NB25	ENSG00000111879	family with sequence similarity 184, member A	FAM184A	Tissue enhanced	testis
dd_Smed_v6_170_0_1	P62249	ENSG00000105193	ribosomal protein S16	RPS16	Expressed in all tissues
dd_Smed_v6_1701_0_1	Q96H20	ENSG00000159210	SNF8, ESCRT-II complex subunit	SNF8	Expressed in all tissues
dd_Smed_v6_17019_0_1	Q9Y5E7	ENSG00000112852	protocadherin beta 2	PCDHB2	Tissue enhanced	testis
dd_Smed_v6_17021_0_1	P51170	ENSG00000166828	sodium channel, non-voltage-gated 1, gamma subunit	SCNN1G	Tissue enhanced	kidney
dd_Smed_v6_1703_0_1	O43708	ENSG00000100577	glutathione S-transferase zeta 1	GSTZ1	Expressed in all tissues
dd_Smed_v6_17034_0_1	Q14679	ENSG00000135912	tubulin tyrosine ligase-like family, member 4	TTLL4	Expressed in all tissues
dd_Smed_v6_17053_0_1	Q9UBV7	ENSG00000027847	xylosylprotein beta 1,4-galactosyltransferase, polypeptide 7	B4GALT7	Expressed in all tissues
dd_Smed_v6_1707_0_1	Q14697	ENSG00000089597	glucosidase, alpha; neutral AB	GANAB	Expressed in all tissues
dd_Smed_v6_17079_0_1	Q9C0D2	ENSG00000166004	KIAA1731	KIAA1731	Expressed in all tissues
dd_Smed_v6_17087_0_1	P27105	ENSG00000148175	stomatin	STOM	Expressed in all tissues
dd_Smed_v6_1709_0_1	P09467	ENSG00000165140	fructose-1,6-bisphosphatase 1	FBP1	Tissue enhanced	liver
dd_Smed_v6_171_0_1	P08865	ENSG00000168028	ribosomal protein SA	RPSA	Expressed in all tissues
dd_Smed_v6_1710_0_1	P62072	ENSG00000134809	translocase of inner mitochondrial membrane 10 homolog (yeast)	TIMM10	Expressed in all tissues
dd_Smed_v6_1711_0_1	P47897	ENSG00000172053	glutaminyl-tRNA synthetase	QARS	Expressed in all tissues
dd_Smed_v6_1712_0_1	P61009	ENSG00000129128	signal peptidase complex subunit 3 homolog (S. cerevisiae)	SPCS3	Expressed in all tissues
dd_Smed_v6_17120_0_1	P34981	ENSG00000174417	thyrotropin-releasing hormone receptor	TRHR	Not detected
dd_Smed_v6_17162_0_1	Q92772	ENSG00000138769	cyclin-dependent kinase-like 2 (CDC2-related kinase)	CDKL2	Tissue enhanced	testis
dd_Smed_v6_1717_0_1	O43236	ENSG00000108387	septin 4	2018-09-04	Tissue enhanced	adrenal gland, brain
dd_Smed_v6_1719_0_1	O75954	ENSG00000011105	tetraspanin 9	TSPAN9	Tissue enhanced	heart muscle
dd_Smed_v6_17198_0_1	Q5SNT2	ENSG00000188807	transmembrane protein 201	TMEM201	Mixed
dd_Smed_v6_172_0_1	P83731	ENSG00000114391	ribosomal protein L24	RPL24	Expressed in all tissues
dd_Smed_v6_172_1_1	Q9HCP0	ENSG00000169118	casein kinase 1, gamma 1	CSNK1G1	Mixed
dd_Smed_v6_1720_0_1	Q9Y3D7	ENSG00000217930	presequence translocase-associated motor 16 homolog (S. cerevisiae)	PAM16	Expressed in all tissues
dd_Smed_v6_17216_0_1	Q86UN6	ENSG00000186471	A kinase (PRKA) anchor protein 14	AKAP14	Group enriched	fallopian tube,testis
dd_Smed_v6_17219_0_1	Q5T1B0	ENSG00000162779	axonemal dynein light chain domain containing 1	AXDND1	Tissue enhanced	testis
dd_Smed_v6_1726_0_1	Q9NR71	ENSG00000188611	N-acylsphingosine amidohydrolase (non-lysosomal ceramidase) 2	ASAH2	Group enriched	duodenum,small intestine
dd_Smed_v6_17265_0_1	Q9UHB4	ENSG00000188566	NADPH dependent diflavin oxidoreductase 1	NDOR1	Mixed
dd_Smed_v6_1727_0_1	Q9UBQ0	ENSG00000111237	vacuolar protein sorting 29 homolog (S. cerevisiae)	VPS29	Expressed in all tissues
dd_Smed_v6_1729_0_1	O95182	ENSG00000267855	NADH dehydrogenase (ubiquinone) 1 alpha subcomplex, 7, 14.5kDa	NDUFA7	Expressed in all tissues
dd_Smed_v6_1730_0_1	P14314	ENSG00000130175	protein kinase C substrate 80K-H	PRKCSH	Expressed in all tissues
dd_Smed_v6_17304_0_1	Q6ZN17	ENSG00000187772	lin-28 homolog B (C. elegans)	LIN28B	Tissue enriched	placenta
dd_Smed_v6_17308_0_1	Q9P202	ENSG00000095397	deafness, autosomal recessive 31	DFNB31	Tissue enhanced	adrenal gland
dd_Smed_v6_1731_0_1	Q15043	ENSG00000104635	solute carrier family 39 (zinc transporter), member 14	SLC39A14	Mixed
dd_Smed_v6_17324_0_1	P20265	ENSG00000184486	POU class 3 homeobox 2	POU3F2	Tissue enriched	brain
dd_Smed_v6_1733_0_1	Q9H0W9	ENSG00000182919	chromosome 11 open reading frame 54	C11orf54	Expressed in all tissues
dd_Smed_v6_17332_0_1	Q5TA89	ENSG00000197921	hes family bHLH transcription factor 5	HES5	Tissue enhanced	brain, skin
dd_Smed_v6_17337_0_1	Q8WUY3	ENSG00000106772	prune homolog 2 (Drosophila)	PRUNE2	Expressed in all tissues
dd_Smed_v6_1734_0_1	Q9NQR4	ENSG00000114021	nitrilase family, member 2	NIT2	Expressed in all tissues
dd_Smed_v6_1736_0_1	Q5TGI0	ENSG00000146267	failed axon connections homolog (Drosophila)	FAXC	Mixed
dd_Smed_v6_1738_0_1	Q9BXP2	ENSG00000146828	solute carrier family 12, member 9	SLC12A9	Expressed in all tissues
dd_Smed_v6_17385_0_1	Q02447	ENSG00000172845	Sp3 transcription factor	SP3	Expressed in all tissues
dd_Smed_v6_1739_0_1	O75083	ENSG00000071127	WD repeat domain 1	WDR1	Expressed in all tissues
dd_Smed_v6_17398_0_1	Q8NA72	ENSG00000152359	POC5 centriolar protein	POC5	Expressed in all tissues
dd_Smed_v6_174_0_1	P63244	ENSG00000204628	guanine nucleotide binding protein (G protein), beta polypeptide 2-like 1	GNB2L1	Expressed in all tissues
dd_Smed_v6_1740_0_1	Q15629	ENSG00000067167	translocation associated membrane protein 1	TRAM1	Expressed in all tissues
dd_Smed_v6_17402_0_1	P18075	ENSG00000101144	bone morphogenetic protein 7	BMP7	Tissue enhanced	thyroid gland
dd_Smed_v6_1742_0_1	P15259	ENSG00000164708	phosphoglycerate mutase 2 (muscle)	PGAM2	Group enriched	heart muscle,skeletal muscle
dd_Smed_v6_1743_0_1	Q6Y1H2	ENSG00000206527	protein tyrosine phosphatase-like (proline instead of catalytic arginine), member b	PTPLB	Expressed in all tissues
dd_Smed_v6_1744_0_1	Q8NE62	ENSG00000016391	choline dehydrogenase	CHDH	Tissue enhanced	kidney
dd_Smed_v6_17462_0_1	Q6P6B7	ENSG00000134461	ankyrin repeat domain 16	ANKRD16	Expressed in all tissues
dd_Smed_v6_17498_0_1	Q96JN0	ENSG00000196233	ligand dependent nuclear receptor corepressor	LCOR	Expressed in all tissues
dd_Smed_v6_175_0_1	O60911	ENSG00000136943	cathepsin V	CTSV	Group enriched	esophagus,kidney,placenta,skin,testis
dd_Smed_v6_17501_0_1	Q9NVV5	ENSG00000146416	androgen-induced 1	AIG1	Expressed in all tissues
dd_Smed_v6_1751_0_1	Q14145	ENSG00000079999	kelch-like ECH-associated protein 1	KEAP1	Expressed in all tissues
dd_Smed_v6_1752_0_1	O14815	ENSG00000135773	calpain 9	CAPN9	Tissue enhanced	rectum, stomach
dd_Smed_v6_17530_0_1	Q6ZWH5	ENSG00000163491	NIMA-related kinase 10	NEK10	Tissue enhanced	fallopian tube, testis
dd_Smed_v6_17534_0_1	P35869	ENSG00000106546	aryl hydrocarbon receptor	AHR	Expressed in all tissues
dd_Smed_v6_1755_0_1	Q99873	ENSG00000126457	protein arginine methyltransferase 1	PRMT1	Expressed in all tissues
dd_Smed_v6_1756_0_1	Q8TC07	ENSG00000121749	TBC1 domain family, member 15	TBC1D15	Expressed in all tissues
dd_Smed_v6_17565_0_1	Q96M20	ENSG00000149646	cyclic nucleotide binding domain containing 2	CNBD2	Tissue enriched	testis
dd_Smed_v6_17566_0_1	Q8NEA6	ENSG00000107249	GLIS family zinc finger 3	GLIS3	Tissue enhanced	thyroid gland
dd_Smed_v6_1758_0_1	Q9H9P8	ENSG00000087299	L-2-hydroxyglutarate dehydrogenase	L2HGDH	Expressed in all tissues
dd_Smed_v6_17586_0_1	Q7Z418	ENSG00000186795	potassium channel, subfamily K, member 18	KCNK18	Not detected
dd_Smed_v6_1759_0_1	P43308	ENSG00000163479	signal sequence receptor, beta (translocon-associated protein beta)	SSR2	Expressed in all tissues
dd_Smed_v6_17598_0_1	P23945	ENSG00000170820	follicle stimulating hormone receptor	FSHR	Group enriched	ovary,testis
dd_Smed_v6_176_0_1	P62987	ENSG00000221983	ubiquitin A-52 residue ribosomal protein fusion product 1	UBA52	Expressed in all tissues
dd_Smed_v6_1760_1_1	Q9P2P1	ENSG00000205978	NYN domain and retroviral integrase containing	NYNRIN	Mixed
dd_Smed_v6_1761_0_1	Q8NE71	ENSG00000204574	ATP-binding cassette, sub-family F (GCN20), member 1	ABCF1	Expressed in all tissues
dd_Smed_v6_17617_0_1	Q8WZA1	ENSG00000085998	protein O-linked mannose N-acetylglucosaminyltransferase 1 (beta 1,2-)	POMGNT1	Expressed in all tissues
dd_Smed_v6_1762_0_1	Q96FZ7	ENSG00000176108	charged multivesicular body protein 6	CHMP6	Expressed in all tissues
dd_Smed_v6_1763_0_1	Q9GZZ1	ENSG00000121579	N(alpha)-acetyltransferase 50, NatE catalytic subunit	NAA50	Expressed in all tissues
dd_Smed_v6_1764_0_1	P53992	ENSG00000176986	SEC24 family member C	SEC24C	Expressed in all tissues
dd_Smed_v6_1766_0_1	P61081	ENSG00000130725	ubiquitin-conjugating enzyme E2M	UBE2M	Expressed in all tissues
dd_Smed_v6_17664_0_1	Q9Y5N5	ENSG00000156239	N-6 adenine-specific DNA methyltransferase 1 (putative)	N6AMT1	Mixed
dd_Smed_v6_1768_1_1	P29508	ENSG00000057149	serpin peptidase inhibitor, clade B (ovalbumin), member 3	SERPINB3	Tissue enriched	esophagus
dd_Smed_v6_1769_0_1	A6ND91	ENSG00000204653	aspartate dehydrogenase domain containing	ASPDH	Tissue enhanced	kidney, liver
dd_Smed_v6_17692_0_1	Q6ZTR5	ENSG00000165164	chromosome X open reading frame 22	CXorf22	Tissue enriched	fallopian tube
dd_Smed_v6_1770_0_1	Q9H4A6	ENSG00000113384	golgi phosphoprotein 3 (coat-protein)	GOLPH3	Expressed in all tissues
dd_Smed_v6_17704_0_1	Q86WJ1	ENSG00000131778	chromodomain helicase DNA binding protein 1-like	CHD1L	Expressed in all tissues
dd_Smed_v6_1771_0_1	P20618	ENSG00000008018	proteasome (prosome, macropain) subunit, beta type, 1	PSMB1	Expressed in all tissues
dd_Smed_v6_1772_0_1	P16615	ENSG00000174437	ATPase, Ca++ transporting, cardiac muscle, slow twitch 2	ATP2A2	Expressed in all tissues
dd_Smed_v6_17726_0_1	P26367	ENSG00000007372	paired box 6	PAX6	Group enriched	brain,pancreas,stomach
dd_Smed_v6_17731_0_1	P81133	ENSG00000112246	single-minded family bHLH transcription factor 1	SIM1	Tissue enriched	kidney
dd_Smed_v6_17743_0_1	Q9P2J2	ENSG00000085552	immunoglobulin superfamily, member 9	IGSF9	Tissue enhanced	skin
dd_Smed_v6_1779_0_1	Q9UBS3	ENSG00000128590	DnaJ (Hsp40) homolog, subfamily B, member 9	DNAJB9	Expressed in all tissues
dd_Smed_v6_178_0_1	P62753	ENSG00000137154	ribosomal protein S6	RPS6	Expressed in all tissues
dd_Smed_v6_17801_0_1	Q9HB89	ENSG00000171596	neuromedin U receptor 1	NMUR1	Mixed
dd_Smed_v6_1781_0_1	Q13045	ENSG00000177731	flightless I homolog (Drosophila)	FLII	Expressed in all tissues
dd_Smed_v6_1784_0_1	A1L0T0	ENSG00000105135	ilvB (bacterial acetolactate synthase)-like	ILVBL	Expressed in all tissues
dd_Smed_v6_17862_0_1	Q9BVC3	ENSG00000136982	DNA replication and sister chromatid cohesion 1	DSCC1	Mixed
dd_Smed_v6_1788_0_1	Q15428	ENSG00000104897	splicing factor 3a, subunit 2, 66kDa	SF3A2	Expressed in all tissues
dd_Smed_v6_17907_0_1	Q4AE62	ENSG00000121964	glycosyltransferase-like domain containing 1	GTDC1	Expressed in all tissues
dd_Smed_v6_1791_0_1	Q96IX5	ENSG00000173915	up-regulated during skeletal muscle growth 5 homolog (mouse)	USMG5	Expressed in all tissues
dd_Smed_v6_17910_0_1	Q13322	ENSG00000106070	growth factor receptor-bound protein 10	GRB10	Expressed in all tissues
dd_Smed_v6_17913_0_1	P57727	ENSG00000160183	transmembrane protease, serine 3	TMPRSS3	Tissue enhanced	fallopian tube, stomach
dd_Smed_v6_1794_0_1	Q86VU5	ENSG00000165644	catechol-O-methyltransferase domain containing 1	COMTD1	Mixed
dd_Smed_v6_1795_0_1	P54577	ENSG00000134684	tyrosyl-tRNA synthetase	YARS	Expressed in all tissues
dd_Smed_v6_17951_0_1	Q8WVJ9	ENSG00000233608	twist family bHLH transcription factor 2	TWIST2	Tissue enhanced	adipose tissue
dd_Smed_v6_1797_0_1	P55145	ENSG00000145050	mesencephalic astrocyte-derived neurotrophic factor	MANF	Expressed in all tissues
dd_Smed_v6_17981_0_1	O94759	ENSG00000142185	transient receptor potential cation channel, subfamily M, member 2	TRPM2	Mixed
dd_Smed_v6_17986_0_1	P23975	ENSG00000103546	solute carrier family 6 (neurotransmitter transporter), member 2	SLC6A2	Group enriched	adrenal gland,endometrium,placenta,skin,testis
dd_Smed_v6_17988_0_1	P04275	ENSG00000110799	von Willebrand factor	VWF	Mixed
dd_Smed_v6_1800_0_1	Q8WYA6	ENSG00000132792	catenin, beta like 1	CTNNBL1	Expressed in all tissues
dd_Smed_v6_18017_0_1	Q9NSV4	ENSG00000139734	diaphanous-related formin 3	DIAPH3	Tissue enhanced	testis
dd_Smed_v6_1803_0_1	Q13489	ENSG00000023445	baculoviral IAP repeat containing 3	BIRC3	Mixed
dd_Smed_v6_18031_0_1	A6NDA9	ENSG00000204033	leucine-rich repeat, immunoglobulin-like and transmembrane domains 2	LRIT2	Tissue enhanced	rectum, skin
dd_Smed_v6_1804_0_1	Q92922	ENSG00000173473	SWI/SNF related, matrix associated, actin dependent regulator of chromatin, subfamily c, member 1	SMARCC1	Expressed in all tissues
dd_Smed_v6_1806_0_1	Q96BX8	ENSG00000172081	MOB kinase activator 3A	MOB3A	Expressed in all tissues
dd_Smed_v6_1807_0_1	Q9NVI7	ENSG00000197785	ATPase family, AAA domain containing 3A	ATAD3A	Expressed in all tissues
dd_Smed_v6_181_0_1	Q8NDH3	ENSG00000215440	aminopeptidase-like 1	NPEPL1	Expressed in all tissues
dd_Smed_v6_18101_0_1	Q9NXL9	ENSG00000111877	minichromosome maintenance complex component 9	MCM9	Expressed in all tissues
dd_Smed_v6_1811_0_1	Q99615	ENSG00000168259	DnaJ (Hsp40) homolog, subfamily C, member 7	DNAJC7	Expressed in all tissues
dd_Smed_v6_1812_0_1	Q8N1G4	ENSG00000130764	leucine rich repeat containing 47	LRRC47	Expressed in all tissues
dd_Smed_v6_1813_0_1	Q92734	ENSG00000114354	TRK-fused gene	TFG	Expressed in all tissues
dd_Smed_v6_18130_0_1	Q3LXA3	ENSG00000149476	dihydroxyacetone kinase 2 homolog (S. cerevisiae)	DAK	Expressed in all tissues
dd_Smed_v6_18133_0_1	Q6PIY5	ENSG00000198520	chromosome 1 open reading frame 228	C1orf228	Tissue enhanced	bone marrow
dd_Smed_v6_18147_0_1	P49640	ENSG00000106038	even-skipped homeobox 1	EVX1	Tissue enhanced	adrenal gland, prostate, testis
dd_Smed_v6_1815_0_1	O43678	ENSG00000131495	NADH dehydrogenase (ubiquinone) 1 alpha subcomplex, 2, 8kDa	NDUFA2	Expressed in all tissues
dd_Smed_v6_1817_0_1	Q9NR19	ENSG00000131069	acyl-CoA synthetase short-chain family member 2	ACSS2	Expressed in all tissues
dd_Smed_v6_18176_0_1	Q6ZPD9	ENSG00000178904	dpy-19-like 3 (C. elegans)	DPY19L3	Mixed
dd_Smed_v6_1818_0_1	O00429	ENSG00000087470	dynamin 1-like	DNM1L	Expressed in all tissues
dd_Smed_v6_1819_0_1	O95721	ENSG00000099940	synaptosomal-associated protein, 29kDa	SNAP29	Expressed in all tissues
dd_Smed_v6_18217_0_1	Q9NRJ4	ENSG00000130338	tubby like protein 4	TULP4	Mixed
dd_Smed_v6_1822_0_1	Q12872	ENSG00000061936	splicing factor, suppressor of white-apricot homolog (Drosophila)	SFSWAP	Expressed in all tissues
dd_Smed_v6_1823_0_1	O43772	ENSG00000178537	solute carrier family 25 (carnitine/acylcarnitine translocase), member 20	SLC25A20	Expressed in all tissues
dd_Smed_v6_18245_0_1	Q9H1B7	ENSG00000119669	interferon regulatory factor 2 binding protein-like	IRF2BPL	Expressed in all tissues
dd_Smed_v6_1825_0_1	A4D2B0	ENSG00000214309	metallo-beta-lactamase domain containing 1	MBLAC1	Mixed
dd_Smed_v6_1826_0_1	P62314	ENSG00000167088	small nuclear ribonucleoprotein D1 polypeptide 16kDa	SNRPD1	Expressed in all tissues
dd_Smed_v6_1827_0_1	Q9Y639	ENSG00000156642	neuroplastin	NPTN	Expressed in all tissues
dd_Smed_v6_1829_0_1	Q9H3U5	ENSG00000118855	major facilitator superfamily domain containing 1	MFSD1	Expressed in all tissues
dd_Smed_v6_1830_0_1	Q9BYG5	ENSG00000124171	par-6 family cell polarity regulator beta	PARD6B	Tissue enhanced	kidney
dd_Smed_v6_18303_0_1	Q96GX5	ENSG00000120539	microtubule associated serine/threonine kinase-like	MASTL	Mixed
dd_Smed_v6_18313_0_1	Q13972	ENSG00000058335	Ras protein-specific guanine nucleotide-releasing factor 1	RASGRF1	Group enriched	brain,lung
dd_Smed_v6_18318_0_1	Q96ES6	ENSG00000167700	major facilitator superfamily domain containing 3	MFSD3	Expressed in all tissues
dd_Smed_v6_1832_0_1	Q9NP79	ENSG00000009844	vesicle (multivesicular body) trafficking 1	VTA1	Expressed in all tissues
dd_Smed_v6_18326_0_1	O95841	ENSG00000116194	angiopoietin-like 1	ANGPTL1	Mixed
dd_Smed_v6_1833_0_1	P23378	ENSG00000178445	glycine dehydrogenase (decarboxylating)	GLDC	Group enriched	brain,kidney,liver,placenta
dd_Smed_v6_1835_0_1	Q8WUW1	ENSG00000254999	BRICK1, SCAR/WAVE actin-nucleating complex subunit	BRK1	Expressed in all tissues
dd_Smed_v6_18373_0_1	Q9BZA8	ENSG00000099715	protocadherin 11 Y-linked	PCDH11Y	Tissue enhanced	brain
dd_Smed_v6_1839_0_1	Q5VTL8	ENSG00000134186	pre-mRNA processing factor 38B	PRPF38B	Expressed in all tissues
dd_Smed_v6_18390_0_1	Q9UMX3	ENSG00000176720	BCL2-related ovarian killer	BOK	Tissue enhanced	adipose tissue
dd_Smed_v6_1840_0_1	Q15904	ENSG00000071553	ATPase, H+ transporting, lysosomal accessory protein 1	ATP6AP1	Expressed in all tissues
dd_Smed_v6_1843_0_1	P49821	ENSG00000167792	NADH dehydrogenase (ubiquinone) flavoprotein 1, 51kDa	NDUFV1	Expressed in all tissues
dd_Smed_v6_18437_0_1	Q8N5S9	ENSG00000004660	calcium/calmodulin-dependent protein kinase kinase 1, alpha	CAMKK1	Tissue enhanced	brain
dd_Smed_v6_18465_0_1	P29279	ENSG00000118523	connective tissue growth factor	CTGF	Expressed in all tissues
dd_Smed_v6_18478_0_1	Q9NRR6	ENSG00000148384	inositol polyphosphate-5-phosphatase, 72 kDa	INPP5E	Expressed in all tissues
dd_Smed_v6_18505_0_1	P28360	ENSG00000163132	msh homeobox 1	MSX1	Tissue enhanced	endometrium
dd_Smed_v6_1854_0_1	Q6XD76	ENSG00000187855	achaete-scute family bHLH transcription factor 4	ASCL4	Not detected
dd_Smed_v6_1855_0_1	P17980	ENSG00000165916	proteasome (prosome, macropain) 26S subunit, ATPase, 3	PSMC3	Expressed in all tissues
dd_Smed_v6_18554_0_1	Q8IY50	ENSG00000183780	solute carrier family 35, member F3	SLC35F3	Tissue enhanced	brain
dd_Smed_v6_1856_0_1	Q9NUQ9	ENSG00000153310	family with sequence similarity 49, member B	FAM49B	Expressed in all tissues
dd_Smed_v6_1858_0_1	P11586	ENSG00000100714	methylenetetrahydrofolate dehydrogenase (NADP+ dependent) 1, methenyltetrahydrofolate cyclohydrolase, formyltetrahydrofolate synthetase	MTHFD1	Expressed in all tissues
dd_Smed_v6_186_0_1	P13639	ENSG00000167658	eukaryotic translation elongation factor 2	EEF2	Expressed in all tissues
dd_Smed_v6_1861_0_1	Q9HD33	ENSG00000136522	mitochondrial ribosomal protein L47	MRPL47	Expressed in all tissues
dd_Smed_v6_18628_0_1	Q9C0B2	ENSG00000142609	chromosome 1 open reading frame 222	C1orf222	Tissue enhanced	fallopian tube, testis
dd_Smed_v6_1863_0_1	Q9UL25	ENSG00000080371	RAB21, member RAS oncogene family	RAB21	Expressed in all tissues
dd_Smed_v6_1865_0_1	Q9H2I8	ENSG00000148655	chromosome 10 open reading frame 11	C10orf11	Expressed in all tissues
dd_Smed_v6_18657_0_1	P18887	ENSG00000073050	X-ray repair complementing defective repair in Chinese hamster cells 1	XRCC1	Expressed in all tissues
dd_Smed_v6_1867_0_1	Q9H1K1	ENSG00000136003	iron-sulfur cluster assembly enzyme	ISCU	Expressed in all tissues
dd_Smed_v6_1869_0_1	Q9ULD0	ENSG00000197444	oxoglutarate dehydrogenase-like	OGDHL	Tissue enhanced	kidney, liver
dd_Smed_v6_18719_0_1	Q9NY43	ENSG00000143032	BarH-like homeobox 2	BARHL2	Tissue enriched	testis
dd_Smed_v6_1872_0_1	Q9BXP5	ENSG00000087087	serrate RNA effector molecule homolog (Arabidopsis)	SRRT	Expressed in all tissues
dd_Smed_v6_1873_0_1	O15027	ENSG00000148396	SEC16 homolog A (S. cerevisiae)	SEC16A	Expressed in all tissues
dd_Smed_v6_1874_0_1	Q9NRA2	ENSG00000119899	solute carrier family 17 (acidic sugar transporter), member 5	SLC17A5	Expressed in all tissues
dd_Smed_v6_1878_0_1	Q16718	ENSG00000128609	NADH dehydrogenase (ubiquinone) 1 alpha subcomplex, 5	NDUFA5	Expressed in all tissues
dd_Smed_v6_1879_0_1	Q96RP9	ENSG00000168827	G elongation factor, mitochondrial 1	GFM1	Expressed in all tissues
dd_Smed_v6_1880_0_1	Q14165	ENSG00000110917	malectin	MLEC	Expressed in all tissues
dd_Smed_v6_1882_0_1	Q9UBD6	ENSG00000140519	Rh family, C glycoprotein	RHCG	Group enriched	esophagus,tonsil
dd_Smed_v6_1883_0_1	P62312	ENSG00000164167	LSM6 homolog, U6 small nuclear RNA associated (S. cerevisiae)	LSM6	Expressed in all tissues
dd_Smed_v6_1884_1_1	Q68CP4	ENSG00000165102	heparan-alpha-glucosaminide N-acetyltransferase	HGSNAT	Expressed in all tissues
dd_Smed_v6_1885_0_1	Q659C4	ENSG00000138709	La ribonucleoprotein domain family, member 1B	LARP1B	Expressed in all tissues
dd_Smed_v6_1889_0_1	P13804	ENSG00000140374	electron-transfer-flavoprotein, alpha polypeptide	ETFA	Expressed in all tissues
dd_Smed_v6_189_0_1	P46778	ENSG00000122026	ribosomal protein L21	RPL21	Expressed in all tissues
dd_Smed_v6_1892_0_1	Q86X95	ENSG00000138433	corepressor interacting with RBPJ, 1	CIR1	Expressed in all tissues
dd_Smed_v6_1894_0_1	Q8IV08	ENSG00000105223	phospholipase D family, member 3	PLD3	Expressed in all tissues
dd_Smed_v6_18940_0_1	Q5T0B9	ENSG00000160094	zinc finger protein 362	ZNF362	Expressed in all tissues
dd_Smed_v6_18947_0_1	Q01954	ENSG00000169594	basonuclin 1	BNC1	Group enriched	esophagus,skin,testis
dd_Smed_v6_1895_0_1	P52758	ENSG00000132541	heat-responsive protein 12	HRSP12	Group enriched	kidney,liver
dd_Smed_v6_18952_0_1	Q9NQ03	ENSG00000215397	scratch family zinc finger 2	SCRT2	Not detected
dd_Smed_v6_1896_0_1	P04181	ENSG00000065154	ornithine aminotransferase	OAT	Expressed in all tissues
dd_Smed_v6_1900_0_1	Q9UK58	ENSG00000163660	cyclin L1	CCNL1	Tissue enriched	bone marrow
dd_Smed_v6_1901_0_1	O75380	ENSG00000145494	NADH dehydrogenase (ubiquinone) Fe-S protein 6, 13kDa (NADH-coenzyme Q reductase)	NDUFS6	Expressed in all tissues
dd_Smed_v6_19035_0_1	Q53H47	ENSG00000170364	SET domain and mariner transposase fusion gene	SETMAR	Expressed in all tissues
dd_Smed_v6_1904_0_1	Q8NCC5	ENSG00000157800	solute carrier family 37, member 3	SLC37A3	Expressed in all tissues
dd_Smed_v6_19040_0_1	P56179	ENSG00000006377	distal-less homeobox 6	DLX6	Group enriched	endometrium,placenta,testis
dd_Smed_v6_1905_0_1	O96000	ENSG00000140990	NADH dehydrogenase (ubiquinone) 1 beta subcomplex, 10, 22kDa	NDUFB10	Expressed in all tissues
dd_Smed_v6_1907_0_1	O14494	ENSG00000067113	phosphatidic acid phosphatase type 2A	PPAP2A	Mixed
dd_Smed_v6_19076_0_1	Q9P278	ENSG00000052795	folliculin interacting protein 2	FNIP2	Expressed in all tissues
dd_Smed_v6_1908_0_1	P63302	ENSG00000178980	selenoprotein W, 1	SEPW1	Expressed in all tissues
dd_Smed_v6_1909_0_1	Q9UQ13	ENSG00000108061	soc-2 suppressor of clear homolog (C. elegans)	SHOC2	Expressed in all tissues
dd_Smed_v6_1909_1_1	O75400	ENSG00000196504	PRP40 pre-mRNA processing factor 40 homolog A (S. cerevisiae)	PRPF40A	Expressed in all tissues
dd_Smed_v6_1911_0_1	Q9UGV2	ENSG00000101079	NDRG family member 3	NDRG3	Expressed in all tissues
dd_Smed_v6_1913_0_1	Q9UNM6	ENSG00000185627	proteasome (prosome, macropain) 26S subunit, non-ATPase, 13	PSMD13	Expressed in all tissues
dd_Smed_v6_19148_0_1	O75072	ENSG00000106692	fukutin	FKTN	Expressed in all tissues
dd_Smed_v6_1915_0_1	Q9NT62	ENSG00000144848	autophagy related 3	ATG3	Expressed in all tissues
dd_Smed_v6_1917_0_1	Q9UHP6	ENSG00000100218	rhabdoid tumor deletion region gene 1	RTDR1	Tissue enhanced	fallopian tube, testis
dd_Smed_v6_19176_0_1	Q96QF7	ENSG00000147174	acidic repeat containing	ACRC	Tissue enhanced	testis
dd_Smed_v6_1918_0_1	P49903	ENSG00000086475	selenophosphate synthetase 1	SEPHS1	Expressed in all tissues
dd_Smed_v6_19180_0_1	P35858	ENSG00000099769	insulin-like growth factor binding protein, acid labile subunit	IGFALS	Group enriched	liver,stomach
dd_Smed_v6_1920_0_1	P12004	ENSG00000132646	proliferating cell nuclear antigen	PCNA	Expressed in all tissues
dd_Smed_v6_1921_0_1	Q02790	ENSG00000004478	FK506 binding protein 4, 59kDa	FKBP4	Expressed in all tissues
dd_Smed_v6_1922_0_1	Q96EE3	ENSG00000085415	SEH1-like (S. cerevisiae)	SEH1L	Expressed in all tissues
dd_Smed_v6_1923_0_1	Q13485	ENSG00000141646	SMAD family member 4	SMAD4	Expressed in all tissues
dd_Smed_v6_19236_0_1	Q9Y5F2	ENSG00000197479	protocadherin beta 11	PCDHB11	Mixed
dd_Smed_v6_1924_0_1	Q96C86	ENSG00000110063	decapping enzyme, scavenger	DCPS	Expressed in all tissues
dd_Smed_v6_19255_0_1	Q12951	ENSG00000168269	forkhead box I1	FOXI1	Tissue enhanced	kidney, salivary gland
dd_Smed_v6_19257_0_1	Q9UNS1	ENSG00000111602	timeless circadian clock	TIMELESS	Expressed in all tissues
dd_Smed_v6_1927_0_1	Q96CS7	ENSG00000115762	pleckstrin homology domain containing, family B (evectins) member 2	PLEKHB2	Expressed in all tissues
dd_Smed_v6_1928_0_1	P55769	ENSG00000100138	NHP2 non-histone chromosome protein 2-like 1 (S. cerevisiae)	NHP2L1	Expressed in all tissues
dd_Smed_v6_19286_0_1	P58304	ENSG00000119614	visual system homeobox 2	VSX2	Not detected
dd_Smed_v6_1929_0_1	Q9ULW3	ENSG00000146109	activator of basal transcription 1	ABT1	Expressed in all tissues
dd_Smed_v6_19290_0_1	P03905	ENSG00000198886	mitochondrially encoded NADH dehydrogenase 4	MT-ND4	Expressed in all tissues
dd_Smed_v6_193_0_1	P61313	ENSG00000174748	ribosomal protein L15	RPL15	Expressed in all tissues
dd_Smed_v6_1930_0_1	P61221	ENSG00000164163	ATP-binding cassette, sub-family E (OABP), member 1	ABCE1	Expressed in all tissues
dd_Smed_v6_1932_0_1	Q14498	ENSG00000131051	RNA binding motif protein 39	RBM39	Expressed in all tissues
dd_Smed_v6_19326_0_1	Q5XKR4	ENSG00000171540	orthopedia homeobox	OTP	Not detected
dd_Smed_v6_19327_0_1	Q15270	ENSG00000235608	NK1 homeobox 1	NKX1-1	Not detected
dd_Smed_v6_1934_0_1	A8MQ27	ENSG00000214357	neuralized E3 ubiquitin protein ligase 1B	NEURL1B	Mixed
dd_Smed_v6_1935_0_1	Q8WXA9	ENSG00000153914	splicing regulatory glutamine/lysine-rich protein 1	SREK1	Expressed in all tissues
dd_Smed_v6_1937_0_1	Q9H0E2	ENSG00000078902	toll interacting protein	TOLLIP	Expressed in all tissues
dd_Smed_v6_1939_0_1	P23434	ENSG00000140905	glycine cleavage system protein H (aminomethyl carrier)	GCSH	Expressed in all tissues
dd_Smed_v6_194_0_1	M0QZD8	ENSG00000188897	Protein LOC388210	CTD-3088G3.8	Tissue enhanced	appendix
dd_Smed_v6_1942_0_1	O00754	ENSG00000104774	mannosidase, alpha, class 2B, member 1	MAN2B1	Expressed in all tissues
dd_Smed_v6_1944_0_1	Q8TCB7	ENSG00000206562	methyltransferase like 6	METTL6	Expressed in all tissues
dd_Smed_v6_1945_0_1	Q92620	ENSG00000140829	DEAH (Asp-Glu-Ala-His) box polypeptide 38	DHX38	Expressed in all tissues
dd_Smed_v6_1946_0_1	Q9H0R3	ENSG00000186501	transmembrane protein 222	TMEM222	Expressed in all tissues
dd_Smed_v6_19468_0_1	P30874	ENSG00000180616	somatostatin receptor 2	SSTR2	Tissue enhanced	brain
dd_Smed_v6_1947_0_1	Q96C23	ENSG00000143891	galactose mutarotase (aldose 1-epimerase)	GALM	Expressed in all tissues
dd_Smed_v6_195_0_1	P08708	ENSG00000184779	ribosomal protein S17	RPS17	Expressed in all tissues
dd_Smed_v6_1950_0_1	P23025	ENSG00000136936	xeroderma pigmentosum, complementation group A	XPA	Expressed in all tissues
dd_Smed_v6_1951_0_1	O43707	ENSG00000130402	actinin, alpha 4	ACTN4	Expressed in all tissues
dd_Smed_v6_1953_0_1	O00506	ENSG00000115694	serine/threonine kinase 25	STK25	Expressed in all tissues
dd_Smed_v6_1956_0_1	O14579	ENSG00000105669	coatomer protein complex, subunit epsilon	COPE	Expressed in all tissues
dd_Smed_v6_1957_0_1	P52597	ENSG00000169813	heterogeneous nuclear ribonucleoprotein F	HNRNPF	Expressed in all tissues
dd_Smed_v6_1958_0_1	Q86V88	ENSG00000213920	magnesium-dependent phosphatase 1	MDP1	Expressed in all tissues
dd_Smed_v6_196_0_1	P35558	ENSG00000124253	phosphoenolpyruvate carboxykinase 1 (soluble)	PCK1	Tissue enhanced	kidney, liver
dd_Smed_v6_1961_0_1	P48444	ENSG00000095139	archain 1	ARCN1	Expressed in all tissues
dd_Smed_v6_1962_0_1	A6NLP5	ENSG00000172425	tetratricopeptide repeat domain 36	TTC36	Tissue enriched	liver
dd_Smed_v6_1963_0_1	Q12824	ENSG00000099956	SWI/SNF related, matrix associated, actin dependent regulator of chromatin, subfamily b, member 1	SMARCB1	Expressed in all tissues
dd_Smed_v6_19631_0_1	P49407	ENSG00000137486	arrestin, beta 1	ARRB1	Expressed in all tissues
dd_Smed_v6_1964_0_1	O15305	ENSG00000140650	phosphomannomutase 2	PMM2	Expressed in all tissues
dd_Smed_v6_1965_0_1	P24928	ENSG00000181222	polymerase (RNA) II (DNA directed) polypeptide A, 220kDa	POLR2A	Expressed in all tissues
dd_Smed_v6_1966_0_1	Q7L4I2	ENSG00000111011	arginine/serine-rich coiled-coil 2	RSRC2	Expressed in all tissues
dd_Smed_v6_1972_0_1	Q14164	ENSG00000143466	inhibitor of kappa light polypeptide gene enhancer in B-cells, kinase epsilon	IKBKE	Mixed
dd_Smed_v6_19744_0_1	Q05940	ENSG00000165646	solute carrier family 18 (vesicular monoamine transporter), member 2	SLC18A2	Expressed in all tissues
dd_Smed_v6_1976_0_1	P61421	ENSG00000159720	ATPase, H+ transporting, lysosomal 38kDa, V0 subunit d1	ATP6V0D1	Expressed in all tissues
dd_Smed_v6_1978_0_1	Q13367	ENSG00000103723	adaptor-related protein complex 3, beta 2 subunit	AP3B2	Tissue enhanced	brain
dd_Smed_v6_1979_0_1	O60925	ENSG00000113068	prefoldin subunit 1	PFDN1	Expressed in all tissues
dd_Smed_v6_198_0_1	Q9UNI1	ENSG00000139610	chymotrypsin-like elastase family, member 1	CELA1	Group enriched	adrenal gland,pancreas
dd_Smed_v6_1980_0_1	P53621	ENSG00000122218	coatomer protein complex, subunit alpha	COPA	Expressed in all tissues
dd_Smed_v6_1982_0_1	Q9Y2X3	ENSG00000055044	NOP58 ribonucleoprotein	NOP58	Expressed in all tissues
dd_Smed_v6_19827_0_1	Q86TI4	ENSG00000187260	WD repeat domain 86	WDR86	Tissue enhanced	spleen
dd_Smed_v6_1983_0_1	Q4VC31	ENSG00000160124	coiled-coil domain containing 58	CCDC58	Expressed in all tissues
dd_Smed_v6_19858_0_1	Q96FC9	ENSG00000013573	DEAD/H (Asp-Glu-Ala-Asp/His) box helicase 11	DDX11	Expressed in all tissues
dd_Smed_v6_19859_0_1	O75626	ENSG00000057657	PR domain containing 1, with ZNF domain	PRDM1	Mixed
dd_Smed_v6_1986_0_1	P31948	ENSG00000168439	stress-induced-phosphoprotein 1	STIP1	Expressed in all tissues
dd_Smed_v6_1987_0_1	O00401	ENSG00000106299	Wiskott-Aldrich syndrome-like	WASL	Expressed in all tissues
dd_Smed_v6_1988_0_1	Q9H4G4	ENSG00000122694	GLI pathogenesis-related 2	GLIPR2	Expressed in all tissues
dd_Smed_v6_1989_0_1	P48729	ENSG00000113712	casein kinase 1, alpha 1	CSNK1A1	Expressed in all tissues
dd_Smed_v6_19890_0_1	Q9UMR3	ENSG00000164532	T-box 20	TBX20	Tissue enriched	heart muscle
dd_Smed_v6_1991_0_1	Q13114	ENSG00000131323	TNF receptor-associated factor 3	TRAF3	Expressed in all tissues
dd_Smed_v6_1992_0_1	Q9NXA8	ENSG00000124523	sirtuin 5	SIRT5	Expressed in all tissues
dd_Smed_v6_1993_0_1	P82921	ENSG00000187145	mitochondrial ribosomal protein S21	MRPS21	Expressed in all tissues
dd_Smed_v6_1996_0_1	Q09666	ENSG00000124942	AHNAK nucleoprotein	AHNAK	Expressed in all tissues
dd_Smed_v6_1997_0_1	Q9UBN7	ENSG00000094631	histone deacetylase 6	HDAC6	Expressed in all tissues
dd_Smed_v6_200_0_1	P61353	ENSG00000131469	ribosomal protein L27	RPL27	Expressed in all tissues
dd_Smed_v6_2002_0_1	P36551	ENSG00000080819	coproporphyrinogen oxidase	CPOX	Expressed in all tissues
dd_Smed_v6_2004_0_1	P17174	ENSG00000120053	glutamic-oxaloacetic transaminase 1, soluble	GOT1	Expressed in all tissues
dd_Smed_v6_20043_0_1	P20309	ENSG00000133019	cholinergic receptor, muscarinic 3	CHRM3	Tissue enhanced	salivary gland
dd_Smed_v6_2005_0_1	Q9UKF6	ENSG00000119203	cleavage and polyadenylation specific factor 3, 73kDa	CPSF3	Expressed in all tissues
dd_Smed_v6_2006_0_1	P53990	ENSG00000182149	increased sodium tolerance 1 homolog (yeast)	IST1	Expressed in all tissues
dd_Smed_v6_20066_0_1	Q8WXS5	ENSG00000142408	calcium channel, voltage-dependent, gamma subunit 8	CACNG8	Tissue enriched	brain
dd_Smed_v6_2007_0_1	P28074	ENSG00000100804	proteasome (prosome, macropain) subunit, beta type, 5	PSMB5	Expressed in all tissues
dd_Smed_v6_2009_0_1	Q9UKU0	ENSG00000164398	acyl-CoA synthetase long-chain family member 6	ACSL6	Tissue enhanced	brain, testis
dd_Smed_v6_20096_0_1	P19622	ENSG00000164778	engrailed homeobox 2	EN2	Not detected
dd_Smed_v6_201_0_1	P62841	ENSG00000115268	ribosomal protein S15	RPS15	Expressed in all tissues
dd_Smed_v6_2011_0_1	Q8IUS5	ENSG00000172031	epoxide hydrolase 4	EPHX4	Tissue enhanced	brain
dd_Smed_v6_20110_0_1	Q12791	ENSG00000156113	potassium large conductance calcium-activated channel, subfamily M, alpha member 1	KCNMA1	Tissue enhanced	smooth muscle
dd_Smed_v6_2012_0_1	Q9Y6G5	ENSG00000145781	COMM domain containing 10	COMMD10	Expressed in all tissues
dd_Smed_v6_20152_0_1	Q5TBB1	ENSG00000136104	ribonuclease H2, subunit B	RNASEH2B	Expressed in all tissues
dd_Smed_v6_2016_0_1	Q14739	ENSG00000143815	lamin B receptor	LBR	Expressed in all tissues
dd_Smed_v6_2017_0_1	P05107	ENSG00000160255	integrin, beta 2 (complement component 3 receptor 3 and 4 subunit)	ITGB2	Expressed in all tissues
dd_Smed_v6_202_0_1	P39019	ENSG00000105372	ribosomal protein S19	RPS19	Expressed in all tissues
dd_Smed_v6_2020_0_1	Q9NSD9	ENSG00000116120	phenylalanyl-tRNA synthetase, beta subunit	FARSB	Expressed in all tissues
dd_Smed_v6_2022_0_1	Q8NF37	ENSG00000153395	lysophosphatidylcholine acyltransferase 1	LPCAT1	Expressed in all tissues
dd_Smed_v6_2023_0_1	Q9BWJ5	ENSG00000169976	splicing factor 3b, subunit 5, 10kDa	SF3B5	Expressed in all tissues
dd_Smed_v6_2024_0_1	P13284	ENSG00000216490	interferon, gamma-inducible protein 30	IFI30	Expressed in all tissues
dd_Smed_v6_2025_0_1	Q96FV3	ENSG00000048140	tetraspanin 17	TSPAN17	Expressed in all tissues
dd_Smed_v6_20269_0_1	O75487	ENSG00000076716	glypican 4	GPC4	Mixed
dd_Smed_v6_2028_0_1	Q6P0Q8	ENSG00000086015	microtubule associated serine/threonine kinase 2	MAST2	Expressed in all tissues
dd_Smed_v6_20284_0_1	Q9NUD9	ENSG00000060642	phosphatidylinositol glycan anchor biosynthesis, class V	PIGV	Expressed in all tissues
dd_Smed_v6_2029_0_1	Q6FIF0	ENSG00000086666	zinc finger, AN1-type domain 6	ZFAND6	Expressed in all tissues
dd_Smed_v6_203_0_1	P84077	ENSG00000143761	ADP-ribosylation factor 1	ARF1	Expressed in all tissues
dd_Smed_v6_20318_0_1	Q8N2E2	ENSG00000146530	von Willebrand factor D and EGF domains	VWDE	Tissue enhanced	salivary gland
dd_Smed_v6_20334_0_1	Q6J4K2	ENSG00000089060	solute carrier family 8 (sodium/lithium/calcium exchanger), member B1	SLC8B1	Expressed in all tissues
dd_Smed_v6_2035_0_1	Q96FV9	ENSG00000079134	THO complex 1	THOC1	Expressed in all tissues
dd_Smed_v6_2037_0_1	Q12882	ENSG00000188641	dihydropyrimidine dehydrogenase	DPYD	Expressed in all tissues
dd_Smed_v6_2038_0_1	O76080	ENSG00000107372	zinc finger, AN1-type domain 5	ZFAND5	Expressed in all tissues
dd_Smed_v6_204_0_1	P62081	ENSG00000171863	ribosomal protein S7	RPS7	Expressed in all tissues
dd_Smed_v6_20423_0_1	O75943	ENSG00000152942	RAD17 homolog (S. pombe)	RAD17	Expressed in all tissues
dd_Smed_v6_2043_0_1	O43143	ENSG00000109606	DEAH (Asp-Glu-Ala-His) box helicase 15	DHX15	Expressed in all tissues
dd_Smed_v6_2044_0_1	Q5T0D9	ENSG00000158109	tumor protein p63 regulated 1-like	TPRG1L	Expressed in all tissues
dd_Smed_v6_2045_1_1	P61011	ENSG00000100883	signal recognition particle 54kDa	SRP54	Expressed in all tissues
dd_Smed_v6_20458_0_1	Q9UF02	ENSG00000075429	calcium channel, voltage-dependent, gamma subunit 5	CACNG5	Not detected
dd_Smed_v6_2046_0_1	Q9H3L0	ENSG00000168288	methylmalonic aciduria (cobalamin deficiency) cblD type, with homocystinuria	MMADHC	Expressed in all tissues
dd_Smed_v6_20479_0_1	Q13472	ENSG00000177302	topoisomerase (DNA) III alpha	TOP3A	Expressed in all tissues
dd_Smed_v6_20491_0_1	Q9UL62	ENSG00000072315	transient receptor potential cation channel, subfamily C, member 5	TRPC5	Tissue enhanced	brain, liver
dd_Smed_v6_20495_0_1	Q9UBN4	ENSG00000133107	transient receptor potential cation channel, subfamily C, member 4	TRPC4	Tissue enhanced	endometrium, smooth muscle
dd_Smed_v6_2050_0_1	Q02252	ENSG00000119711	aldehyde dehydrogenase 6 family, member A1	ALDH6A1	Group enriched	kidney,liver
dd_Smed_v6_2051_0_1	P51571	ENSG00000180879	signal sequence receptor, delta	SSR4	Expressed in all tissues
dd_Smed_v6_20520_0_1	Q3KRA9	ENSG00000239382	alkB, alkylation repair homolog 6 (E. coli)	ALKBH6	Expressed in all tissues
dd_Smed_v6_2053_0_1	Q8N357	ENSG00000213699	solute carrier family 35, member F6	SLC35F6	Expressed in all tissues
dd_Smed_v6_2054_0_1	Q15370	ENSG00000103363	transcription elongation factor B (SIII), polypeptide 2 (18kDa, elongin B)	TCEB2	Expressed in all tissues
dd_Smed_v6_2055_0_1	Q9GZM5	ENSG00000137207	Yip1 domain family, member 3	YIPF3	Expressed in all tissues
dd_Smed_v6_2057_0_1	P09001	ENSG00000114686	mitochondrial ribosomal protein L3	MRPL3	Expressed in all tissues
dd_Smed_v6_2058_0_1	Q6ZS17	ENSG00000039523	family with sequence similarity 65, member A	FAM65A	Expressed in all tissues
dd_Smed_v6_206_0_1	P24534	ENSG00000114942	eukaryotic translation elongation factor 1 beta 2	EEF1B2	Expressed in all tissues
dd_Smed_v6_2060_0_1	O60232	ENSG00000173465	Sjogren syndrome/scleroderma autoantigen 1	SSSCA1	Expressed in all tissues
dd_Smed_v6_2062_0_1	Q96DG6	ENSG00000164237	carboxymethylenebutenolidase homolog (Pseudomonas)	CMBL	Expressed in all tissues
dd_Smed_v6_2063_0_1	O00170	ENSG00000110711	aryl hydrocarbon receptor interacting protein	AIP	Expressed in all tissues
dd_Smed_v6_2064_0_1	Q13427	ENSG00000138398	peptidylprolyl isomerase G (cyclophilin G)	PPIG	Expressed in all tissues
dd_Smed_v6_20646_0_1	Q86WB7	ENSG00000112494	unc-93 homolog A (C. elegans)	UNC93A	Group enriched	duodenum,esophagus,liver,skin,small intestine
dd_Smed_v6_2065_0_1	Q09028	ENSG00000162521	retinoblastoma binding protein 4	RBBP4	Expressed in all tissues
dd_Smed_v6_2066_0_1	Q12907	ENSG00000169223	lectin, mannose-binding 2	LMAN2	Expressed in all tissues
dd_Smed_v6_20665_0_1	Q9UBS5	ENSG00000204681	gamma-aminobutyric acid (GABA) B receptor, 1	GABBR1	Expressed in all tissues
dd_Smed_v6_2068_0_1	Q8WV74	ENSG00000167799	nudix (nucleoside diphosphate linked moiety X)-type motif 8	NUDT8	Expressed in all tissues
dd_Smed_v6_2071_0_1	Q9Y5Q8	ENSG00000148308	general transcription factor IIIC, polypeptide 5, 63kDa	GTF3C5	Expressed in all tissues
dd_Smed_v6_2074_0_1	Q9Y3E5	ENSG00000141378	peptidyl-tRNA hydrolase 2	PTRH2	Expressed in all tissues
dd_Smed_v6_20755_0_1	Q969G2	ENSG00000121454	LIM homeobox 4	LHX4	Mixed
dd_Smed_v6_2076_0_1	O00264	ENSG00000101856	progesterone receptor membrane component 1	PGRMC1	Expressed in all tissues
dd_Smed_v6_20764_0_1	Q86VR8	ENSG00000179431	four jointed box 1 (Drosophila)	FJX1	Tissue enhanced	brain
dd_Smed_v6_2078_0_1	Q9BPW8	ENSG00000184117	nipsnap homolog 1 (C. elegans)	NIPSNAP1	Expressed in all tissues
dd_Smed_v6_2085_0_1	Q9NZ01	ENSG00000099797	trans-2,3-enoyl-CoA reductase	TECR	Expressed in all tissues
dd_Smed_v6_2086_0_1	O15355	ENSG00000115241	protein phosphatase, Mg2+/Mn2+ dependent, 1G	PPM1G	Expressed in all tissues
dd_Smed_v6_2092_0_1	P15036	ENSG00000157557	v-ets avian erythroblastosis virus E26 oncogene homolog 2	ETS2	Expressed in all tissues
dd_Smed_v6_2096_0_1	Q8NBN7	ENSG00000160439	retinol dehydrogenase 13 (all-trans/9-cis)	RDH13	Expressed in all tissues
dd_Smed_v6_20968_0_1	Q07864	ENSG00000177084	polymerase (DNA directed), epsilon, catalytic subunit	POLE	Expressed in all tissues
dd_Smed_v6_2098_0_1	Q9NZ45	ENSG00000122873	CDGSH iron sulfur domain 1	CISD1	Expressed in all tissues
dd_Smed_v6_2101_0_1	P84101	ENSG00000140264	small EDRK-rich factor 2	SERF2	Expressed in all tissues
dd_Smed_v6_2102_0_1	Q9UQ80	ENSG00000170515	proliferation-associated 2G4, 38kDa	PA2G4	Expressed in all tissues
dd_Smed_v6_2107_0_1	Q8NHR9	ENSG00000176732	profilin family, member 4	PFN4	Tissue enriched	testis
dd_Smed_v6_2109_1_1	P61803	ENSG00000129562	defender against cell death 1	DAD1	Expressed in all tissues
dd_Smed_v6_211_0_1	P36578	ENSG00000174444	ribosomal protein L4	RPL4	Expressed in all tissues
dd_Smed_v6_2110_0_1	P41743	ENSG00000163558	protein kinase C, iota	PRKCI	Expressed in all tissues
dd_Smed_v6_2111_0_1	P61978	ENSG00000165119	heterogeneous nuclear ribonucleoprotein K	HNRNPK	Expressed in all tissues
dd_Smed_v6_2112_0_1	Q9Y4E8	ENSG00000135655	ubiquitin specific peptidase 15	USP15	Expressed in all tissues
dd_Smed_v6_2115_0_1	O00116	ENSG00000018510	alkylglycerone phosphate synthase	AGPS	Expressed in all tissues
dd_Smed_v6_2117_0_1	P25787	ENSG00000106588	proteasome (prosome, macropain) subunit, alpha type, 2	PSMA2	Expressed in all tissues
dd_Smed_v6_2118_0_1	Q7Z3K3	ENSG00000143442	pogo transposable element with ZNF domain	POGZ	Expressed in all tissues
dd_Smed_v6_2119_0_1	P21796	ENSG00000213585	voltage-dependent anion channel 1	VDAC1	Expressed in all tissues
dd_Smed_v6_21196_0_1	P25021	ENSG00000113749	histamine receptor H2	HRH2	Tissue enhanced	bone marrow
dd_Smed_v6_2121_0_1	Q9UNE7	ENSG00000103266	STIP1 homology and U-box containing protein 1, E3 ubiquitin protein ligase	STUB1	Expressed in all tissues
dd_Smed_v6_2121_1_1	Q9BXT6	ENSG00000073146	Mov10l1, Moloney leukemia virus 10-like 1, homolog (mouse)	MOV10L1	Tissue enriched	testis
dd_Smed_v6_21248_0_1	Q9UJ78	ENSG00000132950	zinc finger, MYM-type 5	ZMYM5	Expressed in all tissues
dd_Smed_v6_2125_0_1	P62330	ENSG00000165527	ADP-ribosylation factor 6	ARF6	Expressed in all tissues
dd_Smed_v6_2126_0_1	O00487	ENSG00000115233	proteasome (prosome, macropain) 26S subunit, non-ATPase, 14	PSMD14	Expressed in all tissues
dd_Smed_v6_2127_0_1	Q9Y5U8	ENSG00000060762	mitochondrial pyruvate carrier 1	MPC1	Expressed in all tissues
dd_Smed_v6_2129_0_1	O75886	ENSG00000115145	signal transducing adaptor molecule (SH3 domain and ITAM motif) 2	STAM2	Expressed in all tissues
dd_Smed_v6_21305_0_1	P31641	ENSG00000131389	solute carrier family 6 (neurotransmitter transporter), member 6	SLC6A6	Expressed in all tissues
dd_Smed_v6_21323_0_1	Q13516	ENSG00000205927	oligodendrocyte lineage transcription factor 2	OLIG2	Tissue enriched	brain
dd_Smed_v6_2133_0_1	P62333	ENSG00000100519	proteasome (prosome, macropain) 26S subunit, ATPase, 6	PSMC6	Expressed in all tissues
dd_Smed_v6_2135_0_1	O00231	ENSG00000108671	proteasome (prosome, macropain) 26S subunit, non-ATPase, 11	PSMD11	Expressed in all tissues
dd_Smed_v6_2137_0_1	Q9Y2Q5	ENSG00000116586	late endosomal/lysosomal adaptor, MAPK and MTOR activator 2	LAMTOR2	Expressed in all tissues
dd_Smed_v6_214_0_1	P62273	ENSG00000213741	ribosomal protein S29	RPS29	Expressed in all tissues
dd_Smed_v6_214_1_1	P17900	ENSG00000196743	GM2 ganglioside activator	GM2A	Expressed in all tissues
dd_Smed_v6_2140_0_1	P48163	ENSG00000065833	malic enzyme 1, NADP(+)-dependent, cytosolic	ME1	Mixed
dd_Smed_v6_2141_0_1	Q9NZ32	ENSG00000131966	actin-related protein 10 homolog (S. cerevisiae)	ACTR10	Expressed in all tissues
dd_Smed_v6_2142_0_1	P13984	ENSG00000188342	general transcription factor IIF, polypeptide 2, 30kDa	GTF2F2	Expressed in all tissues
dd_Smed_v6_21461_0_1	P0C6T2	ENSG00000228474	oligosaccharyltransferase 4 homolog (S. cerevisiae)	OST4	Expressed in all tissues
dd_Smed_v6_21489_0_1	Q08174	ENSG00000156453	protocadherin 1	PCDH1	Expressed in all tissues
dd_Smed_v6_2149_0_1	Q86YQ8	ENSG00000139117	copine VIII	CPNE8	Expressed in all tissues
dd_Smed_v6_2150_1_1	Q3KQV9	ENSG00000197355	UDP-N-acteylglucosamine pyrophosphorylase 1-like 1	UAP1L1	Mixed
dd_Smed_v6_2151_0_1	Q9GZZ9	ENSG00000081307	ubiquitin-like modifier activating enzyme 5	UBA5	Expressed in all tissues
dd_Smed_v6_2152_0_1	O96005	ENSG00000104853	cleft lip and palate associated transmembrane protein 1	CLPTM1	Expressed in all tissues
dd_Smed_v6_2153_0_1	O60488	ENSG00000068366	acyl-CoA synthetase long-chain family member 4	ACSL4	Expressed in all tissues
dd_Smed_v6_2154_0_1	P30520	ENSG00000035687	adenylosuccinate synthase	ADSS	Expressed in all tissues
dd_Smed_v6_2156_0_1	P41252	ENSG00000196305	isoleucyl-tRNA synthetase	IARS	Expressed in all tissues
dd_Smed_v6_2157_0_1	Q5VTH2	ENSG00000188931	chromosome 1 open reading frame 192	C1orf192	Tissue enriched	fallopian tube
dd_Smed_v6_2159_0_1	P51532	ENSG00000127616	SWI/SNF related, matrix associated, actin dependent regulator of chromatin, subfamily a, member 4	SMARCA4	Expressed in all tissues
dd_Smed_v6_2161_0_1	Q04446	ENSG00000114480	glucan (1,4-alpha-), branching enzyme 1	GBE1	Expressed in all tissues
dd_Smed_v6_2165_0_1	P16152	ENSG00000159228	carbonyl reductase 1	CBR1	Expressed in all tissues
dd_Smed_v6_2168_0_1	O95140	ENSG00000116688	mitofusin 2	MFN2	Expressed in all tissues
dd_Smed_v6_21717_0_1	Q13562	ENSG00000162992	neuronal differentiation 1	NEUROD1	Group enriched	brain,colon,duodenum,pancreas,rectum,small intestine,stomach
dd_Smed_v6_2176_0_1	Q53EL6	ENSG00000150593	programmed cell death 4 (neoplastic transformation inhibitor)	PDCD4	Expressed in all tissues
dd_Smed_v6_21792_0_1	O95989	ENSG00000272325	nudix (nucleoside diphosphate linked moiety X)-type motif 3	NUDT3	Expressed in all tissues
dd_Smed_v6_2181_0_1	Q13011	ENSG00000104823	enoyl CoA hydratase 1, peroxisomal	ECH1	Expressed in all tissues
dd_Smed_v6_2182_0_1	P30876	ENSG00000047315	polymerase (RNA) II (DNA directed) polypeptide B, 140kDa	POLR2B	Expressed in all tissues
dd_Smed_v6_2183_0_1	Q9NRW4	ENSG00000112679	dual specificity phosphatase 22	DUSP22	Expressed in all tissues
dd_Smed_v6_2186_0_1	Q9Y2D4	ENSG00000144036	exocyst complex component 6B	EXOC6B	Mixed
dd_Smed_v6_219_0_1	P53634	ENSG00000109861	cathepsin C	CTSC	Expressed in all tissues
dd_Smed_v6_2190_0_1	O94826	ENSG00000154174	translocase of outer mitochondrial membrane 70 homolog A (S. cerevisiae)	TOMM70A	Expressed in all tissues
dd_Smed_v6_2192_0_1	Q96KA5	ENSG00000049656	CLPTM1-like	CLPTM1L	Expressed in all tissues
dd_Smed_v6_2194_0_1	Q86TM6	ENSG00000162298	synovial apoptosis inhibitor 1, synoviolin	SYVN1	Expressed in all tissues
dd_Smed_v6_2198_0_1	Q13190	ENSG00000162236	syntaxin 5	STX5	Expressed in all tissues
dd_Smed_v6_2199_0_1	Q9NTK5	ENSG00000138430	Obg-like ATPase 1	OLA1	Expressed in all tissues
dd_Smed_v6_220_0_1	P27797	ENSG00000179218	calreticulin	CALR	Expressed in all tissues
dd_Smed_v6_2201_0_1	Q86X24	ENSG00000143452	HORMA domain containing 1	HORMAD1	Tissue enriched	testis
dd_Smed_v6_2203_0_1	Q9H7C9	ENSG00000087884	adipogenesis associated, Mth938 domain containing	AAMDC	Expressed in all tissues
dd_Smed_v6_2211_0_1	Q9UJZ1	ENSG00000165283	stomatin (EPB72)-like 2	STOML2	Expressed in all tissues
dd_Smed_v6_2214_0_1	Q9Y678	ENSG00000181789	coatomer protein complex, subunit gamma 1	COPG1	Expressed in all tissues
dd_Smed_v6_2216_0_1	Q9Y3B4	ENSG00000115128	Pre-mRNA branch site protein p14	SF3B14	Expressed in all tissues
dd_Smed_v6_22163_0_1	A6NJT0	ENSG00000164853	UNC homeobox	UNCX	Not detected
dd_Smed_v6_2218_0_1	Q13148	ENSG00000120948	TAR DNA binding protein	TARDBP	Expressed in all tissues
dd_Smed_v6_2219_0_1	P42357	ENSG00000084110	histidine ammonia-lyase	HAL	Group enriched	bone marrow,liver,skin
dd_Smed_v6_222_0_1	P62854	ENSG00000197728	ribosomal protein S26	RPS26	Expressed in all tissues
dd_Smed_v6_2220_0_1	P82664	ENSG00000048544	mitochondrial ribosomal protein S10	MRPS10	Expressed in all tissues
dd_Smed_v6_22244_0_1	Q9UJA3	ENSG00000125885	minichromosome maintenance complex component 8	MCM8	Expressed in all tissues
dd_Smed_v6_2225_0_1	Q9BYC9	ENSG00000242485	mitochondrial ribosomal protein L20	MRPL20	Expressed in all tissues
dd_Smed_v6_2228_0_1	A0AV96	ENSG00000163694	RNA binding motif protein 47	RBM47	Mixed
dd_Smed_v6_2233_0_1	Q92499	ENSG00000079785	DEAD (Asp-Glu-Ala-Asp) box helicase 1	DDX1	Expressed in all tissues
dd_Smed_v6_22331_0_1	Q92786	ENSG00000117707	prospero homeobox 1	PROX1	Tissue enhanced	liver
dd_Smed_v6_2235_0_1	Q92882	ENSG00000134996	osteoclast stimulating factor 1	OSTF1	Expressed in all tissues
dd_Smed_v6_22398_0_1	P29973	ENSG00000198515	cyclic nucleotide gated channel alpha 1	CNGA1	Mixed
dd_Smed_v6_224_0_1	P05386	ENSG00000137818	ribosomal protein, large, P1	RPLP1	Expressed in all tissues
dd_Smed_v6_2240_0_1	Q9UHB9	ENSG00000167881	signal recognition particle 68kDa	SRP68	Expressed in all tissues
dd_Smed_v6_2241_0_1	P61106	ENSG00000119396	RAB14, member RAS oncogene family	RAB14	Expressed in all tissues
dd_Smed_v6_2244_0_1	P14174	ENSG00000240972	macrophage migration inhibitory factor (glycosylation-inhibiting factor)	MIF	Expressed in all tissues
dd_Smed_v6_2245_0_1	Q6NUQ4	ENSG00000119777	transmembrane protein 214	TMEM214	Expressed in all tissues
dd_Smed_v6_22479_0_1	Q9UBP5	ENSG00000135547	hes-related family bHLH transcription factor with YRPW motif 2	HEY2	Tissue enhanced	fallopian tube
dd_Smed_v6_225_0_1	Q9Y6H1	ENSG00000106153	coiled-coil-helix-coiled-coil-helix domain containing 2	CHCHD2	Expressed in all tissues
dd_Smed_v6_2251_0_1	Q13523	ENSG00000112739	pre-mRNA processing factor 4B	PRPF4B	Expressed in all tissues
dd_Smed_v6_2252_0_1	Q9H6K4	ENSG00000125741	optic atrophy 3 (autosomal recessive, with chorea and spastic paraplegia)	OPA3	Expressed in all tissues
dd_Smed_v6_22524_0_1	P31268	ENSG00000122592	homeobox A7	HOXA7	Mixed
dd_Smed_v6_2254_0_1	O15371	ENSG00000100353	eukaryotic translation initiation factor 3, subunit D	EIF3D	Expressed in all tissues
dd_Smed_v6_2255_0_1	P22033	ENSG00000146085	methylmalonyl CoA mutase	MUT	Expressed in all tissues
dd_Smed_v6_22567_0_1	Q96DM1	ENSG00000182405	piggyBac transposable element derived 4	PGBD4	Mixed
dd_Smed_v6_2257_0_1	P08684	ENSG00000160868	cytochrome P450, family 3, subfamily A, polypeptide 4	CYP3A4	Group enriched	duodenum,liver,small intestine
dd_Smed_v6_22585_0_1	Q96T25	ENSG00000139800	Zic family member 5	ZIC5	Group enriched	brain,testis
dd_Smed_v6_2259_0_1	Q15404	ENSG00000148484	Ras suppressor protein 1	RSU1	Expressed in all tissues
dd_Smed_v6_226_0_1	P15880	ENSG00000140988	ribosomal protein S2	RPS2	Expressed in all tissues
dd_Smed_v6_2261_0_1	Q15057	ENSG00000114331	ArfGAP with coiled-coil, ankyrin repeat and PH domains 2	ACAP2	Expressed in all tissues
dd_Smed_v6_22624_0_1	O43614	ENSG00000137252	hypocretin (orexin) receptor 2	HCRTR2	Not detected
dd_Smed_v6_22626_0_1	O15405	ENSG00000103460	TOX high mobility group box family member 3	TOX3	Mixed
dd_Smed_v6_2263_0_1	Q7Z4W1	ENSG00000169738	dicarbonyl/L-xylulose reductase	DCXR	Expressed in all tissues
dd_Smed_v6_22637_0_1	Q6J272	ENSG00000188163	family with sequence similarity 166, member A	FAM166A	Tissue enriched	testis
dd_Smed_v6_2267_0_1	P55010	ENSG00000100664	eukaryotic translation initiation factor 5	EIF5	Expressed in all tissues
dd_Smed_v6_227_0_1	P62280	ENSG00000142534	ribosomal protein S11	RPS11	Expressed in all tissues
dd_Smed_v6_2271_0_1	Q86XE0	ENSG00000172803	sorting nexin 32	SNX32	Tissue enhanced	brain
dd_Smed_v6_2272_0_1	O75369	ENSG00000136068	filamin B, beta	FLNB	Expressed in all tissues
dd_Smed_v6_2274_0_1	P09012	ENSG00000077312	small nuclear ribonucleoprotein polypeptide A	SNRPA	Expressed in all tissues
dd_Smed_v6_2276_0_1	Q9BS26	ENSG00000023318	endoplasmic reticulum protein 44	ERP44	Expressed in all tissues
dd_Smed_v6_228_0_1	P84098	ENSG00000108298	ribosomal protein L19	RPL19	Expressed in all tissues
dd_Smed_v6_2280_0_1	P30566	ENSG00000239900	adenylosuccinate lyase	ADSL	Expressed in all tissues
dd_Smed_v6_2284_0_1	Q13107	ENSG00000114316	ubiquitin specific peptidase 4 (proto-oncogene)	USP4	Expressed in all tissues
dd_Smed_v6_2285_0_1	Q5J8M3	ENSG00000128463	ER membrane protein complex subunit 4	EMC4	Expressed in all tissues
dd_Smed_v6_2286_0_1	P31350	ENSG00000171848	ribonucleotide reductase M2	RRM2	Tissue enhanced	bone marrow
dd_Smed_v6_2287_0_1	Q86UC2	ENSG00000130363	radial spoke 3 homolog (Chlamydomonas)	RSPH3	Mixed
dd_Smed_v6_2288_0_1	Q9UGI0	ENSG00000019995	zinc finger, RAN-binding domain containing 1	ZRANB1	Expressed in all tissues
dd_Smed_v6_2290_0_1	Q9BPX1	ENSG00000087076	hydroxysteroid (17-beta) dehydrogenase 14	HSD17B14	Tissue enhanced	kidney
dd_Smed_v6_2295_0_1	Q14978	ENSG00000166197	nucleolar and coiled-body phosphoprotein 1	NOLC1	Expressed in all tissues
dd_Smed_v6_2296_0_1	Q9NQP4	ENSG00000101132	prefoldin subunit 4	PFDN4	Expressed in all tissues
dd_Smed_v6_2298_0_1	Q9P2R7	ENSG00000136143	succinate-CoA ligase, ADP-forming, beta subunit	SUCLA2	Expressed in all tissues
dd_Smed_v6_22992_0_1	P09016	ENSG00000170166	homeobox D4	HOXD4	Tissue enhanced	endometrium
dd_Smed_v6_230_0_1	Q6P5R6	ENSG00000163584	ribosomal protein L22-like 1	RPL22L1	Expressed in all tissues
dd_Smed_v6_2300_0_1	Q9BZC7	ENSG00000107331	ATP-binding cassette, sub-family A (ABC1), member 2	ABCA2	Expressed in all tissues
dd_Smed_v6_2301_0_1	Q9UBI1	ENSG00000148444	COMM domain containing 3	COMMD3	Expressed in all tissues
dd_Smed_v6_2302_0_1	P55884	ENSG00000106263	eukaryotic translation initiation factor 3, subunit B	EIF3B	Expressed in all tissues
dd_Smed_v6_2303_0_1	P30048	ENSG00000165672	peroxiredoxin 3	PRDX3	Expressed in all tissues
dd_Smed_v6_2304_0_1	Q14108	ENSG00000138760	scavenger receptor class B, member 2	SCARB2	Expressed in all tissues
dd_Smed_v6_2305_0_1	P08253	ENSG00000087245	matrix metallopeptidase 2 (gelatinase A, 72kDa gelatinase, 72kDa type IV collagenase)	MMP2	Tissue enhanced	gallbladder, urinary bladder
dd_Smed_v6_2306_0_1	A5D8V6	ENSG00000167987	vacuolar protein sorting 37 homolog C (S. cerevisiae)	VPS37C	Expressed in all tissues
dd_Smed_v6_23063_0_1	Q8NCM2	ENSG00000140015	potassium voltage-gated channel, subfamily H (eag-related), member 5	KCNH5	Tissue enhanced	adrenal gland, brain
dd_Smed_v6_2308_0_1	Q96EC8	ENSG00000181704	Yip1 domain family, member 6	YIPF6	Expressed in all tissues
dd_Smed_v6_2309_0_1	Q96DA6	ENSG00000205981	DnaJ (Hsp40) homolog, subfamily C, member 19	DNAJC19	Expressed in all tissues
dd_Smed_v6_23099_0_1	Q68DU8	ENSG00000183775	potassium channel tetramerization domain containing 16	KCTD16	Tissue enhanced	brain
dd_Smed_v6_231_0_1	O75347	ENSG00000171530	tubulin folding cofactor A	TBCA	Expressed in all tissues
dd_Smed_v6_2312_0_1	P34896	ENSG00000176974	serine hydroxymethyltransferase 1 (soluble)	SHMT1	Expressed in all tissues
dd_Smed_v6_2313_0_1	Q13423	ENSG00000112992	nicotinamide nucleotide transhydrogenase	NNT	Expressed in all tissues
dd_Smed_v6_2314_0_1	Q15363	ENSG00000086598	transmembrane emp24 domain trafficking protein 2	TMED2	Expressed in all tissues
dd_Smed_v6_2319_0_1	Q8N5G2	ENSG00000204178	transmembrane protein 57	TMEM57	Expressed in all tissues
dd_Smed_v6_2321_0_1	Q9UEE9	ENSG00000153774	craniofacial development protein 1	CFDP1	Expressed in all tissues
dd_Smed_v6_2322_0_1	Q8N201	ENSG00000164880	integrator complex subunit 1	INTS1	Expressed in all tissues
dd_Smed_v6_2324_0_1	Q9Y4L1	ENSG00000149428	hypoxia up-regulated 1	HYOU1	Expressed in all tissues
dd_Smed_v6_23249_0_1	Q9UJU5	ENSG00000187140	forkhead box D3	FOXD3	Not detected
dd_Smed_v6_2325_0_1	Q13573	ENSG00000100603	SNW domain containing 1	SNW1	Expressed in all tissues
dd_Smed_v6_2327_0_1	P60891	ENSG00000147224	phosphoribosyl pyrophosphate synthetase 1	PRPS1	Expressed in all tissues
dd_Smed_v6_2328_0_1	Q13126	ENSG00000099810	methylthioadenosine phosphorylase	MTAP	Expressed in all tissues
dd_Smed_v6_2331_0_1	Q14839	ENSG00000111642	chromodomain helicase DNA binding protein 4	CHD4	Expressed in all tissues
dd_Smed_v6_2332_0_1	Q5VSL9	ENSG00000143093	striatin interacting protein 1	STRIP1	Expressed in all tissues
dd_Smed_v6_2339_0_1	Q9UIF3	ENSG00000092850	tektin 2 (testicular)	TEKT2	Group enriched	fallopian tube,testis
dd_Smed_v6_2340_0_1	Q9BT22	ENSG00000033011	ALG1, chitobiosyldiphosphodolichol beta-mannosyltransferase	ALG1	Expressed in all tissues
dd_Smed_v6_2341_0_1	O14672	ENSG00000137845	ADAM metallopeptidase domain 10	ADAM10	Expressed in all tissues
dd_Smed_v6_2344_0_1	Q92600	ENSG00000144580	RCD1 required for cell differentiation1 homolog (S. pombe)	RQCD1	Expressed in all tissues
dd_Smed_v6_2347_0_1	Q9NVA1	ENSG00000101019	ubiquinol-cytochrome c reductase complex assembly factor 1	UQCC1	Expressed in all tissues
dd_Smed_v6_2348_0_1	P82933	ENSG00000135972	mitochondrial ribosomal protein S9	MRPS9	Expressed in all tissues
dd_Smed_v6_235_0_1	P61254	ENSG00000161970	ribosomal protein L26	RPL26	Expressed in all tissues
dd_Smed_v6_2351_0_1	P51589	ENSG00000134716	cytochrome P450, family 2, subfamily J, polypeptide 2	CYP2J2	Tissue enhanced	heart muscle, liver, small intestine
dd_Smed_v6_2352_0_1	Q13454	ENSG00000104723	tumor suppressor candidate 3	TUSC3	Tissue enhanced	placenta
dd_Smed_v6_23571_0_1	P02768	ENSG00000163631	albumin	ALB	Tissue enriched	liver
dd_Smed_v6_2358_0_1	Q5VV42	ENSG00000145996	CDK5 regulatory subunit associated protein 1-like 1	CDKAL1	Expressed in all tissues
dd_Smed_v6_23589_0_1	Q9BRT9	ENSG00000147536	GINS complex subunit 4 (Sld5 homolog)	GINS4	Mixed
dd_Smed_v6_2359_0_1	Q14197	ENSG00000167862	immature colon carcinoma transcript 1	ICT1	Expressed in all tissues
dd_Smed_v6_23596_0_1	Q8NBW4	ENSG00000177058	solute carrier family 38, member 9	SLC38A9	Expressed in all tissues
dd_Smed_v6_236_0_1	P63173	ENSG00000172809	ribosomal protein L38	RPL38	Expressed in all tissues
dd_Smed_v6_2360_0_1	Q93096	ENSG00000112245	protein tyrosine phosphatase type IVA, member 1	PTP4A1	Expressed in all tissues
dd_Smed_v6_23601_0_1	Q4G0J3	ENSG00000174720	La ribonucleoprotein domain family, member 7	LARP7	Expressed in all tissues
dd_Smed_v6_2362_0_1	Q9H0C8	ENSG00000132323	integrin-linked kinase-associated serine/threonine phosphatase	ILKAP	Expressed in all tissues
dd_Smed_v6_2365_0_1	P56377	ENSG00000182287	adaptor-related protein complex 1, sigma 2 subunit	AP1S2	Expressed in all tissues
dd_Smed_v6_237_0_1	P62244	ENSG00000134419	ribosomal protein S15a	RPS15A	Expressed in all tissues
dd_Smed_v6_2372_0_1	Q8N5M1	ENSG00000171953	ATP synthase mitochondrial F1 complex assembly factor 2	ATPAF2	Expressed in all tissues
dd_Smed_v6_2373_0_1	Q5TF21	ENSG00000214338	SOGA family member 3	SOGA3	Tissue enriched	brain
dd_Smed_v6_2376_0_1	O60613	ENSG00000183291	Homo sapiens 15 kDa selenoprotein (SEP15), transcript variant 2, mRNA.	2018-09-15	Expressed in all tissues
dd_Smed_v6_2377_0_1	P22314	ENSG00000130985	ubiquitin-like modifier activating enzyme 1	UBA1	Expressed in all tissues
dd_Smed_v6_2378_0_1	O95169	ENSG00000166136	NADH dehydrogenase (ubiquinone) 1 beta subcomplex, 8, 19kDa	NDUFB8	Expressed in all tissues
dd_Smed_v6_2382_0_1	Q9Y696	ENSG00000169504	chloride intracellular channel 4	CLIC4	Expressed in all tissues
dd_Smed_v6_2384_0_1	Q9BZZ5	ENSG00000166181	apoptosis inhibitor 5	API5	Expressed in all tissues
dd_Smed_v6_2388_0_1	P50897	ENSG00000131238	palmitoyl-protein thioesterase 1	PPT1	Expressed in all tissues
dd_Smed_v6_2389_0_1	A5YKK6	ENSG00000125107	CCR4-NOT transcription complex, subunit 1	CNOT1	Expressed in all tissues
dd_Smed_v6_2392_0_1	P52756	ENSG00000003756	RNA binding motif protein 5	RBM5	Expressed in all tissues
dd_Smed_v6_2393_0_1	P11498	ENSG00000173599	pyruvate carboxylase	PC	Expressed in all tissues
dd_Smed_v6_2395_0_1	Q9HCD5	ENSG00000124160	nuclear receptor coactivator 5	NCOA5	Expressed in all tissues
dd_Smed_v6_23954_0_1	O15457	ENSG00000057468	mutS homolog 4	MSH4	Tissue enriched	testis
dd_Smed_v6_2399_0_1	P47755	ENSG00000198898	capping protein (actin filament) muscle Z-line, alpha 2	CAPZA2	Expressed in all tissues
dd_Smed_v6_2402_0_1	P28331	ENSG00000023228	NADH dehydrogenase (ubiquinone) Fe-S protein 1, 75kDa (NADH-coenzyme Q reductase)	NDUFS1	Expressed in all tissues
dd_Smed_v6_2404_0_1	Q49B96	ENSG00000240230	cytochrome c oxidase assembly homolog 19 (S. cerevisiae)	COX19	Expressed in all tissues
dd_Smed_v6_2406_0_1	Q13724	ENSG00000115275	mannosyl-oligosaccharide glucosidase	MOGS	Expressed in all tissues
dd_Smed_v6_2411_0_1	O15523	ENSG00000067048	DEAD (Asp-Glu-Ala-Asp) box helicase 3, Y-linked	DDX3Y	Mixed
dd_Smed_v6_2413_0_1	P17612	ENSG00000072062	protein kinase, cAMP-dependent, catalytic, alpha	PRKACA	Expressed in all tissues
dd_Smed_v6_2416_0_1	Q6P2E9	ENSG00000038358	enhancer of mRNA decapping 4	EDC4	Expressed in all tissues
dd_Smed_v6_2417_0_1	O43447	ENSG00000171960	peptidylprolyl isomerase H (cyclophilin H)	PPIH	Expressed in all tissues
dd_Smed_v6_2418_0_1	Q9NRR8	ENSG00000197622	CDC42 small effector 1	CDC42SE1	Expressed in all tissues
dd_Smed_v6_24180_0_1	Q6P988	ENSG00000185269	notum pectinacetylesterase homolog (Drosophila)	NOTUM	Tissue enriched	placenta
dd_Smed_v6_2420_0_1	Q9BT30	ENSG00000125652	alkB, alkylation repair homolog 7 (E. coli)	ALKBH7	Expressed in all tissues
dd_Smed_v6_2421_0_1	P11387	ENSG00000198900	topoisomerase (DNA) I	TOP1	Expressed in all tissues
dd_Smed_v6_2422_0_1	Q5T4S7	ENSG00000127481	ubiquitin protein ligase E3 component n-recognin 4	UBR4	Expressed in all tissues
dd_Smed_v6_2424_0_1	P84103	ENSG00000112081	serine/arginine-rich splicing factor 3	SRSF3	Expressed in all tissues
dd_Smed_v6_2426_0_1	Q6PD74	ENSG00000103591	alpha- and gamma-adaptin binding protein	AAGAB	Expressed in all tissues
dd_Smed_v6_2431_0_1	P09543	ENSG00000173786	2',3'-cyclic nucleotide 3' phosphodiesterase	CNP	Tissue enriched	brain
dd_Smed_v6_2435_0_1	P23381	ENSG00000140105	tryptophanyl-tRNA synthetase	WARS	Expressed in all tissues
dd_Smed_v6_2436_0_1	Q8ND25	ENSG00000186187	zinc and ring finger 1, E3 ubiquitin protein ligase	ZNRF1	Expressed in all tissues
dd_Smed_v6_2439_0_1	Q9BUX1	ENSG00000128965	ChaC, cation transport regulator homolog 1 (E. coli)	CHAC1	Tissue enhanced	esophagus, pancreas
dd_Smed_v6_2440_0_1	Q9Y4Z0	ENSG00000130520	LSM4 homolog, U6 small nuclear RNA associated (S. cerevisiae)	LSM4	Expressed in all tissues
dd_Smed_v6_24408_0_1	A2PYH4	ENSG00000162669	HFM1, ATP-dependent DNA helicase homolog (S. cerevisiae)	HFM1	Tissue enhanced	testis
dd_Smed_v6_2441_0_1	Q96CX6	ENSG00000163428	leucine rich repeat containing 58	LRRC58	Expressed in all tissues
dd_Smed_v6_2443_0_1	Q9Y4G6	ENSG00000171914	talin 2	TLN2	Tissue enhanced	kidney
dd_Smed_v6_2445_0_1	Q86UL3	ENSG00000158669	1-acylglycerol-3-phosphate O-acyltransferase 6	AGPAT6	Expressed in all tissues
dd_Smed_v6_24454_0_1	P07550	ENSG00000169252	adrenoceptor beta 2, surface	ADRB2	Mixed
dd_Smed_v6_2447_0_1	Q6ZVM7	ENSG00000175662	target of myb1-like 2 (chicken)	TOM1L2	Expressed in all tissues
dd_Smed_v6_2449_0_1	Q6ZT89	ENSG00000145832	solute carrier family 25, member 48	SLC25A48	Tissue enhanced	brain, kidney
dd_Smed_v6_2452_0_1	P08962	ENSG00000135404	CD63 molecule	CD63	Expressed in all tissues
dd_Smed_v6_2455_0_1	Q9NS69	ENSG00000100216	translocase of outer mitochondrial membrane 22 homolog (yeast)	TOMM22	Expressed in all tissues
dd_Smed_v6_24574_0_1	Q8IW70	ENSG00000178233	transmembrane protein 151B	TMEM151B	Tissue enriched	brain
dd_Smed_v6_2458_0_1	Q15050	ENSG00000179041	RRS1 ribosome biogenesis regulator homolog (S. cerevisiae)	RRS1	Expressed in all tissues
dd_Smed_v6_2461_0_1	Q9P0I2	ENSG00000125037	ER membrane protein complex subunit 3	EMC3	Expressed in all tissues
dd_Smed_v6_2463_0_1	Q5VZ89	ENSG00000137145	DENN/MADD domain containing 4C	DENND4C	Expressed in all tissues
dd_Smed_v6_2465_0_1	Q9NVJ2	ENSG00000134108	ADP-ribosylation factor-like 8B	ARL8B	Expressed in all tissues
dd_Smed_v6_2466_0_1	P20336	ENSG00000105649	RAB3A, member RAS oncogene family	RAB3A	Tissue enriched	brain
dd_Smed_v6_2469_0_1	Q3ZCQ8	ENSG00000105197	translocase of inner mitochondrial membrane 50 homolog (S. cerevisiae)	TIMM50	Expressed in all tissues
dd_Smed_v6_2470_0_1	Q9NY47	ENSG00000007402	calcium channel, voltage-dependent, alpha 2/delta subunit 2	CACNA2D2	Tissue enriched	lung
dd_Smed_v6_2471_0_1	Q658Y4	ENSG00000176853	family with sequence similarity 91, member A1	FAM91A1	Expressed in all tissues
dd_Smed_v6_2472_0_1	O75907	ENSG00000185000	diacylglycerol O-acyltransferase 1	DGAT1	Group enriched	duodenum,small intestine
dd_Smed_v6_2474_0_1	Q00403	ENSG00000137947	general transcription factor IIB	GTF2B	Expressed in all tissues
dd_Smed_v6_2475_0_1	Q8WZA0	ENSG00000162441	leucine zipper and CTNNBIP1 domain containing	LZIC	Expressed in all tissues
dd_Smed_v6_2476_0_1	P48059	ENSG00000169756	LIM and senescent cell antigen-like domains 1	LIMS1	Expressed in all tissues
dd_Smed_v6_2477_0_1	P49721	ENSG00000126067	proteasome (prosome, macropain) subunit, beta type, 2	PSMB2	Expressed in all tissues
dd_Smed_v6_2480_0_1	P54920	ENSG00000105402	N-ethylmaleimide-sensitive factor attachment protein, alpha	NAPA	Expressed in all tissues
dd_Smed_v6_2481_0_1	Q13200	ENSG00000175166	proteasome (prosome, macropain) 26S subunit, non-ATPase, 2	PSMD2	Expressed in all tissues
dd_Smed_v6_2482_0_1	Q9BRA2	ENSG00000129235	thioredoxin domain containing 17	TXNDC17	Expressed in all tissues
dd_Smed_v6_2483_0_1	Q86UP2	ENSG00000126777	kinectin 1 (kinesin receptor)	KTN1	Expressed in all tissues
dd_Smed_v6_2486_0_1	Q969Q5	ENSG00000169228	RAB24, member RAS oncogene family	RAB24	Expressed in all tissues
dd_Smed_v6_2487_0_1	O96015	ENSG00000100246	dynein, axonemal, light chain 4	DNAL4	Expressed in all tissues
dd_Smed_v6_2488_0_1	P07814	ENSG00000136628	glutamyl-prolyl-tRNA synthetase	EPRS	Expressed in all tissues
dd_Smed_v6_2489_0_1	Q9BX74	ENSG00000162604	TM2 domain containing 1	TM2D1	Expressed in all tissues
dd_Smed_v6_24908_0_1	P14867	ENSG00000022355	gamma-aminobutyric acid (GABA) A receptor, alpha 1	GABRA1	Tissue enriched	brain
dd_Smed_v6_2493_0_1	O00423	ENSG00000066629	echinoderm microtubule associated protein like 1	EML1	Mixed
dd_Smed_v6_2494_0_1	Q86YS6	ENSG00000172780	RAB43, member RAS oncogene family	RAB43	Tissue enhanced	thyroid gland
dd_Smed_v6_2496_0_1	Q16186	ENSG00000130706	adhesion regulating molecule 1	ADRM1	Expressed in all tissues
dd_Smed_v6_2497_0_1	O95433	ENSG00000100591	AHA1, activator of heat shock 90kDa protein ATPase homolog 1 (yeast)	AHSA1	Expressed in all tissues
dd_Smed_v6_2498_0_1	Q9H3P7	ENSG00000182827	acyl-CoA binding domain containing 3	ACBD3	Expressed in all tissues
dd_Smed_v6_24988_0_1	A6NKG5	ENSG00000254656	retrotransposon-like 1	RTL1	Group enriched	adrenal gland,placenta
dd_Smed_v6_250_0_1	P07237	ENSG00000185624	prolyl 4-hydroxylase, beta polypeptide	P4HB	Expressed in all tissues
dd_Smed_v6_2501_0_1	Q9H0A8	ENSG00000140365	COMM domain containing 4	COMMD4	Expressed in all tissues
dd_Smed_v6_2502_1_1	Q96LK0	ENSG00000174007	centrosomal protein 19kDa	CEP19	Mixed
[truncated: 3,562 more rows]

## Sheet: F7SD1-C. RBH_tissue_summary
tissue	gut_RBH	gut_RBH_total	gut_RBH_pct	all_RBH	all_RBH_total	all_RBH_pct	Fold Enrichment
adipose tissue	2	699	0.286123	16	5561	0.287718	0.994456
adrenal gland	5	699	0.715308	47	5561	0.845172	0.846346
appendix*	1	699	0.143062	2	5561	0.0359648	3.97783
bone marrow	7	699	1.00143	35	5561	0.629383	1.59113
brain	23	699	3.29041	194	5561	3.48858	0.943196
colon	3	699	0.429185	16	5561	0.287718	1.49168
duodenum	19	699	2.71817	41	5561	0.737277	3.68677
endometrium	0	699	0	11	5561	0.197806	0
esophagus	5	699	0.715308	26	5561	0.467542	1.52993
fallopian tube	0	699	0	190	5561	3.41665	0
gallbladder	6	699	0.858369	16	5561	0.287718	2.98337
heart muscle	4	699	0.572246	41	5561	0.737277	0.776161
kidney	26	699	3.7196	69	5561	1.24078	2.99778
liver	35	699	5.00715	103	5561	1.85218	2.70338
lung	3	699	0.429185	25	5561	0.449559	0.954678
lymph node	1	699	0.143062	8	5561	0.143859	0.994456
ovary	2	699	0.286123	14	5561	0.251753	1.13652
pancreas	4	699	0.572246	24	5561	0.431577	1.32594
placenta	4	699	0.572246	36	5561	0.647366	0.883961
prostate	1	699	0.143062	21	5561	0.37763	0.378841
rectum	3	699	0.429185	17	5561	0.3057	1.40394
salivary gland	4	699	0.572246	20	5561	0.359648	1.59113
skeletal muscle	2	699	0.286123	57	5561	1.025	0.279146
skin	12	699	1.71674	41	5561	0.737277	2.32848
small intestine	20	699	2.86123	49	5561	0.881136	3.2472
smooth muscle*	0	699	0	5	5561	0.0899119	0
spleen	0	699	0	12	5561	0.215789	0
stomach	2	699	0.286123	16	5561	0.287718	0.994456
testis	24	699	3.43348	352	5561	6.3298	0.542431
thyroid gland	7	699	1.00143	32	5561	0.575436	1.7403
tonsil	5	699	0.715308	15	5561	0.269736	2.65188
urinary bladder	0	699	0	6	5561	0.107894	0

## Sheet: F7SD1-D. RBH_global_summary
tissue	gut_RBH	gut_RBH_total	gut_RBH_pct	all_RBH	all_RBH_total	all_RBH_pct	all_HPA	all_HPA_total	all_HPA_pct
group enriched	30	699	4.29185	212	5561	3.81226	1109	20344	5.45124
tissue enriched	27	699	3.86266	275	5561	4.94515	3478	20344	17.0959
tissue enhanced	73	699	10.4435	524	5561	9.42277	2355	20344	11.5759
total	130	699	18.598	1011	5561	18.1802	6942	20344	34.1231

## Sheet: F7SD1-E. TBLASTX_smed_vs_human
Query	UniProtKB_ID	eval	length	ident
dd_Smed_v6_10001_0_1	P49842	1.98e-18	65	38.462
dd_Smed_v6_100026_0_1	Q53H47	2.17e-17	73	32.877
dd_Smed_v6_10002_0_1	Q9UJJ9	2.41e-14	73	32.877
dd_Smed_v6_10003_0_1	Q96JJ7	5.23e-36	75	38.667
dd_Smed_v6_100044_0_1	Q9NS87	3.17e-05	25	56
dd_Smed_v6_10004_0_1	O95613	0.001	102	20.588
dd_Smed_v6_10006_0_1	Q9UJJ7	1.68e-39	73	52.055
dd_Smed_v6_100074_0_1	Q02985	3.38e-11	42	59.524
dd_Smed_v6_10007_0_1	Q8TE12	1.38e-33	81	37.037
dd_Smed_v6_100081_0_1	P35348	4.31e-06	66	34.848
dd_Smed_v6_1000_0_1	P68400	1.04e-174	333	75.075
dd_Smed_v6_10010_0_1	Q969G3	3.27e-19	102	32.353
dd_Smed_v6_10011_0_1	Q9UPQ0	1.11e-30	59	52.542
dd_Smed_v6_100143_0_1	Q16798	1.05e-41	89	74.157
dd_Smed_v6_100149_0_1	P27824	4.01e-31	84	59.524
dd_Smed_v6_10014_0_1	O95819	5.4e-101	124	83.871
dd_Smed_v6_10016_0_1	Q8NF64	2.04e-27	47	42.553
dd_Smed_v6_10018_0_1	O43156	7.15e-27	185	29.189
dd_Smed_v6_10019_0_1	O76064	1.72e-08	40	47.5
dd_Smed_v6_1001_0_1	Q15459	2.06e-134	182	66.484
dd_Smed_v6_10020_0_1	P49146	1.59e-37	106	43.396
dd_Smed_v6_10021_0_1	U3KQ87	1.46e-15	34	47.059
dd_Smed_v6_100226_0_1	Q53H47	7.79e-05	42	45.238
dd_Smed_v6_10022_0_1	Q9NQQ7	5.29e-103	291	52.234
dd_Smed_v6_100234_0_1	P46777	1.09e-16	35	54.286
dd_Smed_v6_100246_0_1	Q5JVF3	3.67e-08	62	37.097
dd_Smed_v6_10024_0_1	Q9P2E3	1.02e-172	173	44.509
dd_Smed_v6_100263_0_1	P48764	1.06e-18	117	33.333
dd_Smed_v6_100266_0_1	Q8N2Q7	2e-29	87	47.126
dd_Smed_v6_100278_0_1	Q15760	7.51e-05	35	37.143
dd_Smed_v6_10027_0_1	Q9H7Z6	8.26e-116	220	68.636
dd_Smed_v6_10028_0_1	Q7Z624	3.7e-33	50	50
dd_Smed_v6_10029_0_1	Q7Z4N2	6.53e-70	82	43.902
dd_Smed_v6_1002_0_1	Q00796	5.12e-105	199	58.291
dd_Smed_v6_100300_0_1	Q12986	1.65e-13	44	38.636
dd_Smed_v6_10030_0_1	O75554	1.06e-20	24	75
dd_Smed_v6_100316_0_1	P63261	1.19e-24	82	56.098
dd_Smed_v6_100318_0_1	Q13472	4.86e-16	36	63.889
dd_Smed_v6_100319_0_1	Q9H0D6	1.24e-09	45	51.111
dd_Smed_v6_10031_0_1	Q9UBT2	4.04e-97	207	68.116
dd_Smed_v6_10032_0_1	Q8WVS4	2.88e-25	55	45.455
dd_Smed_v6_10033_0_1	P23258	0	298	69.128
dd_Smed_v6_100347_0_1	O00139	1.04e-07	58	51.724
dd_Smed_v6_10034_0_1	Q96HW7	1.7e-45	147	36.735
dd_Smed_v6_10037_0_1	Q9NVV4	9.64e-06	137	21.168
dd_Smed_v6_100387_0_1	P05388	2.27e-11	56	50
dd_Smed_v6_10038_0_1	O60315	2.52e-64	91	72.527
dd_Smed_v6_10039_0_1	Q8N2R0	8.39e-44	86	73.256
dd_Smed_v6_1003_0_1	P62079	5.96e-13	43	41.86
dd_Smed_v6_100457_0_1	Q6PEY2	2.88e-05	32	53.125
dd_Smed_v6_10045_0_1	Q92630	0	318	74.214
dd_Smed_v6_10047_0_1	Q96NB1	4.08e-27	73	52.055
dd_Smed_v6_100485_0_1	P10253	1.58e-14	30	53.333
dd_Smed_v6_10049_0_1	Q9BY79	0.000192	26	50
dd_Smed_v6_1004_0_1	P22695	1.98e-11	111	28.829
dd_Smed_v6_10050_0_1	Q96A57	2.25e-13	45	62.222
dd_Smed_v6_10051_0_1	Q9BX79	3.55e-09	117	25.641
dd_Smed_v6_100524_0_1	P02647	2.86e-38	78	82.051
dd_Smed_v6_10053_0_1	P54727	1.08e-08	43	39.535
dd_Smed_v6_10054_0_1	Q99614	1.64e-48	156	44.231
dd_Smed_v6_100558_0_1	P48058	6.41e-05	51	37.255
dd_Smed_v6_10055_0_1	Q92630	7.02e-101	200	72
dd_Smed_v6_10056_0_1	Q8IXW5	1.68e-22	116	27.586
dd_Smed_v6_100573_0_1	Q6ZMK1	1.11e-08	66	36.364
dd_Smed_v6_100575_0_1	P63261	1.36e-13	65	53.846
dd_Smed_v6_10058_0_1	Q9ULG3	1.93e-09	58	32.759
dd_Smed_v6_10060_0_1	Q6P5X5	1.47e-09	66	28.788
dd_Smed_v6_10062_0_1	Q7Z5J8	3.85e-52	179	29.609
dd_Smed_v6_10064_0_1	P32780	6.84e-58	79	44.304
dd_Smed_v6_10065_0_1	O60318	2.91e-70	75	54.667
dd_Smed_v6_10066_0_1	O60447	1.84e-118	271	55.72
dd_Smed_v6_10068_0_1	Q9NRN9	9.97e-44	96	51.042
dd_Smed_v6_10069_0_1	P42285	0	238	68.908
dd_Smed_v6_1006_0_1	P16615	0	480	71.25
dd_Smed_v6_100708_0_1	Q49AG3	5.3e-09	64	37.5
dd_Smed_v6_10070_0_1	Q9UNA1	6.69e-68	101	33.663
dd_Smed_v6_10072_0_1	Q3KR16	1.32e-37	126	30.159
dd_Smed_v6_10074_0_1	Q9BR09	7.13e-19	96	37.5
dd_Smed_v6_10075_0_1	P23352	4.7e-24	127	34.646
dd_Smed_v6_10078_0_1	Q9Y2M0	9.24e-27	118	31.356
dd_Smed_v6_100790_0_1	Q9H6R3	6.27e-09	60	38.333
dd_Smed_v6_100799_0_1	P63261	3.28e-05	31	54.839
dd_Smed_v6_10079_0_1	Q9H0C1	5.51e-93	243	51.852
dd_Smed_v6_10081_0_1	Q13190	4.21e-06	39	53.846
dd_Smed_v6_10082_0_1	O43933	6.58e-25	104	46.154
dd_Smed_v6_10083_0_1	P14649	1.95e-11	51	41.176
dd_Smed_v6_10084_0_1	Q96FJ2	7.25e-49	90	83.333
dd_Smed_v6_100866_0_1	Q8IVF4	3.97e-17	74	50
dd_Smed_v6_10086_0_1	Q9C099	2.27e-106	422	32.227
dd_Smed_v6_10087_0_1	Q3MIX3	2.69e-119	161	54.037
dd_Smed_v6_10088_0_1	Q8IZL2	0.000408	81	29.63
dd_Smed_v6_1008_0_1	O00584	1.22e-11	56	41.071
dd_Smed_v6_10090_0_1	Q9UHW5	4.43e-12	59	30.508
dd_Smed_v6_10092_0_1	P25490	3.82e-75	121	85.124
dd_Smed_v6_100930_0_1	P55072	5.09e-36	87	80.46
dd_Smed_v6_10093_0_1	Q96FZ2	2.22e-24	49	34.694
dd_Smed_v6_10094_0_1	O94910	1.08e-05	44	38.636
dd_Smed_v6_100951_0_1	Q3ZCM7	3.66e-25	81	45.679
dd_Smed_v6_10095_0_1	Q5H8A4	5.67e-71	80	35
dd_Smed_v6_10096_0_1	Q96SY0	3.48e-20	61	44.262
dd_Smed_v6_10097_0_1	Q8N1M1	4.01e-32	76	35.526
dd_Smed_v6_10098_0_1	Q9NQ66	2.91e-30	146	39.726
dd_Smed_v6_10099_0_1	Q8NFD2	4.41e-12	97	35.052
dd_Smed_v6_1009_0_1	Q9NUP9	1.25e-90	195	76.923
dd_Smed_v6_1009_1_1	Q6J4K2	2.41e-47	113	50.442
dd_Smed_v6_101021_0_1	O95789	9.78e-07	48	41.667
dd_Smed_v6_10102_0_1	Q5VZV1	1.29e-09	46	39.13
dd_Smed_v6_10103_0_1	Q92766	7.47e-23	49	61.224
dd_Smed_v6_10104_0_1	Q96AX9	2.46e-07	47	38.298
dd_Smed_v6_10105_0_1	Q9H7N4	2.7e-05	51	41.176
dd_Smed_v6_10106_0_1	O94813	3.71e-09	64	34.375
dd_Smed_v6_101075_0_1	Q6ZNG9	0.000115	65	35.385
dd_Smed_v6_10107_0_1	Q9NXC5	1.84e-41	32	59.375
dd_Smed_v6_101083_0_1	Q96MW7	0.000381	25	56
dd_Smed_v6_10108_0_1	P42285	0	253	68.379
dd_Smed_v6_10109_0_1	P51522	2.55e-24	47	48.936
dd_Smed_v6_101106_0_1	P62136	2.34e-21	36	69.444
dd_Smed_v6_10110_0_1	Q9UPT9	3.02e-62	36	75
dd_Smed_v6_10111_0_1	P62837	8.3e-14	94	29.787
dd_Smed_v6_101129_0_1	Q7KZI7	1.83e-38	82	71.951
dd_Smed_v6_10112_0_1	O75197	1.44e-33	57	31.579
dd_Smed_v6_10113_0_1	Q9NVX2	3.64e-123	166	45.181
dd_Smed_v6_10115_0_1	P00519	3.55e-29	35	51.429
dd_Smed_v6_10116_0_1	Q9BYB0	3.89e-70	132	45.455
dd_Smed_v6_101179_0_1	Q9NY65	1.19e-24	82	51.22
dd_Smed_v6_101183_0_1	Q9H6S0	3.52e-16	90	42.222
dd_Smed_v6_10119_0_1	P54132	1.41e-152	199	60.804
dd_Smed_v6_10120_0_1	Q8WZ64	1.03e-32	76	42.105
dd_Smed_v6_10121_0_1	Q5TEA3	1.63e-59	105	42.857
dd_Smed_v6_10123_0_1	Q8NFU5	3.53e-26	78	35.897
dd_Smed_v6_10124_0_1	Q86X45	2.75e-84	129	44.961
dd_Smed_v6_101254_0_1	Q9NYC9	3.62e-21	51	54.902
dd_Smed_v6_10127_0_1	Q6UX98	8.31e-14	50	52
dd_Smed_v6_101280_0_1	Q14012	1.32e-13	24	62.5
dd_Smed_v6_10129_0_1	Q9Y5B8	2.83e-127	221	45.249
dd_Smed_v6_1012_0_1	O95478	1.7e-93	115	59.13
dd_Smed_v6_101304_0_1	Q4LE39	0.000489	30	40
dd_Smed_v6_101308_0_1	Q49AG3	3.7e-17	27	62.963
dd_Smed_v6_10130_0_1	Q14416	2.02e-51	110	36.364
dd_Smed_v6_10131_0_1	Q9HCS5	1.71e-21	57	45.614
dd_Smed_v6_10132_0_1	Q96Q35	7.79e-10	117	24.786
dd_Smed_v6_10133_0_1	Q9NVP1	7.92e-136	175	54.286
dd_Smed_v6_10134_0_1	Q9UJT9	2.59e-06	44	34.091
dd_Smed_v6_10135_0_1	Q9H6R3	3.12e-23	80	32.5
dd_Smed_v6_101366_0_1	O60290	0.000277	46	32.609
dd_Smed_v6_10136_0_1	A4D1F6	1.31e-48	144	30.556
dd_Smed_v6_10140_0_1	Q8IYT3	1.93e-50	194	32.474
dd_Smed_v6_101414_0_1	P18077	2.37e-31	49	63.265
dd_Smed_v6_10141_0_1	Q9NV64	2.04e-58	117	35.897
dd_Smed_v6_10142_0_1	P35555	2.03e-66	49	44.898
dd_Smed_v6_101436_0_1	Q9Y4A0	3.95e-08	63	33.333
dd_Smed_v6_10143_0_1	P46100	1.13e-05	41	29.268
dd_Smed_v6_101443_0_1	P51170	0.000183	38	34.211
dd_Smed_v6_10144_0_1	Q86SG6	1.6e-87	106	45.283
dd_Smed_v6_10145_0_1	Q9BRB3	4.68e-37	96	44.792
dd_Smed_v6_10147_0_1	Q7RTX9	1.77e-26	71	38.028
dd_Smed_v6_101482_0_1	Q12879	3.51e-05	41	41.463
dd_Smed_v6_101489_0_1	Q8IZ13	1.69e-07	47	42.553
dd_Smed_v6_10148_0_1	P15056	1.46e-135	166	66.265
dd_Smed_v6_10149_0_1	O43791	6.64e-100	119	73.109
dd_Smed_v6_10151_0_1	Q7RTR2	6.4e-11	128	28.906
dd_Smed_v6_10152_0_1	Q92949	1.65e-44	110	65.455
dd_Smed_v6_101534_0_1	O60282	2.4e-17	49	71.429
dd_Smed_v6_101551_0_1	Q8N752	3.46e-20	69	53.623
dd_Smed_v6_10155_0_1	Q99685	9.19e-28	119	23.529
dd_Smed_v6_10156_0_1	Q01668	0	214	58.879
dd_Smed_v6_10158_0_1	H3BMG3	0.000203	41	46.341
dd_Smed_v6_10159_0_1	O60906	2.28e-34	107	39.252
dd_Smed_v6_10160_0_1	Q9NY26	9.89e-35	65	44.615
dd_Smed_v6_10161_0_1	Q5VYS8	3.31e-18	75	37.333
dd_Smed_v6_10163_0_1	O14802	9.39e-13	85	37.647
dd_Smed_v6_10164_0_1	Q9UEE5	3.66e-48	187	42.246
dd_Smed_v6_101655_0_1	O14802	1.64e-32	84	65.476
dd_Smed_v6_10167_0_1	Q15833	3.06e-87	115	32.174
dd_Smed_v6_10169_0_1	Q14410	5.99e-53	48	52.083
dd_Smed_v6_1016_0_1	P61165	8.3e-39	80	76.25
dd_Smed_v6_10171_0_1	P18507	1.44e-10	109	29.358
dd_Smed_v6_101724_0_1	Q53H47	3.11e-19	69	53.623
dd_Smed_v6_10174_0_1	P35609	9.56e-56	110	75.455
dd_Smed_v6_10175_0_1	Q8IY45	1.66e-38	236	29.237
dd_Smed_v6_10176_0_1	P23468	0	162	69.753
dd_Smed_v6_10179_0_1	P17844	2.33e-84	241	55.187
dd_Smed_v6_1017_0_1	P28799	2.48e-10	35	51.429
dd_Smed_v6_10180_0_1	O15213	1.96e-92	221	44.796
dd_Smed_v6_10182_0_1	Q9UHJ9	3.93e-28	59	38.983
dd_Smed_v6_10183_0_1	Q96Q11	2.17e-100	215	49.767
dd_Smed_v6_10185_0_1	O75928	1.94e-21	80	48.75
dd_Smed_v6_10186_0_1	Q9BXC9	4.57e-81	203	57.143
dd_Smed_v6_101878_0_1	Q92743	0.000611	45	37.778
dd_Smed_v6_101884_0_1	Q01813	9.61e-36	96	62.5
dd_Smed_v6_10188_0_1	Q86YJ6	4.16e-19	71	42.254
dd_Smed_v6_10189_0_1	O96028	3.4e-115	130	43.846
dd_Smed_v6_1018_0_1	Q07817	1.6e-05	29	34.483
dd_Smed_v6_101910_0_1	O75688	4.02e-20	86	43.023
dd_Smed_v6_10191_0_1	Q9NYC9	0	265	66.415
dd_Smed_v6_10192_0_1	Q9P2U7	4.7e-178	177	58.192
dd_Smed_v6_101932_0_1	P37288	9.32e-14	106	31.132
dd_Smed_v6_10193_0_1	P26639	0	186	63.441
dd_Smed_v6_10198_0_1	O15234	1.96e-07	57	31.579
dd_Smed_v6_10199_0_1	Q3KNW5	4.95e-33	168	32.738
dd_Smed_v6_101_0_1	O95925	4.66e-12	61	42.623
dd_Smed_v6_10200_0_1	Q5I0G3	8.77e-82	216	42.593
dd_Smed_v6_10201_0_1	Q9UN79	6.89e-51	99	74.747
dd_Smed_v6_10203_0_1	P10074	1.18e-10	37	45.946
dd_Smed_v6_10205_0_1	P62140	5.98e-36	62	46.774
dd_Smed_v6_10206_0_1	O14734	1.16e-20	82	35.366
dd_Smed_v6_102076_0_1	O96020	3.01e-05	96	25
dd_Smed_v6_102081_0_1	P05089	1.11e-08	93	30.108
dd_Smed_v6_10208_0_1	Q53H47	3.6e-26	57	42.105
dd_Smed_v6_10209_0_1	Q70CQ1	4.56e-05	42	33.333
dd_Smed_v6_1020_0_1	P15735	3.84e-113	223	57.399
dd_Smed_v6_10210_0_1	Q6ZU65	4.4e-09	36	47.222
dd_Smed_v6_102111_0_1	Q03591	1.56e-41	87	68.966
dd_Smed_v6_102114_0_1	Q9NY65	3.2e-22	67	55.224
dd_Smed_v6_102119_0_1	O14556	1.36e-30	83	65.06
dd_Smed_v6_10211_0_1	Q5VWX1	5.46e-23	64	51.562
dd_Smed_v6_102126_0_1	Q6PEY2	9.32e-22	69	47.826
dd_Smed_v6_10212_0_1	Q5TZF3	7.33e-19	173	25.434
dd_Smed_v6_102138_0_1	P18621	1.06e-29	73	68.493
dd_Smed_v6_10214_0_1	Q8NF91	8.28e-09	87	24.138
dd_Smed_v6_10215_0_1	Q6EKJ0	2.51e-05	65	29.231
dd_Smed_v6_10216_0_1	O43623	9.01e-56	106	73.585
dd_Smed_v6_10218_0_1	Q96QE2	6.41e-112	123	44.715
dd_Smed_v6_10219_0_1	Q02548	1.82e-70	129	82.171
dd_Smed_v6_10220_0_1	Q9BYM8	9.83e-16	40	40
dd_Smed_v6_102217_0_1	P0CF97	4.27e-09	37	56.757
dd_Smed_v6_10221_0_1	P78504	5.66e-13	46	36.957
dd_Smed_v6_102222_0_1	Q8TCP9	5.14e-06	69	31.884
dd_Smed_v6_102226_0_1	Q9H6R3	1.3e-11	69	36.232
dd_Smed_v6_10222_0_1	Q9UHK0	2.98e-07	43	44.186
dd_Smed_v6_10223_0_1	Q92685	9e-114	233	55.794
dd_Smed_v6_10224_0_1	P10619	1.14e-09	38	60.526
dd_Smed_v6_102256_0_1	P62140	2.26e-41	78	73.077
dd_Smed_v6_10225_0_1	Q9UFF9	8.75e-43	178	40.449
dd_Smed_v6_102268_0_1	P01024	4.66e-31	67	70.149
dd_Smed_v6_10228_0_1	O60308	2.24e-140	242	31.818
dd_Smed_v6_10229_0_1	Q96RT7	5.64e-06	57	26.316
dd_Smed_v6_102323_0_1	Q9BZC7	5.42e-20	81	44.444
dd_Smed_v6_10232_0_1	O77932	5.02e-13	28	50
dd_Smed_v6_10235_0_1	Q15813	3.53e-56	89	40.449
dd_Smed_v6_102369_0_1	P68133	1.93e-09	43	58.14
dd_Smed_v6_102370_0_1	Q9Y5X5	1.2e-17	75	41.333
dd_Smed_v6_102379_0_1	Q7RTX9	8.4e-08	86	33.721
dd_Smed_v6_10237_0_1	O75385	4.2e-72	79	58.228
dd_Smed_v6_10238_0_1	Q9NZC9	9.14e-109	64	64.062
dd_Smed_v6_102399_0_1	P62826	0.000164	27	62.963
dd_Smed_v6_10239_0_1	P0DP25	1.68e-32	81	46.914
dd_Smed_v6_1023_0_1	Q9BVK6	4.33e-43	92	58.696
dd_Smed_v6_102403_0_1	Q8TE73	1.33e-49	103	70.874
dd_Smed_v6_10241_0_1	O75838	1.41e-25	77	45.455
dd_Smed_v6_10244_0_1	A6PVC2	1.28e-102	77	62.338
dd_Smed_v6_10246_0_1	Q86YS3	5.89e-29	156	27.564
dd_Smed_v6_10248_0_1	Q8N9Z9	4.98e-15	70	30
dd_Smed_v6_102499_0_1	P68366	8.42e-18	68	51.471
dd_Smed_v6_10249_0_1	Q14789	1.81e-14	124	24.194
dd_Smed_v6_1024_0_1	P01266	9.43e-11	56	41.071
dd_Smed_v6_10255_0_1	Q96MY1	4.68e-08	40	47.5
dd_Smed_v6_10257_0_1	A0A1B0GVM2	1.43e-14	80	36.25
dd_Smed_v6_10259_0_1	Q9P2N4	1.05e-109	82	41.463
dd_Smed_v6_1025_0_1	P17987	0	543	68.877
dd_Smed_v6_102609_0_1	Q8IVF4	1.03e-22	76	56.579
dd_Smed_v6_10260_0_1	Q8N2I2	4.37e-11	41	41.463
dd_Smed_v6_10261_0_1	Q9BVI4	9.03e-16	127	29.921
dd_Smed_v6_10262_0_1	Q96MV1	1.1e-19	117	27.35
dd_Smed_v6_10263_0_1	Q8NA23	2.09e-41	124	44.355
dd_Smed_v6_10264_0_1	Q86X19	5.8e-37	138	42.754
dd_Smed_v6_10266_0_1	O00194	2.14e-66	71	77.465
dd_Smed_v6_10267_0_1	P08217	2.71e-36	102	30.392
dd_Smed_v6_10268_0_1	Q8IWL3	1.27e-09	78	25.641
dd_Smed_v6_102692_0_1	Q5JST6	5.85e-08	44	43.182
dd_Smed_v6_10269_0_1	Q6PKX4	1.42e-06	43	39.535
dd_Smed_v6_1026_0_1	Q5FVE4	3.67e-165	296	46.284
dd_Smed_v6_10270_0_1	Q92930	3.98e-57	169	47.929
dd_Smed_v6_10271_0_1	Q8NDM7	0	168	45.833
dd_Smed_v6_10272_0_1	Q96MP8	4.33e-30	132	43.182
dd_Smed_v6_10273_0_1	Q96ST3	8.24e-35	155	40.645
dd_Smed_v6_10276_0_1	Q8NBJ5	1.58e-144	148	47.973
dd_Smed_v6_10277_0_1	Q9UGI6	1.45e-90	127	49.606
dd_Smed_v6_10278_0_1	P31153	3.64e-179	377	71.088
dd_Smed_v6_102795_0_1	Q14738	9.3e-23	93	54.839
dd_Smed_v6_10279_0_1	P62633	1.09e-25	35	45.714
dd_Smed_v6_1027_0_1	O00534	5.99e-62	160	36.25
dd_Smed_v6_102810_0_1	Q9UL16	2.41e-14	138	28.986
dd_Smed_v6_10281_0_1	Q9BUZ4	8.77e-21	95	36.842
dd_Smed_v6_10282_0_1	Q8NF91	1.27e-12	97	23.711
dd_Smed_v6_102845_0_1	Q9NY65	1.07e-23	45	55.556
dd_Smed_v6_10288_0_1	O94827	8.99e-23	56	39.286
dd_Smed_v6_10289_0_1	Q9NXH9	1.61e-115	133	51.88
dd_Smed_v6_102900_0_1	P46779	2.01e-10	61	40.984
dd_Smed_v6_10290_0_1	Q6P3S1	3.54e-13	68	27.941
dd_Smed_v6_10291_0_1	Q01484	1.4e-13	104	30.769
dd_Smed_v6_102931_0_1	Q99873	3.17e-08	27	74.074
dd_Smed_v6_10293_0_1	Q13643	1.34e-55	238	33.193
dd_Smed_v6_10294_0_1	Q7Z2K8	7.23e-07	34	55.882
dd_Smed_v6_102989_0_1	Q15811	4.06e-06	65	30.769
dd_Smed_v6_1029_0_1	O95819	0	215	73.023
dd_Smed_v6_102_0_1	O75690	0.000505	32	43.75
dd_Smed_v6_10301_0_1	Q6PI98	1.93e-18	80	50
dd_Smed_v6_10302_0_1	Q99707	0	356	64.607
dd_Smed_v6_10304_0_1	O95477	0	250	40.8
dd_Smed_v6_103063_0_1	Q8TE73	2.45e-38	96	65.625
dd_Smed_v6_10306_0_1	Q13439	1.34e-35	112	36.607
dd_Smed_v6_1030_0_1	O15212	2.81e-23	120	38.333
dd_Smed_v6_10310_0_1	Q9UG56	2.57e-83	105	61.905
dd_Smed_v6_10311_0_1	Q12830	1.13e-108	137	43.796
dd_Smed_v6_103126_0_1	Q9BUF5	2.64e-30	84	61.905
dd_Smed_v6_10313_0_1	Q6P4Q7	2.37e-05	61	34.426
dd_Smed_v6_103146_0_1	Q9NS87	2.7e-10	58	41.379
dd_Smed_v6_10315_0_1	Q8IVV2	7.44e-37	80	28.75
dd_Smed_v6_10316_0_1	Q15546	2.33e-49	98	45.918
dd_Smed_v6_103174_0_1	Q99758	3.38e-06	28	67.857
dd_Smed_v6_103177_0_1	Q15669	6.32e-09	52	40.385
dd_Smed_v6_10318_0_1	O75112	2.52e-60	113	37.168
dd_Smed_v6_10319_0_1	Q9P1Q0	5.65e-78	137	32.117
dd_Smed_v6_1031_0_1	Q9NY33	0	169	65.68
dd_Smed_v6_10320_0_1	Q9H165	8.03e-40	83	72.289
dd_Smed_v6_103216_0_1	Q14832	1.15e-09	39	46.154
dd_Smed_v6_10322_0_1	P43681	1e-57	151	39.735
dd_Smed_v6_10323_0_1	Q9UQB9	2.61e-89	174	50
dd_Smed_v6_103248_0_1	P08237	1.51e-19	59	67.797
dd_Smed_v6_10324_0_1	A4D161	1.18e-98	143	55.944
dd_Smed_v6_10325_0_1	P47211	5.9e-45	121	37.19
dd_Smed_v6_10327_0_1	Q8IXY8	8.06e-47	116	59.483
dd_Smed_v6_10328_0_1	Q12816	0.000361	65	35.385
dd_Smed_v6_10329_0_1	Q8NFH5	7.14e-23	89	44.944
dd_Smed_v6_1032_0_1	Q96BA8	2.28e-39	101	65.347
dd_Smed_v6_103303_0_1	P32418	8.06e-33	87	57.471
dd_Smed_v6_10330_0_1	Q9C0E2	4.98e-13	73	28.767
dd_Smed_v6_103336_0_1	P48454	5.02e-53	88	88.636
dd_Smed_v6_10333_0_1	P0DMQ5	5.29e-09	31	74.194
dd_Smed_v6_10334_0_1	P22303	1.15e-80	90	47.778
dd_Smed_v6_103352_0_1	O75564	1.48e-05	40	37.5
dd_Smed_v6_10335_0_1	Q12834	5.69e-21	50	32
dd_Smed_v6_103369_0_1	P46940	1.78e-10	50	54
dd_Smed_v6_10336_0_1	Q12788	3.64e-33	50	44
dd_Smed_v6_10337_0_1	O94826	8.2e-32	116	31.897
dd_Smed_v6_10338_0_1	P09874	0	156	58.333
dd_Smed_v6_103398_0_1	Q6NT04	1.66e-05	25	56
dd_Smed_v6_10339_0_1	Q56UN5	3.26e-62	161	47.205
dd_Smed_v6_1033_0_1	P02794	6.77e-60	88	69.318
dd_Smed_v6_10340_0_1	Q8IY37	2.44e-151	127	59.055
dd_Smed_v6_10342_0_1	Q6ZQY2	2.05e-19	130	30
dd_Smed_v6_10343_0_1	P08684	8.87e-80	107	47.664
dd_Smed_v6_103453_0_1	P68363	4.16e-22	72	55.556
dd_Smed_v6_10346_0_1	Q6ZV65	2.06e-21	73	36.986
dd_Smed_v6_10347_0_1	Q7Z3B4	5.16e-38	114	37.719
dd_Smed_v6_10349_0_1	Q8N2K0	2.08e-44	58	48.276
dd_Smed_v6_1034_0_1	P26196	0	288	72.222
dd_Smed_v6_103522_0_1	P60510	1.48e-14	32	68.75
dd_Smed_v6_10354_0_1	Q9UMX1	1.94e-87	115	34.783
dd_Smed_v6_10355_0_1	P78417	6.38e-12	65	41.538
dd_Smed_v6_10357_0_1	O94923	1.54e-59	60	50
dd_Smed_v6_1035_1_1	Q13191	4.41e-44	91	43.956
dd_Smed_v6_10360_0_1	Q6NZY4	1.88e-14	52	42.308
dd_Smed_v6_10362_1_1	Q9H0E9	1.99e-21	63	34.921
dd_Smed_v6_10364_0_1	Q6UWP2	9.92e-63	73	56.164
dd_Smed_v6_103690_0_1	P68371	1.9e-39	73	84.932
dd_Smed_v6_10369_0_1	Q7Z7A1	7.03e-103	591	19.966
dd_Smed_v6_1036_0_1	I3L0A0	3.12e-44	116	51.724
dd_Smed_v6_10370_0_1	Q08752	3e-10	96	30.208
dd_Smed_v6_103710_0_1	P55072	1.5e-27	71	85.915
dd_Smed_v6_10372_0_1	Q8N468	2.86e-30	109	32.11
dd_Smed_v6_10373_0_1	Q96C11	6.73e-78	92	36.957
dd_Smed_v6_10374_0_1	Q9Y2G9	0	164	61.585
dd_Smed_v6_103755_0_1	P12532	1.31e-15	61	54.098
dd_Smed_v6_10375_0_1	Q4VX76	1.17e-11	98	31.633
dd_Smed_v6_103770_0_1	P62987	2.45e-22	53	69.811
dd_Smed_v6_103778_0_1	P19827	1.3e-26	51	88.235
dd_Smed_v6_10377_0_1	O95163	1.7e-90	120	43.333
dd_Smed_v6_103782_0_1	O00463	2.54e-06	51	29.412
dd_Smed_v6_10378_0_1	Q9H8H2	3.89e-104	178	47.191
dd_Smed_v6_1037_0_1	Q13637	1.68e-75	135	73.333
dd_Smed_v6_10380_0_1	O95185	5.57e-47	86	41.86
dd_Smed_v6_10383_0_1	Q9H0J4	0.00073	38	36.842
dd_Smed_v6_103855_0_1	O75844	1.11e-06	36	41.667
dd_Smed_v6_103866_0_1	Q96JB1	2.61e-36	106	58.491
dd_Smed_v6_10386_0_1	Q13253	1.08e-18	76	40.789
dd_Smed_v6_103874_0_1	Q92949	2.95e-26	68	64.706
dd_Smed_v6_10387_0_1	P51787	8.57e-111	187	65.241
dd_Smed_v6_10388_0_1	Q8N6M3	2.54e-26	71	42.254
dd_Smed_v6_103892_0_1	Q68EN5	2.2e-16	82	41.463
dd_Smed_v6_10389_0_1	P83110	7.82e-05	34	50
dd_Smed_v6_1038_0_1	P35232	1.38e-111	267	67.416
dd_Smed_v6_10390_0_1	Q99575	1.68e-41	95	44.211
dd_Smed_v6_10391_0_1	P35626	0	293	79.522
dd_Smed_v6_10392_0_1	Q9BY41	4.72e-44	115	59.13
dd_Smed_v6_10393_0_1	Q92626	8.15e-09	74	32.432
dd_Smed_v6_103943_0_1	Q86UP8	0.000117	34	52.941
dd_Smed_v6_10394_0_1	P12755	3.82e-33	49	44.898
dd_Smed_v6_103956_0_1	Q9BQE3	5.1e-18	72	43.056
dd_Smed_v6_10397_0_1	Q6TCH7	2.47e-76	172	38.953
dd_Smed_v6_10398_0_1	Q9H3R0	1.15e-134	233	57.082
dd_Smed_v6_104002_0_1	Q99497	1.18e-12	59	47.458
dd_Smed_v6_104003_0_1	P51513	2.71e-16	37	67.568
dd_Smed_v6_104016_0_1	O75376	1.43e-06	18	100
dd_Smed_v6_10402_0_1	Q9H845	2.4e-38	89	46.067
dd_Smed_v6_10403_0_1	P23528	2.08e-08	40	60
dd_Smed_v6_10404_0_1	O75792	2.54e-65	167	48.503
dd_Smed_v6_10405_0_1	Q7Z4T9	1.28e-89	84	69.048
dd_Smed_v6_10406_0_1	Q16832	1.61e-48	58	51.724
dd_Smed_v6_10407_0_1	Q9Y4K3	6.51e-09	47	31.915
dd_Smed_v6_104085_0_1	P23975	1.53e-21	91	38.462
dd_Smed_v6_10409_0_1	Q8IZS8	1.19e-27	55	43.636
dd_Smed_v6_10411_0_1	O60683	4.73e-15	41	51.22
dd_Smed_v6_10412_0_1	Q13304	0.000299	108	20.37
dd_Smed_v6_10414_0_1	Q9NRR4	5.21e-125	141	52.482
dd_Smed_v6_10415_0_1	Q96PY6	6.52e-21	51	41.176
dd_Smed_v6_104168_0_1	Q8TCP9	2.27e-10	58	50
dd_Smed_v6_10417_0_1	Q9UPP1	1.43e-79	72	55.556
dd_Smed_v6_104181_0_1	Q86UP8	6.05e-10	42	47.619
dd_Smed_v6_10419_0_1	Q12789	3.07e-05	29	41.379
dd_Smed_v6_10424_0_1	Q13114	1.92e-29	124	29.032
dd_Smed_v6_10425_0_1	Q96DT5	7.72e-49	143	23.077
dd_Smed_v6_10426_0_1	Q17R89	2.19e-49	126	47.619
dd_Smed_v6_104276_0_1	Q9UFH2	1.77e-25	66	68.182
dd_Smed_v6_10427_0_1	Q13285	3.32e-51	42	66.667
dd_Smed_v6_104282_0_1	Q86YT5	1.25e-18	66	50
dd_Smed_v6_10429_0_1	Q4VX76	7.47e-13	75	28
dd_Smed_v6_104318_0_1	P35558	1.48e-25	42	71.429
dd_Smed_v6_10431_0_1	Q96JN8	5.1e-131	139	52.518
dd_Smed_v6_104332_0_1	Q14568	2.11e-09	41	60.976
dd_Smed_v6_104348_0_1	P51530	0.000115	43	32.558
dd_Smed_v6_10434_0_1	O60231	0	411	58.394
dd_Smed_v6_10435_0_1	Q9BX10	4.01e-76	86	56.977
dd_Smed_v6_104361_0_1	Q9NY65	2.88e-28	92	48.913
dd_Smed_v6_10436_0_1	Q9UBX3	2.73e-76	113	54.867
dd_Smed_v6_10437_0_1	Q03431	1.9e-24	47	38.298
dd_Smed_v6_10438_0_1	Q9UI10	9.1e-34	97	30.928
dd_Smed_v6_10441_0_1	Q96HH6	8.43e-55	101	36.634
dd_Smed_v6_10443_0_1	O15226	2.71e-08	65	30.769
dd_Smed_v6_10444_0_1	Q8N960	9.97e-138	101	52.475
dd_Smed_v6_104475_0_1	P06737	1.77e-29	74	66.216
dd_Smed_v6_10447_0_1	Q0P651	1.61e-56	113	55.752
dd_Smed_v6_104483_0_1	P46778	1.01e-05	30	63.333
dd_Smed_v6_10448_0_1	Q9H1A4	1.27e-20	80	32.5
dd_Smed_v6_10449_0_1	Q9NZW4	5.88e-05	126	23.016
dd_Smed_v6_1044_0_1	P15121	4.56e-79	119	50.42
dd_Smed_v6_10450_0_1	Q6UWH6	3.72e-17	55	41.818
dd_Smed_v6_104545_0_1	P98164	1.73e-07	34	41.176
dd_Smed_v6_10454_0_1	O60502	1.24e-52	55	78.182
dd_Smed_v6_104565_0_1	Q96MW7	1.22e-12	41	43.902
dd_Smed_v6_104574_0_1	P49207	7.06e-19	82	50
dd_Smed_v6_104582_0_1	Q9NY65	3.67e-24	92	42.391
dd_Smed_v6_10458_0_1	Q9Y345	0	244	57.787
dd_Smed_v6_10459_1_1	O14647	0	203	60.591
dd_Smed_v6_1045_0_1	P24534	1.07e-32	69	79.71
dd_Smed_v6_104604_0_1	Q8TF01	4.5e-42	78	96.154
dd_Smed_v6_104605_0_1	Q6R2W3	1.78e-08	59	40.678
dd_Smed_v6_10460_0_1	Q8IVV2	0	194	38.66
dd_Smed_v6_104623_0_1	O76031	2.39e-22	80	63.75
dd_Smed_v6_10462_0_1	O75386	7.74e-100	144	68.75
dd_Smed_v6_10464_0_1	Q8N6S4	2.07e-71	138	34.058
dd_Smed_v6_104650_0_1	P62854	8.8e-15	51	62.745
dd_Smed_v6_10466_0_1	Q6ZRR5	2.26e-21	85	41.176
dd_Smed_v6_10467_0_1	Q9Y5E5	3.41e-45	84	42.857
dd_Smed_v6_10469_0_1	Q13253	4.77e-15	88	35.227
dd_Smed_v6_10471_0_1	Q13442	0.000246	40	52.5
dd_Smed_v6_10472_0_1	Q13409	5.21e-120	188	58.511
dd_Smed_v6_10474_0_1	Q6PJI9	2.97e-19	31	45.161
dd_Smed_v6_10477_0_1	Q92932	3.3e-09	58	41.379
dd_Smed_v6_10478_0_1	O75879	2.58e-84	105	58.095
dd_Smed_v6_10479_0_1	Q8NBH2	2.03e-18	62	35.484
dd_Smed_v6_1047_0_1	Q96EP5	2.82e-41	67	53.731
dd_Smed_v6_10480_0_1	Q96Q45	2.55e-07	80	32.5
dd_Smed_v6_10481_0_1	O14775	1.46e-153	216	68.519
dd_Smed_v6_10483_0_1	O14717	1.56e-50	63	52.381
dd_Smed_v6_10484_0_1	Q8WY41	5.94e-22	58	60.345
dd_Smed_v6_10485_0_1	Q8TD43	8.98e-19	99	25.253
dd_Smed_v6_10489_0_1	O75164	1.47e-111	172	60.465
dd_Smed_v6_1048_0_1	Q8TED4	3.2e-120	210	54.286
dd_Smed_v6_10491_1_1	Q8IYL2	1.95e-64	81	51.852
dd_Smed_v6_10495_0_1	Q6V0I7	6.6e-41	64	35.938
dd_Smed_v6_10497_0_1	Q86V85	0.000292	76	25
dd_Smed_v6_10498_0_1	Q9NQX3	1.52e-128	159	49.057
dd_Smed_v6_10499_0_1	P21860	4.36e-88	118	40.678
dd_Smed_v6_104_0_1	P62987	9.71e-20	76	46.053
dd_Smed_v6_10501_0_1	Q8N6V4	1.2e-14	51	52.941
dd_Smed_v6_10506_0_1	O15297	2.59e-52	97	41.237
dd_Smed_v6_10507_0_1	Q9NS00	3.13e-10	64	39.062
dd_Smed_v6_10508_0_1	Q7L592	6.02e-58	151	39.073
dd_Smed_v6_1050_0_1	P63000	3.22e-99	125	90.4
dd_Smed_v6_10510_0_1	Q96RU3	2.1e-07	75	28
dd_Smed_v6_10511_0_1	Q96CS3	2.29e-33	68	51.471
dd_Smed_v6_10513_0_1	O60344	6.42e-22	102	37.255
dd_Smed_v6_10515_0_1	Q13976	0	325	66.154
dd_Smed_v6_10518_0_1	Q16774	2.95e-49	184	44.022
dd_Smed_v6_10519_0_1	Q86U28	1.56e-32	105	50.476
dd_Smed_v6_1051_0_1	Q9NPA8	1.57e-32	87	56.322
dd_Smed_v6_10520_0_1	Q9UH99	5.44e-08	24	62.5
dd_Smed_v6_10522_0_1	P51172	3.58e-10	54	35.185
dd_Smed_v6_10523_0_1	Q92805	2.59e-20	75	44
dd_Smed_v6_10524_0_1	P35236	5.8e-06	50	38
dd_Smed_v6_10526_0_1	Q9C0B0	7.5e-110	137	59.854
dd_Smed_v6_10529_0_1	Q9GZR5	1.22e-69	243	41.975
dd_Smed_v6_1052_0_1	Q9ULA0	1.06e-158	140	58.571
dd_Smed_v6_10531_0_1	O14524	1.49e-18	76	34.211
dd_Smed_v6_10532_0_1	Q96JA1	3.06e-35	74	47.297
dd_Smed_v6_10533_0_1	Q8WY98	5.66e-09	78	33.333
dd_Smed_v6_10534_0_1	Q8N782	2.58e-18	68	42.647
dd_Smed_v6_10535_0_1	Q7Z6G8	7.06e-05	46	36.957
dd_Smed_v6_10539_0_1	Q9Y4K3	1.65e-08	51	31.373
dd_Smed_v6_1053_0_1	Q6ZNF0	1.32e-126	158	51.899
dd_Smed_v6_10540_0_1	Q6ZMW3	0	392	49.235
dd_Smed_v6_10541_0_1	P0C7P0	1.27e-18	30	63.333
dd_Smed_v6_10542_0_1	Q765P7	1.65e-25	66	37.879
dd_Smed_v6_10543_0_1	Q9NWH7	1.27e-14	78	37.179
dd_Smed_v6_10544_0_1	Q86VS3	0	422	44.076
dd_Smed_v6_10546_0_1	O60906	3.43e-18	57	43.86
dd_Smed_v6_10547_0_1	Q9NP72	3.1e-66	124	59.677
dd_Smed_v6_1054_0_1	Q9NZR2	4.77e-20	58	41.379
dd_Smed_v6_10554_0_1	Q53EV4	6.17e-23	61	54.098
dd_Smed_v6_10557_0_1	Q6P587	2.23e-37	126	44.444
dd_Smed_v6_10558_1_1	O14929	9.34e-40	150	36.667
dd_Smed_v6_10561_0_1	Q9BSC4	3.31e-58	166	34.337
dd_Smed_v6_10562_0_1	Q8TDR0	1.5e-68	128	56.25
dd_Smed_v6_10564_0_1	Q8N6T7	3.85e-91	89	59.551
dd_Smed_v6_10566_0_1	Q9H0A0	2.15e-151	123	45.528
dd_Smed_v6_10568_0_1	Q8WW36	1.02e-07	32	40.625
dd_Smed_v6_10569_0_1	Q9Y4K3	4.83e-11	51	31.373
dd_Smed_v6_1056_0_1	P62306	1.35e-37	76	80.263
dd_Smed_v6_10570_0_1	P61019	1.06e-91	203	66.01
dd_Smed_v6_10574_0_1	O95164	4.33e-19	42	45.238
dd_Smed_v6_10575_0_1	Q9UHY8	1.35e-17	70	40
dd_Smed_v6_10576_0_1	P14618	1.1e-178	322	63.043
dd_Smed_v6_10577_0_1	Q5TA45	0	377	71.088
dd_Smed_v6_10578_0_1	P56539	2.34e-18	116	34.483
dd_Smed_v6_10581_0_1	Q96AB6	3.77e-17	55	36.364
dd_Smed_v6_10582_0_1	Q8WYP3	9.09e-07	79	32.911
dd_Smed_v6_10585_0_1	O95185	1.69e-54	123	35.772
dd_Smed_v6_10587_0_1	Q10472	1.45e-126	207	44.928
dd_Smed_v6_1058_0_1	Q15084	2.93e-58	91	72.527
dd_Smed_v6_10591_0_1	Q9Y4K0	3.93e-65	82	52.439
dd_Smed_v6_10593_0_1	O60658	7.93e-113	196	54.082
dd_Smed_v6_10595_0_1	Q96FL8	2.79e-57	245	33.061
dd_Smed_v6_10598_0_1	Q9H6Q4	2.1e-68	52	51.923
dd_Smed_v6_10599_0_1	P16157	1.43e-34	202	32.178
dd_Smed_v6_1059_0_1	Q9UHA3	5.71e-35	139	45.324
dd_Smed_v6_105_0_1	Q9Y3U8	9.8e-30	92	57.609
dd_Smed_v6_10601_0_1	Q8IY33	4.39e-44	114	50
dd_Smed_v6_10602_0_1	P58743	1.22e-85	289	39.446
dd_Smed_v6_10605_0_1	Q6XR72	5.1e-09	75	29.333
dd_Smed_v6_10607_0_1	P98088	0.000129	118	26.271
dd_Smed_v6_10609_0_1	Q96KR4	8.69e-39	73	43.836
dd_Smed_v6_1060_0_1	P54886	0	113	72.566
dd_Smed_v6_10610_0_1	Q9BTW9	0	286	58.741
dd_Smed_v6_10611_0_1	Q8N9W6	1.36e-25	50	64
dd_Smed_v6_10612_0_1	Q8IVS2	1.47e-70	153	47.712
dd_Smed_v6_10613_0_1	Q8N4V2	4.01e-59	123	34.959
dd_Smed_v6_10614_0_1	Q969Q6	5.96e-179	331	65.861
dd_Smed_v6_10615_0_1	Q8N9B4	7.78e-108	276	55.435
dd_Smed_v6_10617_0_1	Q9BSC4	3.66e-54	160	35
dd_Smed_v6_10618_0_1	O43432	1.11e-28	64	43.75
dd_Smed_v6_1061_0_1	P35579	6.64e-06	109	22.936
dd_Smed_v6_10620_0_1	Q86YT6	1.74e-07	65	36.923
dd_Smed_v6_10622_0_1	Q96E29	9.7e-35	154	24.026
dd_Smed_v6_10624_0_1	P00533	1.83e-90	192	44.271
dd_Smed_v6_10625_0_1	Q9UBT7	2.43e-20	63	41.27
dd_Smed_v6_10628_0_1	Q7Z589	1.69e-26	93	53.763
dd_Smed_v6_1062_0_1	P10253	0	193	48.705
dd_Smed_v6_10632_0_1	Q86US8	3.6e-115	144	44.444
dd_Smed_v6_10633_0_1	Q9P2E3	0	190	45.789
dd_Smed_v6_10635_0_1	Q8TC05	1.37e-05	34	52.941
dd_Smed_v6_10636_0_1	Q15126	3.62e-24	46	47.826
dd_Smed_v6_10637_0_1	Q6GQQ9	1.9e-62	86	44.186
dd_Smed_v6_10638_0_1	Q9UG01	0	356	50.281
dd_Smed_v6_1063_0_1	P56545	2.48e-160	324	70.679
dd_Smed_v6_10640_0_1	Q6ZSS7	3.25e-101	145	55.172
dd_Smed_v6_10644_0_1	Q6P4H8	1.58e-29	71	46.479
dd_Smed_v6_10646_0_1	Q8NF91	5.28e-72	108	60.185
dd_Smed_v6_10647_0_1	Q9UJT9	1.03e-43	78	30.769
dd_Smed_v6_10656_0_1	Q7RTY1	1.96e-06	75	24
dd_Smed_v6_10657_0_1	Q9BU89	1.15e-62	150	45.333
dd_Smed_v6_10658_0_1	Q53HI1	2.29e-69	105	48.571
dd_Smed_v6_1065_0_1	Q14677	6.41e-59	164	60.366
dd_Smed_v6_10660_0_1	Q13569	4.11e-45	56	51.786
dd_Smed_v6_10662_0_1	O14512	1.19e-24	78	34.615
dd_Smed_v6_10666_0_1	Q9NS86	7.73e-75	134	57.463
dd_Smed_v6_10667_0_1	Q06203	1.17e-177	164	65.854
dd_Smed_v6_10669_0_1	Q9NNW5	1.12e-08	42	33.333
dd_Smed_v6_10670_0_1	Q9Y2G3	0	238	50.84
dd_Smed_v6_10671_0_1	O00471	2.54e-11	118	27.119
dd_Smed_v6_10672_0_1	Q15814	3.26e-52	157	44.586
dd_Smed_v6_10673_0_1	O14753	1.59e-51	138	54.348
dd_Smed_v6_10674_0_1	P23634	6.32e-118	122	81.148
dd_Smed_v6_10675_0_1	Q96I15	3.97e-72	87	54.023
dd_Smed_v6_10676_0_1	Q8TAF7	6.18e-59	240	37.083
dd_Smed_v6_10677_0_1	Q8N7X0	1.99e-100	49	65.306
dd_Smed_v6_10678_0_1	O75343	2.46e-54	93	51.613
dd_Smed_v6_10679_0_1	P62633	1.56e-06	37	43.243
dd_Smed_v6_1067_0_1	O75787	4.33e-14	68	44.118
dd_Smed_v6_10681_0_1	P41002	0.000208	77	29.87
dd_Smed_v6_10682_0_1	P10632	2.23e-36	133	30.827
dd_Smed_v6_10683_0_1	O15374	1.73e-26	171	27.485
dd_Smed_v6_10688_0_1	Q6WRI0	4.95e-06	22	50
dd_Smed_v6_10689_0_1	O60500	1.12e-35	71	42.254
dd_Smed_v6_10691_0_1	Q9UJM8	3.9e-88	139	49.64
dd_Smed_v6_10693_0_1	Q99755	3.11e-126	169	60.947
dd_Smed_v6_10696_0_1	Q9P2E3	1.33e-161	113	59.292
dd_Smed_v6_10698_0_1	Q7Z7H3	1.81e-23	176	30.682
dd_Smed_v6_1069_0_1	P10515	3.37e-130	129	72.868
dd_Smed_v6_106_0_1	P42677	1.71e-39	85	76.471
dd_Smed_v6_10700_0_1	Q9BRR8	7.92e-34	53	52.83
dd_Smed_v6_10703_0_1	A6H8Z2	1.82e-36	55	50.909
dd_Smed_v6_10704_0_1	Q15831	1.39e-66	165	41.818
dd_Smed_v6_10708_0_1	Q14790	4.27e-20	113	30.088
dd_Smed_v6_10709_0_1	Q9NWH2	7.35e-07	58	41.379
dd_Smed_v6_1070_0_1	P02461	7.16e-119	74	45.946
dd_Smed_v6_10711_0_1	Q96LD8	3.78e-09	35	51.429
dd_Smed_v6_10715_0_1	Q8N4P6	0.000485	36	50
dd_Smed_v6_10716_0_1	P35555	1.3e-62	43	46.512
dd_Smed_v6_10717_0_1	O94759	7.43e-17	56	42.857
dd_Smed_v6_10718_0_1	P55317	9.14e-63	122	77.869
dd_Smed_v6_10719_0_1	Q9NQC7	3.68e-09	87	28.736
dd_Smed_v6_1071_0_1	Q6UXI7	8.2e-21	186	26.344
dd_Smed_v6_10722_0_1	P11712	9.57e-16	45	37.778
dd_Smed_v6_10724_0_1	Q8NHS3	3.27e-58	90	41.111
dd_Smed_v6_10725_0_1	P51946	1.57e-23	83	36.145
dd_Smed_v6_10729_0_1	Q9NYJ7	2.88e-05	64	29.688
dd_Smed_v6_1072_0_1	Q8TEU8	1.06e-15	54	50
dd_Smed_v6_10730_0_1	Q6ZN44	1.6e-73	96	33.333
dd_Smed_v6_10731_0_1	Q16566	1.1e-106	138	52.174
dd_Smed_v6_10732_0_1	P12694	2.83e-126	363	49.862
dd_Smed_v6_10733_0_1	Q96I76	3.46e-16	65	36.923
dd_Smed_v6_10733_1_1	Q86UP8	1.18e-26	61	49.18
dd_Smed_v6_10734_0_1	Q86UR5	1.22e-89	80	65
dd_Smed_v6_10737_0_1	O94823	0	261	45.211
dd_Smed_v6_10738_0_1	Q02224	5.08e-11	116	23.276
dd_Smed_v6_10739_0_1	P09234	3.42e-08	42	45.238
dd_Smed_v6_1073_0_1	P17735	4.01e-135	265	53.962
dd_Smed_v6_10741_0_1	Q9H6Y7	1.81e-09	22	50
dd_Smed_v6_10742_0_1	Q9BYW2	5.04e-75	91	50.549
dd_Smed_v6_10744_0_1	Q8IYS1	2.73e-80	195	42.564
dd_Smed_v6_10745_0_1	Q8IVJ1	3.5e-25	69	40.58
dd_Smed_v6_10746_0_1	Q9Y493	2.54e-08	73	27.397
dd_Smed_v6_1074_0_1	O00429	8.27e-62	144	43.75
dd_Smed_v6_10750_1_1	Q9NS85	2.05e-39	63	46.032
dd_Smed_v6_10751_0_1	O94972	0	352	67.045
dd_Smed_v6_10752_0_1	Q8IXH7	7.05e-49	147	30.612
dd_Smed_v6_10754_0_1	Q99732	1.32e-15	33	48.485
dd_Smed_v6_10757_0_1	Q569K6	2.69e-34	104	43.269
dd_Smed_v6_1075_0_1	P61088	4.98e-82	147	82.313
dd_Smed_v6_10760_0_1	Q8NC67	7.01e-17	47	46.809
dd_Smed_v6_10761_0_1	Q9BSG0	1.3e-16	64	42.188
dd_Smed_v6_10762_0_1	P09493	1.14e-05	80	28.75
dd_Smed_v6_10764_0_1	Q9Y2G4	4.55e-40	152	40.789
dd_Smed_v6_10765_0_1	Q9P2E2	4.42e-28	124	38.71
dd_Smed_v6_10769_0_1	Q7RTY0	2.88e-20	52	42.308
dd_Smed_v6_10771_0_1	P57060	1.98e-34	105	43.81
dd_Smed_v6_10776_0_1	Q3ZCV2	3.56e-28	73	31.507
dd_Smed_v6_10777_0_1	Q86V48	0.000265	74	31.081
dd_Smed_v6_10778_0_1	Q96HU8	1.3e-73	109	79.817
dd_Smed_v6_1077_0_1	Q9NRX1	2.38e-23	74	43.243
dd_Smed_v6_10780_0_1	Q8N0W5	1.27e-35	61	62.295
dd_Smed_v6_10781_0_1	A6H8Y1	1.52e-08	52	40.385
dd_Smed_v6_10782_0_1	Q96HP4	3.24e-14	37	37.838
dd_Smed_v6_10784_0_1	O60573	1.71e-52	145	51.034
dd_Smed_v6_10785_0_1	P08572	1.56e-07	31	45.161
dd_Smed_v6_10787_0_1	Q9UH99	1.15e-51	154	44.805
dd_Smed_v6_10790_0_1	P63027	2.15e-33	80	71.25
dd_Smed_v6_10791_0_1	Q96CU9	5.16e-91	169	46.154
dd_Smed_v6_10792_0_1	Q01664	4.76e-06	41	41.463
dd_Smed_v6_10794_0_1	P23416	3.4e-67	109	42.202
dd_Smed_v6_10796_0_1	Q8IVS8	4.95e-36	139	42.446
dd_Smed_v6_10797_0_1	Q8WVE0	9.76e-34	47	51.064
dd_Smed_v6_10798_0_1	Q6NZY4	3.07e-15	49	51.02
dd_Smed_v6_1079_0_1	Q86T03	4.29e-33	72	65.278
dd_Smed_v6_107_0_1	P63167	9.44e-10	79	30.38
dd_Smed_v6_10802_0_1	Q14690	8.03e-43	151	35.099
dd_Smed_v6_10803_0_1	Q13489	1.05e-05	32	53.125
dd_Smed_v6_10804_0_1	Q9P260	2.03e-72	61	59.016
dd_Smed_v6_10806_0_1	Q8NBT0	1.54e-149	294	62.585
dd_Smed_v6_10808_0_1	P28715	1.12e-77	142	42.958
dd_Smed_v6_10811_0_1	Q6ZN18	2.87e-08	32	50
dd_Smed_v6_10812_0_1	Q9H0F7	5.51e-69	177	63.277
dd_Smed_v6_10813_0_1	P42785	1.26e-100	185	43.784
dd_Smed_v6_10815_0_1	P61129	1.04e-14	33	57.576
dd_Smed_v6_10816_0_1	P50750	1.63e-87	157	52.229
dd_Smed_v6_1081_0_1	Q9UIV1	1.23e-56	159	44.025
dd_Smed_v6_10820_0_1	Q99489	7.32e-39	44	52.273
dd_Smed_v6_10822_0_1	Q96NT5	2.46e-11	63	31.746
dd_Smed_v6_10823_0_1	Q9NS87	0.001	125	23.2
dd_Smed_v6_10824_0_1	Q96DT6	5.01e-42	92	36.957
dd_Smed_v6_10826_0_1	O75751	3.1e-62	133	36.09
dd_Smed_v6_10827_0_1	Q8IYD1	4.24e-09	102	28.431
dd_Smed_v6_10828_0_1	Q9P227	2.91e-36	111	36.036
dd_Smed_v6_10829_0_1	Q7RTY1	0.000202	39	35.897
dd_Smed_v6_1082_0_1	O75052	1.36e-36	66	48.485
dd_Smed_v6_10832_0_1	P09958	0	264	67.045
dd_Smed_v6_10833_0_1	Q9Y238	1.05e-150	136	48.529
dd_Smed_v6_10834_0_1	Q8IYG6	1.94e-53	151	54.967
dd_Smed_v6_10835_0_1	Q12955	0	278	53.597
dd_Smed_v6_10840_0_1	Q8NBI5	2.51e-17	70	40
dd_Smed_v6_10841_0_1	Q6UWE0	9.75e-46	151	27.815
dd_Smed_v6_10846_0_1	Q8TD57	0	501	58.683
dd_Smed_v6_10848_0_1	Q9P286	2.52e-110	233	61.373
dd_Smed_v6_10849_0_1	O60701	1.16e-174	193	63.212
dd_Smed_v6_10850_0_1	Q9Y4E6	4.51e-74	134	34.328
dd_Smed_v6_10851_0_1	Q8IWA0	2.46e-12	44	40.909
dd_Smed_v6_10857_0_1	Q6IQ26	5.34e-62	177	41.243
dd_Smed_v6_1085_0_1	Q8TBQ9	1.12e-19	68	75
dd_Smed_v6_10863_0_1	Q13148	9.81e-71	176	46.023
dd_Smed_v6_10866_0_1	Q16719	4.12e-119	226	57.965
dd_Smed_v6_10868_0_1	Q96RJ6	7.83e-27	67	76.119
dd_Smed_v6_10869_0_1	O95864	1.56e-130	175	43.429
dd_Smed_v6_1086_0_1	P56539	4.85e-18	93	40.86
dd_Smed_v6_10872_0_1	P18433	4.27e-06	50	36
dd_Smed_v6_10873_0_1	Q03252	3.07e-08	104	27.885
dd_Smed_v6_10876_0_1	O43257	3.26e-27	57	52.632
dd_Smed_v6_10879_0_1	O95395	8.41e-38	89	38.202
dd_Smed_v6_1087_0_1	Q92598	0	225	50.667
dd_Smed_v6_10881_0_1	Q9HBH5	7.14e-27	96	33.333
dd_Smed_v6_10882_0_1	O94888	2.39e-46	86	37.209
dd_Smed_v6_10883_0_1	Q92851	4.76e-28	111	36.036
dd_Smed_v6_10885_0_1	Q8N3J2	2.07e-45	120	40
dd_Smed_v6_10888_0_1	Q3V6T2	4.5e-05	79	24.051
dd_Smed_v6_10889_0_1	Q8TEU7	1.44e-59	77	36.364
dd_Smed_v6_1088_0_1	Q15582	7.9e-14	62	37.097
dd_Smed_v6_10890_0_1	O15084	4.75e-13	64	40.625
dd_Smed_v6_10891_0_1	Q9NZW4	3.28e-06	242	19.421
dd_Smed_v6_10892_0_1	O75751	3.46e-22	59	33.898
dd_Smed_v6_10893_0_1	Q5T0N1	0	262	40.84
dd_Smed_v6_10894_0_1	P62380	2.63e-20	79	41.772
dd_Smed_v6_10898_0_1	Q6NUK1	3.76e-104	209	42.105
dd_Smed_v6_10899_0_1	O60341	3.08e-13	57	47.368
dd_Smed_v6_1089_0_1	Q99623	5.68e-107	241	65.145
dd_Smed_v6_108_0_1	P62917	4.34e-134	253	73.518
dd_Smed_v6_10900_0_1	Q96PU8	4.05e-47	125	56
dd_Smed_v6_10901_0_1	Q4KMP7	2.45e-17	58	50
dd_Smed_v6_10902_0_1	Q14728	1.75e-60	117	45.299
dd_Smed_v6_10903_0_1	O76082	2e-33	92	34.783
dd_Smed_v6_10905_0_1	Q9NWU2	2.6e-29	106	40.566
dd_Smed_v6_10906_0_1	Q9Y4K3	9.7e-07	36	33.333
dd_Smed_v6_10911_0_1	O75346	3.62e-30	52	53.846
dd_Smed_v6_10917_0_1	P15918	9.77e-06	47	36.17
dd_Smed_v6_10921_0_1	P12755	3.41e-29	48	45.833
dd_Smed_v6_10924_0_1	Q01085	2.63e-63	96	52.083
dd_Smed_v6_10926_0_1	Q7Z3E5	5.07e-79	146	52.74
dd_Smed_v6_10927_0_1	Q9Y2C3	0.000129	51	33.333
dd_Smed_v6_10933_0_1	O15264	1.53e-39	64	53.125
dd_Smed_v6_10934_0_1	Q86VZ4	3.28e-07	24	62.5
dd_Smed_v6_10935_0_1	O00522	1.31e-11	120	24.167
dd_Smed_v6_10939_0_1	O15084	2.82e-37	176	31.25
dd_Smed_v6_1093_0_1	Q53H47	1.48e-15	119	32.773
dd_Smed_v6_10945_0_1	O60303	2.6e-165	151	61.589
dd_Smed_v6_10946_0_1	Q63HQ2	5.2e-31	115	31.304
dd_Smed_v6_10947_0_1	Q71U36	0	441	93.651
dd_Smed_v6_10949_0_1	Q9NVF9	2.91e-65	105	48.571
dd_Smed_v6_1094_0_1	Q9Y5Y2	4.31e-61	110	41.818
dd_Smed_v6_10952_0_1	Q16595	2.39e-30	101	49.505
dd_Smed_v6_10954_0_1	P08865	2.89e-09	63	41.27
dd_Smed_v6_10955_0_1	Q9NTG7	1.94e-89	187	49.733
dd_Smed_v6_10957_0_1	Q53H47	4.34e-05	63	30.159
dd_Smed_v6_10958_0_1	Q9UKQ2	6.09e-41	44	43.182
dd_Smed_v6_1095_0_1	P26583	4.76e-32	55	45.455
dd_Smed_v6_10962_0_1	Q7Z443	2.27e-55	107	42.056
dd_Smed_v6_10965_0_1	Q96L93	1.22e-38	92	57.609
dd_Smed_v6_10966_0_1	Q92630	0	394	70.558
dd_Smed_v6_10967_0_1	Q2TAC2	5.58e-12	152	26.316
dd_Smed_v6_10968_0_1	Q99571	2.19e-77	114	50.877
dd_Smed_v6_10969_0_1	Q9C0G6	0	316	53.481
dd_Smed_v6_1096_0_1	P15531	1.79e-62	149	60.403
dd_Smed_v6_10970_0_1	P17152	6.71e-21	63	36.508
dd_Smed_v6_10972_0_1	A6NCI4	0	182	41.758
dd_Smed_v6_10974_0_1	O43815	1.06e-102	74	63.514
dd_Smed_v6_10976_0_1	Q330K2	5.47e-26	67	38.806
dd_Smed_v6_10977_0_1	Q13017	6.45e-16	29	65.517
dd_Smed_v6_1097_0_1	Q96NW4	1.75e-13	108	31.481
dd_Smed_v6_10983_0_1	Q9UQ05	0	224	63.393
dd_Smed_v6_10984_0_1	Q9HCD6	6.6e-08	79	36.709
dd_Smed_v6_10985_0_1	Q8TCG2	2.45e-153	250	59.2
dd_Smed_v6_10986_0_1	Q9H2K2	2.1e-19	73	41.096
dd_Smed_v6_10987_0_1	Q8NEZ3	4.06e-148	306	61.111
dd_Smed_v6_10989_0_1	Q96C34	4.98e-71	153	45.098
dd_Smed_v6_1098_0_1	Q14764	0	227	63.436
dd_Smed_v6_10990_0_1	Q2M385	3.69e-115	203	35.961
dd_Smed_v6_10994_0_1	Q12926	2.65e-22	51	43.137
dd_Smed_v6_10996_0_1	O43390	5.72e-54	112	46.429
dd_Smed_v6_10997_0_1	O75928	4.3e-23	67	50.746
dd_Smed_v6_10999_0_1	Q969W0	1.27e-11	56	41.071
dd_Smed_v6_1099_0_1	P17707	3.85e-60	118	48.305
dd_Smed_v6_10_1_1	O75596	9.5e-07	64	29.688
dd_Smed_v6_11004_0_1	Q13002	3.67e-73	93	47.312
dd_Smed_v6_11005_0_1	Q9UPT6	2.81e-16	39	51.282
dd_Smed_v6_11006_0_1	O75717	1.42e-27	87	37.931
dd_Smed_v6_11008_0_1	Q9BX46	4.01e-41	90	78.889
dd_Smed_v6_1100_0_1	O15121	7.83e-139	317	57.098
dd_Smed_v6_11010_0_1	Q99578	8.66e-15	54	44.444
dd_Smed_v6_11012_0_1	Q6ZMV9	0	215	72.093
dd_Smed_v6_11013_0_1	P50747	3.52e-56	154	38.961
dd_Smed_v6_11014_0_1	Q9H336	1.33e-27	57	36.842
dd_Smed_v6_11017_0_1	Q92597	4.25e-13	72	30.556
dd_Smed_v6_11019_0_1	Q5JSJ4	7.48e-95	74	45.946
dd_Smed_v6_11023_0_1	O94921	2.31e-129	244	72.541
dd_Smed_v6_11024_0_1	P22455	3.17e-77	112	48.214
dd_Smed_v6_11025_0_1	Q9Y6I8	1.79e-29	46	52.174
dd_Smed_v6_11026_0_1	Q9BW83	7.36e-43	182	38.462
dd_Smed_v6_11027_0_1	Q96I13	6.93e-41	83	42.169
dd_Smed_v6_1102_0_1	P46379	6e-26	75	50.667
dd_Smed_v6_11034_0_1	Q9Y3Q4	8.47e-161	236	57.203
dd_Smed_v6_11037_0_1	Q96FJ2	3.98e-44	90	72.222
dd_Smed_v6_11039_0_1	P54750	8.09e-139	273	55.678
dd_Smed_v6_1103_0_1	P29972	1.37e-19	67	44.776
dd_Smed_v6_11041_0_1	Q14137	7.74e-61	92	43.478
dd_Smed_v6_11042_1_1	Q6ZV70	3.74e-60	70	54.286
dd_Smed_v6_11045_0_1	P62875	1.2e-09	25	88
dd_Smed_v6_11046_0_1	O95453	7.96e-27	79	43.038
dd_Smed_v6_11048_0_1	A8MT70	2.38e-20	45	53.333
dd_Smed_v6_1104_0_1	P20073	2.52e-90	158	53.165
dd_Smed_v6_11051_0_1	Q6ZMT1	2.28e-14	74	36.486
dd_Smed_v6_11053_0_1	Q96RJ6	1.08e-20	57	75.439
dd_Smed_v6_11054_0_1	Q14442	0.001	53	39.623
dd_Smed_v6_11059_0_1	Q9Y4K3	4.48e-08	58	31.034
dd_Smed_v6_11061_0_1	Q96A46	3.2e-74	133	48.12
dd_Smed_v6_11063_0_1	A6NDG6	2.45e-37	80	42.5
dd_Smed_v6_11066_0_1	Q8IW35	2.41e-83	236	50.424
dd_Smed_v6_11067_0_1	Q9NRP7	0	137	72.993
dd_Smed_v6_1106_0_1	P43004	3e-168	282	65.603
dd_Smed_v6_11070_0_1	Q5T4F7	2.88e-17	39	46.154
dd_Smed_v6_11071_0_1	Q9H0U4	4.26e-60	165	53.333
dd_Smed_v6_11072_0_1	Q86UP2	4.27e-05	148	20.27
dd_Smed_v6_11073_0_1	Q9P0U3	6.52e-50	97	44.33
dd_Smed_v6_11074_0_1	O96028	4.8e-113	185	47.568
dd_Smed_v6_11079_0_1	Q8IVF6	0.000606	42	35.714
dd_Smed_v6_1107_0_1	P22314	0	174	55.172
dd_Smed_v6_11084_0_1	Q9NS23	2.02e-06	43	46.512
dd_Smed_v6_11085_0_1	Q149M9	5.12e-42	74	41.892
dd_Smed_v6_11087_0_1	Q9BQI3	5.29e-36	49	38.776
dd_Smed_v6_11089_0_1	Q05D32	3.98e-87	205	64.39
dd_Smed_v6_11090_0_1	Q9UJV9	1.22e-67	135	67.407
dd_Smed_v6_11092_0_1	Q13255	0	165	46.061
dd_Smed_v6_11097_0_1	Q5W0A0	2.92e-17	96	30.208
dd_Smed_v6_11098_0_1	Q15649	1.18e-09	83	31.325
dd_Smed_v6_11099_0_1	Q9Y535	1.94e-38	135	46.667
dd_Smed_v6_1109_0_1	Q8NBH2	3.26e-20	50	40
dd_Smed_v6_110_0_1	P49207	2.13e-16	76	46.053
dd_Smed_v6_11100_0_1	Q12933	3.08e-24	81	41.975
dd_Smed_v6_11101_0_1	Q86V88	2.61e-26	94	42.553
dd_Smed_v6_11103_1_1	O75191	5.17e-90	222	41.441
dd_Smed_v6_11104_0_1	Q16611	0.000208	46	36.957
dd_Smed_v6_11106_0_1	O60931	6.07e-52	109	49.541
dd_Smed_v6_11107_0_1	Q9H845	9.56e-08	85	29.412
dd_Smed_v6_1110_0_1	Q13114	3.27e-42	123	39.024
dd_Smed_v6_11113_0_1	P11308	2.64e-57	101	87.129
dd_Smed_v6_11115_0_1	Q5VWQ8	6.38e-50	131	37.405
dd_Smed_v6_11117_0_1	Q96N64	0.000177	36	41.667
dd_Smed_v6_11118_0_1	Q8NB50	8.56e-22	69	34.783
dd_Smed_v6_1111_0_1	P30622	1.23e-05	117	24.786
dd_Smed_v6_11120_0_1	O15244	1.88e-22	53	32.075
dd_Smed_v6_11121_0_1	Q5VT97	2.39e-32	104	39.423
dd_Smed_v6_11122_0_1	Q9BRN9	1.12e-36	124	54.839
dd_Smed_v6_11123_0_1	Q96MS0	9.99e-39	84	34.524
dd_Smed_v6_11124_0_1	Q99615	1.86e-12	67	35.821
dd_Smed_v6_11127_0_1	Q8TBY9	1.56e-174	200	40
dd_Smed_v6_11128_0_1	Q8WWM7	0.000735	33	42.424
dd_Smed_v6_11130_0_1	Q96QT6	7.07e-52	46	58.696
dd_Smed_v6_11132_0_1	O15162	1.2e-12	53	45.283
dd_Smed_v6_11133_0_1	Q8N1G1	3.02e-26	103	46.602
dd_Smed_v6_11134_0_1	Q8TCP9	1.58e-15	65	41.538
dd_Smed_v6_11135_0_1	O76082	2.76e-37	109	32.11
dd_Smed_v6_1113_0_1	P61019	1.78e-124	211	86.73
dd_Smed_v6_11140_0_1	Q8N3C0	0	373	59.249
dd_Smed_v6_11141_0_1	O75808	3.92e-75	148	48.649
dd_Smed_v6_11142_0_1	P58743	1.78e-105	151	39.735
dd_Smed_v6_11145_0_1	O94762	3.81e-114	126	55.556
dd_Smed_v6_11146_0_1	Q9NQE9	6.93e-09	55	34.545
dd_Smed_v6_11148_0_1	Q9H0K1	1.69e-109	206	62.621
dd_Smed_v6_11149_0_1	P21675	0	222	46.396
dd_Smed_v6_1114_0_1	P32754	2.25e-159	302	61.921
dd_Smed_v6_11150_0_1	O95076	5.53e-23	79	55.696
dd_Smed_v6_11156_0_1	Q8N8Q1	1.37e-16	70	37.143
dd_Smed_v6_11157_0_1	Q7RTR2	1.05e-08	127	30.709
dd_Smed_v6_11158_0_1	O95922	0	344	68.023
dd_Smed_v6_1115_0_1	Q9Y5J9	1.18e-19	75	42.667
dd_Smed_v6_11160_0_1	Q68DX3	3.43e-13	49	38.776
dd_Smed_v6_11164_0_1	O43159	5.04e-36	99	42.424
dd_Smed_v6_11165_0_1	Q6P1X6	5.46e-30	75	48
dd_Smed_v6_11169_0_1	Q9Y2G8	2.88e-35	63	63.492
dd_Smed_v6_11170_0_1	P20226	2.2e-36	150	39.333
dd_Smed_v6_11172_0_1	P30793	6.2e-91	178	74.157
dd_Smed_v6_11175_0_1	O14893	0.000664	33	57.576
dd_Smed_v6_11176_0_1	Q9H7X7	2.34e-30	79	41.772
dd_Smed_v6_11177_0_1	Q5TCY1	1.19e-129	171	64.912
dd_Smed_v6_11179_0_1	Q9Y5B6	3.27e-33	86	32.558
dd_Smed_v6_11181_0_1	O15066	7.28e-94	168	74.405
dd_Smed_v6_11182_0_1	O15031	7.44e-18	78	37.179
dd_Smed_v6_11184_0_1	Q8IY17	0	193	61.14
dd_Smed_v6_11185_0_1	P78330	1.18e-60	139	51.079
dd_Smed_v6_11186_0_1	P57081	1.79e-14	55	45.455
dd_Smed_v6_11187_0_1	Q9P0K7	1.56e-27	193	25.389
dd_Smed_v6_11189_0_1	Q9P2K1	2.3e-160	63	53.968
dd_Smed_v6_1118_0_1	Q15046	0	251	58.964
dd_Smed_v6_11193_0_1	P55212	4.91e-16	52	38.462
dd_Smed_v6_11197_0_1	Q5VZY2	8.47e-44	76	36.842
dd_Smed_v6_11198_0_1	Q9C056	1.04e-35	90	65.556
dd_Smed_v6_11199_0_1	Q8IYR0	0	492	54.268
dd_Smed_v6_111_0_1	P62888	3.72e-34	94	58.511
dd_Smed_v6_11200_0_1	Q9UHR6	3.89e-10	18	55.556
dd_Smed_v6_11201_0_1	P98168	2.81e-12	97	24.742
dd_Smed_v6_11206_0_1	P43004	2.98e-65	150	48.667
dd_Smed_v6_11210_0_1	Q8NA29	4.8e-65	84	38.095
dd_Smed_v6_11211_0_1	Q15334	0.000323	14	78.571
dd_Smed_v6_11212_1_1	Q9Y5B0	3.89e-48	124	47.581
dd_Smed_v6_11213_0_1	O95140	3.14e-06	56	35.714
dd_Smed_v6_11214_0_1	Q9Y234	9.79e-34	76	51.316
dd_Smed_v6_11216_0_1	Q8NBS3	5.49e-134	147	50.34
dd_Smed_v6_1121_0_1	P18124	5.6e-42	204	32.353
dd_Smed_v6_11223_0_1	Q14517	5.65e-51	101	31.683
dd_Smed_v6_11226_0_1	O95279	3.14e-17	48	45.833
dd_Smed_v6_11228_0_1	P50607	5.29e-115	145	71.724
dd_Smed_v6_1122_0_1	Q01082	0	411	51.095
dd_Smed_v6_11231_0_1	Q14714	7.56e-08	105	23.81
dd_Smed_v6_11232_0_1	P50993	3.13e-47	90	41.111
dd_Smed_v6_11234_0_1	Q9Y2Z4	8.56e-62	200	43
dd_Smed_v6_11236_0_1	P08908	4.05e-70	103	59.223
dd_Smed_v6_11237_0_1	Q9ULK5	3.34e-53	91	47.253
dd_Smed_v6_11238_0_1	P20813	3.83e-52	134	38.06
dd_Smed_v6_11239_0_1	Q9UJ78	8.38e-09	52	42.308
dd_Smed_v6_1123_0_1	Q9UHL4	1.83e-99	115	43.478
dd_Smed_v6_11240_0_1	Q8NI51	4.76e-08	71	26.761
dd_Smed_v6_11241_0_1	Q9H993	7.22e-47	69	44.928
dd_Smed_v6_11243_0_1	Q96DM1	1.35e-15	21	61.905
dd_Smed_v6_11245_0_1	Q6SPF0	7.57e-35	74	52.703
dd_Smed_v6_11246_0_1	Q9NQX4	1.26e-05	74	28.378
dd_Smed_v6_11249_0_1	O60264	9.3e-11	61	39.344
dd_Smed_v6_11251_0_1	Q9UQ10	8.65e-07	95	24.211
dd_Smed_v6_11252_0_1	Q14678	8.56e-48	94	55.319
dd_Smed_v6_11254_0_1	Q96RD6	5.03e-07	73	30.137
dd_Smed_v6_11258_0_1	Q9NQR1	2.09e-10	46	52.174
dd_Smed_v6_11259_0_1	O94759	1.58e-61	80	30
dd_Smed_v6_1125_0_1	Q9BX40	1.59e-43	99	64.646
dd_Smed_v6_11261_0_1	Q8WTX9	2.73e-42	61	52.459
dd_Smed_v6_11263_0_1	O43929	1.65e-57	87	47.126
dd_Smed_v6_11265_0_1	P06493	1.85e-105	158	53.797
dd_Smed_v6_11266_0_1	Q6WRI0	4.77e-10	39	43.59
dd_Smed_v6_11269_0_1	P31321	2.47e-07	70	37.143
dd_Smed_v6_1126_0_1	Q8TF09	1.9e-39	92	70.652
dd_Smed_v6_11270_0_1	P56962	1.64e-09	102	26.471
dd_Smed_v6_11271_0_1	O94768	1.03e-38	132	39.394
dd_Smed_v6_11273_0_1	P0C870	3.77e-13	47	31.915
dd_Smed_v6_11274_0_1	Q9UJT0	2.68e-131	160	65
dd_Smed_v6_11277_0_1	Q6V702	1.11e-89	212	62.264
dd_Smed_v6_11279_0_1	Q96SZ6	9.75e-166	216	61.111
dd_Smed_v6_1127_0_1	Q14749	4.06e-101	116	71.552
dd_Smed_v6_11280_0_1	Q96J84	5.13e-13	108	30.556
dd_Smed_v6_11282_0_1	Q53H47	1e-07	28	46.429
dd_Smed_v6_11283_0_1	Q8NBN7	2.23e-21	44	43.182
dd_Smed_v6_11285_0_1	Q8WZ42	6.42e-09	37	40.541
dd_Smed_v6_11287_0_1	P22676	1.65e-46	39	66.667
dd_Smed_v6_11289_0_1	Q9ULV0	0	317	47.003
dd_Smed_v6_11291_0_1	Q6TDU7	3.81e-90	141	37.589
dd_Smed_v6_11293_0_1	Q9P2W9	5e-16	110	30.909
dd_Smed_v6_11294_0_1	Q15843	7.36e-11	76	35.526
dd_Smed_v6_11295_1_1	Q9UQB9	9.02e-33	91	29.67
dd_Smed_v6_11296_0_1	Q8TEW0	1.5e-35	59	59.322
dd_Smed_v6_11299_0_1	O94813	4.53e-10	52	40.385
dd_Smed_v6_112_0_1	P23528	2.69e-06	47	38.298
dd_Smed_v6_11300_0_1	Q96RY7	0	333	49.85
dd_Smed_v6_11303_0_1	Q15363	1.18e-28	113	42.478
dd_Smed_v6_11304_0_1	Q9BX46	9.57e-43	93	77.419
dd_Smed_v6_11305_0_1	P52569	1.27e-23	101	43.564
dd_Smed_v6_11306_0_1	Q9UGJ1	3.96e-75	123	35.772
dd_Smed_v6_11308_0_1	Q9H5U6	3.99e-50	86	37.209
dd_Smed_v6_1130_0_1	Q13530	1.2e-109	145	57.241
dd_Smed_v6_11310_0_1	P00533	2.68e-127	254	50.787
dd_Smed_v6_11311_0_1	Q12926	1.72e-68	127	69.291
dd_Smed_v6_11312_0_1	A6NHQ2	4.71e-46	58	53.448
dd_Smed_v6_11313_0_1	Q86Y38	5.65e-85	170	48.235
dd_Smed_v6_11314_0_1	Q96PX1	0.000871	32	40.625
dd_Smed_v6_11317_0_1	O15084	1.98e-21	100	29
dd_Smed_v6_11318_0_1	Q96GX1	3.9e-06	27	55.556
dd_Smed_v6_1131_0_1	P26038	4.37e-150	206	55.34
dd_Smed_v6_11320_0_1	P20711	5.28e-140	166	54.217
dd_Smed_v6_11322_0_1	Q96NY9	2.75e-24	69	49.275
dd_Smed_v6_11323_0_1	Q9GZU8	1.82e-09	56	46.429
dd_Smed_v6_11324_0_1	Q9NWL6	2.26e-78	106	67.925
dd_Smed_v6_11327_0_1	Q9H4G4	3.33e-19	40	42.5
dd_Smed_v6_11329_0_1	Q15051	5.91e-22	133	30.827
dd_Smed_v6_1132_0_1	P09327	8e-39	68	45.588
dd_Smed_v6_11330_0_1	Q12908	2.66e-41	166	39.157
dd_Smed_v6_11334_0_1	Q9UQ13	5.79e-23	129	32.558
dd_Smed_v6_11337_0_1	O00409	6.75e-31	94	51.064
dd_Smed_v6_1133_0_1	O94817	1.78e-29	98	47.959
dd_Smed_v6_11341_0_1	Q9NT99	6.29e-07	53	35.849
dd_Smed_v6_11342_0_1	P23415	6.19e-71	110	51.818
dd_Smed_v6_11344_0_1	Q5ST30	4.42e-143	249	40.562
dd_Smed_v6_11345_0_1	Q9Y5F2	6.68e-46	110	28.182
dd_Smed_v6_11349_0_1	Q8N6W0	9.41e-90	125	58.4
dd_Smed_v6_1134_0_1	Q13823	3.14e-85	126	57.143
dd_Smed_v6_11351_0_1	Q13905	1.43e-08	45	42.222
dd_Smed_v6_11353_0_1	Q8TBP6	8.96e-70	59	62.712
dd_Smed_v6_11354_0_1	Q9Y4K3	7.15e-13	54	37.037
dd_Smed_v6_11356_0_1	P17612	5.23e-43	68	57.353
dd_Smed_v6_11357_0_1	P63000	2.16e-43	99	58.586
dd_Smed_v6_11358_0_1	Q9Y6J8	5.25e-73	189	43.915
dd_Smed_v6_11359_0_1	Q69YN2	1.02e-86	95	45.263
dd_Smed_v6_1135_0_1	P09622	0	242	74.793
dd_Smed_v6_11363_0_1	P49917	3.33e-146	295	41.695
dd_Smed_v6_11365_0_1	P54198	2.15e-139	100	51
dd_Smed_v6_11366_0_1	Q96PY6	7.88e-108	266	57.143
dd_Smed_v6_11367_0_1	P0C7I0	6.96e-05	22	54.545
dd_Smed_v6_1136_0_1	P62877	1.1e-63	104	84.615
dd_Smed_v6_11370_0_1	Q96RK4	8.57e-115	322	53.416
dd_Smed_v6_11371_0_1	Q96M95	0.000265	83	26.506
dd_Smed_v6_11372_0_1	Q99502	2.18e-142	172	77.326
dd_Smed_v6_11375_0_1	P27701	1.57e-13	31	48.387
dd_Smed_v6_11376_0_1	Q96FL8	1.2e-88	413	36.562
dd_Smed_v6_11377_0_1	Q7Z4N2	4.61e-170	203	49.261
dd_Smed_v6_11378_0_1	Q92989	3.49e-09	31	45.161
dd_Smed_v6_1137_0_1	Q9NQC7	5.72e-31	168	26.786
dd_Smed_v6_11382_0_1	Q9NRF2	8.1e-30	64	76.562
dd_Smed_v6_11385_0_1	Q9Y219	6.12e-09	36	36.111
dd_Smed_v6_11386_0_1	A1L162	9.53e-05	61	34.426
dd_Smed_v6_11387_0_1	P51957	2.31e-97	136	58.824
dd_Smed_v6_11388_0_1	O60381	3.97e-05	44	40.909
dd_Smed_v6_11389_0_1	Q9H840	0.000691	68	32.353
dd_Smed_v6_11390_0_1	Q14562	5.75e-78	105	52.381
dd_Smed_v6_11392_0_1	Q96AG3	6.63e-68	195	36.923
dd_Smed_v6_11393_1_1	Q9UI46	1.84e-34	86	45.349
dd_Smed_v6_11394_0_1	O14795	0	320	75.312
dd_Smed_v6_11396_0_1	Q8TD08	2.9e-122	142	69.014
dd_Smed_v6_11397_0_1	Q6DWJ6	2.72e-07	55	36.364
dd_Smed_v6_11399_0_1	Q9BUX1	1.19e-11	43	41.86
dd_Smed_v6_1139_0_1	Q12933	2.54e-28	89	46.067
dd_Smed_v6_113_0_1	P62899	7.25e-49	98	76.531
dd_Smed_v6_11400_0_1	O00238	4.07e-35	53	54.717
dd_Smed_v6_11401_0_1	A0JNW5	9.31e-84	79	53.165
dd_Smed_v6_11402_0_1	Q4VXU2	0.000135	61	31.148
dd_Smed_v6_11404_0_1	Q12981	1.28e-06	81	29.63
dd_Smed_v6_11405_0_1	Q96AE7	3.92e-53	123	37.398
dd_Smed_v6_11406_0_1	Q33E94	2.44e-48	94	53.191
dd_Smed_v6_11408_0_1	P00749	0.000495	31	51.613
dd_Smed_v6_11409_0_1	P43146	5.91e-23	65	26.154
dd_Smed_v6_1140_0_1	Q14204	0	795	66.164
dd_Smed_v6_11417_0_1	P27695	3.09e-78	132	57.576
dd_Smed_v6_1141_0_1	P54108	8.71e-05	55	32.727
dd_Smed_v6_11425_0_1	Q68CZ1	7.3e-134	141	46.809
dd_Smed_v6_11428_0_1	Q3SYG4	1.94e-83	88	44.318
dd_Smed_v6_11429_0_1	Q13464	1.13e-105	125	49.6
dd_Smed_v6_1142_0_1	Q9NPQ8	1.73e-27	58	55.172
dd_Smed_v6_11434_0_1	P43246	1.34e-168	193	61.14
dd_Smed_v6_11436_0_1	Q6NSI8	7.28e-80	75	62.667
dd_Smed_v6_11439_0_1	Q9BUK6	1.81e-23	97	37.113
dd_Smed_v6_1143_0_1	Q9BW91	5.35e-82	140	55
dd_Smed_v6_11440_0_1	Q8NFU0	2.45e-38	47	38.298
dd_Smed_v6_11441_0_1	Q9NXG2	4.22e-07	30	46.667
dd_Smed_v6_11443_0_1	Q9BTT6	1.18e-22	175	32
dd_Smed_v6_11444_0_1	Q9H9S5	9.31e-05	41	39.024
dd_Smed_v6_11447_0_1	O60494	1.57e-19	51	33.333
dd_Smed_v6_11448_0_1	O15269	4.66e-20	115	28.696
dd_Smed_v6_11450_0_1	Q8IVS2	1.38e-70	153	43.137
dd_Smed_v6_11452_0_1	Q9Y4K0	6.02e-52	72	52.778
dd_Smed_v6_11453_0_1	Q92831	2.28e-123	136	67.647
dd_Smed_v6_11458_0_1	Q96CB9	3.84e-41	83	46.988
dd_Smed_v6_11459_0_1	Q5GJ75	1.23e-19	86	36.047
dd_Smed_v6_1145_0_1	O60551	5.36e-161	224	65.179
dd_Smed_v6_11461_0_1	Q03933	1.62e-06	27	66.667
dd_Smed_v6_11462_0_1	Q86TZ1	1.27e-79	199	36.181
dd_Smed_v6_11463_0_1	Q6L8Q7	3.97e-31	61	52.459
dd_Smed_v6_11464_0_1	Q9UPR3	3.22e-41	134	30.597
dd_Smed_v6_11465_0_1	Q9UKG9	7.81e-74	81	44.444
dd_Smed_v6_11466_0_1	Q149M9	2.92e-08	34	50
dd_Smed_v6_11468_0_1	P0DMQ5	1.94e-09	31	70.968
dd_Smed_v6_1146_0_1	P84090	3.05e-42	97	65.979
dd_Smed_v6_11471_0_1	Q8N2C7	8.9e-122	85	40
dd_Smed_v6_11475_0_1	Q92878	1.52e-120	139	58.993
dd_Smed_v6_11476_0_1	P82094	0.000463	63	23.81
dd_Smed_v6_11478_0_1	P28328	2.47e-13	41	41.463
dd_Smed_v6_1147_0_1	O14776	1.01e-76	61	67.213
dd_Smed_v6_11480_0_1	Q15326	7.02e-08	32	50
dd_Smed_v6_11481_0_1	Q14957	3.67e-92	154	48.701
dd_Smed_v6_11484_0_1	Q92979	1.25e-20	70	38.571
dd_Smed_v6_11485_0_1	P00395	0	305	88.525
dd_Smed_v6_11486_0_1	Q6ZSM3	8.75e-08	51	35.294
dd_Smed_v6_11487_0_1	P14635	3.77e-06	74	31.081
dd_Smed_v6_11488_0_1	P30559	0.000395	35	37.143
dd_Smed_v6_1148_0_1	Q9HB07	1.31e-95	135	57.037
dd_Smed_v6_11491_0_1	O94886	1.84e-18	50	38
dd_Smed_v6_11492_0_1	Q6IE81	2.64e-64	95	42.105
dd_Smed_v6_11493_0_1	P48764	3.94e-42	58	53.448
dd_Smed_v6_11495_0_1	Q9H3H1	2.3e-54	126	45.238
dd_Smed_v6_1149_0_1	Q99460	0	383	63.185
dd_Smed_v6_114_0_1	P16989	1.51e-29	93	54.839
dd_Smed_v6_11500_0_1	P78413	3.56e-42	75	86.667
dd_Smed_v6_11505_0_1	Q2WGJ6	1.38e-08	73	35.616
dd_Smed_v6_11507_0_1	O60287	8.81e-19	95	28.421
dd_Smed_v6_1150_0_1	Q5TGZ0	7.86e-06	30	46.667
dd_Smed_v6_11510_0_1	Q92759	1.88e-35	86	36.047
dd_Smed_v6_11513_1_1	O76054	6.29e-72	176	37.5
dd_Smed_v6_11514_0_1	Q9UKN5	1.27e-06	43	44.186
dd_Smed_v6_11519_0_1	Q2M1K9	3.12e-08	55	23.636
dd_Smed_v6_1151_0_1	P0CG47	2.62e-06	68	29.412
dd_Smed_v6_11520_0_1	P13796	4.49e-27	54	55.556
dd_Smed_v6_11521_0_1	Q9H2C1	7.12e-77	117	62.393
dd_Smed_v6_11522_0_1	Q8TCD6	0.000473	20	35
dd_Smed_v6_11523_0_1	Q5JU67	9.58e-45	240	32.5
dd_Smed_v6_11524_0_1	Q9C0F1	1.25e-11	140	25.714
dd_Smed_v6_11525_0_1	Q9HBR0	1.88e-36	91	35.165
dd_Smed_v6_11527_0_1	Q53EV4	2.32e-62	121	49.587
dd_Smed_v6_11533_0_1	O94813	4.89e-06	46	41.304
dd_Smed_v6_11534_0_1	Q6PJF5	2.18e-116	185	55.676
dd_Smed_v6_11535_0_1	P83111	8.25e-36	125	43.2
dd_Smed_v6_1153_0_1	O94906	0	524	54.962
dd_Smed_v6_11540_0_1	Q86YQ8	4.2e-123	104	56.731
dd_Smed_v6_11544_0_1	O00255	1.16e-48	79	39.241
dd_Smed_v6_11546_0_1	P35251	1.94e-141	179	41.341
dd_Smed_v6_11547_0_1	Q8NA19	4.51e-83	96	45.833
dd_Smed_v6_1154_0_1	P28066	2.18e-105	238	65.546
dd_Smed_v6_11550_0_1	O75167	6.59e-39	120	52.5
dd_Smed_v6_11552_0_1	Q9NUQ8	1.72e-90	200	41
dd_Smed_v6_11553_0_1	C9JJ37	1.06e-34	92	39.13
dd_Smed_v6_11554_0_1	Q8WZ42	2.34e-07	34	50
dd_Smed_v6_11556_0_1	P20749	0.000357	60	35
dd_Smed_v6_11557_0_1	Q8N157	4.05e-96	59	49.153
dd_Smed_v6_11558_0_1	P49642	2.27e-105	168	61.905
dd_Smed_v6_11559_0_1	Q96RS0	3.79e-22	87	37.931
dd_Smed_v6_1155_0_1	P11226	6.04e-12	61	42.623
dd_Smed_v6_11561_0_1	P06241	6.51e-169	209	59.33
dd_Smed_v6_11562_0_1	Q13114	2.62e-08	41	39.024
dd_Smed_v6_11565_0_1	Q5XG87	6.98e-78	91	59.341
dd_Smed_v6_11566_0_1	P35579	6.06e-29	63	58.73
dd_Smed_v6_1156_0_1	Q96GC9	6.72e-86	119	49.58
dd_Smed_v6_11571_0_1	Q5VWP2	2.07e-69	133	57.895
dd_Smed_v6_11572_0_1	Q9BY32	7.36e-30	87	48.276
dd_Smed_v6_11573_0_1	Q96I59	3.85e-66	98	38.776
dd_Smed_v6_11576_0_1	Q9BPZ7	2.12e-15	39	43.59
dd_Smed_v6_11579_0_1	Q9BZA7	1.57e-68	146	36.301
dd_Smed_v6_1157_0_1	P53597	2.41e-146	300	74
dd_Smed_v6_11580_0_1	Q9UBS8	1.08e-38	59	49.153
dd_Smed_v6_11582_0_1	O15182	3.95e-60	89	71.91
dd_Smed_v6_11583_0_1	Q2NKX8	1.41e-127	116	55.172
dd_Smed_v6_11586_0_1	Q96H72	9.78e-61	89	71.91
dd_Smed_v6_11587_0_1	Q03252	0.001	115	22.609
dd_Smed_v6_1158_0_1	Q9NZZ3	6.63e-66	180	68.889
dd_Smed_v6_11591_0_1	P16157	4.05e-22	126	36.508
dd_Smed_v6_11593_0_1	Q96QE3	5.83e-14	61	39.344
dd_Smed_v6_11594_0_1	P15309	3.99e-33	52	42.308
dd_Smed_v6_11598_0_1	P49840	2.6e-97	260	53.077
dd_Smed_v6_1159_0_1	Q4U2R8	2.85e-25	180	27.222
dd_Smed_v6_11601_0_1	Q96PU8	4.16e-25	99	44.444
dd_Smed_v6_11602_0_1	Q8IZ69	1.99e-83	87	52.874
dd_Smed_v6_11605_0_1	Q9HCL0	1.05e-38	54	44.444
dd_Smed_v6_11608_0_1	P04626	5.47e-43	165	26.061
dd_Smed_v6_11611_0_1	O15084	2.85e-22	130	32.308
dd_Smed_v6_11616_0_1	Q86VD7	9.07e-69	99	50.505
dd_Smed_v6_11619_0_1	Q8IZQ8	1.31e-05	46	43.478
dd_Smed_v6_1161_0_1	Q96RW7	0	178	47.191
dd_Smed_v6_11622_0_1	Q9UPZ6	1.98e-08	53	37.736
dd_Smed_v6_11623_0_1	P08397	1.48e-48	98	51.02
dd_Smed_v6_11626_0_1	Q7RTX9	1.99e-32	93	33.333
dd_Smed_v6_11627_0_1	Q99986	8.03e-53	98	45.918
dd_Smed_v6_11629_0_1	Q5T9L3	2.8e-20	63	41.27
dd_Smed_v6_11630_0_1	Q16572	6.05e-143	150	59.333
dd_Smed_v6_11633_0_1	Q9BZA7	1.79e-61	123	31.707
dd_Smed_v6_11635_0_1	Q6T310	2.68e-08	96	30.208
dd_Smed_v6_11639_0_1	P62633	9.73e-08	38	47.368
dd_Smed_v6_1163_0_1	Q9Y4K3	1.65e-08	44	31.818
dd_Smed_v6_11641_0_1	Q8N490	5.56e-14	115	26.957
dd_Smed_v6_11642_0_1	Q96DP5	3.63e-36	79	53.165
dd_Smed_v6_11644_0_1	Q9UPP2	2.44e-40	169	23.669
dd_Smed_v6_11647_0_1	Q96SL8	3.62e-09	49	30.612
dd_Smed_v6_1164_0_1	Q14554	4.29e-05	28	57.143
dd_Smed_v6_11650_0_1	Q9ULV1	4.05e-101	202	46.535
dd_Smed_v6_11651_0_1	Q9H8M7	1.31e-75	164	42.683
dd_Smed_v6_11652_0_1	Q06190	1.12e-125	176	53.977
dd_Smed_v6_11653_0_1	Q92832	9.49e-50	59	54.237
dd_Smed_v6_11655_0_1	P08514	1.88e-16	38	47.368
dd_Smed_v6_11657_0_1	Q7Z2Q7	1.71e-08	87	32.184
dd_Smed_v6_1165_0_1	P47756	4.74e-114	135	77.778
dd_Smed_v6_11660_0_1	P54253	5.92e-14	71	38.028
dd_Smed_v6_11663_0_1	P16157	9.57e-53	184	30.978
dd_Smed_v6_11668_0_1	Q96EB1	2.84e-15	69	43.478
dd_Smed_v6_11669_0_1	Q5S007	3.94e-18	38	34.211
dd_Smed_v6_1166_0_1	P63172	4.84e-60	114	77.193
dd_Smed_v6_11672_0_1	O60271	1.73e-41	100	45
dd_Smed_v6_11674_0_1	P23443	7.6e-115	133	67.669
dd_Smed_v6_11678_0_1	Q96F25	5.56e-26	63	50.794
dd_Smed_v6_11679_0_1	O95260	1.21e-64	72	48.611
dd_Smed_v6_1167_0_1	P42574	4.1e-55	95	44.211
dd_Smed_v6_11680_0_1	Q9C0B9	1.81e-12	48	45.833
dd_Smed_v6_11681_0_1	Q8IYK4	2.23e-84	136	38.235
dd_Smed_v6_11682_0_1	Q9NUQ7	2.7e-61	134	55.97
dd_Smed_v6_11683_0_1	P00918	1.62e-25	40	52.5
dd_Smed_v6_11684_0_1	Q8IY26	4.33e-21	67	38.806
dd_Smed_v6_11689_0_1	C9J069	3.21e-30	65	52.308
dd_Smed_v6_1168_0_1	Q7L5Y9	9.34e-24	64	40.625
dd_Smed_v6_11692_0_1	Q9C0H5	2.46e-16	52	42.308
dd_Smed_v6_11693_0_1	Q13207	4.49e-118	200	81
dd_Smed_v6_11695_0_1	Q9BYT3	8.61e-53	99	36.364
dd_Smed_v6_11699_0_1	P0CG48	2.06e-17	79	43.038
dd_Smed_v6_1169_0_1	Q9Y5S9	3.78e-55	146	56.164
dd_Smed_v6_116_0_1	Q96FJ2	1.24e-51	90	90
dd_Smed_v6_11702_0_1	Q8N6G6	1.41e-24	42	40.476
dd_Smed_v6_1170_0_1	Q9BXW7	8.13e-82	143	53.147
dd_Smed_v6_11710_0_1	A6NFQ2	1.17e-16	81	40.741
dd_Smed_v6_11711_0_1	Q6PHR2	1.13e-74	226	50.885
dd_Smed_v6_11713_0_1	Q8IY51	6.18e-12	44	38.636
dd_Smed_v6_11714_0_1	O75469	1.27e-28	49	48.98
dd_Smed_v6_11717_0_1	Q9NS87	1.97e-94	232	58.19
dd_Smed_v6_11718_0_1	Q8IYD8	2.91e-132	150	60.667
dd_Smed_v6_11719_0_1	Q8N2A8	2.04e-12	60	46.667
dd_Smed_v6_1171_0_1	Q86YT5	2.7e-47	121	37.19
dd_Smed_v6_11720_0_1	Q8N8U2	1.32e-53	173	37.572
dd_Smed_v6_11722_0_1	Q969S6	6.57e-09	65	33.846
dd_Smed_v6_11723_0_1	Q9Y496	1.39e-29	47	76.596
dd_Smed_v6_11724_0_1	Q9NZC7	8.92e-25	70	34.286
dd_Smed_v6_11725_0_1	Q86UW7	0	128	67.188
dd_Smed_v6_11728_0_1	Q96MI9	0	153	64.706
dd_Smed_v6_11729_0_1	P11940	0	128	80.469
dd_Smed_v6_1172_0_1	Q9HAV7	1.47e-43	108	49.074
dd_Smed_v6_11730_0_1	Q9NQ40	3.68e-63	135	35.556
dd_Smed_v6_11734_0_1	O14841	5.51e-154	209	56.459
dd_Smed_v6_11735_0_1	Q7RTN6	1.03e-13	62	37.097
dd_Smed_v6_11736_0_1	Q96EP1	1.33e-44	93	35.484
dd_Smed_v6_11741_0_1	O75752	1.29e-21	47	51.064
dd_Smed_v6_11742_0_1	A6QL64	4.81e-05	69	30.435
dd_Smed_v6_11743_0_1	Q9ULH0	1.02e-21	71	36.62
dd_Smed_v6_11744_0_1	Q96JQ0	6.29e-55	209	28.708
dd_Smed_v6_11746_0_1	Q8WXH5	2.1e-33	72	58.333
dd_Smed_v6_11747_0_1	Q96MW7	2.8e-09	39	48.718
dd_Smed_v6_11748_0_1	Q9NS61	1.53e-45	180	39.444
dd_Smed_v6_1174_0_1	P46977	0	430	73.953
dd_Smed_v6_11751_0_1	O00463	0.000312	37	40.541
dd_Smed_v6_11753_0_1	Q9Y6N9	7.66e-10	47	36.17
dd_Smed_v6_11754_0_1	Q8TED0	5.48e-08	79	26.582
dd_Smed_v6_11756_0_1	Q13153	9.76e-22	103	33.981
dd_Smed_v6_11757_0_1	P0C2W1	2.43e-75	110	55.455
dd_Smed_v6_11759_0_1	Q9UEY8	5.24e-08	34	44.118
dd_Smed_v6_11764_0_1	Q9H814	5.14e-18	76	51.316
dd_Smed_v6_11766_0_1	Q9HCP0	9.97e-106	169	83.432
dd_Smed_v6_11767_0_1	P16066	0	247	68.016
dd_Smed_v6_11769_0_1	Q9NRD5	8.13e-115	319	53.918
dd_Smed_v6_1176_0_1	P62195	0	396	86.616
dd_Smed_v6_11770_0_1	Q6ZRR9	7.63e-23	81	44.444
dd_Smed_v6_11772_0_1	Q9C098	3.23e-55	153	56.863
dd_Smed_v6_11774_0_1	Q02742	5.87e-09	58	37.931
dd_Smed_v6_11775_0_1	O14802	0	136	55.147
dd_Smed_v6_11778_0_1	Q8NE09	2.09e-19	56	42.857
dd_Smed_v6_1177_0_1	Q08170	6.84e-06	33	36.364
dd_Smed_v6_11780_0_1	P35236	8.62e-05	50	32
dd_Smed_v6_11786_0_1	Q63HM9	3.49e-45	90	41.111
dd_Smed_v6_11787_0_1	P51168	3.43e-21	80	25
dd_Smed_v6_11790_0_1	Q14696	6.6e-21	118	33.051
dd_Smed_v6_1179_0_1	P50993	0	977	74.207
dd_Smed_v6_117_0_1	P46783	4.14e-32	61	68.852
dd_Smed_v6_11800_0_1	A2RUB6	4.73e-12	73	28.767
dd_Smed_v6_11801_0_1	Q14562	2.03e-73	223	49.776
dd_Smed_v6_11802_0_1	P26196	0	287	70.383
dd_Smed_v6_11807_0_1	Q96N87	3.14e-18	80	28.75
dd_Smed_v6_11809_0_1	O15031	2.98e-37	114	35.965
dd_Smed_v6_1180_0_1	Q16513	4e-179	317	70.032
dd_Smed_v6_11811_0_1	Q8TB52	7e-22	45	42.222
dd_Smed_v6_11813_0_1	Q99732	3.45e-10	30	40
dd_Smed_v6_11817_0_1	Q9BXT8	0.000426	46	32.609
dd_Smed_v6_11818_0_1	Q8N697	7.15e-12	68	42.647
dd_Smed_v6_1181_0_1	Q8IX12	4.76e-97	78	62.821
dd_Smed_v6_11821_0_1	Q9UNI6	1.96e-20	73	31.507
dd_Smed_v6_11823_0_1	Q9H461	4.22e-175	130	59.231
dd_Smed_v6_11824_0_1	Q9P2E3	5.03e-97	75	56
dd_Smed_v6_11826_0_1	Q8NF50	0	303	46.865
dd_Smed_v6_11828_0_1	A6NE52	8.68e-26	98	30.612
dd_Smed_v6_11830_0_1	P26927	8.92e-19	40	47.5
dd_Smed_v6_11831_0_1	Q86TJ2	1.12e-21	89	32.584
dd_Smed_v6_11832_0_1	Q9ULB1	1.18e-65	85	32.941
dd_Smed_v6_11833_0_1	Q8IV50	0.000879	39	38.462
dd_Smed_v6_11835_0_1	Q8N434	2.67e-39	121	28.926
dd_Smed_v6_11837_0_1	Q08174	3.22e-30	86	37.209
dd_Smed_v6_11839_0_1	A0A1W2PN81	4.81e-60	102	50.98
dd_Smed_v6_1183_0_1	O60739	5.74e-39	88	65.909
dd_Smed_v6_11840_0_1	O75626	3.06e-60	138	61.594
dd_Smed_v6_11841_0_1	Q5TCX8	3.5e-19	53	52.83
dd_Smed_v6_11843_0_1	P50440	1.66e-111	92	56.522
dd_Smed_v6_11847_0_1	Q9H2M9	2.82e-44	59	47.458
dd_Smed_v6_11849_0_1	Q13075	3.88e-07	40	37.5
dd_Smed_v6_1184_0_1	P62873	0	341	86.51
dd_Smed_v6_11851_0_1	Q9BYM8	4.26e-27	62	51.613
dd_Smed_v6_11853_0_1	Q9GZR1	7.75e-49	40	60
dd_Smed_v6_11855_0_1	Q86SQ0	3.38e-07	94	26.596
dd_Smed_v6_11856_0_1	Q53RE8	4.86e-25	52	44.231
dd_Smed_v6_11857_0_1	Q9NRD0	8.19e-92	188	53.191
dd_Smed_v6_11858_0_1	Q9UQL6	2.23e-09	38	63.158
dd_Smed_v6_11860_0_1	H3BRJ5	1.42e-08	36	47.222
dd_Smed_v6_11862_0_1	Q9UNW1	5.57e-31	59	47.458
dd_Smed_v6_11868_0_1	Q7L590	0.000511	89	25.843
dd_Smed_v6_1186_0_1	Q9Y6M9	1.33e-16	83	36.145
dd_Smed_v6_11870_0_1	P49368	0	334	63.473
dd_Smed_v6_11872_0_1	Q9UPT8	3.23e-14	36	47.222
dd_Smed_v6_11874_0_1	O14830	0	237	47.257
dd_Smed_v6_11876_0_1	P78504	0	98	52.041
dd_Smed_v6_11877_0_1	Q567V2	1.33e-18	91	39.56
dd_Smed_v6_1187_0_1	Q13490	4.19e-06	26	50
dd_Smed_v6_11882_0_1	Q8IUR7	1.47e-10	100	29
dd_Smed_v6_11883_0_1	P27105	1.37e-35	86	66.279
dd_Smed_v6_11884_0_1	Q9H0I3	1.4e-60	152	50.658
dd_Smed_v6_11885_0_1	Q3MIR4	1.43e-42	42	61.905
dd_Smed_v6_11886_0_1	Q03721	1.72e-54	58	51.724
dd_Smed_v6_11887_0_1	Q9H987	9.11e-10	61	40.984
dd_Smed_v6_11888_0_1	Q8TCJ0	1.68e-24	103	36.893
dd_Smed_v6_11891_0_1	Q99759	1.42e-20	79	43.038
dd_Smed_v6_11893_0_1	Q9H5V7	3.3e-13	48	50
dd_Smed_v6_11894_0_1	Q8NEE8	3.12e-95	262	35.878
dd_Smed_v6_11895_0_1	Q8N8A2	4.05e-11	93	37.634
dd_Smed_v6_11898_0_1	Q9HAF1	7.73e-20	84	46.429
dd_Smed_v6_11899_0_1	Q53H47	1.01e-12	42	47.619
dd_Smed_v6_1189_0_1	P55809	0	239	65.272
dd_Smed_v6_11900_0_1	Q567V2	1.4e-15	91	32.967
dd_Smed_v6_11901_0_1	Q9Y256	2.09e-31	60	45
dd_Smed_v6_11903_0_1	Q5GH73	1.84e-35	70	41.429
dd_Smed_v6_11904_0_1	P0CG48	2.64e-37	145	29.655
dd_Smed_v6_11905_0_1	Q8TEW0	1.9e-28	87	35.632
dd_Smed_v6_11906_0_1	P98073	2.79e-18	63	39.683
dd_Smed_v6_11908_0_1	P14625	0	146	67.808
dd_Smed_v6_11909_0_1	Q8N7U6	3.23e-54	187	31.551
dd_Smed_v6_1190_0_1	Q07021	1.67e-05	55	40
dd_Smed_v6_11910_0_1	Q9HC97	2.74e-05	45	35.556
dd_Smed_v6_11911_0_1	P41134	1.69e-11	39	58.974
dd_Smed_v6_11912_0_1	Q9HBG6	0	321	51.402
dd_Smed_v6_11914_0_1	P18405	2.05e-37	78	60.256
dd_Smed_v6_11915_0_1	Q96SW2	1.21e-08	43	39.535
dd_Smed_v6_11917_0_1	P54219	1.73e-06	80	28.75
dd_Smed_v6_11921_0_1	Q9BYK8	1.1e-39	57	40.351
dd_Smed_v6_11926_0_1	Q0P6H9	1.52e-14	90	34.444
dd_Smed_v6_11926_1_1	Q0P6H9	8.05e-93	121	49.587
dd_Smed_v6_11927_0_1	Q86Y97	3.68e-47	76	53.947
dd_Smed_v6_11928_0_1	Q9BXR0	3.86e-138	163	66.258
dd_Smed_v6_1192_0_1	Q07955	5.54e-48	83	50.602
dd_Smed_v6_11930_0_1	Q8N2R0	2.46e-05	23	47.826
dd_Smed_v6_11931_0_1	Q8NFR7	4.52e-25	48	52.083
dd_Smed_v6_11933_0_1	Q8N5Y8	9.13e-06	18	61.111
dd_Smed_v6_11934_0_1	Q9UIW2	4.26e-38	40	47.5
dd_Smed_v6_11935_0_1	P28347	5.66e-62	75	89.333
dd_Smed_v6_11936_0_1	O15013	0.00014	61	31.148
dd_Smed_v6_11939_0_1	P31321	1.44e-128	241	70.539
dd_Smed_v6_11942_0_1	P0DP25	3.94e-56	144	59.028
dd_Smed_v6_11943_0_1	Q86YW9	5.69e-36	56	42.857
dd_Smed_v6_11944_0_1	Q16394	7.16e-113	175	61.143
dd_Smed_v6_11946_0_1	P16157	1.09e-06	53	35.849
dd_Smed_v6_11947_0_1	P06280	5.41e-94	96	60.417
dd_Smed_v6_11948_0_1	Q13683	1.13e-10	88	28.409
dd_Smed_v6_1194_0_1	Q9UKV8	3.69e-79	166	65.06
dd_Smed_v6_11951_0_1	O00560	1.41e-09	58	39.655
dd_Smed_v6_11953_0_1	P62736	4.4e-27	69	56.522
dd_Smed_v6_11954_0_1	Q9P215	4.21e-05	44	40.909
dd_Smed_v6_11955_0_1	Q15822	2.24e-98	166	48.193
dd_Smed_v6_11957_0_1	Q5T1H1	0.000154	20	65
dd_Smed_v6_11958_0_1	Q99996	0.000185	38	39.474
dd_Smed_v6_1195_0_1	O43760	1.78e-27	79	50.633
dd_Smed_v6_11961_0_1	Q9BSH3	2.4e-06	73	28.767
dd_Smed_v6_11962_0_1	Q9Y5L3	7.99e-51	55	40
dd_Smed_v6_11963_0_1	Q9NZQ0	2.67e-83	129	69.767
dd_Smed_v6_11967_0_1	Q9NZZ3	2.02e-50	135	51.852
dd_Smed_v6_11968_0_1	P28329	3.95e-35	105	51.429
dd_Smed_v6_11969_0_1	O75154	2.49e-25	141	28.369
dd_Smed_v6_1196_0_1	Q9NVA4	1.06e-116	316	50.316
dd_Smed_v6_11970_0_1	Q8N2M4	1.05e-21	111	31.532
dd_Smed_v6_11975_0_1	O95343	1.89e-109	189	80.952
dd_Smed_v6_11976_0_1	Q96LT4	3.34e-76	98	68.367
dd_Smed_v6_1197_0_1	Q92896	2.93e-143	112	43.75
dd_Smed_v6_11981_0_1	O14795	0	487	61.396
dd_Smed_v6_11982_0_1	Q96S44	2.7e-31	90	32.222
dd_Smed_v6_11983_0_1	Q8WUD4	2.92e-05	54	27.778
dd_Smed_v6_11987_0_1	O60500	2.87e-13	78	38.462
dd_Smed_v6_11988_0_1	Q6R2W3	1.49e-14	63	53.968
dd_Smed_v6_1198_0_1	Q16181	7.78e-104	197	60.914
dd_Smed_v6_11990_0_1	Q9BRX9	1.97e-71	262	42.366
dd_Smed_v6_11993_0_1	Q8TBZ2	3.97e-17	115	27.826
dd_Smed_v6_11994_0_1	Q86UW6	0.000185	47	42.553
dd_Smed_v6_11995_0_1	Q9P0L2	8.23e-139	186	66.667
dd_Smed_v6_11998_0_1	Q9Y3B4	2.04e-29	88	53.409
dd_Smed_v6_1199_0_1	Q8WZ79	1.58e-24	43	44.186
dd_Smed_v6_12000_0_1	Q13395	2.85e-73	154	51.299
dd_Smed_v6_12002_0_1	A2VCL2	4.01e-19	132	31.818
dd_Smed_v6_12008_0_1	Q96NL0	1.64e-27	94	34.043
dd_Smed_v6_12010_0_1	O14753	1.19e-53	131	57.252
dd_Smed_v6_12011_0_1	A6NNP5	2.08e-06	49	38.776
dd_Smed_v6_12013_0_1	O43663	1.28e-13	62	33.871
dd_Smed_v6_12016_0_1	Q8WWF5	6.84e-06	54	31.481
dd_Smed_v6_12017_0_1	Q14315	5.56e-87	176	37.5
dd_Smed_v6_1201_0_1	Q14376	5.27e-140	298	60.067
dd_Smed_v6_12021_0_1	Q6ZYL4	2.14e-11	59	42.373
dd_Smed_v6_12022_0_1	A7E2U8	1.09e-23	58	44.828
dd_Smed_v6_12023_0_1	Q9Y5G8	2.63e-38	74	37.838
dd_Smed_v6_12024_0_1	Q8TF42	4.44e-49	114	34.211
dd_Smed_v6_12026_0_1	Q92611	5.87e-177	462	59.307
dd_Smed_v6_12027_0_1	Q9UPY5	4.22e-99	229	46.288
dd_Smed_v6_12029_0_1	Q9H0R6	7.07e-102	111	51.351
dd_Smed_v6_12031_0_1	O75762	1.26e-12	57	33.333
dd_Smed_v6_12033_0_1	P27701	1.56e-16	53	33.962
dd_Smed_v6_12037_0_1	Q9NY37	2.7e-09	61	36.066
dd_Smed_v6_1203_0_1	Q8TCT9	5.87e-126	199	64.824
dd_Smed_v6_12042_0_1	Q9HAV4	2.74e-15	126	23.016
dd_Smed_v6_12043_0_1	Q8N4P6	1.34e-21	78	37.179
dd_Smed_v6_12046_0_1	O94988	6.02e-44	79	49.367
dd_Smed_v6_12048_0_1	P0DP25	3.67e-28	64	42.188
dd_Smed_v6_1204_0_1	Q13541	9.2e-08	32	53.125
dd_Smed_v6_12050_0_1	Q9H6R3	2.14e-125	240	38.75
dd_Smed_v6_12052_0_1	Q8TBZ6	7.12e-11	46	41.304
dd_Smed_v6_12053_0_1	Q8TEQ8	7.55e-69	114	44.737
dd_Smed_v6_12055_0_1	Q8IYE1	7.42e-33	86	40.698
dd_Smed_v6_12056_0_1	Q7Z4L5	0	291	41.237
dd_Smed_v6_12057_0_1	Q6ZMY6	4.19e-65	85	55.294
dd_Smed_v6_12058_0_1	O15075	7.51e-24	42	45.238
dd_Smed_v6_12059_0_1	Q9UER7	6.24e-07	81	30.864
dd_Smed_v6_1205_0_1	Q9UPN3	0	203	52.217
dd_Smed_v6_12062_0_1	P14415	1.16e-07	24	45.833
dd_Smed_v6_12063_0_1	Q9NYI0	7.57e-39	103	43.689
dd_Smed_v6_12066_0_1	Q96EM0	5.8e-35	34	47.059
dd_Smed_v6_12067_0_1	Q96FV0	2.09e-19	74	47.297
dd_Smed_v6_12068_0_1	Q2M1V0	0.000115	54	33.333
dd_Smed_v6_12069_0_1	Q53H80	1.53e-11	67	41.791
dd_Smed_v6_1206_0_1	O60760	1.01e-19	52	42.308
dd_Smed_v6_12075_0_1	Q8IZJ6	4.35e-62	166	56.627
dd_Smed_v6_12076_0_1	Q6PI48	3.62e-118	202	53.96
dd_Smed_v6_12081_0_1	Q96IC2	4.48e-31	101	50.495
dd_Smed_v6_12085_0_1	Q08211	5.38e-47	49	65.306
dd_Smed_v6_12089_0_1	Q9H501	8.22e-18	72	37.5
dd_Smed_v6_1208_0_1	P53618	0	263	73.764
dd_Smed_v6_12091_0_1	Q6NT04	5.72e-86	217	46.083
dd_Smed_v6_12096_0_1	Q96SD1	5.12e-25	37	64.865
dd_Smed_v6_1209_0_1	Q9H8Y8	6.99e-83	207	63.768
dd_Smed_v6_12102_0_1	Q8N4V2	1.02e-52	125	30.4
dd_Smed_v6_12103_0_1	P48730	2.08e-100	210	55.238
dd_Smed_v6_12104_0_1	Q8N9N2	5.92e-28	119	33.613
dd_Smed_v6_12105_0_1	Q96RT1	4.66e-09	55	34.545
dd_Smed_v6_12106_0_1	Q9Y2U5	4.92e-07	23	65.217
dd_Smed_v6_12107_0_1	Q96ER9	6.81e-31	149	36.242
dd_Smed_v6_12108_0_1	Q8WW35	1.95e-14	91	31.868
dd_Smed_v6_1210_0_1	O75112	0.000403	27	59.259
dd_Smed_v6_12111_0_1	O75094	0	199	39.196
dd_Smed_v6_12112_0_1	P63096	2.78e-164	355	65.915
dd_Smed_v6_12115_0_1	Q9UN76	3.81e-49	143	23.776
dd_Smed_v6_12118_0_1	Q96J84	7.35e-16	100	30
dd_Smed_v6_12119_1_1	Q92630	5.52e-150	273	70.33
dd_Smed_v6_1211_0_1	Q96T60	1.94e-87	107	50.467
dd_Smed_v6_12122_0_1	Q96NW4	1.01e-103	103	35.922
dd_Smed_v6_12125_0_1	Q9UQB9	1.72e-62	174	44.253
dd_Smed_v6_12126_1_1	O95149	2.01e-25	62	37.097
dd_Smed_v6_12128_0_1	Q96FL8	5.33e-69	223	33.184
dd_Smed_v6_1212_0_1	Q13177	9.01e-21	45	44.444
dd_Smed_v6_12130_0_1	Q2NKQ1	0	129	61.24
dd_Smed_v6_12132_0_1	O75414	4.36e-34	137	45.985
dd_Smed_v6_12133_0_1	Q9HCM2	9.65e-10	56	42.857
dd_Smed_v6_12135_0_1	Q9GZL7	0.000738	43	37.209
dd_Smed_v6_12138_0_1	Q8IWF2	1.44e-163	247	45.344
dd_Smed_v6_12141_0_1	Q99496	1.08e-38	101	53.465
dd_Smed_v6_12142_0_1	Q9H7Z3	5.9e-38	143	36.364
dd_Smed_v6_12144_0_1	P50443	2.6e-14	69	28.986
dd_Smed_v6_12145_0_1	Q9C0B2	1.5e-05	63	39.683
dd_Smed_v6_12146_0_1	P32297	1.07e-84	153	47.059
dd_Smed_v6_12148_0_1	Q86UP8	3.24e-40	143	40.559
dd_Smed_v6_1214_0_1	Q9H0N5	4.4e-31	87	57.471
dd_Smed_v6_12150_0_1	Q9H0A6	5.49e-51	163	39.877
dd_Smed_v6_12152_0_1	P08908	8.95e-49	124	39.516
dd_Smed_v6_12156_0_1	Q99417	3.32e-16	83	34.94
dd_Smed_v6_12157_0_1	Q08345	4.57e-11	87	31.034
dd_Smed_v6_1215_0_1	P09327	5.94e-46	102	46.078
dd_Smed_v6_12161_0_1	Q6P2C0	1.65e-08	57	33.333
dd_Smed_v6_12164_0_1	Q9Y2G3	4.88e-14	50	60
dd_Smed_v6_12166_0_1	O94768	5.53e-48	156	40.385
dd_Smed_v6_12168_0_1	A8K855	2.21e-33	150	30.667
dd_Smed_v6_12169_0_1	Q92952	2.51e-52	104	36.538
dd_Smed_v6_12170_0_1	Q9P0K8	1.96e-25	44	61.364
dd_Smed_v6_12172_0_1	P27105	2.38e-58	171	71.93
dd_Smed_v6_12173_0_1	P17027	2.66e-14	50	34
dd_Smed_v6_12174_0_1	Q08345	5.68e-24	63	47.619
dd_Smed_v6_12176_0_1	P49137	1.14e-127	201	59.204
dd_Smed_v6_1217_0_1	Q96A72	4.58e-77	141	79.433
dd_Smed_v6_12182_0_1	P36544	5.5e-110	150	53.333
dd_Smed_v6_12183_0_1	Q6XQN6	1.29e-141	207	50.242
dd_Smed_v6_12186_0_1	Q9C098	1.31e-84	148	44.595
dd_Smed_v6_12188_0_1	Q5RL73	9.03e-24	69	42.029
dd_Smed_v6_1218_0_1	Q14847	2.27e-60	96	57.292
dd_Smed_v6_12190_0_1	Q12933	0.000836	33	39.394
dd_Smed_v6_12192_0_1	O95803	0	272	51.471
dd_Smed_v6_12194_0_1	Q9Y6R0	1.51e-67	145	63.448
dd_Smed_v6_12196_0_1	Q49AG3	1.55e-15	83	28.916
dd_Smed_v6_1219_1_1	Q9BYD5	2.97e-14	39	38.462
dd_Smed_v6_121_0_1	P62979	4.03e-57	65	98.462
dd_Smed_v6_12201_0_1	P23352	3.88e-08	60	38.333
dd_Smed_v6_12202_0_1	Q86TU7	4.12e-38	190	32.632
dd_Smed_v6_12205_0_1	Q9Y3M2	0.00057	38	47.368
dd_Smed_v6_12207_0_1	Q86SR1	1.08e-66	100	54
dd_Smed_v6_12208_0_1	Q02224	2.6e-11	143	20.979
dd_Smed_v6_12209_0_1	Q03154	6.35e-109	160	41.875
dd_Smed_v6_1220_0_1	O15372	1.02e-41	90	38.889
dd_Smed_v6_12210_0_1	P48443	1.56e-65	92	60.87
dd_Smed_v6_12211_0_1	Q9C040	6.4e-07	47	42.553
dd_Smed_v6_12213_0_1	Q96DB5	7.13e-42	110	37.273
dd_Smed_v6_12214_0_1	Q9NZW4	2.22e-09	237	19.409
dd_Smed_v6_12219_0_1	Q9BYK8	2.76e-44	90	40
dd_Smed_v6_1221_0_1	Q9UJU6	7.15e-36	115	37.391
dd_Smed_v6_12221_0_1	Q5T2R2	1.79e-71	124	53.226
dd_Smed_v6_12222_0_1	Q12770	6.22e-70	114	65.789
dd_Smed_v6_12226_0_1	P20020	3.07e-72	142	63.38
dd_Smed_v6_12228_0_1	Q9UPV0	7.74e-38	97	62.887
dd_Smed_v6_12229_0_1	P43354	6.42e-50	89	84.27
dd_Smed_v6_1222_0_1	P62191	0	393	89.313
dd_Smed_v6_12232_0_1	Q8TBZ3	2.83e-104	154	55.195
dd_Smed_v6_12233_0_1	Q9P215	2.15e-06	33	33.333
dd_Smed_v6_12234_0_1	Q12986	1.49e-161	172	47.674
dd_Smed_v6_12236_0_1	A0A087WZ62	4.74e-22	83	43.373
dd_Smed_v6_1223_0_1	Q99497	3.74e-24	86	37.209
dd_Smed_v6_12240_0_1	Q8N608	1.71e-25	54	35.185
dd_Smed_v6_12242_0_1	Q8IZP7	5.52e-78	94	62.766
dd_Smed_v6_12243_0_1	Q9UQD0	0	123	54.472
dd_Smed_v6_12246_0_1	O95486	5.51e-113	129	53.488
dd_Smed_v6_12247_0_1	Q15131	1.67e-85	230	53.913
dd_Smed_v6_12249_0_1	Q9BQA5	5.14e-59	78	34.615
dd_Smed_v6_1224_0_1	P55087	1.09e-28	72	41.667
dd_Smed_v6_12254_0_1	P08670	4.66e-28	233	22.747
dd_Smed_v6_1225_0_1	P48729	2.84e-156	153	79.085
dd_Smed_v6_12261_0_1	Q9NZ71	1.52e-161	144	52.778
dd_Smed_v6_12262_0_1	Q13253	3.35e-18	78	38.462
dd_Smed_v6_12264_0_1	O43474	8.54e-43	82	71.951
dd_Smed_v6_12265_0_1	Q9GZY0	1.23e-15	48	41.667
dd_Smed_v6_12267_0_1	Q6NYC1	3.4e-16	84	29.762
dd_Smed_v6_12268_0_1	O14639	1.23e-42	113	41.593
dd_Smed_v6_1226_0_1	P22557	6.14e-156	358	58.101
dd_Smed_v6_12270_0_1	O75427	1.02e-44	124	44.355
dd_Smed_v6_12273_0_1	Q6ZRS2	0	193	77.72
dd_Smed_v6_12274_0_1	Q92830	5.67e-34	46	50
dd_Smed_v6_12275_0_1	Q9Y4J8	1.32e-105	92	56.522
dd_Smed_v6_12277_0_1	Q6QNK2	8.35e-07	70	31.429
dd_Smed_v6_12278_0_1	Q8IUD2	8.06e-88	224	31.25
dd_Smed_v6_12279_0_1	Q8N8A6	5.88e-54	121	38.843
dd_Smed_v6_12284_0_1	Q9NSA0	5.59e-16	97	31.959
dd_Smed_v6_12286_0_1	Q8TED1	1.23e-20	72	41.667
dd_Smed_v6_1228_0_1	Q9UBS0	1.78e-93	154	47.403
dd_Smed_v6_12290_0_1	Q8NBS3	1.98e-145	102	56.863
dd_Smed_v6_12292_0_1	Q9H9B4	1e-126	301	60.465
dd_Smed_v6_12297_0_1	Q8WZ42	1.39e-05	75	30.667
dd_Smed_v6_1229_0_1	P00568	4.56e-67	180	58.889
dd_Smed_v6_122_0_1	O75900	0.001	28	46.429
dd_Smed_v6_122_1_1	P38571	9.31e-94	143	52.448
dd_Smed_v6_12302_0_1	Q9P1Z9	1.92e-50	148	33.108
dd_Smed_v6_12305_0_1	P16066	1.92e-170	275	63.636
dd_Smed_v6_12307_0_1	Q13136	0	170	67.647
dd_Smed_v6_1230_0_1	P22676	6.25e-56	41	65.854
dd_Smed_v6_12311_0_1	Q7RTX9	1.21e-07	85	30.588
dd_Smed_v6_12312_0_1	P08651	7.25e-11	55	47.273
dd_Smed_v6_12317_0_1	P50222	7.86e-25	62	75.806
dd_Smed_v6_12318_0_1	Q7Z6E9	5.24e-21	33	54.545
dd_Smed_v6_12319_0_1	P54252	1.07e-68	92	66.304
dd_Smed_v6_1231_0_1	P55036	2.82e-66	152	52.632
dd_Smed_v6_12323_0_1	Q86YQ8	1.09e-93	175	47.429
dd_Smed_v6_12325_0_1	Q6YHU6	1.29e-33	94	36.17
dd_Smed_v6_12327_0_1	Q9H0A0	4.3e-25	63	46.032
dd_Smed_v6_12329_0_1	Q14562	1.59e-159	186	52.688
dd_Smed_v6_12330_0_1	Q5JTZ9	1.38e-69	72	47.222
dd_Smed_v6_12333_0_1	Q7L3T8	4.71e-90	205	47.317
dd_Smed_v6_12337_0_1	Q13324	2.36e-43	49	42.857
dd_Smed_v6_12339_0_1	Q9H0I2	2.24e-31	122	40.164
dd_Smed_v6_1233_0_1	Q6P0Q8	1.89e-27	95	47.368
dd_Smed_v6_12340_0_1	Q8N8Q9	6.66e-86	293	44.71
dd_Smed_v6_12342_0_1	Q5JU85	1.38e-05	43	41.86
dd_Smed_v6_12345_0_1	Q9NQT5	1.88e-16	65	46.154
dd_Smed_v6_12354_0_1	Q8N309	2.64e-24	72	51.389
dd_Smed_v6_12355_0_1	P12821	7.71e-94	174	37.356
dd_Smed_v6_12357_0_1	Q32P41	2.55e-50	114	50
dd_Smed_v6_12358_0_1	Q12767	1.16e-99	83	50.602
dd_Smed_v6_1235_0_1	O14818	7.12e-96	209	67.464
dd_Smed_v6_12363_0_1	Q5VT97	6.38e-39	109	41.284
dd_Smed_v6_12365_0_1	Q6FI13	8.46e-39	46	97.826
dd_Smed_v6_1236_0_1	Q9BV86	1.21e-51	108	42.593
dd_Smed_v6_12371_0_1	O15379	0	229	76.856
dd_Smed_v6_12372_0_1	Q92743	4.97e-43	49	65.306
dd_Smed_v6_12376_0_1	Q7Z402	1.67e-14	63	31.746
dd_Smed_v6_12378_0_1	A6NFT4	1.01e-51	119	47.059
dd_Smed_v6_12379_0_1	Q9Y3C7	1.79e-36	106	54.717
dd_Smed_v6_1237_0_1	O60262	2.62e-06	47	40.426
dd_Smed_v6_12380_0_1	Q8TF76	3.66e-50	141	47.518
dd_Smed_v6_12381_0_1	O95395	4.39e-45	73	38.356
dd_Smed_v6_12387_0_1	Q9NR09	4.07e-58	99	55.556
dd_Smed_v6_12389_0_1	Q5VT06	1.05e-07	61	40.984
dd_Smed_v6_1238_0_1	P30049	5.47e-41	132	58.333
dd_Smed_v6_12390_0_1	Q06609	1.95e-30	85	58.824
dd_Smed_v6_12391_0_1	Q9Y4K4	2.55e-10	48	33.333
dd_Smed_v6_12392_0_1	Q9UF47	7.77e-26	112	46.429
dd_Smed_v6_12393_0_1	Q7Z6K3	1.5e-05	52	38.462
dd_Smed_v6_12396_0_1	Q8WXU2	6.92e-66	94	55.319
dd_Smed_v6_12399_0_1	Q9NYB0	3.64e-07	55	38.182
dd_Smed_v6_1239_0_1	P61224	1.16e-86	139	89.209
dd_Smed_v6_123_0_1	P60866	1.52e-42	109	64.22
dd_Smed_v6_12402_0_1	P49638	5.72e-13	61	34.426
dd_Smed_v6_12403_0_1	Q93063	8.1e-18	100	35
dd_Smed_v6_12407_0_1	Q9NSA2	1.42e-144	219	73.516
dd_Smed_v6_12408_0_1	P07686	2.15e-76	134	50
dd_Smed_v6_12410_0_1	P18146	2.95e-25	64	62.5
dd_Smed_v6_12412_0_1	Q8IYR2	1.4e-23	62	37.097
dd_Smed_v6_12413_0_1	Q8N6G6	1.92e-20	60	33.333
dd_Smed_v6_12415_0_1	Q5VT06	0.000205	58	39.655
dd_Smed_v6_12416_0_1	Q9NZL4	3.5e-06	83	24.096
dd_Smed_v6_12419_0_1	Q9NU22	0	217	61.751
dd_Smed_v6_1241_0_1	P49720	1.33e-86	206	61.65
dd_Smed_v6_12425_0_1	O43903	1.09e-14	72	37.5
dd_Smed_v6_12427_0_1	Q96RR1	2.61e-25	63	44.444
dd_Smed_v6_12428_0_1	Q6ZU64	0	320	42.5
dd_Smed_v6_12429_0_1	Q96JQ0	1.34e-46	102	34.314
dd_Smed_v6_1242_0_1	P45877	6.69e-43	102	65.686
dd_Smed_v6_12432_0_1	Q16832	1.48e-43	49	51.02
dd_Smed_v6_12435_0_1	Q86VE3	1.15e-15	62	43.548
dd_Smed_v6_12436_0_1	O60513	6.03e-72	140	48.571
dd_Smed_v6_12439_0_1	Q8IZY2	1.48e-69	73	53.425
dd_Smed_v6_12440_0_1	Q96CX2	4e-39	66	50
dd_Smed_v6_12445_0_1	Q6ZS10	2.99e-07	40	40
dd_Smed_v6_12446_0_1	Q9UI43	2.7e-35	62	58.065
dd_Smed_v6_12447_0_1	Q99708	1.26e-09	25	52
dd_Smed_v6_12448_0_1	Q8NEF3	3.65e-27	72	38.889
dd_Smed_v6_1244_0_1	O75112	6.34e-22	109	33.028
dd_Smed_v6_12456_0_1	Q8N9R8	5.05e-09	33	39.394
dd_Smed_v6_12458_0_1	Q9BQB6	1.64e-32	137	40.146
dd_Smed_v6_1245_0_1	Q96KQ4	4.14e-10	55	43.636
dd_Smed_v6_12461_0_1	Q9BYT3	1.45e-50	153	37.255
dd_Smed_v6_12464_0_1	Q86UV5	2.17e-61	90	30
dd_Smed_v6_12465_0_1	Q9NRH2	1.35e-145	260	74.615
dd_Smed_v6_12466_0_1	P32239	3.52e-10	42	38.095
dd_Smed_v6_12467_0_1	P31275	4.69e-17	61	52.459
dd_Smed_v6_12470_0_1	Q6IQ55	6.92e-99	122	63.934
dd_Smed_v6_12472_0_1	Q9Y219	8.14e-19	58	39.655
dd_Smed_v6_12476_0_1	Q9NU02	4.64e-158	266	45.113
dd_Smed_v6_12478_0_1	O60671	3.8e-65	178	44.944
dd_Smed_v6_1247_0_1	P05165	0	493	67.14
dd_Smed_v6_12480_0_1	Q9NVE4	5.32e-33	88	39.773
dd_Smed_v6_12484_0_1	A8K8P3	2.41e-40	103	35.922
dd_Smed_v6_12485_0_1	P49366	2.37e-126	204	65.196
dd_Smed_v6_12488_0_1	O15244	6.87e-18	138	25.362
dd_Smed_v6_12490_0_1	P08519	0.000237	33	30.303
dd_Smed_v6_12491_0_1	Q9UDW3	1.25e-12	44	56.818
dd_Smed_v6_12492_0_1	Q16533	1.88e-09	41	39.024
dd_Smed_v6_1249_0_1	P55786	0	284	63.028
dd_Smed_v6_124_0_1	Q71U36	0	432	87.963
dd_Smed_v6_12500_0_1	P41145	3.1e-05	96	23.958
dd_Smed_v6_12501_0_1	Q5T0B9	1.21e-43	66	53.03
dd_Smed_v6_12503_0_1	Q12791	4.1e-31	119	38.655
dd_Smed_v6_12505_0_1	Q8NEL9	7.27e-95	101	60.396
dd_Smed_v6_12507_0_1	P0CG08	7.28e-134	202	69.307
dd_Smed_v6_1250_0_1	Q9Y4W6	0	290	66.207
dd_Smed_v6_12514_0_1	Q9NVR7	6.57e-98	99	42.424
dd_Smed_v6_12515_0_1	Q9P2S6	1.48e-123	113	44.248
dd_Smed_v6_12517_0_1	Q7Z4M0	5.63e-07	28	46.429
dd_Smed_v6_12518_0_1	Q00403	1.78e-20	131	28.244
dd_Smed_v6_12519_0_1	Q08945	9.63e-29	153	33.987
dd_Smed_v6_1251_0_1	Q13643	1.67e-16	49	36.735
dd_Smed_v6_12520_0_1	O75161	2.27e-118	149	36.242
dd_Smed_v6_12521_0_1	P62701	1.39e-59	213	44.131
dd_Smed_v6_12522_0_1	Q13148	3.56e-28	80	37.5
dd_Smed_v6_12523_0_1	Q63HM1	5.41e-30	109	27.523
dd_Smed_v6_12524_0_1	Q5JU00	8.59e-114	146	49.315
dd_Smed_v6_12525_0_1	Q96GW9	1.92e-54	58	58.621
dd_Smed_v6_12533_0_1	Q5VU57	0	385	70.909
dd_Smed_v6_12535_0_1	P17787	6.21e-91	161	47.205
dd_Smed_v6_12537_0_1	Q9ULW0	1.98e-05	61	36.066
dd_Smed_v6_12539_0_1	Q86SR1	9.86e-61	69	71.014
dd_Smed_v6_1253_0_1	P61956	3.77e-28	78	61.538
dd_Smed_v6_12541_0_1	Q9H069	1.41e-122	135	59.259
dd_Smed_v6_12545_0_1	Q13332	0	267	62.172
dd_Smed_v6_12547_0_1	Q8IZD6	0.000108	47	38.298
dd_Smed_v6_12548_0_1	Q9P1Y6	5.86e-22	59	44.068
dd_Smed_v6_1254_0_1	P08574	4.07e-98	238	59.664
dd_Smed_v6_12551_0_1	P51587	1.45e-46	115	45.217
dd_Smed_v6_12553_0_1	Q9H6Y2	8.03e-16	82	37.805
dd_Smed_v6_12558_0_1	Q96Q05	8.48e-16	60	41.667
dd_Smed_v6_12559_0_1	P39023	5.95e-110	138	75.362
dd_Smed_v6_1255_0_1	P21283	6.41e-120	320	52.5
dd_Smed_v6_12565_0_1	Q96Q15	2.18e-14	81	37.037
dd_Smed_v6_12567_0_1	Q8IZ41	1.37e-36	101	55.446
dd_Smed_v6_12568_0_1	Q14697	1.36e-146	206	44.66
dd_Smed_v6_12569_0_1	P61086	9.37e-41	79	48.101
dd_Smed_v6_1256_0_1	Q9P0J0	3.55e-12	51	39.216
dd_Smed_v6_12570_0_1	Q9NRK6	4.69e-145	268	42.537
dd_Smed_v6_12571_0_1	Q08345	3.81e-35	50	54
dd_Smed_v6_12573_0_1	O43896	1.02e-103	65	78.462
dd_Smed_v6_12575_0_1	Q8TBK2	3.68e-29	57	50.877
dd_Smed_v6_12577_0_1	Q96SL1	1.17e-11	60	33.333
dd_Smed_v6_12579_0_1	O75912	0	124	61.29
dd_Smed_v6_1257_0_1	O43657	2.94e-17	68	27.941
dd_Smed_v6_12580_0_1	Q9BVW5	7.38e-18	104	41.346
dd_Smed_v6_12583_0_1	P32121	3.03e-121	162	51.235
dd_Smed_v6_12584_0_1	Q15654	3.27e-41	134	46.269
dd_Smed_v6_12586_0_1	P13994	9.77e-72	213	52.113
dd_Smed_v6_12588_0_1	Q8IY82	8.4e-163	190	48.421
dd_Smed_v6_1258_0_1	Q96J94	6.85e-153	215	43.256
dd_Smed_v6_12591_0_1	Q9NR20	1.86e-127	205	53.659
dd_Smed_v6_12592_0_1	A2A2Y4	2.18e-13	82	31.707
dd_Smed_v6_12594_0_1	P34925	1.06e-58	126	46.825
dd_Smed_v6_12595_0_1	Q9C026	2.35e-93	106	47.17
dd_Smed_v6_12598_0_1	Q6PJG9	1.07e-08	59	27.119
dd_Smed_v6_12599_0_1	Q14919	5.87e-09	79	35.443
dd_Smed_v6_1259_0_1	P04179	6.4e-99	193	68.394
dd_Smed_v6_125_0_1	Q09666	0.000208	33	42.424
dd_Smed_v6_12601_0_1	P08253	1.21e-14	33	51.515
dd_Smed_v6_12602_0_1	Q03431	1.65e-50	51	47.059
dd_Smed_v6_12605_0_1	Q2M385	8.07e-48	87	50.575
dd_Smed_v6_12606_0_1	P35523	4.7e-45	51	56.863
dd_Smed_v6_12607_0_1	A6NNW6	3.61e-05	41	41.463
dd_Smed_v6_12608_0_1	Q13185	1.26e-14	65	44.615
dd_Smed_v6_1260_0_1	P04818	1.21e-112	246	67.48
dd_Smed_v6_12611_0_1	Q8TCF1	6.25e-15	44	38.636
dd_Smed_v6_12613_0_1	P49796	3.52e-12	81	27.16
dd_Smed_v6_12618_0_1	A0AVF1	0	539	71.429
dd_Smed_v6_1261_0_1	Q8N4E7	6.71e-28	133	39.098
dd_Smed_v6_12621_0_1	Q9NS40	0	434	72.35
dd_Smed_v6_12622_0_1	P26572	1.07e-81	144	60.417
dd_Smed_v6_12626_0_1	Q96A29	2.83e-101	244	54.508
dd_Smed_v6_12628_0_1	Q9BUY7	4.24e-20	78	34.615
dd_Smed_v6_1262_0_1	O00410	0	247	53.441
dd_Smed_v6_12634_0_1	P15172	1.44e-17	81	75.309
dd_Smed_v6_12637_0_1	O00444	1.52e-124	94	64.894
dd_Smed_v6_12638_0_1	P51530	1.63e-80	155	40.645
dd_Smed_v6_12639_0_1	Q12756	1.86e-76	85	47.059
dd_Smed_v6_1263_0_1	P42025	0	374	78.342
dd_Smed_v6_12640_0_1	P21452	1.08e-27	76	30.263
dd_Smed_v6_12641_0_1	Q9H336	1.23e-08	52	38.462
dd_Smed_v6_12645_0_1	Q8N6M0	1.37e-38	76	53.947
dd_Smed_v6_12647_0_1	Q9BQS2	3.15e-11	85	27.059
dd_Smed_v6_12648_0_1	Q9BUZ4	1.89e-05	35	45.714
dd_Smed_v6_1264_0_1	Q99436	5.35e-90	157	55.414
dd_Smed_v6_12650_0_1	O75343	2.81e-70	104	37.5
dd_Smed_v6_12651_0_1	O95147	6.49e-26	118	43.22
dd_Smed_v6_12653_0_1	Q99259	0	262	56.489
dd_Smed_v6_12656_0_1	Q9H2G9	2.33e-09	46	32.609
dd_Smed_v6_12657_0_1	Q9Y2B2	3.89e-26	62	48.387
dd_Smed_v6_12659_0_1	Q96DW6	1.09e-40	84	44.048
dd_Smed_v6_1265_0_1	Q9UNL2	6.42e-52	99	58.586
dd_Smed_v6_12660_2_1	Q96MW7	1.46e-113	133	48.872
dd_Smed_v6_12665_0_1	O75094	4.19e-15	86	40.698
dd_Smed_v6_12667_0_1	Q96P09	1.75e-06	48	29.167
dd_Smed_v6_12668_0_1	Q9NPI0	3.7e-20	116	35.345
dd_Smed_v6_12674_0_1	Q8N441	3.27e-18	38	39.474
dd_Smed_v6_12677_0_1	Q96SQ7	8.22e-14	75	46.667
dd_Smed_v6_12678_0_1	Q9BYM8	2.97e-09	34	35.294
dd_Smed_v6_12679_0_1	Q9ULI4	7.39e-36	114	39.474
dd_Smed_v6_12680_0_1	P05129	2.14e-11	41	48.78
dd_Smed_v6_12681_0_1	Q9NR82	5.32e-131	252	59.127
dd_Smed_v6_12684_0_1	Q8NEN0	9.41e-65	114	42.982
dd_Smed_v6_12688_0_1	Q9Y6L7	6.15e-14	76	39.474
dd_Smed_v6_12689_0_1	Q9C098	1.16e-104	125	64
dd_Smed_v6_1268_0_1	Q8TEU8	2.18e-19	51	60.784
dd_Smed_v6_12690_0_1	Q2TB18	8.62e-46	70	47.143
dd_Smed_v6_12691_0_1	Q8TEU8	1.56e-14	62	41.935
dd_Smed_v6_12692_0_1	Q53F39	3.91e-92	120	57.5
dd_Smed_v6_12693_0_1	Q9ULT8	1.12e-45	131	47.328
dd_Smed_v6_12694_0_1	Q8N8R5	1.07e-09	39	38.462
dd_Smed_v6_12695_0_1	Q8N434	1.07e-35	121	31.405
dd_Smed_v6_12697_0_1	Q6V0I7	3.65e-29	78	30.769
dd_Smed_v6_12699_0_1	P28702	3.76e-72	77	68.831
dd_Smed_v6_1269_0_1	Q6UWR7	6.98e-25	58	32.759
dd_Smed_v6_126_0_1	P35544	2.2e-28	70	71.429
dd_Smed_v6_12700_0_1	P23975	0	335	50.149
dd_Smed_v6_12702_0_1	Q96LB3	4.1e-147	327	42.813
dd_Smed_v6_12703_0_1	A1A4V9	3.01e-35	151	35.762
dd_Smed_v6_12706_0_1	O15146	7.46e-12	32	43.75
dd_Smed_v6_12707_0_1	Q6V0I7	8.49e-99	74	39.189
dd_Smed_v6_1270_0_1	Q8WUM9	4.18e-157	156	69.231
dd_Smed_v6_12711_0_1	Q9P2P1	1.97e-21	87	35.632
dd_Smed_v6_12712_0_1	Q96JS3	2.22e-05	54	33.333
dd_Smed_v6_12714_0_1	Q8IX29	8.52e-57	149	52.349
dd_Smed_v6_12715_0_1	O94887	6.88e-87	91	60.44
dd_Smed_v6_12716_0_1	Q5T7P8	3.39e-19	45	46.667
dd_Smed_v6_12717_0_1	A6PVC2	1.35e-82	72	58.333
dd_Smed_v6_12718_0_1	Q9Y4K3	2.51e-09	61	26.23
dd_Smed_v6_1271_0_1	Q96CW1	0	148	76.351
dd_Smed_v6_12720_0_1	Q8N434	1.29e-48	115	31.304
dd_Smed_v6_12722_0_1	Q8NFJ8	1.14e-33	71	84.507
dd_Smed_v6_12727_0_1	O43462	7.43e-78	172	39.535
dd_Smed_v6_12731_0_1	Q9HC52	8.56e-07	30	56.667
dd_Smed_v6_12732_0_1	P46531	1.72e-50	48	45.833
dd_Smed_v6_12735_0_1	A0A1B0GV03	8.8e-05	127	18.898
dd_Smed_v6_12736_0_1	Q8N2K1	3.83e-27	89	41.573
dd_Smed_v6_12738_0_1	Q8N461	2.97e-99	283	49.117
dd_Smed_v6_12742_0_1	Q8WVF1	3.74e-64	223	42.152
dd_Smed_v6_12745_0_1	Q8IZ73	3.26e-59	109	46.789
dd_Smed_v6_1274_0_1	P49223	4.41e-14	51	52.941
dd_Smed_v6_1274_1_1	O60841	0	440	51.818
dd_Smed_v6_12752_0_1	Q4G0U5	1.78e-40	118	28.814
dd_Smed_v6_12753_0_1	P35227	1.26e-41	94	54.255
dd_Smed_v6_12756_0_1	P98073	1.62e-06	32	53.125
dd_Smed_v6_12759_0_1	Q9H1P3	3.26e-88	92	51.087
dd_Smed_v6_1275_0_1	Q5TDP6	6.21e-14	43	44.186
dd_Smed_v6_12762_0_1	B2RC85	1.83e-129	165	56.364
dd_Smed_v6_12765_0_1	Q8N7M0	1.17e-09	62	33.871
dd_Smed_v6_12766_0_1	O00418	4.78e-10	51	37.255
dd_Smed_v6_12768_0_1	O14512	2.22e-44	81	44.444
dd_Smed_v6_12769_0_1	P55072	1.41e-51	76	46.053
dd_Smed_v6_1276_0_1	Q9UMS4	1.15e-176	204	52.941
dd_Smed_v6_12771_0_1	P23468	2.04e-71	82	43.902
dd_Smed_v6_12772_0_1	P21579	1.43e-11	43	39.535
dd_Smed_v6_12774_0_1	Q9UNW9	3.8e-55	105	55.238
dd_Smed_v6_12777_0_1	P62633	2.36e-07	17	52.941
dd_Smed_v6_12782_0_1	Q9H0A0	1.47e-45	54	42.593
dd_Smed_v6_12783_0_1	Q9Y2C3	1.97e-30	113	41.593
dd_Smed_v6_12784_0_1	P10599	8.57e-27	50	54
dd_Smed_v6_12787_0_1	P30085	1.24e-13	36	52.778
dd_Smed_v6_12789_0_1	O14757	1.8e-33	144	35.417
dd_Smed_v6_1278_0_1	P25786	1.72e-105	237	64.135
dd_Smed_v6_12790_0_1	P30550	6.18e-23	110	40
dd_Smed_v6_12791_0_1	Q14590	3.44e-20	55	40
dd_Smed_v6_12794_0_1	P54753	2.83e-39	94	55.319
dd_Smed_v6_12797_0_1	Q8IVF4	0	412	39.563
dd_Smed_v6_12798_0_1	Q5T3U5	1.29e-158	193	42.487
dd_Smed_v6_12799_0_1	Q96EB6	6.53e-118	220	54.091
dd_Smed_v6_1279_0_1	P43686	0	404	85.644
dd_Smed_v6_127_0_1	Q92901	7.93e-179	221	71.946
dd_Smed_v6_12801_0_1	Q9BRQ4	2.12e-40	56	46.429
dd_Smed_v6_12806_0_1	O15457	2.19e-79	126	44.444
dd_Smed_v6_1280_0_1	P67775	0	304	89.803
dd_Smed_v6_12811_0_1	Q69YW2	5.3e-07	43	39.535
dd_Smed_v6_12812_0_1	O75382	5.44e-64	230	39.13
dd_Smed_v6_12813_0_1	Q96JM4	1.45e-06	35	45.714
dd_Smed_v6_12814_0_1	Q8N0V5	1.29e-30	90	42.222
dd_Smed_v6_12815_0_1	Q3L8U1	1.57e-170	193	66.321
dd_Smed_v6_12816_0_1	Q86YS7	2.55e-175	241	62.656
dd_Smed_v6_12818_0_1	O43913	3.81e-15	75	37.333
dd_Smed_v6_12821_0_1	Q9UDX3	2.01e-68	132	46.97
dd_Smed_v6_12823_0_1	O75794	3.43e-33	72	37.5
dd_Smed_v6_12825_0_1	P29973	3.08e-153	263	64.639
dd_Smed_v6_12828_0_1	Q96IW2	1.66e-19	81	50.617
dd_Smed_v6_1282_0_1	Q16539	5.51e-134	257	66.926
dd_Smed_v6_12832_0_1	Q8N1M1	3.25e-54	99	47.475
dd_Smed_v6_12833_0_1	Q86V25	5.44e-61	181	53.591
dd_Smed_v6_12834_0_1	Q96JY6	1.07e-08	21	61.905
dd_Smed_v6_12835_0_1	Q9P209	4.49e-50	138	47.826
dd_Smed_v6_12837_0_1	P78368	1.42e-29	83	57.831
dd_Smed_v6_12845_0_1	Q14678	1.73e-08	77	36.364
dd_Smed_v6_12847_0_1	Q9HC21	6.1e-61	92	45.652
dd_Smed_v6_12849_0_1	Q96K21	3.91e-11	49	46.939
dd_Smed_v6_1284_0_1	Q7RTX9	7.55e-06	51	35.294
dd_Smed_v6_12850_0_1	Q8N954	3.26e-11	69	37.681
dd_Smed_v6_12851_0_1	Q86UP8	1.41e-36	99	43.434
dd_Smed_v6_1285_0_1	Q96PK6	2.85e-13	71	42.254
dd_Smed_v6_12861_0_1	Q9UKT6	4.71e-07	45	46.667
dd_Smed_v6_12864_0_1	O94989	1.41e-28	53	49.057
dd_Smed_v6_12866_0_1	P20020	0	224	76.786
dd_Smed_v6_12867_0_1	Q9UHM6	7.66e-43	179	36.872
dd_Smed_v6_1286_0_1	P46734	1.41e-85	116	51.724
dd_Smed_v6_12872_0_1	Q9HCL0	1.45e-46	68	47.059
dd_Smed_v6_12873_0_1	P78426	9.61e-39	94	67.021
dd_Smed_v6_12878_0_1	P51168	2.56e-13	40	37.5
dd_Smed_v6_12879_0_1	Q9P215	2.71e-88	125	42.4
dd_Smed_v6_12881_0_1	Q9BXW9	3.09e-38	135	25.926
dd_Smed_v6_12883_0_1	Q9GZV3	9.17e-153	153	67.32
dd_Smed_v6_12884_0_1	P20226	1.97e-07	83	33.735
dd_Smed_v6_12888_0_1	Q13586	4.11e-42	107	43.925
dd_Smed_v6_1288_0_1	O60583	9.6e-26	76	44.737
dd_Smed_v6_12890_0_1	Q86SG6	6.97e-14	75	38.667
dd_Smed_v6_12892_0_1	Q658L1	1.55e-06	73	27.397
dd_Smed_v6_12893_0_1	Q5T9C2	1.33e-23	108	32.407
dd_Smed_v6_12894_0_1	Q9UKA1	5.65e-07	45	40
dd_Smed_v6_12895_0_1	Q6V0I7	1.53e-27	68	36.765
dd_Smed_v6_12899_0_1	P08865	2.21e-51	140	58.571
dd_Smed_v6_128_0_1	Q07020	3.94e-57	162	55.556
dd_Smed_v6_12905_1_1	Q86UP8	1.1e-07	34	44.118
dd_Smed_v6_12908_0_1	Q6P3W7	2.91e-56	127	30.709
dd_Smed_v6_12909_0_1	Q9Y5R4	1.3e-34	98	40.816
dd_Smed_v6_1290_0_1	P30044	3.57e-47	111	54.054
dd_Smed_v6_12912_0_1	Q9Y2D9	7.4e-13	70	28.571
dd_Smed_v6_12915_0_1	Q9BTX3	7.82e-19	31	58.065
dd_Smed_v6_12927_0_1	Q6P5Z2	1.06e-67	155	43.871
dd_Smed_v6_12929_0_1	Q96HU8	5.41e-23	100	43
dd_Smed_v6_1292_0_1	Q5SRE7	1.47e-05	39	41.026
dd_Smed_v6_12930_0_1	Q15022	1.51e-20	88	37.5
dd_Smed_v6_12933_0_1	P20594	8.41e-92	116	64.655
dd_Smed_v6_12936_0_1	Q9ULJ7	0	345	45.217
dd_Smed_v6_12939_2_1	P12644	5.98e-24	79	34.177
dd_Smed_v6_1293_0_1	Q9BYM8	2.28e-97	169	52.663
dd_Smed_v6_12942_0_1	Q8NBA8	3.38e-25	98	38.776
dd_Smed_v6_12946_0_1	O94812	7.06e-90	79	58.228
dd_Smed_v6_12951_0_1	Q49AG3	1.02e-51	82	42.683
dd_Smed_v6_12955_0_1	Q13563	1.07e-130	91	56.044
dd_Smed_v6_12956_0_1	P49247	2.3e-76	171	54.971
dd_Smed_v6_12959_0_1	Q8N9F8	0.000356	40	32.5
dd_Smed_v6_1295_0_1	Q96A49	4.07e-31	83	55.422
dd_Smed_v6_12960_0_1	O94842	0.000289	52	34.615
dd_Smed_v6_12961_0_1	Q12888	3.38e-05	63	34.921
dd_Smed_v6_12962_0_1	O95551	2.24e-16	52	40.385
dd_Smed_v6_12963_0_1	Q9H4G4	5.16e-22	38	52.632
dd_Smed_v6_12964_0_1	Q13183	6.14e-96	142	50
dd_Smed_v6_12966_0_1	P28340	0	320	65.938
dd_Smed_v6_12969_0_1	Q9Y592	6.66e-28	166	24.096
dd_Smed_v6_12972_0_1	P54577	1.88e-31	80	62.5
dd_Smed_v6_12974_0_1	P0C6S8	4.2e-07	49	42.857
dd_Smed_v6_12977_0_1	Q9Y2J0	1.97e-79	133	49.624
dd_Smed_v6_12978_0_1	Q9NS40	4.21e-137	193	61.14
dd_Smed_v6_1297_0_1	P12955	0	369	58.266
dd_Smed_v6_12980_0_1	Q9BQF6	1.96e-36	93	35.484
dd_Smed_v6_12981_0_1	P16260	2.18e-55	53	52.83
dd_Smed_v6_12984_0_1	O75648	7.1e-78	115	53.043
dd_Smed_v6_12985_0_1	Q9UDT6	3.92e-07	59	40.678
dd_Smed_v6_12986_0_1	Q7RTM1	2.61e-15	73	27.397
dd_Smed_v6_12987_0_1	P49366	8.58e-137	204	66.176
dd_Smed_v6_12988_0_1	Q17RH7	4.28e-06	27	44.444
dd_Smed_v6_12990_0_1	P32418	6.28e-54	136	61.765
dd_Smed_v6_12991_0_1	A8MTZ0	1.85e-09	64	34.375
dd_Smed_v6_12992_0_1	P17787	4.03e-72	140	52.857
dd_Smed_v6_12996_0_1	Q01082	0	494	66.397
dd_Smed_v6_12998_0_1	P21802	8.42e-77	102	51.961
dd_Smed_v6_12999_0_1	Q14973	6.11e-15	130	27.692
dd_Smed_v6_1299_0_1	P04035	1.57e-87	225	44
dd_Smed_v6_129_2_1	Q12933	4.52e-19	84	45.238
dd_Smed_v6_12_0_1	Q96N68	0.000198	32	43.75
dd_Smed_v6_13001_0_1	Q8NEL9	9.85e-80	110	60.909
dd_Smed_v6_13002_0_1	Q9BQG2	5.38e-28	66	42.424
dd_Smed_v6_13003_0_1	P08684	9.23e-70	111	40.541
dd_Smed_v6_13005_0_1	O00409	8.75e-27	64	62.5
dd_Smed_v6_13009_0_1	Q9UPW0	1.19e-19	75	46.667
dd_Smed_v6_13010_0_1	P78424	1.32e-66	70	74.286
dd_Smed_v6_13011_0_1	P05187	3.46e-67	89	49.438
dd_Smed_v6_13014_0_1	Q53H47	8.36e-24	37	48.649
dd_Smed_v6_13016_0_1	O15031	6e-21	59	38.983
dd_Smed_v6_13017_0_1	Q9HCR9	7.59e-142	375	46.133
dd_Smed_v6_13018_0_1	Q9Y4K3	2.14e-05	65	32.308
dd_Smed_v6_13019_0_1	Q4AC94	3e-64	111	39.64
dd_Smed_v6_1301_0_1	Q9UL68	1.7e-07	107	30.841
dd_Smed_v6_13024_0_1	P26572	4.85e-76	129	52.713
dd_Smed_v6_1302_0_1	Q99873	2.78e-93	158	66.456
dd_Smed_v6_13034_0_1	Q9BZE2	5.62e-75	107	46.729
dd_Smed_v6_1303_0_1	Q5BN46	1.49e-07	49	38.776
dd_Smed_v6_13040_0_1	Q9Y5E8	3.45e-54	97	41.237
dd_Smed_v6_13041_0_1	O75628	5.2e-09	52	42.308
dd_Smed_v6_13044_0_1	Q6PF15	0.001	33	45.455
dd_Smed_v6_13045_0_1	Q8TER0	1.03e-08	30	46.667
dd_Smed_v6_13047_0_1	Q8NE62	3.37e-11	32	43.75
dd_Smed_v6_13048_0_1	Q13507	1.47e-112	139	50.36
dd_Smed_v6_1304_0_1	P12081	1.52e-113	107	60.748
dd_Smed_v6_13054_0_1	P28340	0	346	54.913
dd_Smed_v6_13056_0_1	Q9NQB0	6.78e-46	85	84.706
dd_Smed_v6_13058_0_1	Q8TD57	2.09e-176	413	40.436
dd_Smed_v6_1305_0_1	Q8N6L1	5.86e-22	62	53.226
dd_Smed_v6_13061_0_1	Q12933	2.13e-20	88	35.227
dd_Smed_v6_13062_0_1	Q8WTT2	2.9e-24	105	40
dd_Smed_v6_13063_0_1	Q96PU8	2.03e-57	118	61.017
dd_Smed_v6_13064_0_1	Q7Z5J8	0	122	53.279
dd_Smed_v6_1306_0_1	Q8NCC3	2.14e-46	50	38
dd_Smed_v6_13071_0_1	Q4LDE5	1.22e-25	116	33.621
dd_Smed_v6_13072_0_1	Q8TDN6	2.75e-33	82	35.366
dd_Smed_v6_13074_0_1	Q16572	3.21e-12	100	25
dd_Smed_v6_13078_0_1	O60583	3.03e-19	39	38.462
dd_Smed_v6_13079_0_1	P60880	6.77e-60	103	50.485
dd_Smed_v6_1307_0_1	Q99470	2e-55	66	59.091
dd_Smed_v6_13082_0_1	Q00532	2.14e-109	152	53.947
dd_Smed_v6_13085_0_1	Q9BWT3	3.51e-31	67	32.836
dd_Smed_v6_13086_0_1	Q99880	5.62e-35	73	86.301
dd_Smed_v6_13087_0_1	P00156	1.42e-143	177	80.226
dd_Smed_v6_13088_0_1	Q9BZQ6	2.01e-87	112	70.536
dd_Smed_v6_1308_0_1	O00463	1.03e-12	38	39.474
dd_Smed_v6_13092_0_1	A5PLN7	6.16e-14	41	36.585
dd_Smed_v6_13093_0_1	Q8N568	3.02e-24	97	34.021
dd_Smed_v6_13094_0_1	Q8N3Z6	1.14e-13	58	39.655
dd_Smed_v6_1309_0_1	Q969T9	2.18e-33	73	45.205
dd_Smed_v6_130_0_1	P27635	2.57e-109	210	74.762
[truncated: 11,413 more rows]

## Sheet: F7SD1-F. TBLASTX_human_vs_smed
Query	Smed_v6_ID	eval	length	ident
[truncated: 7,220 more rows]

[truncated: 3 more sheets: F7SD1-G. 5583_RBH_homologs, F7SD1-H. 700_RBH_gut_homologs, LEGEND]
