# Supplementary material for: Cell-type diversity and regionalized gene expression in the planarian intestine
Source: eLife. 2020 Apr 2;9:e52613. doi: 10.7554/eLife.52613 (PMC7117911; doi:10.7554/eLife.52613)
Supplement: Figure 8—source data 1. [file elife-52613-fig8-data1.xlsx]

## Sheet: F8SD1-A. Feeding and Viability
			No Phenotype		Moderate phenotypes		Severe
		total # animals	animals normal (cumulative)	percent	Non-eater - removed from experiment (cumulative)	percent	Fully lysed, or severe lesions, or curling - removed (cumulative)	percent
Biological Replicate 1
0 days	1X feed - egfp	20	20	1	0	0	0	0
0 days	1X feed - gli-1	18	18	1	0	0	0	0
0 days	1X feed - RREB2	19	19	1	0	0	0	0
7 days	2X feed - egfp	20	20	1		0		0
7 days	2X feed - gli-1	18	18	1	0	0		0
7 days	2X feed - RREB2	19	19	1		0		0
14 days	3X feed - egfp	20	20	1		0		0
14 days	3X feed - gli-1	18	15	0.833333	3	0.166667		0
14 days	3X feed - RREB2	19	19	1		0		0
21 days	4X feed - egfp	20	20	1		0		0
21 days	4X feed - gli-1	18	14	0.777778	4	0.222222		0
21 days	4X feed - RREB2	19	19	1		0		0
28 days	5X feed - egfp	20	20	1		0		0
28 days	5X feed - gli-1	18	13	0.722222	5	0.277778		0
28 days	5X feed - RREB2	19	10	0.526316	0	0	9	0.473684
35 days	6X feed - egfp	20	20	1		0		0
35 days	6X feed - gli-1	18	11	0.611111	7	0.388889		0
35 days	6X feed - RREB2	19	8	0.421053	1	0.0526316	10	0.526316
Biological Replicate 2
0 days	1X feed - egfp	20	20	1	0	0	0	0
0 days	1X feed - gli-1	18	18	1	0	0	0	0
0 days	1X feed - RREB2	18	18	1	0	0	0	0
7 days	2X feed - egfp	20	20	1	0	0	0	0
7 days	2X feed - gli-1	18	18	1	0	0	0	0
7 days	2X feed - RREB2	18	18	1	0	0	0	0
14 days	3X feed - egfp	20	20	1	0	0	0	0
14 days	3X feed - gli-1	18	17	0.944444	0	0	1	0.0555556
14 days	3X feed - RREB2	18	18	1	0	0	0	0
21 days	4X feed - egfp	20	20	1	0	0	0	0
21 days	4X feed - gli-1	18	17	0.944444	0	0	1	0.0555556
21 days	4X feed - RREB2	18	18	1	0	0	0	0
28 days	5X feed - egfp	20	20	1	0	0	0	0
28 days	5X feed - gli-1	18	17	0.944444	0	0	1	0.0555556
28 days	5X feed - RREB2	18	18	1	0	0	0	0
35 days	6X feed - egfp	20	20	1	0	0	0	0
35 days	6X feed - gli-1	18	16	0.888889	1	0.0555556	1	0.0555556
35 days	6X feed - RREB2	18	17	0.944444	0	0	1	0.0555556
Biological Replicate 3
0 days	1X feed - egfp	20	20	1		0		0
0 days	1X feed - gli-1	20	20	1		0		0
0 days	1X feed - RREB2	20	20	1		0		0
7 days	2X feed - egfp	20	20	1		0		0
7 days	2X feed - gli-1	20	20	1		0		0
7 days	2X feed - RREB2	20	20	1		0		0
14 days	3X feed - egfp	20	20	1		0		0
14 days	3X feed - gli-1	20	20	1		0		0
14 days	3X feed - RREB2	20	20	1		0		0
21 days	4X feed - egfp	20	20	1		0		0
21 days	4X feed - gli-1	20	20	1		0		0
21 days	4X feed - RREB2	20	20	1		0		0
28 days	5X feed - egfp	20	20	1		0		0
28 days	5X feed - gli-1	20	18	0.9	1	0.05	1	0.05
28 days	5X feed - RREB2	20	20	1		0		0
35 days	6X feed - egfp	20	18	0.9	1	0.05	1	0.05
35 days	6X feed - gli-1	20	16	0.8	2	0.1	2	0.1
35 days	6X feed - RREB2	20	14	0.7	1	0.05	5	0.25

## Sheet: F8SD1-B. Area and Length
Area							Length
pretreat control (mm2)	pretreat gli-1 (mm2)	pretreat RREB2 (mm2)	5x fed control (mm2)	5x fed gli-1 (mm2)	5x fed RREB2 (mm2)		pretreat control (mm)	pretreat gli-1 (mm)	pretreat RREB2 (mm)	5x fed control (mm)	5x fed gli-1 (mm)	5x fed RREB2 (mm)
1293.87	1682.52	1378.93	1723.31	2911.57	2162.84		2.60606	2.74921	2.41098	2.76775	3.71528	2.88803
2098.84	1226.34	1360.27	2536.1	2091.5	1771.05		3.38355	2.28207	2.50125	3.81562	3.10831	2.09148
1919.25	883.765	1256.99	2458.1	1867.83	1273.44		3.2098	1.64047	2.27274	3.45106	2.98463	2.49295
1479.84	757.228	1746.14	3351.87	2101.01	1569.81		2.60843	1.32165	2.44171	4.01788	2.95238	2.127
1107.84	1338.59	1667.21	3024.75	2426.74	2772.43		2.28455	2.30702	2.77847	3.57545	3.55391	3.11319
1538.65	1260.18	1759.15	1762.9	1400.19	1420.64		2.74611	2.61123	2.574	2.80962	2.39011	1.84918
1285.12	1757.13	1922.68	2257.16	3127.01	1800.17		2.37897	2.75691	2.73848	3.30372	4.24252	2.88044
1887.19	1560.78	1385.5	1826.15	1330.85	1183.65		2.93364	2.24295	2.61593	3.1485	2.22861	1.81652
1379.88	1421.01	1974.04	1929.38	2335.74	564.421		2.65769	2.81411	2.94939	2.94052	3.47822	1.17235
1317.86	1244.63	1613.25	5425.47	616.268	958.939		2.49592	1.99844	2.6796	5.7601	1.24731	1.54011
1700.49	938.186	1340.12	1535	2690.73	1741.86		3.07492	1.7984	2.48174	2.4829	3.68611	3.1091
2022.98	1779.86	1236.15	1868.01	1624.38	1666.29		3.13622	2.56111	2.19442	3.24634	2.63448	2.58255
1246.47	1106.52	1205.91	1256.81	1362.05	1336.35		2.38456	2.12056	2.4898	2.37912	2.52865	2.8188
1536.87	1482.67	1236.62	2160.91	1488.45	1303.26		2.70184	2.47432	2.21103	3.29199	2.71067	2.56791
1911.76	1306.51	1678.67	3376.29	1538.55	1778.73		2.73482	2.19315	2.68917	3.76128	2.61435	2.96578
1420.66	1549.61	1275.03	3495.2	2771.26	1142.21		2.67963	2.56298	2.70681	4.27951	3.76493	2.6023
1485.74	1538.98	1434.4	1438.62	623.937	1263.97		2.76041	2.64903	2.51885	2.65402	1.50295	2.54293
854.821	1391.69	1396.13	1546.75	1059.05	1288.53		2.07815	2.62146	2.58032	2.68197	2.26555	2.43066
1378.86	1451.26	1550.99	1597.51	1483.85	1846.46		2.45779	2.74001	2.67973	2.46416	2.70892	3.20712
1314.53	1693.57	1783.5	883.861	1273.16	1870.72		2.60415	2.64692	3.00572	2.03678	2.39818	2.88373
1513.07	2092.91	2694.97	1928.53	890.893	2184.96		3.03371	3.41044	3.54961	2.92939	1.98727	3.2243
1487.27	2739.5	1827.19	3048.26	1526.36	2520.82		2.82386	3.90329	2.90334	4.21913	2.87408	4.09363
1446.01	1650.53	1818.06	1827.95	2349.67	1323.95		2.74243	2.89132	3.15944	3.0069	3.48771	2.86255
2112.24	1851.27	1806.11	2004.64	1928.8	2113.24		3.36859	3.08726	2.95824	3.59783	3.10117	3.20512
1462.83	2176.46	1568.55	1480.07	2804.48	1173.34		2.58687	3.34856	2.68834	2.55415	3.68804	2.43312
2040.12	1751.78	2154.86	911.584	3178.4	1945.32		3.31982	3.25217	3.67209	2.08619	4.33046	2.94644
1849.39	1410.01	1569.19	1458.72	2961.93	2879.92		3.34303	2.88127	2.74501	2.60784	3.68331	4.69395
1535.91	1251.9	1524.42	2921.94	4209.29	2156.67		2.88995	2.81009	2.69799	3.81389	5.48972	3.8275
1591.69	1679.84	2089.52	1440.38	822.255	1609.75		2.75866	3.06962	3.35843	2.60203	1.91571	2.80563
2126	1522.39	2002.19	1027.26	984.426	799.235		3.12874	2.7187	3.59359	1.9883	2.05556	1.94812
2228.67	1844.52	1845.43	939.807	1791.92	2210.73		3.54877	3.31781	3.19065	2.06646	3.10345	4.03208
2143.15	2252.96	1947.53	1267.6	2842.17	2864.43		3.47966	3.855	3.09039	2.4255	4.31105	4.32782
1371.63	1751.05	1409.35	2041.72	1268.53	2567.17		2.61763	2.7926	2.77926	3.13504	2.51131	4.03525
2077.72	1561.08	1658.34	957.443	2264.64	1943.65		3.32736	2.84691	2.8899	2.04766	3.41582	2.84188
1611.45	1963.98	1482.43	1590.39	1759.37	1210.48		2.98322	3.20903	2.65358	2.90287	3.06971	2.65081
1155.91	1770.74	2181.21	643.054	1066.31	851.931		2.51245	3.16602	3.47966	1.74884	2.0809	2.18953
1699.35	1521.82	1696.21	1416.24	2306.11			3.32318	2.86535	3.12304	2.97824	3.58897
1541.3	1511.5	2048.02	833.539	1840.71			2.73905	2.96583	3.31531	2.14811	3.27054
1980.2	2001.19	2162.06	1409.95	2714.36			3.23543	3.25251	3.53505	2.52455	3.49181
1625.7	1877.8	1659.76	2385.79	1615.44			3.12761	3.1178	3.04571	3.39002	2.79946
2622.07	1893.62	2494.08	718.922	1520.18			3.333	3.20661	3.83869	1.73376	2.75253
1790.83	1890.14	1515.89	2292.01				2.96578	3.14977	2.87356	3.58187
1689.25	2287.9	2737.96	3308.23				2.80252	3.48947	3.88343	4.26406
2308.8	1683.71	2011.75	3563.09				3.59022	2.73069	3.37384	4.70699
2398.73	2556.73	1712.27	2610.12				3.55153	4.04788	3.16753	3.28217
1744.21	2334.76	2572.19	1708.58				3.21327	3.64989	3.77774	2.93816
2288.17	2171.77	1981.34	5432.48				3.47774	3.25012	3.33447	5.25429
2603.77	2300.51	2034.65	2823.35				4.05057	3.61952	3.25556	4.06564
3387.09	1983.7	2097.23	1411.01				4.41057	3.18877	3.35766	2.58434
2973.91	2063.38	2215.36	3150.33				3.96344	3.30103	3.30499	3.85366
2066.89	1789.95	1992.93	1782.9				3.78181	3.0768	3.22477	2.7961
2097.75	2383.67	1502.67	1932.31				3.21428	3.71715	2.89818	3.57746
1623.85	1462.95	1674.85	2231.72				2.70243	2.53102	2.80995	3.27054
1796.58	2077.93	1828.34	1987.21				2.5609	3.31584	3.04357	3.489
1574.39	2331.64	1829.49	1747.63				2.66566	3.5695	2.6208	3.1056
1162.02	2695.82	1777.19	1380.64				2.15013	3.90489	3.2398	2.55415
1807.71	1767.69	2493.2	2889.21				3.01065	3.16705	3.35928	3.84984
2107.73	2407.48	1776.67					2.86511	3.69018	2.97165
2019.07	1782.81	2589.16					3.12861	3.3091	3.93396
2228.15	1921.45	2159.64					3.01458	3.25117	3.3609

## Sheet: F8SD1-C. Statistics
Table Analyzed - AREA												Table Analyzed - LENGTH
Brown-Forsythe ANOVA test												Brown-Forsythe ANOVA test
F* (DFn, DFd)	2.213 (5.000, 191.7)											F* (DFn, DFd)	0.9763 (5.000, 209.4)
P value	0.0547											P value	0.4332
P value summary	ns											P value summary	ns
Significant diff. among means (P < 0.05)?	No											Significant diff. among means (P < 0.05)?	No
Welch's ANOVA test												Welch's ANOVA test
W (DFn, DFd)	1.355 (5.000, 130.0)											W (DFn, DFd)	0.7018 (5.000, 129.7)
P value	0.2456											P value	0.6231
P value summary	ns											P value summary	ns
Significant diff. among means (P < 0.05)?	No											Significant diff. among means (P < 0.05)?	No
Data summary												Data summary
Number of treatments (columns)	6											Number of treatments (columns)	6
Number of values (total)	314											Number of values (total)	314
Number of families	1											Number of families	1
Number of comparisons per family	4											Number of comparisons per family	4
Alpha	0.05											Alpha	0.05
Dunnett's T3 multiple comparisons test	Mean Diff.	95.00% CI of diff.	Significant?	Summary	Adjusted P Value							Dunnett's T3 multiple comparisons test	Mean Diff.	95.00% CI of diff.	Significant?	Summary	Adjusted P Value
pretreat control vs. pretreat gli-1	28.84	-198.5 to 256.1	No	ns	0.9941	A-B						pretreat control vs. pretreat gli-1	0.03733	-0.2256 to 0.3003	No	ns	0.991	A-B
pretreat control vs. pretreat RREB2	-21.2	-236.4 to 194.0	No	ns	0.9978	A-C						pretreat control vs. pretreat RREB2	-0.005317	-0.2328 to 0.2222	No	ns	>0.9999	A-C
5x fed control vs. 5x fed gli-1	148.2	-359.9 to 656.4	No	ns	0.8825	D-E						5x fed control vs. 5x fed gli-1	0.1148	-0.3605 to 0.5900	No	ns	0.9364	D-E
5x fed control vs. 5x fed RREB2	373	-86.95 to 833.0	No	ns	0.0986	D-F						5x fed control vs. 5x fed RREB2	0.3047	-0.1721 to 0.7814	No	ns	0.271	D-F
Test details	Mean 1	Mean 2	Mean Diff.	SE of diff.	n1	n2	t	DF				Test details	Mean 1	Mean 2	Mean Diff.	SE of diff.	n1	n2	t	DF
pretreat control vs. pretreat gli-1	1785	1756	28.84	81.75	60	60	0.3528	117.4				pretreat control vs. pretreat gli-1	2.988	2.95	0.03733	0.09452	60	60	0.395	113.7
pretreat control vs. pretreat RREB2	1785	1806	-21.2	77.37	60	60	0.274	113.6				pretreat control vs. pretreat RREB2	2.988	2.993	-0.005317	0.08182	60	60	0.06499	117.3
5x fed control vs. 5x fed gli-1	2069	1921	148.2	182	57	41	0.8144	94.75				5x fed control vs. 5x fed gli-1	3.132	3.018	0.1148	0.1698	57	41	0.6758	86.3
5x fed control vs. 5x fed RREB2	2069	1696	373	164.6	57	36	2.266	90.68				5x fed control vs. 5x fed RREB2	3.132	2.828	0.3047	0.1699	57	36	1.793	78.07

## Sheet: LEGEND
Figure 8–source data 1. Numerical data for gli-1 and RREB2 phenotypes, including feeding, viability, area, and length data
Worksheet		Legend
F8-SD-1A. Feeding and Viability Data		Detailed numerical data for three biological replicates conducted for control, gli-1, and RREB2 RNAi phenotypes.
F8-SD-1B. Area and Length Data		Individual measurements for area and length of the control, gli-1, and RREB2 knockdowns before any treatment and after 5 feedings.
F8-SD-1C. Area and Length Statistics		Statistical analysis of area and length measurements conducted in GraphPad Prism v8.3.0
Columns (F8-SD-1A)		A	Number of days after the first feeding
		B	Condition name and feeding number
		C	Total number of animals in experiment
		D	Cumulative number of animals with No Phenotype
		E	Cumulative percent of animals with No Phenotype
		F	Cumulative number of animals with a Moderate Phenotype (2x Non-eater - i.e. refused food on days 7 and 8 after the previous RNAi feeding)
		G	Cumulative percent of animals with a Moderate Phenotype (2x Non-eater - i.e. refused food on days 7 and 8 after the previous RNAi feeding)
		H	Cumulative number of animals with a Severe Phenotype (Fully lysed, or severe lesions, or curling)
		I	Cumulative percent of animals with a Severe Phenotype (Fully lysed, or severe lesions, or curling)
Columns (F8-SD-1B)		A-F	Area measurements for each animal. n=20 individuals at the beginning of N=3 independent experiments for a total of n=60. Non-eating and dead animals were not included in final (5x-fed) size analysis. Note that a pre-treat and a 5x animal on the same line may or may not be the same animal, because animals were pooled for feedings, and individuals were not tracked.
		H-M	Length measurements for each animal. These are the identical animals/images used for area, simply measured for length instead.
Columns (F8-SD-1C)		A-I	Statistical analysis of Area measurements
		M-U	Statstical analysis of Length measurements
