# Supplementary material for: Cell-type diversity and regionalized gene expression in the planarian intestine
Source: eLife. 2020 Apr 2;9:e52613. doi: 10.7554/eLife.52613 (PMC7117911; doi:10.7554/eLife.52613)
Supplement: Supplementary file 1. — (S1A) Summary of RNA-Seq data and whole-animal in situ expression patterns for 1844 transcripts enriched in laser-captured planarian intestine, together with phagocyte expression, single-cell RNA-Seq data, best BLAST hits for human/mouse/zebrafish/fly/C. elegans, cloning primers, and transcript sequences. Single-cell data from Plass et al. (2018) reprinted with permission from AAAS. (S1B) Figure locations for transcript expression patterns shown in the manuscript. [file elife-52613-supp1.xlsx]

## Sheet: S1A. 1844 Intestine-enriched
geneID	ID_used_in_paper	uniprot_id_human	uniprot_desc_human	length	logFC_medial	logCPM_medial	FDR_medial	logFC_lateral	logCPM_lateral	FDR_lateral	FC_medial	FC_lateral	ML_ratio	ML_color_code	phagocyte_EST_ID	phagocyte_log2FC	phagocyte_avgExpr	phagocyte_FDR	WISH_pattern	Fincher_S2_all_clusterIDs	Fincher_S2_all_celltypes	Fincher_S2_intestine_subcluster_IDs	Plass_S3_all_celltypes	Swapna_Seurat_cluster	uniprot_acc_human	uniprot_id_human	uniprot_desc_human	eval_human	length_human	pct_ident_human	uniprot_acc_mouse	uniprot_id_mouse	uniprot_desc_mouse	eval_mouse	length_mouse	pct_ident_mouse	uniprot_acc_zfish	uniprot_id_zfish	uniprot_desc_zfish	eval_zfish	length_zfish	pct_ident_zfish	uniprot_acc_fly	uniprot_id_fly	uniprot_desc_fly	eval_fly	length_fly	pct_ident_fly	uniprot_acc_worm
dd_Smed_v6_1_0_1	novel	NA	NA	416	6.49054	16.7728	3.05e-33	6.35771	16.7728	2.96e-32	89.9179	82.0091	1.09644	darkblue	Contig4465	4.83036	14.3184	2.29e-05	uniform	30	Intestine	4	phagocytes	NA	NA	NA	NA	NA	NA	NA	NA	NA	NA	NA	NA	NA	NA	NA	NA	NA	NA	NA	NA	NA	NA	NA	NA	NA	NA
dd_Smed_v6_10_1_1	zgc:172053	COLEC10	Collectin-10	730	4.57657	13.7949	7.67e-30	4.82941	13.7949	2.55e-32	23.8609	28.4314	0.839244	dodgerblue	Contig4399	-0.119826	12.7967	0.697142	basal	19,30	Intestine	5	NA	NA	Q9Y6Z7	COLEC10	Collectin-10	1.61e-07	132	23.485	P50404	Sftpd	Pulmonary surfactant-associated protein D	1.11e-07	103	29.126	A9JRA9	zgc:172053	Zgc:172053	1.71e-10	147	26.531	Q9W0I2	tfc	RE15268p	3.13e-07	115	32.174	Q9XUL7
dd_Smed_v6_100_0_1	novel	NA	NA	733	6.84412	8.57273	3.34e-40	7.16661	8.57273	9.34e-43	114.891	143.669	0.799689	dodgerblue	Contig60	4.0523	11.8123	3.32e-05	uniform	6,19,24,30	Intestine,Epidermal	4	neoblast 1,muscle progenitors,secretory 4,phagocytes	Gut	NA	NA	NA	NA	NA	NA	NA	NA	NA	NA	NA	NA	NA	NA	NA	NA	NA	NA	NA	NA	NA	NA	NA	NA	NA
dd_Smed_v6_10002_0_1	NA	GNPTG	N-acetylglucosamine-1-phosphotransferase subunit gamma	904	3.03691	1.46492	0.000308495	3.42874	1.46492	5.73e-05	8.20731	10.7685	0.762161	dodgerblue	Contig1198	1.33243	7.72052	0.000156056	NA	NA	NA	NA	NA	NA	Q9UJJ9	GNPTG	N-acetylglucosamine-1-phosphotransferase subunit gamma	4.88e-24	152	32.895	Q6S5C2	Gnptg	N-acetylglucosamine-1-phosphotransferase subunit gamma	3.77e-24	159	32.075	A0A0R4ILT4	prkcsh	Protein kinase C substrate 80K-H	4.77e-14	113	35.398	Q9VJD1	GCS2beta	Glucosidase 2 beta subunit, isoform A	5.06e-11	107	32.71	NA
dd_Smed_v6_1002_0_1	NA	SORD	Sorbitol dehydrogenase	1430	2.67655	7.89183	4.02e-21	2.58944	7.89183	6.82e-20	6.39326	6.01866	1.06224	darkblue	Contig3716	0.389085	9.23378	0.00909352	NA	6,10,19,30	Intestine,Cathepsin+ cell	7	NA	NA	Q00796	SORD	Sorbitol dehydrogenase	3.74e-115	343	51.312	Q64442	Sord	Sorbitol dehydrogenase	8.77e-119	343	52.77	Q7T2J4	adh8b	Alcohol dehydrogenase 8b	1.8e-22	349	26.074	O97479	Sodh-1	FI05212p	1.88e-118	350	54.857	Q9UAT1
dd_Smed_v6_10025_0_1	NA	NA	NA	620	3.36614	3.88147	6.18e-19	3.40522	3.88147	2.84e-19	10.3112	10.5943	0.97328	dodgerblue	Contig6864	1.03401	6.85262	0.00379773	NA	NA	NA	NA	NA	NA	NA	NA	NA	NA	NA	NA	NA	NA	NA	NA	NA	NA	NA	NA	NA	NA	NA	NA	NA	NA	NA	NA	NA	NA	NA
dd_Smed_v6_10035_0_1	NA	NA	NA	1485	1.71869	2.34424	0.00589646	2.08734	2.34424	0.000778328	3.29136	4.24964	0.774504	dodgerblue	NA	NA	NA	NA	NA	NA	NA	NA	NA	NA	NA	NA	NA	NA	NA	NA	NA	NA	NA	NA	NA	NA	NA	NA	NA	NA	NA	NA	NA	NA	NA	NA	NA	NA	NA
dd_Smed_v6_10043_0_1	NA	NA	NA	721	6.05319	4.42858	1.29e-25	6.11517	4.42858	5.88e-26	66.4034	69.3187	0.957944	dodgerblue	Contig1558	0.795813	6.51008	0.00530423	NA	30	Intestine	4	NA	NA	NA	NA	NA	NA	NA	NA	NA	NA	NA	NA	NA	NA	NA	NA	NA	NA	NA	NA	NA	NA	NA	NA	NA	NA	NA
dd_Smed_v6_10051_0_1	NA	STRA6	Stimulated by retinoic acid gene 6 protein homolog	2128	4.2524	3.29572	2.95e-13	4.24516	3.29572	3.67e-13	19.059	18.9636	1.00503	darkblue	PL08004A2G12	0.433905	6.35905	0.296496	NA	29	Protonephridia	NA	NA	NA	Q9BX79	STRA6	Stimulated by retinoic acid gene 6 protein homolog	2.01e-09	185	24.324	Q9DBN1	Stra6l	Stimulated by retinoic acid gene 6 protein-like	9.41e-15	273	27.839	F1QCP7	stra6l	STRA6-like	8.11e-20	586	24.744	NA	NA	NA	NA	NA	NA	NA
dd_Smed_v6_10059_0_1	NA	NA	NA	942	3.70599	3.43055	4.64e-20	3.39425	3.43055	2.83e-17	13.0501	10.5141	1.2412	darkblue	Contig3003	0.516411	6.81272	0.0338611	NA	6,22,29	Intestine,Neoblast,Protonephridia	0,6	NA	NA	NA	NA	NA	NA	NA	NA	NA	NA	NA	NA	NA	NA	NA	NA	NA	NA	NA	NA	NA	NA	NA	NA	NA	NA	NA
dd_Smed_v6_10070_0_1	NA	ARHGAP26	Rho GTPase-activating protein 26	2531	1.67752	3.06475	0.000841772	1.57794	3.06475	0.00203955	3.19879	2.98543	1.07146	darkblue	NA	NA	NA	NA	NA	14	Muscle	NA	NA	NA	Q9UNA1	ARHGAP26	Rho GTPase-activating protein 26	3.06e-87	611	30.606	Q6ZQ82	Arhgap26	Rho GTPase-activating protein 26	2.26e-87	611	30.442	Q5XIX9	chn1	Chimerin 1	6.34e-24	191	33.508	Q9VXQ2	Graf	GRAF ortholog, isoform A	9.58e-70	618	30.421	Q8MPT2
dd_Smed_v6_1008_0_1	NA	RNASET2	Ribonuclease T2	1002	5.88872	7.43381	8.87e-46	5.55056	7.43381	5.81e-42	59.2492	46.8688	1.26415	darkblue	Contig758	4.26327	11.7994	2.29e-05	no_signal	17,30,31	Cathepsin+ cell,Intestine	4	NA	Gut	O00584	RNASET2	Ribonuclease T2	6.64e-18	132	33.333	C0HKG6	Rnaset2b	Ribonuclease T2-B	8.06e-16	132	32.576	B8XY56	rnaset2	Ribonuclease T2	5.48e-23	228	33.772	Q95TA4	RNaseX25	GH08338p	1.69e-19	192	31.771	NA
dd_Smed_v6_1009_0_1	NA	LIN7B	Protein lin-7 homolog B	708	1.04968	7.46663	0.000244935	0.867773	7.46663	0.00337201	2.07007	1.82484	1.13438	darkblue	Contig5190	0.824981	9.21782	0.00122862	NA	18,21,29	Neural,Protonephridia	NA	NA	Early_epithelial_progeny	Q9HAP6	LIN7B	Protein lin-7 homolog B	2.02e-98	190	76.316	O88951	Lin7b	Protein lin-7 homolog B	1.75e-99	190	77.368	Q66IB0	lin7c	Lin-7 homolog C (C. elegans)	2e-97	195	77.436	Q9VBY7	veli	RE46718p	5.93e-96	189	79.365	A5PEX5
dd_Smed_v6_1009_1_1	NA	SLC8B1	Sodium/potassium/calcium exchanger 6, mitochondrial	1216	3.40152	5.36096	2.3e-33	3.29658	5.36096	1.33e-31	10.5672	9.82584	1.07545	darkblue	PL05007B1C09	2.08704	8.16411	0.000799309	NA	10,28,30	Cathepsin+ cell,Intestine	4	NA	NA	Q6J4K2	SLC8B1	Sodium/potassium/calcium exchanger 6, mitochondrial	2.76e-44	254	37.402	Q925Q3	Slc8b1	Sodium/potassium/calcium exchanger 6, mitochondrial	3.8e-47	319	31.348	F1RAZ0	slc24a4a	Solute carrier family 24 (sodium/potassium/calcium exchanger), member 4a	2.76e-10	154	27.922	Q9U6A0	Nckx30C	Sodium/potassium/calcium exchanger Nckx30C	9.32e-10	100	35	G5EC02
dd_Smed_v6_101_0_1	eppin	EPPIN	Eppin	502	4.20835	12.4895	1.05e-23	6.34884	12.4895	1.86e-43	18.4858	81.5063	0.226803	darkorange	Contig6658	-1.35649	11.0214	0.00197665	goblet	19	Intestine	2,5,8	goblet cells	NA	O95925	EPPIN	Eppin	4.7e-11	61	42.623	Q3UW09	Spint3	Putative uncharacterized protein	3.17e-10	51	49.02	F1Q4X1	col6a3	Collagen, type VI, alpha 3	1.88e-06	46	47.826	Q868Z9	Ppn	Papilin	8.82e-09	59	44.068	A5A8R1
dd_Smed_v6_10103_0_1	RREB2	RREB1	Ras-responsive element-binding protein 1	1789	1.5458	2.52489	0.00475282	2.04319	2.52489	0.000156812	2.91966	4.12156	0.708389	dodgerblue	Contig7148	-0.0947495	6.30142	0.465758	low	12,19	Parapharyngeal,Intestine	2,3,5	NA	Parapharyngeal	Q92766	RREB1	Ras-responsive element-binding protein 1	4.2e-14	49	61.224	Q3UH06	Rreb1	Ras-responsive element-binding protein 1	2.39e-14	49	61.224	F1R609	rreb1a	Ras-responsive element-binding protein 1a	3.86e-17	149	36.913	Q7K3V3	peb	GH10905p	2.11e-14	92	44.565	G5EFF4
dd_Smed_v6_10130_0_1	NA	GRM3	Metabotropic glutamate receptor 3	3170	7.35115	3.57603	2.5e-08	7.50634	3.57603	1.78e-08	163.274	181.817	0.898013	dodgerblue	NA	NA	NA	NA	NA	30	Intestine	4	NA	NA	Q14832	GRM3	Metabotropic glutamate receptor 3	2.53e-79	866	27.714	Q9QYS2	Grm3	Metabotropic glutamate receptor 3	8.13e-80	867	27.451	E7FDL9	grm2a	Glutamate receptor, metabotropic 2a	3.16e-86	866	28.637	Q70GQ8	mtt	Metabotropic X receptor	1.7e-88	892	27.578	Q09630
dd_Smed_v6_10160_0_1	NA	SLC39A1	Zinc transporter ZIP1	1194	10.9602	3.87037	2.73e-62	10.5503	3.87037	6.67e-58	1992.32	1499.56	1.3286	darkblue	Contig2670	2.29772	8.1621	3.4e-05	NA	30	Intestine	NA	NA	NA	Q9NY26	SLC39A1	Zinc transporter ZIP1	1.21e-36	274	32.482	Q9QZ03	Slc39a1	Zinc transporter ZIP1	3.55e-36	274	32.847	P59889	slc39a1	Zinc transporter ZIP1	3.5e-33	291	29.553	A1Z6P0	Zip42C.2	Zinc/iron regulated transporter-related protein 42C.2	2.12e-27	294	30.952	O62192
dd_Smed_v6_10167_0_1	NA	STXBP2	Syntaxin-binding protein 2	2005	1.27288	4.07807	0.00218316	1.86112	4.07807	5.2e-06	2.41644	3.6329	0.665155	orange	Contig4564	-0.140489	6.34882	0.496675	NA	9,18,19,20,21,33	Neural,Intestine	2,5	NA	NA	Q15833	STXBP2	Syntaxin-binding protein 2	6.41e-103	641	31.825	Q64324	Stxbp2	Syntaxin-binding protein 2	1.83e-102	642	31.464	A0A0R4IQM9	stxbp1a	Syntaxin-binding protein 1a	5.66e-94	653	30.934	Q07327	Rop	Protein ROP	5.24e-102	620	33.065	P34815
dd_Smed_v6_10170_0_1	NA	NA	NA	1748	2.82606	4.17184	3.83e-15	2.6461	4.17184	1.75e-13	7.09134	6.25973	1.13285	darkblue	NA	NA	NA	NA	NA	6,10,31	Intestine,Cathepsin+ cell	0	NA	NA	NA	NA	NA	NA	NA	NA	NA	NA	NA	NA	NA	NA	E7EYG1	obscnb	Obscurin, cytoskeletal calmodulin and titin-interacting RhoGEF b	0.000443	223	26.009	NA	NA	NA	NA	NA	NA	G5EEU2
dd_Smed_v6_10182_0_1	NA	PGAP2	Post-GPI attachment to proteins factor 2	1006	1.89942	2.98133	0.00497426	2.15291	2.98133	0.0015123	3.73063	4.44725	0.838862	dodgerblue	Contig4671	0.0709514	7.95	0.641983	NA	8,9,19	Neural,Intestine	NA	NA	NA	Q9UHJ9	PGAP2	Post-GPI attachment to proteins factor 2	8.15e-31	156	38.462	Q3TQR0	Pgap2	Post-GPI attachment to proteins factor 2	4.31e-32	156	40.385	Q5BL33	pgap2	Post-GPI attachment to proteins factor 2	1.49e-26	171	33.333	Q9VWK6	CG7990	Post-GPI attachment to proteins factor 2-like	6.15e-39	144	46.528	Q22141
dd_Smed_v6_1019_0_1	NA	SYNJ1	Synaptojanin-1	1373	1.58993	7.24766	7.06e-07	0.838511	7.24766	0.0149782	3.01035	1.7882	1.68345	green	Contig4519	-0.233035	9.46069	0.132048	NA	17	Cathepsin+ cell	NA	NA	NA	O43426	SYNJ1	Synaptojanin-1	1.34e-05	324	22.84	Q9D2G5	Synj2	Synaptojanin-2	2.69e-06	318	23.899	Q5XUX5	synj1	Synaptojanin 1	1.27e-05	314	22.293	Q5U0V7	Synj	GH06496p	0.000436	272	21.691	G5ECL2
dd_Smed_v6_1020_0_1	NA	PHKG1	Phosphorylase b kinase gamma catalytic chain, skeletal muscle/heart isoform	1786	1.90464	7.84876	9.95e-11	1.76752	7.84876	2.36e-09	3.74414	3.40469	1.0997	darkblue	Contig6368	0.222103	6.54409	0.124817	NA	30	Intestine	4	NA	NA	Q16816	PHKG1	Phosphorylase b kinase gamma catalytic chain, skeletal muscle/heart isoform	1.97e-127	367	53.134	Q9DB30	Phkg2	Phosphorylase b kinase gamma catalytic chain, liver/testis isoform	1.36e-125	366	51.093	A0JME5	phkg1a	Phosphorylase kinase, gamma 1a (muscle)	1.59e-125	368	51.902	X2JEJ4	PhKgamma	Phosphorylase kinase gamma, isoform F	1.21e-137	374	54.813	Q9N3L4
dd_Smed_v6_1022_0_1	NA	NA	NA	736	6.99577	8.48647	1.19e-62	6.71158	8.48647	4.39e-59	127.625	104.806	1.21773	darkblue	Contig6766	3.28115	11.1433	0.000845777	NA	6,30	Intestine	4,7	phagocytes	NA	NA	NA	NA	NA	NA	NA	NA	NA	NA	NA	NA	NA	NA	NA	NA	NA	NA	NA	NA	NA	NA	NA	NA	NA	NA
dd_Smed_v6_10226_0_1	NA	NAT8B	Putative N-acetyltransferase 8B	899	3.3089	2.38586	9.27e-05	4.14369	2.38586	1.82e-06	9.91011	17.6756	0.560665	orange	NA	NA	NA	NA	NA	NA	NA	NA	NA	NA	Q9UHF3	NAT8B	Putative N-acetyltransferase 8B	5.41e-06	66	36.364	NA	NA	NA	NA	NA	NA	NA	NA	NA	NA	NA	NA	Q9VLU3	CG12560	IP09231p	6.22e-09	119	25.21	NA
dd_Smed_v6_10241_0_1	CIB2	CIB2	Calcium and integrin-binding family member 2	785	4.16658	3.94592	3.66e-15	4.02078	3.94592	2.77e-14	17.9583	16.2321	1.10634	darkblue	NA	NA	NA	NA	no_signal	NA	NA	NA	NA	NA	O75838	CIB2	Calcium and integrin-binding family member 2	2.09e-27	193	33.161	Q9Z309	Cib2	Calcium and integrin-binding family member 2	8.89e-27	193	32.642	Q6PC72	cib2	Calcium and integrin binding family member 2	3.51e-25	199	33.668	Q9W2Q5	Cib2	CIB2 ortholog	2.3e-25	193	32.124	H9G2Y1
dd_Smed_v6_10243_0_1	NA	NA	NA	1878	1.62608	3.22872	0.000926959	1.20317	3.22872	0.0200331	3.08672	2.30245	1.34063	darkblue	NA	NA	NA	NA	NA	NA	NA	NA	NA	NA	NA	NA	NA	NA	NA	NA	NA	NA	NA	NA	NA	NA	NA	NA	NA	NA	NA	NA	NA	NA	NA	NA	NA	NA	NA
dd_Smed_v6_10257_0_1	NA	TCAF2	TRPM8 channel-associated factor 2	3307	4.42361	3.36076	1.29e-21	4.33679	3.36076	6.88e-21	21.4605	20.2072	1.06202	darkblue	NA	NA	NA	NA	NA	NA	NA	NA	NA	NA	A6NFQ2	TCAF2	TRPM8 channel-associated factor 2	3.35e-29	381	24.934	Q6QR59	Tcaf3	TRPM8 channel-associated factor 3	1.54e-32	382	27.225	Q7SXB3	pik3ip1	Phosphoinositide-3-kinase-interacting protein 1	1.81e-08	79	37.975	Q24488	Ror	Tyrosine-protein kinase transmembrane receptor Ror	1.15e-05	78	34.615	G5EGK5
dd_Smed_v6_1026_0_1	NA	ACSBG2	Long-chain-fatty-acid--CoA ligase ACSBG2	2160	1.24476	7.83478	0.000324098	1.03221	7.83478	0.00391336	2.36979	2.04516	1.15873	darkblue	Contig4874	-0.121091	8.44206	0.584169	NA	2,3,11,24,25,30,35	Epidermal,Pharynx,Intestine	4,7	NA	Early_epithelial_progeny	Q5FVE4	ACSBG2	Long-chain-fatty-acid--CoA ligase ACSBG2	5.94e-180	626	44.728	Q2XU92	Acsbg2	Long-chain-fatty-acid--CoA ligase ACSBG2	2.17e-180	626	43.61	F1QDA6	acsl1b	Acyl-CoA synthetase long-chain family member 1b	2.03e-47	638	26.176	Q9V3S9	bgm	Very long-chain-fatty-acid--CoA ligase bubblegum	5.06e-176	628	44.427	Q20121
dd_Smed_v6_10262_0_1	NA	TMEM56	Transmembrane protein 56	1151	4.76952	1.87986	3.8e-09	4.52548	1.87986	2.19e-08	27.2753	23.0307	1.1843	darkblue	NA	NA	NA	NA	NA	NA	NA	NA	NA	NA	Q96MV1	TMEM56	Transmembrane protein 56	2.34e-20	215	26.047	Q8CGF5	Tmem56	Transmembrane protein 56	1.17e-21	226	27.434	Q5XIY2	tmem56b	Transmembrane protein 56-B	2.34e-30	250	30.8	NA	NA	NA	NA	NA	NA	NA
dd_Smed_v6_10288_0_1	NA	PLEKHG6	Pleckstrin homology domain-containing family G member 6	1921	5.39571	3.44014	4.18e-22	5.96048	3.44014	9.92e-26	42.0987	62.2707	0.67606	dodgerblue	NA	NA	NA	NA	NA	30	Intestine	4	NA	NA	Q3KR16	PLEKHG6	Pleckstrin homology domain-containing family G member 6	2.83e-39	377	27.056	Q8R0J1	Plekhg6	Pleckstrin homology domain-containing family G member 6	2.75e-40	377	29.178	A0A0R4ISX1	plekhg5a	Pleckstrin homology domain-containing, family G (with RhoGef domain) member 5a	1.36e-29	342	25.731	M9PG56	Dmel\CG42674	Uncharacterized protein, isoform G	5.68e-37	375	28	Q22354
dd_Smed_v6_1029_1_1	NA	NA	NA	2347	5.87052	8.19521	2.88e-56	5.80343	8.19521	2.79e-55	58.5064	55.8477	1.04761	darkblue	Contig6700	3.44383	9.19239	0.00064886	NA	30	Intestine	4	NA	Gut	NA	NA	NA	NA	NA	NA	NA	NA	NA	NA	NA	NA	NA	NA	NA	NA	NA	NA	NA	NA	NA	NA	NA	NA	NA
dd_Smed_v6_10310_0_1	NA	PISD	Phosphatidylserine decarboxylase proenzyme, mitochondrial	1771	2.13767	4.50861	2.14e-11	1.72419	4.50861	8.3e-08	4.4005	3.30393	1.3319	darkblue	NA	NA	NA	NA	NA	NA	NA	NA	NA	NA	Q9UG56	PISD	Phosphatidylserine decarboxylase proenzyme, mitochondrial	2.07e-86	363	41.047	Q8BSF4	Pisd	Phosphatidylserine decarboxylase proenzyme, mitochondrial	7.73e-86	363	41.873	NA	NA	NA	NA	NA	NA	NA	NA	NA	NA	NA	NA	NA
dd_Smed_v6_10355_0_1	NA	GSTO1	Glutathione S-transferase omega-1	1097	1.42681	5.0729	0.00015955	1.16202	5.0729	0.00288939	2.68851	2.23771	1.20146	darkblue	NA	NA	NA	NA	NA	NA	NA	NA	NA	NA	P78417	GSTO1	Glutathione S-transferase omega-1	2.31e-18	215	27.907	O09131	Gsto1	Glutathione S-transferase omega-1	6.71e-19	237	25.738	F1QN72	gsto1	Glutathione S-transferase omega 1	4.06e-23	232	29.741	Q9VSL4	GstO2	Glutathione S transferase O2, isoform B	3.52e-25	234	27.35	P34345
dd_Smed_v6_10356_0_1	NA	NA	NA	1706	2.43281	3.92746	1.39e-08	1.89375	3.92746	1.19e-05	5.39943	3.71599	1.45302	darkblue	Contig2151	1.59492	7.75597	0.00164821	NA	1,7,8,9,13,14,16,18,20,21,32,34,36	Neural,Muscle	NA	NA	NA	NA	NA	NA	NA	NA	NA	NA	NA	NA	NA	NA	NA	NA	NA	NA	NA	NA	NA	NA	NA	NA	NA	NA	NA	NA
dd_Smed_v6_10359_0_1	NA	NA	NA	1517	3.58527	4.04682	1.83e-23	3.92093	4.04682	3.07e-27	12.0026	15.1466	0.792424	dodgerblue	Contig1076	0.930377	7.01859	0.00295655	NA	6,17,19,25,27,37,43	Intestine,Cathepsin+ cell,Pharynx	2,7	NA	NA	NA	NA	NA	NA	NA	NA	NA	NA	NA	NA	NA	NA	NA	NA	NA	NA	NA	NA	NA	NA	NA	NA	NA	NA	NA
dd_Smed_v6_10364_0_1	NA	CBR4	Carbonyl reductase family member 4	900	6.03157	3.16969	1.02e-10	5.33931	3.16969	5.63e-09	65.416	40.4848	1.61582	green	NA	NA	NA	NA	NA	NA	NA	NA	NA	NA	Q8N4T8	CBR4	Carbonyl reductase family member 4	3.11e-21	232	25.431	Q3U0B3	Dhrs11	Dehydrogenase/reductase SDR family member 11	1.91e-73	254	44.488	F1R5X7	dhrs11b	Dehydrogenase/reductase (SDR family) member 11b	2.51e-85	253	48.221	Q9VZ19	antdh	Antdh	1.62e-49	256	32.031	Q21929
dd_Smed_v6_1037_0_1	NA	RAB32	Ras-related protein Rab-32	1077	2.64599	7.00811	2.2e-20	2.4488	7.00811	9.3e-18	6.25925	5.45963	1.14646	darkblue	Contig5808	2.48048	10.2417	3.27e-05	NA	10,17,28,30,31,39,41	Cathepsin+ cell,Intestine	4,7	phagocytes,pigment	Gut	Q13637	RAB32	Ras-related protein Rab-32	9.2e-87	207	62.802	Q9CZE3	Rab32	Ras-related protein Rab-32	8.96e-87	207	63.285	Q6NYQ4	rab32a	RAB32a, member RAS oncogene family	1.02e-85	208	64.423	A1Z7S1	Rab32	FI09421p	4.33e-86	208	61.058	G5EBF0
dd_Smed_v6_10374_0_1	sbno2a	SBNO1	Protein strawberry notch homolog 1	3407	4.93731	5.09053	1.98e-34	4.88938	5.09053	7.04e-34	30.6393	29.6381	1.03378	darkblue	NA	NA	NA	NA	uniform	30	Intestine	4	NA	NA	A3KN83	SBNO1	Protein strawberry notch homolog 1	3.66e-143	448	51.116	Q689Z5	Sbno1	Protein strawberry notch homolog 1	2.67e-143	448	51.339	D6RUV4	sbno2a	Strawberry notch homologue 2a	0	1032	41.957	A8JUV0	sno	Protein strawberry notch	8.06e-145	463	50.972	O01737
dd_Smed_v6_10382_0_1	NA	NA	NA	1820	1.68832	3.65387	7.24e-06	1.4789	3.65387	0.000106426	3.22281	2.78737	1.15622	darkblue	NA	NA	NA	NA	NA	NA	NA	NA	NA	NA	NA	NA	NA	NA	NA	NA	NA	NA	NA	NA	NA	NA	NA	NA	NA	NA	NA	NA	NA	NA	NA	NA	NA	NA	NA
dd_Smed_v6_10395_0_1	NA	NA	NA	947	4.73523	3.90861	5.32e-28	4.51714	3.90861	6.01e-26	26.6345	22.8979	1.16319	darkblue	NA	NA	NA	NA	NA	13,14,30	Muscle,Intestine	4	NA	NA	NA	NA	NA	NA	NA	NA	NA	NA	NA	NA	NA	NA	NA	NA	NA	NA	NA	NA	NA	NA	NA	NA	NA	NA	NA
dd_Smed_v6_10397_0_1	NA	PAQR3	Progestin and adipoQ receptor family member 3	1041	1.62781	4.87701	3.24e-07	1.29147	4.87701	6.99e-05	3.09045	2.44777	1.26256	darkblue	Contig6707	0.530233	7.09574	0.118336	NA	NA	NA	NA	NA	NA	Q6TCH7	PAQR3	Progestin and adipoQ receptor family member 3	2.97e-76	276	43.841	Q6TCG8	Paqr3	Progestin and adipoQ receptor family member 3	1.04e-77	276	44.928	Q4V9P1	paqr3b	Progestin and adipoQ receptor family member IIIb	2.41e-85	277	44.765	Q9VFG7	CG7530	CG7530, isoform A	1.71e-58	294	35.034	Q9U1V1
dd_Smed_v6_10413_0_1	NA	NA	NA	563	8.45407	2.25113	4.62e-20	8.41298	2.25113	7.34e-20	350.695	340.848	1.02889	darkblue	NA	NA	NA	NA	NA	NA	NA	NA	NA	NA	NA	NA	NA	NA	NA	NA	NA	NA	NA	NA	NA	NA	NA	NA	NA	NA	NA	NA	NA	NA	NA	NA	NA	NA	NA
dd_Smed_v6_1045_0_1	NA	EEF1B2	Elongation factor 1-beta	547	1.04516	6.49642	0.0168328	1.14304	6.49642	0.00933379	2.0636	2.20846	0.934406	dodgerblue	Contig4222	0.127195	8.29864	0.476044	NA	NA	NA	NA	NA	NA	P24534	EEF1B2	Elongation factor 1-beta	4.97e-33	69	79.71	O70251	Eef1b	Elongation factor 1-beta	3.43e-32	69	78.261	NA	NA	NA	NA	NA	NA	O96827	Ef1beta	Probable elongation factor 1-beta	3.67e-30	69	73.913	NA
dd_Smed_v6_10474_0_1	NA	WDR59	GATOR complex protein WDR59	3553	1.14931	5.10805	0.000508319	0.746372	5.10805	0.0364229	2.21808	1.67757	1.3222	darkblue	NA	NA	NA	NA	NA	15,16	Cathepsin+ cell,Muscle	NA	NA	NA	Q6PJI9	WDR59	GATOR complex protein WDR59	1.47e-21	498	22.49	Q8C0M0	Wdr59	GATOR complex protein WDR59	7.39e-19	516	22.093	Q7ZTY4	rbbp7	Histone-binding protein RBBP7	4.87e-05	48	33.333	Q9VKK2	CG4705	GATOR complex protein WDR59	2.64e-05	224	22.321	P90916
dd_Smed_v6_1048_0_1	NA	SLC37A2	Glucose-6-phosphate exchanger SLC37A2	1857	1.69898	5.40334	3.93e-09	1.3481	5.40334	4.23e-06	3.24671	2.54577	1.27534	darkblue	Contig1560	0.767019	7.72962	0.00252561	NA	10,17,30	Cathepsin+ cell,Intestine	4	NA	NA	Q8TED4	SLC37A2	Glucose-6-phosphate exchanger SLC37A2	6.03e-121	415	50.361	Q9WU81	Slc37a2	Glucose-6-phosphate exchanger SLC37A2	8.97e-122	419	50.835	Q7SY29	slc37a2	Glucose-6-phosphate exchanger SLC37A2	3.84e-126	414	53.14	NA	NA	NA	NA	NA	NA	H2FLL8
dd_Smed_v6_10485_0_1	NA	TRPM2	Transient receptor potential cation channel subfamily M member 2	3045	4.93553	5.15667	3.55e-47	5.16413	5.15667	1.46e-50	30.6015	35.8558	0.85346	dodgerblue	NA	NA	NA	NA	NA	30	Intestine	4	NA	NA	O94759	TRPM2	Transient receptor potential cation channel subfamily M member 2	5.69e-16	486	25.309	Q91YD4	Trpm2	Transient receptor potential cation channel subfamily M member 2	1.72e-15	372	23.387	S5TRY1	trpm4a	Transient receptor potential melastatin 4a	3.33e-12	265	29.434	A8DYE2	Trpm	Transient receptor potential cation channel trpm	3.94e-08	285	27.368	Q20766
dd_Smed_v6_10493_0_1	NA	NA	NA	4619	1.60337	4.95737	1.02e-07	1.22625	4.95737	6.66e-05	3.03852	2.33958	1.29874	darkblue	NA	NA	NA	NA	NA	20,23,24,33	Neural,Epidermal	NA	NA	NA	NA	NA	NA	NA	NA	NA	NA	NA	NA	NA	NA	NA	NA	NA	NA	NA	NA	NA	NA	NA	NA	NA	NA	NA	NA
dd_Smed_v6_10499_0_1	NA	EGFR	Receptor protein-tyrosine kinase	4089	3.71627	3.29748	1.07e-11	3.98111	3.29748	5.67e-13	13.1434	15.7919	0.832288	dodgerblue	NA	NA	NA	NA	NA	30	Intestine	NA	spp-11+ neurons	NA	Q504U8	EGFR	Receptor protein-tyrosine kinase	1.55e-67	489	33.742	Q01279	Egfr	Epidermal growth factor receptor	2.03e-70	491	34.012	B3DK54	egfra	Receptor protein-tyrosine kinase	3.29e-66	487	33.881	P04412	Egfr	Epidermal growth factor receptor	5.61e-130	1156	28.633	P24348
dd_Smed_v6_1050_0_1	NA	RAC2	Ras-related C3 botulinum toxin substrate 2	1134	1.238	6.63087	1.22e-05	0.945424	6.63087	0.0012164	2.35872	1.92575	1.22483	darkblue	Contig5264	0.730085	7.86825	0.0174341	NA	8,10,17,20,21,28,30,33	Neural,Cathepsin+ cell,Intestine	4	NA	NA	P15153	RAC2	Ras-related C3 botulinum toxin substrate 2	1.1e-108	192	79.167	P63001	Rac1	Ras-related C3 botulinum toxin substrate 1	1.95e-108	192	79.688	Q6IQN5	rac2	Ras-related C3 botulinum toxin substrate 2 (Rho family, small GTP binding protein Rac2)	2.19e-107	192	79.167	P40792	Rac1	Ras-related protein Rac1	2.37e-109	192	79.167	Q03206
dd_Smed_v6_10529_0_1	NA	ELOVL4	Elongation of very long chain fatty acids protein 4	968	2.69146	3.28969	3.54e-11	2.48201	3.28969	1.11e-09	6.45965	5.58676	1.15624	darkblue	NA	NA	NA	NA	NA	27	Pharynx	NA	NA	NA	Q9GZR5	ELOVL4	Elongation of very long chain fatty acids protein 4	1.9e-64	243	41.975	Q9EQC4	Elovl4	Elongation of very long chain fatty acids protein 4	3.62e-63	257	39.689	B8JJK4	elovl8b	Elongation of very long chain fatty acids protein	1.99e-66	238	45.798	Q8IPL8	CG9798	Elongation of very long chain fatty acids protein	3.4e-70	254	45.276	Q03574
dd_Smed_v6_1053_0_1	NA	NA	NA	1506	2.55581	6.56911	2.75e-20	1.98223	6.56911	6.34e-13	5.87997	3.95104	1.48821	darkblue	Contig1731	2.11179	8.64176	0.000204553	NA	10,17,30,39	Cathepsin+ cell,Intestine	4	NA	Cathepsin+ b	NA	NA	NA	NA	NA	NA	Q8BX37	Acp7	Acid phosphatase type 7	6.67e-147	439	50.342	NA	NA	NA	NA	NA	NA	Q9VZ56	CG1637	Purple acid phosphatase	9.89e-155	431	51.972	NA
dd_Smed_v6_10582_0_1	NA	RIN2	Ras and Rab interactor 2	1622	1.68296	3.14521	0.000386587	1.3728	3.14521	0.00507713	3.21085	2.58972	1.23984	darkblue	NA	NA	NA	NA	NA	17,41	Cathepsin+ cell	NA	NA	NA	Q8WYP3	RIN2	Ras and Rab interactor 2	5.64e-07	139	25.899	Q9D684	Rin2	Ras and Rab interactor 2	3.65e-07	139	26.619	A1L2C2	vps9d1	Zgc:158780	2.34e-07	96	36.458	Q8MQW8	spri	Protein sprint	0.000295	97	27.835	Q8I100
dd_Smed_v6_10591_0_1	NA	LOXL2	Lysyl oxidase homolog 2	1551	6.42404	4.07223	6.04e-33	6.58354	4.07223	3.75e-34	85.8675	95.9055	0.895335	dodgerblue	NA	NA	NA	NA	NA	30	Intestine	NA	NA	NA	Q9Y4K0	LOXL2	Lysyl oxidase homolog 2	3.12e-69	446	31.839	P58022	Loxl2	Lysyl oxidase homolog 2	6.4e-71	447	33.557	F1QQC3	loxl2a	Lysyl oxidase homolog 2A	8.43e-74	446	34.305	Q9N9Y8	lox2	Lysyl oxidase-like 2	1.08e-96	469	36.034	NA
dd_Smed_v6_10595_0_1	NA	SLC47A2	Multidrug and toxin extrusion protein 2	1833	6.07877	3.64579	1.75e-15	6.39265	3.64579	1.44e-16	67.5916	84.0194	0.804476	dodgerblue	NA	NA	NA	NA	NA	30	Intestine	4	NA	NA	Q86VL8	SLC47A2	Multidrug and toxin extrusion protein 2	6e-55	585	27.009	Q8K0H1	Slc47a1	Multidrug and toxin extrusion protein 1	1.54e-56	492	28.049	A1L1P9	slc47a1	Multidrug and toxin extrusion protein 1	1.23e-58	457	30.197	NA	NA	NA	NA	NA	NA	NA
dd_Smed_v6_1060_0_1	NA	ALDH18A1	Delta-1-pyrroline-5-carboxylate synthase	2412	1.08463	7.23322	0.000234215	1.10761	7.23322	0.000193427	2.12084	2.15488	0.984202	dodgerblue	Contig6799	-1.23018	9.11656	0.00203392	NA	12,19	Parapharyngeal,Intestine	2,3,5	NA	NA	P54886	ALDH18A1	Delta-1-pyrroline-5-carboxylate synthase	0	734	56.676	Q9Z110	Aldh18a1	Delta-1-pyrroline-5-carboxylate synthase	0	762	54.856	NA	NA	NA	NA	NA	NA	Q9VNW6	Dmel\CG7470	CG7470, isoform A	0	729	56.104	P54889
dd_Smed_v6_10607_0_1	NA	NA	NA	1087	5.07545	4.23152	3.14e-23	4.63392	4.23152	3.88e-20	33.7181	24.8284	1.35805	darkblue	NA	NA	NA	NA	NA	30	Intestine	4,7	NA	NA	NA	NA	NA	NA	NA	NA	NA	NA	NA	NA	NA	NA	NA	NA	NA	NA	NA	NA	NA	NA	NA	NA	NA	NA	NA
dd_Smed_v6_1062_0_1	gaa	GAA	Lysosomal alpha-glucosidase	2873	6.10067	8.36569	3.41e-68	5.64032	8.36569	5.34e-61	68.6255	49.8777	1.37588	darkblue	NA	NA	NA	NA	uniform subset	19,30	Intestine	4,8	NA	Gut	P10253	GAA	Lysosomal alpha-glucosidase	0	847	42.503	P70699	Gaa	Lysosomal alpha-glucosidase	0	865	42.312	B3DIZ3	zgc:171967	Zgc:171967	1.05e-78	842	28.741	Q7KMM4	GCS2alpha	BcDNA.GH04962	8.3e-82	632	30.38	Q19004
dd_Smed_v6_1065_0_1	NA	CLINT1	Clathrin interactor 1	2125	1.59019	5.20335	1.16e-06	1.63203	5.20335	6.83e-07	3.01089	3.0995	0.971414	dodgerblue	Contig5397	0.500896	8.76983	0.00534265	NA	7,14,17,24,29,30	Muscle,Cathepsin+ cell,Epidermal,Protonephridia,Intestine	4,7	NA	NA	Q14677	CLINT1	Clathrin interactor 1	4.38e-51	164	60.366	Q99KN9	Clint1	Clathrin interactor 1	7.92e-48	157	60.51	Q5U3J4	clint1a	Clathrin interactor 1	2.19e-55	164	60.976	Q9VD13	lqfR	GH02671p	8.04e-54	164	63.415	Q9BI71
dd_Smed_v6_10656_0_1	NA	SLC16A9	Monocarboxylate transporter 9	1377	3.97235	4.52991	8.38e-23	3.80588	4.52991	3.27e-21	15.6963	13.9857	1.12231	darkblue	Contig2353	1.85825	7.61356	0.000143555	NA	NA	NA	4	NA	NA	Q7RTY1	SLC16A9	Monocarboxylate transporter 9	0.000538	104	26.923	Q7TM99	Slc16a9	Monocarboxylate transporter 9	0.00065	90	27.778	F1QFN0	slc16a9a	Solute carrier family 16, member 9a	3.87e-06	75	29.333	NA	NA	NA	NA	NA	NA	NA
dd_Smed_v6_10661_0_1	NA	NA	NA	4073	1.25923	4.51735	6.64e-05	0.702282	4.51735	0.042531	2.39367	1.62708	1.47115	darkblue	NA	NA	NA	NA	NA	24	Epidermal	NA	NA	NA	NA	NA	NA	NA	NA	NA	NA	NA	NA	NA	NA	NA	NA	NA	NA	NA	NA	NA	NA	NA	NA	NA	NA	NA	NA
dd_Smed_v6_10667_0_1	NA	PPAT	Amidophosphoribosyltransferase	1813	1.05299	3.61906	0.00886555	1.6776	3.61906	1.57e-05	2.07483	3.19896	0.648596	orange	NA	NA	NA	NA	NA	NA	NA	NA	NA	NA	Q06203	PPAT	Amidophosphoribosyltransferase	0	522	56.513	P47856	Gfpt1	Glutamine--fructose-6-phosphate aminotransferase [isomerizing] 1	4.54e-10	191	25.131	Q5RG54	ppat	Amidophosphoribosyltransferase	0	509	58.35	Q27601	Prat	Amidophosphoribosyltransferase	0	500	56.2	Q19130
dd_Smed_v6_1067_0_1	atp6ap2	ATP6AP2	Renin receptor	536	2.53239	6.33974	8.83e-19	2.21787	6.33974	7.71e-15	5.7853	4.65206	1.2436	darkblue	Contig6838	2.22917	9.36782	0.000749314	uniform	8,9,17,21,28,29,30	Neural,Cathepsin+ cell,Protonephridia,Intestine	4	NA	NA	O75787	ATP6AP2	Renin receptor	3.3e-12	71	42.254	Q9CYN9	Atp6ap2	Renin receptor	2.66e-11	52	48.077	F8W5R3	atp6ap2	ATPase, H+-transporting, lysosomal accessory protein 2	2.24e-14	60	48.333	Q9VHG4	VhaM8.9	LD30634p	7.71e-14	52	57.692	Q9XTY9
dd_Smed_v6_1068_0_1	NA	NA	NA	665	6.01543	8.76091	2.68e-49	6.25271	8.76091	5.26e-52	64.6882	76.2524	0.848343	dodgerblue	Contig6709	2.27694	9.41739	0.000923161	NA	30	Intestine	4,7	NA	NA	NA	NA	NA	NA	NA	NA	NA	NA	NA	NA	NA	NA	NA	NA	NA	NA	NA	NA	NA	NA	NA	NA	NA	NA	NA
dd_Smed_v6_10699_0_1	NA	PEX3	Peroxisomal biogenesis factor 3	1199	1.28365	4.36783	9.86e-05	0.707059	4.36783	0.0517814	2.43455	1.63247	1.49132	darkblue	Contig3365	0.290391	6.95856	0.0468835	NA	NA	NA	NA	NA	NA	P56589	PEX3	Peroxisomal biogenesis factor 3	1.09e-05	273	19.78	NA	NA	NA	NA	NA	NA	NA	NA	NA	NA	NA	NA	NA	NA	NA	NA	NA	NA	NA
dd_Smed_v6_10724_0_1	NA	MFSD8	Major facilitator superfamily domain-containing protein 8	1735	3.05142	3.72768	1.05e-11	3.63999	3.72768	1.48e-15	8.29027	12.4666	0.665001	orange	NA	NA	NA	NA	NA	NA	NA	NA	NA	NA	Q8NHS3	MFSD8	Major facilitator superfamily domain-containing protein 8	6.46e-63	468	32.265	Q8BH31	Mfsd8	Major facilitator superfamily domain-containing protein 8	6.31e-60	474	31.224	NA	NA	NA	NA	NA	NA	NA	NA	NA	NA	NA	NA	NA
dd_Smed_v6_10744_0_1	NA	PM20D2	Peptidase M20 domain-containing protein 2	1430	3.32286	4.70666	1.48e-17	3.00139	4.70666	9.11e-15	10.0064	8.00771	1.2496	darkblue	PL05004A1H06	0.43033	7.15893	0.0520456	NA	NA	NA	NA	NA	NA	Q8IYS1	PM20D2	Peptidase M20 domain-containing protein 2	6.31e-91	387	40.568	A3KG59	Pm20d2	Peptidase M20 domain-containing protein 2	2.38e-87	394	41.371	NA	NA	NA	NA	NA	NA	NA	NA	NA	NA	NA	NA	NA
dd_Smed_v6_10758_0_1	NA	WDR41	WD repeat-containing protein 41	1482	4.17771	3.19896	4.86e-10	4.47079	3.19896	4.81e-11	18.0974	22.1738	0.816159	dodgerblue	PL06013A1B06	0.775963	7.00935	0.0250546	NA	NA	NA	NA	NA	NA	Q9HAD4	WDR41	WD repeat-containing protein 41	5.73e-09	416	20.192	Q3UDP0	Wdr41	WD repeat-containing protein 41	3.35e-07	412	21.602	NA	NA	NA	NA	NA	NA	NA	NA	NA	NA	NA	NA	NA
dd_Smed_v6_1079_0_1	NA	TMEM55A	Type 2 phosphatidylinositol 4,5-bisphosphate 4-phosphatase	944	2.10158	6.10495	1.22e-07	1.99546	6.10495	5.99e-07	4.29179	3.98743	1.07633	darkblue	Contig1068	2.08828	9.93372	0.000486662	NA	10,17,30	Cathepsin+ cell,Intestine	4	NA	Cathepsin+ b	Q8N4L2	TMEM55A	Type 2 phosphatidylinositol 4,5-bisphosphate 4-phosphatase	4.02e-36	208	41.346	Q9CZX7	Tmem55a	Type 2 phosphatidylinositol 4,5-bisphosphate 4-phosphatase	9.55e-36	208	40.865	NA	NA	NA	NA	NA	NA	Q9VT68	Dmel\CG6707	CG6707, isoform B	1.8e-38	220	40	NA
dd_Smed_v6_10829_0_1	NA	NA	NA	1489	1.74814	3.29499	0.000186445	1.21974	3.29499	0.0132978	3.35926	2.32905	1.44233	darkblue	NA	NA	NA	NA	NA	10	Cathepsin+ cell	7	NA	NA	NA	NA	NA	NA	NA	NA	NA	NA	NA	NA	NA	NA	NA	NA	NA	NA	NA	NA	NA	NA	NA	NA	NA	NA	Q9GRY3
dd_Smed_v6_10855_0_1	NA	NA	NA	1569	3.60243	3.92235	1.35e-07	3.35557	3.92235	9.13e-07	12.1462	10.2359	1.18662	darkblue	PL06023A2H08	0.474219	6.73724	0.0594049	NA	30	Intestine	4	NA	NA	NA	NA	NA	NA	NA	NA	NA	NA	NA	NA	NA	NA	NA	NA	NA	NA	NA	NA	NA	NA	NA	NA	NA	NA	NA
dd_Smed_v6_10866_0_1	NA	KYNU	Kynureninase	1514	2.59501	3.40329	1.87e-07	2.66678	3.40329	1e-07	6.04195	6.35012	0.951471	dodgerblue	NA	NA	NA	NA	NA	28	Cathepsin+ cell	NA	NA	NA	Q16719	KYNU	Kynureninase	3.4e-128	460	44.783	Q9CXF0	Kynu	Kynureninase	1.04e-134	460	46.304	NA	NA	NA	NA	NA	NA	NA	NA	NA	NA	NA	NA	Q18026
dd_Smed_v6_1088_0_1	NA	TGFBI	Transforming growth factor-beta-induced protein ig-h3	2665	5.78955	7.29847	5.2e-57	5.73917	7.29847	3.24e-56	55.3132	53.4147	1.03554	darkblue	PL06010A1C04	0.058081	6.63381	0.687523	NA	6,30	Intestine	4,7	phagocytes	Gut	Q15582	TGFBI	Transforming growth factor-beta-induced protein ig-h3	1.65e-22	428	23.832	P82198	Tgfbi	Transforming growth factor-beta-induced protein ig-h3	4.93e-21	426	23.709	E7F5I3	postna	Periostin, osteoblast-specific factor a	2.1e-21	620	23.226	O61457	mfas	Midline fasciclin	7.65e-05	221	22.172	NA
dd_Smed_v6_1090_0_1	NA	NA	NA	410	1.75916	7.89365	3.48e-11	1.83332	7.89365	5.96e-12	3.38501	3.56356	0.949896	dodgerblue	NA	NA	NA	NA	NA	10,17,28,30,41	Cathepsin+ cell,Intestine	4	NA	NA	NA	NA	NA	NA	NA	NA	P63078	Gng8	Guanine nucleotide-binding protein G(I)/G(S)/G(O) subunit gamma-8	0.000626	65	30.769	NA	NA	NA	NA	NA	NA	NA	NA	NA	NA	NA	NA	NA
dd_Smed_v6_10910_0_1	NA	NA	NA	1832	6.99224	4.20544	7.5e-26	6.84099	4.20544	5.09e-25	127.314	114.642	1.11054	darkblue	Contig7029	1.82294	7.76277	0.000854245	NA	30	Intestine	4	NA	NA	NA	NA	NA	NA	NA	NA	NA	NA	NA	NA	NA	NA	NA	NA	NA	NA	NA	NA	NA	NA	NA	NA	NA	NA	NA
dd_Smed_v6_10915_0_1	NA	NA	NA	1655	4.25062	3.81098	8.92e-15	4.17832	3.81098	2.51e-14	19.0355	18.105	1.05139	darkblue	Contig2562	0.70817	6.15987	0.00675023	NA	NA	NA	NA	NA	NA	NA	NA	NA	NA	NA	NA	NA	NA	NA	NA	NA	NA	NA	NA	NA	NA	NA	NA	NA	NA	NA	NA	NA	NA	NA
dd_Smed_v6_10917_0_1	NA	TRAF6	TNF receptor-associated factor 6	1458	4.22413	4.54734	6.39e-19	3.9597	4.54734	4.87e-17	18.6892	15.5593	1.20116	darkblue	NA	NA	NA	NA	NA	30	Intestine	4	NA	NA	Q9Y4K3	TRAF6	TNF receptor-associated factor 6	3.46e-06	163	23.313	P70196	Traf6	TNF receptor-associated factor 6	1.66e-06	110	28.182	Q6IWL4	traf6	TNF receptor-associated factor 6	6.69e-06	97	29.897	Q9UAC4	Traf6	TRAF6	4.8e-05	148	25	NA
dd_Smed_v6_10923_0_1	NA	NA	NA	958	6.16048	3.30536	6.07e-14	5.92916	3.30536	3.79e-13	71.5304	60.9332	1.17391	darkblue	Contig3199	0.549921	6.60506	0.0101627	NA	NA	NA	7	NA	NA	NA	NA	NA	NA	NA	NA	NA	NA	NA	NA	NA	NA	NA	NA	NA	NA	NA	NA	NA	NA	NA	NA	NA	NA	NA
dd_Smed_v6_1093_0_1	NA	SETMAR	Histone-lysine N-methyltransferase SETMAR	761	4.82459	6.76838	8.02e-38	5.11673	6.76838	2.52e-41	28.3365	34.6968	0.816687	dodgerblue	NA	NA	NA	NA	NA	NA	NA	5	NA	NA	Q53H47	SETMAR	Histone-lysine N-methyltransferase SETMAR	1.53e-16	135	32.593	NA	NA	NA	NA	NA	NA	NA	NA	NA	NA	NA	NA	NA	NA	NA	NA	NA	NA	NA
dd_Smed_v6_10959_0_1	NA	NA	NA	1608	3.3479	3.73687	8.91e-15	3.27055	3.73687	3.63e-14	10.1817	9.65017	1.05508	darkblue	NA	NA	NA	NA	NA	10,30	Cathepsin+ cell,Intestine	NA	NA	NA	NA	NA	NA	NA	NA	NA	NA	NA	NA	NA	NA	NA	NA	NA	NA	NA	NA	NA	NA	NA	NA	NA	NA	NA	NA
dd_Smed_v6_10973_0_1	NA	NA	NA	842	7.29001	5.96922	1.82e-23	4.09689	5.96922	3.13e-10	156.499	17.1115	9.14588	darkgreen	NA	NA	NA	NA	NA	NA	NA	NA	NA	NA	NA	NA	NA	NA	NA	NA	NA	NA	NA	NA	NA	NA	NA	NA	NA	NA	NA	NA	Q8T8X4	l(2)k05911	AT19278p	2.96e-05	147	25.85	NA
dd_Smed_v6_10981_0_1	NA	NA	NA	2031	3.49939	1.87502	0.00073309	3.87322	1.87502	0.000234825	11.3089	14.6539	0.771731	dodgerblue	NA	NA	NA	NA	NA	30,32	Intestine,Neural	4	NA	NA	NA	NA	NA	NA	NA	NA	Q61549	Adgre1	Adhesion G protein-coupled receptor E1	8.98e-08	258	22.868	NA	NA	NA	NA	NA	NA	Q9W0R5	mthl10	Probable G-protein coupled receptor Mth-like 10	8.53e-11	258	21.318	NA
dd_Smed_v6_11_0_1	NA	NA	NA	810	3.62688	11.696	9.77e-22	3.52801	11.696	1e-20	12.3537	11.5355	1.07093	darkblue	Contig1963	2.84316	12.3652	2.7e-05	NA	10,15,17,19,30,39,43	Cathepsin+ cell,Intestine	4,5,7	phagocytes,ldlrr-1+ parenchymal cells,psap+ parenchymal cells,goblet cells	Gut	NA	NA	NA	NA	NA	NA	NA	NA	NA	NA	NA	NA	NA	NA	NA	NA	NA	NA	Q8MR08	CG10527	LD46156p	1.9e-23	142	37.324	NA
dd_Smed_v6_11025_0_1	NA	PXMP4	Peroxisomal membrane protein 4	1013	1.0717	3.93911	0.00529554	0.898121	3.93911	0.025202	2.10191	1.86364	1.12786	darkblue	Contig2841	0.101414	7.60902	0.549102	NA	NA	NA	NA	NA	NA	Q9Y6I8	PXMP4	Peroxisomal membrane protein 4	1.27e-30	198	35.859	Q9JJW0	Pxmp4	Peroxisomal membrane protein 4	2.22e-29	198	34.848	NA	NA	NA	NA	NA	NA	NA	NA	NA	NA	NA	NA	NA
dd_Smed_v6_11031_0_1	NA	NA	NA	463	8.02419	-0.187425	9.44e-06	7.9028	-0.187425	1.4e-05	260.328	239.321	1.08778	darkblue	Contig5461	1.0542	7.52556	0.00185518	NA	NA	NA	NA	NA	NA	NA	NA	NA	NA	NA	NA	NA	NA	NA	NA	NA	NA	NA	NA	NA	NA	NA	NA	NA	NA	NA	NA	NA	NA	NA
dd_Smed_v6_11047_0_1	NA	NA	NA	1931	4.43331	2.49642	8.16e-08	4.66088	2.49642	2.44e-08	21.6052	25.2968	0.85407	dodgerblue	PL06016B1E11	0.589594	6.56501	0.0064788	NA	NA	NA	NA	NA	NA	NA	NA	NA	NA	NA	NA	NA	NA	NA	NA	NA	NA	NA	NA	NA	NA	NA	NA	NA	NA	NA	NA	NA	NA	NA
dd_Smed_v6_11065_0_1	NA	NA	NA	435	3.88739	3.25362	5.05e-16	4.18893	3.25362	4.92e-18	14.7986	18.2387	0.811386	dodgerblue	NA	NA	NA	NA	NA	NA	NA	NA	NA	NA	NA	NA	NA	NA	NA	NA	NA	NA	NA	NA	NA	NA	NA	NA	NA	NA	NA	NA	NA	NA	NA	NA	NA	NA	NA
dd_Smed_v6_1107_0_1	NA	UBA1	Ubiquitin-like modifier-activating enzyme 1	3197	1.30617	7.11796	1.25e-05	1.07065	7.11796	0.000470233	2.47285	2.10038	1.17733	darkblue	Contig931	0.99153	8.54574	0.000164273	NA	17,20,23,24,33,35	Cathepsin+ cell,Neural,Epidermal	7	NA	NA	P22314	UBA1	Ubiquitin-like modifier-activating enzyme 1	0	1021	40.94	Q02053	Uba1	Ubiquitin-like modifier-activating enzyme 1	0	1021	40.842	F1RCA1	uba1	Ubiquitin-like modifier-activating enzyme 1	0	1020	40.98	Q8T0L3	Uba1	GH24511p	0	1017	41.495	Q27481
dd_Smed_v6_1109_0_1	NA	KY	Kyphoscoliosis peptidase	3361	1.38094	5.39692	0.00018376	1.37292	5.39692	0.000232457	2.60438	2.58994	1.00558	darkblue	Contig6471	0.664933	8.95336	0.00731751	NA	4,10,17,19,24,25,28,29,30,33,37,39	Cathepsin+ cell,Intestine,Epidermal,Pharynx,Protonephridia,Neural	7	aqp+ parenchymal cells,glia	NA	Q8NBH2	KY	Kyphoscoliosis peptidase	1.6e-31	440	24.773	Q8C8H8	Ky	Kyphoscoliosis peptidase	4.72e-34	457	24.726	NA	NA	NA	NA	NA	NA	Q0E908	Hil	Hillarin	1.14e-70	467	32.762	G5EF51
dd_Smed_v6_11093_0_1	NA	NA	NA	1194	1.935	3.92449	1.13e-07	2.18244	3.92449	2.4e-09	3.82378	4.53919	0.842393	dodgerblue	Contig6386	0.401799	7.24296	0.066101	NA	13,14,16	Muscle	NA	NA	NA	NA	NA	NA	NA	NA	NA	NA	NA	NA	NA	NA	NA	NA	NA	NA	NA	NA	NA	NA	NA	NA	NA	NA	NA	NA
dd_Smed_v6_11109_0_1	NA	NA	NA	898	6.13426	0.532382	1.95e-05	6.21524	0.532382	1.81e-05	70.2421	74.2976	0.945415	dodgerblue	PL030004A10D12	1.30385	7.92781	0.000888513	NA	30	Intestine	7	NA	NA	NA	NA	NA	NA	NA	NA	NA	NA	NA	NA	NA	NA	NA	NA	NA	NA	NA	NA	NA	NA	NA	NA	NA	NA	NA
dd_Smed_v6_11118_0_1	znf281	ZNF281	Zinc finger protein 281	3317	1.72313	3.96003	6.46e-07	1.35678	3.96003	0.000121362	3.30152	2.56112	1.28909	darkblue	NA	NA	NA	NA	no_signal_by_WISH	NA	NA	NA	NA	NA	Q9Y2X9	ZNF281	Zinc finger protein 281	2.1e-08	96	30.208	Q6P8L0	Zfp808	Predicted gene, EG630579	1.64e-08	495	21.212	Z4YIT3	si:ch211-216l23.1	Si:ch211-216l23.1	9.69e-08	354	21.751	Q8T9G3	CG11247	SD02478p	4.85e-05	157	24.841	G5EBU4
dd_Smed_v6_11197_0_1	NA	PLPP4	Phospholipid phosphatase 4	1038	1.774	2.25715	0.00707022	1.79239	2.25715	0.00732935	3.42002	3.46388	0.987336	dodgerblue	Contig850	-0.109716	6.13253	0.178644	NA	24	Epidermal	NA	NA	NA	Q5VZY2	PLPP4	Phospholipid phosphatase 4	7.37e-54	240	37.917	Q0VBU9	Plpp4	Phospholipid phosphatase 4	1.17e-52	240	37.5	F1QQD4	plpp5	Phospholipid phosphatase 5	1.69e-49	234	36.325	Q8IGV3	CG12746	RE23632p	8.11e-41	237	35.021	H2KZD1
dd_Smed_v6_1120_0_1	NA	NA	NA	1582	6.38741	8.14804	6.12e-69	6.15747	8.14804	2.01e-65	83.7146	71.3809	1.17279	darkblue	Contig763	2.62248	10.567	5.92e-05	NA	6,19,30	Intestine	4,5,7	phagocytes	Gut	NA	NA	NA	NA	NA	NA	NA	NA	NA	NA	NA	NA	F1QSR7	panx1b	Pannexin	0.000733	117	24.786	P33085	shakB	Innexin shaking-B	5.17e-15	299	25.418	O01393
dd_Smed_v6_11203_0_1	NA	NA	NA	1037	1.16482	3.61203	0.00424512	1.34344	3.61203	0.00091851	2.24205	2.53756	0.883543	dodgerblue	NA	NA	NA	NA	NA	NA	NA	NA	NA	NA	NA	NA	NA	NA	NA	NA	NA	NA	NA	NA	NA	NA	NA	NA	NA	NA	NA	NA	NA	NA	NA	NA	NA	NA	NA
dd_Smed_v6_1122_0_1	NA	SPTBN1	Spectrin beta chain, non-erythrocytic 1	7261	1.08972	8.45556	0.000688073	0.990411	8.45556	0.00259245	2.12833	1.98675	1.07126	darkblue	PL04020B2G03	0.130998	7.49879	0.424806	NA	2,3,4,6,10,11,19,24,25,28,29,30,31,35,42	Epidermal,Cathepsin+ cell,Intestine,Pharynx,Protonephridia	2,5,7	pharynx cell type progenitors,early epidermal progenitors,late epidermal progenitors 2,late epidermal progenitors 1,epidermis DVb,epidermis,pgrn+ parenchymal cells,phagocytes,pigment,glia	Early_epithelial_progeny	Q01082	SPTBN1	Spectrin beta chain, non-erythrocytic 1	0	2348	37.223	Q62261	Sptbn1	Spectrin beta chain, non-erythrocytic 1	0	2347	37.367	F1QQE5	sptb	Spectrin beta chain	0	2370	34.473	Q99140	kst	BetaH spectrin	1.52e-123	758	38.127	Q9U9J8
dd_Smed_v6_1123_0_1	NA	DPP7	Dipeptidyl peptidase 2	1694	3.1765	7.06298	8.49e-26	3.05997	7.06298	3.49e-24	9.04114	8.33958	1.08412	darkblue	Contig5265	2.35946	9.12193	0.000299452	NA	10,17,19,28,30	Cathepsin+ cell,Intestine	4	NA	NA	Q9UHL4	DPP7	Dipeptidyl peptidase 2	5.33e-139	458	47.817	Q9ET22	Dpp7	Dipeptidyl peptidase 2	2.65e-139	448	50	Q5CZT1	dpp7	Dipeptidyl-peptidase 7	6.47e-146	453	49.227	Q9VIM0	CG2493	CG2493, isoform A	8.24e-86	452	37.611	P34676
dd_Smed_v6_1124_0_1	NA	NA	NA	661	1.45365	6.61961	8.6e-05	1.29864	6.61961	0.000573056	2.739	2.45997	1.11343	darkblue	Contig319	1.16257	9.45672	0.000371787	NA	9,17,20,21,24,27,37	Neural,Cathepsin+ cell,Epidermal,Pharynx	7	NA	NA	NA	NA	NA	NA	NA	NA	NA	NA	NA	NA	NA	NA	NA	NA	NA	NA	NA	NA	NA	NA	NA	NA	NA	NA	NA
dd_Smed_v6_11251_0_1	NA	DHDH	Trans-1,2-dihydrobenzene-1,2-diol dehydrogenase	1164	4.54402	3.44905	1.92e-19	3.96268	3.44905	1.4e-15	23.3284	15.5914	1.49624	darkblue	Contig4234	1.09137	7.46134	0.00068954	NA	NA	NA	7	NA	NA	Q9UQ10	DHDH	Trans-1,2-dihydrobenzene-1,2-diol dehydrogenase	2.64e-07	127	24.409	Q9DBB8	Dhdh	Trans-1,2-dihydrobenzene-1,2-diol dehydrogenase	1.05e-07	132	21.97	Q642M9	dhdh	Trans-1,2-dihydrobenzene-1,2-diol dehydrogenase	1.09e-09	177	23.729	NA	NA	NA	NA	NA	NA	NA
dd_Smed_v6_11252_0_1	NA	KANK1	KN motif and ankyrin repeat domain-containing protein 1	1658	1.82798	3.77423	3.76e-05	2.02324	3.77423	5.54e-06	3.55041	4.06495	0.87342	dodgerblue	PL08006B1H10	0.203407	7.04143	0.136033	NA	NA	NA	NA	NA	NA	Q14678	KANK1	KN motif and ankyrin repeat domain-containing protein 1	6.66e-46	244	41.393	Q810T9	Kank1	Kank1 protein	2.88e-50	244	42.213	Q7SZV7	kank2	Novel protein	1.85e-45	205	42.439	A0A0B4JD77	Kank	Kank, isoform J	5.45e-40	220	39.091	G5EDN8
dd_Smed_v6_1127_0_1	NA	HEL-S-182mP	Glycine N-methyltransferase	1272	4.58207	6.64068	1.94e-29	4.81552	6.64068	1.04e-31	23.952	28.1589	0.850602	dodgerblue	Contig3695	-0.633554	8.45302	0.00154633	NA	19	Intestine	2,5	NA	NA	V9HW60	HEL-S-182mP	Glycine N-methyltransferase	2.18e-116	316	56.962	Q9QXF8	Gnmt	Glycine N-methyltransferase	1.6e-116	313	56.869	NA	NA	NA	NA	NA	NA	Q9VG42	Gnmt	Glycine N-methyltransferase	1.81e-103	310	51.29	NA
dd_Smed_v6_11287_0_1	NA	CALB2	Calretinin	1206	2.2023	2.50107	3.3e-05	1.59584	2.50107	0.00358554	4.60211	3.02271	1.52251	green	Contig7165	-0.136393	5.87442	0.437906	NA	38	Parapharyngeal	NA	NA	NA	P22676	CALB2	Calretinin	2.63e-55	287	42.509	Q08331	Calb2	Calretinin	8.95e-55	284	42.606	Q5XJX1	scgn	Secretagogin	1.66e-54	286	38.462	P41044	Cbp53E	Calbindin-32	6.06e-92	298	53.356	NA
dd_Smed_v6_11295_1_1	NA	AURKC	Aurora kinase C	1783	3.13674	1.86863	0.000526944	2.46714	1.86863	0.00754557	8.79534	5.52945	1.59064	green	Contig6780	0.0729926	6.32106	0.569777	NA	10	Cathepsin+ cell	NA	NA	NA	Q9UQB9	AURKC	Aurora kinase C	1.38e-35	260	30.385	O88445	Aurkc	Aurora kinase C	4.63e-37	262	28.626	E7F683	map3k2	Mitogen-activated protein kinase kinase kinase 2	5.8e-34	265	32.453	Q9VEN3	GckIII	FI20177p1	1.31e-31	258	32.171	G5EDL3
dd_Smed_v6_1130_0_1	NA	SERINC3	Serine incorporator 3	1644	1.08542	6.34727	0.00255958	0.584741	6.34727	0.15242	2.122	1.49977	1.41488	darkblue	Contig4476	0.435717	8.12036	0.0224521	NA	8,10,17,21,24,27,28,40	Neural,Cathepsin+ cell,Epidermal,Pharynx,Protonephridia	NA	NA	NA	Q13530	SERINC3	Serine incorporator 3	4.06e-119	445	47.416	Q9QZI8	Serinc1	Serine incorporator 1	1.03e-120	441	47.619	Q7SZW7	serinc1	Serine incorporator 1	1.44e-129	439	50.797	M9PFR2	TMS1	TMS1, isoform F	3.25e-79	398	43.719	Q95XV3
dd_Smed_v6_1133_0_1	NA	ATG12	Ubiquitin-like protein ATG12	379	1.41511	5.42831	1.09e-07	1.26924	5.42831	2.45e-06	2.66681	2.41035	1.1064	darkblue	Contig3614	1.08248	8.88386	0.000772869	NA	NA	NA	NA	NA	NA	O94817	ATG12	Ubiquitin-like protein ATG12	4.8e-32	97	47.423	Q9CQY1	Atg12	Ubiquitin-like protein ATG12	5.8e-32	97	47.423	F1Q9E0	atg12	Ubiquitin-like protein ATG12	3.93e-30	106	44.34	Q9VTU1	Atg12	Autophagy protein 12-like	2.65e-22	111	36.937	Q10931
dd_Smed_v6_11330_0_1	slc10a2	SLC10A2	Ileal sodium/bile acid cotransporter	1705	1.41597	2.96163	0.0148804	1.82234	2.96163	0.0014837	2.66839	3.53653	0.754522	dodgerblue	NA	NA	NA	NA	basal low	16,19,28,31	Muscle,Intestine,Cathepsin+ cell	2,5	NA	NA	Q12908	SLC10A2	Ileal sodium/bile acid cotransporter	3.08e-37	288	32.292	P70172	Slc10a2	Ileal sodium/bile acid cotransporter	5.79e-41	301	31.894	Q7T3A9	slc10a2	Slc10a2 protein	3.43e-35	296	30.743	NA	NA	NA	NA	NA	NA	NA
dd_Smed_v6_1137_0_1	NA	CYLD	Ubiquitin carboxyl-terminal hydrolase CYLD	3301	1.5245	5.28539	4.18e-07	1.52278	5.28539	5.01e-07	2.87688	2.87345	1.0012	darkblue	NA	NA	NA	NA	NA	9,10,17,18,20,21,23,24,26,33,37	Neural,Cathepsin+ cell,Epidermal,Protonephridia,Pharynx	7	cav-1+ neurons,GABA neurons,ChAT neurons 2,secretory 2,pharynx cell type,phagocytes,aqp+ parenchymal cells,ldlrr-1+ parenchymal cells	NA	Q9NQC7	CYLD	Ubiquitin carboxyl-terminal hydrolase CYLD	1.15e-37	475	26.947	Q80TQ2	Cyld	Ubiquitin carboxyl-terminal hydrolase CYLD	1.27e-37	477	27.254	F8W5E2	cylda	Cylindromatosis (turban tumor syndrome), a	9.81e-40	480	26.458	Q8IPC3	CYLD	Cylindromatosis ortholog, isoform B	1.36e-40	493	26.369	Q7JMS4
dd_Smed_v6_11404_0_1	NA	BNIP1	Vesicle transport protein SEC20	937	0.559013	3.13349	0.288306	1.23767	3.13349	0.00857506	1.47326	2.35817	0.624747	orange	Contig2452	0.549217	6.56217	0.00297962	NA	NA	NA	NA	NA	NA	Q12981	BNIP1	Vesicle transport protein SEC20	2.14e-05	195	24.103	Q6QD59	Bnip1	Vesicle transport protein SEC20	9.23e-07	195	24.103	E9QBD8	bnip1a	BCL2/adenovirus E1B-interacting protein 1a	2.97e-08	121	33.058	NA	NA	NA	NA	NA	NA	NA
dd_Smed_v6_11419_0_1	NA	NA	NA	321	2.90977	2.32163	0.000273544	3.12605	2.32163	0.000110042	7.51496	8.73044	0.860777	dodgerblue	NA	NA	NA	NA	NA	NA	NA	NA	NA	NA	NA	NA	NA	NA	NA	NA	NA	NA	NA	NA	NA	NA	NA	NA	NA	NA	NA	NA	NA	NA	NA	NA	NA	NA	NA
dd_Smed_v6_11420_0_1	NA	NA	NA	1356	4.93539	2.35316	7.7e-12	4.71682	2.35316	5.56e-11	30.5986	26.2969	1.16358	darkblue	Contig7091	1.48116	7.12949	0.00138644	NA	9	Neural	NA	NA	NA	NA	NA	NA	NA	NA	NA	NA	NA	NA	NA	NA	NA	NA	NA	NA	NA	NA	NA	Q9VDU7	Naam	LD05707p	2.58e-59	313	37.7	Q7YTI0
dd_Smed_v6_1144_0_1	NA	TNXB	Tenascin-X	1865	5.0464	9.21049	2.39e-55	4.98509	9.21049	2.8e-54	33.046	31.6709	1.04342	darkblue	Contig6089	0.928018	10.1309	0.00324298	NA	6,22,30	Intestine,Neoblast	0,7	phagocytes,gut progenitors	NA	P22105	TNXB	Tenascin-X	7.68e-06	392	23.214	O35452	Tnxb	Tenascin X	2.28e-06	490	21.837	NA	NA	NA	NA	NA	NA	NA	NA	NA	NA	NA	NA	NA
dd_Smed_v6_11452_0_1	NA	LOXL2	Lysyl oxidase homolog 2	1333	2.93454	2.08058	1.21e-05	3.16475	2.08058	2.9e-06	7.64513	8.96776	0.852513	dodgerblue	NA	NA	NA	NA	NA	NA	NA	NA	NA	NA	Q9Y4K0	LOXL2	Lysyl oxidase homolog 2	4.08e-56	329	34.043	Q9Z175	Loxl3	Lysyl oxidase homolog 3	7.69e-55	331	36.556	A1L1V4	loxl2b	Lysyl oxidase homolog 2B	7.61e-59	328	33.537	Q8IH65	lox2	GH05569p	3.67e-61	318	34.906	NA
dd_Smed_v6_11479_0_1	NA	NA	NA	2155	1.06988	4.24991	0.00158014	1.19278	4.24991	0.000422513	2.09925	2.28593	0.918338	dodgerblue	Contig3349	0.689956	6.78462	0.0012502	NA	21	Neural	NA	NA	NA	NA	NA	NA	NA	NA	NA	NA	NA	NA	NA	NA	NA	NA	NA	NA	NA	NA	NA	NA	NA	NA	NA	NA	NA	NA
dd_Smed_v6_1148_0_1	NA	C12orf10	Chromosome 12 open reading frame 10	1387	1.61545	3.82784	0.00431086	1.4635	3.82784	0.0118879	3.06406	2.75777	1.11107	darkblue	Contig1790	-0.129443	10.0232	0.421624	NA	20,23,33	Neural	NA	NA	NA	Q86UA3	C12orf10	Chromosome 12 open reading frame 10	9.14e-108	337	49.555	Q9JK81	Myg1	UPF0160 protein MYG1, mitochondrial	1.56e-105	337	48.961	A0A140LG01	myg1	Melanocyte proliferating gene 1	4.78e-119	345	51.304	Q9VHI8	CG11980	Uncharacterized protein, isoform A	5.25e-75	348	40.805	NA
dd_Smed_v6_115_0_1	novel	NA	NA	614	5.39234	9.54961	1.19e-30	5.66839	9.54961	6.71e-33	42.0007	50.8575	0.82585	dodgerblue	Contig7220	-0.265365	12.8775	0.297668	basal	19,30	Intestine	5	NA	NA	NA	NA	NA	NA	NA	NA	NA	NA	NA	NA	NA	NA	NA	NA	NA	NA	NA	NA	NA	NA	NA	NA	NA	NA	NA
dd_Smed_v6_1150_0_1	NA	MINOS1	MICOS complex subunit MIC10	478	1.02466	7.53691	0.000252027	1.01902	7.53691	0.000317667	2.03448	2.02655	1.00391	darkblue	NA	NA	NA	NA	NA	25	Pharynx	NA	NA	NA	Q5TGZ0	MINOS1	MICOS complex subunit MIC10	2.35e-10	74	47.297	Q7TNS2	Minos1	MICOS complex subunit Mic10	1.63e-10	74	44.595	Q0P405	minos1	MICOS complex subunit MIC10	7.04e-09	62	48.387	NA	NA	NA	NA	NA	NA	Q9N4K0
dd_Smed_v6_11511_0_1	NA	NA	NA	716	5.18709	1.71912	8.27e-08	4.40835	1.71912	3.84e-06	36.4308	21.2347	1.71562	green	NA	NA	NA	NA	NA	NA	NA	NA	NA	NA	NA	NA	NA	NA	NA	NA	NA	NA	NA	NA	NA	NA	NA	NA	NA	NA	NA	NA	NA	NA	NA	NA	NA	NA	NA
dd_Smed_v6_11532_0_1	NA	NA	NA	1460	2.83166	2.5661	5.07e-06	2.48077	2.5661	7.11e-05	7.11891	5.58196	1.27534	darkblue	NA	NA	NA	NA	NA	6	Intestine	0	NA	NA	NA	NA	NA	NA	NA	NA	NA	NA	NA	NA	NA	NA	NA	NA	NA	NA	NA	NA	NA	NA	NA	NA	NA	NA	NA
dd_Smed_v6_1156_0_1	NA	VMP1	Vacuole membrane protein 1	1331	1.49397	5.63603	1.82e-06	1.32817	5.63603	2.81e-05	2.81663	2.51085	1.12178	darkblue	Contig6172	0.838587	10.0062	0.00721924	NA	2,6,25,33	Epidermal,Intestine,Pharynx,Neural	0,7	NA	Early_epithelial_progeny	Q96GC9	VMP1	Vacuole membrane protein 1	3.5e-90	352	45.17	Q99KU0	Vmp1	Vacuole membrane protein 1	2.99e-92	376	43.883	Q6NYY9	vmp1	Vacuole membrane protein 1	1.77e-96	387	44.186	Q7KVQ7	Tango5	Transport and golgi organization 5, isoform B	2.78e-73	373	38.874	Q9XWU8
dd_Smed_v6_1158_0_1	NA	CHMP5	Charged multivesicular body protein 5	1049	1.36605	8.02637	8.95e-07	1.14285	8.02637	5.41e-05	2.57763	2.20817	1.16732	darkblue	Contig3148	1.66171	9.27981	0.000218059	NA	17,30	Cathepsin+ cell,Intestine	4	NA	NA	Q9NZZ3	CHMP5	Charged multivesicular body protein 5	4.98e-78	218	64.679	Q9D7S9	Chmp5	Charged multivesicular body protein 5	4.41e-78	218	64.679	Q7T339	chmp5	Charged multivesicular body protein 5	7.15e-77	218	59.633	Q9VVI9	Vps60	Charged multivesicular body protein 5	1.52e-77	220	61.818	NA
dd_Smed_v6_11586_0_1	NA	SLC39A13	Zinc transporter ZIP13	1353	1.78321	4.7043	3.57e-06	1.5397	4.7043	7.85e-05	3.44191	2.90734	1.18387	darkblue	Contig2544	0.0425047	6.06368	0.643741	NA	6	Intestine	7	NA	NA	Q96H72	SLC39A13	Zinc transporter ZIP13	1.4e-72	305	47.213	Q8BZH0	Slc39a13	Zinc transporter ZIP13	1.22e-78	298	48.658	Q8AW42	slc39a13	Zinc transporter ZIP13	1.04e-76	301	46.844	Q9VAF0	Zip99C	Zinc transporter ZIP13 homolog	2.95e-70	314	41.72	Q17996
dd_Smed_v6_1159_0_1	slc22a6	SLC22A6	Solute carrier family 22 member 6	1972	4.88615	6.78214	4.4e-35	5.13731	6.78214	7.88e-38	29.5718	35.1953	0.840219	dodgerblue	Contig1815	-0.406919	8.2542	0.0129047	basal	19,30	Intestine	2,5	NA	NA	Q4U2R8	SLC22A6	Solute carrier family 22 member 6	9.98e-29	470	22.979	Q8VC69	Slc22a6	Solute carrier family 22 member 6	4.42e-32	423	25.768	A4IG77	slc22a7a	Solute carrier family 22 (organic anion transporter), member 7a	2.95e-31	530	24.906	Q9VCA2	Orct	Organic cation transporter protein	3.12e-33	523	24.283	Q3Y414
dd_Smed_v6_1162_0_1	NA	NA	NA	471	1.86626	4.96776	1.13e-06	1.73467	4.96776	7.26e-06	3.64585	3.32804	1.0955	darkblue	Contig3344	1.51762	8.20287	0.00096844	NA	10,13,24,27,30,37,40	Cathepsin+ cell,Muscle,Epidermal,Pharynx,Intestine,Protonephridia	4	NA	NA	NA	NA	NA	NA	NA	NA	NA	NA	NA	NA	NA	NA	NA	NA	NA	NA	NA	NA	NA	NA	NA	NA	NA	NA	NA
dd_Smed_v6_1163_0_1	NA	TRAF6	TNF receptor-associated factor 6	1507	1.9301	7.89997	7.72e-11	2.00106	7.89997	1.84e-11	3.81081	4.00294	0.952002	dodgerblue	Contig5533	3.02547	9.79346	4.33e-05	NA	10,30,31,39,42	Cathepsin+ cell,Intestine	4	NA	NA	Q9Y4K3	TRAF6	TNF receptor-associated factor 6	7.42e-05	97	26.804	P70196	Traf6	TNF receptor-associated factor 6	0.000749	97	25.773	NA	NA	NA	NA	NA	NA	NA	NA	NA	NA	NA	NA	NA
dd_Smed_v6_11636_0_1	NA	NA	NA	594	4.24743	4.28262	3.05e-19	4.0916	4.28262	4.42e-18	18.9935	17.0488	1.11407	darkblue	NA	NA	NA	NA	NA	NA	NA	NA	NA	NA	NA	NA	NA	NA	NA	NA	NA	NA	NA	NA	NA	NA	NA	NA	NA	NA	NA	NA	NA	NA	NA	NA	NA	NA	NA
dd_Smed_v6_11644_0_1	NA	IQSEC1	IQ motif and SEC7 domain-containing protein 1	1602	2.0075	2.81515	0.000150425	1.55817	2.81515	0.00438998	4.02085	2.94481	1.3654	darkblue	NA	NA	NA	NA	NA	39	Cathepsin+ cell	NA	NA	NA	Q6DN90	IQSEC1	IQ motif and SEC7 domain-containing protein 1	1.8e-39	347	26.801	Q3TES0	Iqsec3	IQ motif and SEC7 domain-containing protein 3	2.4e-39	336	29.167	A0A0G2L9N5	iqsec2a	Uncharacterized protein	1.55e-43	353	28.612	Q95U36	siz	GH10594p	4.97e-41	334	29.641	Q94287
dd_Smed_v6_11648_0_1	NA	NA	NA	327	4.42508	1.77887	1.95e-06	4.11309	1.77887	9.62e-06	21.4823	17.3047	1.24141	darkblue	NA	NA	NA	NA	NA	NA	NA	4	NA	NA	NA	NA	NA	NA	NA	NA	NA	NA	NA	NA	NA	NA	NA	NA	NA	NA	NA	NA	NA	NA	NA	NA	NA	NA	NA
dd_Smed_v6_1165_0_1	NA	CAPZB	F-actin-capping protein subunit beta	1157	1.31798	7.55216	4.56e-06	1.21417	7.55216	2.99e-05	2.49318	2.32007	1.07461	darkblue	Contig1530	1.70079	9.42893	5e-05	NA	10,17,30,39	Cathepsin+ cell,Intestine	4	NA	Cluster 11	P47756	CAPZB	F-actin-capping protein subunit beta	2.72e-125	245	69.388	P47757	Capzb	F-actin-capping protein subunit beta	3.34e-125	245	69.388	Q7SXP1	capzb	Capping protein (Actin filament) muscle Z-line, beta	1.16e-125	267	64.045	P48603	cpb	F-actin-capping protein subunit beta	3.51e-128	266	65.414	P34686
dd_Smed_v6_11653_0_1	NA	NELL1	Protein kinase C-binding protein NELL1	2831	1.66711	2.63028	0.00227383	1.79102	2.63028	0.00111151	3.17578	3.4606	0.917695	dodgerblue	Contig4246	0.159773	6.07278	0.51727	NA	13,14,19,20	Muscle,Intestine,Neural	5	NA	NA	Q92832	NELL1	Protein kinase C-binding protein NELL1	1.77e-63	858	25.524	Q2VWQ2	Nell1	Protein kinase C-binding protein NELL1	2.51e-62	795	25.912	F1QCA7	notch1b	Notch 1b	2.89e-17	240	32.083	P07207	N	Neurogenic locus Notch protein	4.03e-17	187	36.364	O77469
dd_Smed_v6_11657_0_1	NA	ISLR	Immunoglobulin superfamily containing leucine-rich repeat protein	1870	1.54966	2.83821	0.0173849	1.72331	2.83821	0.0085092	2.92748	3.30193	0.886595	dodgerblue	NA	NA	NA	NA	NA	13	Muscle	NA	NA	NA	O14498	ISLR	Immunoglobulin superfamily containing leucine-rich repeat protein	2.02e-10	127	28.346	Q6GU68	Islr	Immunoglobulin superfamily containing leucine-rich repeat protein	3.93e-10	142	26.056	F1QKZ8	lrig2	Leucine-rich repeats and immunoglobulin-like domains 2	2.36e-08	157	29.299	Q9VUN0	Toll-6	Toll-like receptor 6	4.85e-08	166	26.506	Q18902
dd_Smed_v6_11660_0_1	NA	ATXN1	Ataxin-1	1297	6.6253	3.85829	8.3e-34	6.30001	3.85829	2.83e-31	98.7222	78.7935	1.25292	darkblue	NA	NA	NA	NA	NA	27,30	Pharynx,Intestine	4	NA	NA	P54253	ATXN1	Ataxin-1	5.39e-15	117	39.316	P54254	Atxn1	Ataxin-1	1.9e-15	158	34.81	Q1L966	atxn1a	Ataxin 1a	1.5e-15	117	41.026	Q9W3V7	Atx-1	Ataxin 1	3e-09	125	27.2	NA
dd_Smed_v6_1167_0_1	NA	CASP7	Caspase-7	952	2.20701	7.37583	2.81e-12	1.94326	7.37583	8.76e-10	4.61718	3.84573	1.2006	darkblue	Contig2992	1.47514	10.1189	4.04e-05	NA	6,24,27,29,30,37	Intestine,Epidermal,Pharynx,Protonephridia	4,7	NA	NA	P55210	CASP7	Caspase-7	9.91e-68	261	42.529	P97864	Casp7	Caspase-7	1.22e-65	233	44.206	F1Q7K7	casp3b	Caspase 3, apoptosis-related cysteine peptidase b	1.52e-68	252	42.46	O02002	Dcp-1	Caspase-1	9.99e-55	238	41.176	D3YT61
dd_Smed_v6_11686_0_1	NA	TMC5	Transmembrane channel-like protein 5	2207	4.57753	2.58969	7.24e-06	4.05551	2.58969	6.31e-05	23.8767	16.6276	1.43597	darkblue	NA	NA	NA	NA	NA	30	Intestine	NA	NA	NA	Q6UXY8	TMC5	Transmembrane channel-like protein 5	3.27e-05	439	20.957	NA	NA	NA	NA	NA	NA	E7FDU7	si:dkey-202l16.5	Transmembrane channel-like protein	3.38e-06	526	21.863	NA	NA	NA	NA	NA	NA	NA
dd_Smed_v6_11707_0_1	NA	NA	NA	1732	1.92397	3.41388	4.73e-05	2.00579	3.41388	2.5e-05	3.79467	4.01608	0.944869	dodgerblue	NA	NA	NA	NA	NA	10,15,17,28,31,41	Cathepsin+ cell	NA	NA	NA	NA	NA	NA	NA	NA	NA	NA	NA	NA	NA	NA	NA	NA	NA	NA	NA	NA	NA	NA	NA	NA	NA	NA	NA	NA
dd_Smed_v6_1171_0_1	NA	SLC13A3	Solute carrier family 13 member 3	1896	6.71202	7.19283	2.59e-67	6.6005	7.19283	1.72e-65	104.838	97.0393	1.08037	darkblue	Contig7480	2.83985	8.6752	0.000625045	NA	30	Intestine	4	phagocytes	Gut	Q8WWT9	SLC13A3	Solute carrier family 13 member 3	2.3e-55	549	28.415	Q91Y63	Slc13a3	Solute carrier family 13 member 3	8.88e-54	548	28.285	G0X6X8	slc13a5a	Sodium-dependent citrate transporter	1.12e-58	556	30.036	Q9VVT2	Indy	Protein I'm not dead yet	4.11e-36	568	23.239	Q93655
dd_Smed_v6_11714_0_1	NA	NR1I3	Nuclear receptor subfamily 1 group I member 3	2306	3.13654	4.23782	6.39e-19	3.15088	4.23782	5.01e-19	8.79413	8.88196	0.990111	dodgerblue	Contig2962	1.02675	6.56823	0.180683	NA	NA	NA	NA	NA	NA	B7Z8R7	NR1I3	Nuclear receptor subfamily 1 group I member 3	5.16e-19	72	51.389	Q8R1B8	Rorb	Nuclear receptor ROR-beta	7.02e-19	464	23.491	Q1L673	vdrb	Vitamin D3 receptor B	2.76e-29	459	26.362	Q24143	Hr96	Nuclear hormone receptor HR96	1.04e-25	83	60.241	G5EFF5
dd_Smed_v6_11730_0_1	NA	SLC52A3	Solute carrier family 52, riboflavin transporter, member 3	1478	6.43733	5.60484	7.29e-58	6.28066	5.60484	9.33e-56	86.662	77.7439	1.11471	darkblue	NA	NA	NA	NA	NA	NA	NA	NA	NA	NA	Q9NQ40	SLC52A3	Solute carrier family 52, riboflavin transporter, member 3	2.92e-66	445	31.91	Q9D6X5	Slc52a3	Solute carrier family 52, riboflavin transporter, member 3	1.37e-72	441	34.24	NA	NA	NA	NA	NA	NA	Q9V9S9	CG11576	Uncharacterized protein	2e-62	422	29.858	Q3LFN0
dd_Smed_v6_11741_0_1	NA	B3GALNT1	UDP-GalNAc:beta-1,3-N-acetylgalactosaminyltransferase 1	1352	3.95166	2.51193	8.25e-06	4.08881	2.51193	4.96e-06	15.4728	17.0159	0.909313	dodgerblue	Contig2368	0.520376	6.78142	0.0136855	NA	25,27,30,32,37,40	Pharynx,Intestine,Neural,Protonephridia	7	NA	NA	O75752	B3GALNT1	UDP-GalNAc:beta-1,3-N-acetylgalactosaminyltransferase 1	1.07e-29	304	32.895	Q920V1	B3galnt1	UDP-GalNAc:beta-1,3-N-acetylgalactosaminyltransferase 1	4.37e-29	304	32.566	Q502B3	b3galnt2	UDP-GalNAc:beta-1,3-N-acetylgalactosaminyltransferase 2	0.00041	149	24.832	Q9VZA6	BcDNA:GM04393	Hexosyltransferase	1.16e-17	254	24.803	Q8MQG4
dd_Smed_v6_11763_0_1	NA	NA	NA	2042	1.31819	2.82388	0.00716815	0.556664	2.82388	0.349805	2.49353	1.47086	1.69528	green	NA	NA	NA	NA	NA	11	Epidermal	NA	NA	NA	NA	NA	NA	NA	NA	NA	NA	NA	NA	NA	NA	NA	NA	NA	NA	NA	NA	NA	NA	NA	NA	NA	NA	NA	NA
dd_Smed_v6_11765_0_1	NA	NA	NA	1814	3.93804	4.0577	6.16e-17	3.69163	4.0577	3.22e-15	15.3274	12.9208	1.18625	darkblue	NA	NA	NA	NA	NA	NA	NA	NA	NA	NA	NA	NA	NA	NA	NA	NA	NA	NA	NA	NA	NA	NA	NA	NA	NA	NA	NA	NA	NA	NA	NA	NA	NA	NA	NA
dd_Smed_v6_11807_0_1	sert	SLC6A19	Sodium-dependent neutral amino acid transporter B(0)AT1	1883	5.54348	2.49242	3.15e-12	5.26935	2.49242	2.8e-11	46.6394	38.5684	1.20926	darkblue	Contig92	1.9174	7.26409	0.00010083	uniform subset	NA	NA	NA	NA	NA	Q695T7	SLC6A19	Sodium-dependent neutral amino acid transporter B(0)AT1	6.05e-12	132	31.818	Q9D687	Slc6a19	Sodium-dependent neutral amino acid transporter B(0)AT1	7.45e-12	140	31.429	Q1WGB5	slc6a4a	Transporter	2.81e-14	427	24.122	P51905	SerT	Sodium-dependent serotonin transporter	1.44e-18	518	23.166	P90890
dd_Smed_v6_11818_0_1	NA	SLC15A4	Solute carrier family 15 member 4	1970	2.04827	4.48799	1.66e-07	2.13421	4.48799	5.65e-08	4.1361	4.38998	0.942168	dodgerblue	PL05017B1B03	0.592897	6.40355	0.0115357	NA	30	Intestine	NA	NA	NA	Q8N697	SLC15A4	Solute carrier family 15 member 4	2.63e-13	258	29.457	Q8BPX9	Slc15a3	Solute carrier family 15 member 3	8.62e-11	262	25.573	NA	NA	NA	NA	NA	NA	NA	NA	NA	NA	NA	NA	NA
dd_Smed_v6_11845_0_1	NA	NA	NA	807	7.12928	3.64012	1.6e-41	6.81706	3.64012	1.07e-38	139.999	112.756	1.24161	darkblue	Contig7303	1.86231	8.29877	0.0110221	NA	30	Intestine	NA	NA	NA	NA	NA	NA	NA	NA	NA	NA	NA	NA	NA	NA	NA	NA	NA	NA	NA	NA	NA	NA	NA	NA	NA	NA	NA	NA
dd_Smed_v6_11852_0_1	NA	NA	NA	1446	5.68863	3.31973	1.4e-20	5.51718	3.31973	1.33e-19	51.576	45.7969	1.12619	darkblue	NA	NA	NA	NA	NA	15,17,39	Cathepsin+ cell	NA	NA	NA	NA	NA	NA	NA	NA	NA	NA	NA	NA	NA	NA	NA	NA	NA	NA	NA	NA	NA	NA	NA	NA	NA	NA	NA	NA
dd_Smed_v6_11859_0_1	NA	NA	NA	442	3.59614	1.61713	0.000421589	3.48321	1.61713	0.000716429	12.0934	11.1828	1.08142	darkblue	PL06023B1A06	0.481568	7.03155	0.0411797	NA	NA	NA	NA	NA	NA	NA	NA	NA	NA	NA	NA	NA	NA	NA	NA	NA	NA	NA	NA	NA	NA	NA	NA	NA	NA	NA	NA	NA	NA	NA
dd_Smed_v6_11906_0_1	NA	CMA1	Chymase	1200	6.31277	3.4343	2.76e-22	6.49451	3.4343	3.36e-23	79.4939	90.1658	0.881641	dodgerblue	NA	NA	NA	NA	NA	NA	NA	NA	NA	NA	P23946	CMA1	Chymase	4.62e-20	172	32.558	Q9D960	Ctrl	Putative uncharacterized protein	3e-19	201	30.846	Q66HW9	ctrl	Chymotrypsin-like	1.39e-20	175	34.286	Q9VR15	CG3355	CG3355, isoform A	7.49e-17	189	29.101	Q17800
dd_Smed_v6_11914_0_1	NA	SRD5A1	3-oxo-5-alpha-steroid 4-dehydrogenase 1	959	1.75987	1.97566	0.00660389	1.80636	1.97566	0.00583071	3.38668	3.49758	0.968293	dodgerblue	NA	NA	NA	NA	NA	NA	NA	NA	NA	NA	P18405	SRD5A1	3-oxo-5-alpha-steroid 4-dehydrogenase 1	5.48e-38	255	38.039	Q68FF9	Srd5a1	3-oxo-5-alpha-steroid 4-dehydrogenase 1	2.88e-44	254	39.37	A5PMI4	srd5a1	Steroid-5-alpha-reductase, alpha polypeptide 1 (3-oxo-5 alpha-steroid delta 4-dehydrogenase alpha 1)	6.15e-52	267	42.322	Q9VZL3	Sc2	Sc2	9.45e-12	94	37.234	Q20344
dd_Smed_v6_11936_0_1	NA	ARHGEF10	Rho guanine nucleotide exchange factor 10	2831	1.60556	4.09002	7.66e-05	1.79042	4.09002	1.09e-05	3.04313	3.45916	0.879732	dodgerblue	PL06020B2B10	0.339585	6.92918	0.234555	NA	24	Epidermal	NA	NA	NA	O15013	ARHGEF10	Rho guanine nucleotide exchange factor 10	1.34e-07	379	20.053	Q8C033	Arhgef10	Rho guanine nucleotide exchange factor 10	8.31e-08	211	23.223	NA	NA	NA	NA	NA	NA	Q9VEF7	CG43102	Uncharacterized protein, isoform A	4.14e-05	204	17.647	A7LPE3
dd_Smed_v6_11947_0_1	NA	NAGA	Alpha-N-acetylgalactosaminidase	1561	4.78305	4.74725	1.23e-34	5.07489	4.74725	5.48e-38	27.5323	33.705	0.81686	dodgerblue	NA	NA	NA	NA	NA	NA	NA	NA	NA	NA	P17050	NAGA	Alpha-N-acetylgalactosaminidase	9.63e-101	391	43.99	P51569	Gla	Alpha-galactosidase A	9.7e-102	334	48.503	F1Q5G5	gla	Galactosidase, alpha	5.83e-102	332	49.096	Q9VL27	CG5731	CG5731	2.42e-113	391	43.478	Q21801
dd_Smed_v6_1195_0_1	NA	SYNGR1	Synaptogyrin-1	2517	1.22205	6.24458	1.5e-05	0.968338	6.24458	0.000854325	2.33278	1.95658	1.19227	darkblue	Contig7705	0.444705	7.89767	0.13865	NA	7,13,14,16	Muscle	NA	NA	Muscle	O43759	SYNGR1	Synaptogyrin-1	1.79e-30	186	40.86	O55101	Syngr2	Synaptogyrin-2	1.04e-31	157	44.586	Q503N6	syngr3a	Synaptogyrin	1.42e-33	197	41.117	Q7JYV2	Syngr	Synaptogyrin	4.8e-25	197	32.995	Q21625
dd_Smed_v6_11957_0_1	NA	PI16	Peptidase inhibitor 16	1166	5.88855	3.64907	1.14e-23	5.50569	3.64907	2.47e-21	59.2422	45.4335	1.30393	darkblue	NA	NA	NA	NA	NA	30	Intestine	4	NA	NA	Q6UXB8	PI16	Peptidase inhibitor 16	8.96e-07	110	30	Q9ET66	Pi16	Peptidase inhibitor 16	3.07e-08	128	32.031	NA	NA	NA	NA	NA	NA	NA	NA	NA	NA	NA	NA	NA
dd_Smed_v6_12010_0_1	lin-48	OVOL1	Putative transcription factor Ovo-like 1	944	1.5363	1.98309	0.0555771	2.49115	1.98309	0.00139214	2.9005	5.62225	0.515897	orange	NA	NA	NA	NA	no_signal_by_WISH	35	Epidermal	NA	NA	NA	O14753	OVOL1	Putative transcription factor Ovo-like 1	5.05e-51	136	57.353	Q9WTJ2	Ovol1	Putative transcription factor Ovo-like 1	5.27e-51	136	58.088	A9JSU5	ovol1	Zgc:171804 protein	7.03e-52	124	60.484	P51521	ovo	Protein ovo	2.53e-47	149	55.034	G5EDU6
dd_Smed_v6_12018_0_1	NA	SEMA4A	Semaphorin-4A	2368	4.59647	2.25157	6.29e-07	4.50137	2.25157	1.17e-06	24.1921	22.6489	1.06814	darkblue	Contig5140	1.13033	6.82573	0.000832641	NA	30,43	Intestine	NA	NA	NA	Q9H3S1	SEMA4A	Semaphorin-4A	6.49e-11	351	21.368	Q62178	Sema4a	Semaphorin-4A	1.83e-10	369	22.222	F1QG92	sema6dl	Sema domain, transmembrane domain (TM), and cytoplasmic domain, (semaphorin) 6D,-like	5.04e-11	372	25.269	Q24322	Sema-1a	Semaphorin-1A	6.08e-11	383	26.11	Q17330
dd_Smed_v6_1204_0_1	NA	EIF4EBP2	Eukaryotic translation initiation factor 4E-binding protein 2	956	1.55384	5.4977	0.000400186	1.49414	5.4977	0.000790313	2.93597	2.81696	1.04225	darkblue	Contig6575	-0.460453	9.64445	0.130856	NA	22	Neoblast	NA	NA	NA	Q13542	EIF4EBP2	Eukaryotic translation initiation factor 4E-binding protein 2	1e-07	71	47.887	P70445	Eif4ebp2	Eukaryotic translation initiation factor 4E-binding protein 2	6.38e-08	71	47.887	Q6NYL2	eif4ebp2	Eukaryotic translation initiation factor 4E binding protein 2	6.54e-10	108	42.593	Q9XZ56	Thor	4E-binding protein THOR	0.000371	98	38.776	NA
dd_Smed_v6_12088_0_1	NA	NA	NA	366	1.23847	4.12648	0.00479199	1.01998	4.12648	0.0263545	2.35948	2.02789	1.16352	darkblue	NA	NA	NA	NA	NA	NA	NA	NA	NA	NA	NA	NA	NA	NA	NA	NA	NA	NA	NA	NA	NA	NA	NA	NA	NA	NA	NA	NA	NA	NA	NA	NA	NA	NA	NA
dd_Smed_v6_1212_0_1	NA	MAP3K3	Mitogen-activated protein kinase kinase kinase 3	1741	2.18919	5.55119	4.27e-08	2.05279	5.55119	3.25e-07	4.56051	4.14908	1.09916	darkblue	Contig764	1.52631	9.06384	0.000125859	NA	17,30	Cathepsin+ cell,Intestine	4	NA	NA	Q99759	MAP3K3	Mitogen-activated protein kinase kinase kinase 3	9.21e-25	183	37.158	Q61084	Map3k3	Mitogen-activated protein kinase kinase kinase 3	1.42e-24	183	37.158	E7EXX1	map3k3	Mitogen-activated protein kinase kinase kinase 3	8.28e-27	188	38.83	Q24190	Pak	Serine/threonine kinase PAK homolog DPAK	5.17e-20	161	32.298	O01325
dd_Smed_v6_1216_0_1	NA	NA	NA	1912	1.03001	6.55861	0.000213636	0.967618	6.55861	0.00062484	2.04204	1.95561	1.0442	darkblue	Contig474	1.39073	8.77115	0.0001838	NA	10,17,28,30	Cathepsin+ cell,Intestine	4	NA	NA	NA	NA	NA	NA	NA	NA	NA	NA	NA	NA	NA	NA	NA	NA	NA	NA	NA	NA	NA	NA	NA	NA	NA	NA	NA
dd_Smed_v6_12185_0_1	NA	NA	NA	2582	1.4541	3.57366	0.000936841	1.4601	3.57366	0.00100997	2.73986	2.75127	0.995853	dodgerblue	PL06010A2E11	0.287655	6.43131	0.108747	NA	24	Epidermal	NA	NA	NA	NA	NA	NA	NA	NA	NA	NA	NA	NA	NA	NA	NA	NA	NA	NA	NA	NA	NA	NA	NA	NA	NA	NA	NA	NA
dd_Smed_v6_12190_0_1	NA	TRAF3	TNF receptor-associated factor 3	446	1.98063	2.71227	0.000789536	2.53026	2.71227	1.86e-05	3.94666	5.77677	0.683195	dodgerblue	NA	NA	NA	NA	NA	NA	NA	NA	NA	NA	Q13114	TRAF3	TNF receptor-associated factor 3	4.69e-07	84	35.714	Q60803	Traf3	TNF receptor-associated factor 3	5.15e-07	84	35.714	Q6DEG0	traf3	TNF receptor-associated factor 3	2.73e-06	53	45.283	NA	NA	NA	NA	NA	NA	NA
dd_Smed_v6_122_0_1	NA	TENM2	Teneurin-2	1196	9.40517	10.1113	5.69e-31	5.88195	10.1113	1.17e-16	678.015	58.9718	11.4973	darkgreen	Contig1776	-1.19646	9.45407	0.001013	NA	NA	NA	8	NA	NA	Q9NT68	TENM2	Teneurin-2	8.12e-05	296	23.649	Q9WTS5	Tenm2	Teneurin-2	0.000243	291	23.024	F1R1T0	si:dkey-34l15.2	Si:dkey-34l15.2	0.000146	227	25.551	NA	NA	NA	NA	NA	NA	P91060
dd_Smed_v6_122_1_1	lipa	LIPA	Lysosomal acid lipase/cholesteryl ester hydrolase	1259	5.22773	10.5841	1.68e-30	5.49513	10.5841	9.29e-33	37.4717	45.1023	0.830816	dodgerblue	Contig1062	-0.291152	11.1507	0.228416	basal posterior	NA	NA	5	NA	NA	P38571	LIPA	Lysosomal acid lipase/cholesteryl ester hydrolase	4.96e-111	405	43.704	Q9Z0M5	Lipa	Lysosomal acid lipase/cholesteryl ester hydrolase	2.22e-105	400	43.75	A8WGN9	lipf	Lipase	4.05e-105	371	42.857	Q9VKS5	CG17099	RE24765p	1.13e-91	403	37.221	Q93789
dd_Smed_v6_12219_0_1	helz2	HELZ2	Helicase with zinc finger domain 2	5869	1.95036	3.70749	1.85e-06	2.4561	3.70749	2.09e-09	3.86471	5.48731	0.7043	dodgerblue	PL06021A1F10	-0.0711373	5.74597	0.592777	peripharyngeal	8,9,23	Neural	NA	NA	NA	Q9BYK8	HELZ2	Helicase with zinc finger domain 2	7.84e-43	309	35.599	E9QAM5	Helz2	Helicase with zinc finger domain 2	9.6e-68	561	32.62	Q7ZVZ4	upf1	UPF1 regulator of nonsense transcripts homolog (Yeast)	9.29e-38	604	26.987	Q9VYS3	Upf1	Regulator of nonsense transcripts 1 homolog	3.23e-35	551	28.675	O76512
dd_Smed_v6_12262_0_1	NA	NOG	Noggin	833	6.19462	4.29128	2.45e-49	6.07525	4.29128	7.35e-48	73.243	67.4266	1.08626	darkblue	Contig1936	1.59799	7.60282	6.11e-05	NA	NA	NA	NA	NA	NA	Q13253	NOG	Noggin	1.01e-13	89	37.079	P97466	Nog	Noggin	1.01e-13	89	37.079	Q9YHV3	nog3	Noggin-3	2.47e-12	125	28.8	NA	NA	NA	NA	NA	NA	NA
dd_Smed_v6_12311_0_1	NA	SLC16A12	Monocarboxylate transporter 12	1465	1.74822	2.84691	0.00218702	2.00942	2.84691	0.000437652	3.35945	4.02621	0.834395	dodgerblue	PL05001B2H12	0.432821	6.62451	0.236121	NA	20,31	Neural,Cathepsin+ cell	NA	NA	NA	Q6ZSM3	SLC16A12	Monocarboxylate transporter 12	3.04e-16	324	23.148	Q8BGC3	Slc16a12	Monocarboxylate transporter 12	6.62e-17	319	21.944	Q503M4	slc16a12b	Monocarboxylate transporter 12-B	1.34e-17	322	25.155	Q7JWI7	CG11665	RE60337p	2.33e-12	260	27.308	O17328
dd_Smed_v6_12313_0_1	NA	MDGA1	MAM domain-containing glycosylphosphatidylinositol anchor protein 1	1983	1.4051	3.14074	0.00353208	1.53844	3.14074	0.00144013	2.64836	2.9048	0.91172	dodgerblue	PL06012B1B10	0.154724	6.29956	0.218897	NA	10	Cathepsin+ cell	7	NA	NA	Q8NFP4	MDGA1	MAM domain-containing glycosylphosphatidylinositol anchor protein 1	9.8e-07	146	26.712	Q0PMG2	Mdga1	MAM domain-containing glycosylphosphatidylinositol anchor protein 1	2.92e-06	146	26.712	B0S758	ttn.2	Titin, tandem duplicate 2	1.08e-05	155	29.677	NA	NA	NA	NA	NA	NA	NA
dd_Smed_v6_12324_0_1	NA	NA	NA	449	4.36812	1.21422	0.000420557	4.16515	1.21422	0.000840485	20.6507	17.9405	1.15106	darkblue	NA	NA	NA	NA	NA	NA	NA	NA	NA	NA	NA	NA	NA	NA	NA	NA	NA	NA	NA	NA	NA	NA	NA	NA	NA	NA	NA	NA	NA	NA	NA	NA	NA	NA	NA
dd_Smed_v6_1233_0_1	NA	MAST4	Microtubule-associated serine/threonine-protein kinase 4	2218	1.81621	5.93202	1.84e-11	1.64899	5.93202	1.33e-09	3.52154	3.13615	1.12289	darkblue	Contig687	0.975219	7.9327	0.00621731	NA	8,10,23,30	Neural,Cathepsin+ cell,Intestine	4	NA	NA	O15021	MAST4	Microtubule-associated serine/threonine-protein kinase 4	3.02e-24	99	48.485	Q811L6	Mast4	Microtubule-associated serine/threonine-protein kinase 4	6.54e-25	99	48.485	E7F723	mast2	Microtubule-associated serine/threonine kinase 2	3.78e-26	126	43.651	Q9VUQ9	dop	Drop out, isoform A	9.22e-24	98	43.878	H9G328
dd_Smed_v6_12376_0_1	NA	TMC5	Transmembrane channel-like protein 5	1166	3.19017	2.50916	2.12e-07	3.23711	2.50916	1.65e-07	9.12718	9.42902	0.967987	dodgerblue	Contig5514	1.99562	7.83619	9.8e-05	NA	NA	NA	NA	NA	NA	Q6UXY8	TMC5	Transmembrane channel-like protein 5	0.000138	72	34.722	Q8C428	Tmc7	Transmembrane channel-like protein 7	2.99e-16	347	21.614	E7FDU7	si:dkey-202l16.5	Transmembrane channel-like protein	0.000122	74	31.081	M9NDN5	Tmc	Transmembrane channel-like, isoform D	1.89e-10	350	23.714	D3KZG3
dd_Smed_v6_1240_0_1	NA	NA	NA	1050	6.09792	6.70489	1.66e-58	6.16733	6.70489	2.19e-59	68.4947	71.8705	0.953029	dodgerblue	Contig708	2.12591	8.8606	4.87e-05	NA	30	Intestine	4,7	phagocytes	NA	NA	NA	NA	NA	NA	NA	NA	NA	NA	NA	NA	NA	NA	NA	NA	NA	NA	NA	NA	NA	NA	NA	NA	NA	NA
dd_Smed_v6_12427_0_1	NA	TWNK	Twinkle protein, mitochondrial	782	1.83838	2.35959	0.00391665	1.73253	2.35959	0.00778692	3.57609	3.32311	1.07613	darkblue	Contig1941	0.402888	6.24154	0.0245536	NA	NA	NA	NA	NA	NA	Q96RR1	TWNK	Twinkle protein, mitochondrial	1.04e-29	146	40.411	Q8CIW5	Twnk	Twinkle protein, mitochondrial	4.28e-29	144	39.583	NA	NA	NA	NA	NA	NA	Q8MZH0	mtDNA-helicase	LD38710p	4.7e-34	137	42.336	Q5WRT0
dd_Smed_v6_1246_0_1	NA	NA	NA	578	1.30193	7.56119	0.000371909	1.03726	7.56119	0.00635458	2.46558	2.05233	1.20135	darkblue	Contig7362	-0.311067	9.11943	0.257617	NA	6	Intestine	NA	NA	NA	NA	NA	NA	NA	NA	NA	NA	NA	NA	NA	NA	NA	NA	NA	NA	NA	NA	NA	Q4QPY7	COX6AL	Cytochrome c oxidase subunit 6A-like	0.000207	88	31.818	NA
dd_Smed_v6_12502_0_1	NA	NA	NA	645	3.57567	4.49724	4e-11	3.7292	4.49724	8.38e-12	11.9229	13.2617	0.899048	dodgerblue	Contig2019	1.13179	6.65286	0.000515484	NA	NA	NA	NA	NA	NA	NA	NA	NA	NA	NA	NA	NA	NA	NA	NA	NA	NA	NA	NA	NA	NA	NA	NA	Q9W2M4	CG10527	Uncharacterized protein	8.29e-11	151	30.464	NA
dd_Smed_v6_1251_0_1	fhl3	FHL3	FHL3 protein	741	2.72641	7.62808	4.38e-17	1.36362	7.62808	3e-05	6.61808	2.57331	2.57182	darkgreen	Contig1621	2.06458	9.49822	0.000208674	uniform medial	9,27,30,36,37,38	Neural,Pharynx,Intestine,Parapharyngeal	4	NA	NA	Q96C98	FHL3	FHL3 protein	1.89e-18	113	38.938	Q9R059	Fhl3	Four and a half LIM domains protein 3	5.23e-16	122	36.066	A0A0R4IWY0	fhl5	Four and a half LIM domains 5	5.36e-16	114	37.719	A1ZA47	Zasp52	PDZ and LIM domain protein Zasp	1.27e-14	116	37.069	G5EFL5
dd_Smed_v6_12511_1_1	NA	NA	NA	433	4.19764	1.11442	0.000960021	5.16909	1.11442	8.25e-05	18.3492	35.9791	0.509994	orange	NA	NA	NA	NA	NA	30	Intestine	4	NA	NA	NA	NA	NA	NA	NA	NA	NA	NA	NA	NA	NA	NA	NA	NA	NA	NA	NA	NA	NA	NA	NA	NA	NA	NA	NA
dd_Smed_v6_12523_0_1	NA	AFMID	Kynurenine formamidase	2546	2.73292	3.12847	3.98e-09	3.06636	3.12847	5.73e-11	6.64799	8.3766	0.793639	dodgerblue	Contig4974	0.122561	7.37148	0.378397	NA	6,19	Intestine	2	NA	NA	Q63HM1	AFMID	Kynurenine formamidase	1.59e-35	283	27.208	Q8K4H1	Afmid	Kynurenine formamidase	9.91e-38	285	28.421	Q566U4	afmid	Kynurenine formamidase	4.63e-44	286	31.469	Q9VMC9	KFase	Kynurenine formamidase	1.43e-17	232	26.724	Q18974
dd_Smed_v6_1255_0_1	NA	ATP6V1C1	V-type proton ATPase subunit C 1	1556	1.76378	7.82248	1.12e-09	1.63959	7.82248	1.85e-08	3.39586	3.11578	1.08989	darkblue	Contig313	1.83386	9.43891	8.57e-05	NA	10,17,30	Cathepsin+ cell,Intestine	4	NA	NA	P21283	ATP6V1C1	V-type proton ATPase subunit C 1	1.21e-135	382	50.524	Q9Z1G3	Atp6v1c1	V-type proton ATPase subunit C 1	2.81e-135	382	50.524	Q7T385	atp6v1c1a	V-type proton ATPase subunit C 1-A	1.93e-138	383	51.436	Q9V7N5	Vha44	V-type proton ATPase subunit C	2.46e-95	287	49.129	Q9XXU9
dd_Smed_v6_12552_0_1	NA	NA	NA	827	1.577	2.38583	0.00849028	1.3304	2.38583	0.0331197	2.98348	2.51472	1.18641	darkblue	NA	NA	NA	NA	NA	10,40	Cathepsin+ cell,Protonephridia	NA	NA	NA	NA	NA	NA	NA	NA	NA	NA	NA	NA	NA	NA	NA	NA	NA	NA	NA	NA	NA	NA	NA	NA	NA	NA	NA	NA
dd_Smed_v6_12558_0_1	NA	TRAPPC9	Trafficking protein particle complex subunit 9	4849	1.52545	4.21737	7.74e-05	0.960804	4.21737	0.019899	2.87877	1.94639	1.47903	darkblue	NA	NA	NA	NA	NA	17	Cathepsin+ cell	NA	NA	NA	Q96Q05	TRAPPC9	Trafficking protein particle complex subunit 9	1.89e-13	426	23.944	Q3U0M1	Trappc9	Trafficking protein particle complex subunit 9	6.08e-14	425	23.294	NA	NA	NA	NA	NA	NA	Q9VIL0	brun	Protein brunelleschi	1.03e-06	115	26.087	NA
dd_Smed_v6_12585_0_1	NA	NA	NA	1376	3.26381	1.654	0.000771645	3.20377	1.654	0.00109605	9.60515	9.21361	1.0425	darkblue	NA	NA	NA	NA	NA	6,19	Intestine	2	NA	NA	NA	NA	NA	NA	NA	NA	NA	NA	NA	NA	NA	NA	NA	NA	NA	NA	NA	NA	NA	NA	NA	NA	NA	NA	NA
dd_Smed_v6_1261_0_1	NA	FTMT	Ferritin, mitochondrial	870	5.55835	7.63427	7.74e-67	5.37359	7.63427	1.88e-63	47.1226	41.4582	1.13663	darkblue	Contig1641	0.578235	8.96002	0.0115821	NA	30	Intestine	4,7	phagocytes	NA	Q8N4E7	FTMT	Ferritin, mitochondrial	9.44e-30	180	36.111	P09528	Fth1	Ferritin heavy chain	3.54e-30	173	37.572	B7ZVS7	wu:fj24c01	Ferritin	1.59e-35	166	40.361	Q9VYH1	Fer3HCH	Ferritin	1.92e-29	163	38.037	Q9TYS3
dd_Smed_v6_12626_0_1	NA	SLC35C1	GDP-fucose transporter 1	1149	1.60746	2.69622	0.00945434	0.933048	2.69622	0.179736	3.04715	1.90931	1.59594	green	NA	NA	NA	NA	NA	36	Neural	NA	NA	NA	Q96A29	SLC35C1	GDP-fucose transporter 1	6.08e-97	309	52.751	Q8BLX4	Slc35c1	GDP-fucose transporter 1	3.22e-104	309	52.427	F1QWP9	slc35d2	Solute carrier family 35 (UDP-GlcNAc/UDP-glucose transporter), member D2	0.000161	278	21.942	Q9VHT4	nac	GDP-fucose transporter 1	1.14e-96	315	47.302	Q18779
dd_Smed_v6_1266_0_1	NA	NA	NA	928	1.32805	6.2991	1.2e-06	1.02776	6.2991	0.000248153	2.51064	2.03885	1.2314	darkblue	Contig3864	1.09926	9.575	0.000448466	NA	9,11,20,21,24,27,30,37	Neural,Epidermal,Pharynx,Intestine	4	NA	NA	NA	NA	NA	NA	NA	NA	NA	NA	NA	NA	NA	NA	NA	NA	NA	NA	NA	NA	O76899	pck	EG:80H7.2 protein	7.03e-14	151	31.126	NA
dd_Smed_v6_12678_0_1	NA	RBCK1	RanBP-type and C3HC4-type zinc finger-containing protein 1	1231	2.25632	2.80568	0.01712	2.51056	2.80568	0.00869602	4.7777	5.69842	0.838425	dodgerblue	NA	NA	NA	NA	NA	NA	NA	NA	NA	NA	Q9BYM8	RBCK1	RanBP-type and C3HC4-type zinc finger-containing protein 1	1.98e-10	266	24.06	Q9WUB0	Rbck1	RanBP-type and C3HC4-type zinc finger-containing protein 1	8.44e-10	256	23.828	A9JTG5	rbck1	RanBP-type and C3HC4-type zinc finger-containing protein 1	6.84e-13	220	27.273	M9PCS0	LUBEL	Uncharacterized protein, isoform I	0.000131	208	22.596	NA
dd_Smed_v6_12719_0_1	NA	NA	NA	1537	3.12475	3.02764	3.1e-13	3.2114	3.02764	8.21e-14	8.72254	9.26248	0.941707	dodgerblue	NA	NA	NA	NA	NA	NA	NA	NA	NA	NA	NA	NA	NA	NA	NA	NA	NA	NA	NA	NA	NA	NA	NA	NA	NA	NA	NA	NA	NA	NA	NA	NA	NA	NA	Q9GRY3
dd_Smed_v6_12729_0_1	NA	NA	NA	481	5.56063	3.21014	1.86e-25	4.98409	3.21014	2.26e-21	47.1971	31.649	1.49127	darkblue	Contig7304	0.0220811	6.01486	0.523795	no_signal	NA	NA	NA	NA	NA	NA	NA	NA	NA	NA	NA	NA	NA	NA	NA	NA	NA	NA	NA	NA	NA	NA	NA	NA	NA	NA	NA	NA	NA	NA
dd_Smed_v6_12786_0_1	NA	NA	NA	2368	4.17253	2.14724	1.76e-09	3.84116	2.14724	2.78e-08	18.0325	14.3319	1.25821	darkblue	NA	NA	NA	NA	NA	NA	NA	NA	NA	NA	NA	NA	NA	NA	NA	NA	NA	NA	NA	NA	NA	NA	NA	NA	NA	NA	NA	NA	NA	NA	NA	NA	NA	NA	NA
dd_Smed_v6_12821_0_1	NA	SEC14L4	SEC14-like protein 4	1395	5.53358	2.33496	2.15e-14	5.71592	2.33496	4.63e-15	46.3205	52.5611	0.88127	dodgerblue	PL05003A1B05	0.707186	6.82015	0.0167254	NA	NA	NA	NA	NA	NA	Q9UDX3	SEC14L4	SEC14-like protein 4	1.73e-82	385	35.584	Q99J08	Sec14l2	SEC14-like protein 2	7.63e-83	379	35.356	Q803G8	sec14l1	SEC14-like 1 (S. cerevisiae)	5.5e-37	319	27.586	Q9VMD6	retm	Protein real-time	2.78e-37	356	26.685	Q22824
dd_Smed_v6_12832_0_1	NA	BEST3	Bestrophin-3	1059	3.77148	3.34614	2.41e-15	3.90483	3.34614	3.49e-16	13.6562	14.9786	0.911712	dodgerblue	Contig1818	1.4612	7.59574	0.000518824	NA	NA	NA	NA	NA	NA	Q8N1M1	BEST3	Bestrophin-3	1.69e-59	342	35.673	Q6H1V1	Best3	Bestrophin-3	1.84e-58	343	34.985	NA	NA	NA	NA	NA	NA	Q9V3J6	Best1	Bestrophin homolog	3.6e-61	345	33.623	Q17529
dd_Smed_v6_12848_0_1	NA	NA	NA	513	6.25124	4.56398	3.6e-30	6.44498	4.56398	1.67e-31	76.1747	87.1231	0.874335	dodgerblue	NA	NA	NA	NA	NA	30	Intestine	4	NA	NA	NA	NA	NA	NA	NA	NA	NA	NA	NA	NA	NA	NA	NA	NA	NA	NA	NA	NA	NA	NA	NA	NA	NA	NA	NA
dd_Smed_v6_1286_0_1	NA	MAP2K6	Dual specificity mitogen-activated protein kinase kinase 6	1478	1.63104	5.44632	1.48e-07	1.38472	5.44632	1.07e-05	3.09736	2.61121	1.18618	darkblue	Contig5250	0.653204	9.21758	0.00401029	NA	15	Cathepsin+ cell	NA	NA	NA	P52564	MAP2K6	Dual specificity mitogen-activated protein kinase kinase 6	1.85e-103	330	49.697	P70236	Map2k6	Dual specificity mitogen-activated protein kinase kinase 6	2.51e-102	305	51.475	Q9DGE0	map2k6	Dual specificity mitogen-activated protein kinase kinase 6	1.18e-99	287	51.916	O62602	lic	Licorne	3.09e-91	311	45.659	G5EDF7
dd_Smed_v6_1287_0_1	NA	NA	NA	379	5.78806	6.41364	2.02e-38	6.67576	6.41364	4.3e-47	55.256	102.236	0.540475	orange	NA	NA	NA	NA	NA	30	Intestine	4,7	NA	NA	NA	NA	NA	NA	NA	NA	NA	NA	NA	NA	NA	NA	NA	NA	NA	NA	NA	NA	NA	NA	NA	NA	NA	NA	NA
dd_Smed_v6_12870_0_1	NA	NA	NA	340	5.1286	3.16763	6.62e-12	5.05404	3.16763	1.4e-11	34.9834	33.2213	1.05304	darkblue	NA	NA	NA	NA	NA	NA	NA	NA	NA	NA	NA	NA	NA	NA	NA	NA	NA	NA	NA	NA	NA	NA	NA	NA	NA	NA	NA	NA	NA	NA	NA	NA	NA	NA	NA
dd_Smed_v6_12877_0_1	NA	NA	NA	1213	6.3682	2.69576	1.79e-14	6.66261	2.69576	2.17e-15	82.6072	101.308	0.815405	dodgerblue	Contig6044	1.05807	7.03278	0.00546095	NA	30	Intestine	4	NA	NA	NA	NA	NA	NA	NA	NA	NA	NA	NA	NA	NA	NA	NA	NA	NA	NA	NA	NA	NA	NA	NA	NA	NA	NA	NA
dd_Smed_v6_12890_0_1	NA	MAP3K13	Mitogen-activated protein kinase kinase kinase 13	1512	1.61182	2.90887	0.00269829	1.3892	2.90887	0.0124242	3.05637	2.61933	1.16685	darkblue	NA	NA	NA	NA	NA	NA	NA	NA	NA	NA	O43283	MAP3K13	Mitogen-activated protein kinase kinase kinase 13	5.77e-23	235	32.766	Q1HKZ5	Map3k13	Mitogen-activated protein kinase kinase kinase 13	1.18e-22	235	32.766	E7FH13	si:ch211-45c16.2	Mitogen-activated protein kinase kinase kinase	3.4e-23	235	33.191	D3DMF6	wnd	Mitogen-activated protein kinase kinase kinase	4.42e-23	236	33.051	O01775
dd_Smed_v6_12893_0_1	NA	FAM102A	Protein FAM102A	1206	3.45649	1.92209	6.32e-05	3.0819	1.92209	0.000388642	10.9776	8.46729	1.29647	darkblue	Contig3509	1.12155	6.97962	0.00635961	NA	NA	NA	NA	NA	NA	Q5T9C2	FAM102A	Protein FAM102A	4.77e-22	140	33.571	Q78T81	Fam102a	Protein FAM102A	5.53e-22	140	33.571	Q08CL0	fam102ab	Zgc:152955	1.22e-21	149	32.886	Q8SZ43	CG8671	CG8671, isoform B	2.89e-22	151	31.788	NA
dd_Smed_v6_12910_0_1	NA	NA	NA	567	2.72059	3.05001	2.36e-06	2.76327	3.05001	1.92e-06	6.59143	6.78935	0.970849	dodgerblue	NA	NA	NA	NA	NA	NA	NA	NA	NA	NA	NA	NA	NA	NA	NA	NA	Q8BMN4	Lmln	Leishmanolysin-like peptidase	1.3e-05	65	32.308	F1Q5N1	lmln	Leishmanolysin-like (metallopeptidase M8 family)	4.03e-05	64	34.375	Q9VH19	Invadolysin	Leishmanolysin-like peptidase	3.06e-06	63	36.508	NA
dd_Smed_v6_1294_0_1	NA	NA	NA	2888	1.8454	5.451	5.5e-10	1.52018	5.451	4.28e-07	3.59352	2.86828	1.25285	darkblue	Contig4582	0.915487	9.52315	0.000478294	NA	4,10,15,17,24,27,28,35,37,41	Cathepsin+ cell,Epidermal,Pharynx	7	pgrn+ parenchymal cells,psap+ parenchymal cells	Cathepsin+ b	NA	NA	NA	NA	NA	NA	NA	NA	NA	NA	NA	NA	NA	NA	NA	NA	NA	NA	NA	NA	NA	NA	NA	NA	NA
dd_Smed_v6_1296_0_1	NA	NA	NA	718	1.80281	8.07426	1.02e-05	1.65739	8.07426	6.03e-05	3.489	3.15446	1.10605	darkblue	PL04006B2G08	0.889656	8.01214	0.0266751	NA	4,6,15,17,19,22,30	Cathepsin+ cell,Intestine,Neoblast	NA	NA	Cathepsin+ b	NA	NA	NA	NA	NA	NA	NA	NA	NA	NA	NA	NA	NA	NA	NA	NA	NA	NA	NA	NA	NA	NA	NA	NA	NA
dd_Smed_v6_1297_0_1	NA	PEPD	Xaa-Pro dipeptidase	1713	1.54607	8.53	2.65e-06	1.32962	8.53	6.97e-05	2.92021	2.51336	1.16188	darkblue	Contig244	0.976436	8.27983	0.000581297	NA	10,17,24,28,29,30	Cathepsin+ cell,Epidermal,Protonephridia,Intestine	4	NA	NA	P12955	PEPD	Xaa-Pro dipeptidase	0	480	57.5	Q11136	Pepd	Xaa-Pro dipeptidase	0	478	56.485	Q7SXT5	pepd	Peptidase D	0	482	56.846	Q9VG79	Dip-C	Dipeptidase C, isoform A	2.19e-161	481	48.025	NA
dd_Smed_v6_1298_0_1	NA	NA	NA	1967	3.94642	5.45659	1.56e-32	3.76259	5.45659	4.61e-30	15.4167	13.5722	1.1359	darkblue	PL05002B1B07	1.39489	7.43196	0.00377557	NA	30	Intestine	4	NA	NA	NA	NA	NA	NA	NA	NA	NA	NA	NA	NA	NA	NA	NA	NA	NA	NA	NA	NA	NA	NA	NA	NA	NA	NA	NA
dd_Smed_v6_12983_0_1	NA	PRR5L	Proline-rich protein 5-like	1128	6.33125	3.07631	1.23e-21	6.13681	3.07631	1.36e-20	80.5188	70.3661	1.14428	darkblue	NA	NA	NA	NA	NA	30	Intestine	NA	NA	NA	Q6MZQ0	PRR5L	Proline-rich protein 5-like	1.19e-07	183	24.044	A2AVJ5	Prr5l	Proline-rich protein 5-like	1.25e-07	182	24.176	NA	NA	NA	NA	NA	NA	NA	NA	NA	NA	NA	NA	NA
dd_Smed_v6_12990_0_1	slc8a1	SLC8A1	Sodium/calcium exchanger 1	689	6.03549	3.27158	1.99e-18	5.50152	3.27158	5.24e-16	65.5941	45.3027	1.44791	darkblue	Contig4568	1.12438	7.43271	0.000157806	uniform	NA	NA	NA	NA	NA	P32418	SLC8A1	Sodium/calcium exchanger 1	7.5e-54	177	56.497	P70414	Slc8a1	Sodium/calcium exchanger 1	3.42e-54	177	56.497	Q32SG8	slc8a1a	Sodium calcium exchanger 1h	1.35e-53	177	57.627	A0A0B4K6E2	Calx	Na/Ca-exchange protein, isoform G	8.49e-47	173	58.382	P90858
dd_Smed_v6_1300_0_1	NA	NA	NA	1518	1.18051	6.01722	0.000118556	1.11692	6.01722	0.00033328	2.26657	2.16884	1.04506	darkblue	Contig2978	0.940965	8.35929	0.000347243	NA	10,17,24,28,30,31,37,39	Cathepsin+ cell,Epidermal,Intestine,Pharynx	4	NA	NA	NA	NA	NA	NA	NA	NA	NA	NA	NA	NA	NA	NA	NA	NA	NA	NA	NA	NA	NA	NA	NA	NA	NA	NA	NA
dd_Smed_v6_13035_0_1	NA	NA	NA	403	0.696975	7.25845	0.0126648	1.04242	7.25845	0.000109551	1.6211	2.05968	0.787065	dodgerblue	NA	NA	NA	NA	NA	NA	NA	NA	secretory 2,late epidermal progenitors 1,pigment	NA	NA	NA	NA	NA	NA	NA	NA	NA	NA	NA	NA	NA	NA	NA	NA	NA	NA	NA	NA	NA	NA	NA	NA	NA	NA
dd_Smed_v6_1306_0_1	NA	PLA2G15	Group XV phospholipase A2	1567	1.63783	6.52792	6.34e-08	1.30135	6.52792	2.35e-05	3.11198	2.46459	1.26268	darkblue	Contig6532	2.10067	8.65579	0.000603953	NA	4,10,15,17,28,30,31,39,41,42	Cathepsin+ cell,Intestine	4,7	aqp+ parenchymal cells,psap+ parenchymal cells,glia	Cathepsin+ b	Q8NCC3	PLA2G15	Group XV phospholipase A2	8.3e-60	376	35.372	Q8VEB4	Pla2g15	Group XV phospholipase A2	1.44e-57	376	34.574	NA	NA	NA	NA	NA	NA	NA	NA	NA	NA	NA	NA	NA
dd_Smed_v6_1308_0_1	NA	TRAF2	TNF receptor-associated factor 2	3177	5.46237	7.38743	6.59e-57	5.24167	7.38743	1.76e-53	44.0897	37.8357	1.1653	darkblue	Contig4033	2.76581	8.99044	2.44e-05	NA	30	Intestine	4,7	phagocytes	Gut	Q12933	TRAF2	TNF receptor-associated factor 2	2.06e-10	296	23.311	P70191	Traf5	TNF receptor-associated factor 5	5.83e-12	322	23.292	Q6DEG0	traf3	TNF receptor-associated factor 3	1.72e-08	458	20.524	Q9XYQ9	Traf6	TNF-receptor-associated factor 2	8.35e-07	344	18.605	NA
dd_Smed_v6_131_0_1	novel	NA	NA	1404	7.36822	10.9637	3.92e-65	6.34993	10.9637	3.2e-53	165.217	81.568	2.02552	darkgreen	Contig3323	-0.39298	10.6343	0.152587	goblet	19	Intestine	8	goblet cells	NA	NA	NA	NA	NA	NA	NA	NA	NA	NA	NA	NA	NA	NA	NA	NA	NA	NA	NA	NA	NA	NA	NA	NA	NA	NA
dd_Smed_v6_13101_0_1	NA	NA	NA	984	0.993115	2.66382	0.0384754	1.40119	2.66382	0.00256927	1.99048	2.6412	0.753627	dodgerblue	NA	NA	NA	NA	NA	NA	NA	NA	NA	NA	NA	NA	NA	NA	NA	NA	NA	NA	NA	NA	NA	NA	NA	NA	NA	NA	NA	NA	NA	NA	NA	NA	NA	NA	NA
dd_Smed_v6_1311_0_1	NA	VAMP3	Vesicle-associated membrane protein 3	553	2.64042	5.09845	5.54e-13	2.58472	5.09845	1.86e-12	6.23511	5.999	1.03936	darkblue	Contig3395	2.1577	9.62302	6.8e-05	no_signal	10,17,24,28,30	Cathepsin+ cell,Epidermal,Intestine	4	NA	NA	Q15836	VAMP3	Vesicle-associated membrane protein 3	2.66e-15	78	41.026	P63024	Vamp3	Vesicle-associated membrane protein 3	3.94e-15	76	42.105	Q6IQK3	vamp3	Vesicle-associated membrane protein 3 (Cellubrevin)	8.34e-16	68	45.588	M9PDW0	nSyb	Neuronal synaptobrevin, isoform K	5.27e-13	65	41.538	O02495
dd_Smed_v6_13139_0_1	NA	CTSS	Cathepsin S	1126	4.25723	4.1069	2e-17	4.35875	4.1069	4.97e-18	19.1229	20.517	0.932048	dodgerblue	NA	NA	NA	NA	NA	NA	NA	NA	NA	NA	P25774	CTSS	Cathepsin S	8.75e-72	316	41.456	P55097	Ctsk	Cathepsin K	3.28e-76	330	40.303	Q6DHT0	ctsl.1	Cathepsin L.1	3.37e-81	327	41.59	Q95029	Cp1	Cathepsin L	1.71e-83	320	42.812	O45734
dd_Smed_v6_1315_0_1	NA	ETFB	Electron transfer flavoprotein subunit beta	931	1.01108	6.33721	0.000256654	0.703386	6.33721	0.0168675	2.01542	1.62832	1.23773	darkblue	NA	NA	NA	NA	NA	6,22	Intestine,Neoblast	NA	NA	NA	P38117	ETFB	Electron transfer flavoprotein subunit beta	7.01e-122	255	65.098	Q9DCW4	Etfb	Electron transfer flavoprotein subunit beta	4.07e-121	252	65.079	F1R9Y9	etfb	Electron-transfer-flavoprotein, beta polypeptide	1.73e-110	252	65.476	Q0KHZ6	CG7834	CG7834, isoform A	1.67e-115	251	68.526	Q9TXI4
dd_Smed_v6_13164_0_1	NA	DHCR24	Delta(24)-sterol reductase	1644	5.28283	3.15018	2.09e-15	4.94456	3.15018	6.76e-14	38.9306	30.7935	1.26425	darkblue	NA	NA	NA	NA	NA	NA	NA	NA	NA	NA	Q15392	DHCR24	Delta(24)-sterol reductase	0	514	54.864	Q8VCH6	Dhcr24	Delta(24)-sterol reductase	0	514	54.669	F1QUM4	dhcr24	24-dehydrocholesterol reductase	0	514	54.086	NA	NA	NA	NA	NA	NA	O17397
dd_Smed_v6_132_0_1	NA	NA	NA	433	4.85481	10.1568	7.33e-35	5.29364	10.1568	1.2e-39	28.9364	39.2234	0.737731	dodgerblue	NA	NA	NA	NA	NA	19,30	Intestine	5	goblet cells	NA	NA	NA	NA	NA	NA	NA	NA	NA	NA	NA	NA	NA	NA	NA	NA	NA	NA	NA	NA	NA	NA	NA	NA	NA	NA
dd_Smed_v6_1322_0_1	NA	MAPRE1	Microtubule-associated protein RP/EB family member 1	1760	1.39987	7.12935	2.85e-05	1.20053	7.12935	0.000434258	2.63878	2.29824	1.14817	darkblue	Contig2028	0.58268	8.42947	0.00227069	NA	NA	NA	NA	NA	NA	Q15691	MAPRE1	Microtubule-associated protein RP/EB family member 1	9.81e-87	318	45.283	Q61166	Mapre1	Microtubule-associated protein RP/EB family member 1	3.32e-90	318	46.541	Q6NUY9	mapre1b	Microtubule-associated protein, RP/EB family, member 1	1.87e-82	323	44.582	Q7JZD3	Eb1	Eb1, isoform A	3.65e-86	325	45.846	Q9GRZ1
dd_Smed_v6_1325_0_1	zmym1	ZMYM1	Zinc finger MYM-type protein 1	3566	3.87985	5.6238	1.68e-25	4.03338	5.6238	4.2e-27	14.7215	16.3745	0.899048	dodgerblue	Contig6015	1.22045	8.02936	0.00361635	uniform subset	13,30	Muscle,Intestine	4	NA	NA	Q5SVZ6	ZMYM1	Zinc finger MYM-type protein 1	0.000156	70	37.143	NA	NA	NA	NA	NA	NA	NA	NA	NA	NA	NA	NA	NA	NA	NA	NA	NA	NA	NA
dd_Smed_v6_13270_0_1	NA	RGR	RPE-retinal G protein-coupled receptor	1179	5.04358	1.47859	0.000383086	4.75948	1.47859	0.000846531	32.9814	27.086	1.21766	darkblue	PL05016A1E04	-0.107403	6.21041	0.478556	NA	NA	NA	NA	NA	NA	P47804	RGR	RPE-retinal G protein-coupled receptor	2.18e-05	139	28.058	NA	NA	NA	NA	NA	NA	F1Q955	ptger4a	Prostaglandin E receptor 4 (subtype EP4) a	0.000129	138	29.71	NA	NA	NA	NA	NA	NA	NA
dd_Smed_v6_1328_0_1	NA	NA	NA	1286	1.29284	8.02843	1.36e-05	1.31352	8.02843	1.12e-05	2.45011	2.48547	0.985772	dodgerblue	Contig1505	2.57739	9.80464	3.43e-05	NA	1,7,10,12,16,18,30	Neural,Muscle,Cathepsin+ cell,Parapharyngeal,Intestine	4	pgrn+ parenchymal cells,ldlrr-1+ parenchymal cells	NA	NA	NA	NA	NA	NA	NA	NA	NA	NA	NA	NA	NA	NA	NA	NA	NA	NA	NA	NA	NA	NA	NA	NA	NA	NA
dd_Smed_v6_13288_0_1	NA	DSTYK	Dual serine/threonine and tyrosine protein kinase	918	3.99397	1.31054	0.00189382	4.37393	1.31054	0.000843559	15.9332	20.7341	0.768456	dodgerblue	NA	NA	NA	NA	NA	NA	NA	NA	NA	NA	Q6XUX3	DSTYK	Dual serine/threonine and tyrosine protein kinase	3.28e-39	165	40	Q6XUX1	Dstyk	Dual serine/threonine and tyrosine protein kinase	3.3e-39	165	40.606	Q4VSN1	dstyk	Dual serine/threonine and tyrosine protein kinase	6.09e-41	172	40.698	Q9VEN3	GckIII	FI20177p1	1.31e-21	175	34.857	Q9XTC6
dd_Smed_v6_13292_0_1	NA	NID2	Nidogen-2	2444	0.411298	2.58267	0.624758	3.03246	2.58267	4.65e-06	1.32988	8.18203	0.162537	darkorange	Contig1612	-0.195867	6.26458	0.219987	NA	NA	NA	NA	NA	NA	Q14112	NID2	Nidogen-2	5.25e-07	112	29.464	O88322	Nid2	Nidogen-2	5.28e-07	112	29.464	A0A193GP06	tg	Thyroglobulin	2.5e-09	106	32.075	Q9VCR3	Cow	Proteoglycan Cow	0.000334	50	42	NA
dd_Smed_v6_13315_0_1	NA	NA	NA	627	2.29118	3.14702	0.00273929	2.15875	3.14702	0.00559464	4.89457	4.46528	1.09614	darkblue	NA	NA	NA	NA	NA	NA	NA	NA	NA	NA	NA	NA	NA	NA	NA	NA	NA	NA	NA	NA	NA	NA	NA	NA	NA	NA	NA	NA	NA	NA	NA	NA	NA	NA	NA
dd_Smed_v6_1333_0_1	cg10527	NA	NA	825	5.59033	4.68589	7.19e-14	5.60968	4.68589	7.12e-14	48.179	48.8295	0.986677	dodgerblue	Contig1106	3.54494	10.6598	2.65e-05	uniform	30	Intestine	4	NA	NA	NA	NA	NA	NA	NA	NA	NA	NA	NA	NA	NA	NA	NA	NA	NA	NA	NA	NA	Q9W2M4	CG10527	Uncharacterized protein	9.27e-13	132	31.061	NA
dd_Smed_v6_1334_0_1	NA	BPNT1	3'(2'),5'-bisphosphate nucleotidase 1	1370	2.25513	6.19294	4.39e-17	1.95038	6.19294	3.66e-13	4.77377	3.86477	1.2352	darkblue	Contig4084	1.07087	8.64174	0.000231671	NA	17,30	Cathepsin+ cell,Intestine	NA	NA	NA	O95861	BPNT1	3'(2'),5'-bisphosphate nucleotidase 1	1.54e-77	311	41.801	Q9Z0S1	Bpnt1	3'(2'),5'-bisphosphate nucleotidase 1	1.94e-75	314	41.401	Q6DGB2	impa1	Inositol(Myo)-1(Or 4)-monophosphatase 1	1.65e-09	285	25.614	Q9VYF2	CG15743	Putative inositol monophosphatase 3	8.07e-28	307	30.619	Q19420
dd_Smed_v6_1335_0_1	NA	CHMP2A	Charged multivesicular body protein 2a	827	1.27776	6.55855	7.71e-06	1.22497	6.55855	2.16e-05	2.42462	2.33751	1.03727	darkblue	Contig2278	1.0801	7.27253	0.000215767	NA	NA	NA	NA	NA	NA	O43633	CHMP2A	Charged multivesicular body protein 2a	7.33e-84	191	69.11	Q9DB34	Chmp2a	Charged multivesicular body protein 2a	7.32e-84	191	69.11	Q7ZW25	chmp2a	Charged multivesicular body protein 2a	9.79e-86	191	71.728	Q9VBI3	Vps2	RH72336p	1.14e-77	191	63.874	Q9U2F6
dd_Smed_v6_1339_0_1	NA	ALDH2	Aldehyde dehydrogenase, mitochondrial	1750	2.4886	7.2243	1.28e-12	2.39515	7.2243	9.42e-12	5.61234	5.26034	1.06692	darkblue	Contig2274	0.683624	8.50997	0.00117931	NA	10,24,25,27,30,37	Cathepsin+ cell,Epidermal,Pharynx,Intestine	4,7	NA	NA	P05091	ALDH2	Aldehyde dehydrogenase, mitochondrial	0	497	66.398	P47738	Aldh2	Aldehyde dehydrogenase, mitochondrial	0	504	66.071	Q6TH48	aldh2.2	Mitochondrial aldehyde dehydrogenase 2 family	0	521	62.764	Q9VLC5	Aldh	Aldehyde dehydrogenase	0	499	60.521	Q20780
dd_Smed_v6_1346_0_1	NA	HMBS	Porphobilinogen deaminase	1425	2.57382	6.24524	3.17e-18	2.50316	6.24524	2.59e-17	5.95383	5.66925	1.0502	darkblue	Contig3214	0.304257	8.12282	0.23466	NA	6,19,30	Intestine	7	NA	NA	P08397	HMBS	Porphobilinogen deaminase	1.26e-95	389	43.702	P22907	Hmbs	Porphobilinogen deaminase	1.76e-95	390	44.615	F1R6A1	hmbsb	Hydroxymethylbilane synthase, b	1.29e-90	306	48.693	Q9W0G4	l(3)02640	FI03834p	3.05e-74	340	42.941	NA
dd_Smed_v6_13461_0_1	NA	NA	NA	2928	1.50573	3.10283	0.00138072	1.81557	3.10283	0.000107812	2.83968	3.51997	0.806732	dodgerblue	NA	NA	NA	NA	NA	31	Cathepsin+ cell	NA	NA	NA	NA	NA	NA	NA	NA	NA	NA	NA	NA	NA	NA	NA	NA	NA	NA	NA	NA	NA	NA	NA	NA	NA	NA	NA	NA
dd_Smed_v6_1347_0_1	novel	NA	NA	542	6.37392	6.5285	3.27e-27	6.67666	6.5285	5.59e-29	82.9355	102.3	0.810711	dodgerblue	Contig4599	-0.336516	6.79357	0.185018	uniform	30	Intestine	4,7	phagocytes	NA	NA	NA	NA	NA	NA	NA	NA	NA	NA	NA	NA	NA	NA	NA	NA	NA	NA	NA	NA	NA	NA	NA	NA	NA	NA
dd_Smed_v6_1350_0_1	NA	NA	NA	1621	1.30374	5.13192	0.000139216	1.36041	5.13192	7.79e-05	2.46868	2.56758	0.961478	dodgerblue	NA	NA	NA	NA	NA	2,6,19,22	Epidermal,Intestine,Neoblast	3	NA	NA	NA	NA	NA	NA	NA	NA	NA	NA	NA	NA	NA	NA	NA	NA	NA	NA	NA	NA	NA	NA	NA	NA	NA	NA	NA
dd_Smed_v6_13509_0_1	NA	HTR2A	5-hydroxytryptamine receptor 2A	1885	1.966	2.64935	0.0042989	1.18699	2.64935	0.115509	3.90684	2.27678	1.71595	green	NA	NA	NA	NA	NA	NA	NA	NA	NA	NA	P28223	HTR2A	5-hydroxytryptamine receptor 2A	1.55e-13	187	29.412	P35363	Htr2a	5-hydroxytryptamine receptor 2A	2.21e-13	187	29.412	F1RCX7	htr2aa	5-hydroxytryptamine (serotonin) receptor 2A, genome duplicate a	5.1e-13	174	28.161	Q8INQ6	5-HT2B	5-hydroxytryptamine (Serotonin) receptor 2B, isoform D	4.49e-13	171	29.24	O17470
dd_Smed_v6_1351_0_1	NA	PRCP	Lysosomal Pro-X carboxypeptidase	1812	2.96403	5.16942	1.41e-11	2.94715	5.16942	2.14e-11	7.80301	7.71223	1.01177	darkblue	Contig1592	2.60844	10.2491	2.61e-05	NA	10,17,28,30	Cathepsin+ cell,Intestine	4,7	NA	NA	P42785	PRCP	Lysosomal Pro-X carboxypeptidase	2.63e-120	450	42.444	Q7TMR0	Prcp	Lysosomal Pro-X carboxypeptidase	1.5e-122	444	43.919	Q6DG46	prcp	Prolylcarboxypeptidase (Angiotensinase C)	5.65e-115	444	43.919	Q9VIM0	CG2493	CG2493, isoform A	4.9e-112	450	40.889	P34676
dd_Smed_v6_1354_0_1	NA	SNX3	Sorting nexin-3	656	1.99378	6.90044	5.36e-11	1.9364	6.90044	2.19e-10	3.98278	3.8275	1.04057	darkblue	Contig7280	1.04545	8.14359	0.00774402	NA	10,28,29,30,31	Cathepsin+ cell,Protonephridia,Intestine	4	NA	NA	O60493	SNX3	Sorting nexin-3	7.23e-82	161	68.323	O70492	Snx3	Sorting nexin-3	1.35e-80	161	67.081	Q3B7E7	snx3	Sorting nexin 3	1.37e-79	160	66.875	Q9VG51	Snx3	RE52028p	3.68e-85	159	72.327	Q9XW41
dd_Smed_v6_1358_0_1	NA	COMMD5	COMM domain-containing protein 5	971	1.26103	5.70303	0.000650155	1.05405	5.70303	0.00586429	2.39666	2.07635	1.15427	darkblue	Contig1531	1.15059	8.29897	0.000237502	NA	NA	NA	NA	NA	NA	Q9GZQ3	COMMD5	COMM domain-containing protein 5	7.57e-12	149	23.49	Q8R395	Commd5	COMM domain-containing protein 5	1.45e-08	163	23.313	Q6DC11	commd5	Zgc:101132	1.89e-09	66	36.364	NA	NA	NA	NA	NA	NA	NA
dd_Smed_v6_1362_0_1	NA	PRKAR2B	Protein kinase, cAMP-dependent, regulatory, type II, beta	1326	5.98963	6.96283	9.96e-68	5.96612	6.96283	5.18e-67	63.5414	62.5147	1.01642	darkblue	Contig2024	2.48642	9.76396	7.46e-05	NA	6,19,30	Intestine	4,7	phagocytes	NA	Q6DHZ2	PRKAR2B	Protein kinase, cAMP-dependent, regulatory, type II, beta	9.07e-65	403	32.258	P12367	Prkar2a	cAMP-dependent protein kinase type II-alpha regulatory subunit	7.37e-64	390	33.846	A9C3T0	prkar2aa	Protein kinase, cAMP-dependent, regulatory, type II, alpha A	5.11e-64	386	33.679	P81900	Pka-R2	cAMP-dependent protein kinase type II regulatory subunit	2.79e-82	369	40.108	P30625
dd_Smed_v6_1364_0_1	NA	UBQLN1	Ubiquilin-1	1843	1.49624	5.86421	1.3e-07	0.979543	5.86421	0.000870128	2.82106	1.97184	1.43067	darkblue	Contig2009	0.769993	8.47731	0.00158332	NA	NA	NA	NA	NA	NA	Q9UMX0	UBQLN1	Ubiquilin-1	3.68e-89	450	39.778	Q8R317	Ubqln1	Ubiquilin-1	5.22e-90	455	40.22	F1QBF2	bag6l	BCL2-associated athanogene 6,-like	0.00027	74	27.027	Q9VWD9	Ubqn	LD38919p	1.28e-86	431	37.355	NA
dd_Smed_v6_1365_0_1	NA	M6PR	Cation-dependent mannose-6-phosphate receptor	1144	1.94252	7.611	1.89e-11	1.8519	7.611	1.83e-10	3.84377	3.60975	1.06483	darkblue	Contig1301	2.127	9.74005	3.81e-05	NA	15,17,30	Cathepsin+ cell,Intestine	4	NA	Cathepsin+ b	P20645	M6PR	Cation-dependent mannose-6-phosphate receptor	5.5e-24	203	31.034	P24668	M6pr	Cation-dependent mannose-6-phosphate receptor	1.82e-23	203	31.527	Q6P032	m6pr	MPR46	6.42e-19	237	30.38	NA	NA	NA	NA	NA	NA	NA
dd_Smed_v6_1369_0_1	NA	ATP6V1E1	ATPase, H+ transporting, lysosomal 31kDa, V1 subunit E isoform 1	1160	2.27974	7.82395	6.34e-16	2.02564	7.82395	6.94e-13	4.8559	4.07174	1.19259	darkblue	Contig208	1.84445	8.63963	0.000407098	NA	17,30	Cathepsin+ cell,Intestine	4	NA	NA	Q53Y06	ATP6V1E1	ATPase, H+ transporting, lysosomal 31kDa, V1 subunit E isoform 1	1.98e-73	226	49.558	P50518	Atp6v1e1	V-type proton ATPase subunit E 1	5.17e-74	226	50	Q6NWK4	atp6v1e1b	ATPase, H+-transporting, lysosomal, V1 subunit E1b	9.8e-82	226	53.097	P54611	Vha26	V-type proton ATPase subunit E	1.01e-80	226	53.54	Q95X44
dd_Smed_v6_13694_0_1	NA	NA	NA	897	8.10665	3.03495	2.05e-23	7.66803	3.03495	1.81e-21	275.641	203.38	1.3553	darkblue	Contig1846	2.40312	7.68056	0.00057209	NA	30	Intestine	4	NA	NA	NA	NA	NA	NA	NA	NA	NA	NA	NA	NA	NA	NA	NA	NA	NA	NA	NA	NA	NA	NA	NA	NA	NA	NA	NA
dd_Smed_v6_13709_0_1	NA	NA	NA	2006	7.21898	3.68028	1.72e-29	7.4522	3.68028	6.9e-31	148.98	175.12	0.850734	dodgerblue	PL06009B2A06	0.214233	6.76894	0.438016	NA	30	Intestine	4	NA	NA	NA	NA	NA	NA	NA	NA	NA	NA	NA	NA	NA	NA	NA	NA	NA	NA	NA	NA	NA	NA	NA	NA	NA	NA	NA
dd_Smed_v6_1371_0_1	NA	DSTYK	Dual serine/threonine and tyrosine protein kinase	3014	2.72298	6.3565	1.04e-19	2.68061	6.3565	3.92e-19	6.60233	6.41125	1.0298	darkblue	Contig5023	2.33855	9.39682	2.29e-05	NA	10,17,28,30,39,42	Cathepsin+ cell,Intestine	4,7	NA	Cathepsin+ b	Q6XUX3	DSTYK	Dual serine/threonine and tyrosine protein kinase	1.23e-52	536	29.104	Q6XUX1	Dstyk	Dual serine/threonine and tyrosine protein kinase	8.37e-53	536	28.918	Q4VSN1	dstyk	Dual serine/threonine and tyrosine protein kinase	2.13e-50	547	28.154	Q24213	Pak	p21-activated protein kinase 1 Dpak1	1.32e-18	245	30.204	Q22146
dd_Smed_v6_1373_1_1	NA	PDCD6IP	Programmed cell death 6-interacting protein	2908	1.29385	6.07522	3e-05	1.18267	6.07522	0.000170025	2.45181	2.26997	1.08011	darkblue	Contig4912	1.2147	9.01283	0.000390024	NA	10,17,20,21	Cathepsin+ cell,Neural	NA	NA	NA	Q8WUM4	PDCD6IP	Programmed cell death 6-interacting protein	2.53e-169	740	37.973	Q80Y09	Pdcd6ip	Pdcd6ip protein	3.41e-169	722	38.366	B8JLR1	pdcd6ip	Programmed cell death 6-interacting protein	4.75e-170	741	37.787	Q9VB05	ALiX	ALG-2 interacting protein X	0	775	39.097	P34552
dd_Smed_v6_13739_0_1	NA	NA	NA	1337	1.62558	3.56346	2.04e-05	1.11334	3.56346	0.00532519	3.08566	2.16346	1.42626	darkblue	NA	NA	NA	NA	NA	NA	NA	NA	NA	NA	NA	NA	NA	NA	NA	NA	Q9D850	Tmem68	Transmembrane protein 68	1.16e-63	252	42.857	NA	NA	NA	NA	NA	NA	NA	NA	NA	NA	NA	NA	NA
dd_Smed_v6_13810_0_1	NA	NA	NA	552	5.61957	2.03125	1.13e-09	6.01959	2.03125	1.31e-10	49.1652	64.8748	0.757848	dodgerblue	NA	NA	NA	NA	NA	NA	NA	NA	NA	NA	NA	NA	NA	NA	NA	NA	NA	NA	NA	NA	NA	NA	NA	NA	NA	NA	NA	NA	NA	NA	NA	NA	NA	NA	NA
dd_Smed_v6_13811_0_1	NA	TRAF6	TNF receptor-associated factor 6	630	7.36062	2.48842	6.39e-20	7.16265	2.48842	4.63e-19	164.349	143.276	1.14708	darkblue	PL08008A1G07	1.72056	7.43695	0.00164875	NA	NA	NA	NA	NA	NA	Q9Y4K3	TRAF6	TNF receptor-associated factor 6	6.85e-11	167	28.144	P70196	Traf6	TNF receptor-associated factor 6	6.58e-11	167	28.144	Q6IWL4	traf6	TNF receptor-associated factor 6	8.17e-10	151	29.139	Q9XYQ9	Traf6	TNF-receptor-associated factor 2	4.22e-05	64	34.375	G5EG80
dd_Smed_v6_1388_0_1	NA	NA	NA	722	2.33524	5.45361	1.72e-12	2.51404	5.45361	4.06e-14	5.04633	5.71218	0.883435	dodgerblue	Contig7504	1.66937	8.66799	0.000734947	NA	10,28,30,39	Cathepsin+ cell,Intestine	4	NA	NA	NA	NA	NA	NA	NA	NA	NA	NA	NA	NA	NA	NA	NA	NA	NA	NA	NA	NA	NA	NA	NA	NA	NA	NA	NA
dd_Smed_v6_13906_1_1	NA	SRR	Serine racemase	1158	2.31077	3.44641	9.01e-08	2.28928	3.44641	1.34e-07	4.96149	4.88811	1.01501	darkblue	NA	NA	NA	NA	NA	NA	NA	NA	NA	NA	Q9GZT4	SRR	Serine racemase	4.43e-60	325	38.154	Q9QZX7	Srr	Serine racemase	2.67e-57	319	37.618	A9JT04	cbsa	Cystathionine beta-synthase	0.000345	202	25.248	NA	NA	NA	NA	NA	NA	O45679
dd_Smed_v6_1391_0_1	NA	ATP6V1D	V-type proton ATPase subunit D	1079	1.64139	7.20724	8.42e-08	1.55381	7.20724	4.77e-07	3.11967	2.9359	1.06259	darkblue	Contig5665	1.37	9.57585	0.000324066	NA	30	Intestine	4	NA	NA	Q9Y5K8	ATP6V1D	V-type proton ATPase subunit D	2.82e-96	203	72.906	P57746	Atp6v1d	V-type proton ATPase subunit D	5.01e-96	203	72.906	NA	NA	NA	NA	NA	NA	Q9V7D2	Vha36-1	V-type proton ATPase subunit D 1	1.83e-93	203	71.921	P34462
dd_Smed_v6_1394_0_1	NA	NA	NA	268	4.65089	4.1669	1.36e-21	4.51481	4.1669	1.45e-20	25.1221	22.8609	1.09891	darkblue	Contig277	0.491939	9.63279	0.0213951	NA	6,22,30,31	Intestine,Neoblast,Cathepsin+ cell	0,7	phagocytes,pigment	NA	NA	NA	NA	NA	NA	NA	NA	NA	NA	NA	NA	NA	NA	NA	NA	NA	NA	NA	NA	NA	NA	NA	NA	NA	NA
dd_Smed_v6_1395_0_1	NA	RNF34	E3 ubiquitin-protein ligase RNF34	1201	1.74214	6.95139	4.24e-07	1.59229	6.95139	4.66e-06	3.34531	3.01527	1.10946	darkblue	Contig4849	1.78567	8.93184	9.98e-05	NA	20,24,30,33	Neural,Epidermal,Intestine	4	NA	NA	Q969K3	RNF34	E3 ubiquitin-protein ligase RNF34	6.07e-10	101	32.673	Q99KR6	Rnf34	E3 ubiquitin-protein ligase RNF34	8.79e-10	101	32.673	F1QKD6	zgc:171740	Zgc:171740	2.69e-08	108	30.556	Q8T0T5	CG17019	GH09066p	8.71e-09	101	34.653	NA
dd_Smed_v6_13970_0_1	NA	NA	NA	404	5.7282	1.51342	1.96e-07	6.74031	1.51342	3e-09	53.0103	106.914	0.495822	darkorange	NA	NA	NA	NA	NA	NA	NA	NA	NA	NA	NA	NA	NA	NA	NA	NA	NA	NA	NA	NA	NA	NA	NA	NA	NA	NA	NA	NA	NA	NA	NA	NA	NA	NA	NA
dd_Smed_v6_13997_0_1	NA	NA	NA	2463	2.88866	3.11379	8.03e-12	3.24233	3.11379	2.64e-14	7.40581	9.4632	0.782591	dodgerblue	NA	NA	NA	NA	NA	10,16,19,34	Cathepsin+ cell,Muscle,Intestine,Neural	5	NA	NA	NA	NA	NA	NA	NA	NA	NA	NA	NA	NA	NA	NA	NA	NA	NA	NA	NA	NA	NA	NA	NA	NA	NA	NA	NA
dd_Smed_v6_14_0_1	novel	NA	NA	601	3.47354	10.0373	1.14e-19	3.72594	10.0373	5.62e-22	11.1081	13.2319	0.839495	dodgerblue	Contig5797	-0.512071	11.8303	0.16027	basal	10,11,12,19,35	Cathepsin+ cell,Epidermal,Parapharyngeal,Intestine	2,5	late epidermal progenitors 2,epidermis DVb,goblet cells	Cluster 11	NA	NA	NA	NA	NA	NA	NA	NA	NA	NA	NA	NA	NA	NA	NA	NA	NA	NA	NA	NA	NA	NA	NA	NA	NA
dd_Smed_v6_1401_0_1	novel	NA	NA	690	1.04932	6.20915	0.0150716	3.41223	6.20915	6.87e-16	2.06956	10.6459	0.194399	darkorange	Contig3622	-0.804492	6.69882	0.08804	goblet	7,13,14,15,16,17,25,27,37	Muscle,Cathepsin+ cell,Pharynx	NA	NA	Cathepsin+ b	NA	NA	NA	NA	NA	NA	NA	NA	NA	NA	NA	NA	NA	NA	NA	NA	NA	NA	NA	NA	NA	NA	NA	NA	NA
dd_Smed_v6_14029_0_1	NA	MCPH1	Microcephalin	3056	0.75969	3.67101	0.048739	1.16466	3.67101	0.00155079	1.69313	2.2418	0.755255	dodgerblue	NA	NA	NA	NA	NA	NA	NA	NA	NA	NA	Q8NEM0	MCPH1	Microcephalin	7.01e-10	190	26.842	Q7TT79	Mcph1	Microcephalin	4.57e-08	75	37.333	Q1RM66	mcph1	Zgc:136403	1.23e-08	185	24.865	A5YTR9	MCPH1	IP08064p	5.7e-09	76	35.526	NA
dd_Smed_v6_14059_0_1	NA	EIF4G1	Eukaryotic translation initiation factor 4 gamma 1	1238	11.0815	2.78129	8.11e-31	10.973	2.78129	3.16e-30	2167.1	2010.02	1.07815	darkblue	Contig728	0.540474	5.86965	0.0142639	NA	NA	NA	NA	NA	NA	E7EUU4	EIF4G1	Eukaryotic translation initiation factor 4 gamma 1	6.32e-12	246	20.732	Q80XI3	Eif4g3	Eukaryotic translation initiation factor 4 gamma 3	3.24e-12	246	21.951	A1L1W1	eif4g1a	Zgc:158450	3.93e-12	241	23.651	A1Z968	NAT1	NAT1, isoform D	3.7e-14	254	24.409	NA
dd_Smed_v6_1406_0_1	novel	NA	NA	625	7.46465	7.36268	3.91e-17	7.68245	7.36268	1.01e-17	176.637	205.423	0.859872	dodgerblue	Contig2655	2.86466	9.18277	8.47e-05	uniform	6,30	Intestine	4,7	phagocytes	NA	NA	NA	NA	NA	NA	NA	NA	NA	NA	NA	NA	NA	NA	NA	NA	NA	NA	NA	NA	NA	NA	NA	NA	NA	NA
dd_Smed_v6_14070_0_1	NA	NA	NA	558	7.96506	1.5535	7.07e-12	7.42731	1.5535	1.23e-10	249.875	172.125	1.45171	darkblue	NA	NA	NA	NA	NA	NA	NA	5	NA	NA	NA	NA	NA	NA	NA	NA	NA	NA	NA	NA	NA	NA	NA	NA	NA	NA	NA	NA	NA	NA	NA	NA	NA	NA	NA
dd_Smed_v6_14096_0_1	NA	NA	NA	1230	4.26178	1.4294	0.00166446	4.7657	1.4294	0.000589513	19.1834	27.2031	0.705189	dodgerblue	NA	NA	NA	NA	NA	NA	NA	NA	NA	NA	NA	NA	NA	NA	NA	NA	NA	NA	NA	NA	NA	NA	NA	NA	NA	NA	NA	NA	NA	NA	NA	NA	NA	NA	NA
dd_Smed_v6_1411_0_1	NA	ACAA2	3-ketoacyl-CoA thiolase, mitochondrial	1421	1.50127	5.63421	6.82e-06	1.38158	5.63421	4.25e-05	2.83092	2.60554	1.0865	darkblue	Contig6509	0.438903	8.9289	0.0841874	NA	6,19,28	Intestine,Cathepsin+ cell	7	NA	NA	P42765	ACAA2	3-ketoacyl-CoA thiolase, mitochondrial	0	395	64.051	Q8BWT1	Acaa2	3-ketoacyl-CoA thiolase, mitochondrial	6.04e-180	395	62.785	B0S5C5	acaa2	Acetyl-CoA acyltransferase 2	8.51e-176	397	62.469	Q9VL70	yip2	HL08109p	4.94e-153	398	55.779	O45552
dd_Smed_v6_1412_0_1	cpa2	CPA2	Carboxypeptidase A2	1385	7.92317	8.31702	2.11e-44	4.34064	8.31702	9.9e-19	242.724	20.2611	11.9798	darkgreen	Contig1711	-1.05514	8.06015	0.00396664	goblet	NA	NA	NA	NA	NA	P48052	CPA2	Carboxypeptidase A2	1.39e-71	422	35.071	Q504N0	Cpa2	Carboxypeptidase A2	7.73e-68	417	35.012	Q6PHV5	cpa5	Carboxypeptidase A5	2.18e-65	408	32.843	Q961J8	CT14378	CG8560, isoform A	4.85e-66	419	32.697	Q9BL88
dd_Smed_v6_14195_0_1	NA	NA	NA	1943	4.61537	3.3733	7.81e-23	4.80678	3.3733	2.4e-24	24.5112	27.9888	0.875749	dodgerblue	Contig3521	1.45769	6.58338	0.000303563	NA	15,16,24,34	Cathepsin+ cell,Muscle,Epidermal,Neural	5	NA	NA	NA	NA	NA	NA	NA	NA	NA	NA	NA	NA	NA	NA	NA	NA	NA	NA	NA	NA	NA	NA	NA	NA	NA	NA	NA
dd_Smed_v6_14241_0_1	NA	NA	NA	1188	2.24248	4.3394	8.83e-07	2.17099	4.3394	2.26e-06	4.73209	4.50331	1.0508	darkblue	NA	NA	NA	NA	NA	10,24,30	Cathepsin+ cell,Epidermal,Intestine	4	NA	NA	NA	NA	NA	NA	NA	NA	NA	NA	NA	NA	NA	NA	NA	NA	NA	NA	NA	NA	NA	NA	NA	NA	NA	NA	NA
dd_Smed_v6_14248_0_1	NA	NA	NA	1601	5.46684	2.53504	6.07e-14	5.03377	2.53504	3.02e-12	44.2267	32.758	1.3501	darkblue	NA	NA	NA	NA	NA	NA	NA	NA	NA	NA	NA	NA	NA	NA	NA	NA	NA	NA	NA	NA	NA	NA	NA	NA	NA	NA	NA	NA	NA	NA	NA	NA	NA	NA	NA
dd_Smed_v6_14273_0_1	NA	NA	NA	302	4.508	1.83335	1.7e-06	4.57656	1.83335	1.44e-06	22.7532	23.8606	0.953589	dodgerblue	NA	NA	NA	NA	NA	NA	NA	NA	NA	NA	NA	NA	NA	NA	NA	NA	NA	NA	NA	NA	NA	NA	NA	NA	NA	NA	NA	NA	NA	NA	NA	NA	NA	NA	NA
dd_Smed_v6_1433_0_1	NA	VAPA	Vesicle-associated membrane protein-associated protein A	912	1.51856	7.7989	1.04e-07	1.47597	7.7989	2.81e-07	2.86506	2.7817	1.02997	darkblue	Contig5553	1.6786	9.40112	0.000181975	NA	17,30	Cathepsin+ cell,Intestine	4	NA	NA	Q9P0L0	VAPA	Vesicle-associated membrane protein-associated protein A	2.35e-59	249	40.161	Q8BH80	Vapb	Putative uncharacterized protein	1.08e-58	243	42.387	Q6P2B0	vapb	VAMP (vesicle-associated membrane protein)-associated protein B and C	1.38e-57	247	40.081	Q7KVX5	Vap33	VAMP-associated protein of 33kDa ortholog A, isoform A	4.75e-35	130	46.923	O44782
dd_Smed_v6_14332_0_1	NA	UBA52	Ubiquitin A-52 residue ribosomal protein fusion product 1	413	5.08231	2.44723	3.41e-11	4.96319	2.44723	9.67e-11	33.8787	31.1938	1.08607	darkblue	NA	NA	NA	NA	NA	19	Intestine	2,5	NA	NA	Q3MIH3	UBA52	Ubiquitin A-52 residue ribosomal protein fusion product 1	2.42e-10	61	42.623	P62984	Uba52	Ubiquitin-60S ribosomal protein L40	2.66e-10	61	42.623	B0R193	ubb	Ubiquitin B	7.37e-11	61	42.623	P18101	RpL40	Ubiquitin-60S ribosomal protein L40	2.54e-10	61	42.623	P49632
dd_Smed_v6_1439_0_1	NA	TRAF6	TNF receptor-associated factor 6	1473	1.23262	5.68994	5.03e-06	1.01266	5.68994	0.000245124	2.34993	2.01763	1.1647	darkblue	Contig4173	0.469025	7.90418	0.0068361	NA	10,15,17,19,28,29,30,41,43	Cathepsin+ cell,Intestine,Protonephridia	NA	NA	NA	Q9Y4K3	TRAF6	TNF receptor-associated factor 6	1.19e-22	459	21.133	P70196	Traf6	TNF receptor-associated factor 6	6.11e-20	467	21.842	Q6DEG0	traf3	TNF receptor-associated factor 3	2.22e-17	416	24.76	Q9XYQ9	Traf6	TNF-receptor-associated factor 2	2.41e-11	356	19.663	G5EG80
dd_Smed_v6_14400_0_1	NA	ARHGAP20	Rho GTPase-activating protein 20	1863	3.82831	3.09889	7.6e-14	3.91525	3.09889	2.65e-14	14.2049	15.0872	0.94152	dodgerblue	NA	NA	NA	NA	NA	NA	NA	NA	NA	NA	Q9P2F6	ARHGAP20	Rho GTPase-activating protein 20	3.77e-07	131	31.298	Q6IFT4	Arhgap20	Rho GTPase-activating protein 20	9.94e-08	135	31.111	NA	NA	NA	NA	NA	NA	NA	NA	NA	NA	NA	NA	NA
dd_Smed_v6_1444_0_1	NA	WWP1	NEDD4-like E3 ubiquitin-protein ligase WWP1	2827	1.25274	7.4326	3.91e-06	1.26498	7.4326	3.6e-06	2.38294	2.40323	0.991556	dodgerblue	PL06005A1F12	0.416727	6.69075	0.0513693	NA	10,17,21,28,30	Cathepsin+ cell,Neural,Intestine	4	NA	Cathepsin+ b	Q9H0M0	WWP1	NEDD4-like E3 ubiquitin-protein ligase WWP1	0	589	58.913	Q8BZZ3	Wwp1	NEDD4-like E3 ubiquitin-protein ligase WWP1	0	589	58.913	X1WEK3	wwp1	WW domain-containing E3 ubiquitin protein ligase 1	0	599	57.763	Q9Y0H4	Su(dx)	E3 ubiquitin-protein ligase Su(dx)	0	615	57.073	Q95XU3
dd_Smed_v6_1447_0_1	NA	PIEZO2	Piezo-type mechanosensitive ion channel component 2	3240	2.73551	7.40994	1.6e-25	2.61011	7.40994	1.78e-23	6.65993	6.10551	1.09081	darkblue	Contig4398	2.57139	8.90881	0.00170001	NA	30	Intestine	4	NA	NA	Q9H5I5	PIEZO2	Piezo-type mechanosensitive ion channel component 2	5.13e-72	417	34.772	Q8CD54	Piezo2	Piezo-type mechanosensitive ion channel component 2	1.89e-70	418	34.928	E7FD74	piezo1	Piezo-type mechanosensitive ion channel component	5.57e-60	424	33.255	M9MSG8	Piezo	Piezo-type mechanosensitive ion channel component	2.03e-64	441	31.519	A0A061ACU2
dd_Smed_v6_1450_0_1	NA	RAP2C	Ras-related protein Rap-2c	1228	1.62275	6.24124	3.16e-07	1.61944	6.24124	3.93e-07	3.07961	3.07257	1.00229	darkblue	Contig6592	0.860635	7.13239	0.00696968	NA	30	Intestine	NA	NA	NA	Q9Y3L5	RAP2C	Ras-related protein Rap-2c	6.06e-49	177	46.328	Q8BU31	Rap2c	Ras-related protein Rap-2c	6.67e-49	177	46.328	Q6IQP4	rap1aa	RAP1A, member of RAS oncogene family	1.01e-47	186	44.086	P08645	R	Ras-like protein 3	1.39e-47	165	47.273	O17599
dd_Smed_v6_1451_0_1	NA	NA	NA	988	1.76544	7.13441	2.12e-09	1.54902	7.13441	1.92e-07	3.39977	2.92618	1.16185	darkblue	Contig1785	2.20389	11.2812	3.86e-05	NA	6,10,15,17,28,30,41	Intestine,Cathepsin+ cell	4	NA	NA	NA	NA	NA	NA	NA	NA	NA	NA	NA	NA	NA	NA	NA	NA	NA	NA	NA	NA	NA	NA	NA	NA	NA	NA	NA
dd_Smed_v6_1452_0_1	NA	ATP6V1H	V-type proton ATPase subunit H	1591	2.4074	5.71563	1.78e-14	2.19096	5.71563	3.14e-12	5.30517	4.56608	1.16187	darkblue	Contig5284	1.93985	9.96259	4.98e-05	NA	17,30	Cathepsin+ cell,Intestine	4	NA	NA	Q9UI12	ATP6V1H	V-type proton ATPase subunit H	5.79e-152	471	48.62	Q8BVE3	Atp6v1h	V-type proton ATPase subunit H	1.67e-153	471	48.832	Q6PC35	atp6v1h	ATPase, H+ transporting, lysosomal, V1 subunit H	6.28e-154	440	51.136	Q9V3J1	VhaSFD	V-type proton ATPase subunit H	7.48e-152	453	47.02	Q22494
dd_Smed_v6_1453_0_1	NA	ABHD4	Protein ABHD4	1537	1.01454	5.75976	0.00170753	1.17291	5.75976	0.000273031	2.02026	2.25466	0.896035	dodgerblue	PL05003B2G09	0.257913	7.13679	0.297047	NA	30	Intestine	NA	NA	NA	Q8TB40	ABHD4	Protein ABHD4	4.81e-87	352	41.193	Q9DBL9	Abhd5	1-acylglycerol-3-phosphate O-acyltransferase ABHD5	5.93e-76	349	40.401	NA	NA	NA	NA	NA	NA	Q5U191	CG1882	CG1882, isoform A	4.38e-85	346	42.197	O02218
dd_Smed_v6_14544_0_1	NA	NA	NA	1527	2.86878	3.19294	1.04e-09	2.57433	3.19294	4.58e-08	7.30449	5.95593	1.22642	darkblue	Contig2179	0.350899	6.0424	0.0871746	NA	NA	NA	NA	NA	NA	NA	NA	NA	NA	NA	NA	NA	NA	NA	NA	NA	NA	NA	NA	NA	NA	NA	NA	Q9VG39	kar	Karmoisin, isoform A	0.000294	126	28.571	Q9GRY3
dd_Smed_v6_1455_0_1	zn72d	ZNF346	Zinc finger protein 346	1144	3.48039	6.28035	2.97e-19	3.1897	6.28035	1.24e-16	11.161	9.12423	1.22322	darkblue	Contig2355	0.390829	7.51017	0.0335063	uniform	10,30,32	Cathepsin+ cell,Intestine,Neural	4,7	NA	NA	Q9UL40	ZNF346	Zinc finger protein 346	3e-05	152	24.342	O88532	Zfr	Zinc finger RNA-binding protein	9.63e-05	114	28.947	E7F1M0	zmat4b	Zinc finger, matrin-type 4b	0.000127	224	22.321	Q9VUY6	Zn72D	GH12756p	1.7e-05	271	22.878	NA
dd_Smed_v6_1458_0_1	NA	ACADL	Long-chain specific acyl-CoA dehydrogenase, mitochondrial	1494	1.12009	7.32758	0.000160483	0.930147	7.32758	0.00239052	2.17361	1.90547	1.14072	darkblue	Contig4612	0.25668	9.15232	0.276233	NA	6	Intestine	NA	NA	NA	P28330	ACADL	Long-chain specific acyl-CoA dehydrogenase, mitochondrial	0	384	66.146	P51174	Acadl	Long-chain specific acyl-CoA dehydrogenase, mitochondrial	0	384	65.885	Q6NWF0	zgc:85777	Zgc:85777	7.72e-63	395	33.418	Q9VSL9	Dmel\CG6638	CG6638	6.34e-64	377	32.626	Q22347
dd_Smed_v6_14593_0_1	NA	NA	NA	2380	7.44197	3.74362	8.84e-31	7.15015	3.74362	5.62e-29	173.883	142.039	1.22419	darkblue	NA	NA	NA	NA	NA	NA	NA	NA	NA	NA	NA	NA	NA	NA	NA	NA	NA	NA	NA	NA	NA	NA	NA	NA	NA	NA	NA	NA	NA	NA	NA	NA	NA	NA	NA
dd_Smed_v6_14614_0_1	NA	TRAF6	TNF receptor-associated factor 6	1428	5.10771	2.72513	1.39e-12	4.80531	2.72513	2.03e-11	34.4806	27.9604	1.23319	darkblue	NA	NA	NA	NA	NA	NA	NA	NA	NA	NA	Q9Y4K3	TRAF6	TNF receptor-associated factor 6	6.01e-10	117	30.769	P70196	Traf6	TNF receptor-associated factor 6	1.42e-09	117	30.769	Q6IWL4	traf6	TNF receptor-associated factor 6	1.64e-07	114	28.07	Q9W3I9	Traf6	GH01161p	1.96e-05	141	24.113	NA
dd_Smed_v6_1462_0_1	NA	SGTB	Small glutamine-rich tetratricopeptide repeat-containing protein beta	1445	1.14594	6.9478	7.06e-05	1.11874	6.9478	0.00012291	2.2129	2.17157	1.01903	darkblue	Contig3761	0.525481	7.94758	0.00515858	NA	NA	NA	NA	NA	Neoblast	Q96EQ0	SGTB	Small glutamine-rich tetratricopeptide repeat-containing protein beta	5.5e-46	207	44.444	Q8VD33	Sgtb	Small glutamine-rich tetratricopeptide repeat-containing protein beta	3.35e-46	207	44.928	Q7ZUM6	sgta	Zgc:55741	7.41e-45	205	43.415	Q9VJD4	Sgt	LD24721p	1.93e-32	219	34.703	Q21746
dd_Smed_v6_14623_0_1	NA	GRIN3A	Glutamate receptor ionotropic, NMDA 3A	1446	2.53394	1.46222	0.0138899	2.73718	1.46222	0.00868887	5.79151	6.66768	0.868596	dodgerblue	NA	NA	NA	NA	NA	NA	NA	NA	NA	NA	Q8TCU5	GRIN3A	Glutamate receptor ionotropic, NMDA 3A	1.52e-62	306	40.196	Q69Z52	Grin3a	MKIAA1973 protein	4.56e-62	306	39.869	Q71E64	gria2a	AMPA receptor subunit GluR1B	8.3e-05	230	23.043	Q8MM14	Nmdar2	Glutamate NMDA receptor subunit variant NR2-a	1.25e-21	201	31.343	G5EGQ9
dd_Smed_v6_1463_0_1	NA	PICALM	Phosphatidylinositol-binding clathrin assembly protein	2342	1.60542	6.758	1.96e-07	1.53021	6.758	8.61e-07	3.04284	2.88827	1.05351	darkblue	Contig1792	1.40497	7.98542	0.000107799	NA	30	Intestine	4	NA	NA	Q13492	PICALM	Phosphatidylinositol-binding clathrin assembly protein	3.09e-115	313	55.911	Q7M6Y3	Picalm	Phosphatidylinositol-binding clathrin assembly protein	5.17e-115	313	55.911	NA	NA	NA	NA	NA	NA	Q9VI75	lap	Phosphatidylinositol-binding clathrin assembly protein LAP	1.75e-117	304	57.237	Q9XZI6
dd_Smed_v6_1467_0_1	NA	EFHD1	EF-hand domain-containing protein D1	1020	2.05707	8.23348	7.42e-14	1.8851	8.23348	8.14e-12	4.16142	3.69378	1.1266	darkblue	Contig658	2.38586	9.30142	8.55e-05	NA	10,15,17,25,30,39	Cathepsin+ cell,Pharynx,Intestine	4	NA	Cathepsin+ b	Q9BUP0	EFHD1	EF-hand domain-containing protein D1	5.87e-49	166	52.41	Q9D8Y0	Efhd2	EF-hand domain-containing protein D2	5.39e-47	157	52.866	Q6DG81	pls3	Plastin 3 (T isoform)	0.000878	83	26.506	Q9VJ26	Swip-1	EF-hand domain-containing protein D2 homolog	4.71e-46	168	48.81	NA
dd_Smed_v6_1471_0_1	NA	NA	NA	1146	4.8499	8.17985	2.91e-40	4.82833	8.17985	5.69e-40	28.8381	28.41	1.01507	darkblue	Contig68	0.539234	8.52406	0.0367917	NA	6,30	Intestine	0,7	phagocytes	Gut	NA	NA	NA	NA	NA	NA	NA	NA	NA	NA	NA	NA	NA	NA	NA	NA	NA	NA	NA	NA	NA	NA	NA	NA	NA
dd_Smed_v6_14777_0_1	NA	POTEKP	Putative beta-actin-like protein 3	777	1.35905	4.6855	3.44e-05	1.3546	4.6855	4.2e-05	2.56517	2.55727	1.00309	darkblue	Contig7394	0.0560257	5.66643	0.635726	NA	28	Cathepsin+ cell	NA	NA	NA	Q9BYX7	POTEKP	Putative beta-actin-like protein 3	6.74e-14	43	76.744	Q3UAA9	Actb	Putative uncharacterized protein	1.02e-13	43	74.419	Q7ZVF9	actbb	Actin, cytoplasmic 2	8.88e-14	43	74.419	P53501	Act57B	Actin-57B	9.56e-14	43	74.419	Q6A8K1
dd_Smed_v6_1480_0_1	NA	APMAP	Adipocyte plasma membrane-associated protein	1290	3.30337	6.45046	7.42e-28	3.48486	6.45046	2.07e-30	9.87222	11.1956	0.881792	dodgerblue	Contig1622	1.00754	8.07947	0.000963981	NA	10,19,30	Cathepsin+ cell,Intestine	5,7	NA	NA	Q9HDC9	APMAP	Adipocyte plasma membrane-associated protein	3.27e-41	374	28.877	Q9D7N9	Apmap	Adipocyte plasma membrane-associated protein	7.55e-39	372	27.957	Q803F5	apmap	Adipocyte plasma membrane-associated protein	3.98e-44	331	31.42	Q9VAQ9	Ssl2	Strictosidine synthase-like 2	4.47e-22	233	30.472	O62040
dd_Smed_v6_14816_0_1	NA	SPRED1	Sprouty-related, EVH1 domain-containing protein 1	676	3.82128	1.48339	7.48e-05	4.46865	1.48339	5.82e-06	14.1358	22.1411	0.638441	orange	PL04018B2A07	-0.0281558	6.41751	0.782053	NA	19,20,21	Intestine,Neural	2	NA	NA	Q7Z699	SPRED1	Sprouty-related, EVH1 domain-containing protein 1	2.42e-12	92	36.957	Q924S8	Spred1	Sprouty-related, EVH1 domain-containing protein 1	6.89e-12	92	35.87	F1R8L9	spred1	Sprouty-related, EVH1 domain-containing 1	3.93e-13	142	33.803	Q7K0G4	Spred	SD10629p	1.37e-09	109	32.11	NA
dd_Smed_v6_14832_0_1	NA	TSTD1	Thiosulfate sulfurtransferase/rhodanese-like domain-containing protein 1	702	2.01223	1.82305	0.00911038	0.660291	1.82305	0.502658	4.03406	1.5804	2.55256	darkgreen	Contig6763	0.470862	6.58728	0.0134133	NA	NA	NA	NA	NA	NA	Q8NFU3	TSTD1	Thiosulfate sulfurtransferase/rhodanese-like domain-containing protein 1	6.92e-17	107	30.841	E9PY03	Tstd1	Thiosulfate sulfurtransferase (rhodanese)-like domain-containing 1	4.13e-19	128	30.469	NA	NA	NA	NA	NA	NA	NA	NA	NA	NA	NA	NA	NA
dd_Smed_v6_1488_0_1	NA	NA	NA	527	6.56919	6.98839	1.52e-71	5.6243	6.98839	2.12e-57	94.9561	49.3269	1.92504	green	NA	NA	NA	NA	NA	NA	NA	8	NA	NA	NA	NA	NA	NA	NA	NA	NA	NA	NA	NA	NA	NA	NA	NA	NA	NA	NA	NA	NA	NA	NA	NA	NA	NA	NA
dd_Smed_v6_1491_0_1	NA	NA	NA	837	6.69773	7.67535	2.96e-55	6.29067	7.67535	1.39e-50	103.805	78.2853	1.32598	darkblue	Contig610	-0.649258	7.86845	0.0210828	NA	NA	NA	8	goblet cells	NA	NA	NA	NA	NA	NA	NA	NA	NA	NA	NA	NA	NA	NA	NA	NA	NA	NA	NA	NA	NA	NA	NA	NA	NA	NA
dd_Smed_v6_14927_0_1	NA	CYP2C18	Cytochrome P450 2C18	1597	7.54298	3.16641	1.64e-18	7.45514	3.16641	3.86e-18	186.493	175.477	1.06277	darkblue	NA	NA	NA	NA	NA	30	Intestine	4	NA	NA	P33260	CYP2C18	Cytochrome P450 2C18	2.12e-48	450	27.778	P33267	Cyp2f2	Cytochrome P450 2F2	9.51e-54	455	29.231	B8A5Q1	cyp2u1	Cytochrome P450, family 2, subfamily U, polypeptide 1	1.38e-48	512	26.562	Q95078	Cyp18a1	Cytochrome P450 18a1	2.19e-38	455	26.154	Q27465
dd_Smed_v6_1493_0_1	NA	ALDH7A1	Alpha-aminoadipic semialdehyde dehydrogenase	1859	1.57752	7.09794	6e-08	1.26561	7.09794	1.9e-05	2.98456	2.40428	1.24135	darkblue	Contig2695	0.575493	7.8986	0.00798357	NA	6,7,14,30	Intestine,Muscle	7	NA	NA	P49419	ALDH7A1	Alpha-aminoadipic semialdehyde dehydrogenase	0	524	56.489	Q9DBF1	Aldh7a1	Alpha-aminoadipic semialdehyde dehydrogenase	0	524	56.298	F1QR17	aldh7a1	Aldehyde dehydrogenase 7 family, member A1	0	512	58.203	Q9VLC5	Aldh	Aldehyde dehydrogenase	2.64e-51	473	29.598	P46562
dd_Smed_v6_1494_0_1	NA	ATP6V1E1	ATPase, H+ transporting, lysosomal 31kDa, V1 subunit E isoform 1	854	1.95435	7.91442	1.93e-12	1.74449	7.91442	3.97e-10	3.87542	3.35076	1.15658	darkblue	Contig317	2.00837	9.39416	0.000365107	NA	1,10,17,18,23,30	Neural,Cathepsin+ cell,Intestine	4	NA	NA	Q53Y06	ATP6V1E1	ATPase, H+ transporting, lysosomal 31kDa, V1 subunit E isoform 1	4.86e-45	226	48.23	P50518	Atp6v1e1	V-type proton ATPase subunit E 1	5.95e-45	226	48.23	Q6NWK4	atp6v1e1b	ATPase, H+-transporting, lysosomal, V1 subunit E1b	2.27e-45	226	46.903	P54611	Vha26	V-type proton ATPase subunit E	7.17e-51	226	46.018	Q95X44
dd_Smed_v6_14969_0_1	NA	NA	NA	584	2.61847	2.57022	3.27e-06	2.72456	2.57022	1.51e-06	6.14097	6.60956	0.929103	dodgerblue	NA	NA	NA	NA	NA	NA	NA	NA	NA	NA	NA	NA	NA	NA	NA	NA	NA	NA	NA	NA	NA	NA	NA	NA	NA	NA	NA	NA	NA	NA	NA	NA	NA	NA	NA
dd_Smed_v6_15025_0_1	NA	NA	NA	614	4.45993	0.478526	0.000736027	3.35927	0.478526	0.0115498	22.0076	10.2622	2.14453	darkgreen	NA	NA	NA	NA	NA	24	Epidermal	NA	NA	NA	NA	NA	NA	NA	NA	NA	NA	NA	NA	NA	NA	NA	NA	NA	NA	NA	NA	NA	NA	NA	NA	NA	NA	NA	NA
dd_Smed_v6_1504_0_1	NA	CHP1	Calcineurin B homologous protein 1	862	1.68839	6.36067	1.98e-09	1.67706	6.36067	3.03e-09	3.22297	3.19776	1.00789	darkblue	Contig3171	0.7926	8.81661	0.000854917	NA	6,27,37,40	Intestine,Pharynx,Protonephridia	NA	NA	NA	Q99653	CHP1	Calcineurin B homologous protein 1	9.88e-48	195	52.308	P61022	Chp1	Calcineurin B homologous protein 1	1.31e-47	195	51.795	Q7T2F7	chp1	Calcineurin-like EF-hand protein 1	2.01e-42	194	50	Q9VNF9	elm	Ethanol sensitive with low memory, isoform A	3.75e-44	188	50.532	H9G2Y1
dd_Smed_v6_15049_0_1	NA	TRAF6	TNF receptor-associated factor 6	318	8.18391	0.963561	7.15e-10	7.31339	0.963561	2.71e-08	290.806	159.056	1.82832	green	PL06019B2F05	0.122337	6.32002	0.483433	NA	NA	NA	NA	NA	NA	Q9Y4K3	TRAF6	TNF receptor-associated factor 6	0.000549	85	35.294	NA	NA	NA	NA	NA	NA	Q6IWL4	traf6	TNF receptor-associated factor 6	0.000531	85	30.588	NA	NA	NA	NA	NA	NA	NA
dd_Smed_v6_1505_0_1	NA	TGFBI	Transforming growth factor-beta-induced protein ig-h3	2309	6.16897	9.45284	1.37e-63	5.94473	9.45284	3.19e-60	71.9521	61.5943	1.16816	darkblue	Contig1042	1.06299	9.56605	0.000359012	NA	6,30	Intestine	0,4,7	phagocytes	Gut	Q15582	TGFBI	Transforming growth factor-beta-induced protein ig-h3	6.31e-26	590	23.559	Q62009	Postn	Periostin	1.88e-25	470	26.596	A0JMK0	postnb	Periostin, osteoblast specific factor	5.61e-26	401	28.928	O61457	mfas	Midline fasciclin	1.46e-06	550	18.727	NA
dd_Smed_v6_1513_0_1	NA	SLC31A1	High affinity copper uptake protein 1	674	3.21921	4.49224	5.8e-06	3.41078	4.49224	2.01e-06	9.31275	10.6352	0.875652	dodgerblue	Contig1777	1.75612	9.69377	7.55e-05	NA	10,29,30	Cathepsin+ cell,Protonephridia,Intestine	4	NA	NA	O15431	SLC31A1	High affinity copper uptake protein 1	1.9e-17	167	34.132	Q8K211	Slc31a1	High affinity copper uptake protein 1	7.76e-20	164	34.756	F1QKH1	slc31a1	Solute carrier family 31 (copper transporter), member 1	6.04e-24	162	39.506	Q9W3X9	Ctr1A	Copper transporter 1A, isoform A	6.57e-13	158	29.114	NA
dd_Smed_v6_15132_0_1	NA	NA	NA	319	2.31481	4.58345	1.18e-10	2.35882	4.58345	6.22e-11	4.9754	5.12951	0.969956	dodgerblue	NA	NA	NA	NA	NA	NA	NA	NA	NA	NA	NA	NA	NA	NA	NA	NA	NA	NA	NA	NA	NA	NA	NA	NA	NA	NA	NA	NA	NA	NA	NA	NA	NA	NA	NA
dd_Smed_v6_1514_0_1	NA	CHMP2B	Charged multivesicular body protein 2b	847	2.22208	6.76187	1.07e-16	2.11302	6.76187	3.16e-15	4.66565	4.32597	1.07852	darkblue	Contig2325	2.17208	8.99775	2.73e-05	NA	30	Intestine	4	NA	NA	Q9UQN3	CHMP2B	Charged multivesicular body protein 2b	8.35e-41	158	49.367	Q8BJF9	Chmp2b	Charged multivesicular body protein 2b	9.69e-41	158	49.367	Q7ZW25	chmp2a	Charged multivesicular body protein 2a	3.09e-14	196	34.184	Q9VRJ5	CHMP2B	Charged multivesicular body protein 2b	3.31e-38	157	48.408	Q9U2F6
dd_Smed_v6_1517_0_1	NA	GSTM4	Glutathione S-transferase Mu 4	1083	1.77989	6.39848	1.7e-08	1.6552	6.39848	1.93e-07	3.43399	3.14967	1.09027	darkblue	Contig1944	0.528224	9.40035	0.0051287	NA	4,17,29	Cathepsin+ cell,Protonephridia	7	NA	Cathepsin+ b	Q03013	GSTM4	Glutathione S-transferase Mu 4	1.34e-80	216	51.389	Q8R5I6	Gstm4	Glutathione S-transferase mu 4	2.42e-82	216	52.778	B8JIS5	gstm.3	Glutathione S-transferase mu tandem duplicate 3	6.55e-80	216	51.852	P41043	GstS1	Glutathione S-transferase S1	3.14e-09	202	22.772	P10299
dd_Smed_v6_15178_0_1	six7	SIX6	Homeobox protein SIX6	1285	3.21073	1.5796	0.000741797	2.53544	1.5796	0.00903228	9.25816	5.79755	1.59691	green	NA	NA	NA	NA	no_signal_by_WISH	NA	NA	NA	NA	NA	O95475	SIX6	Homeobox protein SIX6	4.29e-85	182	77.473	Q62233	Six3	Homeobox protein SIX3	8.89e-85	185	77.297	O93282	six7	Homeobox protein Six7	3.62e-87	185	70.811	Q95RW8	Optix	Protein Optix	6.81e-79	188	73.936	Q23175
dd_Smed_v6_1518_0_1	NA	CLSTN1	Calsyntenin-1	3134	1.13942	6.35755	9.89e-05	0.983522	6.35755	0.00104103	2.20293	1.97729	1.11412	darkblue	Contig3071	1.01607	8.27174	0.000610396	NA	2,8,20,21,24,27,28,29,30,33,37,38,40,42	Epidermal,Neural,Pharynx,Cathepsin+ cell,Protonephridia,Intestine,Parapharyngeal	4	pharynx cell type	NA	O94985	CLSTN1	Calsyntenin-1	4.64e-48	819	26.252	Q9ER65	Clstn2	Calsyntenin-2	3.24e-49	583	28.645	F1R520	clstn1	Calsyntenin 1	5.16e-59	836	27.751	Q9V498	Cals	Calsyntenin-1	7.49e-37	609	25.616	G5ED46
dd_Smed_v6_1519_0_1	NA	HEL-S-5	Aminoacylase 1	1300	1.05691	6.26247	9.66e-05	1.28251	6.26247	2e-06	2.08048	2.43262	0.855241	dodgerblue	Contig6335	-0.720972	7.23456	0.306556	NA	6,10,17,19,22	Intestine,Cathepsin+ cell,Neoblast	0,7	NA	NA	V9HWA0	HEL-S-5	Aminoacylase 1	4.39e-123	392	45.408	Q99JW2	Acy1	Aminoacylase-1	2.86e-129	392	47.194	Q08BB2	pm20d1.2	N-fatty-acyl-amino acid synthase/hydrolase PM20D1.2	4.25e-10	154	33.117	NA	NA	NA	NA	NA	NA	NA
dd_Smed_v6_15204_0_1	NA	HSPA8	HSPA8 protein	966	5.54297	1.42032	0.000245927	5.81283	1.42032	0.000157368	46.6229	56.2131	0.829396	dodgerblue	Contig4015	0.208125	5.76122	0.215009	NA	NA	NA	NA	NA	NA	Q96IS6	HSPA8	HSPA8 protein	4.99e-124	258	75.969	P63017	Hspa8	Heat shock cognate 71 kDa protein	2.48e-123	258	75.969	Q90473	hspa8	Heat shock cognate 71 kDa protein	3.79e-123	258	75.969	P11147	Hsc70-4	Heat shock 70 kDa protein cognate 4	1.86e-123	258	75.581	P09446
dd_Smed_v6_1522_0_1	NA	SH3KBP1	SH3 domain-containing kinase-binding protein 1	2057	2.74997	7.61024	1.63e-22	2.56618	7.61024	6.55e-20	6.72705	5.92237	1.13587	darkblue	PL06002X1B06	0.528755	8.08218	0.0706801	NA	10,17,28,30,41	Cathepsin+ cell,Intestine	4	NA	NA	Q96B97	SH3KBP1	SH3 domain-containing kinase-binding protein 1	4.38e-29	279	35.842	Q9JLQ0	Cd2ap	CD2-associated protein	1.99e-26	235	34.894	E7FAT0	sh3kbp1	SH3-domain kinase-binding protein 1	7.07e-30	221	36.652	A0A0B4KI34	cindr	CIN85 and CD2AP orthologue, isoform J	8.69e-17	202	30.693	Q9U2T9
dd_Smed_v6_1523_0_1	pgrp-lb	PGLYRP3	Peptidoglycan recognition protein 3	824	3.56807	7.1824	1.41e-31	2.34429	7.1824	2.23e-15	11.8603	5.07811	2.33557	darkgreen	Contig6433	0.377045	9.07687	0.0949275	goblet	11,24,27,29,30,37	Epidermal,Pharynx,Protonephridia,Intestine	4	NA	NA	Q96LB9	PGLYRP3	Peptidoglycan recognition protein 3	8.75e-40	161	44.099	Q8VCS0	Pglyrp2	N-acetylmuramoyl-L-alanine amidase	1.43e-42	140	50.714	Q1W1Y1	pglyrp6	Peptidoglycan recognition protein 6	3.61e-39	164	40.854	Q8INK6	PGRP-LB	Peptidoglycan-recognition protein LB	9.98e-45	162	40.741	NA
dd_Smed_v6_15296_0_1	NA	RAPH1	Ras-associated and pleckstrin homology domains-containing protein 1	2191	6.45155	3.50377	4.57e-17	6.15773	3.50377	6.66e-16	87.5203	71.3942	1.22587	darkblue	NA	NA	NA	NA	NA	NA	NA	NA	NA	NA	Q70E73	RAPH1	Ras-associated and pleckstrin homology domains-containing protein 1	2.25e-20	285	28.07	F2Z4B7	Raph1	Ras association (RalGDS/AF-6) and pleckstrin homology domains 1	5.5e-20	270	27.407	Q68EG5	grb10a	Grb10 protein	9.97e-11	248	25	Q8IQW0	pico	Pico, isoform B	4.73e-10	242	21.901	P34400
dd_Smed_v6_1531_0_1	NA	NA	NA	738	1.51784	3.8737	0.00622659	0.741431	3.8737	0.249798	2.86363	1.67183	1.71287	green	PL04010A1F12	-0.346399	8.40236	0.232036	NA	6,18,19,20,22,25,33,34	Intestine,Neural,Neoblast,Pharynx	NA	NA	NA	NA	NA	NA	NA	NA	NA	NA	NA	NA	NA	NA	NA	NA	NA	NA	NA	NA	NA	NA	NA	NA	NA	NA	NA	NA
dd_Smed_v6_15390_0_1	NA	NA	NA	1601	4.08717	3.69978	1.18e-17	4.05306	3.69978	2.25e-17	16.9966	16.5994	1.02393	darkblue	Contig7706	0.577895	6.099	0.0158173	NA	NA	NA	NA	NA	NA	NA	NA	NA	NA	NA	NA	NA	NA	NA	NA	NA	NA	NA	NA	NA	NA	NA	NA	NA	NA	NA	NA	NA	NA	NA
dd_Smed_v6_154_0_1	plin5	PLIN5	Perilipin-5	1444	3.36044	9.9159	1.99e-22	3.18643	9.9159	1.79e-20	10.2705	9.10357	1.12818	darkblue	Contig1083	3.04998	11.7446	0.000108486	uniform	19,25,27,30,37,40	Intestine,Pharynx,Protonephridia	4,5,7	pharynx cell type,phagocytes,goblet cells	NA	Q00G26	PLIN5	Perilipin-5	7.18e-07	104	26.923	Q8BVZ1	Plin5	Perilipin-5	2.35e-08	284	22.183	NA	NA	NA	NA	NA	NA	Q9VXY7	Lsd-2	Lipid storage droplets surface-binding protein 2	7.03e-05	113	25.664	NA
dd_Smed_v6_1542_0_1	NA	NA	NA	1074	2.42879	4.34361	1.64e-11	2.12255	4.34361	4.41e-09	5.38442	4.35463	1.23648	darkblue	Contig3692	0.940056	9.26636	0.000443366	NA	9,18,21,24,27,30,34,37,40	Neural,Epidermal,Pharynx,Intestine,Protonephridia	4	NA	NA	NA	NA	NA	NA	NA	NA	Q8VCZ2	Tmem45b	Transmembrane protein 45B	4.12e-31	278	29.856	Q503F7	tmem45a	Transmembrane protein 45a	2.4e-30	285	31.228	NA	NA	NA	NA	NA	NA	NA
dd_Smed_v6_1544_0_1	scamp1	SCAMP1	Secretory carrier-associated membrane protein 1	1198	3.14956	7.34655	1.23e-24	3.10972	7.34655	4.45e-24	8.87382	8.63213	1.028	darkblue	Contig951	2.48172	9.05607	2.53e-05	uniform	10,17,28,30,41	Cathepsin+ cell,Intestine	4	NA	NA	O15126	SCAMP1	Secretory carrier-associated membrane protein 1	3.9e-45	300	34.333	Q8K021	Scamp1	Secretory carrier-associated membrane protein 1	6.01e-45	301	34.884	Q6P0B3	scamp1	Secretory carrier-associated membrane protein	3.11e-40	289	33.564	Q9VXV6	Scamp	Secretory carrier-associated membrane protein	4.97e-38	287	33.449	NA
dd_Smed_v6_1553_0_1	novel	NA	NA	515	7.15508	5.56194	2.8e-16	7.49062	5.56194	3.09e-17	142.526	179.846	0.79249	dodgerblue	Contig213	2.32055	9.50172	9.67e-05	uniform	6,30	Intestine	0,7	NA	NA	NA	NA	NA	NA	NA	NA	NA	NA	NA	NA	NA	NA	NA	NA	NA	NA	NA	NA	NA	NA	NA	NA	NA	NA	NA
dd_Smed_v6_15545_0_1	NA	NA	NA	1806	5.86893	3.38947	1e-10	6.17793	3.38947	1.96e-11	58.4419	72.4008	0.8072	dodgerblue	NA	NA	NA	NA	NA	30	Intestine	4	NA	NA	NA	NA	NA	NA	NA	NA	P15919	Rag1	V(D)J recombination-activating protein 1	0.000105	102	27.451	F1R1J1	lnx2a	Ligand of numb-protein X 2a	0.000116	82	29.268	NA	NA	NA	NA	NA	NA	NA
dd_Smed_v6_1558_0_1	NA	NA	NA	537	1.35391	6.5263	0.00138628	1.27575	6.5263	0.00314623	2.55604	2.42125	1.05567	darkblue	Contig67	0.583426	8.73333	0.00829222	NA	NA	NA	NA	NA	NA	NA	NA	NA	NA	NA	NA	NA	NA	NA	NA	NA	NA	NA	NA	NA	NA	NA	NA	NA	NA	NA	NA	NA	NA	NA
dd_Smed_v6_1559_0_1	NA	BCAP31	B-cell receptor-associated protein 31	982	1.61032	6.33668	4.86e-09	1.51948	6.33668	4.2e-08	3.05319	2.86688	1.06499	darkblue	Contig1500	1.1055	8.04686	0.000233891	NA	30	Intestine	NA	NA	NA	P51572	BCAP31	B-cell receptor-associated protein 31	4.86e-35	234	41.026	Q61335	Bcap31	B-cell receptor-associated protein 31	1.43e-34	233	41.631	Q5RIX5	bcap29	B-cell receptor-associated protein 29	2.48e-44	252	38.095	Q9W0M4	Dmel\CG13887	LP10861p	3.54e-33	221	36.199	G5EBI0
dd_Smed_v6_1562_0_1	NA	TMX1	Thioredoxin-related transmembrane protein 1	894	1.81607	5.33816	4.34e-06	1.49077	5.33816	0.00020741	3.5212	2.81038	1.25293	darkblue	Contig1419	0.870078	9.13249	0.00050225	NA	NA	NA	NA	NA	NA	Q9H3N1	TMX1	Thioredoxin-related transmembrane protein 1	1.41e-39	200	33	Q8VBT0	Tmx1	Thioredoxin-related transmembrane protein 1	3.59e-36	153	37.255	F1Q6B4	tmx1	Thioredoxin-related transmembrane protein 1	4.64e-41	201	36.816	Q9W1I7	CG5554	CG5554, isoform A	5.23e-38	229	31.878	G5EC91
dd_Smed_v6_1563_0_1	NA	CLINT1	Clathrin interactor 1	2074	3.12719	3.98536	1.54e-07	2.74576	3.98536	4.15e-06	8.7373	6.70745	1.30263	darkblue	Contig6480	1.31563	8.57048	0.00903285	NA	2,4,6,10,11,19,27,28,31	Epidermal,Cathepsin+ cell,Intestine,Pharynx	2,5	late epidermal progenitors 2,glia	NA	Q14677	CLINT1	Clathrin interactor 1	1.02e-30	142	43.662	Q99KN9	Clint1	Clathrin interactor 1	3.32e-29	135	45.185	Q6DRL7	clint1a	Enthoprotin	1.41e-32	215	36.744	Q9NH51	lqfR	Epsin-like protein	5.77e-31	142	42.254	Q9BI71
dd_Smed_v6_1565_0_1	NA	LIPF	Gastric triacylglycerol lipase	1507	5.70547	7.51278	7.21e-72	5.60437	7.51278	9.44e-70	52.1815	48.6499	1.07259	darkblue	Contig6356	3.5441	10.5223	0.000888513	NA	30	Intestine	4	phagocytes	Gut	P07098	LIPF	Gastric triacylglycerol lipase	7.16e-110	377	44.828	Q8BM14	Lipk	Lipase member K	1.69e-104	374	43.583	Q7ZTR9	lipf	Lipase	1.26e-110	374	45.187	Q4V6L4	CG8093	Lipase	1.16e-79	370	37.568	Q93789
dd_Smed_v6_1570_0_1	NA	NA	NA	1803	4.16549	3.86306	1.12e-13	4.09665	3.86306	2.92e-13	17.9448	17.1087	1.04887	darkblue	NA	NA	NA	NA	NA	17,27,29,30,42	Cathepsin+ cell,Pharynx,Protonephridia,Intestine	4	NA	NA	NA	NA	NA	NA	NA	NA	NA	NA	NA	NA	NA	NA	NA	NA	NA	NA	NA	NA	NA	NA	NA	NA	NA	NA	NA
dd_Smed_v6_1584_0_1	NA	UPB1	Beta-ureidopropionase	1558	3.35832	5.13439	5.79e-20	2.88165	5.13439	2.15e-15	10.2555	7.36995	1.39153	darkblue	Contig2599	2.4153	10.1199	6e-05	NA	10,11,17,24,25,29,30,37,40,43	Cathepsin+ cell,Epidermal,Pharynx,Protonephridia,Intestine	4	NA	NA	Q9UBR1	UPB1	Beta-ureidopropionase	2.77e-174	374	62.032	Q8VC97	Upb1	Beta-ureidopropionase	9.51e-172	374	61.23	Q66IE6	nit1	Nitrilase 1	1.19e-06	188	23.404	Q9VI04	pyd3	Beta-alanine synthase	3.01e-161	356	60.393	Q19437
dd_Smed_v6_1585_0_1	cbs	CBS	Cystathionine beta-synthase	1897	2.42991	7.14177	1.03e-17	2.43456	7.14177	1.02e-17	5.38859	5.40599	0.996781	dodgerblue	Contig1264	1.53947	9.98987	0.000123728	uniform	10,19,24,30,43	Cathepsin+ cell,Intestine,Epidermal	4,5	goblet cells	NA	P35520	CBS	Cystathionine beta-synthase	0	512	57.031	Q91WT9	Cbs	Cystathionine beta-synthase	0	517	57.447	F1QIC0	cbsb	Cystathionine beta-synthase	0	514	57.393	Q9VRD9	Cbs	Cystathionine beta-synthase	5.76e-160	510	50.784	G5EFH8
dd_Smed_v6_1587_0_1	NA	NA	NA	759	5.18926	6.95123	8.59e-63	5.10603	6.95123	4.03e-61	36.4857	34.4405	1.05938	darkblue	Contig1222	2.39991	9.36544	2.61e-05	NA	11,19,30	Epidermal,Intestine	2,4	NA	NA	NA	NA	NA	NA	NA	NA	NA	NA	NA	NA	NA	NA	NA	NA	NA	NA	NA	NA	NA	NA	NA	NA	NA	NA	NA
dd_Smed_v6_1589_0_1	NA	ATP6V1F	V-type proton ATPase subunit F	575	2.04661	6.82039	4.87e-14	1.8089	6.82039	3.11e-11	4.13133	3.50376	1.17911	darkblue	Contig6464	1.67049	9.08835	0.00233211	NA	30	Intestine	4	NA	NA	Q16864	ATP6V1F	V-type proton ATPase subunit F	6.21e-55	117	67.521	Q9D1K2	Atp6v1f	V-type proton ATPase subunit F	4.56e-55	117	68.376	Q6DRK0	atp6v1f	V-type proton ATPase subunit F	4.05e-59	117	71.795	Q24583	Vha14-1	V-type proton ATPase subunit F 1	4.8e-54	115	67.826	Q23680
dd_Smed_v6_1593_1_1	NA	HADHB	Trifunctional enzyme subunit beta, mitochondrial	461	1.39841	6.58489	2.93e-07	1.08249	6.58489	0.000104086	2.63612	2.11769	1.24481	darkblue	Contig7558	-0.24918	8.72863	0.283567	NA	6	Intestine	NA	NA	NA	B5MD38	HADHB	Trifunctional enzyme subunit beta, mitochondrial	4.69e-41	96	66.667	Q99JY0	Hadhb	Trifunctional enzyme subunit beta, mitochondrial	2.36e-41	96	67.708	A0A0G2KML7	-	Uncharacterized protein	1.48e-10	75	36	Q9W1H8	Thiolase	GH13256p	1.02e-37	95	64.211	P34255
dd_Smed_v6_1595_0_1	NA	NA	NA	1191	5.9596	7.67422	1.34e-66	5.74473	7.67422	5.11e-63	62.2326	53.6213	1.16059	darkblue	Contig6667	1.93291	8.49089	0.00226036	NA	30	Intestine	4	phagocytes	NA	NA	NA	NA	NA	NA	NA	NA	NA	NA	NA	NA	NA	NA	NA	NA	NA	NA	NA	NA	NA	NA	NA	NA	NA	NA
dd_Smed_v6_1599_0_1	NA	CORO1B	Coronin-1B	2343	1.0964	7.22	0.000141836	0.965079	7.22	0.00106619	2.1382	1.95217	1.09529	darkblue	Contig6501	1.06241	8.36798	0.00187012	NA	10,17,30	Cathepsin+ cell,Intestine	NA	NA	NA	Q9BR76	CORO1B	Coronin-1B	7.12e-72	402	32.836	Q9WUM3	Coro1b	Coronin-1B	4.81e-72	402	33.085	Q7SX58	coro1a	Coronin	1.44e-68	474	30.802	Q7JVY0	coro	Coronin	3.28e-83	407	34.398	Q21624
dd_Smed_v6_160_0_1	NA	DBI	Acyl-CoA-binding protein	497	1.9198	9.93605	1.32e-08	1.79804	9.93605	1.24e-07	3.7837	3.47748	1.08806	darkblue	Contig391	1.31983	10.8415	0.000187331	NA	4,6,19,25,28,30	Cathepsin+ cell,Intestine,Pharynx	0,7	phagocytes	NA	P07108	DBI	Acyl-CoA-binding protein	3.86e-34	86	59.302	P31786	Dbi	Acyl-CoA-binding protein	3.58e-32	86	59.302	Q6P5L2	dbi	Diazepam-binding inhibitor (GABA receptor modulator, acyl-CoA binding protein)	7.68e-33	86	60.465	P42281	Dbi	Acyl-CoA-binding protein homolog	3.34e-22	83	44.578	O01805
dd_Smed_v6_16071_0_1	NA	NA	NA	341	5.45104	1.9737	4.9e-06	4.84211	1.9737	4.1e-05	43.7448	28.6826	1.52513	green	NA	NA	NA	NA	NA	NA	NA	NA	NA	NA	NA	NA	NA	NA	NA	NA	NA	NA	NA	NA	NA	NA	NA	NA	NA	NA	NA	NA	NA	NA	NA	NA	NA	NA	NA
dd_Smed_v6_162_0_1	NA	GRN	Granulins	228	2.50558	1.8717	0.00506394	2.63925	1.8717	0.00349623	5.67878	6.23007	0.911511	dodgerblue	PL06004A1G01	3.10631	11.3787	0.000640308	NA	17,30,39	Cathepsin+ cell,Intestine	4	NA	NA	K7EKL3	GRN	Granulins	5.14e-13	47	63.83	P28798	Grn	Granulins	2.1e-13	65	50.769	F1R6I2	grnb	Granulin b	2.19e-13	70	44.286	NA	NA	NA	NA	NA	NA	NA
dd_Smed_v6_1621_0_1	aldh8a1	ALDH8A1	Aldehyde dehydrogenase family 8 member A1	1602	7.43451	6.31265	6.03e-27	7.60306	6.31265	1.02e-27	172.986	194.423	0.889741	dodgerblue	PL06013B2E03	1.38227	7.55138	0.00440355	uniform	30	Intestine	4	NA	NA	Q9H2A2	ALDH8A1	Aldehyde dehydrogenase family 8 member A1	2.68e-176	482	49.585	Q8BH00	Aldh8a1	Aldehyde dehydrogenase family 8 member A1	7.97e-174	484	50.413	Q66I21	aldh8a1	Aldehyde dehydrogenase family 8 member A1	2.66e-167	483	47.826	Q9VLC5	Aldh	Aldehyde dehydrogenase	2.77e-100	481	37.006	Q20780
dd_Smed_v6_1622_0_1	NA	ATP6V0B	V-type proton ATPase 21 kDa proteolipid subunit	970	2.17098	8.83269	1.22e-14	1.93739	8.83269	6.33e-12	4.50328	3.83012	1.17576	darkblue	Contig133	2.02982	10.5283	2.34e-05	NA	8,9,10,17,30	Neural,Cathepsin+ cell,Intestine	4	NA	NA	Q99437	ATP6V0B	V-type proton ATPase 21 kDa proteolipid subunit	1.97e-73	185	71.892	Q91V37	Atp6v0b	V-type proton ATPase 21 kDa proteolipid subunit	3.5e-74	192	69.792	F1QYM3	atp6v0b	ATPase, H+-transporting, lysosomal V0 subunit b	3.49e-74	192	69.271	Q9VFE3	VhaPPA1-1	GH03514p	7.64e-62	211	57.346	G5EDB8
dd_Smed_v6_16234_0_1	NA	NA	NA	464	3.84773	1.29955	0.00074491	2.6814	1.29955	0.0210854	14.3974	6.41478	2.24441	darkgreen	NA	NA	NA	NA	NA	NA	NA	NA	NA	NA	NA	NA	NA	NA	NA	NA	NA	NA	NA	NA	NA	NA	NA	NA	NA	NA	NA	NA	NA	NA	NA	NA	NA	NA	NA
dd_Smed_v6_1625_0_1	NA	LIMA1	LIM domain and actin-binding protein 1	1414	1.12499	6.19551	0.000425281	1.13769	6.19551	0.000416389	2.181	2.20028	0.991237	dodgerblue	Contig4720	0.698619	6.84001	0.0635698	NA	2,10,11,17,24,30	Epidermal,Cathepsin+ cell,Intestine	4	NA	NA	Q9UHB6	LIMA1	LIM domain and actin-binding protein 1	5.77e-13	72	37.5	Q9ERG0	Lima1	LIM domain and actin-binding protein 1	4.15e-13	72	37.5	F8W5N8	csrp1a	Cysteine and glycine-rich protein 1a	2.26e-10	59	40.678	Q24400	Mlp84B	Muscle LIM protein Mlp84B	7.57e-07	80	33.75	Q9GP94
dd_Smed_v6_1626_0_1	NA	MYO1E	Unconventional myosin-Ie	5301	1.18678	6.50225	6.25e-06	1.15468	6.50225	1.31e-05	2.27644	2.22635	1.0225	darkblue	Contig59	0.644912	6.4948	0.00358708	NA	0,5,22	Neoblast	NA	neoblast 1,neoblast 13,aqp+ parenchymal cells,psap+ parenchymal cells	Cathepsin+ b	Q12965	MYO1E	Unconventional myosin-Ie	0	1119	52.815	E9Q634	Myo1e	Unconventional myosin-Ie	0	1119	52.368	Q6PFT4	myo1eb	Zgc:64042	0	1111	54.815	Q23979	Myo61F	Myosin-IB	0	716	44.274	P91443
dd_Smed_v6_16290_0_1	NA	-	P2X purinoceptor	428	3.5011	1.15528	0.00151701	4.02698	1.15528	0.00033636	11.3224	16.3021	0.694537	dodgerblue	Contig4638	-0.149386	6.38338	0.479435	NA	19	Intestine	2,5	NA	NA	B7Z6W8	-	P2X purinoceptor	8.13e-13	76	48.684	B7ZND5	P2rx5	P2X purinoceptor	5.73e-13	93	37.634	B3DHW4	p2rx1	P2X purinoceptor	4.97e-17	103	37.864	NA	NA	NA	NA	NA	NA	NA
dd_Smed_v6_1630_0_1	NA	STK24	Serine/threonine-protein kinase 24	1654	1.91618	8.44571	3.09e-10	1.80393	8.44571	3.73e-09	3.77423	3.49171	1.08091	darkblue	Contig353	1.34155	8.86765	0.000213801	NA	8,9,10,15,17,23,28,31,33,39	Neural,Cathepsin+ cell	7	aqp+ parenchymal cells,pigment,glia	NA	H0Y630	STK24	Serine/threonine-protein kinase 24	1.87e-26	192	37.5	Q99KH8	Stk24	Serine/threonine-protein kinase 24	4.97e-26	208	36.538	B0S8J3	map3k19	Mitogen-activated protein kinase kinase kinase 19	5.76e-28	224	30.357	Q9VXE5	mbt	Serine/threonine-protein kinase PAK mbt	8.54e-25	190	33.684	G5EFU0
dd_Smed_v6_1633_0_1	NA	SPTLC2	Serine palmitoyltransferase 2	1910	1.53559	6.63802	6e-07	1.3599	6.63802	1.26e-05	2.89908	2.56668	1.12951	darkblue	Contig3749	1.51285	10.0769	6.48e-05	NA	2,11,24,30,33,37	Epidermal,Intestine,Neural,Pharynx	4,7	NA	NA	O15270	SPTLC2	Serine palmitoyltransferase 2	0	499	52.305	P97363	Sptlc2	Serine palmitoyltransferase 2	0	501	52.096	Q9YHT4	alas2	5-aminolevulinate synthase, erythroid-specific, mitochondrial	8.81e-28	308	30.195	Q9V3F2	lace	LD36009p	5.97e-165	514	48.444	P91079
dd_Smed_v6_1643_0_1	crn-7	DNASE2	Deoxyribonuclease-2-alpha	1194	2.53943	4.62243	1.81e-08	2.51469	4.62243	2.89e-08	5.81359	5.71475	1.0173	darkblue	Contig4893	1.79594	8.15059	0.0103185	uniform	10,17,28,30,39	Cathepsin+ cell,Intestine	4	NA	NA	O00115	DNASE2	Deoxyribonuclease-2-alpha	8.39e-55	355	30.423	Q9QY48	Dnase2b	Deoxyribonuclease-2-beta	9.96e-58	351	31.624	F1QKH7	dnase2b	Deoxyribonuclease II beta	1.44e-53	349	32.665	Q9VED8	DNaseII	Deoxyribonuclease II	1.9e-52	347	31.7	P34387
dd_Smed_v6_1644_0_1	NA	GALNT10	Polypeptide N-acetylgalactosaminyltransferase 10	1934	1.56949	5.84375	2.45e-08	1.1023	5.84375	0.000135784	2.968	2.14697	1.38241	darkblue	Contig4834	0.491385	7.30289	0.00743978	NA	10,39	Cathepsin+ cell	NA	NA	NA	Q86SR1	GALNT10	Polypeptide N-acetylgalactosaminyltransferase 10	0	550	51.455	E5D8G1	Galntl6	Polypeptide N-acetylgalactosaminyltransferase	0	548	51.095	NA	NA	NA	NA	NA	NA	Q6WV16	pgant6	N-acetylgalactosaminyltransferase 6	0	544	52.574	O45947
dd_Smed_v6_16447_0_1	NA	NA	NA	920	3.2312	2.745	7.77e-09	3.2774	2.745	5.76e-09	9.39048	9.69609	0.968482	dodgerblue	NA	NA	NA	NA	NA	NA	NA	NA	NA	NA	NA	NA	NA	NA	NA	NA	NA	NA	NA	NA	NA	NA	NA	NA	NA	NA	NA	NA	NA	NA	NA	NA	NA	NA	NA
dd_Smed_v6_1645_0_1	NA	CHMP1A	Charged multivesicular body protein 1a	789	1.20979	6.97335	4.95e-06	1.17173	6.97335	1.16e-05	2.31304	2.25282	1.02673	darkblue	Contig5740	1.49763	9.23796	0.00290899	NA	30	Intestine	4	NA	NA	Q9HD42	CHMP1A	Charged multivesicular body protein 1a	5.04e-73	200	53.5	Q921W0	Chmp1a	Charged multivesicular body protein 1a	7.48e-71	200	52.5	Q6PHF0	chmp1a	Charged multivesicular body protein 1a	9.5e-72	200	55	Q95SH2	Chmp1	Charged multivesicular body protein 1, isoform A	2.27e-46	206	44.175	Q9TXI3
dd_Smed_v6_16471_0_1	NA	NA	NA	699	3.03179	2.36702	2.18e-07	2.52837	2.36702	1.66e-05	8.17826	5.76921	1.41757	darkblue	NA	NA	NA	NA	NA	NA	NA	NA	NA	NA	NA	NA	NA	NA	NA	NA	NA	NA	NA	NA	NA	NA	NA	NA	NA	NA	NA	NA	NA	NA	NA	NA	NA	NA	NA
dd_Smed_v6_1649_0_1	NA	SATL1	Spermidine/spermine N(1)-acetyltransferase-like protein 1	1043	2.04044	7.11405	5.41e-14	1.82547	7.11405	1.94e-11	4.11371	3.54421	1.16068	darkblue	Contig1663	1.37513	9.68838	8.56e-05	NA	2,6,9,13,14,19,20,21,27,30,37	Epidermal,Intestine,Neural,Muscle,Pharynx	4,7	NA	NA	Q86VE3	SATL1	Spermidine/spermine N(1)-acetyltransferase-like protein 1	6.65e-07	140	33.571	A0A140LIY9	Qrich2	Glutamine-rich 2	2.57e-09	164	37.195	Q6PCS2	zgc:64189	Zgc:64189	0.000165	76	35.526	Q7K533	Gbp2	GH14572p	2.74e-06	80	32.5	NA
dd_Smed_v6_16506_0_1	NA	NA	NA	1233	7.20219	1.51418	1.66e-12	6.73013	1.51418	3.12e-11	147.257	106.163	1.38709	darkblue	NA	NA	NA	NA	NA	NA	NA	NA	NA	NA	NA	NA	NA	NA	NA	NA	NA	NA	NA	NA	NA	NA	NA	NA	NA	NA	NA	NA	NA	NA	NA	NA	NA	NA	NA
dd_Smed_v6_1655_0_1	uroc1	UROC1	Urocanate hydratase	2296	5.07174	7.76772	4.55e-48	4.93504	7.76772	4.52e-46	33.6314	30.5911	1.09938	darkblue	Contig1949	0.318471	8.22037	0.066789	basal	6,19,30	Intestine	5,7	NA	NA	Q96N76	UROC1	Urocanate hydratase	0	666	58.408	Q8VC12	Uroc1	Urocanate hydratase	0	662	58.761	F1QPT1	uroc1	Urocanate hydratase 1	0	668	58.832	NA	NA	NA	NA	NA	NA	NA
dd_Smed_v6_1659_0_1	NA	NA	NA	1182	1.62374	6.14527	2.33e-08	1.46423	6.14527	6.04e-07	3.08172	2.75916	1.1169	darkblue	Contig6284	0.96761	8.28652	0.0052685	NA	10,30	Cathepsin+ cell,Intestine	4	NA	NA	NA	NA	NA	NA	NA	NA	NA	NA	NA	NA	NA	NA	NA	NA	NA	NA	NA	NA	NA	NA	NA	NA	NA	NA	NA
dd_Smed_v6_16675_0_1	NA	NA	NA	1081	5.12585	1.74348	5.2e-05	5.80551	1.74348	8.33e-06	34.9167	55.9286	0.624309	orange	NA	NA	NA	NA	NA	NA	NA	NA	NA	NA	NA	NA	NA	NA	NA	NA	NA	NA	NA	NA	NA	NA	NA	NA	NA	NA	NA	NA	NA	NA	NA	NA	NA	NA	NA
dd_Smed_v6_1670_0_1	NA	NDE1	Nuclear distribution protein nudE homolog 1	1488	0.923287	4.89884	0.00589392	1.13102	4.89884	0.000634544	1.89643	2.19014	0.865897	dodgerblue	Contig5433	0.475813	8.25468	0.0121281	NA	17	Cathepsin+ cell	NA	NA	Cathepsin+ b	Q9NXR1	NDE1	Nuclear distribution protein nudE homolog 1	5.63e-48	290	45.172	Q9CZA6	Nde1	Nuclear distribution protein nudE homolog 1	1.58e-48	349	40.974	Q803Q2	ndel1b	Nuclear distribution protein nudE-like 1-B	1.74e-41	355	37.746	Q9VT70	nudE	Nuclear distribution protein nudE homolog	8.79e-16	177	38.418	NA
dd_Smed_v6_16749_0_1	NA	CYP20A1	Cytochrome P450 20A1	1694	4.84334	2.70384	7.36e-09	4.0851	2.70384	7.29e-07	28.7073	16.9721	1.69143	green	NA	NA	NA	NA	NA	NA	NA	NA	NA	NA	Q6UW02	CYP20A1	Cytochrome P450 20A1	3.06e-32	454	24.229	Q8BKE6	Cyp20a1	Cytochrome P450 20A1	2.43e-32	460	25	Q8JH93	cyp11a1	Cyp11a1	4.11e-23	182	32.418	Q9VL92	Cyp4e3	Cytochrome P450 4e3	5.78e-26	365	25.205	Q09660
dd_Smed_v6_1680_0_1	NA	ALDH3B1	Aldehyde dehydrogenase family 3 member B1	1759	1.17218	7.5351	2.02e-05	1.00997	7.5351	0.000319776	2.25352	2.01387	1.119	darkblue	Contig7659	0.47736	8.67627	0.144931	NA	6,10,19,28,39,41	Intestine,Cathepsin+ cell	3,7	NA	NA	P43353	ALDH3B1	Aldehyde dehydrogenase family 3 member B1	2.27e-141	447	47.875	J3QMK6	Aldh3b3	Aldehyde dehydrogenase family 3 member B3	5.96e-143	459	46.841	Q90ZZ7	aldh3b1	Aldehyde dehydrogenase	6.74e-145	469	46.055	Q9VBP6	Ssadh	GH21316p	1.77e-33	441	26.984	Q20352
dd_Smed_v6_1694_0_1	hnf-4	HNF4G	Hepatocyte nuclear factor 4-gamma	2661	2.09332	6.87078	2.66e-16	1.69013	6.87078	4.27e-11	4.26729	3.22686	1.32243	darkblue	Contig5288	0.848041	7.56078	0.000552714	uniform	4,6,10,15,17,19,22,28,31,39,41,42	Cathepsin+ cell,Intestine,Neoblast	NA	pgrn+ parenchymal cells,aqp+ parenchymal cells,pigment,parenchymal progenitors	NA	Q14541	HNF4G	Hepatocyte nuclear factor 4-gamma	2.66e-111	326	53.067	Q9WUU6	Hnf4g	Hepatocyte nuclear factor 4-gamma	5.06e-110	326	52.454	Q8AXB6	hnf4a	Hepatocyte nuclear factor 4 alpha	8.02e-112	347	51.585	P49866	Hnf4	Transcription factor HNF-4 homolog	3.78e-105	338	50.592	P91829
dd_Smed_v6_17_0_1	NA	NA	NA	644	3.19611	10.9948	6.99e-22	3.27604	10.9948	9.5e-23	9.16483	9.68691	0.946105	dodgerblue	Contig2023	3.5	12.5267	2.7e-05	NA	4,6,10,15,22,28,29,30,39,42	Cathepsin+ cell,Intestine,Neoblast,Protonephridia	4,7	protonephridia,pgrn+ parenchymal cells,phagocytes,aqp+ parenchymal cells,ldlrr-1+ parenchymal cells,gut progenitors	NA	NA	NA	NA	NA	NA	NA	NA	NA	NA	NA	NA	NA	NA	NA	NA	NA	NA	NA	O97428	cib	Ciboulot, isoform A	2.41e-08	108	35.185	O17389
dd_Smed_v6_1701_0_1	NA	SNF8	Vacuolar-sorting protein SNF8	851	1.10607	5.85353	0.000230034	1.06401	5.85353	0.000474531	2.15259	2.09073	1.02959	darkblue	Contig1765	1.22836	9.40036	8.49e-05	NA	NA	NA	NA	NA	NA	Q96H20	SNF8	Vacuolar-sorting protein SNF8	7.73e-80	242	50.413	Q9CZ28	Snf8	Vacuolar-sorting protein SNF8	8.78e-80	242	50.413	Q5U3V9	snf8	Vacuolar-sorting protein SNF8	3.84e-79	242	48.76	Q9VD72	lsn	Vacuolar-sorting protein SNF8	4.64e-71	244	43.852	Q18258
dd_Smed_v6_17049_0_1	NA	NA	NA	1233	2.43072	1.5761	0.00594214	0.88893	1.5761	0.409704	5.39162	1.8518	2.91155	darkgreen	NA	NA	NA	NA	NA	NA	NA	NA	NA	NA	NA	NA	NA	NA	NA	NA	NA	NA	NA	NA	NA	NA	NA	NA	NA	NA	NA	NA	NA	NA	NA	NA	NA	NA	NA
dd_Smed_v6_1705_0_1	NA	NA	NA	1118	2.03207	6.84357	2.06e-12	2.03749	6.84357	2.16e-12	4.08991	4.1053	0.996252	dodgerblue	Contig82	0.846889	7.7636	0.00245213	NA	10,28,30,31,32,39	Cathepsin+ cell,Intestine,Neural	4,7	NA	NA	NA	NA	NA	NA	NA	NA	NA	NA	NA	NA	NA	NA	NA	NA	NA	NA	NA	NA	NA	NA	NA	NA	NA	NA	NA
dd_Smed_v6_1708_0_1	NA	NA	NA	426	5.57715	5.91904	4.18e-42	5.42488	5.91904	2.19e-40	47.7408	42.9589	1.11131	darkblue	NA	NA	NA	NA	NA	30,39	Intestine,Cathepsin+ cell	4	NA	NA	NA	NA	NA	NA	NA	NA	NA	NA	NA	NA	NA	NA	NA	NA	NA	NA	NA	NA	NA	NA	NA	NA	NA	NA	NA
dd_Smed_v6_1709_0_1	NA	FBP1	Fructose-1,6-bisphosphatase 1	1089	1.21723	6.66613	3.23e-05	1.42681	6.66613	1.06e-06	2.325	2.68851	0.864792	dodgerblue	Contig2420	-0.469639	9.58457	0.00730408	NA	4,6,7,10,13,16,19,31	Cathepsin+ cell,Intestine,Muscle	2,5	NA	NA	P09467	FBP1	Fructose-1,6-bisphosphatase 1	3.84e-154	329	64.134	P70695	Fbp2	Fructose-1,6-bisphosphatase isozyme 2	6.17e-158	323	61.92	Q6PFT1	fbp1a	Fructose-1,6-bisphosphatase 1a	1.93e-163	331	64.35	Q9VIS3	fbp	Fructose-1,6-bisphosphatase	3.95e-157	322	66.77	G5EBJ7
dd_Smed_v6_1714_0_1	NA	EVL	Ena/VASP-like protein	1577	2.04588	4.73129	1.94e-11	1.86987	4.73129	1.04e-09	4.12926	3.655	1.12976	darkblue	Contig6116	1.39792	8.65343	0.00121753	NA	3,17,29,30	Epidermal,Cathepsin+ cell,Protonephridia,Intestine	4	NA	NA	Q9UI08	EVL	Ena/VASP-like protein	2.29e-16	113	39.823	P70429	Evl	Ena/VASP-like protein	8.48e-16	113	38.938	U3JAN8	enah	Enabled homolog (Drosophila)	1.74e-17	119	35.294	Q8T4F7	ena	Protein enabled	3.41e-16	151	35.762	G5EG53
dd_Smed_v6_1726_0_1	cdase	ASAH2	Neutral ceramidase	2436	3.03856	7.74731	3.7e-27	2.24785	7.74731	4.87e-16	8.21669	4.74973	1.72993	green	Contig2188	0.671064	8.93012	0.00926523	uniform subset	10,17,19,28,29,30,31,37,39,41	Cathepsin+ cell,Intestine,Protonephridia,Pharynx	5,8	goblet cells	Cathepsin+ b	Q9NR71	ASAH2	Neutral ceramidase	0	657	48.554	Q9JHE3	Asah2	Neutral ceramidase	0	657	47.793	Q5W7F1	asah2	Neutral ceramidase	0	659	45.675	Q9VA70	CDase	Neutral ceramidase	0	696	46.839	NA
dd_Smed_v6_1727_0_1	NA	VPS29	Vacuolar protein sorting-associated protein 29	716	2.0468	6.36473	4.61e-11	1.79155	6.36473	9.98e-09	4.13188	3.46186	1.19354	darkblue	Contig2859	1.62136	9.92688	0.000126609	NA	10,15,17,28,29,30	Cathepsin+ cell,Protonephridia,Intestine	NA	NA	Cathepsin+ b	Q9UBQ0	VPS29	Vacuolar protein sorting-associated protein 29	1.08e-94	181	67.956	Q9QZ88	Vps29	Vacuolar protein sorting-associated protein 29	4.45e-95	182	67.582	Q7ZV68	vps29	Vacuolar protein sorting-associated protein 29	1.36e-97	182	69.231	Q9VPX5	Vps29	Vacuolar protein sorting-associated protein 29	3.22e-93	181	67.956	Q86D99
dd_Smed_v6_1731_0_1	NA	SLC39A14	Zinc transporter ZIP14	1827	0.405168	4.78723	0.263265	1.14146	4.78723	0.000266493	1.32424	2.20604	0.60028	orange	Contig5021	-1.31367	8.32238	0.000421317	NA	10,19,31	Cathepsin+ cell,Intestine	2,5	pigment	NA	Q15043	SLC39A14	Zinc transporter ZIP14	7.95e-69	398	36.181	Q75N73	Slc39a14	Zinc transporter ZIP14	4.87e-71	437	34.783	A0A0G2KQY6	slc39a14	Zinc transporter ZIP14	5.76e-68	392	34.949	A4IJ72	Zip71B	IP18018p	4.42e-41	304	31.579	U4PS08
dd_Smed_v6_17320_0_1	NA	NA	NA	1579	4.61761	2.01021	1.57e-07	3.82464	2.01021	1.09e-05	24.5493	14.1687	1.73264	green	NA	NA	NA	NA	NA	NA	NA	NA	NA	NA	NA	NA	NA	NA	NA	NA	NA	NA	NA	NA	NA	NA	NA	NA	NA	NA	NA	NA	NA	NA	NA	NA	NA	NA	NA
dd_Smed_v6_1734_0_1	NA	HEL-S-8a	Epididymis secretory sperm binding protein Li 8a	1013	1.2823	6.54893	4.23e-06	1.12667	6.54893	6.91e-05	2.43227	2.18354	1.11391	darkblue	Contig2936	-0.283713	8.15212	0.103633	NA	22	Neoblast	NA	NA	NA	V9HW91	HEL-S-8a	Epididymis secretory sperm binding protein Li 8a	5.19e-114	279	54.839	Q9JHW2	Nit2	Omega-amidase NIT2	2.07e-113	282	54.255	Q66IE6	nit1	Nitrilase 1	9.81e-46	279	33.333	O76464	NitFhit	Nitrilase and fragile histidine triad fusion protein NitFhit	1.84e-43	277	34.296	O76463
dd_Smed_v6_1736_0_1	NA	NA	NA	1227	2.77001	5.88877	1.67e-18	2.52303	5.88877	1.07e-15	6.82112	5.74787	1.18672	darkblue	Contig5171	2.39713	8.41727	7.82e-05	NA	17,30	Cathepsin+ cell,Intestine	4	NA	NA	NA	NA	NA	NA	NA	NA	Q3UMF9	Faxc	Failed axon connections homolog	1.38e-38	241	32.78	NA	NA	NA	NA	NA	NA	Q95RI5	fax	Failed axon connections	1.66e-38	254	33.858	G5EDZ7
dd_Smed_v6_1738_0_1	NA	SLC12A9	Solute carrier family 12 member 9	3319	3.56662	4.98094	5.09e-11	3.2654	4.98094	1.61e-09	11.8484	9.61575	1.23219	darkblue	Contig5531	1.92185	8.89198	4.13e-05	NA	10,17,28,29,30,33,41	Cathepsin+ cell,Protonephridia,Intestine,Neural	4	NA	NA	Q9BXP2	SLC12A9	Solute carrier family 12 member 9	9.92e-162	765	40.915	Q99MR3	Slc12a9	Solute carrier family 12 member 9	1.9e-167	667	45.427	A2BFP5	slc12a9	Solute carrier family 12 member 9	2.38e-146	664	43.524	Q9VJ75	CG10413	GH08340p	3.22e-149	743	42.396	O44846
dd_Smed_v6_1739_0_1	NA	HEL-S-52	Epididymis secretory protein Li 52	2068	1.0186	6.53308	0.000923822	0.671539	6.53308	0.0435271	2.02596	1.59277	1.27197	darkblue	PL06014B1C07	0.162454	7.39673	0.344861	NA	17,24,30	Cathepsin+ cell,Epidermal,Intestine	4	NA	NA	V9HWG7	HEL-S-52	Epididymis secretory protein Li 52	7.13e-158	618	40.291	O88342	Wdr1	WD repeat-containing protein 1	4.34e-159	624	41.026	A0A0G2KJA5	wdr1	WD repeat domain 1	5.11e-77	195	58.974	Q9VU68	flr	Actin-interacting protein 1	0	603	47.43	O17939
dd_Smed_v6_1743_0_1	NA	HACD2	Very-long-chain (3R)-3-hydroxyacyl-CoA dehydratase 2	683	1.656	7.06877	1.38e-08	1.45337	7.06877	8.24e-07	3.15142	2.73848	1.15079	darkblue	Contig2821	0.695915	9.46702	0.00127581	NA	17	Cathepsin+ cell	NA	NA	NA	Q6Y1H2	HACD2	Very-long-chain (3R)-3-hydroxyacyl-CoA dehydratase 2	5.43e-51	178	50.562	Q9D3B1	Hacd2	Very-long-chain (3R)-3-hydroxyacyl-CoA dehydratase 2	6.87e-51	178	49.438	B0V199	hacd2	Very-long-chain (3R)-3-hydroxyacyl-CoA dehydratase	3.07e-48	178	47.753	Q9VKD2	CG6746	Very-long-chain (3R)-3-hydroxyacyl-CoA dehydratase	7.03e-35	204	39.706	O17040
dd_Smed_v6_17442_0_1	NA	NA	NA	335	2.48659	4.66737	8.69e-15	1.86642	4.66737	6.17e-09	5.60454	3.64626	1.53706	green	NA	NA	NA	NA	no_signal	NA	NA	NA	NA	NA	NA	NA	NA	NA	NA	NA	NA	NA	NA	NA	NA	NA	NA	NA	NA	NA	NA	NA	NA	NA	NA	NA	NA	NA	NA
dd_Smed_v6_17481_0_1	NA	NA	NA	591	8.47218	-0.0940374	3.06e-05	7.50122	-0.0940374	0.000173359	355.124	181.172	1.96015	green	NA	NA	NA	NA	NA	30	Intestine	4,7	NA	NA	NA	NA	NA	NA	NA	NA	NA	NA	NA	NA	NA	NA	NA	NA	NA	NA	NA	NA	NA	NA	NA	NA	NA	NA	NA
dd_Smed_v6_1754_0_1	NA	NA	NA	604	5.48041	6.19328	7.27e-50	5.45805	6.19328	1.61e-49	44.6446	43.9578	1.01563	darkblue	Contig3907	0.512101	7.07404	0.0119413	NA	13,30	Muscle,Intestine	4,7	NA	NA	NA	NA	NA	NA	NA	NA	NA	NA	NA	NA	NA	NA	NA	NA	NA	NA	NA	NA	NA	NA	NA	NA	NA	NA	NA
dd_Smed_v6_1757_0_1	NA	NA	NA	2120	2.27686	7.88356	1.03e-13	2.08467	7.88356	1.06e-11	4.84623	4.24179	1.1425	darkblue	Contig2156	1.56517	8.87441	0.000570511	NA	0,5,30,36	Neoblast,Intestine,Neural	4	phagocytes	NA	NA	NA	NA	NA	NA	NA	NA	NA	NA	NA	NA	NA	NA	NA	NA	NA	NA	NA	NA	NA	NA	NA	NA	NA	NA
dd_Smed_v6_1758_0_1	NA	L2HGDH	L-2-hydroxyglutarate dehydrogenase, mitochondrial	1668	1.4064	7.4649	5.34e-07	1.36028	7.4649	1.5e-06	2.65075	2.56736	1.03248	darkblue	Contig5679	1.2367	9.16336	0.000154762	NA	0,5,15,17,22,28,29,30	Neoblast,Cathepsin+ cell,Protonephridia,Intestine	NA	NA	Neoblast	Q9H9P8	L2HGDH	L-2-hydroxyglutarate dehydrogenase, mitochondrial	5.52e-164	403	55.583	Q91YP0	L2hgdh	L-2-hydroxyglutarate dehydrogenase, mitochondrial	5.56e-157	403	53.846	NA	NA	NA	NA	NA	NA	NA	NA	NA	NA	NA	NA	NA
dd_Smed_v6_17590_0_1	NA	NA	NA	1429	4.56559	1.44483	2.48e-06	4.30747	1.44483	8.97e-06	23.6799	19.8005	1.19592	darkblue	NA	NA	NA	NA	NA	36	Neural	NA	NA	NA	NA	NA	NA	NA	NA	NA	NA	NA	NA	NA	NA	NA	NA	NA	NA	NA	NA	NA	Q7JVS8	CG13229-RA	AT19640p	1.57e-18	364	27.747	G5EFX1
dd_Smed_v6_1762_0_1	NA	CHMP6	Charged multivesicular body protein 6	783	1.62839	5.02926	3.16e-07	1.19403	5.02926	0.000257119	3.09167	2.28791	1.35131	darkblue	Contig3012	1.35243	8.86986	0.000921643	NA	NA	NA	NA	NA	NA	Q96FZ7	CHMP6	Charged multivesicular body protein 6	1.07e-45	179	47.486	P0C0A3	Chmp6	Charged multivesicular body protein 6	1.65e-46	197	44.67	NA	NA	NA	NA	NA	NA	Q9W236	Vps20	Vacuolar protein sorting 20, isoform A	7.52e-40	211	44.55	NA
dd_Smed_v6_1767_0_1	NA	BAK1	Bcl-2 homologous antagonist/killer	843	1.00541	7.85183	0.00120302	0.91969	7.85183	0.00386847	2.00752	1.89171	1.06122	darkblue	Contig2592	0.392408	9.21272	0.0155099	NA	3,6,25,35	Epidermal,Intestine,Pharynx	0,7	NA	Early_epithelial_progeny	Q16611	BAK1	Bcl-2 homologous antagonist/killer	1.86e-11	119	30.252	O08734	Bak1	Bcl-2 homologous antagonist/killer	1.51e-13	190	26.842	Q08BX9	zgc:153993	Zgc:153993	2.22e-07	168	25	NA	NA	NA	NA	NA	NA	NA
dd_Smed_v6_1768_0_1	NA	NA	NA	242	1.28011	5.20569	3.61e-06	1.0972	5.20569	9.5e-05	2.42857	2.13939	1.13517	darkblue	NA	NA	NA	NA	NA	NA	NA	NA	NA	NA	NA	NA	NA	NA	NA	NA	Q9D1E7	Serpinb3c	Putative uncharacterized protein	0.000173	50	40	NA	NA	NA	NA	NA	NA	Q7K8Y3	Spn42Da	IP16419p	4.14e-10	50	48	G5EFH4
dd_Smed_v6_1769_0_1	NA	NA	NA	1248	3.51962	8.02072	4.2e-33	3.4667	8.02072	3.09e-32	11.4686	11.0555	1.03736	darkblue	Contig2007	2.10244	9.35412	8.31e-05	NA	6,19,30	Intestine	NA	NA	NA	NA	NA	NA	NA	NA	NA	Q9DCQ2	Aspdh	Putative L-aspartate dehydrogenase	5.46e-60	279	38.71	Q66I59	aspdh	Putative L-aspartate dehydrogenase	1.99e-69	277	39.35	NA	NA	NA	NA	NA	NA	NA
dd_Smed_v6_1773_0_1	NA	GNAI1	Guanine nucleotide-binding protein G(i) subunit alpha-1	1347	3.43255	5.24036	1.52e-15	3.42432	5.24036	2e-15	10.7969	10.7355	1.00572	darkblue	Contig3229	1.64458	7.78283	0.000126609	NA	10,30	Cathepsin+ cell,Intestine	4	NA	NA	P63096	GNAI1	Guanine nucleotide-binding protein G(i) subunit alpha-1	5.47e-141	356	56.742	B2RSH2	Gnai1	Guanine nucleotide-binding protein G(i) subunit alpha-1	6.02e-141	356	56.742	Q7ZW82	gnaia	Guanine nucleotide binding protein (G protein), alpha inhibiting activity polypeptide a	1.42e-139	356	56.461	P20353	Galphai	G protein alpha i subunit	2.8e-136	356	55.899	P51875
dd_Smed_v6_1776_0_1	NA	ATPIF1	ATPase inhibitor, mitochondrial	520	1.26991	5.46382	0.000604025	1.26089	5.46382	0.000763939	2.41146	2.39643	1.00627	darkblue	Contig1218	0.116957	7.44502	0.503204	NA	6,19,22,29,31,40	Intestine,Neoblast,Protonephridia,Cathepsin+ cell	5	NA	Early_epithelial_progeny	Q9UII2	ATPIF1	ATPase inhibitor, mitochondrial	8.26e-05	103	27.184	O35143	Atpif1	ATPase inhibitor, mitochondrial	0.000267	81	30.864	NA	NA	NA	NA	NA	NA	NA	NA	NA	NA	NA	NA	P37209
dd_Smed_v6_1784_0_1	NA	ILVBL	Acetolactate synthase-like protein	2270	0.921696	6.19001	0.00200906	1.00638	6.19001	0.000763939	1.89434	2.00887	0.94299	dodgerblue	Contig6067	0.336625	6.81424	0.0573493	NA	10,19,28	Cathepsin+ cell,Intestine	2	NA	NA	A1L0T0	ILVBL	Acetolactate synthase-like protein	0	625	51.04	Q8BU33	Ilvbl	Acetolactate synthase-like protein	0	624	51.923	Q6NV04	ilvbl	Acetolactate synthase-like protein	0	596	57.047	Q7K3B7	CG11208	LD40177p	7.09e-27	596	25.168	NA
dd_Smed_v6_1785_0_1	NA	NA	NA	654	1.17676	6.6703	0.000717718	1.56997	6.6703	5.16e-06	2.26069	2.96898	0.761437	dodgerblue	Contig1571	1.94278	9.98928	0.000495373	NA	10,28,30	Cathepsin+ cell,Intestine	4	NA	NA	NA	NA	NA	NA	NA	NA	NA	NA	NA	NA	NA	NA	NA	NA	NA	NA	NA	NA	NA	NA	NA	NA	NA	NA	NA
dd_Smed_v6_17873_0_1	NA	NA	NA	798	1.93945	4.09883	4.99e-08	1.80907	4.09883	4.4e-07	3.8356	3.50416	1.09459	darkblue	NA	NA	NA	NA	NA	NA	NA	NA	NA	NA	NA	NA	NA	NA	NA	NA	NA	NA	NA	NA	NA	NA	NA	NA	NA	NA	NA	NA	NA	NA	NA	NA	NA	NA	NA
dd_Smed_v6_1794_0_1	NA	COMTD1	Catechol O-methyltransferase domain-containing protein 1	810	1.46856	6.8327	1.16e-05	1.16487	6.8327	0.00069378	2.76746	2.24213	1.2343	darkblue	Contig1726	0.813691	8.80882	0.00178807	NA	2,3,11,35	Epidermal	0,7	NA	Early_epithelial_progeny	Q86VU5	COMTD1	Catechol O-methyltransferase domain-containing protein 1	3.77e-49	210	40	Q8BIG7	Comtd1	Catechol O-methyltransferase domain-containing protein 1	2.02e-48	211	39.336	Q5BLE6	zgc:113054	Zgc:113054	1.3e-31	226	34.956	NA	NA	NA	NA	NA	NA	Q9XXH0
dd_Smed_v6_1796_0_1	NA	RTN1	Reticulon-1	1903	1.14702	8.04303	6.76e-05	1.11302	8.04303	0.00013086	2.21456	2.16298	1.02384	darkblue	Contig258	1.70575	9.2833	0.000121334	NA	8,9,13,14,17,18,20,21,29,36	Neural,Muscle,Cathepsin+ cell,Protonephridia	4	npp-18+ neurons,otf+ cells 2	Neural 2	Q16799	RTN1	Reticulon-1	8.83e-14	124	27.419	Q8K0T0	Rtn1	Reticulon-1	1.12e-13	124	26.613	Q5BLD3	rtn1a	Reticulon	3.27e-15	182	28.571	Q9VMV9	Rtnl1	Reticulon-like protein	6.58e-12	146	28.082	G5EDI2
dd_Smed_v6_1798_0_1	NA	SYP	Synaptophysin	964	2.80997	6.46546	4.67e-21	2.91	6.46546	2.61e-22	7.01269	7.51619	0.933011	dodgerblue	Contig22	2.71411	10.2559	2.65e-05	NA	10,17,30	Cathepsin+ cell,Intestine	4	NA	NA	P08247	SYP	Synaptophysin	2.27e-30	227	33.48	Q62277	Syp	Synaptophysin	6.7e-28	208	33.654	F1Q7F9	sypl2a	Synaptophysin-like 2a	7.18e-32	208	33.654	NA	NA	NA	NA	NA	NA	O44511
dd_Smed_v6_1799_0_1	NA	NA	NA	583	1.12656	5.68895	0.000165898	1.26309	5.68895	2.43e-05	2.18338	2.40009	0.909705	dodgerblue	NA	NA	NA	NA	NA	NA	NA	NA	NA	NA	NA	NA	NA	NA	NA	NA	NA	NA	NA	NA	NA	NA	NA	NA	NA	NA	NA	NA	NA	NA	NA	NA	NA	NA	NA
dd_Smed_v6_180_0_1	NA	UBE2L3	Ubiquitin-conjugating enzyme E2 L3	1224	1.24062	9.93477	0.00038023	1.03984	9.93477	0.00391252	2.363	2.056	1.14932	darkblue	Contig7160	-0.0896901	7.20804	0.557593	NA	6,17,29,30,37	Intestine,Cathepsin+ cell,Protonephridia,Pharynx	4,7	secretory 1,epidermis DVb,epidermis,phagocytes,psap+ parenchymal cells	NA	P68036	UBE2L3	Ubiquitin-conjugating enzyme E2 L3	3.62e-39	153	42.484	P68037	Ube2l3	Ubiquitin-conjugating enzyme E2 L3	3.99e-39	153	42.484	F1QRD9	ube2l3a	Ubiquitin-conjugating enzyme E2L 3a	7.06e-41	158	43.038	Q7K738	Ubc10	EG:52C10.4 protein	1.77e-40	153	43.791	Q21633
dd_Smed_v6_18010_0_1	NA	NA	NA	1324	4.16369	3.69093	1.22e-14	4.05272	3.69093	5.67e-14	17.9223	16.5955	1.07995	darkblue	NA	NA	NA	NA	NA	19	Intestine	7	NA	NA	NA	NA	NA	NA	NA	NA	NA	NA	NA	NA	NA	NA	NA	NA	NA	NA	NA	NA	A1Z9J3	shot	Short stop, isoform H	0.00069	208	25.962	NA
dd_Smed_v6_1802_0_1	NA	RBCK1	RanBP-type and C3HC4-type zinc finger-containing protein 1	1459	1.15546	6.264	2.65e-05	0.957175	6.264	0.000687416	2.22755	1.9415	1.14733	darkblue	PL06018A1C05	0.45508	6.61125	0.0375203	NA	23,33	Neural	7	NA	NA	Q9BYM8	RBCK1	RanBP-type and C3HC4-type zinc finger-containing protein 1	9.19e-43	242	36.364	Q9WUB0	Rbck1	RanBP-type and C3HC4-type zinc finger-containing protein 1	2.66e-41	242	35.537	A9JTG5	rbck1	RanBP-type and C3HC4-type zinc finger-containing protein 1	1.64e-47	356	29.213	M9PB55	LUBEL	Uncharacterized protein, isoform G	1.06e-06	210	26.19	A8DJA6
dd_Smed_v6_18043_0_1	NA	NA	NA	290	5.03069	2.18611	9.45e-12	5.65269	2.18611	5.73e-14	32.688	50.3073	0.649768	orange	NA	NA	NA	NA	no_signal	NA	NA	NA	NA	NA	NA	NA	NA	NA	NA	NA	NA	NA	NA	NA	NA	NA	NA	NA	NA	NA	NA	NA	NA	NA	NA	NA	NA	NA	NA
dd_Smed_v6_18077_0_1	NA	B3GNT5	Lactosylceramide 1,3-N-acetyl-beta-D-glucosaminyltransferase	1097	1.49682	2.2875	0.0247946	1.92829	2.2875	0.00345226	2.82221	3.80603	0.741509	dodgerblue	NA	NA	NA	NA	NA	NA	NA	NA	NA	NA	Q9BYG0	B3GNT5	Lactosylceramide 1,3-N-acetyl-beta-D-glucosaminyltransferase	2.2e-40	233	36.91	Q8BGY6	B3gnt5	Lactosylceramide 1,3-N-acetyl-beta-D-glucosaminyltransferase	3.87e-39	233	35.193	NA	NA	NA	NA	NA	NA	Q9VZA6	BcDNA:GM04393	Hexosyltransferase	3.45e-33	269	30.112	Q8MQG4
dd_Smed_v6_1808_0_1	NA	NA	NA	1130	1.24926	6.82111	5.09e-06	0.958062	6.82111	0.000681331	2.37719	1.9427	1.22366	darkblue	Contig1063	0.887169	9.0115	0.000872092	NA	24,27,30,37	Epidermal,Pharynx,Intestine	4	NA	NA	NA	NA	NA	NA	NA	NA	NA	NA	NA	NA	NA	NA	NA	NA	NA	NA	NA	NA	Q7JZI2	Tsp74F	Tetraspanin	3.39e-08	121	30.579	NA
dd_Smed_v6_182_0_1	NA	NA	NA	1569	6.93788	9.75917	3.62e-68	6.15583	9.75917	7.11e-58	122.605	71.3	1.71957	green	Contig7102	0.0837135	6.21428	0.509055	no_signal	19	Intestine	5,8	goblet cells	NA	NA	NA	NA	NA	NA	NA	NA	NA	NA	NA	NA	NA	NA	NA	NA	NA	NA	NA	NA	NA	NA	NA	NA	NA	NA
dd_Smed_v6_18214_0_1	NA	NA	NA	1267	3.01657	1.92708	0.00156482	3.24403	1.92708	0.000780647	8.0924	9.47439	0.854134	dodgerblue	NA	NA	NA	NA	NA	NA	NA	NA	NA	NA	NA	NA	NA	NA	NA	NA	NA	NA	NA	NA	NA	NA	NA	NA	NA	NA	NA	NA	NA	NA	NA	NA	NA	NA	NA
dd_Smed_v6_1823_0_1	NA	SLC25A20	Mitochondrial carnitine/acylcarnitine carrier protein	529	2.29084	6.37716	1.84e-14	1.87529	6.37716	3.83e-10	4.89342	3.66876	1.33381	darkblue	Contig3880	0.484189	7.73307	0.00416941	NA	3,31	Epidermal,Cathepsin+ cell	NA	NA	NA	C9JPE1	SLC25A20	Mitochondrial carnitine/acylcarnitine carrier protein	7.07e-65	142	64.085	Q9Z2Z6	Slc25a20	Mitochondrial carnitine/acylcarnitine carrier protein	9.14e-64	144	63.194	Q6P5K6	slc25a20	Solute carrier family 25 (Carnitine/acylcarnitine translocase), member 20	4.26e-67	150	64	Q9VQG4	colt	Congested-like trachea protein	1.08e-50	144	50.694	Q27257
dd_Smed_v6_1825_0_1	NA	LACTB2	Endoribonuclease LACTB2	840	2.91551	1.79081	0.00120349	3.78145	1.79081	3.75e-05	7.54492	13.7508	0.548688	orange	Contig3980	0.0592797	8.47748	0.489854	NA	NA	NA	NA	NA	NA	Q53H82	LACTB2	Endoribonuclease LACTB2	4.5e-05	180	25.556	Q8BWY4	Mblac1	Metallo-beta-lactamase domain-containing protein 1	6.1e-35	171	40.936	Q6NYF0	lactb2	Endoribonuclease LACTB2	1.93e-05	194	25.258	NA	NA	NA	NA	NA	NA	O17598
dd_Smed_v6_1827_0_1	NA	NPTN	Neuroplastin	1404	0.901441	6.078	0.00141583	1.08421	6.078	0.000109266	1.86793	2.12021	0.881013	dodgerblue	Contig1035	0.531244	9.04511	0.0120004	NA	19,27,37	Intestine,Pharynx	2,5	NA	NA	Q9Y639	NPTN	Neuroplastin	3.17e-09	191	30.366	P97300	Nptn	Neuroplastin	1.98e-06	195	28.718	A4JYM3	jam2a	cDNA, clone cssl:d0187	4.82e-06	225	23.111	Q8IPG9	Bsg	Basigin, isoform A	0.000307	136	30.147	NA
dd_Smed_v6_1829_0_1	NA	NA	NA	1990	2.72559	5.41595	2.96e-15	2.61029	5.41595	4.06e-14	6.61432	6.10625	1.0832	darkblue	Contig2643	2.2229	9.92231	0.000406185	NA	10,17,28,29,30	Cathepsin+ cell,Protonephridia,Intestine	4	NA	NA	NA	NA	NA	NA	NA	NA	Q9DC37	Mfsd1	Major facilitator superfamily domain-containing protein 1	1.8e-155	462	53.247	NA	NA	NA	NA	NA	NA	NA	NA	NA	NA	NA	NA	NA
dd_Smed_v6_1830_0_1	NA	PARD6B	Partitioning defective 6 homolog beta	1226	1.33285	4.26009	0.00325197	1.35116	4.26009	0.00321611	2.519	2.55117	0.987393	dodgerblue	Contig3688	0.804207	9.00294	0.000826022	NA	26	Protonephridia	NA	NA	NA	Q9BYG5	PARD6B	Partitioning defective 6 homolog beta	7.09e-74	240	55.833	Q9JK83	Pard6b	Partitioning defective 6 homolog beta	7.58e-74	240	55.833	F1R754	pard6b	Par-6 partitioning defective 6 homolog beta (C. elegans)	4.85e-72	239	54.393	O97111	par-6	LD29223p	8.27e-79	243	60.494	Q9NAN2
dd_Smed_v6_1835_0_1	NA	BRK1	Protein BRICK1	420	1.35413	5.06478	0.000131377	1.29077	5.06478	0.000323819	2.55643	2.44659	1.04489	darkblue	Contig1637	1.00399	8.5067	0.000817823	NA	26	Protonephridia	NA	NA	NA	Q8WUW1	BRK1	Protein BRICK1	1.2e-19	63	50.794	Q91VR8	Brk1	Protein BRICK1	5.31e-20	63	52.381	Q6IQ86	brk1	Probable protein BRICK1	7.73e-20	63	52.381	Q8MLQ0	HSPC300	FI14118p	8.3e-19	63	50.794	NA
dd_Smed_v6_1836_0_1	NA	ATP6V1G2	V-type proton ATPase subunit G 2	654	1.33569	6.461	3.22e-07	1.32308	6.461	4.92e-07	2.52397	2.502	1.00878	darkblue	Contig1130	2.03422	9.32733	0.000132083	NA	17,30	Cathepsin+ cell,Intestine	4	NA	NA	O95670	ATP6V1G2	V-type proton ATPase subunit G 2	2.03e-09	115	35.652	Q9WTT4	Atp6v1g2	V-type proton ATPase subunit G 2	2.42e-09	115	35.652	NA	NA	NA	NA	NA	NA	Q9XZH6	Vha13	V-type proton ATPase subunit G	4.8e-06	114	35.088	P91303
dd_Smed_v6_184_0_1	NA	NA	NA	1021	2.55374	10.6321	2.1e-11	2.50275	10.6321	5.98e-11	5.87154	5.66765	1.03597	darkblue	Contig3562	3.33768	9.87486	5.55e-05	NA	10,17,28,30,31,39	Cathepsin+ cell,Intestine	4	phagocytes,aqp+ parenchymal cells,ldlrr-1+ parenchymal cells,psap+ parenchymal cells	Gut	NA	NA	NA	NA	NA	NA	NA	NA	NA	NA	NA	NA	NA	NA	NA	NA	NA	NA	NA	NA	NA	NA	NA	NA	NA
dd_Smed_v6_1840_0_1	NA	ATP6AP1	V-type proton ATPase subunit S1	818	2.45673	7.13741	4.51e-15	2.35529	7.13741	5.92e-14	5.48969	5.11698	1.07284	darkblue	PL030008A20F11	2.09728	10.0192	0.00112173	NA	10,17,28,30	Cathepsin+ cell,Intestine	4	NA	NA	Q15904	ATP6AP1	V-type proton ATPase subunit S1	4.7e-15	109	35.78	Q9R1Q9	Atp6ap1	V-type proton ATPase subunit S1	1.76e-16	107	37.383	Q5U3H5	atp6ap1b	ATPase, H+ transporting, lysosomal accessory protein 1	7.97e-18	213	28.169	Q7JR49	VhaAC45	LD09158p	1.09e-09	115	34.783	Q9TYW1
dd_Smed_v6_1846_0_1	NA	KY	Kyphoscoliosis peptidase	2410	1.46813	2.58256	0.00815965	0.799713	2.58256	0.207357	2.76663	1.74076	1.58933	green	NA	NA	NA	NA	NA	NA	NA	NA	NA	NA	Q8NBH2	KY	Kyphoscoliosis peptidase	3.81e-38	444	27.027	Q8C8H8	Ky	Kyphoscoliosis peptidase	2.71e-40	446	27.578	NA	NA	NA	NA	NA	NA	Q0E908	Hil	Hillarin	1.03e-78	496	31.452	G5EF51
dd_Smed_v6_185_0_1	NA	NA	NA	601	6.67766	11.6975	7.65e-65	5.95614	11.6975	2.79e-55	102.371	62.0835	1.64892	green	Contig2228	-0.840204	11.1447	0.00947725	NA	NA	NA	8	goblet cells	NA	NA	NA	NA	NA	NA	NA	NA	NA	NA	NA	NA	NA	NA	NA	NA	NA	NA	NA	NA	NA	NA	NA	NA	NA	NA
dd_Smed_v6_1850_0_1	NA	NA	NA	627	1.54031	3.84861	7.48e-06	1.42382	3.84861	4.23e-05	2.90857	2.68294	1.0841	darkblue	Contig7543	1.07748	8.3883	0.000989852	NA	NA	NA	NA	NA	NA	NA	NA	NA	NA	NA	NA	NA	NA	NA	NA	NA	NA	NA	NA	NA	NA	NA	NA	NA	NA	NA	NA	NA	NA	NA
dd_Smed_v6_18502_0_1	NA	NA	NA	1047	9.89047	1.313	4.25e-14	9.07041	1.313	3.62e-12	949.135	537.607	1.76548	green	NA	NA	NA	NA	NA	NA	NA	NA	NA	NA	NA	NA	NA	NA	NA	NA	NA	NA	NA	NA	NA	NA	NA	NA	NA	NA	NA	NA	NA	NA	NA	NA	NA	NA	NA
dd_Smed_v6_18520_0_1	NA	TRAF4	TNF receptor-associated factor 4	382	2.12474	1.82892	0.00882858	0.835444	1.82892	0.396875	4.36125	1.78441	2.44409	darkgreen	NA	NA	NA	NA	NA	NA	NA	NA	NA	NA	Q9BUZ4	TRAF4	TNF receptor-associated factor 4	1.61e-05	55	32.727	Q61382	Traf4	TNF receptor-associated factor 4	2.3e-05	55	30.909	Q6DEG0	traf3	TNF receptor-associated factor 3	1.23e-05	73	34.247	NA	NA	NA	NA	NA	NA	G5EG80
dd_Smed_v6_1856_0_1	NA	FAM49B	Protein FAM49B	1474	1.88651	5.57046	3.67e-10	1.70505	5.57046	1.83e-08	3.69739	3.26041	1.13403	darkblue	Contig2300	1.77252	8.73973	0.000133894	NA	10,15,17,28,29,30,37,39,41	Cathepsin+ cell,Protonephridia,Intestine,Pharynx	4	aqp+ parenchymal cells	NA	Q9NUQ9	FAM49B	Protein FAM49B	2.71e-89	328	46.341	Q921M7	Fam49b	Protein FAM49B	6.01e-89	328	46.037	Q6DC29	fam49a	Family with sequence similarity 49, member A	2.57e-90	328	45.732	Q7K1H0	Dmel\CG32066	GH09096p	4.53e-77	336	41.071	Q09387
dd_Smed_v6_1858_0_1	NA	MTHFD1	C-1-tetrahydrofolate synthase, cytoplasmic	4286	1.03957	6.73595	0.00024464	1.26971	6.73595	6.62e-06	2.05562	2.41113	0.852553	dodgerblue	Contig950	0.147435	6.68702	0.354018	NA	6,19	Intestine	7	NA	NA	P11586	MTHFD1	C-1-tetrahydrofolate synthase, cytoplasmic	0	926	63.715	Q922D8	Mthfd1	C-1-tetrahydrofolate synthase, cytoplasmic	0	926	62.743	F1QXP5	mthfd1b	Methylenetetrahydrofolate dehydrogenase (NADP+-dependent) 1b	0	933	60.665	O96553	pug	C-1-tetrahydrofolate synthase, cytoplasmic	0	936	54.808	Q21284
dd_Smed_v6_1860_0_1	NA	NA	NA	1669	2.44514	6.47879	3.36e-15	2.65486	6.47879	1.85e-17	5.4458	6.29786	0.864706	dodgerblue	NA	NA	NA	NA	NA	30	Intestine	NA	NA	NA	NA	NA	NA	NA	NA	NA	NA	NA	NA	NA	NA	NA	NA	NA	NA	NA	NA	NA	NA	NA	NA	NA	NA	NA	NA
dd_Smed_v6_1865_0_1	NA	C10orf11	Leucine-rich repeat-containing protein C10orf11	911	2.15895	5.53055	1.11e-14	2.27878	5.53055	4.34e-16	4.46588	4.85266	0.920296	dodgerblue	PL030013A10D05	1.91462	8.31943	0.000956733	NA	28,30	Cathepsin+ cell,Intestine	NA	NA	NA	Q9H2I8	C10orf11	Leucine-rich repeat-containing protein C10orf11	2.21e-21	254	33.465	Q9D9B4	-	Leucine-rich repeat-containing protein C10orf11 homolog	2.72e-21	252	32.54	Q501Y0	c13h10orf11	C10orf11 homolog (H. sapiens)	8.83e-26	244	31.557	NA	NA	NA	NA	NA	NA	NA
dd_Smed_v6_1874_0_1	NA	SLC17A5	Sialin	2032	2.87412	5.38259	4.49e-10	3.12575	5.38259	1.83e-11	7.33153	8.72859	0.839945	dodgerblue	Contig3687	2.54003	9.13616	2.44e-05	NA	10,17,28,30,40,41	Cathepsin+ cell,Intestine,Protonephridia	4	NA	NA	Q9NRA2	SLC17A5	Sialin	1.78e-111	467	46.039	Q8BFU8	Slc17a8	Vesicular glutamate transporter 3	1.19e-103	487	40.657	F1R043	slc17a5	Solute carrier family 17 (acidic sugar transporter), member 5	3.09e-114	465	45.376	Q9VYG7	MFS10	FI19708p1	1.34e-109	487	41.478	Q03567
dd_Smed_v6_1884_1_1	NA	HGSNAT	Heparan-alpha-glucosaminide N-acetyltransferase	2075	2.14584	4.79031	7.12e-11	2.07553	4.79031	3.34e-10	4.4255	4.21498	1.04995	darkblue	PL030004A20F10	0.785888	7.61397	0.00918821	NA	10,15,17	Cathepsin+ cell	4	NA	NA	Q68CP4	HGSNAT	Heparan-alpha-glucosaminide N-acetyltransferase	1.81e-89	537	35.754	Q3UDW8	Hgsnat	Heparan-alpha-glucosaminide N-acetyltransferase	4.22e-92	537	35.568	F1Q893	hgsnat	Heparan-alpha-glucosaminide N-acetyltransferase	7.49e-96	628	33.599	Q9W4F7	CG6903	CG6903, isoform A	2.14e-73	435	37.471	NA
dd_Smed_v6_1889_0_1	NA	ETFA	Electron transfer flavoprotein subunit alpha, mitochondrial	555	1.10958	6.77019	6.71e-05	0.902947	6.77019	0.00165664	2.15783	1.86988	1.15399	darkblue	Contig5577	0.542793	8.1613	0.00970674	NA	NA	NA	NA	NA	NA	H0YK49	ETFA	Electron transfer flavoprotein subunit alpha, mitochondrial	1.18e-69	167	68.862	Q99LC5	Etfa	Electron transfer flavoprotein subunit alpha, mitochondrial	4.36e-65	167	67.665	Q7ZUS9	etfa	Electron-transfer-flavoprotein, alpha polypeptide	1.87e-70	166	72.289	Q7KN94	wal	Putative uncharacterized protein	2.03e-69	167	70.06	Q93615
dd_Smed_v6_1890_0_1	NA	NA	NA	668	1.60149	4.29724	0.00483004	1.70197	4.29724	0.00296943	3.03457	3.25346	0.932721	dodgerblue	Contig141	0.8059	9.29743	0.0041879	NA	NA	NA	NA	NA	NA	NA	NA	NA	NA	NA	NA	NA	NA	NA	NA	NA	NA	NA	NA	NA	NA	NA	NA	Q9VTM6	crim	Crimpled	5.78e-06	70	40	NA
dd_Smed_v6_1894_0_1	NA	PLD3	Phospholipase D3	1670	2.0731	5.22702	5.54e-08	2.26019	5.22702	3.71e-09	4.20789	4.79053	0.878377	dodgerblue	Contig2603	1.75891	8.71238	4.77e-05	NA	4,10,15,17,28,30,31	Cathepsin+ cell,Intestine	4	NA	NA	Q8IV08	PLD3	Phospholipase D3	1.4e-91	410	39.024	O35405	Pld3	Phospholipase D3	1.61e-89	409	39.609	NA	NA	NA	NA	NA	NA	Q9VIE9	CG43346-RA	LD39232p1	3.65e-63	412	33.738	NA
dd_Smed_v6_1895_0_1	NA	RIDA	2-iminobutanoate/2-iminopropanoate deaminase	527	2.23712	7.04535	3.53e-15	2.19084	7.04535	1.42e-14	4.71456	4.5657	1.03261	darkblue	Contig6937	0.47331	9.02701	0.318421	NA	6,10,19,30,31	Intestine,Cathepsin+ cell	7	NA	NA	P52758	RIDA	2-iminobutanoate/2-iminopropanoate deaminase	1.79e-57	132	59.848	P52760	Rida	2-iminobutanoate/2-iminopropanoate deaminase	1.73e-54	130	61.538	Q6AXL2	hrsp12	Heat-responsive protein 12	3.65e-52	134	56.716	Q9V3W0	UK114	RutC family protein UK114	2.37e-41	133	48.872	NA
dd_Smed_v6_1896_0_1	NA	OAT	Ornithine aminotransferase, mitochondrial	1516	1.80716	6.34362	9.21e-11	1.83372	6.34362	5.75e-11	3.49954	3.56456	0.981758	dodgerblue	PL06023B2C07	-0.493501	7.75464	0.269361	NA	12,19,38	Parapharyngeal,Intestine	2,3,5	goblet cells	NA	P04181	OAT	Ornithine aminotransferase, mitochondrial	0	396	68.687	P29758	Oat	Ornithine aminotransferase, mitochondrial	0	398	67.839	F1QV62	oat	Ornithine aminotransferase	0	346	71.098	Q9VW26	Oat	Ornithine aminotransferase, mitochondrial	0	399	68.922	Q18040
dd_Smed_v6_1897_0_1	NA	NEK4	Serine/threonine-protein kinase Nek4	2088	1.04736	6.32684	9.79e-05	1.05889	6.32684	9.35e-05	2.06675	2.08332	0.992044	dodgerblue	Contig5760	0.861977	7.98277	0.00549419	NA	6,10,11,15,17,19,24,28,29,30,31,39,40,41	Intestine,Cathepsin+ cell,Epidermal,Protonephridia	7	late epidermal progenitors 2,phagocytes,aqp+ parenchymal cells,ldlrr-1+ parenchymal cells,psap+ parenchymal cells	Cathepsin+ b	P51957	NEK4	Serine/threonine-protein kinase Nek4	4.35e-10	190	27.368	Q9Z1J2	Nek4	Serine/threonine-protein kinase Nek4	1.76e-09	190	26.842	X1WHM4	zgc:194282	Tyrosine-protein kinase	5.05e-10	155	27.742	D3DMF6	wnd	Mitogen-activated protein kinase kinase kinase	5.8e-10	214	27.103	G8JY36
dd_Smed_v6_18975_0_1	NA	SLC16A4	Monocarboxylate transporter 5	2034	5.11567	3.3812	5.58e-23	5.41979	3.3812	3.89e-25	34.6714	42.8076	0.809936	dodgerblue	NA	NA	NA	NA	NA	NA	NA	NA	NA	NA	O15374	SLC16A4	Monocarboxylate transporter 5	4.43e-26	530	22.453	Q8R0M8	Slc16a4	Monocarboxylate transporter 5	1.34e-31	534	23.596	F1QW16	slc16a4	Solute carrier family 16, member 4	2.72e-34	529	24.386	Q7K1L4	CG8468	CG8468, isoform A	5.51e-22	186	30.645	O17328
dd_Smed_v6_19_0_1	novel	NA	NA	530	5.30275	10.4661	1.35e-19	4.90716	10.4661	1.9e-17	39.4717	30.0055	1.31548	darkblue	Contig663	-0.168188	8.46277	0.544336	basal low	NA	NA	5	NA	NA	NA	NA	NA	NA	NA	NA	NA	NA	NA	NA	NA	NA	NA	NA	NA	NA	NA	NA	NA	NA	NA	NA	NA	NA	NA
dd_Smed_v6_190_0_1	NA	EPPIN	Eppin	337	5.66106	9.1152	1.74e-48	6.70298	9.1152	2.85e-61	50.5999	104.184	0.48568	darkorange	Contig7379	-1.31677	9.3093	0.00607657	NA	NA	NA	8	goblet cells	NA	O95925	EPPIN	Eppin	1.23e-07	68	33.824	Q3UW09	Spint3	Putative uncharacterized protein	1.02e-10	81	39.506	F1QXZ6	spint1b	Serine peptidase inhibitor, Kunitz type 1 b	1.25e-06	66	33.333	Q868Z9	Ppn	Papilin	7.7e-09	52	44.231	H2KZ67
dd_Smed_v6_1904_0_1	NA	SLC37A3	Sugar phosphate exchanger 3	1767	2.436	5.5612	1.48e-13	2.11178	5.5612	1.53e-10	5.41138	4.32223	1.25199	darkblue	Contig5470	1.41132	8.6412	5.77e-05	NA	17,28,30	Cathepsin+ cell,Intestine	4	NA	NA	Q8NCC5	SLC37A3	Sugar phosphate exchanger 3	6.41e-128	481	48.649	Q3TIT8	Slc37a3	Sugar phosphate exchanger 3	1.99e-132	479	49.478	Q7SY29	slc37a2	Glucose-6-phosphate exchanger SLC37A2	2.74e-57	438	35.388	NA	NA	NA	NA	NA	NA	H2FLL9
dd_Smed_v6_1915_0_1	NA	ATG3	Ubiquitin-like-conjugating enzyme ATG3	1205	1.99786	7.06596	4.49e-10	1.688	7.06596	1.7e-07	3.99406	3.22209	1.23959	darkblue	Contig4580	1.35947	8.09951	0.000232768	NA	8,9,17,21,23,33	Neural,Cathepsin+ cell	4	NA	Cathepsin+ b	Q9NT62	ATG3	Ubiquitin-like-conjugating enzyme ATG3	2.93e-108	327	54.74	Q9CPX6	Atg3	Ubiquitin-like-conjugating enzyme ATG3	1.25e-109	325	53.846	Q6PFS7	atg3	Ubiquitin-like-conjugating enzyme ATG3	2.43e-117	325	56.615	Q9VVS6	Atg3	Autophagy-related protein 3	9.88e-108	338	51.479	Q9N369
dd_Smed_v6_1916_0_1	NA	CHL1	Neural cell adhesion molecule L1-like protein	4498	1.03801	5.94715	0.000248305	0.635588	5.94715	0.0392637	2.0534	1.55357	1.32173	darkblue	PL08005B1E08	0.64429	7.90941	0.00685018	NA	20,23,24,27,30,33,37,40	Neural,Epidermal,Pharynx,Intestine,Protonephridia	4	NA	NA	O00533	CHL1	Neural cell adhesion molecule L1-like protein	1.79e-93	891	28.395	P70232	Chl1	Neural cell adhesion molecule L1-like protein	1.62e-92	845	28.639	F1QGN2	cntn4	Contactin 4	2.05e-68	779	26.701	P20241	Nrg	Neuroglian	1.14e-114	872	31.651	G5ECX2
dd_Smed_v6_19217_0_1	NA	TRAF5	TNF receptor-associated factor 5	1485	4.60506	1.61416	4.84e-06	4.27291	1.61416	2.16e-05	24.3367	19.3319	1.25889	darkblue	NA	NA	NA	NA	NA	NA	NA	NA	NA	NA	O00463	TRAF5	TNF receptor-associated factor 5	4.82e-10	326	21.166	P39429	Traf2	TNF receptor-associated factor 2	4.65e-06	49	42.857	Q6DEG0	traf3	TNF receptor-associated factor 3	0.000629	50	38	Q9W3I9	Traf6	GH01161p	0.000684	132	25	NA
dd_Smed_v6_1923_0_1	NA	SMAD4	Mothers against decapentaplegic homolog	3418	1.09221	5.45731	0.000173674	1.0327	5.45731	0.000471955	2.13201	2.04585	1.04211	darkblue	Contig6291	1.15914	8.66419	0.00147094	NA	31	Cathepsin+ cell	NA	NA	NA	K7EIU8	SMAD4	Mothers against decapentaplegic homolog	8.33e-94	233	66.953	P97471	Smad4	Mothers against decapentaplegic homolog 4	1.74e-92	233	66.953	Q9I9P4	smad4a	Transcription factor Smad4	1.08e-92	233	65.665	Q8IMG6	Med	Mothers against decapentaplegic homolog	5.44e-94	235	67.234	P45897
dd_Smed_v6_1924_1_1	NA	OSTM1	Osteopetrosis-associated transmembrane protein 1	1204	2.04601	5.01022	8.61e-11	1.78641	5.01022	1.79e-08	4.12961	3.44955	1.19715	darkblue	Contig2851	1.94576	8.90633	3.12e-05	NA	10,17,28,30	Cathepsin+ cell,Intestine	4	NA	NA	Q86WC4	OSTM1	Osteopetrosis-associated transmembrane protein 1	4.48e-15	244	24.18	Q8BGT0	Ostm1	Osteopetrosis-associated transmembrane protein 1	7.74e-14	251	23.506	NA	NA	NA	NA	NA	NA	Q95SH7	Dmel\CG14969	GH26007p	5.28e-11	253	25.296	NA
dd_Smed_v6_1926_0_1	NA	PRSS12	Neurotrypsin	3752	5.45844	7.71256	2.12e-68	5.23192	7.71256	3.63e-64	43.9697	37.5808	1.17001	darkblue	PL08010A1D03	0.0692112	8.06437	0.710717	NA	6,30	Intestine	0,7	phagocytes	Gut	P56730	PRSS12	Neurotrypsin	5.11e-90	559	34.347	O08762	Prss12	Neurotrypsin	3.27e-90	561	34.225	F1QV56	zgc:92313	Zgc:92313	3.91e-42	262	34.733	Q9U1I3	teq	GRAAL protein	2.08e-98	610	34.754	Q17800
dd_Smed_v6_1934_0_1	NA	NEURL1B	E3 ubiquitin-protein ligase NEURL1B	1548	1.24574	5.69896	4.48e-06	1.05058	5.69896	0.000146707	2.37141	2.07136	1.14486	darkblue	Contig5498	0.821539	7.65021	0.00184667	NA	13	Muscle	NA	NA	NA	A8MQ27	NEURL1B	E3 ubiquitin-protein ligase NEURL1B	1.66e-21	231	29.87	Q923S6	Neurl1	E3 ubiquitin-protein ligase NEURL1	9.65e-22	256	26.562	Q08CE8	neurl1ab	Zgc:153175	1.17e-20	506	22.332	P29503	neur	Protein neuralized	1.6e-22	157	31.21	Q17911
dd_Smed_v6_1937_0_1	NA	TOLLIP	Toll-interacting protein	1383	1.12123	5.71334	0.000111178	1.04816	5.71334	0.000376532	2.17533	2.0679	1.05195	darkblue	Contig340	0.840758	9.03341	0.00151087	NA	NA	NA	NA	NA	NA	Q9H0E2	TOLLIP	Toll-interacting protein	1.14e-51	276	37.681	Q9QZ06	Tollip	Toll-interacting protein	3.66e-50	275	38.545	Q7ZV43	tollip	Toll-interacting protein	2.88e-53	274	37.591	NA	NA	NA	NA	NA	NA	Q93565
dd_Smed_v6_1938_0_1	NA	NA	NA	863	1.43447	6.71672	0.00063459	1.2835	6.71672	0.00283807	2.70283	2.43428	1.11032	darkblue	Contig680	0.70564	9.29116	0.0740011	NA	2,6,15,22,25,33,35	Epidermal,Intestine,Cathepsin+ cell,Neoblast,Pharynx,Neural	7	NA	NA	NA	NA	NA	NA	NA	NA	NA	NA	NA	NA	NA	NA	NA	NA	NA	NA	NA	NA	NA	NA	NA	NA	NA	NA	NA
dd_Smed_v6_1939_0_1	NA	GCSH	Glycine cleavage system H protein	1488	1.23857	5.3734	0.00262017	1.17063	5.3734	0.00538437	2.35965	2.25111	1.04822	darkblue	Contig1229	0.314955	8.44984	0.0611545	NA	10,17,31	Cathepsin+ cell	NA	NA	NA	Q53XL7	GCSH	Glycine cleavage system H protein	6.9e-42	132	50	Q91WK5	Gcsh	Glycine cleavage system H protein, mitochondrial	7.19e-41	131	49.618	E7FBZ9	si:ch211-141o9.10	Si:ch211-141o9.10	1.67e-100	292	49.315	Q9U616	ppl	Glycine cleavage system H protein, mitochondrial	1.96e-39	138	47.826	Q10002
dd_Smed_v6_194_0_1	apob-2	MUC2	Mucin-2	17568	6.17213	10.9109	6.48e-58	6.10603	10.9109	5.54e-57	72.1103	68.881	1.04688	darkblue	PL06019B1E01	2.28488	8.06221	0.000625496	uniform	30	Intestine	4	phagocytes	Gut	Q02817	MUC2	Mucin-2	6.7e-06	166	28.916	E9Q414	Apob	Apolipoprotein B-100	7.7e-19	719	22.392	Q5TZ29	apobb.1	Apolipoprotein Bb, tandem duplicate 1	6.77e-17	993	20.846	Q7KTG2	Apoltp	Apolipoprotein lipid transfer particle	2.81e-44	595	27.395	NA
dd_Smed_v6_1941_0_1	NA	NA	NA	779	3.09722	6.57022	5.89e-24	2.87681	6.57022	4.57e-21	8.55767	7.34522	1.16507	darkblue	NA	NA	NA	NA	NA	10,30	Cathepsin+ cell,Intestine	4	NA	NA	NA	NA	NA	NA	NA	NA	NA	NA	NA	NA	NA	NA	NA	NA	NA	NA	NA	NA	NA	NA	NA	NA	NA	NA	NA
dd_Smed_v6_19414_0_1	NA	-	Heat shock 70kDa protein 8 isoform 2 variant	860	3.85183	2.08744	1.35e-07	3.44735	2.08744	2.28e-06	14.4383	10.9083	1.32361	darkblue	NA	NA	NA	NA	NA	NA	NA	NA	NA	NA	Q53HF2	-	Heat shock 70kDa protein 8 isoform 2 variant	7.35e-123	204	85.294	P63017	Hspa8	Heat shock cognate 71 kDa protein	6.67e-121	204	85.294	F1QGH3	hsp70.1	Heat shock cognate 70-kd protein, tandem duplicate 1	1.79e-122	199	85.427	P29843	Hsc70-1	Heat shock 70 kDa protein cognate 1	6.23e-118	199	83.417	P09446
dd_Smed_v6_1942_0_1	NA	MAN2B1	Lysosomal alpha-mannosidase	3176	2.56637	5.7054	3.77e-15	2.60666	5.7054	1.68e-15	5.92317	6.09093	0.972456	dodgerblue	Contig5520	0.908077	6.72437	0.0295122	NA	10,17,28,30,39,42	Cathepsin+ cell,Intestine	4	NA	Gut	O00754	MAN2B1	Lysosomal alpha-mannosidase	0	985	40.406	O09159	Man2b1	Lysosomal alpha-mannosidase	0	999	40.04	F1QTT0	man2b1	Alpha-mannosidase	0	988	43.826	Q9VKV1	LManII	Alpha-mannosidase	0	992	41.129	Q20829
dd_Smed_v6_1961_0_1	NA	ARCN1	Coatomer subunit delta	1778	1.17867	4.58321	0.00467883	1.04845	4.58321	0.0148833	2.26368	2.06831	1.09446	darkblue	Contig3529	0.124525	8.4319	0.444415	NA	2,3	Epidermal	NA	NA	Early_epithelial_progeny	P48444	ARCN1	Coatomer subunit delta	1.52e-171	535	51.963	Q5XJY5	Arcn1	Coatomer subunit delta	3.99e-171	535	51.963	NA	NA	NA	NA	NA	NA	Q9W555	deltaCOP	Coatomer subunit delta	5.36e-146	552	47.101	NA
dd_Smed_v6_1976_0_1	NA	ATP6V0D1	V-type proton ATPase subunit d 1	1613	1.73171	8.11194	9.14e-09	1.61322	8.11194	1.08e-07	3.32121	3.05933	1.0856	darkblue	Contig5406	2.00978	9.23157	0.000502705	NA	8,17,20,30	Neural,Cathepsin+ cell,Intestine	4	NA	Cluster 11	P61421	ATP6V0D1	V-type proton ATPase subunit d 1	0	346	73.988	P51863	Atp6v0d1	V-type proton ATPase subunit d 1	0	346	74.277	Q6PGV1	atp6v0d1	V-type proton ATPase subunit d 1	0	346	74.566	Q9W4P5	VhaAC39-1	V-type proton ATPase subunit d 1	0	348	76.437	Q95YD5
dd_Smed_v6_1977_0_1	NA	ELOVL4	Elongation of very long chain fatty acids protein 4	1079	2.03168	5.26728	3.66e-11	2.02554	5.26728	4.91e-11	4.08882	4.07145	1.00427	darkblue	Contig2891	0.646801	8.61303	0.00239524	NA	2,3,6,35	Epidermal,Intestine	0	NA	NA	Q9GZR5	ELOVL4	Elongation of very long chain fatty acids protein 4	1.21e-54	246	37.805	Q9EQC4	Elovl4	Elongation of very long chain fatty acids protein 4	1.48e-53	246	36.179	A9C3R2	elovl7a	Elongation of very long chain fatty acids protein 7	1.17e-57	249	40.161	Q9VCY5	CG33110-RA	Elongation of very long chain fatty acids protein	1.96e-52	259	39.382	G5EEE5
dd_Smed_v6_1978_0_1	NA	AP3B2	AP-3 complex subunit beta-2	3734	1.69299	5.93599	1.51e-10	1.51737	5.93599	1.22e-08	3.23326	2.86269	1.12945	darkblue	Contig1223	0.724862	6.75926	0.00770657	NA	NA	NA	NA	NA	NA	Q13367	AP3B2	AP-3 complex subunit beta-2	0	670	62.687	Q9JME5	Ap3b2	AP-3 complex subunit beta-2	0	670	62.687	A5PMS9	ap1b1	AP complex subunit beta	9.02e-75	572	31.818	O77290	rb	AP-3 complex subunit beta	0	695	56.835	O62348
dd_Smed_v6_1981_0_1	NA	ATP6V0E2	V-type proton ATPase subunit e 2	1119	2.57987	6.60178	5.62e-12	2.26892	6.60178	1.42e-09	5.97885	4.81961	1.24052	darkblue	Contig4543	0.586264	7.08586	0.019954	NA	17,29,30	Cathepsin+ cell,Protonephridia,Intestine	4	NA	NA	Q8NHE4	ATP6V0E2	V-type proton ATPase subunit e 2	1.91e-20	73	53.425	Q91XE7	Atp6v0e2	V-type proton ATPase subunit e 2	3.55e-20	73	52.055	F1Q700	atp6v0e1	ATPase, H+-transporting, lysosomal V0 subunit e1	1.43e-18	73	53.425	Q9VZG7	VhaM9.7-c	GEO09363p1	1.73e-15	77	45.455	Q20591
dd_Smed_v6_1984_0_1	NA	NA	NA	603	3.43881	6.60001	3.06e-24	3.72979	6.60001	1.18e-27	10.8439	13.2672	0.817345	dodgerblue	Contig7449	-0.162375	6.84089	0.316773	NA	19,39	Intestine,Cathepsin+ cell	2,5	NA	NA	NA	NA	NA	NA	NA	NA	NA	NA	NA	NA	NA	NA	NA	NA	NA	NA	NA	NA	Q9W2M4	CG10527	Uncharacterized protein	5.28e-19	141	34.043	NA
dd_Smed_v6_199_0_1	NA	NA	NA	1390	3.17597	6.27548	3.14e-23	3.41526	6.27548	3.42e-26	9.03781	10.6683	0.847164	dodgerblue	Contig7013	-0.594958	8.73789	0.123809	NA	19,23	Intestine,Neural	5	NA	NA	NA	NA	NA	NA	NA	NA	NA	NA	NA	NA	NA	NA	NA	NA	NA	NA	NA	NA	NA	NA	NA	NA	NA	NA	NA
dd_Smed_v6_1990_0_1	NA	CHN2	Beta-chimaerin	2171	1.84329	6.16205	2.53e-06	1.81345	6.16205	4.32e-06	3.58826	3.51482	1.0209	darkblue	PL05012B1A10	1.62312	7.97171	0.00213005	NA	17,28,31,39,41	Cathepsin+ cell	4	aqp+ parenchymal cells	NA	P52757	CHN2	Beta-chimaerin	5.26e-65	345	36.522	Q80XD1	Chn2	Beta-chimaerin	2.17e-63	290	39.31	E7F3K5	chn2	Chimerin 2	7.83e-66	285	39.298	Q9W4A9	RhoGAP5A	Rho GTPase activating protein at 5A, isoform A	7.57e-54	271	35.055	Q965N4
dd_Smed_v6_1999_0_1	NA	MEX3D	RNA-binding protein MEX3D	4436	1.20762	6.07759	4.1e-05	1.12125	6.07759	0.000173526	2.30956	2.17535	1.06169	darkblue	PL06004B1A07	-0.717627	6.84267	0.00489951	NA	1,2,3,4,7,18,26	Neural,Epidermal,Cathepsin+ cell,Muscle,Protonephridia	1	early epidermal progenitors,epidermis DVb	Early_epithelial_progeny	Q86XN8	MEX3D	RNA-binding protein MEX3D	3.52e-14	175	32.571	Q3UE17	Mex3d	RNA-binding protein MEX3D	3.45e-14	186	31.72	A2RRV6	mex3b	Mex-3 RNA-binding family member B	1.78e-13	184	33.152	Q9V4F3	Dmel\CG11360	LD09246p1	6.5e-13	202	30.198	Q95R07
dd_Smed_v6_20_0_1	hpgds	HPGDS	Hematopoietic prostaglandin D synthase	854	4.67758	12.0825	4.22e-35	4.65689	12.0825	7.67e-35	25.5912	25.2268	1.01444	darkblue	Contig217	4.02858	14.0476	2.34e-05	uniform	6,10,28,30,31,42	Intestine,Cathepsin+ cell	4,7	pgrn+ parenchymal cells,phagocytes,pigment,ldlrr-1+ parenchymal cells,glia,goblet cells	NA	O60760	HPGDS	Hematopoietic prostaglandin D synthase	6.94e-31	204	31.373	Q9JHF7	Hpgds	Hematopoietic prostaglandin D synthase	3.54e-30	201	32.338	F1Q814	gsta3	Uncharacterized protein	1.03e-14	182	27.473	P41043	GstS1	Glutathione S-transferase S1	6.73e-25	201	30.348	O16116
dd_Smed_v6_2001_0_1	NA	UBB	Epididymis secretory protein Li 50	708	1.33489	6.34067	4.48e-06	1.29619	6.34067	9.95e-06	2.52256	2.45579	1.02719	darkblue	Contig747	1.33039	8.83964	0.000119324	NA	26	Protonephridia	NA	NA	NA	Q5U5U6	UBB	Epididymis secretory protein Li 50	1.18e-21	152	34.211	P0CG49	Ubb	Polyubiquitin-B	4.95e-21	161	32.298	Q6TLG3	ubb	Ubiquitin C	2.09e-21	152	34.211	Q8MT02	Ubi-p5E	GH17513p	4.36e-21	161	32.298	P49632
dd_Smed_v6_20012_0_1	NA	DAD1	Dolichyl-diphosphooligosaccharide--protein glycosyltransferase subunit DAD1	454	2.64516	1.40495	0.00596318	2.10971	1.40495	0.0343812	6.25565	4.31605	1.44939	darkblue	NA	NA	NA	NA	NA	NA	NA	NA	NA	NA	P61803	DAD1	Dolichyl-diphosphooligosaccharide--protein glycosyltransferase subunit DAD1	3.87e-18	75	52	P61804	Dad1	Dolichyl-diphosphooligosaccharide--protein glycosyltransferase subunit DAD1	4.26e-18	75	52	A7E2L0	dad1	Dolichyl-diphosphooligosaccharide--protein glycosyltransferase subunit DAD1	1.26e-19	74	55.405	Q9VLM5	l(2)k12914	Dolichyl-diphosphooligosaccharide--protein glycosyltransferase subunit DAD1	6.35e-15	70	50	P52872
dd_Smed_v6_2002_0_1	NA	CPOX	Oxygen-dependent coproporphyrinogen-III oxidase, mitochondrial	1548	1.85227	6.30407	4.24e-12	1.93039	6.30407	6.09e-13	3.61068	3.81157	0.947295	dodgerblue	Contig4232	0.123369	7.97882	0.431941	NA	4,26	Cathepsin+ cell,Protonephridia	7	NA	NA	P36551	CPOX	Oxygen-dependent coproporphyrinogen-III oxidase, mitochondrial	1.08e-133	333	54.354	P36552	Cpox	Oxygen-dependent coproporphyrinogen-III oxidase, mitochondrial	1.52e-133	333	54.054	Q05AK3	cpox	Coproporphyrinogen oxidase	2.15e-125	310	52.903	Q9V3D2	Coprox	Oxygen-dependent coproporphyrinogen-III oxidase	3.56e-140	329	56.535	NA
dd_Smed_v6_2006_0_1	NA	IST1	IST1 homolog	1386	1.87593	7.26393	7.77e-10	1.75936	7.26393	9.71e-09	3.67038	3.38549	1.08415	darkblue	Contig5569	1.8998	9.89255	5.56e-05	NA	17,30	Cathepsin+ cell,Intestine	4	NA	NA	P53990	IST1	IST1 homolog	1.56e-77	364	43.681	Q9CX00	Ist1	IST1 homolog	4.8e-78	359	42.897	E9QCI8	ist1	Increased sodium tolerance 1 homolog (yeast)	9.83e-75	170	63.529	M9PBS9	Dmel\CG10103	Uncharacterized protein, isoform F	1.1e-67	175	59.429	NA
dd_Smed_v6_2009_0_1	NA	ACSL5	Long-chain-fatty-acid--CoA ligase 5	2817	4.66776	6.11598	2.04e-48	4.32502	6.11598	6.77e-43	25.4177	20.0429	1.26817	darkblue	Contig316	-0.0943712	7.81804	0.578818	NA	10,30	Cathepsin+ cell,Intestine	4,7	NA	NA	Q9ULC5	ACSL5	Long-chain-fatty-acid--CoA ligase 5	1e-150	553	44.304	Q8JZR0	Acsl5	Long-chain-fatty-acid--CoA ligase 5	5.18e-156	550	44.727	F1QDA6	acsl1b	Acyl-CoA synthetase long-chain family member 1b	1.88e-138	570	40	E2QCY2	Dmel\CG3961	CG3961, isoform D	4.02e-152	570	40.526	Q20121
dd_Smed_v6_2010_0_1	NA	NA	NA	747	2.63987	6.35939	9.07e-20	2.3802	6.35939	1.87e-16	6.23276	5.20608	1.19721	darkblue	Contig7646	1.88413	8.1739	0.00100788	NA	NA	NA	NA	NA	NA	NA	NA	NA	NA	NA	NA	NA	NA	NA	NA	NA	NA	NA	NA	NA	NA	NA	NA	NA	NA	NA	NA	NA	NA	NA
dd_Smed_v6_2011_0_1	NA	EPHX3	Epoxide hydrolase 3	1309	2.67617	6.33986	9.92e-22	2.71069	6.33986	3.6e-22	6.39156	6.54636	0.976353	dodgerblue	Contig6004	1.22927	8.12105	0.00403494	NA	6,10,15,17,28,30,31	Intestine,Cathepsin+ cell	7	NA	NA	Q9H6B9	EPHX3	Epoxide hydrolase 3	7.61e-60	296	35.135	Q6IE26	Ephx4	Epoxide hydrolase 4	5.18e-71	327	37.92	Q5PRC6	ephx2	Ephx2 protein	5.96e-27	324	26.543	Q9VGJ4	CG14717	CG14717 protein	4.57e-07	276	22.101	G5EBI4
dd_Smed_v6_2012_0_1	NA	COMMD10	COMM domain-containing protein 10	805	1.13134	6.37521	0.000771942	1.02151	6.37521	0.00305013	2.19063	2.03004	1.0791	darkblue	Contig343	1.48677	8.60292	0.000220749	NA	NA	NA	NA	NA	NA	Q9Y6G5	COMMD10	COMM domain-containing protein 10	4.38e-24	185	31.892	Q8JZY2	Commd10	COMM domain-containing protein 10	1.9e-22	185	30.27	Q567Z9	commd10	Zgc:110609	1.96e-23	182	29.67	NA	NA	NA	NA	NA	NA	NA
dd_Smed_v6_20154_0_1	NA	DDHD1	Phospholipase DDHD1	399	5.14784	0.907548	1.35e-05	4.37164	0.907548	0.000189475	35.4531	20.7011	1.71262	green	NA	NA	NA	NA	NA	NA	NA	NA	NA	NA	Q8NEL9	DDHD1	Phospholipase DDHD1	3.82e-05	44	38.636	Q80YA3	Ddhd1	Phospholipase DDHD1	2.17e-05	44	38.636	E7F9W6	ddhd1a	DDHD domain-containing 1a	1.7e-06	44	40.909	NA	NA	NA	NA	NA	NA	Q8WQE0
dd_Smed_v6_2021_0_1	pi16	PI16	Peptidase inhibitor 16	1932	7.78784	5.82134	1.34e-74	6.47356	5.82134	2.27e-57	220.991	88.8661	2.48679	darkgreen	PL06010B1C01	-0.378308	6.4884	0.176653	goblet	NA	NA	8	NA	NA	Q6UXB8	PI16	Peptidase inhibitor 16	8.9e-21	190	32.105	A2A5I3	R3hdml	Peptidase inhibitor R3HDML	1.06e-20	207	29.469	Q7SY04	crispld1b	Cysteine-rich secretory protein LCCL domain containing 1	1.4e-15	181	29.834	Q9VFY2	CG8483	CG8483	5.56e-07	201	26.368	Q8MQ33
dd_Smed_v6_2022_0_1	NA	LPCAT1	Lysophosphatidylcholine acyltransferase 1	1813	1.26873	5.34529	5.51e-06	1.23362	5.34529	1.17e-05	2.4095	2.35156	1.02464	darkblue	Contig4628	1.1019	8.9037	0.000147795	NA	15,17,29	Cathepsin+ cell,Protonephridia	NA	NA	NA	Q8NF37	LPCAT1	Lysophosphatidylcholine acyltransferase 1	2.05e-97	424	37.736	Q3TFD2	Lpcat1	Lysophosphatidylcholine acyltransferase 1	4.34e-99	485	37.113	Q1LWG4	lpcat1	Lysophosphatidylcholine acyltransferase 1	1.23e-100	424	40.566	Q0KHU5	LPCAT	Lysophosphatidylcholine acyltransferase	3.66e-99	393	42.239	Q9N5S9
dd_Smed_v6_2024_0_1	NA	IFI30	Gamma-interferon-inducible lysosomal thiol reductase	1030	2.72292	5.6127	5.76e-13	2.20894	5.6127	4.68e-09	6.60206	4.62337	1.42798	darkblue	Contig1410	-0.404609	7.59734	0.0513171	NA	4,10,17,28,31,41	Cathepsin+ cell	8	pigment,goblet cells	NA	P13284	IFI30	Gamma-interferon-inducible lysosomal thiol reductase	3.86e-23	174	31.609	Q9ESY9	Ifi30	Gamma-interferon-inducible lysosomal thiol reductase	8.37e-20	149	29.53	Q5XJN2	ifi30	Gamma-interferon-inducible lysosomal thiol reductase	2.26e-31	181	35.912	Q95RA9	GILT1	GILT-like protein 1	6.56e-20	197	29.949	O17861
dd_Smed_v6_2028_0_1	NA	MAST4	Microtubule-associated serine/threonine-protein kinase 4	3138	1.36603	4.98545	0.000253951	1.17021	4.98545	0.00228646	2.5776	2.25044	1.14538	darkblue	NA	NA	NA	NA	NA	8	Neural	NA	NA	NA	O15021	MAST4	Microtubule-associated serine/threonine-protein kinase 4	0	556	56.295	Q811L6	Mast4	Microtubule-associated serine/threonine-protein kinase 4	0	556	56.475	E7F723	mast2	Microtubule-associated serine/threonine kinase 2	0	556	55.216	Q9VUQ9	dop	Drop out, isoform A	1.3e-144	326	63.804	H9G328
dd_Smed_v6_2030_0_1	NA	MAP3K3	Mitogen-activated protein kinase kinase kinase 3	4245	1.5591	5.30722	2.02e-06	1.64731	5.30722	5.72e-07	2.94669	3.13249	0.940688	dodgerblue	NA	NA	NA	NA	NA	10,15,17,24,27,28,30,34,39,41	Cathepsin+ cell,Epidermal,Pharynx,Intestine,Neural	4,7	NA	NA	Q99759	MAP3K3	Mitogen-activated protein kinase kinase kinase 3	1.53e-40	265	36.981	Q61084	Map3k3	Mitogen-activated protein kinase kinase kinase 3	3.66e-40	265	36.981	E7EXX1	map3k3	Mitogen-activated protein kinase kinase kinase 3	1.45e-41	267	37.079	Q7KV88	msn	Mitogen-activated protein kinase kinase kinase kinase	4.35e-38	260	37.308	H2L099
dd_Smed_v6_2031_0_1	svep1	NOTCH3	Neurogenic locus notch homolog protein 3	1403	1.96492	5.59227	6.25e-12	1.87739	5.59227	6.03e-11	3.9039	3.67409	1.06255	darkblue	Contig6326	1.6639	8.21781	0.00185386	uniform	10,17,28,30,39,40	Cathepsin+ cell,Intestine,Protonephridia	NA	NA	NA	Q9UM47	NOTCH3	Neurogenic locus notch homolog protein 3	2.11e-16	123	33.333	A2AVA0	Svep1	Sushi, von Willebrand factor type A, EGF and pentraxin domain-containing protein 1	5.14e-17	127	32.283	Q800E4	notch3	Notch3	2.85e-15	123	34.146	P07207	N	Neurogenic locus Notch protein	1.64e-14	125	38.4	P14585
dd_Smed_v6_2032_0_1	NA	EPB41L2	EPB41L2 protein	3632	1.20794	7.69242	4.36e-05	1.00079	7.69242	0.000971373	2.31008	2.00109	1.15441	darkblue	Contig7446	0.661844	6.56144	0.0473828	NA	2,3,6,11,19,24,25,27,29,30,35,37,40	Epidermal,Intestine,Pharynx,Protonephridia	7	early epidermal progenitors,late epidermal progenitors 2,late epidermal progenitors 1,epidermis DVb,epidermis,pharynx cell type,protonephridia,phagocytes	Early_epithelial_progeny	I6L9B1	EPB41L2	EPB41L2 protein	2.23e-74	388	38.66	Q9WV92	Epb41l3	Band 4.1-like protein 3	1.61e-71	352	42.898	E7F9M7	si:ch73-18b11.1	Si:ch73-18b11.1	2.24e-71	343	40.816	Q9V8R9	cora	Protein 4.1 homolog	2.36e-64	304	42.105	G5EFD6
dd_Smed_v6_20353_0_1	NA	SLC32A1	Vesicular inhibitory amino acid transporter	1577	6.29428	2.25472	2.95e-11	6.96802	2.25472	5.72e-13	78.4814	125.194	0.626877	orange	PL06018A1E03	0.177794	6.07184	0.463827	NA	NA	NA	NA	NA	NA	Q9H598	SLC32A1	Vesicular inhibitory amino acid transporter	3.64e-41	406	30.296	O35633	Slc32a1	Vesicular inhibitory amino acid transporter	1.47e-41	429	29.371	A1L1T3	slc32a1	Solute carrier family 32 (GABA vesicular transporter), member 1	3.57e-43	420	30.476	A1Z9M6	VGAT	Vesicular GABA transporter	6.6e-39	405	27.16	P34579
dd_Smed_v6_2037_0_1	NA	DPYD	Dihydropyrimidine dehydrogenase [NADP(+)]	3313	3.48007	7.09782	1.94e-29	3.58985	7.09782	6.15e-31	11.1585	12.0408	0.926726	dodgerblue	NA	NA	NA	NA	NA	6,10,19,30	Intestine,Cathepsin+ cell	5,7	NA	NA	Q12882	DPYD	Dihydropyrimidine dehydrogenase [NADP(+)]	0	1020	62.647	Q8CHR6	Dpyd	Dihydropyrimidine dehydrogenase [NADP(+)]	0	1018	61.886	Q6NYG8	dpyd	Dihydropyrimidine dehydrogenase [NADP(+)]	0	1023	60.704	Q9W374	su(r)	Dihydropyrimidine dehydrogenase [NADP(+)]	0	1023	57.771	Q18164
dd_Smed_v6_2041_0_1	NA	NA	NA	409	1.59417	4.11375	0.00571718	1.61561	4.11375	0.00570157	3.0192	3.0644	0.985248	dodgerblue	NA	NA	NA	NA	NA	NA	NA	NA	NA	NA	NA	NA	NA	NA	NA	NA	NA	NA	NA	NA	NA	NA	NA	NA	NA	NA	NA	NA	NA	NA	NA	NA	NA	NA	NA
dd_Smed_v6_2042_0_1	NA	NA	NA	599	1.45288	5.87694	1.32e-06	1.53452	5.87694	3.58e-07	2.73755	2.89693	0.944983	dodgerblue	Contig6660	2.04783	8.73103	0.000948001	NA	4,10,15,17,28,30,39,41,42	Cathepsin+ cell,Intestine	4	NA	NA	NA	NA	NA	NA	NA	NA	NA	NA	NA	NA	NA	NA	NA	NA	NA	NA	NA	NA	NA	NA	NA	NA	NA	NA	NA
dd_Smed_v6_2044_0_1	NA	TPRG1L	Tumor protein p63-regulated gene 1-like protein	985	1.63694	7.03431	2.14e-09	1.42714	7.03431	2.4e-07	3.11005	2.68912	1.15653	darkblue	Contig1	1.28325	9.58847	0.000102681	NA	9,20,21	Neural	NA	NA	NA	Q5T0D9	TPRG1L	Tumor protein p63-regulated gene 1-like protein	1.55e-17	195	29.744	Q9DBS2	Tprg1l	Tumor protein p63-regulated gene 1-like protein	3.73e-18	209	29.187	F1R5K8	tprg1	Tumor protein p63-regulated 1	2.42e-17	189	28.042	NA	NA	NA	NA	NA	NA	NA
dd_Smed_v6_20482_0_1	NA	-	Heat shock 70kDa protein 8 isoform 2 variant	453	3.99901	2.64891	5.9e-07	3.26803	2.64891	3.86e-05	15.989	9.6333	1.65977	green	Contig4015	0.208125	5.76122	0.215009	NA	NA	NA	NA	NA	NA	Q53HF2	-	Heat shock 70kDa protein 8 isoform 2 variant	3.46e-90	151	84.768	P63017	Hspa8	Heat shock cognate 71 kDa protein	1.29e-88	151	84.768	O42360	hsp70.3	Heat shock cognate 70 kDa protein	1.84e-88	151	80.795	P11147	Hsc70-4	Heat shock 70 kDa protein cognate 4	3.5e-86	151	82.119	P09446
dd_Smed_v6_2053_0_1	NA	SLC35F6	Solute carrier family 35 member F6	1414	1.96558	4.44531	7.87e-08	2.19782	4.44531	2.16e-09	3.9057	4.58786	0.851313	dodgerblue	NA	NA	NA	NA	NA	17,30	Cathepsin+ cell,Intestine	4	NA	NA	Q8N357	SLC35F6	Solute carrier family 35 member F6	3.87e-57	390	34.615	Q8VE96	Slc35f6	Solute carrier family 35 member F6	3.18e-49	351	35.043	Q5SNR2	slc35f6	Solute carrier family 35, member F6	9.59e-53	395	33.924	Q9VGF5	Tango9	LP09696p	5.28e-23	360	26.389	NA
dd_Smed_v6_2058_0_1	NA	RIPOR1	Rho family-interacting cell polarization regulator 1	1644	1.45062	5.28963	2.14e-05	1.45654	5.28963	2.27e-05	2.73325	2.74449	0.995903	dodgerblue	NA	NA	NA	NA	NA	10,11,17,27,28,29,30,37	Cathepsin+ cell,Epidermal,Pharynx,Protonephridia,Intestine	4	NA	NA	Q6ZS17	RIPOR1	Rho family-interacting cell polarization regulator 1	1.57e-09	138	26.812	Q80U16	Ripor2	Rho family-interacting cell polarization regulator 2	3.96e-09	135	26.667	Q1LXK2	fam65a	Family with sequence similarity 65, member A	4.6e-10	186	24.731	NA	NA	NA	NA	NA	NA	NA
dd_Smed_v6_2061_0_1	NA	NA	NA	682	3.85221	6.86321	1.37e-31	3.79706	6.86321	8.03e-31	14.4421	13.9005	1.03896	darkblue	Contig776	2.09441	8.38225	7.79e-05	NA	6,28,30	Intestine,Cathepsin+ cell	4,7	NA	NA	NA	NA	NA	NA	NA	NA	NA	NA	NA	NA	NA	NA	NA	NA	NA	NA	NA	NA	Q8SZ28	CG3884	RE21371p	2.26e-22	117	41.026	NA
dd_Smed_v6_20619_0_1	NA	SETMAR	Histone-lysine N-methyltransferase SETMAR	736	6.40419	0.62915	1.39e-06	6.4659	0.62915	1.33e-06	84.6944	88.3955	0.95813	dodgerblue	NA	NA	NA	NA	NA	NA	NA	7	NA	NA	Q53H47	SETMAR	Histone-lysine N-methyltransferase SETMAR	3.21e-12	199	29.648	NA	NA	NA	NA	NA	NA	NA	NA	NA	NA	NA	NA	NA	NA	NA	NA	NA	NA	NA
dd_Smed_v6_2062_0_1	NA	CMBL	Carboxymethylenebutenolidase homolog	923	1.12692	6.14465	0.00190768	1.23682	6.14465	0.000680053	2.18391	2.35679	0.926648	dodgerblue	Contig5852	-0.468169	8.88913	0.0318043	NA	0,4,5,6,10,19,22,31	Neoblast,Cathepsin+ cell,Intestine	NA	NA	NA	Q96DG6	CMBL	Carboxymethylenebutenolidase homolog	2.56e-16	234	25.641	Q8R1G2	Cmbl	Carboxymethylenebutenolidase homolog	2.73e-17	236	26.695	A7MBU9	cmbl	Carboxymethylenebutenolidase homolog (Pseudomonas)	7.44e-23	234	30.769	NA	NA	NA	NA	NA	NA	NA
dd_Smed_v6_2066_0_1	NA	LMAN2	Vesicular integral-membrane protein VIP36	1157	0.97658	5.23969	0.00610516	1.04542	5.23969	0.00349574	1.96779	2.06396	0.953405	dodgerblue	Contig2588	0.202749	7.99	0.374879	NA	4,17	Cathepsin+ cell	NA	NA	NA	Q12907	LMAN2	Vesicular integral-membrane protein VIP36	2.46e-88	272	48.529	Q9DBH5	Lman2	Vesicular integral-membrane protein VIP36	3.46e-87	261	49.425	Q8JHI2	lman2la	Vesicular integral-membrane protein VIP36-like protein	1.08e-76	274	44.526	Q9VCC2	CG5510	CG5510	2.1e-97	260	51.923	NA
dd_Smed_v6_2069_0_1	NA	NA	NA	786	1.09953	5.87145	4.46e-05	0.875463	5.87145	0.00165664	2.14285	1.8346	1.16802	darkblue	Contig542	0.329332	8.2322	0.0798333	NA	NA	NA	NA	NA	NA	NA	NA	NA	NA	NA	NA	NA	NA	NA	NA	NA	NA	NA	NA	NA	NA	NA	NA	NA	NA	NA	NA	NA	NA	NA
dd_Smed_v6_20716_0_1	NA	NA	NA	1026	4.19182	4.70847	2.36e-27	4.15413	4.70847	6.28e-27	18.2753	17.804	1.02647	darkblue	NA	NA	NA	NA	NA	NA	NA	NA	NA	NA	NA	NA	NA	NA	NA	NA	NA	NA	NA	NA	NA	NA	NA	NA	NA	NA	NA	NA	NA	NA	NA	NA	NA	NA	NA
dd_Smed_v6_2075_0_1	NA	PANK1	Pantothenate kinase 1	1318	2.57659	7.20409	5.67e-19	2.78592	7.20409	1.16e-21	5.96527	6.89675	0.864939	dodgerblue	Contig5043	1.91154	9.07549	8.63e-05	NA	10,19,30	Cathepsin+ cell,Intestine	4,7	NA	NA	Q8TE04	PANK1	Pantothenate kinase 1	1.08e-09	190	25.789	Q8R2W9	Pank3	Pantothenate kinase 3	3.09e-12	193	24.352	F1QB40	pank1a	Pantothenate kinase 1a	6.24e-12	186	26.344	D8FT20	fbl	Fumble, isoform F	1.65e-11	271	22.878	NA
dd_Smed_v6_2076_0_1	NA	PGRMC2	Membrane-associated progesterone receptor component 2	1729	1.11914	5.79456	0.000250567	1.05481	5.79456	0.000683259	2.17217	2.07745	1.0456	darkblue	Contig3231	0.623873	6.94807	0.0249652	NA	6,11,31	Intestine,Epidermal,Cathepsin+ cell	0,7	NA	NA	O15173	PGRMC2	Membrane-associated progesterone receptor component 2	4.93e-34	160	44.375	Q80UU9	Pgrmc2	Membrane-associated progesterone receptor component 2	1.39e-33	160	45	Q5U3G0	pgrmc1	Progesterone receptor membrane component 1	1.98e-33	161	50.311	Q9VXM4	MSBP	LD12946p	1.91e-35	179	44.693	Q7YZW5
dd_Smed_v6_2083_0_1	NA	CYP2A13	Cytochrome P450 2A13	2175	3.05544	5.36453	1.3e-13	3.26074	5.36453	4.4e-15	8.31343	9.58478	0.867357	dodgerblue	Contig4575	0.879353	7.77391	0.000644189	NA	6,10,19,30,31	Intestine,Cathepsin+ cell	5,7	NA	Gut	Q16696	CYP2A13	Cytochrome P450 2A13	4.53e-73	441	34.921	O54750	Cyp2j6	Cytochrome P450 2J6	9.32e-75	470	33.191	F1QP46	cyp2k21	Cytochrome P450, family 2, subfamily k, polypeptide 21	1.75e-72	452	34.735	Q95078	Cyp18a1	Cytochrome P450 18a1	6.35e-61	446	30.493	O16482
dd_Smed_v6_2084_0_1	NA	BEST2	Bestrophin-2	1916	2.11483	5.68053	6.53e-15	2.20752	5.68053	4.99e-16	4.33138	4.6188	0.937771	dodgerblue	Contig1597	1.99506	8.0676	0.00012255	NA	10,28,30,42	Cathepsin+ cell,Intestine	4	NA	NA	Q8NFU1	BEST2	Bestrophin-2	4.77e-44	358	31.006	Q8BGM5	Best2	Bestrophin-2	1.6e-44	358	31.844	NA	NA	NA	NA	NA	NA	Q9V3J6	Best1	Bestrophin homolog	1.57e-50	365	32.055	Q17529
dd_Smed_v6_2085_0_1	NA	TECR	Very-long-chain enoyl-CoA reductase	1102	1.21807	5.49481	3.86e-05	1.08535	5.49481	0.000316919	2.32636	2.1219	1.09636	darkblue	Contig4808	-0.76363	9.46774	0.000893328	NA	3,6	Epidermal,Intestine	0,7	NA	NA	Q9NZ01	TECR	Very-long-chain enoyl-CoA reductase	9.7e-103	307	52.117	Q9CY27	Tecr	Very-long-chain enoyl-CoA reductase	3.5e-102	307	51.466	Q7T390	tecrb	Glycoprotein, synaptic 2	5.22e-101	307	50.489	Q9VZL3	Sc2	Sc2	6.21e-89	305	48.197	Q9N5Y2
dd_Smed_v6_2087_0_1	NA	PISD	Phosphatidylserine decarboxylase proenzyme, mitochondrial	1863	2.61506	6.91392	1.54e-14	2.65246	6.91392	7.95e-15	6.1265	6.28738	0.974413	dodgerblue	PL04006B1F08	0.890258	7.74739	0.00239393	NA	30	Intestine	4	NA	NA	Q9UG56	PISD	Phosphatidylserine decarboxylase proenzyme, mitochondrial	5.84e-68	314	39.172	Q8BSF4	Pisd	Phosphatidylserine decarboxylase proenzyme, mitochondrial	2.91e-68	321	39.564	NA	NA	NA	NA	NA	NA	NA	NA	NA	NA	NA	NA	NA
dd_Smed_v6_2095_0_1	NA	ENTPD4	Ectonucleoside triphosphate diphosphohydrolase 4	1116	1.31051	4.9968	0.000959526	1.36353	4.9968	0.000652774	2.4803	2.57314	0.963919	dodgerblue	NA	NA	NA	NA	NA	NA	NA	NA	NA	NA	Q9Y227	ENTPD4	Ectonucleoside triphosphate diphosphohydrolase 4	1.94e-36	169	38.462	Q9DBT4	Entpd4	Ectonucleoside triphosphate diphosphohydrolase 4	2.01e-36	169	39.053	Q6DC46	entpd1	Ectonucleoside triphosphate diphosphohydrolase 1	1.68e-08	262	20.611	NA	NA	NA	NA	NA	NA	Q21815
dd_Smed_v6_2096_0_1	NA	RDH13	Retinol dehydrogenase 13	1280	2.24789	5.70108	2.65e-15	2.13031	5.70108	7.13e-14	4.74987	4.3781	1.08491	darkblue	Contig5365	1.49602	9.394	7.19e-05	NA	17,24,29,30	Cathepsin+ cell,Epidermal,Protonephridia,Intestine	4	NA	NA	Q8NBN7	RDH13	Retinol dehydrogenase 13	1.51e-67	313	43.45	Q8BYK4	Rdh12	Retinol dehydrogenase 12	2.9e-67	297	44.781	Q502C0	zgc:112332	Zgc:112332	7.07e-72	279	48.029	A1Z729	CG2064	CG2064	3.59e-80	302	47.682	Q9UAW2
dd_Smed_v6_2097_0_1	NA	NA	NA	601	2.9012	4.16994	1.14e-15	2.92266	4.16994	8.13e-16	7.47049	7.58242	0.985238	dodgerblue	Contig7349	2.11986	7.72837	0.00229584	NA	10,13,29,30	Cathepsin+ cell,Muscle,Protonephridia,Intestine	4	NA	NA	NA	NA	NA	NA	NA	NA	NA	NA	NA	NA	NA	NA	NA	NA	NA	NA	NA	NA	NA	NA	NA	NA	NA	NA	NA
dd_Smed_v6_2098_0_1	NA	CISD2	CDGSH iron-sulfur domain-containing protein 2	506	1.40909	5.12402	0.00167487	1.70126	5.12402	0.000140479	2.65569	3.25184	0.816673	dodgerblue	Contig7040	0.108549	9.48164	0.680515	NA	13,16,25	Muscle,Pharynx	NA	NA	Muscle	Q8N5K1	CISD2	CDGSH iron-sulfur domain-containing protein 2	2.68e-32	135	44.444	Q9CQB5	Cisd2	CDGSH iron-sulfur domain-containing protein 2	3.99e-33	136	46.324	Q58EB0	zgc:110843	Zgc:110843	1.17e-29	95	52.632	Q9VAM6	Cisd2	CDGSH iron-sulfur domain-containing protein 2 homolog	7.47e-29	130	39.231	NA
dd_Smed_v6_2099_0_1	NA	RAB4A	Ras-related protein Rab-4A	1033	1.38109	5.81825	6.24e-07	1.25123	5.81825	8.12e-06	2.60465	2.38045	1.09418	darkblue	Contig942	0.8304	8.69624	0.00106692	NA	8,21	Neural	NA	NA	NA	P20338	RAB4A	Ras-related protein Rab-4A	6.02e-82	227	55.507	P56371	Rab4a	Ras-related protein Rab-4A	2.08e-81	181	62.431	Q6PHI9	rab4a	Ras-related protein Rab-4A	2.62e-81	227	55.507	Q7KY04	Rab4	Rab4 protein	1.82e-80	181	60.221	Q93874
dd_Smed_v6_2104_0_1	NA	BIRC2	Baculoviral IAP repeat-containing protein 2	809	2.17291	7.26344	7.78e-16	2.03526	7.26344	4.74e-14	4.50932	4.09896	1.10011	darkblue	Contig778	2.13638	8.64889	9.61e-05	NA	11,24,27,30,31,37	Epidermal,Pharynx,Intestine,Cathepsin+ cell	4	late epidermal progenitors 2,epidermis,pharynx cell type,phagocytes,pigment	Gut	Q13490	BIRC2	Baculoviral IAP repeat-containing protein 2	0.000157	29	51.724	Q62210	Birc2	Baculoviral IAP repeat-containing protein 2	0.00035	29	48.276	Q804S5	mib1	E3 ubiquitin-protein ligase mib1	0.000626	53	33.962	Q24307	Diap2	Death-associated inhibitor of apoptosis 2	0.0001	51	35.294	NA
dd_Smed_v6_2106_0_1	NA	MAP2K6	Dual specificity mitogen-activated protein kinase kinase 6	1567	1.85814	4.7223	0.000102874	1.60602	4.7223	0.000996512	3.6254	3.04412	1.19095	darkblue	Contig1542	1.60991	9.40573	4.53e-05	NA	10,15,17,24,28,41	Cathepsin+ cell,Epidermal	4	NA	Cathepsin+ b	P52564	MAP2K6	Dual specificity mitogen-activated protein kinase kinase 6	1.51e-88	313	45.048	P70236	Map2k6	Dual specificity mitogen-activated protein kinase kinase 6	7.62e-88	313	44.728	Q9DGE0	map2k6	Dual specificity mitogen-activated protein kinase kinase 6	1.02e-86	315	44.444	O62602	lic	Licorne	6.1e-81	313	41.853	G5EDF7
dd_Smed_v6_2112_0_1	NA	USP4	Ubiquitin specific peptidase 4 (Proto-oncogene), isoform CRA_b	2835	2.18262	5.20775	6.17e-12	2.08931	5.20775	5.37e-11	4.53978	4.25546	1.06681	darkblue	Contig937	1.73726	8.83796	4.43e-05	NA	NA	NA	NA	NA	NA	A0A024R2X6	USP4	Ubiquitin specific peptidase 4 (Proto-oncogene), isoform CRA_b	7.73e-145	864	33.912	P35123	Usp4	Ubiquitin carboxyl-terminal hydrolase 4	6.64e-145	907	32.966	F1QPF4	usp11	Ubiquitin-specific peptidase 11	1.59e-101	554	35.379	Q9W117	Usp15-31	FI05488p	5.27e-51	678	24.779	Q9GRV2
dd_Smed_v6_2115_0_1	NA	AGPS	Alkyldihydroxyacetonephosphate synthase, peroxisomal	2055	1.61027	5.68702	6.23e-10	1.34518	5.68702	3.33e-07	3.05309	2.54062	1.20171	darkblue	Contig5231	-0.00234645	7.49965	0.730123	NA	28	Cathepsin+ cell	7	NA	NA	O00116	AGPS	Alkyldihydroxyacetonephosphate synthase, peroxisomal	0	588	56.122	Q8C0I1	Agps	Alkyldihydroxyacetonephosphate synthase, peroxisomal	0	588	56.293	A1L258	d2hgdh	D-2-hydroxyglutarate dehydrogenase, mitochondrial	1.11e-08	162	24.074	Q9V778	ADPS	Alkyldihydroxyacetonephosphate synthase	0	588	52.891	O45218
dd_Smed_v6_212_0_1	NA	NA	NA	1940	3.16549	7.02166	6.26e-27	2.9744	7.02166	3.42e-24	8.97236	7.85932	1.14162	darkblue	Contig1080	2.94842	11.8516	2.53e-05	NA	10,15,17,19,24,28,29,30,37,39,40,41	Cathepsin+ cell,Intestine,Epidermal,Protonephridia,Pharynx	4	phagocytes	NA	NA	NA	NA	NA	NA	NA	NA	NA	NA	NA	NA	NA	NA	NA	NA	NA	NA	NA	NA	NA	NA	NA	NA	NA	NA
dd_Smed_v6_21242_0_1	NA	NA	NA	672	4.45405	0.782698	0.0116767	6.41558	0.782698	0.000591544	21.9181	85.3657	0.256755	darkorange	NA	NA	NA	NA	NA	NA	NA	NA	NA	NA	NA	NA	NA	NA	NA	NA	NA	NA	NA	NA	NA	NA	NA	NA	NA	NA	NA	NA	NA	NA	NA	NA	NA	NA	NA
dd_Smed_v6_2127_0_1	NA	MPC1	Mitochondrial pyruvate carrier 1	922	1.08054	5.39744	0.00511754	1.22304	5.39744	0.00150452	2.11483	2.33438	0.905948	dodgerblue	NA	NA	NA	NA	NA	24	Epidermal	NA	NA	NA	Q9Y5U8	MPC1	Mitochondrial pyruvate carrier 1	3.6e-39	98	63.265	P63030	Mpc1	Mitochondrial pyruvate carrier 1	1.82e-40	99	63.636	F1Q6Z3	mpc1	Mitochondrial pyruvate carrier	2.25e-41	101	64.356	Q7KSC4	Mpc1	Mitochondrial pyruvate carrier 1	9.07e-36	103	56.311	Q21828
dd_Smed_v6_2129_0_1	NA	STAM2	Signal transducing adapter molecule 2	1918	1.37451	5.40711	1.58e-06	1.14333	5.40711	8.87e-05	2.59279	2.2089	1.17379	darkblue	Contig7489	0.830294	7.97303	0.00912569	NA	NA	NA	NA	NA	NA	O75886	STAM2	Signal transducing adapter molecule 2	1.38e-76	556	33.813	P70297	Stam	Signal transducing adapter molecule 1	2.24e-75	380	39.211	Q567F1	grap2a	GRB2-related adaptor protein 2a	2.06e-10	82	36.585	Q9XTL2	Stam	Jak pathway signal transduction adaptor molecule	2.75e-59	408	34.559	O01498
dd_Smed_v6_2131_0_1	NA	NA	NA	1640	2.10455	4.60618	1.07e-07	2.39595	4.60618	1.74e-09	4.30063	5.26322	0.817109	dodgerblue	Contig2529	2.41167	9.41011	0.000399959	NA	10,17,28,29,30	Cathepsin+ cell,Protonephridia,Intestine	4	NA	NA	NA	NA	NA	NA	NA	NA	P11438	Lamp1	Lysosome-associated membrane glycoprotein 1	8.98e-05	202	32.178	NA	NA	NA	NA	NA	NA	NA	NA	NA	NA	NA	NA	NA
dd_Smed_v6_2132_0_1	NA	NA	NA	935	1.33191	5.85832	9.08e-06	1.32523	5.85832	1.16e-05	2.51735	2.50573	1.00464	darkblue	Contig4683	0.738158	9.22713	0.00175577	NA	20,21,24,30,37,40	Neural,Epidermal,Intestine,Pharynx,Protonephridia	4	NA	NA	NA	NA	NA	NA	NA	NA	NA	NA	NA	NA	NA	NA	NA	NA	NA	NA	NA	NA	Q8SY89	kune	RH22958p	6.65e-22	227	30.396	NA
dd_Smed_v6_2134_0_1	NA	KDM1B	Lysine-specific histone demethylase 1B	1574	2.56331	6.54174	4.3e-21	2.29643	6.54174	2.45e-17	5.91061	4.91241	1.2032	darkblue	NA	NA	NA	NA	NA	10,30,31,42	Cathepsin+ cell,Intestine	4,7	NA	NA	Q8NB78	KDM1B	Lysine-specific histone demethylase 1B	3.12e-13	442	23.077	Q8CIG3	Kdm1b	Lysine-specific histone demethylase 1B	5.49e-14	446	24.215	F1Q7C3	zgc:66484	Zgc:66484	4.46e-18	474	23.207	NA	NA	NA	NA	NA	NA	Q21988
dd_Smed_v6_2137_0_1	NA	LAMTOR2	Ragulator complex protein LAMTOR2	601	1.8881	6.54812	2.33e-06	1.62281	6.54812	6.14e-05	3.70147	3.07974	1.20188	darkblue	Contig623	1.26328	9.22851	0.00149063	NA	NA	NA	3	NA	NA	Q9Y2Q5	LAMTOR2	Ragulator complex protein LAMTOR2	8.41e-23	120	37.5	Q9JHS3	Lamtor2	Ragulator complex protein LAMTOR2	7.96e-23	120	37.5	Q6DEG4	lamtor2	Ragulator complex protein LAMTOR2	1.19e-21	122	35.246	Q9V8I2	CG5189	Ragulator complex protein LAMTOR2 homolog	1.73e-18	121	32.231	Q9N2U6
dd_Smed_v6_2138_0_1	NA	BARD1	BRCA1 associated RING domain 1	616	3.01194	4.22414	6.18e-19	2.6624	4.22414	2.85e-15	8.06651	6.33085	1.27416	darkblue	Contig2203	0.915335	6.95603	0.0369583	NA	10,30	Cathepsin+ cell,Intestine	4	NA	NA	A0AVN2	BARD1	BRCA1 associated RING domain 1	9.43e-11	120	31.667	P81069	Gabpb2	GA-binding protein subunit beta-2	1.19e-09	86	31.395	Q502K3	ankrd52	Serine/threonine-protein phosphatase 6 regulatory ankyrin repeat subunit C	4.09e-11	87	36.782	Q7KIQ2	nompC	Mechanosensory transduction channel NOMPC	8.2e-10	87	29.885	Q93203
dd_Smed_v6_214_0_1	NA	RPS29	40S ribosomal protein S29	785	1.24798	8.21732	0.0218745	1.43012	8.21732	0.00879281	2.37509	2.69469	0.881394	dodgerblue	Contig7468	-1.17401	9.94645	0.00810385	NA	6,19,26	Intestine,Protonephridia	3	NA	Cluster 1	P62273	RPS29	40S ribosomal protein S29	2.31e-19	51	68.627	P62274	Rps29	40S ribosomal protein S29	2.55e-19	51	68.627	Q6Q419	rps29	Ribosomal protein S29	8.29e-20	51	70.588	Q9VH69	RpS29	40S ribosomal protein S29	4.86e-20	51	70.588	P90983
dd_Smed_v6_214_1_1	gm2a	GM2A	Ganglioside GM2 activator	640	7.58952	9.56679	1.63e-65	5.41573	9.56679	5.31e-41	192.608	42.6872	4.51208	darkgreen	Contig202	-0.973408	10.8071	0.00409371	goblet	NA	NA	8	NA	NA	P17900	GM2A	Ganglioside GM2 activator	4.74e-19	169	27.811	Q60648	Gm2a	Ganglioside GM2 activator	1.14e-18	177	27.684	A0A0R4IJ69	gm2a	GM2 ganglioside activator	4.56e-18	171	27.485	NA	NA	NA	NA	NA	NA	NA
dd_Smed_v6_215_0_1	psap	PSAP	Prosaposin	921	6.50815	9.49577	7.15e-49	6.61362	9.49577	6.35e-50	91.0221	97.9259	0.9295	dodgerblue	Contig3017	4.20168	11.3843	3.67e-05	uniform	30,39	Intestine,Cathepsin+ cell	4	phagocytes,aqp+ parenchymal cells	Gut	C9JIZ6	PSAP	Prosaposin	5.56e-08	175	20	NA	NA	NA	NA	NA	NA	E7FCT1	psap	Prosaposin	1.32e-08	200	22	Q9U9P3	Sap-r	Ecdysone dependent glycoprotein	6.96e-05	188	20.213	NA
dd_Smed_v6_2154_0_1	NA	ADSS	Adenylosuccinate synthetase isozyme 2	1462	1.65385	7.25916	3.2e-08	1.50923	7.25916	5.66e-07	3.14672	2.84658	1.10544	darkblue	Contig5573	0.0090781	7.42607	0.880988	NA	2,6,11	Epidermal,Intestine	0,7	late epidermal progenitors 2	Cluster 11	P30520	ADSS	Adenylosuccinate synthetase isozyme 2	2.17e-165	428	56.776	P46664	Adss	Adenylosuccinate synthetase isozyme 2	1.27e-165	428	57.009	Q568F6	adss	Adenylosuccinate synthetase isozyme 2	5.87e-168	428	57.009	Q9Y0Y2	AdSS	Adenylosuccinate synthetase	5.76e-165	423	55.556	P91134
dd_Smed_v6_2160_0_1	NA	DNM1	Dynamin-1	2683	1.00419	5.55161	0.00407446	0.956954	5.55161	0.00742563	2.00581	1.94121	1.03328	darkblue	NA	NA	NA	NA	NA	8,9,15,17,27,40	Neural,Cathepsin+ cell,Pharynx,Protonephridia	NA	NA	NA	Q05193	DNM1	Dynamin-1	0	781	64.405	P39053	Dnm1	Dynamin-1	0	781	64.277	Q6P122	dnm2b	Dynamin2-like	0	823	61.482	P27619	shi	Dynamin	0	770	61.169	Q9U9I9
dd_Smed_v6_2161_0_1	NA	GBE1	1,4-alpha-glucan-branching enzyme	2386	0.831138	6.60586	0.00374567	1.01452	6.60586	0.000345707	1.77909	2.02024	0.880634	dodgerblue	PL06012A1F02	-0.454117	6.4259	0.0399509	NA	19,31	Intestine,Cathepsin+ cell	7	NA	NA	Q04446	GBE1	1,4-alpha-glucan-branching enzyme	0	676	62.13	Q9D6Y9	Gbe1	1,4-alpha-glucan-branching enzyme	0	676	62.278	NA	NA	NA	NA	NA	NA	A1Z992	AGBE	1,4-Alpha-Glucan branching enzyme	0	686	60.496	NA
dd_Smed_v6_2167_0_1	NA	RAP1B	Ras-related protein Rap-1b	987	3.07727	3.39949	1.21e-08	2.29744	3.39949	2.11e-05	8.44017	4.91584	1.71693	green	Contig5057	1.4256	7.88164	0.00331257	NA	NA	NA	NA	NA	NA	P61224	RAP1B	Ras-related protein Rap-1b	1.13e-92	170	75.882	Q99JI6	Rap1b	Ras-related protein Rap-1b	1.24e-92	170	75.882	Q6TEN1	rap1b	Ras-related protein Rap-1b	1.17e-92	170	75.882	P08645	R	Ras-like protein 3	1.94e-87	165	72.727	Q18246
dd_Smed_v6_2174_0_1	NA	NA	NA	1005	1.91503	6.34388	4.08e-11	1.90149	6.34388	6.57e-11	3.77122	3.73598	1.00943	darkblue	PL04003X1H06	-0.456932	8.9216	0.0233046	NA	6,11,24,25,30	Intestine,Epidermal,Pharynx	0,7	NA	NA	NA	NA	NA	NA	NA	NA	NA	NA	NA	NA	NA	NA	NA	NA	NA	NA	NA	NA	NA	NA	NA	NA	NA	NA	NA
dd_Smed_v6_2180_0_1	NA	PRKAR1B	cAMP-dependent protein kinase type I-beta regulatory subunit	790	1.09554	6.18916	0.00063459	0.79752	6.18916	0.0189562	2.13694	1.73811	1.22946	darkblue	Contig6556	0.580263	8.48038	0.0513187	NA	4,10,15,17,26,31	Cathepsin+ cell,Protonephridia	7	NA	NA	P31321	PRKAR1B	cAMP-dependent protein kinase type I-beta regulatory subunit	9.29e-86	171	72.515	P12849	Prkar1b	cAMP-dependent protein kinase type I-beta regulatory subunit	2.07e-85	171	72.515	A9C3T0	prkar2aa	Protein kinase, cAMP-dependent, regulatory, type II, alpha A	7.69e-37	168	38.095	P16905	Pka-R1	cAMP-dependent protein kinase type I regulatory subunit	2.06e-87	171	73.684	P30625
dd_Smed_v6_2183_0_1	NA	DUSP22	Dual specificity protein phosphatase 22	1159	1.07305	5.38748	0.000110517	0.771547	5.38748	0.00835401	2.10388	1.7071	1.23243	darkblue	Contig3397	1.06676	8.85798	0.000865428	NA	NA	NA	NA	NA	NA	Q9NRW4	DUSP22	Dual specificity protein phosphatase 22	6.5e-37	173	38.728	Q8R4V2	Dusp15	Dual specificity protein phosphatase 15	3.14e-39	172	40.116	Q1LWL2	dusp22a	Dual specificity protein phosphatase 22-A	5.93e-34	163	36.196	Q8IQK1	Dmel\CG10089	AT07276p	4.1e-34	177	38.983	O44128
dd_Smed_v6_2186_0_1	NA	EXOC6B	Exocyst complex component 6B	3012	2.01047	5.3714	8.78e-11	1.84898	5.3714	2.92e-09	4.02912	3.60245	1.11844	darkblue	Contig5590	0.112818	6.18177	0.436338	NA	17,30	Cathepsin+ cell,Intestine	NA	NA	NA	Q9Y2D4	EXOC6B	Exocyst complex component 6B	1.89e-130	859	31.781	A6H5Z3	Exoc6b	Exocyst complex component 6B	6.75e-131	859	31.781	A0A0R4ILM6	exoc6b	Exocyst complex component	2.59e-136	866	31.755	Q9VDE6	Sec15	Exocyst complex component 6	1.56e-98	814	27.641	Q18286
dd_Smed_v6_219_0_1	ctsc	CTSC	Dipeptidyl peptidase 1	1606	3.21565	9.88523	4.95e-25	3.2137	9.88523	5.71e-25	9.28979	9.27725	1.00135	darkblue	Contig6604	4.04494	12.287	0.000760785	uniform	10,15,17,28,30,39,41	Cathepsin+ cell,Intestine	4	phagocytes	Gut	P53634	CTSC	Dipeptidyl peptidase 1	8.72e-159	444	51.351	P97821	Ctsc	Dipeptidyl peptidase 1	3.76e-146	449	50.111	A2BF64	ctss2.2	Cathepsin S, ortholog 2, tandem duplicate 2	1.63e-37	244	35.656	Q7JWQ7	Swim	RE01730p	1.91e-36	306	30.392	P25807
dd_Smed_v6_21906_0_1	NA	ME1	NADP-dependent malic enzyme	951	5.15719	1.43549	3.33e-05	4.97977	1.43549	6.55e-05	35.6836	31.5543	1.13086	darkblue	PL08002A1F01	0.376059	6.58201	0.228297	NA	11	Epidermal	NA	NA	NA	P48163	ME1	NADP-dependent malic enzyme	8.01e-84	274	47.445	P06801	Me1	NADP-dependent malic enzyme	4.47e-87	274	48.54	H9GXV6	LOC101882012	Malic enzyme	7.77e-81	274	43.431	Q9NIW0	Men	Malic enzyme	5.53e-91	282	47.872	Q9U296
dd_Smed_v6_21959_0_1	NA	NA	NA	458	5.43784	1.81119	1.06e-08	5.54378	1.81119	7.17e-09	43.3464	46.6492	0.9292	dodgerblue	NA	NA	NA	NA	NA	NA	NA	NA	NA	NA	NA	NA	NA	NA	NA	NA	NA	NA	NA	NA	NA	NA	NA	NA	NA	NA	NA	NA	NA	NA	NA	NA	NA	NA	NA
dd_Smed_v6_2196_0_1	NA	NA	NA	612	1.59955	5.52878	0.00865104	1.55972	5.52878	0.0121194	3.03049	2.94797	1.02799	darkblue	NA	NA	NA	NA	NA	9,20,21,24,27,30,37,40	Neural,Epidermal,Pharynx,Intestine,Protonephridia	4	NA	NA	NA	NA	NA	NA	NA	NA	NA	NA	NA	NA	NA	NA	NA	NA	NA	NA	NA	NA	Q9VKA1	CG6583-RA	CG6583	5.44e-17	120	36.667	NA
dd_Smed_v6_2209_0_1	NA	DLG5	Disks large homolog 5	4204	1.3196	6.34033	7.82e-06	1.39278	6.34033	2.6e-06	2.49598	2.62584	0.950543	dodgerblue	Contig2642	0.472474	8.28128	0.0122411	NA	13,14,17,41	Muscle,Cathepsin+ cell	NA	NA	NA	Q8TDM6	DLG5	Disks large homolog 5	2.4e-06	179	22.346	E9Q9R9	Dlg5	Disks large homolog 5	1.31e-06	179	23.464	A0A0R4IHR7	tjp1b	Tight junction protein 1b	0.000501	217	21.659	M9PD90	Dlg5	CG6509, isoform D	3.37e-07	103	29.126	H1UBK8
dd_Smed_v6_2212_0_1	NA	NA	NA	693	1.97076	5.65529	4.04e-06	1.77096	5.65529	4.12e-05	3.91976	3.41282	1.14854	darkblue	NA	NA	NA	NA	NA	10,28,30,39	Cathepsin+ cell,Intestine	4	NA	NA	NA	NA	NA	NA	NA	NA	NA	NA	NA	NA	NA	NA	NA	NA	NA	NA	NA	NA	NA	NA	NA	NA	NA	NA	NA
dd_Smed_v6_2215_0_1	NA	FAM46D	Protein FAM46D	5103	2.35842	3.9758	1.86e-06	2.67477	3.9758	8.02e-08	5.12809	6.38536	0.803101	dodgerblue	NA	NA	NA	NA	NA	17,31	Cathepsin+ cell	NA	NA	NA	Q8NEK8	FAM46D	Protein FAM46D	9.56e-52	336	35.417	Q5SSF7	Fam46c	Protein FAM46C	9.91e-49	337	34.125	A0JPF6	fam46ba	Family with sequence similarity 46, member B	1.94e-52	347	34.87	A1Z745	CG30497	Uncharacterized protein, isoform C	1.59e-54	356	36.798	NA
dd_Smed_v6_22158_0_1	NA	NA	NA	430	6.11935	0.891368	0.000336269	5.56951	0.891368	0.00106309	69.5196	47.4886	1.46392	darkblue	NA	NA	NA	NA	NA	NA	NA	NA	NA	NA	NA	NA	NA	NA	NA	NA	NA	NA	NA	NA	NA	NA	NA	NA	NA	NA	NA	NA	NA	NA	NA	NA	NA	NA	NA
dd_Smed_v6_2219_0_1	hal	HAL	Histidine ammonia-lyase	1125	5.78735	6.93603	3.99e-64	5.67341	6.93603	3.94e-62	55.2287	51.0348	1.08218	darkblue	Contig6136	0.45527	8.39591	0.0419948	uniform	6,19,30	Intestine	5,7	phagocytes	NA	P42357	HAL	Histidine ammonia-lyase	1.2e-150	315	66.667	P35492	Hal	Histidine ammonia-lyase	5.95e-150	315	66.349	A4FUP1	hal	Histidine ammonia-lyase	7.2e-151	314	66.242	NA	NA	NA	NA	NA	NA	Q20502
dd_Smed_v6_2224_0_1	NA	ENPEP	Aminopeptidase	3262	4.16877	4.0147	4.92e-11	4.34273	4.0147	1.17e-11	17.9856	20.2904	0.886409	dodgerblue	PL06012A1D10	0.513881	6.91594	0.027212	NA	6,26,27,29,30	Intestine,Protonephridia,Pharynx	0,7	NA	NA	B0BCY9	ENPEP	Aminopeptidase	4.32e-78	748	27.674	P16406	Enpep	Glutamyl aminopeptidase	3.13e-74	747	28.112	E7F123	si:ch211-106j24.1	Aminopeptidase	4.57e-71	748	26.07	Q8INH6	CG32473-RC	Aminopeptidase	5e-76	759	28.327	Q22317
dd_Smed_v6_2226_0_1	NA	EEF2K	Eukaryotic elongation factor 2 kinase	708	2.90704	2.44937	0.000320149	3.48748	2.44937	2.16e-05	7.50079	11.2159	0.668761	dodgerblue	PL08006B1H11	0.509727	8.10666	0.201994	NA	38	Parapharyngeal	NA	NA	NA	O00418	EEF2K	Eukaryotic elongation factor 2 kinase	2.94e-28	148	43.243	O08796	Eef2k	Eukaryotic elongation factor 2 kinase	5.73e-29	148	43.919	E7F318	eef2k	Eukaryotic elongation factor 2 kinase	1.37e-25	162	38.889	NA	NA	NA	NA	NA	NA	O01991
dd_Smed_v6_2228_0_1	NA	ACF	Apobec-1 complementation factor, isoform CRA_b	2839	1.81135	7.36128	1.32e-10	1.98677	7.36128	2.17e-12	3.50972	3.96349	0.885511	dodgerblue	Contig5391	1.43904	7.64225	6.84e-05	NA	4,10,15,17,26,28,29,30,31,39,41,42	Cathepsin+ cell,Protonephridia,Intestine	4,7	pgrn+ parenchymal cells,aqp+ parenchymal cells	Cathepsin+ b	A0A024QZJ5	ACF	Apobec-1 complementation factor, isoform CRA_b	8.43e-117	364	51.374	Q91WT8	Rbm47	RNA-binding protein 47	1.33e-113	355	53.521	A2BIC5	rbm47	RNA-binding motif protein 47	9.89e-124	321	56.386	A4V364	Syp	Syncrip, isoform F	1.21e-86	285	49.825	Q9NLD1
dd_Smed_v6_2230_0_1	NA	ATP1B2	Sodium/potassium-transporting ATPase subunit beta-2	1318	2.58378	5.74516	6.7e-16	2.50762	5.74516	4.81e-15	5.99508	5.6868	1.05421	darkblue	Contig6169	1.70263	9.9018	0.000786581	NA	9,20,21,24,26,30,33,37	Neural,Epidermal,Protonephridia,Intestine,Pharynx	4,7	NA	NA	P14415	ATP1B2	Sodium/potassium-transporting ATPase subunit beta-2	5.01e-23	280	25.357	P14094	Atp1b1	Sodium/potassium-transporting ATPase subunit beta-1	1.24e-20	279	28.674	Q9DGL3	atp1b1a	Sodium/potassium-transporting ATPase subunit beta	7.81e-19	282	25.177	Q24046	nrv1	Sodium/potassium-transporting ATPase subunit beta-1	5.65e-29	297	26.936	NA
dd_Smed_v6_2234_0_1	NA	NA	NA	3408	1.64357	7.06147	2.67e-07	1.7736	7.06147	3.15e-08	3.12438	3.41906	0.913813	dodgerblue	Contig4042	0.476283	6.65178	0.0191412	NA	10,15,17,28,30,39,41	Cathepsin+ cell,Intestine	4	NA	Cathepsin+ b	NA	NA	NA	NA	NA	NA	NA	NA	NA	NA	NA	NA	NA	NA	NA	NA	NA	NA	NA	NA	NA	NA	NA	NA	NA
dd_Smed_v6_2235_0_1	NA	OSTF1	Osteoclast-stimulating factor 1	2530	1.2653	6.11762	2.6e-05	0.973511	6.11762	0.0017502	2.40377	1.96361	1.22415	darkblue	Contig516	1.08876	9.45134	0.000255874	NA	10,17,28,29,30,39	Cathepsin+ cell,Protonephridia,Intestine	4	NA	NA	Q92882	OSTF1	Osteoclast-stimulating factor 1	5.07e-66	204	52.451	Q62422	Ostf1	Osteoclast-stimulating factor 1	6.51e-66	205	52.683	Q4VBW1	psmd10	Proteasome (Prosome, macropain) 26S subunit, non-ATPase, 10	1.69e-16	111	36.937	Q9VBP3	Tnks	Tankyrase	6.74e-14	115	39.13	Q95PX0
dd_Smed_v6_2239_0_1	NA	PTP4A3	Protein tyrosine phosphatase type IVA 3	918	1.48362	6.17402	2.46e-08	1.1785	6.17402	1.35e-05	2.7965	2.26342	1.23552	darkblue	Contig1506	1.1362	9.13973	0.00028237	NA	29,30	Protonephridia,Intestine	4	NA	NA	O75365	PTP4A3	Protein tyrosine phosphatase type IVA 3	3.43e-48	158	45.57	Q9D658	Ptp4a3	Protein tyrosine phosphatase type IVA 3	1.2e-48	158	46.203	Q6NX92	ptp4a3	Protein tyrosine phosphatase type IVA, member 3	1.11e-48	158	47.468	O61722	PRL-1	PRL-1 phosphatase, isoform A	5.84e-47	155	45.806	G5EG43
dd_Smed_v6_22397_0_1	NA	NA	NA	924	5.24779	0.94541	0.000518087	5.39089	0.94541	0.00043924	37.9965	41.9584	0.905576	dodgerblue	Contig5050	0.423244	6.33798	0.0242633	NA	NA	NA	NA	NA	NA	NA	NA	NA	NA	NA	NA	NA	NA	NA	NA	NA	NA	NA	NA	NA	NA	NA	NA	NA	NA	NA	NA	NA	NA	NA
dd_Smed_v6_2249_0_1	NA	PEX13	Peroxisomal membrane protein PEX13	1044	1.67821	6.21972	3.9e-10	1.50183	6.21972	2.76e-08	3.2003	2.83201	1.13005	darkblue	Contig2483	0.631534	7.33601	0.0113006	NA	30	Intestine	NA	NA	NA	Q92968	PEX13	Peroxisomal membrane protein PEX13	1.29e-12	298	21.812	Q9D0K1	Pex13	Peroxisomal membrane protein PEX13	4.81e-12	298	22.148	NA	NA	NA	NA	NA	NA	NA	NA	NA	NA	NA	NA	NA
dd_Smed_v6_2256_0_1	NA	TSPO	Translocator protein	794	1.13696	4.63626	0.000351025	0.448501	4.63626	0.239936	2.19917	1.36462	1.61156	green	Contig831	-0.0209423	9.69641	0.818007	NA	2,11	Epidermal	7	NA	NA	P30536	TSPO	Translocator protein	1.66e-30	138	42.754	P50637	Tspo	Translocator protein	5.53e-32	153	37.255	Q5XJB6	tspo	Translocator protein	1.4e-39	153	45.752	Q9VPR1	Tspo	GH02075p	5.12e-38	157	42.038	NA
dd_Smed_v6_2257_0_1	NA	CYP3A43/CYP3A4	Cytochrome P450	2300	3.1366	5.90305	1e-18	3.00787	5.90305	2.12e-17	8.79452	8.04377	1.09333	darkblue	Contig7163	1.53985	8.01637	0.00314838	NA	20,30,33	Neural,Intestine	4	NA	NA	Q86SK3	CYP3A43/CYP3A4	Cytochrome P450	2.67e-99	503	38.767	Q9JMA7	Cyp3a41a	Cytochrome P450 3A41	1.93e-103	457	39.825	Q6GQP0	cyp3a65	Cyp3a65 protein	6.44e-94	472	36.653	Q9W130	Cyp9c1	Cytochrome P450 9c1	5.26e-74	470	33.191	Q27476
dd_Smed_v6_2260_0_1	NA	NA	NA	3054	1.35458	7.56937	0.000118796	1.15012	7.56937	0.00145126	2.55723	2.21932	1.15226	darkblue	Contig5269	0.996316	8.07979	0.000350039	NA	10,13,14,17,28,30,31,39	Cathepsin+ cell,Muscle,Intestine	4	aqp+ parenchymal cells,psap+ parenchymal cells	Cathepsin+ b	NA	NA	NA	NA	NA	NA	NA	NA	NA	NA	NA	NA	NA	NA	NA	NA	NA	NA	NA	NA	NA	NA	NA	NA	NA
dd_Smed_v6_2262_0_1	NA	NA	NA	961	1.08131	7.08756	0.000237317	1.12498	7.08756	0.000144013	2.11596	2.18099	0.970184	dodgerblue	Contig5960	2.07647	8.99958	0.000647427	NA	24,27,30,33,37,38	Epidermal,Pharynx,Intestine,Neural,Parapharyngeal	4	NA	NA	NA	NA	NA	NA	NA	NA	NA	NA	NA	NA	NA	NA	NA	NA	NA	NA	NA	NA	NA	NA	NA	NA	NA	NA	NA
dd_Smed_v6_2267_0_1	NA	EIF5	Eukaryotic translation initiation factor 5	1604	1.00735	5.8833	0.000864981	0.755849	5.8833	0.0180983	2.01022	1.68863	1.19044	darkblue	Contig5092	0.518184	8.70654	0.111362	NA	NA	NA	NA	NA	NA	P55010	EIF5	Eukaryotic translation initiation factor 5	1.57e-72	399	40.1	P59325	Eif5	Eukaryotic translation initiation factor 5	2.93e-72	397	40.302	Q7ZWA9	eif5	Eukaryotic translation initiation factor 5	2.82e-68	382	39.791	Q9VXK6	eIF5	Eukaryotic translation initiation factor 5	2.44e-58	415	33.735	Q22918
dd_Smed_v6_2271_0_1	NA	SNX32	Sorting nexin-32	1911	2.32897	6.14152	4.06e-15	2.08555	6.14152	2.1e-12	5.02446	4.24437	1.18379	darkblue	Contig1649	1.0016	8.27237	0.000286079	NA	10,15,17,28,30	Cathepsin+ cell,Intestine	4	NA	NA	Q86XE0	SNX32	Sorting nexin-32	6.59e-132	397	53.652	Q6P8X1	Snx6	Sorting nexin-6	6.25e-130	399	54.135	F8W5C6	snx6	Sorting nexin	3.55e-130	400	54.5	Q9VLQ9	Snx6	Sorting nexin	4.27e-120	377	52.785	D9PTP6
dd_Smed_v6_2272_0_1	NA	FLNB	Filamin-B	7316	1.35908	6.37391	1.36e-06	1.11622	6.37391	9.98e-05	2.56522	2.16778	1.18334	darkblue	Contig3925	0.0891459	6.49646	0.459579	NA	4,10,24,37	Cathepsin+ cell,Epidermal,Pharynx	7	NA	NA	O75369	FLNB	Filamin-B	0	2015	38.561	Q80X90	Flnb	Filamin-B	0	2015	38.511	A0A0R4IUS4	flnca	Filamin C, gamma a (actin-binding protein 280)	0	2105	35.677	Q9VEN1	cher	Filamin-A	0	2247	43.08	D0IMZ8
dd_Smed_v6_2277_0_1	NA	TRAF6	TNF receptor-associated factor 6	1132	1.07775	5.0223	0.0030771	1.58142	5.0223	9.15e-06	2.11074	2.99263	0.705311	dodgerblue	Contig1182	0.747643	6.98263	0.280856	NA	NA	NA	NA	NA	NA	Q9Y4K3	TRAF6	TNF receptor-associated factor 6	3.33e-06	133	27.068	P70196	Traf6	TNF receptor-associated factor 6	3.17e-05	133	27.068	Q6IWL4	traf6	TNF receptor-associated factor 6	0.000125	113	28.319	Q9W3I9	Traf6	GH01161p	0.000363	143	23.077	NA
dd_Smed_v6_2281_0_1	NA	SFT2D1	Vesicle transport protein SFT2A	854	1.59694	5.9173	8.11e-09	1.45372	5.9173	1.97e-07	3.02501	2.73913	1.10437	darkblue	Contig3158	1.53081	8.71991	9.87e-05	NA	17	Cathepsin+ cell	NA	NA	NA	Q8WV19	SFT2D1	Vesicle transport protein SFT2A	8.05e-50	160	50.625	Q5SSN7	Sft2d1	Vesicle transport protein SFT2A	2.4e-49	160	48.75	F1QQJ6	sft2d1	Vesicle transport protein	2.37e-46	162	52.469	Q9VPD4	BcDNA:RH26504	Vesicle transport protein	1.46e-46	160	48.75	Q7YTP0
dd_Smed_v6_2282_0_1	NA	CPA4	Carboxypeptidase A4	1779	0.759191	5.40889	0.0211091	1.11782	5.40889	0.00043265	1.69254	2.17018	0.779906	dodgerblue	Contig1315	0.784258	8.2519	0.000785548	NA	7,10,13,14,16,28,30,31,42	Muscle,Cathepsin+ cell,Intestine	4	pigment,glia	NA	Q9UI42	CPA4	Carboxypeptidase A4	2.64e-61	393	33.079	Q504N0	Cpa2	Carboxypeptidase A2	8.64e-62	419	30.31	F1QVD7	cpa2	Carboxypeptidase A2 (pancreatic)	1.06e-57	414	31.643	Q961J8	CT14378	CG8560, isoform A	8.02e-63	402	31.592	H2L0K5
dd_Smed_v6_229_0_1	novel	NA	NA	519	4.40992	9.40925	2.38e-26	4.30231	9.40925	2.57e-25	21.2579	19.7299	1.07744	darkblue	Contig7567	4.16819	11.8347	0.000610954	uniform; marginal cells	4,10,15,17,26,28,30,39,40,41	Cathepsin+ cell,Protonephridia,Intestine	4,7	phagocytes,ldlrr-1+ parenchymal cells	NA	NA	NA	NA	NA	NA	NA	NA	NA	NA	NA	NA	NA	NA	NA	NA	NA	NA	NA	NA	NA	NA	NA	NA	NA	NA
dd_Smed_v6_2290_0_1	NA	HSD17B14	17-beta-hydroxysteroid dehydrogenase 14	1051	3.27201	7.24721	5.33e-22	3.02262	7.24721	3.31e-19	9.6599	8.12643	1.1887	darkblue	Contig5582	1.30895	8.92328	0.000139649	NA	10,19,30	Cathepsin+ cell,Intestine	4,5,7	NA	NA	Q9BPX1	HSD17B14	17-beta-hydroxysteroid dehydrogenase 14	2.02e-56	246	40.65	E9Q3D4	Hsd17b14	Hydroxysteroid (17-beta) dehydrogenase 14	7.33e-56	250	42.8	Q642M8	zgc:101858	Zgc:101858	1.26e-24	221	31.674	Q9VRJ4	Dmel\CG10672	SD02021p	3.34e-25	240	32.917	G5EGA6
dd_Smed_v6_2291_0_1	NA	SRC	Proto-oncogene tyrosine-protein kinase Src	1700	3.72894	3.10925	4.87e-10	4.12933	3.10925	1.09e-11	13.2594	17.5006	0.757654	dodgerblue	NA	NA	NA	NA	NA	30,38	Intestine,Parapharyngeal	4,7	NA	NA	P12931	SRC	Proto-oncogene tyrosine-protein kinase Src	7.61e-106	460	41.522	P05480	Src	Neuronal proto-oncogene tyrosine-protein kinase Src	2.25e-104	465	41.075	Q66I04	lyn	Tyrosine-protein kinase	8.75e-106	465	40.86	P00528	Src64B	Tyrosine-protein kinase Src64B	1.51e-98	468	38.034	O45539
dd_Smed_v6_2299_0_1	NA	USP20	Ubiquitin carboxyl-terminal hydrolase 20	1022	2.41833	2.42011	0.000446562	2.85435	2.42011	3.96e-05	5.34552	7.23179	0.73917	dodgerblue	NA	NA	NA	NA	NA	17,20,21,23,24,30,33	Cathepsin+ cell,Neural,Epidermal,Intestine	4	NA	NA	Q9Y2K6	USP20	Ubiquitin carboxyl-terminal hydrolase 20	0.000264	33	54.545	Q8C6M1	Usp20	Ubiquitin carboxyl-terminal hydrolase 20	0.00023	33	57.576	A8HAL1	usp16	Ubiquitin carboxyl-terminal hydrolase 16	4.59e-05	33	54.545	NA	NA	NA	NA	NA	NA	NA
dd_Smed_v6_2304_0_1	NA	SCARB2	Lysosome membrane protein 2	1690	2.34846	6.74405	2.98e-16	2.33511	6.74405	4.97e-16	5.0928	5.04589	1.0093	darkblue	Contig2148	2.26275	8.60287	4.64e-05	NA	30	Intestine	4	NA	NA	Q14108	SCARB2	Lysosome membrane protein 2	2.69e-96	416	37.74	O35114	Scarb2	Lysosome membrane protein 2	2.62e-95	406	37.931	Q8JGR8	scarb2	Lysosome membrane protein II	4.77e-97	442	37.783	Q27367	crq	Protein croquemort	1.77e-63	446	30.045	NA
dd_Smed_v6_23048_0_1	NA	NA	NA	783	5.59555	0.585249	0.000794674	5.28838	0.585249	0.00160831	48.3534	39.0806	1.23728	darkblue	NA	NA	NA	NA	NA	NA	NA	NA	NA	NA	NA	NA	NA	NA	NA	NA	NA	NA	NA	NA	NA	NA	NA	NA	NA	NA	NA	NA	NA	NA	NA	NA	NA	NA	NA
dd_Smed_v6_23064_0_1	NA	NA	NA	377	6.56262	1.28951	4.8e-05	6.59073	1.28951	5.24e-05	94.525	96.3843	0.98071	dodgerblue	PL04006A2A08	0.224842	6.09473	0.128553	NA	NA	NA	NA	NA	NA	NA	NA	NA	NA	NA	NA	NA	NA	NA	NA	NA	NA	NA	NA	NA	NA	NA	NA	NA	NA	NA	NA	NA	NA	NA
dd_Smed_v6_231_0_1	NA	TBCA	Tubulin-specific chaperone A	504	1.32408	8.13802	1.56e-05	1.30798	8.13802	2.31e-05	2.50374	2.47595	1.01122	darkblue	Contig249	1.74117	10.3121	0.000366714	NA	30	Intestine	NA	NA	Neoblast	Q6FGD7	TBCA	Tubulin-specific chaperone A	9.28e-29	103	51.456	P48428	Tbca	Tubulin-specific chaperone A	3.88e-28	103	50.485	NA	NA	NA	NA	NA	NA	NA	NA	NA	NA	NA	NA	NA
dd_Smed_v6_2311_0_1	NA	ELOVL4	Elongation of very long chain fatty acids protein 4	1025	2.64173	5.20341	4.15e-18	2.48775	5.20341	2.93e-16	6.24081	5.60904	1.11263	darkblue	Contig6090	2.40665	9.33475	0.00064886	NA	10,13,16,19,22,30	Cathepsin+ cell,Muscle,Intestine,Neoblast	NA	NA	NA	Q9GZR5	ELOVL4	Elongation of very long chain fatty acids protein 4	1.2e-63	274	43.431	Q9EQC4	Elovl4	Elongation of very long chain fatty acids protein 4	8.53e-63	249	46.185	A7MCJ3	elovl4b	Elongation of very long chain fatty acids protein	5.05e-63	252	44.048	Q8IPL8	CG9798	Elongation of very long chain fatty acids protein	1.58e-54	231	39.394	Q03574
dd_Smed_v6_2318_0_1	NA	NA	NA	4270	4.03209	6.12493	3.9e-38	3.90498	6.12493	3.68e-36	16.3599	14.9801	1.09211	darkblue	Contig5910	1.0482	6.2591	0.00628573	NA	30	Intestine	4	NA	NA	NA	NA	NA	NA	NA	NA	Q9QUK6	Tlr4	Toll-like receptor 4	0.000437	397	24.181	B3DIN1	tlr5b	Tlr5b protein	5.18e-06	246	27.236	A1Z9N6	conv	Acid labile subunit	5.84e-06	204	26.961	Q965M2
dd_Smed_v6_2328_0_1	NA	MTAP	S-methyl-5'-thioadenosine phosphorylase	1419	0.981602	5.10257	0.00173583	1.19247	5.10257	0.00012291	1.97466	2.28544	0.864015	dodgerblue	Contig5155	-0.460184	7.18969	0.300035	NA	4,10,15,19,28,31,42	Cathepsin+ cell,Intestine	2,5	pgrn+ parenchymal cells,pigment,glia	Cathepsin+ a	Q13126	MTAP	S-methyl-5'-thioadenosine phosphorylase	1.28e-95	271	50.923	Q9CQ65	Mtap	S-methyl-5'-thioadenosine phosphorylase	3.84e-97	271	52.03	NA	NA	NA	NA	NA	NA	Q9V813	Mtap	S-methyl-5'-thioadenosine phosphorylase	2.93e-85	258	48.837	NA
dd_Smed_v6_2329_0_1	NA	HEL-S-44	Superoxide dismutase [Cu-Zn]	759	1.22451	5.59345	3.46e-05	1.41011	5.59345	1.82e-06	2.33676	2.65758	0.87928	dodgerblue	Contig3393	-0.0721341	6.56047	0.119466	NA	11	Epidermal	5	NA	Cluster 11	V9HWC9	HEL-S-44	Superoxide dismutase [Cu-Zn]	7.6e-32	158	40.506	P08228	Sod1	Superoxide dismutase [Cu-Zn]	9.5e-33	128	45.312	O73872	sod1	Superoxide dismutase [Cu-Zn]	1.82e-35	157	43.949	Q7JR71	Sod3	Extracellular superoxide dismutase [Cu-Zn]	3.66e-32	174	40.23	G5ECR5
dd_Smed_v6_2336_0_1	NA	HMCN1	Hemicentin-1	1937	4.3843	5.71054	1.95e-35	4.37653	5.71054	2.49e-35	20.8837	20.7715	1.0054	darkblue	PL05002B2A04	0.357483	7.37498	0.081059	NA	30	Intestine	4,7	NA	NA	Q96RW7	HMCN1	Hemicentin-1	1.88e-05	309	23.948	Q4VA61	Dscaml1	Down syndrome cell adhesion molecule-like protein 1 homolog	5.46e-05	97	26.804	F1R7R3	hmcn1	Hemicentin 1	2.39e-07	201	26.368	NA	NA	NA	NA	NA	NA	Q9U3P2
dd_Smed_v6_2345_0_1	NA	ADD1	Alpha-adducin	3078	1.09675	7.77195	0.000507489	0.939075	7.77195	0.00389591	2.13873	1.9173	1.11549	darkblue	Contig2079	-0.0479102	7.62265	0.753417	NA	8,9,11,18,19,20,27,33,36	Neural,Epidermal,Intestine,Pharynx	5,7	otf+ cells 2,late epidermal progenitors 2	NA	P35611	ADD1	Alpha-adducin	1.71e-91	730	31.781	Q9QYC0	Add1	Alpha-adducin	3.58e-91	738	31.301	A1A5X4	add1	Adducin 1 (Alpha)	1.55e-90	730	31.507	Q02645	hts	Protein hu-li tai shao	1.51e-86	656	31.555	G8JYB0
dd_Smed_v6_2350_0_1	NA	NA	NA	1308	1.99512	4.19476	5.35e-07	2.29897	4.19476	8.69e-09	3.98649	4.92106	0.810087	dodgerblue	PL05003B2C05	0.922752	7.073	0.00182559	NA	15,17,30,41	Cathepsin+ cell,Intestine	NA	NA	Cathepsin+ b	NA	NA	NA	NA	NA	NA	NA	NA	NA	NA	NA	NA	NA	NA	NA	NA	NA	NA	NA	NA	NA	NA	NA	NA	NA
dd_Smed_v6_2351_0_1	cyp2b19	CYP2B6	Cytochrome P450 2B6	2759	2.33813	4.67198	7.67e-12	2.32031	4.67198	1.29e-11	5.05648	4.99439	1.01243	darkblue	Contig1511	1.86189	9.13369	7.11e-05	uniform	11,24,30,42	Epidermal,Intestine,Cathepsin+ cell	4	NA	NA	P20813	CYP2B6	Cytochrome P450 2B6	1.02e-73	429	34.732	O55071	Cyp2b19	Cytochrome P450 2B19	3.74e-77	485	32.784	Q5TZ86	cyp2p8	Cytochrome P450, family 2, subfamily J, polypeptide 23	1.55e-75	473	35.095	Q95078	Cyp18a1	Cytochrome P450 18a1	6.32e-66	488	30.943	O44704
dd_Smed_v6_2361_0_1	slc47a1	SLC47A1	Multidrug and toxin extrusion protein 1	1939	7.04158	5.77682	7.34e-26	7.07888	5.77682	5.32e-26	131.743	135.194	0.974477	dodgerblue	PL06018A2B12	1.30175	7.53937	0.00830667	uniform	30	Intestine	4	NA	NA	Q96FL8	SLC47A1	Multidrug and toxin extrusion protein 1	2e-90	447	36.242	Q8K0H1	Slc47a1	Multidrug and toxin extrusion protein 1	1.5e-88	458	34.498	A1L1P9	slc47a1	Multidrug and toxin extrusion protein 1	1.06e-96	519	32.177	NA	NA	NA	NA	NA	NA	NA
dd_Smed_v6_2368_0_1	novel	NA	NA	1166	2.84491	5.19702	4.61e-15	3.03878	5.19702	8.95e-17	7.1846	8.21793	0.874259	dodgerblue	Contig924	3.40526	9.29525	2.29e-05	uniform subset	29,30	Protonephridia,Intestine	4	NA	NA	NA	NA	NA	NA	NA	NA	NA	NA	NA	NA	NA	NA	NA	NA	NA	NA	NA	NA	NA	NA	NA	NA	NA	NA	NA
dd_Smed_v6_2387_0_1	NA	NCKAP1	Nck-associated protein 1	3994	1.70227	5.71105	1.27e-08	1.63803	5.71105	5.3e-08	3.25413	3.11241	1.04553	darkblue	Contig5865	1.52313	8.15431	0.000746504	NA	10,24,28,30,39	Cathepsin+ cell,Epidermal,Intestine	4	NA	NA	Q9Y2A7	NCKAP1	Nck-associated protein 1	1.12e-145	1193	28.248	P28660	Nckap1	Nck-associated protein 1	1.9e-145	1193	28.248	T1ECV5	nckap1	Nck-associated protein 1	2.78e-28	247	30.364	P55162	Hem	Membrane-associated protein Hem	7.32e-143	1190	29.16	P55163
dd_Smed_v6_2388_0_1	NA	PPT1	Palmitoyl-protein thioesterase 1	1422	1.37969	6.81093	1.89e-06	1.18072	6.81093	6.06e-05	2.60213	2.26689	1.14788	darkblue	Contig2665	1.96628	8.80249	4.31e-05	NA	10,17,24,28,30,39,41	Cathepsin+ cell,Epidermal,Intestine	4	psap+ parenchymal cells	Cathepsin+ b	P50897	PPT1	Palmitoyl-protein thioesterase 1	1.52e-117	280	57.857	O88531	Ppt1	Palmitoyl-protein thioesterase 1	7.74e-115	280	57.143	F1R8J6	ppt1	Palmitoyl-protein thioesterase 1 (ceroid-lipofuscinosis, neuronal 1, infantile)	3.09e-108	274	54.38	Q9W3C7	Ppt1	Palmitoyl-protein thioesterase 1	3.23e-89	281	49.822	Q20390
dd_Smed_v6_2391_0_1	NA	TRAF6	TNF receptor-associated factor 6	4239	1.29562	6.0109	0.000199244	1.22396	6.0109	0.000538477	2.45483	2.33587	1.05093	darkblue	Contig1407	0.938036	7.655	0.000262823	NA	10,15,17,28	Cathepsin+ cell	NA	NA	NA	Q9Y4K3	TRAF6	TNF receptor-associated factor 6	9.19e-07	110	30.909	P70196	Traf6	TNF receptor-associated factor 6	3.96e-06	110	30.909	Q6IWL4	traf6	TNF receptor-associated factor 6	1.22e-06	177	21.469	Q9XYQ9	Traf6	TNF-receptor-associated factor 2	6.42e-11	354	20.904	NA
dd_Smed_v6_2394_0_1	NA	CYP2J2	Cytochrome P450 2J2	1771	3.36827	5.09526	2.43e-15	3.3747	5.09526	2.48e-15	10.3264	10.3725	0.995558	dodgerblue	NA	NA	NA	NA	NA	10,19,31	Cathepsin+ cell,Intestine	5	NA	NA	P51589	CYP2J2	Cytochrome P450 2J2	1.15e-36	432	27.083	O54750	Cyp2j6	Cytochrome P450 2J6	1.14e-36	420	27.619	Q5TZ86	cyp2p8	Cytochrome P450, family 2, subfamily J, polypeptide 23	8.05e-36	432	25.231	Q95078	Cyp18a1	Cytochrome P450 18a1	2.01e-30	432	26.157	O16482
dd_Smed_v6_2397_0_1	NA	NA	NA	1841	1.36874	5.27387	4.6e-05	0.689497	5.27387	0.0652991	2.58244	1.61272	1.6013	green	Contig3099	0.112261	7.91988	0.466104	NA	13,19	Muscle,Intestine	NA	NA	NA	NA	NA	NA	NA	NA	NA	NA	NA	NA	NA	NA	NA	NA	NA	NA	NA	NA	NA	NA	NA	NA	NA	NA	NA	NA
dd_Smed_v6_2398_0_1	NA	NA	NA	1050	1.2223	4.37081	0.00449257	0.60181	4.37081	0.229233	2.33318	1.51762	1.5374	green	Contig4193	0.561071	7.52391	0.112685	NA	21,23,33	Neural	NA	NA	Neoblast	NA	NA	NA	NA	NA	NA	NA	NA	NA	NA	NA	NA	NA	NA	NA	NA	NA	NA	NA	NA	NA	NA	NA	NA	NA
dd_Smed_v6_2399_0_1	NA	CAPZA2	F-actin-capping protein subunit alpha-2	1410	1.71417	6.95733	8.95e-07	1.73772	6.95733	7.39e-07	3.28107	3.33507	0.983807	dodgerblue	Contig6139	1.14882	8.08046	0.00326467	NA	10,15,17,20,28,30,37	Cathepsin+ cell,Neural,Intestine,Pharynx	4	NA	NA	P47755	CAPZA2	F-actin-capping protein subunit alpha-2	3.95e-81	287	48.78	P47754	Capza2	F-actin-capping protein subunit alpha-2	4.26e-79	287	48.432	Q6NWK1	capza1a	Capping protein (Actin filament) muscle Z-line, alpha 1	1.24e-74	283	46.996	Q9W2N0	cpa	F-actin-capping protein subunit alpha	1.46e-78	287	43.206	P34685
dd_Smed_v6_2401_0_1	NA	NA	NA	601	3.28368	5.0261	9.22e-14	3.17589	5.0261	5.76e-13	9.73837	9.03731	1.07757	darkblue	Contig6834	1.83828	8.46473	0.00251695	NA	15,16,24,30,34	Cathepsin+ cell,Muscle,Epidermal,Intestine,Neural	4	NA	NA	NA	NA	NA	NA	NA	NA	NA	NA	NA	NA	NA	NA	NA	NA	NA	NA	NA	NA	NA	NA	NA	NA	NA	NA	NA
dd_Smed_v6_241_0_1	psap	PSAP	Prosaposin	1722	3.60112	8.45703	1.32e-16	3.81663	8.45703	3.8e-18	12.1352	14.0903	0.861242	dodgerblue	Contig3945	4.1994	12.0977	2.6e-05	uniform	10,15,17,28,29,30,31,39,40,41,42	Cathepsin+ cell,Protonephridia,Intestine	4	phagocytes,aqp+ parenchymal cells,ldlrr-1+ parenchymal cells,psap+ parenchymal cells	NA	P07602	PSAP	Prosaposin	1.33e-15	482	20.539	Q8C1C1	Psapl1	Proactivator polypeptide-like 1	9.63e-11	516	20.543	E7FCT1	psap	Prosaposin	3.11e-08	318	23.585	Q9U9P3	Sap-r	Ecdysone dependent glycoprotein	8.74e-14	361	22.161	Q18276
dd_Smed_v6_2414_0_1	NA	ACSBG2	Long-chain-fatty-acid--CoA ligase ACSBG2	2920	1.14559	5.43775	9.21e-05	1.51313	5.43775	1.88e-07	2.21237	2.85428	0.775107	dodgerblue	Contig5096	0.0832364	7.88163	0.581232	NA	10,15,19,27,28,31	Cathepsin+ cell,Intestine,Pharynx	2,5	goblet cells	NA	Q5FVE4	ACSBG2	Long-chain-fatty-acid--CoA ligase ACSBG2	1.35e-159	627	42.424	Q2XU92	Acsbg2	Long-chain-fatty-acid--CoA ligase ACSBG2	7.31e-158	626	42.812	F1QDA6	acsl1b	Acyl-CoA synthetase long-chain family member 1b	1.17e-34	606	25.908	Q9V3S9	bgm	Very long-chain-fatty-acid--CoA ligase bubblegum	3e-146	620	41.774	Q9UAV8
dd_Smed_v6_2424_0_1	NA	ZDHHC17	Palmitoyltransferase ZDHHC17	2925	0.710176	5.10099	0.0897783	1.33057	5.10099	0.00064904	1.636	2.51501	0.650495	orange	Contig5919	0.0706945	6.42112	0.421205	NA	NA	NA	NA	NA	NA	Q8IUH5	ZDHHC17	Palmitoyltransferase ZDHHC17	1.23e-33	550	23.818	Q80TN5	Zdhhc17	Palmitoyltransferase ZDHHC17	3.14e-33	550	23.818	A0A0R4IAY3	zdhhc17	Palmitoyltransferase	4.8e-37	570	25.439	Q9VKB1	Patsas	Palmitoyltransferase	3.25e-96	503	34.592	Q18409
dd_Smed_v6_2429_0_1	NA	NA	NA	1374	2.28645	5.25115	1.85e-12	2.14801	5.25115	4.08e-11	4.87853	4.43215	1.10071	darkblue	NA	NA	NA	NA	NA	2,11,24,25,27,30,37	Epidermal,Pharynx,Intestine	4	NA	NA	NA	NA	NA	NA	NA	NA	NA	NA	NA	NA	NA	NA	NA	NA	NA	NA	NA	NA	NA	NA	NA	NA	NA	NA	NA
dd_Smed_v6_2433_0_1	NA	NA	NA	958	1.9735	4.83744	5.94e-06	2.03429	4.83744	3.48e-06	3.9272	4.0962	0.958742	dodgerblue	Contig159	0.0418911	7.91759	0.837275	NA	19,26,29,40	Intestine,Protonephridia	2,5	NA	NA	NA	NA	NA	NA	NA	NA	NA	NA	NA	NA	NA	NA	NA	NA	NA	NA	NA	NA	NA	NA	NA	NA	NA	NA	NA
dd_Smed_v6_2445_0_1	NA	GPAT4	Glycerol-3-phosphate acyltransferase 4	1794	1.25964	5.84317	1.07e-05	1.23287	5.84317	1.93e-05	2.39436	2.35033	1.01873	darkblue	Contig3816	0.874764	8.55766	0.000469204	NA	6,19,25	Intestine,Pharynx	0,7	NA	NA	Q86UL3	GPAT4	Glycerol-3-phosphate acyltransferase 4	5.2e-133	424	48.821	Q8C0N2	Gpat3	Glycerol-3-phosphate acyltransferase 3	4.47e-134	430	48.14	Q6DG38	gpat3	Glycerol-3-phosphate acyltransferase 3	1.21e-134	442	46.833	Q9W1B5	CG3209-RA	CG3209, isoform C	4.5e-124	446	45.291	Q1ZXU8
dd_Smed_v6_2446_0_1	NA	NA	NA	1704	1.5689	6.60389	5.69e-07	1.32246	6.60389	3.27e-05	2.96678	2.50091	1.18628	darkblue	Contig1700	1.35695	8.49306	0.000204286	NA	9,18,20,24,27,30,33,37	Neural,Epidermal,Pharynx,Intestine	4	NA	NA	NA	NA	NA	NA	NA	NA	NA	NA	NA	NA	NA	NA	NA	NA	NA	NA	NA	NA	NA	NA	NA	NA	NA	NA	NA
dd_Smed_v6_2447_0_1	NA	TOM1L2	TOM1-like protein 2	1506	1.50361	4.81167	3.79e-06	1.57242	4.81167	1.46e-06	2.83551	2.97404	0.953422	dodgerblue	Contig6128	0.773827	6.84629	0.00332283	NA	NA	NA	4	NA	NA	Q6ZVM7	TOM1L2	TOM1-like protein 2	2.24e-65	352	35.795	Q5SRX1	Tom1l2	TOM1-like protein 2	2.55e-67	419	32.936	NA	NA	NA	NA	NA	NA	Q9XTL2	Stam	Jak pathway signal transduction adaptor molecule	5.87e-15	161	29.814	Q17796
dd_Smed_v6_245_0_1	NA	NA	NA	885	3.28009	8.68821	1.15e-26	3.18278	8.68821	2.58e-25	9.71414	9.08055	1.06977	darkblue	Contig7205	3.12968	11.5626	0.000623705	NA	6,10,15,17,19,22,28,30,39,41	Intestine,Cathepsin+ cell,Neoblast	4	phagocytes	Gut	NA	NA	NA	NA	NA	NA	NA	NA	NA	NA	NA	NA	NA	NA	NA	NA	NA	NA	NA	NA	NA	NA	NA	NA	NA
dd_Smed_v6_2464_0_1	NA	HSD17B12	Very-long-chain 3-oxoacyl-CoA reductase	1171	1.0396	7.03263	0.000320118	1.21929	7.03263	2.3e-05	2.05565	2.32833	0.882889	dodgerblue	Contig5996	-0.567329	7.85344	0.136482	NA	6,19	Intestine	NA	NA	NA	Q53GQ0	HSD17B12	Very-long-chain 3-oxoacyl-CoA reductase	2.43e-71	263	44.487	O70503	Hsd17b12	Very-long-chain 3-oxoacyl-CoA reductase	4.44e-66	264	41.288	Q4V9M6	hsd20b2	Si:ch211-284e13.2 protein	4.95e-61	314	38.854	Q9W3N1	spidey	CG1444	1.07e-65	310	42.258	Q09517
dd_Smed_v6_24642_0_1	NA	NA	NA	391	6.35092	1.74658	1.32e-08	6.56818	1.74658	6.07e-09	81.6239	94.8896	0.860199	dodgerblue	NA	NA	NA	NA	NA	NA	NA	NA	NA	NA	NA	NA	NA	NA	NA	NA	NA	NA	NA	NA	NA	NA	NA	NA	NA	NA	NA	NA	NA	NA	NA	NA	NA	NA	NA
dd_Smed_v6_2465_0_1	NA	ARL8B	ADP-ribosylation factor-like protein 8B	1031	1.33981	5.01105	1.3e-05	0.944631	5.01105	0.00321782	2.53119	1.9247	1.31511	darkblue	Contig3195	0.847521	9.04941	0.000249654	NA	28	Cathepsin+ cell	NA	NA	NA	Q9NVJ2	ARL8B	ADP-ribosylation factor-like protein 8B	7.9e-114	185	80	Q9CQW2	Arl8b	ADP-ribosylation factor-like protein 8B	8.69e-114	185	80	Q6P2U5	arf6a	ADP-ribosylation factor 6a	4.63e-38	172	37.209	Q9VHV5	Gie	ADP-ribosylation factor-like protein 8	7.03e-112	184	80.435	G5EDC6
dd_Smed_v6_2467_0_1	NA	TPD52	Tumor protein D52	670	1.16849	5.63683	0.000436385	0.854572	5.63683	0.0149147	2.24777	1.80822	1.24308	darkblue	Contig988	0.745813	7.19342	0.00115162	NA	NA	NA	NA	NA	NA	P55327	TPD52	Tumor protein D52	5.4e-11	102	35.294	Q62393	Tpd52	Tumor protein D52	1.16e-10	107	33.645	NA	NA	NA	NA	NA	NA	NA	NA	NA	NA	NA	NA	NA
dd_Smed_v6_2472_0_1	NA	DGAT1	Diacylglycerol O-acyltransferase 1	1943	3.25721	4.30246	3.52e-14	2.99748	4.30246	2.68e-12	9.56135	7.98604	1.19726	darkblue	PL03018A2H07	0.352012	7.16414	0.0789209	NA	NA	NA	NA	NA	NA	O75907	DGAT1	Diacylglycerol O-acyltransferase 1	1.68e-95	243	59.259	Q9Z2A7	Dgat1	Diacylglycerol O-acyltransferase 1	1.36e-126	474	44.515	Q6P3J0	dgat1a	O-acyltransferase	3.23e-114	468	45.94	Q960U8	mdy	O-acyltransferase	6.5e-111	511	40.313	Q17498
dd_Smed_v6_2480_0_1	NA	NAPB	Beta-soluble NSF attachment protein	1418	1.11105	6.25154	0.000240222	1.02805	6.25154	0.000848038	2.16003	2.03927	1.05922	darkblue	Contig3520	0.823311	7.769	0.000560456	NA	8,9,18,21	Neural	NA	NA	NA	Q9H115	NAPB	Beta-soluble NSF attachment protein	1.87e-91	267	50.562	Q9DB05	Napa	Alpha-soluble NSF attachment protein	2.72e-92	250	52.8	Q7T2F5	napab	N-ethylmaleimide sensitive fusion protein attachment protein alpha	5.59e-92	258	50.388	Q23983	alphaSnap	Alpha-soluble NSF attachment protein	6.38e-93	271	51.292	Q18921
dd_Smed_v6_2482_0_1	NA	TXNDC17	Thioredoxin domain-containing protein 17	716	1.18687	7.19009	8.27e-06	1.01078	7.19009	0.000196975	2.27659	2.01501	1.12982	darkblue	Contig1671	1.37543	9.64589	5.82e-05	NA	NA	NA	NA	NA	NA	Q9BRA2	TXNDC17	Thioredoxin domain-containing protein 17	1.11e-16	121	30.579	Q9CQM5	Txndc17	Thioredoxin domain-containing protein 17	6.17e-16	104	33.654	Q6DBT3	txndc17	Thioredoxin domain-containing protein 17	4.18e-14	121	29.752	Q9VMQ9	cl	Clot protein	9.4e-18	117	34.188	Q9BL27
dd_Smed_v6_2486_0_1	NA	RAB24	Ras-related protein Rab-24	914	1.86778	5.55737	3.99e-09	1.70063	5.55737	1.05e-07	3.64969	3.25043	1.12284	darkblue	NA	NA	NA	NA	NA	6,10,23,31	Intestine,Cathepsin+ cell,Neural	NA	NA	NA	Q969Q5	RAB24	Ras-related protein Rab-24	4.58e-58	200	46	P35290	Rab24	Ras-related protein Rab-24	2.85e-56	200	45.5	Q4KME1	rab24	RAB24, member RAS oncogene family	5.32e-60	204	46.569	Q7PLE9	Rab21	Rab21, isoform C	2.26e-29	168	35.119	P91857
dd_Smed_v6_2489_0_1	NA	TM2D1	TM2 domain-containing protein 1	580	1.08557	5.09563	0.000434659	0.718117	5.09563	0.0304769	2.12221	1.64503	1.29007	darkblue	Contig2414	0.327164	8.30863	0.0398681	NA	23	Neural	NA	NA	NA	Q9BX74	TM2D1	TM2 domain-containing protein 1	7.95e-11	162	41.358	Q99MB3	Tm2d1	TM2 domain-containing protein 1	1.45e-09	162	40.741	NA	NA	NA	NA	NA	NA	Q9W2H1	CG10795	TM2 domain-containing protein CG10795	7.31e-05	137	37.956	NA
dd_Smed_v6_2490_0_1	NA	UBB	Epididymis secretory protein Li 50	725	1.40733	5.51853	5.88e-06	1.26923	5.51853	5.52e-05	2.65245	2.41033	1.10045	darkblue	NA	NA	NA	NA	NA	NA	NA	NA	NA	NA	Q5U5U6	UBB	Epididymis secretory protein Li 50	7.51e-12	157	24.204	P0CG49	Ubb	Polyubiquitin-B	2.81e-10	153	24.183	Q6TLG3	ubb	Ubiquitin C	1.65e-10	153	24.183	Q8MT02	Ubi-p5E	GH17513p	2.48e-10	153	24.183	P49632
dd_Smed_v6_2494_0_1	NA	RAB43	Ras-related protein Rab-43	1578	2.12136	6.68698	1.08e-11	1.9796	6.68698	2.64e-10	4.35103	3.94383	1.10325	darkblue	Contig907	1.42256	9.15185	0.000635016	NA	30	Intestine	4	NA	NA	Q86YS6	RAB43	Ras-related protein Rab-43	8.58e-86	201	62.189	Q8CG50	Rab43	Ras-related protein Rab-43	4.45e-84	206	60.194	Q0P3V5	rab43	RAB43, member RAS oncogene family	5.53e-84	207	57.971	O18339	Rab19	RE48347p	6.57e-78	212	56.132	Q9U1W9
dd_Smed_v6_2495_0_1	NA	NA	NA	1072	2.64006	5.95039	1.74e-13	2.40667	5.95039	1.85e-11	6.23357	5.30248	1.1756	darkblue	Contig6009	2.25777	8.75052	0.000860213	NA	10,17,29,30,31	Cathepsin+ cell,Protonephridia,Intestine	4	NA	NA	NA	NA	NA	NA	NA	NA	NA	NA	NA	NA	NA	NA	NA	NA	NA	NA	NA	NA	NA	NA	NA	NA	NA	NA	NA
dd_Smed_v6_25_0_1	nid2	NID2	Nidogen-2	597	3.47063	12.5196	6.63e-17	6.47864	12.5196	2.98e-43	11.0857	89.1797	0.124307	darkorange	Contig2192	-0.838586	11.9592	0.0169822	goblet	32,41	Neural,Cathepsin+ cell	8	goblet cells	NA	Q14112	NID2	Nidogen-2	2.96e-10	123	31.707	O88322	Nid2	Nidogen-2	3.94e-09	117	29.915	A0A193GP06	tg	Thyroglobulin	5.19e-08	99	33.333	Q9VCR3	Cow	Proteoglycan Cow	0.000195	51	47.059	NA
dd_Smed_v6_2501_0_1	NA	COMMD4	COMM domain-containing protein 4	1121	2.07258	4.11844	1.42e-09	1.97871	4.11844	8.85e-09	4.20638	3.9414	1.06723	darkblue	Contig2611	1.35833	7.99172	0.000123934	NA	17,30	Cathepsin+ cell,Intestine	NA	NA	NA	Q9H0A8	COMMD4	COMM domain-containing protein 4	2.21e-26	211	30.806	Q9CQ02	Commd4	COMM domain-containing protein 4	1.43e-26	211	30.332	F1Q509	commd4	COMM domain-containing 4	2.54e-25	139	38.129	A8E6W0	CG34039-RA	IP19808p	1.78e-20	109	42.202	NA
dd_Smed_v6_2506_0_1	novel	NA	NA	276	5.55128	0.109681	0.00887504	6.62309	0.109681	0.00272796	46.8924	98.571	0.475722	darkorange	NA	NA	NA	NA	goblet	NA	NA	8	NA	NA	NA	NA	NA	NA	NA	NA	NA	NA	NA	NA	NA	NA	NA	NA	NA	NA	NA	NA	NA	NA	NA	NA	NA	NA	NA
dd_Smed_v6_2508_0_1	NA	KLHDC8A	Kelch domain-containing protein 8A	1142	0.881844	4.43252	0.0289321	1.07857	4.43252	0.00693229	1.84273	2.11194	0.872527	dodgerblue	Contig1709	-0.071945	7.30111	0.592741	NA	NA	NA	NA	NA	NA	Q8IYD2	KLHDC8A	Kelch domain-containing protein 8A	5e-45	318	27.358	Q91XA8	Klhdc8a	Kelch domain-containing protein 8A	1.94e-43	318	27.358	E9QDR3	klhdc8b	Kelch domain-containing 8B	2.98e-43	332	28.313	A1ZBE3	CG15097	Uncharacterized protein, isoform D	8.95e-19	274	29.197	Q8WQC4
dd_Smed_v6_2510_0_1	NA	AP3S2	AP-3 complex subunit sigma-2	789	2.32564	5.7736	1.64e-11	2.38171	5.7736	6.46e-12	5.01288	5.21153	0.961883	dodgerblue	Contig2102	1.84687	8.07552	0.000659003	NA	30	Intestine	4	NA	NA	P59780	AP3S2	AP-3 complex subunit sigma-2	1.46e-85	183	68.306	Q8BSZ2	Ap3s2	AP-3 complex subunit sigma-2	1.61e-85	183	68.306	Q6NSP1	ap1s1	Adaptor-related protein complex 1, sigma 1 subunit	4.15e-26	120	43.333	Q9W1E8	or	Adaptor protein complex AP-3 small chain sigma3	1.09e-89	182	72.527	O16369
dd_Smed_v6_2511_0_1	NA	NA	NA	1022	4.35557	5.18666	3.31e-28	4.27391	5.18666	2.49e-27	20.4718	19.3453	1.05823	darkblue	Contig174	2.45743	8.75586	3.93e-05	NA	30	Intestine	4	NA	NA	NA	NA	NA	NA	NA	NA	NA	NA	NA	NA	NA	NA	NA	NA	NA	NA	NA	NA	Q9VK03	CG43778	Uncharacterized protein, isoform D	4.2e-10	212	28.302	NA
dd_Smed_v6_2513_0_1	NA	SNX27	Sorting nexin-27	1805	1.68399	5.20717	1.09e-07	1.58911	5.20717	6.53e-07	3.21315	3.00864	1.06797	darkblue	Contig362	1.33691	8.38024	0.0001135	NA	8,9,10,13,17,20,21,24,27,29,30,37,40,41	Neural,Cathepsin+ cell,Muscle,Epidermal,Pharynx,Protonephridia,Intestine	4	NA	NA	Q96L92	SNX27	Sorting nexin-27	1.52e-108	485	40.206	Q3UHD6	Snx27	Sorting nexin-27	2.61e-111	485	40.825	Q6P3G2	snx27b	Sorting nexin family member 27	1.73e-105	485	39.588	Q9W486	CG32758	LD13361p	3.89e-118	488	42.828	Q93566
dd_Smed_v6_2519_0_1	NA	CCDC93	Coiled-coil domain-containing protein 93	2173	1.43628	5.51276	1.15e-06	1.47306	5.51276	6.82e-07	2.70623	2.7761	0.974831	dodgerblue	Contig1890	1.32969	7.99352	9.61e-05	NA	10,17,26,28,29,30,31,39,41	Cathepsin+ cell,Protonephridia,Intestine	4	phagocytes,aqp+ parenchymal cells,pigment,ldlrr-1+ parenchymal cells,psap+ parenchymal cells	Cathepsin+ b	Q567U6	CCDC93	Coiled-coil domain-containing protein 93	9.48e-98	622	33.119	Q7TQK5	Ccdc93	Coiled-coil domain-containing protein 93	1.46e-97	614	33.876	Q1RLV7	ccdc93	Coiled-coil domain containing 93	7.94e-98	615	33.659	A1ZAC7	fidipidine	Fidipidine	1.55e-69	597	28.978	H2KYD0
dd_Smed_v6_2523_0_1	NA	MELTF	Melanotransferrin	1660	1.71201	4.07911	6.35e-05	1.48743	4.07911	0.000648589	3.27617	2.80388	1.16844	darkblue	Contig6091	0.190257	6.73483	0.196404	NA	24,30,37	Epidermal,Intestine,Pharynx	4	NA	NA	P08582	MELTF	Melanotransferrin	6.92e-66	399	34.837	Q9R0R1	Meltf	Melanotransferrin	2.13e-63	399	33.333	Q0VIL3	otomp	Otolith matrix protein 1	3.2e-57	351	33.048	Q9VTZ5	Tsf2	LD22449p	6.92e-75	402	35.821	NA
dd_Smed_v6_253_0_1	NA	ATP6V0C	V-type proton ATPase 16 kDa proteolipid subunit	926	2.19484	10.1273	3.81e-13	2.05117	10.1273	1.29e-11	4.5784	4.14443	1.10471	darkblue	Contig429	2.93979	12.5909	2.29e-05	NA	8,9,10,17,18,20,21,28,30,41	Neural,Cathepsin+ cell,Intestine	4	phagocytes,ldlrr-1+ parenchymal cells,psap+ parenchymal cells	NA	P27449	ATP6V0C	V-type proton ATPase 16 kDa proteolipid subunit	2.75e-63	150	83.333	P63082	Atp6v0c	V-type proton ATPase 16 kDa proteolipid subunit	7.96e-65	150	84	F1QSP4	atp6v0ca	V-type proton ATPase proteolipid subunit	4.9e-66	153	82.353	P23380	Vha16-1	V-type proton ATPase 16 kDa proteolipid subunit	4.26e-61	152	80.263	P34546
dd_Smed_v6_2530_0_1	NA	SLC38A7	Putative sodium-coupled neutral amino acid transporter 7	2109	2.28921	6.21812	5.14e-14	2.23034	6.21812	2.48e-13	4.88789	4.69244	1.04165	darkblue	Contig2706	0.432974	7.23575	0.0238866	NA	10,17,19,28,39	Cathepsin+ cell,Intestine	7	NA	NA	Q9NVC3	SLC38A7	Putative sodium-coupled neutral amino acid transporter 7	2.43e-37	356	29.213	Q5HZH7	Slc38a8	Putative sodium-coupled neutral amino acid transporter 8	5.16e-37	413	29.54	Q6DEL1	slc38a7	Putative sodium-coupled neutral amino acid transporter 7	4.04e-38	448	27.009	Q7KTI1	CG13384	Uncharacterized protein, isoform D	2.08e-06	244	24.59	NA
dd_Smed_v6_2531_0_1	NA	BLOC1S1	Biogenesis of lysosome-related organelles complex 1 subunit 1	454	1.96949	4.29639	2.84e-05	1.80081	4.29639	0.000153864	3.9163	3.48415	1.12403	darkblue	Contig7275	0.756947	8.17487	0.00929282	NA	NA	NA	NA	NA	NA	P78537	BLOC1S1	Biogenesis of lysosome-related organelles complex 1 subunit 1	3.38e-24	115	44.348	O55102	Bloc1s1	Biogenesis of lysosome-related organelles complex 1 subunit 1	2.83e-24	115	44.348	Q1LXG2	bloc1s1	Biogenesis of lysosomal organelles complex-1, subunit 1	1.13e-22	115	42.609	A1Z9S1	Blos1	Biogenesis of lysosome-related organelles complex 1 subunit 1	4.11e-27	115	47.826	Q22616
dd_Smed_v6_2533_0_1	NA	DIAPH2	Protein diaphanous homolog 2	3462	1.13205	5.89127	2.55e-05	0.9221	5.89127	0.000846454	2.1917	1.89487	1.15665	darkblue	NA	NA	NA	NA	NA	17,24,27,29,30,31,37	Cathepsin+ cell,Epidermal,Pharynx,Protonephridia,Intestine	4	NA	NA	O60879	DIAPH2	Protein diaphanous homolog 2	5.17e-83	472	37.5	O70566	Diaph2	Protein diaphanous homolog 2	3.87e-83	472	38.347	F1RCU7	diaph2	Diaphanous-related formin 2	1.56e-74	473	33.615	P48608	dia	Protein diaphanous	4.14e-68	473	33.192	Q7JP75
dd_Smed_v6_2534_0_1	NA	AP3D1	AP-3 complex subunit delta-1	3872	1.76489	8.41573	1.83e-10	1.71815	8.41573	6.57e-10	3.39849	3.29015	1.03293	darkblue	Contig3354	1.50402	8.87017	4.78e-05	NA	20,30	Neural,Intestine	4,7	otf+ cells 1,phagocytes	NA	O14617	AP3D1	AP-3 complex subunit delta-1	0	769	63.069	O54774	Ap3d1	AP-3 complex subunit delta-1	0	769	62.679	Q7ZUU8	ap1g1	Adaptor-related protein complex 1, gamma 1 subunit	2.11e-38	478	24.477	P54362	g	AP-3 complex subunit delta	0	880	53.75	Q8WQB3
dd_Smed_v6_2535_0_1	NA	NA	NA	1501	1.21473	4.48623	0.00105611	1.13126	4.48623	0.00282921	2.32097	2.1905	1.05956	darkblue	NA	NA	NA	NA	NA	4,10,15,17,39,41	Cathepsin+ cell	NA	NA	Cathepsin+ b	NA	NA	NA	NA	NA	NA	NA	NA	NA	NA	NA	NA	NA	NA	NA	NA	NA	NA	NA	NA	NA	NA	NA	NA	NA
dd_Smed_v6_2538_0_1	NA	PRKAA2	5'-AMP-activated protein kinase catalytic subunit alpha-2	2034	1.42273	4.3881	7.05e-05	1.22873	4.3881	0.000781646	2.68092	2.3436	1.14393	darkblue	Contig5913	0.00747071	7.61022	0.976683	NA	21	Neural	NA	NA	NA	P54646	PRKAA2	5'-AMP-activated protein kinase catalytic subunit alpha-2	0	557	57.271	Q8BRK8	Prkaa2	5'-AMP-activated protein kinase catalytic subunit alpha-2	0	558	57.527	A5WUM0	prkaa1	Non-specific serine/threonine protein kinase	0	588	53.741	O18645	AMPKalpha	Non-specific serine/threonine protein kinase	0	573	58.29	Q95ZQ4
dd_Smed_v6_25388_0_1	NA	NA	NA	254	4.24025	1.3029	9.85e-05	3.81751	1.3029	0.000470987	18.8991	14.0989	1.34046	darkblue	NA	NA	NA	NA	NA	NA	NA	NA	NA	NA	NA	NA	NA	NA	NA	NA	NA	NA	NA	NA	NA	NA	NA	NA	NA	NA	NA	NA	NA	NA	NA	NA	NA	NA	NA
dd_Smed_v6_254_0_1	cg7631	BMP1	Bone morphogenetic protein 1	1062	8.08676	10.5913	8.87e-53	4.38894	10.5913	3.99e-22	271.868	20.9509	12.9765	darkgreen	Contig354	-0.795176	10.2738	0.00591887	goblet	30	Intestine	8	NA	NA	P13497	BMP1	Bone morphogenetic protein 1	1.67e-22	204	30.882	P28825	Mep1a	Meprin A subunit alpha	8.5e-25	215	31.628	O57460	tll1	Dorsal-ventral patterning tolloid-like protein 1	2.89e-25	218	30.734	Q9V3R0	CG7631	Metalloendopeptidase	2.59e-28	210	32.857	Q9U3S9
dd_Smed_v6_2549_0_1	NA	RUFY1	RUN and FYVE domain-containing protein 1	2214	1.73147	6.26542	8.92e-11	1.62817	6.26542	1.34e-09	3.32066	3.09121	1.07422	darkblue	Contig2383	1.99516	8.59197	3.25e-05	NA	10,17	Cathepsin+ cell	NA	NA	NA	Q96T51	RUFY1	RUN and FYVE domain-containing protein 1	1.11e-80	615	32.033	Q8BIJ7	Rufy1	RUN and FYVE domain-containing protein 1	1.71e-83	615	31.87	B8A5E3	rufy2	RUN and FYVE domain-containing 2	5.55e-89	619	33.279	Q8IMP2	CG31064-RB	LD28220p	3.61e-59	640	29.063	G5ED80
dd_Smed_v6_2552_0_1	NA	NA	NA	1172	1.10726	5.97611	0.000362894	1.00924	5.97611	0.00146529	2.15436	2.01285	1.0703	darkblue	Contig3163	0.906022	8.79046	0.00116907	NA	24,27,30,37	Epidermal,Pharynx,Intestine	4	NA	NA	NA	NA	NA	NA	NA	NA	NA	NA	NA	NA	NA	NA	NA	NA	NA	NA	NA	NA	Q9VPR7	cold	Coiled, isoform A	7.01e-19	113	37.168	NA
dd_Smed_v6_2559_0_1	NA	C10orf11	Leucine-rich repeat-containing protein C10orf11	981	7.63212	4.48885	1.16e-28	7.73817	4.48885	3.44e-29	198.38	213.512	0.929128	dodgerblue	Contig2265	2.91512	9.08794	5.34e-05	NA	30	Intestine	4	NA	NA	Q9H2I8	C10orf11	Leucine-rich repeat-containing protein C10orf11	8.34e-14	113	39.823	Q9D9B4	-	Leucine-rich repeat-containing protein C10orf11 homolog	1.58e-15	125	40	Q501Y0	c13h10orf11	C10orf11 homolog (H. sapiens)	1.29e-14	135	35.556	Q8INA6	CG31274	LP05795p	3.6e-16	136	36.029	NA
dd_Smed_v6_25604_0_1	NA	NA	NA	209	3.20924	0.754184	0.00788991	1.73613	0.754184	0.188018	9.24862	3.3314	2.7762	darkgreen	NA	NA	NA	NA	NA	NA	NA	NA	NA	NA	NA	NA	NA	NA	NA	NA	Q7M732	Rtl1	Retrotransposon-like protein 1	0.000264	61	29.508	NA	NA	NA	NA	NA	NA	Q8I7P9	pol	Retrovirus-related Pol polyprotein from transposon opus	2.13e-06	45	40	NA
dd_Smed_v6_2563_0_1	NA	TWF1	Twinfilin-1	1284	1.60051	6.51274	3.71e-08	1.23788	6.51274	2.92e-05	3.03251	2.35851	1.28577	darkblue	Contig2453	1.77179	8.78461	7.25e-05	NA	20,29,30	Neural,Protonephridia,Intestine	4	NA	NA	Q12792	TWF1	Twinfilin-1	4.51e-77	320	37.188	Q91YR1	Twf1	Twinfilin-1	5.83e-77	320	37.188	Q6TH32	cfl1	Cofilin 1	5.4e-06	56	37.5	Q9VFM9	twf	Twinfilin	1.29e-72	325	37.846	NA
dd_Smed_v6_2564_0_1	NA	NA	NA	628	3.09683	6.75825	2.56e-29	3.04198	6.75825	2.14e-28	8.55536	8.23618	1.03875	darkblue	Contig6474	1.19893	7.55047	0.00381664	NA	6,15,17,28,30,31,41	Intestine,Cathepsin+ cell	NA	NA	NA	NA	NA	NA	NA	NA	NA	NA	NA	NA	NA	NA	NA	NA	NA	NA	NA	NA	NA	NA	NA	NA	NA	NA	NA	NA
dd_Smed_v6_2567_0_1	NA	SOAT1	Sterol O-acyltransferase 1	1733	3.67978	6.30521	4.12e-34	3.11689	6.30521	8.34e-26	12.8152	8.67516	1.47723	darkblue	Contig1658	0.716832	8.02291	0.00226233	NA	6,10,19,28,30	Intestine,Cathepsin+ cell	0,7	NA	NA	P35610	SOAT1	Sterol O-acyltransferase 1	5.75e-90	463	35.205	Q61263	Soat1	Sterol O-acyltransferase 1	4.46e-88	463	34.557	B0UYE4	soat1	O-acyltransferase	9.07e-83	468	33.547	Q8MYW9	CG8112	O-acyltransferase	2.04e-53	494	29.352	Q17498
dd_Smed_v6_257_0_1	lipf	LIPF	Gastric triacylglycerol lipase	1422	4.99268	10.6471	3.26e-47	3.31431	10.6471	1.29e-24	31.8381	9.94737	3.20066	darkgreen	Contig6353	-1.16042	11.0951	0.000876411	goblet	10,39	Cathepsin+ cell	5,8	goblet cells	NA	P07098	LIPF	Gastric triacylglycerol lipase	5.69e-117	400	45.75	Q8BM14	Lipk	Lipase member K	1.08e-110	375	46.4	Q7ZTR9	lipf	Lipase	3.61e-119	374	47.326	Q9VKS5	CG17099	RE24765p	7.45e-83	365	38.63	Q93789
dd_Smed_v6_2572_0_1	NA	VPS28	Vacuolar protein sorting-associated protein 28 homolog	901	0.761828	6.03532	0.0261186	1.09774	6.03532	0.000921677	1.69564	2.14019	0.792285	dodgerblue	Contig5241	1.01912	8.56314	0.000730948	NA	NA	NA	NA	NA	Cathepsin+ b	Q9UK41	VPS28	Vacuolar protein sorting-associated protein 28 homolog	1.81e-98	215	63.721	Q9D1C8	Vps28	Vacuolar protein sorting-associated protein 28 homolog	2.13e-97	213	63.38	Q6PH25	vps28	Vacuolar protein sorting-associated protein 28 homolog	3.72e-95	206	65.049	Q9V359	Vps28	Vacuolar protein sorting-associated protein 28 homolog	5.41e-98	205	65.366	Q9NA26
dd_Smed_v6_2579_0_1	NA	DNAJC13	DnaJ homolog subfamily C member 13	7622	2.13371	7.71201	5.64e-14	2.02044	7.71201	1.22e-12	4.38846	4.05707	1.08168	darkblue	Contig6495	1.81275	8.57436	0.000716297	NA	10,15,17,23,28,30,33,39	Cathepsin+ cell,Neural,Intestine	4	phagocytes	Gut	O75165	DNAJC13	DnaJ homolog subfamily C member 13	0	1426	48.457	D4AFX7	Dnajc13	DnaJ heat shock protein family (Hsp40) member C13	0	1417	48.412	B0S5B7	dnaja3b	DnaJ (Hsp40) homolog, subfamily A, member 3B	3.24e-05	49	46.939	A0A0B4LFW6	Rme-8	Receptor mediated endocytosis 8, isoform B	0	883	43.375	O62178
dd_Smed_v6_2581_0_1	NA	ZNFX1	NFX1-type zinc finger-containing protein 1	5633	1.15378	5.53225	0.00196962	0.664948	5.53225	0.11015	2.22496	1.58551	1.40331	darkblue	NA	NA	NA	NA	NA	13,21	Muscle,Neural	NA	NA	NA	Q9P2E3	ZNFX1	NFX1-type zinc finger-containing protein 1	0	1618	37.206	Q8R151	Znfx1	NFX1-type zinc finger-containing protein 1	0	1617	38.157	Q7ZVZ4	upf1	UPF1 regulator of nonsense transcripts homolog (Yeast)	3.96e-25	346	28.613	Q9VYS3	Upf1	Regulator of nonsense transcripts 1 homolog	2.2e-26	315	31.111	O76512
dd_Smed_v6_2582_1_1	NA	METTL27	Methyltransferase-like protein 27	764	5.59679	5.7227	4.67e-47	5.18521	5.7227	6.84e-42	48.395	36.3835	1.33013	darkblue	Contig4678	2.16647	8.77858	2.92e-05	NA	30	Intestine	4	NA	NA	Q8N6F8	METTL27	Methyltransferase-like protein 27	1.4e-13	193	25.907	NA	NA	NA	NA	NA	NA	NA	NA	NA	NA	NA	NA	NA	NA	NA	NA	NA	NA	NA
dd_Smed_v6_2583_0_1	NA	DNM3	Dynamin-3	2729	1.33479	5.70512	1.47e-05	1.18911	5.70512	0.000143327	2.52239	2.28011	1.10626	darkblue	Contig3030	0.437325	6.52658	0.0084686	NA	17,29	Cathepsin+ cell,Protonephridia	4	NA	Cathepsin+ b	Q9UQ16	DNM3	Dynamin-3	0	808	58.045	Q8BZ98	Dnm3	Dynamin-3	0	805	58.509	F8W429	dnm1a	Dynamin 1a	0	760	59.211	P27619	shi	Dynamin	0	803	54.919	P39055
dd_Smed_v6_2584_0_1	NA	NA	NA	621	2.25232	3.81126	0.000788072	2.46594	3.81126	0.000268461	4.76448	5.52486	0.862371	dodgerblue	Contig3274	0.752069	6.27394	0.00266575	NA	37,38	Pharynx,Parapharyngeal	NA	NA	NA	NA	NA	NA	NA	NA	NA	NA	NA	NA	NA	NA	NA	NA	NA	NA	NA	NA	NA	NA	NA	NA	NA	NA	NA	NA
dd_Smed_v6_2591_0_1	NA	MRC1	Macrophage mannose receptor 1	1713	3.32693	4.21504	7.6e-09	2.46537	4.21504	1.67e-05	10.0347	5.52268	1.81701	green	Contig1679	-0.301724	7.59084	0.294281	NA	NA	NA	5	NA	NA	P22897	MRC1	Macrophage mannose receptor 1	4.57e-22	554	21.841	Q64449	Mrc2	C-type mannose receptor 2	8.05e-22	562	21.174	F1QYF2	mrc1b	Mannose receptor, C type 1b	2.55e-24	549	23.679	Q9W0I2	tfc	RE15268p	6.28e-07	145	26.897	P91429
dd_Smed_v6_2596_0_1	NA	SLC36A1	Proton-coupled amino acid transporter 1	973	2.76917	6.49283	1.71e-23	2.63469	6.49283	1.71e-21	6.81718	6.2104	1.0977	darkblue	Contig7529	2.00203	9.34262	0.000849642	NA	17,30	Cathepsin+ cell,Intestine	4	NA	NA	Q7Z2H8	SLC36A1	Proton-coupled amino acid transporter 1	1.35e-32	240	35	Q8K4D3	Slc36a1	Proton-coupled amino acid transporter 1	1.05e-29	236	34.322	E7F5P8	slc36a1	Solute carrier family 36 (protomino acid symporter), member 1	3.63e-29	248	34.274	Q7KTI1	CG13384	Uncharacterized protein, isoform D	1.69e-42	245	34.694	G4SQY7
dd_Smed_v6_2599_0_1	NA	TRAF5	TNF receptor-associated factor 5	1580	3.49252	5.72689	4.11e-31	3.36866	5.72689	2.92e-29	11.2552	10.3292	1.08964	darkblue	Contig1736	2.61056	8.5035	3.74e-05	NA	10,30	Cathepsin+ cell,Intestine	4	NA	NA	O00463	TRAF5	TNF receptor-associated factor 5	1.24e-10	287	25.087	P39429	Traf2	TNF receptor-associated factor 2	3.8e-11	146	27.397	Q6DEG0	traf3	TNF receptor-associated factor 3	4.18e-08	144	20.139	Q9XYQ9	Traf6	TNF-receptor-associated factor 2	2.96e-05	108	25.926	G5EG80
dd_Smed_v6_260_0_1	tsr	CFL1	Cofilin-1	730	2.62977	9.54785	1.37e-16	2.52069	9.54785	2.25e-15	6.18928	5.73858	1.07854	darkblue	Contig513	3.26615	11.2075	2.37e-05	uniform	4,6,10,15,17,19,24,27,28,29,30,37,39	Cathepsin+ cell,Intestine,Epidermal,Pharynx,Protonephridia	4,7	phagocytes,aqp+ parenchymal cells,ldlrr-1+ parenchymal cells	Gut	P23528	CFL1	Cofilin-1	6.48e-10	144	28.472	P18760	Cfl1	Cofilin-1	1.58e-09	144	29.167	Q6TH32	cfl1	Cofilin 1	9.15e-09	142	26.761	P45594	tsr	Cofilin/actin-depolymerizing factor homolog	1.86e-22	132	36.364	Q07749
dd_Smed_v6_2603_0_1	NA	RAB1B	Ras-related protein Rab-1B	880	5.37555	6.148	3.74e-35	5.11641	6.148	1.28e-32	41.5146	34.689	1.19677	darkblue	Contig6579	2.73832	9.11655	0.000657798	NA	30	Intestine	4	NA	NA	Q9H0U4	RAB1B	Ras-related protein Rab-1B	1.73e-28	197	31.98	Q9D1G1	Rab1b	Ras-related protein Rab-1B	3.75e-29	197	32.487	B8JLC8	rab1aa	RAB1A, member RAS oncogene family a	7.7e-29	172	36.047	O18339	Rab19	RE48347p	2.74e-29	125	48	Q9XWZ3
dd_Smed_v6_2604_0_1	NA	NA	NA	4354	5.37109	6.58527	1.63e-62	5.37149	6.58527	2.77e-62	41.3865	41.3982	0.999718	dodgerblue	Contig5144	0.451702	6.98063	0.0265092	NA	6,27,30	Intestine,Pharynx	4,7	phagocytes	NA	NA	NA	NA	NA	NA	NA	NA	NA	NA	NA	NA	NA	NA	NA	NA	NA	NA	NA	NA	NA	NA	NA	NA	NA	NA
dd_Smed_v6_2615_1_1	NA	NA	NA	939	5.64158	2.98024	1.28e-16	5.44083	2.98024	1.1e-15	49.9211	43.4362	1.1493	darkblue	Contig3882	1.88456	8.01015	4.05e-05	NA	30	Intestine	4	NA	NA	NA	NA	NA	NA	NA	NA	NA	NA	NA	NA	NA	NA	NA	NA	NA	NA	NA	NA	NA	NA	NA	NA	NA	NA	NA
dd_Smed_v6_2622_0_1	NA	CNTNAP2	Contactin-associated protein-like 2	4304	1.10548	5.87867	8.59e-05	1.06208	5.87867	0.000193427	2.15171	2.08794	1.03054	darkblue	Contig5205	0.80835	7.95131	0.00038126	NA	11,20,24,33,40	Epidermal,Neural,Protonephridia	4	NA	NA	Q9UHC6	CNTNAP2	Contactin-associated protein-like 2	2.76e-164	1356	30.531	Q9CPW0	Cntnap2	Contactin-associated protein-like 2	1.56e-163	1357	30.508	A1XQX0	nrxn1a	Neurexin-1a	5.64e-23	349	26.934	Q94887	Nrx-IV	Neurexin-4	0	1200	33.333	Q18291
dd_Smed_v6_2623_0_1	NA	NA	NA	596	1.41139	6.34392	1.48e-06	1.20247	6.34392	5.48e-05	2.65993	2.30133	1.15582	darkblue	Contig787	1.33958	8.35593	0.000186362	NA	10,17,28,30	Cathepsin+ cell,Intestine	4	NA	NA	NA	NA	NA	NA	NA	NA	NA	NA	NA	NA	NA	NA	NA	NA	NA	NA	NA	NA	Q9VJD2	CG5110	Ragulator complex protein LAMTOR3 homolog	1.36e-12	108	33.333	NA
dd_Smed_v6_2630_0_1	NA	NA	NA	2200	1.14357	7.1289	2.11e-05	0.957444	7.1289	0.000506687	2.20927	1.94187	1.1377	darkblue	Contig639	0.701396	7.01418	0.419449	NA	23,24,25,27,29,30,33,37,40	Neural,Epidermal,Pharynx,Protonephridia,Intestine	4	epidermis,pharynx cell type,protonephridia,phagocytes,ldlrr-1+ parenchymal cells,gut progenitors	NA	NA	NA	NA	NA	NA	NA	NA	NA	NA	NA	NA	NA	NA	NA	NA	NA	NA	NA	NA	NA	NA	NA	NA	NA	NA
dd_Smed_v6_2631_0_1	NA	UBE2K	Ubiquitin-conjugating enzyme E2 K	1173	1.25406	5.41938	0.000142345	1.15962	5.41938	0.000545403	2.38512	2.23399	1.06765	darkblue	PL04006A2A10	0.827201	9.42983	0.00373759	NA	NA	NA	NA	NA	NA	P61086	UBE2K	Ubiquitin-conjugating enzyme E2 K	1.25e-74	198	57.576	P61087	Ube2k	Ubiquitin-conjugating enzyme E2 K	1.38e-74	198	57.576	Q5PR60	ube2kb	Ube2k protein	2.32e-75	198	58.081	P52486	Ubc4	Ubiquitin-conjugating enzyme E2-22 kDa	2.94e-81	198	61.111	Q9TZ69
dd_Smed_v6_2636_0_1	NA	ARPP19	cAMP-regulated phosphoprotein 19	975	1.7722	4.17708	7.35e-05	1.98757	4.17708	9.52e-06	3.41574	3.96568	0.861325	dodgerblue	Contig233	1.73565	9.34504	0.000213517	NA	17	Cathepsin+ cell	NA	NA	NA	P56211	ARPP19	cAMP-regulated phosphoprotein 19	3.65e-08	55	47.273	P56212	Arpp19	cAMP-regulated phosphoprotein 19	1.89e-07	55	45.455	Q6PFV1	arpp19a	CAMP-regulated phosphoprotein 19a	7e-09	51	50.98	Q9VUB8	endos	Endosulfine, isoform A	1.4e-05	46	45.652	NA
dd_Smed_v6_2643_0_1	NA	NA	NA	1660	4.08474	5.41591	9.11e-34	3.92139	5.41591	1.48e-31	16.9679	15.1515	1.11989	darkblue	Contig3574	2.84557	9.5317	3.02e-05	NA	10,17,30,39,41	Cathepsin+ cell,Intestine	4	NA	NA	NA	NA	NA	NA	NA	NA	Q8BX37	Acp7	Acid phosphatase type 7	3.3e-120	405	45.926	NA	NA	NA	NA	NA	NA	X2JB52	CG1637	Purple acid phosphatase	4.71e-134	424	48.821	NA
dd_Smed_v6_2650_0_1	NA	AP1M1	AP-1 complex subunit mu-1	1770	1.17619	5.10954	7.37e-05	1.05412	5.10954	0.000490548	2.25979	2.07646	1.08829	darkblue	Contig6283	0.00859272	6.98388	0.885428	NA	20,23	Neural	NA	NA	NA	Q9BXS5	AP1M1	AP-1 complex subunit mu-1	0	422	79.147	P35585	Ap1m1	AP-1 complex subunit mu-1	0	422	78.436	A0A0R4IRS1	ap1m1	Adaptor-related protein complex 1, mu 1 subunit	0	422	79.147	O62531	AP-1mu	Adaptor protein complex 1, mu subunit	0	425	78.118	P35602
dd_Smed_v6_2652_0_1	NA	VPS35	Vacuolar protein sorting-associated protein 35	2660	1.36169	6.88749	1.85e-06	1.21386	6.88749	2.72e-05	2.56986	2.31957	1.1079	darkblue	NA	NA	NA	NA	NA	8,10,17,21,30	Neural,Cathepsin+ cell,Intestine	4	NA	NA	Q96QK1	VPS35	Vacuolar protein sorting-associated protein 35	0	800	52.875	Q9EQH3	Vps35	Vacuolar protein sorting-associated protein 35	0	800	52.875	NA	NA	NA	NA	NA	NA	Q9W277	Vps35	Vacuolar protein sorting-associated protein 35	0	797	47.051	Q21053
dd_Smed_v6_2654_0_1	NA	PCDH1	Protocadherin-1	3727	1.28698	5.94203	1.15e-05	1.18374	5.94203	6.82e-05	2.44017	2.27165	1.07418	darkblue	PL05003B2E03	1.52893	8.02731	0.000392681	NA	2,10,11,17,30,39	Epidermal,Cathepsin+ cell,Intestine	4	NA	NA	Q08174	PCDH1	Protocadherin-1	2.31e-75	738	29.81	Q8QZT6	Pcdh1	Pcdh1 protein	4.62e-75	739	30.041	A0A0B5JFG8	pcdh18a	Pcdh18a	4.67e-63	663	29.412	P33450	ft	Cadherin-related tumor suppressor	1.29e-62	726	29.201	G5EDK5
dd_Smed_v6_2663_0_1	NA	ACADVL	Very long-chain specific acyl-CoA dehydrogenase, mitochondrial	1948	1.97233	2.47267	0.000585289	2.28393	2.47267	7.21e-05	3.92402	4.87002	0.805751	dodgerblue	Contig3168	0.666989	9.06668	0.0061701	NA	6	Intestine	7	NA	NA	P49748	ACADVL	Very long-chain specific acyl-CoA dehydrogenase, mitochondrial	0	600	53	P50544	Acadvl	Very long-chain specific acyl-CoA dehydrogenase, mitochondrial	0	610	50.656	Q7T2C2	acadvl	Acyl-Coenzyme A dehydrogenase, very long chain	0	592	52.027	Q9VDT1	Arc42	Arc42	8.39e-65	369	35.23	Q22347
dd_Smed_v6_2667_0_1	NA	ARL8B	ADP-ribosylation factor-like protein 8B	4457	1.35062	6.49693	1.59e-06	1.24677	6.49693	1.18e-05	2.55021	2.37309	1.07464	darkblue	Contig1889	0.293774	7.22693	0.0767667	NA	17	Cathepsin+ cell	NA	NA	NA	Q9NVJ2	ARL8B	ADP-ribosylation factor-like protein 8B	2.76e-87	185	67.568	Q9CQW2	Arl8b	ADP-ribosylation factor-like protein 8B	3.04e-87	185	67.568	Q6P2U5	arf6a	ADP-ribosylation factor 6a	1.39e-31	171	35.088	Q9VHV5	Gie	ADP-ribosylation factor-like protein 8	1.51e-85	182	68.681	G5EDC6
dd_Smed_v6_2669_0_1	NA	TRAF3	TNF receptor-associated factor 3	1442	2.31387	5.26936	1.64e-16	2.29654	5.26936	3.03e-16	4.97214	4.91278	1.01208	darkblue	Contig3390	1.96811	7.73085	4.14e-05	NA	10,30,41	Cathepsin+ cell,Intestine	4	NA	NA	Q13114	TRAF3	TNF receptor-associated factor 3	4.51e-32	389	27.249	P70191	Traf5	TNF receptor-associated factor 5	1.6e-31	381	27.297	Q6DEG0	traf3	TNF receptor-associated factor 3	1.84e-29	379	26.385	A8DYU9	Traf4	TNF-receptor-associated factor 4, isoform E	6.53e-18	172	30.814	G5EG80
dd_Smed_v6_267_0_1	ctsla	CTSV	Cathepsin L2	1208	5.77641	10.5503	2.34e-36	5.70338	10.5503	1.14e-35	54.8114	52.106	1.05192	darkblue	Contig139	5.14684	13.4423	2.29e-05	uniform subset	30	Intestine	4	phagocytes	Gut	O60911	CTSV	Cathepsin L2	1.28e-118	338	52.071	P06797	Ctsl	Cathepsin L1	1.81e-111	319	52.978	A5WVL6	ctsla	Cathepsin La	1.36e-122	336	53.571	Q95029	Cp1	Cathepsin L	8.59e-115	316	53.165	O45734
dd_Smed_v6_2670_0_1	med21	MED21	Mediator of RNA polymerase II transcription subunit 21	1395	1.03495	6.70246	0.00028951	0.934218	6.70246	0.00137449	2.04904	1.91085	1.07232	darkblue	Contig2568	1.28365	8.9068	0.000446423	uniform low	NA	NA	NA	NA	NA	Q13503	MED21	Mediator of RNA polymerase II transcription subunit 21	2.53e-12	139	29.496	Q9CQ39	Med21	Mediator of RNA polymerase II transcription subunit 21	1.09e-12	139	30.216	Q7ZTI5	med21	Mediator of RNA polymerase II transcription subunit 21	3.03e-14	139	30.216	Q9W5P1	MED21	Mediator of RNA polymerase II transcription subunit 21	4.1e-17	139	35.971	Q6BER6
dd_Smed_v6_2672_0_1	NA	TTN	Titin	4027	1.5598	6.88637	7.96e-08	1.38434	6.88637	2.43e-06	2.94812	2.61052	1.12932	darkblue	Contig6933	1.53934	7.49167	0.00106684	NA	10,15,17,28,30,31,39,41,42	Cathepsin+ cell,Intestine	4,7	aqp+ parenchymal cells	Cathepsin+ b	Q8WZ42	TTN	Titin	3.5e-06	170	27.059	P58801	Ripk2	Receptor-interacting serine/threonine-protein kinase 2	2.07e-05	117	28.205	F1QZQ0	ttn.2	Titin, tandem duplicate 2	0.000238	124	27.419	O97143	SAK	Serine/threonine-protein kinase PLK4	0.000442	125	26.4	X5M5N0
dd_Smed_v6_2673_0_1	NA	CNTN2	Contactin-2	4186	1.37556	5.97725	1.97e-06	1.13583	5.97725	0.000116838	2.59468	2.19744	1.18077	darkblue	Contig3005	0.914788	8.1574	0.000340812	NA	17,20,21,23,24,26,27,30,33,37,40	Cathepsin+ cell,Neural,Epidermal,Protonephridia,Pharynx,Intestine	4,7	NA	NA	Q02246	CNTN2	Contactin-2	6.1e-88	1013	26.752	P12960	Cntn1	Contactin-1	7.88e-86	1079	27.34	A0A0B5JWD6	cntn2	Cntn2	2.05e-79	1023	25.806	Q9VN14	Cont	Contactin	1.95e-118	1313	28.408	G5ECX2
dd_Smed_v6_2681_0_1	NA	-	cDNA FLJ46199 fis, clone TESTI4007965, highly similar to AP-1 complex subunit gamma-1	3510	1.16414	7.31784	1.78e-05	0.863199	7.31784	0.00221088	2.24099	1.81907	1.23194	darkblue	Contig6798	1.18742	9.15729	0.00191015	NA	20	Neural	NA	NA	NA	B3KXW5	-	cDNA FLJ46199 fis, clone TESTI4007965, highly similar to AP-1 complex subunit gamma-1	0	884	53.167	P22892	Ap1g1	AP-1 complex subunit gamma-1	0	876	53.196	A0A0R4IJN1	ap1g1	Adaptor-related protein complex 1, gamma 1 subunit	0	886	52.257	Q86B59	AP-1gamma	Adaptor protein complex 1, gamma subunit, isoform C	0	691	56.874	Q8WQB3
dd_Smed_v6_2685_0_1	NA	GLMP	Glycosylated lysosomal membrane protein	1632	2.94191	6.54547	2.38e-19	2.74659	6.54547	3.6e-17	7.68429	6.7113	1.14498	darkblue	Contig3909	1.7078	7.93546	9.69e-05	NA	10,17,28,30	Cathepsin+ cell,Intestine	4	NA	NA	Q8WWB7	GLMP	Glycosylated lysosomal membrane protein	5.35e-15	360	24.167	Q9JHJ3	Glmp	Glycosylated lysosomal membrane protein	2.41e-16	433	22.864	Q66HW4	glmp	Glycosylated lysosomal membrane protein	3.99e-25	408	28.186	NA	NA	NA	NA	NA	NA	NA
dd_Smed_v6_2690_0_1	plb1	PLB1	Phospholipase B1, membrane-associated	1619	7.46295	6.38098	2.45e-35	7.24951	6.38098	6.14e-34	176.43	152.167	1.15945	darkblue	Contig3451	3.2808	9.69528	3.32e-05	uniform subset	30	Intestine	4	NA	NA	Q6P1J6	PLB1	Phospholipase B1, membrane-associated	1.78e-63	329	39.818	Q3TTY0	Plb1	Phospholipase B1, membrane-associated	1.62e-66	344	38.953	NA	NA	NA	NA	NA	NA	Q9VW80	Dmel\CG7365	CG7365, isoform A	1.51e-49	324	33.025	NA
dd_Smed_v6_2696_0_1	NA	ADIPOR2	Adiponectin receptor protein 2	1510	1.12461	6.6151	5.21e-05	1.02237	6.6151	0.000298626	2.18043	2.03126	1.07344	darkblue	Contig5712	1.92431	10.2766	8.4e-05	NA	19,24,27	Intestine,Epidermal,Pharynx	NA	NA	NA	Q86V24	ADIPOR2	Adiponectin receptor protein 2	7.92e-106	355	48.451	Q8BQS5	Adipor2	Adiponectin receptor protein 2	1.19e-105	312	52.885	Q5TYU5	adipor2	Adiponectin receptor 2	1.11e-97	302	53.311	Q9VCY8	AdipoR	Adiponectin receptor protein	7.13e-114	299	56.856	Q94177
dd_Smed_v6_2698_0_1	NA	TSPAN3	Tetraspanin-3	1238	2.83134	6.1447	8.22e-22	2.32874	6.1447	1.78e-15	7.11736	5.02366	1.41677	darkblue	Contig3563	-0.848208	7.6966	0.000401118	NA	19,22,25,27,37,40	Intestine,Neoblast,Pharynx,Protonephridia	8	pharynx cell type	NA	O60637	TSPAN3	Tetraspanin-3	2.3e-09	233	24.893	Q99J59	Tspan1	Tetraspanin-1	2.13e-10	174	30.46	Q0P3Z7	tspan34	Tetraspanin	6.67e-13	178	29.775	Q9V3E5	Tsp66E	Tetraspanin	9.03e-12	182	29.67	Q17526
dd_Smed_v6_2699_0_1	NA	GALC	Galactocerebrosidase	2406	1.68241	7.40507	7.76e-11	1.5339	7.40507	3.81e-09	3.20964	2.89568	1.10842	darkblue	Contig1994	1.77921	9.11157	0.00125338	NA	10,17,28,29,30	Cathepsin+ cell,Protonephridia,Intestine	4	NA	NA	P54803	GALC	Galactocerebrosidase	1.09e-155	640	45.469	P54818	Galc	Galactocerebrosidase	2.69e-163	674	43.769	Q7ZUD5	galcb	Galactosylceramidase b	4.63e-160	678	44.1	NA	NA	NA	NA	NA	NA	NA
dd_Smed_v6_270_0_1	NA	NA	NA	941	1.36117	8.05025	5.68e-05	1.17595	8.05025	0.000660174	2.56893	2.25941	1.13699	darkblue	Contig731	1.84408	11.1263	3.84e-05	NA	2,10,11,24,28,30,35	Epidermal,Cathepsin+ cell,Intestine	4	late epidermal progenitors 2,late epidermal progenitors 1,epidermis DVb,epidermis,phagocytes,ldlrr-1+ parenchymal cells	Gut	NA	NA	NA	NA	NA	NA	NA	NA	NA	NA	NA	NA	NA	NA	NA	NA	NA	NA	NA	NA	NA	NA	NA	NA	NA
dd_Smed_v6_2702_0_1	NA	SCAMP1	Secretory carrier-associated membrane protein 1	1221	1.55318	6.04551	9.06e-09	1.35062	6.04551	7.83e-07	2.93463	2.55021	1.15074	darkblue	Contig2266	1.21516	8.89831	7.83e-05	NA	24,29,30	Epidermal,Protonephridia,Intestine	4	NA	NA	O15126	SCAMP1	Secretory carrier-associated membrane protein 1	9.03e-24	294	36.395	Q8K021	Scamp1	Secretory carrier-associated membrane protein 1	2.19e-24	290	35.862	Q4V8U2	scamp4	Secretory carrier-associated membrane protein	1.09e-25	210	42.857	Q9VXV6	Scamp	Secretory carrier-associated membrane protein	5.72e-19	324	30.864	NA
dd_Smed_v6_2703_0_1	NA	PGS1	CDP-diacylglycerol--glycerol-3-phosphate 3-phosphatidyltransferase, mitochondrial	1785	2.54368	5.48746	1.84e-21	2.46976	5.48746	2.48e-20	5.83076	5.53953	1.05257	darkblue	PL04008B1D05	1.1304	7.31244	0.00557727	NA	24,30	Epidermal,Intestine	4	NA	NA	Q32NB8	PGS1	CDP-diacylglycerol--glycerol-3-phosphate 3-phosphatidyltransferase, mitochondrial	2.44e-83	496	34.677	Q8BHF7	Pgs1	CDP-diacylglycerol--glycerol-3-phosphate 3-phosphatidyltransferase, mitochondrial	1.23e-85	496	35.685	F1RDT5	pgs1	Uncharacterized protein	5.39e-84	488	35.041	Q8SYL0	CG7718	CG7718	4.68e-81	472	34.534	Q9BL79
dd_Smed_v6_271_0_1	fabp7	FABP7	Fatty acid-binding protein, brain	632	3.08993	7.81088	5.44e-15	2.98497	7.81088	4.24e-14	8.51458	7.91709	1.07547	darkblue	Contig167	0.852451	10.1944	0.0149756	uniform subset	2,3,6,10,11,19,30	Epidermal,Intestine,Cathepsin+ cell	5,7	late epidermal progenitors 2,late epidermal progenitors 1,pgrn+ parenchymal cells,phagocytes	Gut	O15540	FABP7	Fatty acid-binding protein, brain	8.76e-30	131	42.748	P51880	Fabp7	Fatty acid-binding protein, brain	1.25e-29	131	41.985	Q503X5	fabp11b	Adipocyte fatty acid-binding protein	2.74e-27	132	41.667	Q8IGA2	fabp	SD12036p	5.35e-20	134	36.567	O01814
dd_Smed_v6_2710_0_1	NA	SHB	SH2 domain-containing adapter protein B	2406	1.06993	5.11668	0.00259501	1.59314	5.11668	4.6e-06	2.09933	3.01706	0.695818	dodgerblue	PL04023B1F12	1.26706	8.61745	0.00316566	NA	NA	NA	NA	NA	NA	Q15464	SHB	SH2 domain-containing adapter protein B	1.87e-22	108	41.667	Q8CG80	Shf	SH2 domain-containing adapter protein F	6.35e-23	108	44.444	A8WHR4	shda	Src homology 2 domain-containing-transforming protein D, a	1.06e-24	108	45.37	Q9VYM1	hwt	Uncharacterized protein, isoform C	1.17e-24	103	44.66	P03949
dd_Smed_v6_2711_0_1	NA	NIT1	Nitrilase homolog 1	1916	1.04484	4.94172	0.000650527	0.950745	4.94172	0.00244082	2.06314	1.93287	1.0674	darkblue	Contig6008	0.595281	7.56429	0.0497684	NA	17	Cathepsin+ cell	4	NA	NA	Q86X76	NIT1	Nitrilase homolog 1	1.06e-91	272	49.265	Q8VDK1	Nit1	Nitrilase homolog 1	3.8e-97	272	51.838	F1R1E1	nit1	Nitrilase 1	8.03e-91	284	46.127	O76464	NitFhit	Nitrilase and fragile histidine triad fusion protein NitFhit	4e-120	440	42.955	O76463
dd_Smed_v6_2715_0_1	NA	USP5	Ubiquitin carboxyl-terminal hydrolase 5	1517	1.06129	5.70424	0.000688689	0.83307	5.70424	0.0109823	2.0868	1.78147	1.17139	darkblue	Contig3326	0.254886	7.75908	0.133717	NA	NA	NA	NA	NA	NA	P45974	USP5	Ubiquitin carboxyl-terminal hydrolase 5	2.99e-91	473	36.786	P56399	Usp5	Ubiquitin carboxyl-terminal hydrolase 5	1.17e-90	453	37.307	Q6NY90	usp5	Ubiquitinyl hydrolase 1	2.79e-88	432	36.574	Q9VZU7	Usp5	Ubiquitinyl hydrolase 1	2.13e-101	426	42.019	Q9GRV2
dd_Smed_v6_2716_0_1	nkx2.2	NKX2-2	Homeobox protein Nkx-2.2	1931	5.37174	6.06666	1.58e-54	5.51756	6.06666	1.15e-56	41.4053	45.8091	0.903866	dodgerblue	Contig5669	2.17071	8.21804	3.91e-05	uniform	6,22,30	Intestine,Neoblast	4	NA	NA	O95096	NKX2-2	Homeobox protein Nkx-2.2	3.57e-32	80	72.5	P42586	Nkx2-2	Homeobox protein Nkx-2.2	3.08e-32	80	72.5	Q90481	nkx2.2a	Homeobox protein Nkx-2.2a	6.13e-33	79	73.418	A8Y527	scro	Scarecrow, isoform F	1.61e-26	68	67.647	Q9NLC2
dd_Smed_v6_2717_0_1	NA	CRYZ	Quinone oxidoreductase	1085	1.80204	4.0055	0.000838946	1.54789	4.0055	0.00525933	3.48713	2.9239	1.19263	darkblue	Contig2408	-0.260082	7.02422	0.0811317	NA	NA	NA	NA	NA	NA	Q08257	CRYZ	Quinone oxidoreductase	3.82e-94	321	47.352	P47199	Cryz	Quinone oxidoreductase	7.39e-95	323	45.511	Q8JFV8	vat1	Synaptic vesicle membrane protein VAT-1 homolog	6.37e-28	196	34.184	Q9V6U9	CG16935	Enoyl-[acyl-carrier-protein] reductase, mitochondrial	1.52e-17	198	30.303	Q4W4Z2
dd_Smed_v6_2719_0_1	NA	NA	NA	614	6.6617	3.16013	7.22e-15	6.44431	3.16013	4.01e-14	101.244	87.0823	1.16263	darkblue	Contig3334	2.34386	8.41858	2.9e-05	NA	30	Intestine	4	NA	NA	NA	NA	NA	NA	NA	NA	NA	NA	NA	NA	NA	NA	NA	NA	NA	NA	NA	NA	NA	NA	NA	NA	NA	NA	NA
dd_Smed_v6_272_0_1	NA	NA	NA	798	5.44209	6.01273	8.76e-55	5.01321	6.01273	2.45e-48	43.4743	32.2943	1.34619	darkblue	Contig65	3.28514	10.5832	2.29e-05	NA	4,6,10,15,17,28,30,41	Cathepsin+ cell,Intestine	4,7	phagocytes	Gut	NA	NA	NA	NA	NA	NA	NA	NA	NA	NA	NA	NA	NA	NA	NA	NA	NA	NA	NA	NA	NA	NA	NA	NA	NA
dd_Smed_v6_2731_0_1	NA	NA	NA	1120	1.03704	6.14511	0.00441743	0.796622	6.14511	0.0390501	2.05201	1.73703	1.18133	darkblue	Contig4109	0.755642	8.25377	0.00232454	NA	20,24,26,30,37,40	Neural,Epidermal,Protonephridia,Intestine,Pharynx	4	NA	NA	NA	NA	NA	NA	NA	NA	NA	NA	NA	NA	NA	NA	NA	NA	NA	NA	NA	NA	A1Z6H0	kune	Kune-kune	5.65e-18	271	26.568	NA
dd_Smed_v6_2732_0_1	NA	SNX33	Sorting nexin-33	2023	2.37268	6.49108	3.09e-16	2.31574	6.49108	1.67e-15	5.17903	4.97859	1.04026	darkblue	Contig2071	1.70643	8.7277	5.11e-05	NA	10,17,28,30	Cathepsin+ cell,Intestine	4	NA	NA	Q8WV41	SNX33	Sorting nexin-33	4.31e-64	391	31.714	Q91ZR2	Snx18	Sorting nexin-18	9.55e-65	343	35.569	A5PMM5	snx18a	Sorting nexin	6.54e-69	414	33.092	Q9NCC3	SH3PX1	Sorting nexin	1.29e-55	410	29.024	Q8I4E2
dd_Smed_v6_2741_0_1	NA	CARHSP1	Calcium-regulated heat-stable protein 1	702	1.00241	4.71714	0.00115899	0.626727	4.71714	0.0639808	2.00334	1.54406	1.29745	darkblue	Contig315	0.17637	8.64941	0.290682	NA	NA	NA	NA	NA	NA	Q9Y2V2	CARHSP1	Calcium-regulated heat-stable protein 1	9.4e-30	108	44.444	Q9CR86	Carhsp1	Calcium-regulated heat stable protein 1	1.55e-29	108	44.444	Q6PHF1	carhsp1	Calcium regulated heat stable protein 1	4.04e-29	108	45.37	Q9VVA0	CG9705	Cold shock domain-containing protein CG9705	7.64e-31	105	45.714	NA
dd_Smed_v6_2743_0_1	NA	SHOC2	Leucine-rich repeat protein SHOC-2	2635	1.56218	6.79067	5.77e-09	1.47589	6.79067	4.74e-08	2.95301	2.78155	1.06164	darkblue	PL06013B2A08	0.123337	6.1709	0.318295	NA	10,29,31	Cathepsin+ cell,Protonephridia	NA	NA	NA	Q9UQ13	SHOC2	Leucine-rich repeat protein SHOC-2	9.93e-60	451	36.807	O88520	Shoc2	Leucine-rich repeat protein SHOC-2	1.89e-59	451	36.807	Q1L8Y7	shoc2	Leucine-rich repeat protein SHOC-2	1.27e-58	451	36.807	Q9VEK6	Sur-8	Leucine-rich repeat protein soc-2 homolog	7.6e-61	451	35.477	Q22875
dd_Smed_v6_2757_0_1	NA	UGCG	Ceramide glucosyltransferase	1788	2.05289	4.18544	5.69e-07	1.87748	4.18544	5.68e-06	4.14938	3.67432	1.12929	darkblue	Contig2541	0.614884	7.78266	0.0802285	NA	30,35	Intestine,Epidermal	4	NA	NA	Q16739	UGCG	Ceramide glucosyltransferase	2.73e-108	385	43.896	O88693	Ugcg	Ceramide glucosyltransferase	4.1e-107	385	43.636	Q501W7	ugcg	UDP-glucose ceramide glucosyltransferase	1.82e-99	385	41.558	Q9W297	GlcT-1	Ceramide glucosyltransferase	3.04e-110	394	44.67	O18037
dd_Smed_v6_2775_0_1	NA	NA	NA	1449	2.87726	5.44931	2.06e-15	2.68465	5.44931	1.18e-13	7.34755	6.42926	1.14283	darkblue	NA	NA	NA	NA	NA	30	Intestine	4	NA	NA	NA	NA	NA	NA	NA	NA	NA	NA	NA	NA	NA	NA	NA	NA	NA	NA	NA	NA	NA	NA	NA	NA	NA	NA	NA
dd_Smed_v6_2782_0_1	NA	ANK3	Ankyrin-3	879	1.85258	4.52839	5.21e-09	1.47455	4.52839	4.6e-06	3.61145	2.77896	1.29957	darkblue	Contig3127	0.845794	8.29515	0.000736394	NA	29,40	Protonephridia	NA	NA	NA	Q12955	ANK3	Ankyrin-3	3.75e-24	189	32.275	G5E8K5	Ank3	Ankyrin-3	6.62e-24	189	31.746	F1QNB1	ank3a	Ankyrin 3a	1.11e-26	200	35	Q8SWY2	Ank2	GH01626p	2.18e-20	189	29.63	Q8MQG0
dd_Smed_v6_2783_0_1	NA	HMCN1	Hemicentin-1	1481	0.895301	3.99919	0.0114055	1.00524	3.99919	0.00440892	1.86	2.00728	0.926626	dodgerblue	Contig2486	0.956303	7.78711	0.000527107	NA	10,29,31,39	Cathepsin+ cell,Protonephridia	4	NA	NA	Q96RW7	HMCN1	Hemicentin-1	1.61e-32	190	38.947	D3YXG0	Hmcn1	Hemicentin-1	1.36e-32	190	38.947	F1QVQ2	hmcn1	Hemicentin 1	1.04e-34	184	40.761	Q9U631	Sema5c	Semaphorin 5C	1.08e-28	190	35.789	Q7Z291
dd_Smed_v6_2784_0_1	rhoab	RHOA	Transforming protein RhoA	1018	2.60961	4.34705	3.06e-09	2.21027	4.34705	5.68e-07	6.1034	4.62762	1.31891	darkblue	NA	NA	NA	NA	uniform	2,13,17,29	Epidermal,Muscle,Cathepsin+ cell,Protonephridia	NA	NA	NA	P61586	RHOA	Transforming protein RhoA	7.01e-39	167	42.515	Q9QUI0	Rhoa	Transforming protein RhoA	7.55e-39	167	42.515	Q800Q4	rhoab	Small GTPase RhoA	4.9e-39	169	42.604	P48148	Rho1	Ras-like GTP-binding protein Rho1	5.14e-36	167	41.317	Q22038
dd_Smed_v6_279_0_1	rpz4	NA	NA	1463	7.72012	11.0057	4.09e-50	4.22312	11.0057	4.87e-21	210.857	18.6761	11.2902	darkgreen	PL05002B1F01	-0.487931	8.01115	0.211979	goblet	NA	NA	8	goblet cells	NA	NA	NA	NA	NA	NA	NA	NA	NA	NA	NA	NA	NA	F1R3H1	rpz4	Rapunzel 4	9.64e-14	299	23.411	NA	NA	NA	NA	NA	NA	NA
dd_Smed_v6_2790_0_1	NA	ARL6IP1	ADP-ribosylation factor-like protein 6-interacting protein 1	1388	1.93475	6.06146	8.46e-14	1.89484	6.06146	3.1e-13	3.82312	3.71882	1.02805	darkblue	Contig6072	0.85377	8.77434	0.006809	NA	NA	NA	NA	NA	NA	Q15041	ARL6IP1	ADP-ribosylation factor-like protein 6-interacting protein 1	4.83e-13	176	27.273	Q9JKW0	Arl6ip1	ADP-ribosylation factor-like protein 6-interacting protein 1	4.34e-14	176	28.977	Q7ZWB4	arl6ip1	ADP-ribosylation factor-like 6 interacting protein	8.52e-18	191	28.272	Q9VES1	CG10326	ARL-6-interacting protein 1 homolog	6.32e-05	179	28.492	NA
dd_Smed_v6_2791_0_1	NA	NA	NA	812	6.02535	5.27961	2.6e-52	5.58251	5.27961	1.32e-46	65.1345	47.9184	1.35928	darkblue	Contig2041	2.79623	9.29382	2.29e-05	NA	30	Intestine	4	NA	NA	NA	NA	NA	NA	NA	NA	NA	NA	NA	NA	NA	NA	NA	NA	NA	NA	NA	NA	NA	NA	NA	NA	NA	NA	NA
dd_Smed_v6_2795_0_1	NA	PSENEN	Gamma-secretase subunit PEN-2	771	1.13571	6.20183	0.000553652	0.888745	6.20183	0.00977252	2.19727	1.85156	1.18671	darkblue	Contig138	0.839995	9.10716	0.00155041	NA	NA	NA	NA	NA	NA	Q9NZ42	PSENEN	Gamma-secretase subunit PEN-2	5.79e-20	99	41.414	Q9CQR7	Psenen	Gamma-secretase subunit PEN-2	5.53e-21	99	43.434	Q8JHF0	psenen	Gamma-secretase subunit PEN-2	8.36e-21	99	41.414	Q86BE9	pen-2	Gamma-secretase subunit pen-2	8.23e-22	100	43	Q9U357
dd_Smed_v6_28_0_1	NA	TFPI	Tissue factor pathway inhibitor	320	5.11162	10.9657	2.46e-41	5.24662	10.9657	6.37e-43	34.5741	37.9656	0.910669	dodgerblue	Contig7372	-0.935942	11.1029	0.00801607	NA	19	Intestine	5	NA	NA	P10646	TFPI	Tissue factor pathway inhibitor	2.2e-12	59	47.458	Q3UW09	Spint3	Putative uncharacterized protein	4.99e-16	52	53.846	A0A0R4ISD8	podxl2	Podocalyxin-like 2	1.28e-16	62	45.161	Q868Z9	Ppn	Papilin	7.58e-11	60	38.333	O76840
dd_Smed_v6_280_0_1	NA	ODC1	Ornithine decarboxylase	2068	1.4331	9.20389	1.84e-05	1.21949	9.20389	0.000352376	2.70027	2.32864	1.15959	darkblue	Contig1882	1.26547	11.7691	0.000117859	NA	2,4,11,15,19,26,35	Epidermal,Cathepsin+ cell,Intestine,Protonephridia	NA	neoblast 8,late epidermal progenitors 2,late epidermal progenitors 1,pgrn+ parenchymal cells	NA	P11926	ODC1	Ornithine decarboxylase	5.27e-91	467	35.974	P00860	Odc1	Ornithine decarboxylase	3.08e-92	447	37.584	Q9DGJ4	odc1	Odc1 protein	4.18e-95	439	37.358	P40807	Odc1	Ornithine decarboxylase 1	4.87e-57	287	39.024	P41931
dd_Smed_v6_2804_0_1	NA	GMFB	Glia maturation factor beta	815	1.07302	5.20143	0.00684155	0.852549	5.20143	0.041776	2.10383	1.80569	1.16511	darkblue	Contig3584	0.861042	7.7219	0.00340228	NA	17,28	Cathepsin+ cell	NA	NA	NA	P60983	GMFB	Glia maturation factor beta	1.15e-45	129	51.163	Q9CQI3	Gmfb	Glia maturation factor beta	1.24e-45	129	51.938	Q24JU9	gmfg	Zgc:136987	4.16e-42	129	46.512	Q9VJL6	GMF	GEO09696p1	5.55e-32	127	42.52	NA
dd_Smed_v6_2813_0_1	chdh	CHDH	Choline dehydrogenase, mitochondrial	3688	2.91111	6.30988	7.48e-20	2.98209	6.30988	1.24e-20	7.52196	7.90131	0.951989	dodgerblue	Contig3337	0.983805	7.30538	0.00241086	uniform	10,28,30	Cathepsin+ cell,Intestine	4,7	NA	NA	Q8NE62	CHDH	Choline dehydrogenase, mitochondrial	0	571	54.991	Q8BJ64	Chdh	Choline dehydrogenase, mitochondrial	0	558	56.989	NA	NA	NA	NA	NA	NA	Q8MQY9	CG45065	RE28171p	6.72e-96	615	35.447	NA
dd_Smed_v6_2825_0_1	NA	EPB41L3	Band 4.1-like protein 3	3132	1.41699	6.90753	1.23e-06	1.04851	6.90753	0.000487352	2.67028	2.06839	1.29099	darkblue	PL06016B2D09	0.13235	6.40921	0.268136	NA	9,17,20,21,23,24,27,30,33,37,38	Neural,Cathepsin+ cell,Epidermal,Pharynx,Intestine,Parapharyngeal	4,7	NA	Neural 2	A8K968	EPB41L3	Band 4.1-like protein 3	5.24e-108	337	50.742	Q9WV92	Epb41l3	Band 4.1-like protein 3	1.35e-107	346	50.289	E7F9M7	si:ch73-18b11.1	Si:ch73-18b11.1	2.86e-106	342	47.661	Q9V8R9	cora	Protein 4.1 homolog	2.27e-99	333	47.447	O17905
dd_Smed_v6_2826_0_1	NA	OPCML	Opioid-binding protein/cell adhesion molecule	1464	2.35563	2.35534	0.000327966	1.8625	2.35534	0.00577352	5.11817	3.63636	1.4075	darkblue	Contig692	0.726062	7.32089	0.0124328	NA	24,27,30,37,38,40	Epidermal,Pharynx,Intestine,Parapharyngeal,Protonephridia	4	NA	NA	Q14982	OPCML	Opioid-binding protein/cell adhesion molecule	2.17e-17	328	25.61	Q3TYL3	Opcml	Putative uncharacterized protein	5.38e-19	350	26	Q1RM48	ntm	Zgc:136455	3.1e-16	253	25.692	Q24372	Lac	Lachesin	4.08e-25	248	28.629	G5EG33
dd_Smed_v6_2830_0_1	NA	NA	NA	1020	1.93093	2.76555	0.00191452	2.38448	2.76555	0.000127232	3.81302	5.22157	0.730243	dodgerblue	NA	NA	NA	NA	NA	NA	NA	NA	NA	NA	NA	NA	NA	NA	NA	NA	NA	NA	NA	NA	NA	NA	A5PMJ7	stx12	Syntaxin 12	5.64e-05	235	24.255	Q7K0X9	Syx7	LD23667p	7.61e-06	74	36.486	O62236
dd_Smed_v6_2832_0_1	NA	ACSS3	Acyl-CoA synthetase short-chain family member 3, mitochondrial	2719	1.85541	5.75732	2.89e-11	1.8751	5.75732	2.07e-11	3.61854	3.66828	0.986441	dodgerblue	PL06013A1E11	-0.327136	6.84559	0.100705	NA	2,3,6,19,28,31,35	Epidermal,Intestine,Cathepsin+ cell	0,7	NA	NA	Q9H6R3	ACSS3	Acyl-CoA synthetase short-chain family member 3, mitochondrial	0	620	55.968	Q14DH7	Acss3	Acyl-CoA synthetase short-chain family member 3, mitochondrial	0	622	55.305	F1QYS7	acss1	Acetyl-coenzyme A synthetase	1.96e-103	638	32.288	Q9VP61	AcCoAS	Acetyl-coenzyme A synthetase	7.53e-113	661	33.888	O45873
dd_Smed_v6_2836_0_1	NA	APBA1	Amyloid beta A4 precursor protein-binding family A member 1	2206	1.35203	4.16313	0.000160936	1.30165	4.16313	0.000334944	2.55271	2.46511	1.03553	darkblue	Contig657	1.0796	8.20409	0.000246457	NA	1,8,21,23	Neural	NA	NA	NA	Q02410	APBA1	Amyloid beta A4 precursor protein-binding family A member 1	2.92e-121	280	57.857	B2RUJ5	Apba1	Amyloid beta A4 precursor protein-binding family A member 1	7.36e-121	280	57.857	E7FED4	si:ch73-40i7.5	Si:ch73-40i7.5	6.5e-110	266	52.632	M9PGU7	X11Lbeta	X11Lbeta, isoform D	4.87e-138	262	66.794	O17583
dd_Smed_v6_2839_0_1	NA	MTCH1	Mitochondrial carrier homolog 1	1134	1.50366	5.41399	2.09e-06	1.42568	5.41399	8.33e-06	2.83561	2.6864	1.05554	darkblue	Contig864	1.38132	9.47108	0.000226213	NA	NA	NA	NA	NA	NA	Q9NZJ7	MTCH1	Mitochondrial carrier homolog 1	7.84e-25	299	28.094	Q791T5	Mtch1	Mitochondrial carrier homolog 1	3.04e-24	299	27.759	Q9PUL9	mtch2	Mitochondrial carrier homolog 2	8.08e-27	288	25	Q9V3Y4	Mtch	LD43650p	3.53e-23	305	25.574	H2KYJ5
dd_Smed_v6_2840_0_1	NA	DNAJC5B	DnaJ homolog subfamily C member 5B	1079	1.14577	6.94799	0.00101713	1.04037	6.94799	0.003604	2.21264	2.05676	1.07579	darkblue	Contig2341	0.928222	7.99342	0.000292907	NA	30,32	Intestine,Neural	4	NA	NA	Q9UF47	DNAJC5B	DnaJ homolog subfamily C member 5B	4.09e-24	89	52.809	Q9CQ94	Dnajc5b	DnaJ homolog subfamily C member 5B	3.14e-22	89	48.315	E7FF34	dnajc5ab	DnaJ (Hsp40) homolog, subfamily C, member 5ab	1.34e-23	91	50.549	Q03751	Csp	DnaJ homolog subfamily C member 5 homolog	4.34e-25	89	50.562	E5QCE7
dd_Smed_v6_2841_0_1	NA	NA	NA	1408	6.26653	5.98284	1.85e-36	6.25162	5.98284	2.65e-36	76.9864	76.1947	1.01039	darkblue	Contig2	2.56939	10.1043	5.39e-05	NA	30	Intestine	4,5	NA	NA	NA	NA	NA	NA	NA	NA	NA	NA	NA	NA	NA	NA	F1QSR7	panx1b	Pannexin	4.41e-07	94	27.66	Q9VAS7	Inx3	Innexin inx3	3.4e-18	292	29.11	Q17394
dd_Smed_v6_2845_0_1	NA	NA	NA	983	3.68902	3.74893	1.23e-15	3.45285	3.74893	5.49e-14	12.8975	10.9499	1.17786	darkblue	Contig570	0.562125	7.35336	0.0271903	NA	19,27,29,37,40	Intestine,Pharynx,Protonephridia	NA	NA	NA	NA	NA	NA	NA	NA	NA	NA	NA	NA	NA	NA	NA	NA	NA	NA	NA	NA	NA	NA	NA	NA	NA	NA	NA	NA
dd_Smed_v6_2862_0_1	NA	TSPAN31	Tetraspanin-31	763	1.30113	7.06076	2.32e-06	1.39198	7.06076	4.71e-07	2.46421	2.62438	0.93897	dodgerblue	NA	NA	NA	NA	NA	NA	NA	NA	NA	NA	Q12999	TSPAN31	Tetraspanin-31	2.47e-20	225	38.667	Q9CQ88	Tspan31	Tetraspanin-31	8.18e-23	227	40.088	Q7ZUB3	tspan31	Tetraspanin-31	4.44e-22	226	37.611	Q8IMQ7	Tsp97E	Tetraspanin 97E, isoform D	9.14e-21	225	40.444	NA
dd_Smed_v6_2871_0_1	cyp2u1	CYP2U1	Cytochrome P450 2U1	1758	3.34128	5.21609	5.04e-14	3.47543	5.21609	6.97e-15	10.135	11.1227	0.911205	dodgerblue	Contig4815	1.63474	8.18554	5.77e-05	basal	10,30,31	Cathepsin+ cell,Intestine	4	NA	NA	Q7Z449	CYP2U1	Cytochrome P450 2U1	2.08e-55	143	40.559	Q9CX98	Cyp2u1	Cytochrome P450 2U1	1e-55	143	43.357	B8A5Q1	cyp2u1	Cytochrome P450, family 2, subfamily U, polypeptide 1	3.08e-60	168	39.881	Q95078	Cyp18a1	Cytochrome P450 18a1	2.24e-52	320	26.562	O44704
dd_Smed_v6_2879_0_1	NA	RAB6A	RAB6A, member RAS oncogene family, isoform CRA_b	764	1.4757	4.97615	4.18e-08	1.58704	4.97615	3.84e-09	2.78118	3.00433	0.925725	dodgerblue	Contig3333	1.73594	8.04854	5.79e-05	NA	10,30	Cathepsin+ cell,Intestine	4	NA	NA	A0A024R5H8	RAB6A	RAB6A, member RAS oncogene family, isoform CRA_b	1.16e-29	157	35.669	P35292	Rab17	Ras-related protein Rab-17	4.13e-33	166	37.349	A5PLA1	rab39ba	RAB39B, member RAS oncogene family a	9.31e-30	205	34.146	O18334	Rab6	Ras-related protein Rab6	1.64e-30	206	29.126	Q22782
dd_Smed_v6_2886_0_1	zgc:153993	BAK1	Bcl-2 homologous antagonist/killer	847	2.05079	6.15388	8.89e-08	1.77428	6.15388	4.47e-06	4.14334	3.42068	1.21126	darkblue	Contig6675	0.799741	8.93629	0.0117253	uniform	6	Intestine	7	NA	NA	Q16611	BAK1	Bcl-2 homologous antagonist/killer	4.71e-08	163	22.086	O08734	Bak1	Bcl-2 homologous antagonist/killer	7.58e-07	156	21.154	Q08BX9	zgc:153993	Zgc:153993	2.18e-09	171	26.316	NA	NA	NA	NA	NA	NA	NA
dd_Smed_v6_2889_0_1	NA	NA	NA	2512	1.02963	5.54864	0.000173674	1.1236	5.54864	4.31e-05	2.04149	2.1789	0.936937	dodgerblue	PL06015B2E12	0.29332	6.86679	0.159157	NA	8,9,20,21,24,33	Neural,Epidermal	4	NA	NA	NA	NA	NA	NA	NA	NA	NA	NA	NA	NA	NA	NA	NA	NA	NA	NA	NA	NA	NA	NA	NA	NA	NA	NA	NA
dd_Smed_v6_2891_0_1	NA	PDCD10	Programmed cell death protein 10	1263	1.41637	7.16363	1.88e-07	1.41621	7.16363	2.21e-07	2.66913	2.66884	1.00011	darkblue	Contig3159	1.10166	9.25129	0.000368222	NA	NA	NA	NA	NA	NA	Q9BUL8	PDCD10	Programmed cell death protein 10	3.16e-42	191	43.455	Q8VE70	Pdcd10	Programmed cell death protein 10	5.35e-42	191	43.455	Q6PHH3	pdcd10a	Programmed cell death protein 10-A	2.14e-42	193	43.523	Q9VF70	Ccm3	Cerebral cavernous malformation 3 ortholog	1.63e-43	199	40.201	NA
dd_Smed_v6_2892_0_1	NA	SCP2	Non-specific lipid-transfer protein	1380	1.75356	4.61802	3.69e-07	2.15605	4.61802	4.28e-10	3.37189	4.45693	0.75655	dodgerblue	Contig5464	0.555953	7.24158	0.0169231	NA	28,31	Cathepsin+ cell	NA	NA	NA	P22307	SCP2	Non-specific lipid-transfer protein	1.15e-173	396	59.596	P32020	Scp2	Non-specific lipid-transfer protein	6.77e-180	404	57.673	Q32PL7	zgc:123276	Zgc:123276	6.46e-10	363	23.14	Q9VJ44	CG17597	SD06839p	0	402	59.204	G5EDP2
dd_Smed_v6_2894_0_1	NA	AASS	Alpha-aminoadipic semialdehyde synthase, mitochondrial	3192	0.8911	4.55261	0.0147963	1.13798	4.55261	0.00151298	1.85459	2.20073	0.842715	dodgerblue	PL03019B1D08	0.244969	6.84078	0.450859	NA	10	Cathepsin+ cell	7	NA	Cluster 11	Q9UDR5	AASS	Alpha-aminoadipic semialdehyde synthase, mitochondrial	0	909	52.475	Q99K67	Aass	Alpha-aminoadipic semialdehyde synthase, mitochondrial	0	907	51.378	E7FD66	aass	Aminoadipate-semialdehyde synthase	0	907	51.929	Q9VLX0	LKRSDH	Lysine ketoglutarate reductase/saccharopine dehydrogenase, isoform A	0	919	53.101	U4PFH6
dd_Smed_v6_2906_0_1	rab10	RAB10	Ras-related protein Rab-10	924	3.923	5.38319	1.21e-27	3.6639	5.38319	1.07e-24	15.1685	12.6749	1.19673	darkblue	Contig985	1.8169	8.60754	5.57e-05	uniform	10,30	Cathepsin+ cell,Intestine	4,7	NA	NA	P61026	RAB10	Ras-related protein Rab-10	2.2e-65	170	54.118	P61027	Rab10	Ras-related protein Rab-10	2.42e-65	170	54.118	Q6DGV5	rab10	RAB10, member RAS oncogene family	3.26e-66	181	51.934	O15971	Rab10	LD39986p	2.6e-66	204	49.51	Q94148
dd_Smed_v6_2908_0_1	NA	HGD	Homogentisate 1,2-dioxygenase	1596	1.02244	4.11439	0.033288	1.33804	4.11439	0.0045511	2.03135	2.52808	0.803514	dodgerblue	Contig4548	-0.735218	7.47933	0.00187008	NA	4,6,10,19,28,31	Cathepsin+ cell,Intestine	7	pgrn+ parenchymal cells	Cathepsin+ a	Q93099	HGD	Homogentisate 1,2-dioxygenase	0	435	60	O09173	Hgd	Homogentisate 1,2-dioxygenase	0	435	59.77	NA	NA	NA	NA	NA	NA	NA	NA	NA	NA	NA	NA	Q9Y041
dd_Smed_v6_2914_0_1	rock1	ROCK1	Rho-associated protein kinase 1	3983	1.70954	7.01348	1.51e-07	1.72595	7.01348	1.34e-07	3.27057	3.30797	0.988693	dodgerblue	Contig5319	1.36439	7.62771	0.000144835	uniform	10,19,20,24,27,29,30,37,38,40	Cathepsin+ cell,Intestine,Neural,Epidermal,Pharynx,Protonephridia,Parapharyngeal	4	NA	NA	Q13464	ROCK1	Rho-associated protein kinase 1	2.35e-89	529	35.917	P70335	Rock1	Rho-associated protein kinase 1	8.88e-91	529	35.917	E7F9X9	rock1	Rho-associated protein kinase	7.72e-91	526	36.502	X2JC83	Rok	Rho kinase, isoform B	2.6e-87	381	41.207	O01583
dd_Smed_v6_2915_0_1	NA	RAB7L1	RAB7, member RAS oncogene family-like 1	1009	1.47047	5.3073	3.73e-05	1.40586	5.3073	9.63e-05	2.77112	2.64975	1.0458	darkblue	Contig2676	1.71159	8.32613	0.000129179	NA	10,15,17,28,30,39	Cathepsin+ cell,Intestine	NA	NA	NA	Q6FGU7	RAB7L1	RAB7, member RAS oncogene family-like 1	8.11e-64	172	50	Q91YQ1	Rab29	Ras-related protein Rab-7L1	3.47e-65	185	48.108	Q7ZW88	rab32a	RAB32, member RAS oncogene family	5.86e-58	177	50.282	A1Z7S1	Rab32	FI09421p	2.7e-55	182	48.901	G5EBF0
dd_Smed_v6_2918_0_1	NA	SPNS1	Protein spinster homolog 1	1806	3.45539	5.13921	2.86e-13	3.37948	5.13921	9.72e-13	10.9692	10.4069	1.05403	darkblue	Contig7004	2.0431	8.76866	0.00134773	NA	30	Intestine	4	NA	NA	Q9H2V7	SPNS1	Protein spinster homolog 1	4.72e-122	496	41.532	Q8R0G7	Spns1	Protein spinster homolog 1	5.91e-121	473	41.86	Q7ZU13	spns1	Protein spinster homolog 1	8.05e-113	437	44.622	Q9GQQ0	spin	Protein spinster	1.86e-109	403	45.161	O01927
dd_Smed_v6_2923_0_1	NA	ENOSF1	Mitochondrial enolase superfamily member 1	1759	4.40192	5.16215	1.41e-28	5.12717	5.16215	3.46e-36	21.1402	34.9488	0.604892	orange	Contig3419	-0.518727	7.72718	0.0070075	NA	19	Intestine	2,5	goblet cells	NA	Q7L5Y1	ENOSF1	Mitochondrial enolase superfamily member 1	0	432	53.704	NA	NA	NA	NA	NA	NA	F1Q510	enosf1	Enolase superfamily member 1	0	441	53.061	NA	NA	NA	NA	NA	NA	NA
dd_Smed_v6_2929_0_1	NA	GLIPR2	Golgi-associated plant pathogenesis-related protein 1	854	2.01951	4.7416	7.48e-12	-0.112363	4.7416	0.813761	4.05447	0.925072	4.38287	darkgreen	Contig1497	3.00467	9.46132	2.39e-05	NA	10,17,31	Cathepsin+ cell	NA	NA	NA	Q9H4G4	GLIPR2	Golgi-associated plant pathogenesis-related protein 1	3.9e-27	153	41.176	Q9CYL5	Glipr2	Golgi-associated plant pathogenesis-related protein 1	7.03e-28	149	41.611	A0A0R4IVU8	im:7150988	Im:7150988	1.95e-25	144	42.361	Q9VI35	CG31482	Uncharacterized protein	1.3e-26	149	39.597	Q20608
dd_Smed_v6_2951_0_1	NA	SCARB2	Lysosome membrane protein 2	1821	1.34193	6.85929	1.26e-06	1.28314	6.85929	4.37e-06	2.5349	2.43368	1.04159	darkblue	PL06004B1C11	0.0750629	6.95719	0.701606	NA	4,6,19,26	Cathepsin+ cell,Intestine,Protonephridia	2	NA	NA	Q14108	SCARB2	Lysosome membrane protein 2	2.08e-89	410	38.537	O35114	Scarb2	Lysosome membrane protein 2	2.86e-89	410	38.78	Q8JGR8	scarb2	Lysosome membrane protein II	4.01e-90	437	37.3	Q7KVF1	emp	Epithelial membrane protein, isoform A	4.67e-66	468	29.701	NA
dd_Smed_v6_2970_0_1	NA	HAL	Histidine ammonia-lyase	1238	3.95165	2.31703	9.5e-06	4.52774	2.31703	6.76e-07	15.4727	23.0667	0.670779	dodgerblue	PL06017B1B02	0.225259	7.24131	0.182233	NA	6,19	Intestine	2	NA	NA	P42357	HAL	Histidine ammonia-lyase	2.14e-99	337	48.368	P35492	Hal	Histidine ammonia-lyase	2.86e-98	337	48.368	F6P849	hal	Histidine ammonia-lyase	6.34e-107	337	50.742	NA	NA	NA	NA	NA	NA	Q20502
dd_Smed_v6_2976_0_1	NA	NA	NA	530	1.31029	5.32251	0.000903131	1.33053	5.32251	0.000849297	2.47991	2.51495	0.986067	dodgerblue	Contig23	0.464768	8.73245	0.0359292	NA	NA	NA	NA	NA	NA	NA	NA	NA	NA	NA	NA	NA	NA	NA	NA	NA	NA	B8JLV7	vma21	Vacuolar ATPase assembly integral membrane protein vma21	9.84e-05	40	47.5	NA	NA	NA	NA	NA	NA	NA
dd_Smed_v6_2981_0_1	NA	NPL	N-acetylneuraminate lyase	1075	5.35013	2.78235	2.02e-14	5.64937	2.78235	1.4e-15	40.7895	50.1914	0.812679	dodgerblue	Contig4097	-0.476699	8.14853	0.00554901	NA	19	Intestine	2,5	NA	NA	Q9BXD5	NPL	N-acetylneuraminate lyase	7.31e-24	191	31.937	Q9DCJ9	Npl	N-acetylneuraminate lyase	3.77e-25	272	26.103	Q6NYR8	npl	N-acetylneuraminate lyase	2.4e-19	214	28.037	NA	NA	NA	NA	NA	NA	NA
dd_Smed_v6_2982_0_1	NA	NA	NA	1234	1.14908	4.31968	0.000415201	0.85319	4.31968	0.0129175	2.21773	1.80649	1.22765	darkblue	Contig5901	0.138816	8.92354	0.530652	NA	2,3,11,24,42	Epidermal,Cathepsin+ cell	NA	NA	Early_epithelial_progeny	NA	NA	NA	NA	NA	NA	NA	NA	NA	NA	NA	NA	NA	NA	NA	NA	NA	NA	NA	NA	NA	NA	NA	NA	NA
dd_Smed_v6_2991_0_1	NA	RAB5A	Ras-related protein Rab-5A	2763	1.19749	4.86887	0.00184654	1.21629	4.86887	0.00176533	2.29341	2.32348	0.987058	dodgerblue	Contig1027	0.734666	9.42861	0.000547359	NA	NA	NA	NA	NA	NA	P20339	RAB5A	Ras-related protein Rab-5A	1.17e-67	182	59.89	Q9CQD1	Rab5a	Ras-related protein Rab-5A	1.31e-67	182	59.89	Q7ZUW5	rab5aa	RAB5A, member RAS oncogene family	3.9e-66	178	59.551	Q9V3I2	Rab5	Drab5	4.4e-65	167	62.275	P91857
dd_Smed_v6_2996_0_1	NA	RIN2	Ras and Rab interactor 2	3160	1.53452	3.96481	6.51e-05	1.38057	3.96481	0.000409836	2.89691	2.60371	1.11261	darkblue	PL04015A2B09	0.696978	6.42771	0.00779143	NA	4,10,15,17,41	Cathepsin+ cell	4	NA	NA	Q8WYP3	RIN2	Ras and Rab interactor 2	2.68e-18	365	24.658	Q9D684	Rin2	Ras and Rab interactor 2	2.56e-17	364	23.626	Q56A36	hsh2d	Hematopoietic SH2 domain-containing protein homolog	8.61e-05	76	28.947	Q8MQW8	spri	Protein sprint	1.83e-36	400	26	G5ECF0
dd_Smed_v6_3_0_1	NA	PS1TP5BP1	HCG15971, isoform CRA_a	1634	2.34466	13.2359	3.07e-11	2.25047	13.2359	2.05e-10	5.0794	4.75836	1.06747	darkblue	Contig1138	3.30363	14.0502	2.58e-05	NA	4,6,10,19,22,28,30,31,39,42,43	Cathepsin+ cell,Intestine,Neoblast	0,4,7	pgrn+ parenchymal cells,phagocytes,aqp+ parenchymal cells,ldlrr-1+ parenchymal cells,glia,goblet cells,parenchymal progenitors,psd+ cells,gut progenitors	NA	Q1KLZ0	PS1TP5BP1	HCG15971, isoform CRA_a	0	374	94.92	P60710	Actb	Actin, cytoplasmic 1	0	374	94.92	Q7ZVI7	actba	Actin, cytoplasmic 1	0	374	95.187	P10987	Act5C	Actin-5C	0	376	94.947	P10984
dd_Smed_v6_300_0_1	spint3	COL6A3	Collagen alpha-3(VI) chain	395	4.69883	10.7845	1.22e-32	7.04397	10.7845	3.09e-58	25.9711	131.962	0.196808	darkorange	PL06022A1C11	0.00810193	12.1371	0.70989	goblet	19,24,29,30	Intestine,Epidermal,Protonephridia	4,8	goblet cells	NA	P12111	COL6A3	Collagen alpha-3(VI) chain	4.41e-12	51	45.098	Q3UW09	Spint3	Putative uncharacterized protein	3.09e-13	57	45.614	A0A0R4ISD8	podxl2	Podocalyxin-like 2	1.1e-10	51	43.137	Q9VQU0	CG10031	Uncharacterized protein	1.64e-10	53	39.623	O76840
dd_Smed_v6_3005_0_1	NA	ADD3	Gamma-adducin	1642	1.51429	4.73295	9.97e-07	1.57452	4.73295	4.03e-07	2.85659	2.97836	0.959115	dodgerblue	Contig5036	1.01654	8.11034	0.000667055	NA	NA	NA	NA	NA	NA	Q9UEY8	ADD3	Gamma-adducin	2.45e-10	279	22.222	Q9QYB5	Add3	Gamma-adducin	8.23e-11	281	22.064	A0A0R4IT10	add1	Adducin 1 (alpha)	2.62e-10	235	22.128	Q02645	hts	Protein hu-li tai shao	7.98e-11	288	23.264	G8JYB0
dd_Smed_v6_3013_0_1	NA	NA	NA	539	1.68366	6.09901	1.4e-07	1.535	6.09901	1.99e-06	3.21241	2.89789	1.10853	darkblue	NA	NA	NA	NA	NA	24	Epidermal	NA	NA	NA	NA	NA	NA	NA	NA	NA	NA	NA	NA	NA	NA	NA	NA	NA	NA	NA	NA	NA	Q9W3T7	bou	Boudin	6.41e-12	100	37	NA
dd_Smed_v6_3016_0_1	NA	NA	NA	933	4.03081	6.60386	1.2e-44	3.84628	6.60386	2.38e-41	16.3454	14.3829	1.13645	darkblue	Contig4571	0.326658	7.2024	0.121957	NA	6,19,26,29,30,40	Intestine,Protonephridia	0,5,7	NA	NA	NA	NA	NA	NA	NA	NA	NA	NA	NA	NA	NA	NA	NA	NA	NA	NA	NA	NA	NA	NA	NA	NA	NA	NA	NA
dd_Smed_v6_3019_0_1	NA	SCCPDH	Saccharopine dehydrogenase-like oxidoreductase	1450	2.12748	6.2485	4.14e-13	1.92516	6.2485	6.05e-11	4.36952	3.7978	1.15054	darkblue	Contig6372	0.994721	9.19861	0.00416084	NA	30	Intestine	NA	NA	NA	Q8NBX0	SCCPDH	Saccharopine dehydrogenase-like oxidoreductase	2.81e-116	421	43.468	Q8R127	Sccpdh	Saccharopine dehydrogenase-like oxidoreductase	2.16e-114	421	42.518	E7FAL8	zgc:174379	Zgc:174379	1.04e-123	423	44.917	Q9VN86	CG2604	AT14148p	1.03e-123	419	44.153	NA
dd_Smed_v6_3021_0_1	NA	ACSL4	Long-chain-fatty-acid--CoA ligase 4	2654	1.57302	6.30072	2.44e-07	1.43141	6.30072	3.34e-06	2.97526	2.69709	1.10314	darkblue	Contig6048	-0.0490684	6.58659	0.780768	NA	6,15,39	Intestine,Cathepsin+ cell	0,7	NA	Cathepsin+ b	O60488	ACSL4	Long-chain-fatty-acid--CoA ligase 4	0	731	46.648	Q9QUJ7	Acsl4	Long-chain-fatty-acid--CoA ligase 4	0	731	46.238	F1R452	acsl4a	Acyl-CoA synthetase long-chain family member 4a	0	736	43.886	Q8T3L1	Acsl	Acyl-CoA synthetase long-chain, isoform A	0	732	41.12	Q20121
dd_Smed_v6_3032_0_1	NA	HAAO	3-hydroxyanthranilate 3,4-dioxygenase	1021	6.47322	6.07274	3.71e-53	6.35869	6.07274	9e-52	88.8452	82.0649	1.08262	darkblue	Contig6000	1.36319	7.35826	0.00161243	NA	30	Intestine	4	NA	NA	P46952	HAAO	3-hydroxyanthranilate 3,4-dioxygenase	1.58e-46	267	31.835	Q78JT3	Haao	3-hydroxyanthranilate 3,4-dioxygenase	2.06e-49	275	33.455	NA	NA	NA	NA	NA	NA	NA	NA	NA	NA	NA	NA	NA
dd_Smed_v6_3038_0_1	NA	TRAF6	TNF receptor-associated factor 6	1562	2.28913	7.35248	3.93e-16	2.16356	7.35248	1.49e-14	4.8876	4.4802	1.09093	darkblue	Contig1922	1.85153	7.63583	0.0005132	NA	10,28,30	Cathepsin+ cell,Intestine	4	NA	NA	Q9Y4K3	TRAF6	TNF receptor-associated factor 6	7.47e-11	116	30.172	P70196	Traf6	TNF receptor-associated factor 6	8.77e-11	116	31.034	Q6IWL4	traf6	TNF receptor-associated factor 6	9.41e-11	132	31.061	Q9W3I9	Traf6	GH01161p	7.3e-07	145	23.448	NA
dd_Smed_v6_3041_0_1	NA	TMEM120B	Transmembrane protein 120B	1296	1.02106	4.60518	0.00182083	0.706474	4.60518	0.0451179	2.02941	1.63181	1.24366	darkblue	Contig2527	0.296679	8.30475	0.13864	NA	15,17,19	Cathepsin+ cell,Intestine	NA	NA	NA	A0PK00	TMEM120B	Transmembrane protein 120B	2.64e-98	326	45.092	Q3TA38	Tmem120b	Transmembrane protein 120B	2.81e-98	326	46.319	A3KNK1	tmem120a	Transmembrane protein 120A	7.74e-95	325	47.385	Q9U1M2	CG32795	Transmembrane protein 120 homolog	1.95e-101	332	46.386	O76687
dd_Smed_v6_3043_0_1	NA	CYLD	Ubiquitin carboxyl-terminal hydrolase CYLD	2549	1.48966	5.08561	1.85e-05	1.31858	5.08561	0.000190462	2.80823	2.49421	1.1259	darkblue	NA	NA	NA	NA	NA	17,18,20,21,23,33	Cathepsin+ cell,Neural	NA	NA	NA	Q9NQC7	CYLD	Ubiquitin carboxyl-terminal hydrolase CYLD	4.05e-43	472	28.602	Q80TQ2	Cyld	Ubiquitin carboxyl-terminal hydrolase CYLD	1.5e-42	472	28.814	F8W5E2	cylda	Cylindromatosis (turban tumor syndrome), a	3.33e-42	390	29.231	Q8IPC3	CYLD	Cylindromatosis ortholog, isoform B	1.87e-37	375	29.333	Q7JMS4
dd_Smed_v6_3045_0_1	fam21c	WASHC2A	WASH complex subunit 2A	3990	1.46158	7.19408	4.06e-06	1.27464	7.19408	7.52e-05	2.75409	2.41938	1.13835	darkblue	PL06019A1G12	0.0614281	6.35624	0.565336	uniform	17,30	Cathepsin+ cell,Intestine	NA	NA	NA	Q641Q2	WASHC2A	WASH complex subunit 2A	8.38e-31	190	37.895	Q6PGL7	Washc2	WASH complex subunit 2	9.73e-32	191	37.696	B8JKJ2	fam21c	Family with sequence similarity 21, member C	7.06e-32	190	36.316	A1ZBW7	CG16742	WASH complex subunit 2	6.66e-08	184	24.457	NA
dd_Smed_v6_30485_0_1	NA	NA	NA	816	3.93689	1.47873	0.000565211	3.76008	1.47873	0.00109816	15.3152	13.5486	1.13039	darkblue	NA	NA	NA	NA	NA	NA	NA	NA	NA	NA	NA	NA	NA	NA	NA	NA	NA	NA	NA	NA	NA	NA	NA	NA	NA	NA	NA	NA	NA	NA	NA	NA	NA	NA	NA
dd_Smed_v6_3049_0_1	NA	HTT	Huntingtin	9028	1.03997	5.23955	0.00058077	1.07698	5.23955	0.000404397	2.05619	2.10962	0.974675	dodgerblue	NA	NA	NA	NA	NA	23	Neural	5	NA	NA	P42858	HTT	Huntingtin	7.33e-56	1019	24.632	P42859	Htt	Huntingtin	3.03e-55	1018	24.46	O42269	htt	Huntingtin	1.27e-38	522	27.969	NA	NA	NA	NA	NA	NA	NA
dd_Smed_v6_3050_0_1	NA	CAB39L	Calcium-binding protein 39-like	1554	1.2523	5.02714	7.43e-06	1.21011	5.02714	1.77e-05	2.38221	2.31356	1.02967	darkblue	Contig3526	0.677838	7.86138	0.00942595	NA	NA	NA	NA	NA	NA	Q9H9S4	CAB39L	Calcium-binding protein 39-like	4.38e-100	349	49.284	Q9DB16	Cab39l	Calcium-binding protein 39-like	5.67e-100	351	49.288	Q5U373	cab39l	Calcium binding protein 39-like	7.12e-103	353	52.691	P91891	Mo25	Protein Mo25	9.66e-95	353	48.725	O18211
dd_Smed_v6_3051_0_1	NA	NA	NA	1833	3.3968	4.25213	7.78e-20	3.26115	4.25213	1.77e-18	10.5327	9.58744	1.09859	darkblue	Contig2047	2.43079	8.15848	0.000181328	NA	10,17,30	Cathepsin+ cell,Intestine	4	NA	NA	NA	NA	NA	NA	NA	NA	NA	NA	NA	NA	NA	NA	NA	NA	NA	NA	NA	NA	NA	NA	NA	NA	NA	NA	NA
dd_Smed_v6_3066_0_1	NA	TMEM41A	Transmembrane protein 41A	1007	4.17175	6.47835	1.06e-38	3.94469	6.47835	2.44e-35	18.0228	15.3982	1.17045	darkblue	Contig4544	1.83346	9.02492	0.000562975	NA	30	Intestine	4	NA	NA	Q96HV5	TMEM41A	Transmembrane protein 41A	2.4e-66	246	46.341	Q9D8U2	Tmem41a	Transmembrane protein 41A	1.34e-65	205	53.171	Q502G2	tmem41aa	Transmembrane protein 41A-A	7.37e-69	234	50	Q9VX39	stas	Transmembrane protein 41 homolog	2.53e-49	243	37.86	NA
dd_Smed_v6_3070_0_1	NA	CD109	CD109 antigen	5302	1.20758	6.55674	1.68e-05	0.764337	6.55674	0.0105061	2.3095	1.69859	1.35966	darkblue	Contig3726	1.01802	9.59036	0.000328484	NA	24,30,33	Epidermal,Intestine,Neural	4	NA	NA	Q6YHK3	CD109	CD109 antigen	2.26e-73	1604	22.943	Q8R422	Cd109	CD109 antigen	1.04e-34	845	23.077	F1QV29	c3a.2	Complement component c3a, duplicate 2	8.54e-14	615	23.415	Q9VLT3	Mcr	LD23292p	9.17e-139	1347	28.285	NA
dd_Smed_v6_3071_0_1	NA	CLCN7	H(+)/Cl(-) exchange transporter 7	2613	3.00339	4.55331	9.69e-17	3.13233	4.55331	6.33e-18	8.01882	8.76851	0.914502	dodgerblue	Contig70	2.28947	8.39781	2.29e-05	NA	30	Intestine	4	NA	NA	P51798	CLCN7	H(+)/Cl(-) exchange transporter 7	7.14e-150	749	46.328	O70496	Clcn7	H(+)/Cl(-) exchange transporter 7	4.42e-158	732	47.131	F1QNP3	clcn7	Chloride channel protein	1.86e-153	727	45.667	Q7JZ25	ClC-b	Chloride channel protein	1.79e-118	699	41.202	G5EC75
dd_Smed_v6_3076_0_1	NA	NA	NA	1030	3.09836	4.41507	2.11e-17	2.95377	4.41507	5.34e-16	8.56445	7.74771	1.10542	darkblue	Contig3355	2.41165	8.40046	2.97e-05	NA	4,10,15,17,28,30,41	Cathepsin+ cell,Intestine	4	NA	NA	NA	NA	NA	NA	NA	NA	NA	NA	NA	NA	NA	NA	NA	NA	NA	NA	NA	NA	NA	NA	NA	NA	NA	NA	NA
dd_Smed_v6_3078_0_1	NA	-	Protein kinase C inhibitor-2	644	1.07206	4.43649	0.00291936	0.91077	4.43649	0.0151	2.10243	1.88005	1.11829	darkblue	Contig1162	0.286461	6.85506	0.078316	NA	NA	NA	NA	NA	NA	Q8WYJ5	-	Protein kinase C inhibitor-2	3.99e-37	113	49.558	Q9D0S9	Hint2	Histidine triad nucleotide-binding protein 2, mitochondrial	4.1e-39	113	52.212	Q642J0	hint1	Histidine triad nucleotide-binding protein 1	1.32e-38	110	51.818	NA	NA	NA	NA	NA	NA	NA
dd_Smed_v6_3084_0_1	NA	GALK2	N-acetylgalactosamine kinase	1488	1.83208	3.25343	0.00251763	1.97976	3.25343	0.00118497	3.5605	3.94427	0.902701	dodgerblue	PL06020A2H10	0.432159	9.18534	0.131541	NA	NA	NA	NA	NA	NA	Q01415	GALK2	N-acetylgalactosamine kinase	4.94e-110	431	46.172	Q68FH4	Galk2	N-acetylgalactosamine kinase	4e-113	427	47.073	NA	NA	NA	NA	NA	NA	Q95U34	Galk	GH11113p	1.47e-92	472	37.924	NA
dd_Smed_v6_309_0_1	NA	NA	NA	962	1.08561	9.34307	0.000614992	1.19676	9.34307	0.000163489	2.12227	2.29224	0.92585	dodgerblue	Contig260	1.78908	9.20531	0.000162171	NA	2,11,17,18,20,24,29,30,34,39,41	Epidermal,Cathepsin+ cell,Neural,Protonephridia,Intestine	4,5	cav-1+ neurons,muscle body,early epidermal progenitors,late epidermal progenitors 2,late epidermal progenitors 1,epidermis,protonephridia,phagocytes,aqp+ parenchymal cells,ldlrr-1+ parenchymal cells,psap+ parenchymal cells	NA	NA	NA	NA	NA	NA	NA	NA	NA	NA	NA	NA	NA	NA	NA	NA	NA	NA	NA	NA	NA	NA	NA	NA	NA	NA
dd_Smed_v6_3096_0_1	NA	CMTM8	CKLF-like MARVEL transmembrane domain-containing protein 8	977	2.15749	3.3006	6.21e-07	2.20303	3.3006	4.13e-07	4.46139	4.60446	0.968927	dodgerblue	Contig2990	0.847836	8.97613	0.000358733	NA	12,18,20,21,23,33,38	Parapharyngeal,Neural	4	NA	NA	Q8IZV2	CMTM8	CKLF-like MARVEL transmembrane domain-containing protein 8	0.000351	98	28.571	NA	NA	NA	NA	NA	NA	NA	NA	NA	NA	NA	NA	NA	NA	NA	NA	NA	NA	NA
dd_Smed_v6_3097_0_1	NA	TRAF5	TNF receptor-associated factor 5	2069	6.02582	6.22977	7.04e-55	5.87394	6.22977	8.23e-53	65.1556	58.6452	1.11101	darkblue	PL06023A1F09	0.389049	6.44993	0.0316421	NA	19,30,35	Intestine,Epidermal	5,7	NA	NA	O00463	TRAF5	TNF receptor-associated factor 5	7.26e-29	413	24.939	P70191	Traf5	TNF receptor-associated factor 5	2.59e-26	365	23.562	Q6IWL4	traf6	TNF receptor-associated factor 6	1.86e-21	485	21.031	Q9UAC5	Traf4	TRAF1	2e-18	155	31.613	G5EG80
dd_Smed_v6_31_0_1	ct14378	CPA6	Carboxypeptidase A6	422	6.68488	8.695	1.33e-18	7.3875	8.695	3.49e-21	102.885	167.44	0.614454	orange	Contig828	-0.695796	11.5073	0.00980635	goblet	19	Intestine	5,8	goblet cells	NA	Q8N4T0	CPA6	Carboxypeptidase A6	0.001	81	29.63	NA	NA	NA	NA	NA	NA	Q6PHV5	cpa5	Carboxypeptidase A5	2.44e-06	103	32.039	Q961J8	CT14378	CG8560, isoform A	2.88e-10	95	33.684	NA
dd_Smed_v6_3101_0_1	ank1	ANK1	Ankyrin-1	783	4.282	5.35318	2.61e-23	4.98125	5.35318	2.04e-29	19.454	31.5868	0.615891	orange	Contig6287	-0.431702	7.91021	0.0383816	basal	19	Intestine	2,5	NA	NA	P16157	ANK1	Ankyrin-1	1.54e-15	116	29.31	Q02357	Ank1	Ankyrin-1	1.34e-15	116	29.31	Q6PHD6	ilk	Integrin linked kinase	1.82e-14	131	30.534	Q8SWY2	Ank2	GH01626p	5.28e-15	122	31.148	Q7JNZ0
dd_Smed_v6_3106_0_1	cyp3a13	CYP3A4	Cytochrome P450 3A4	1956	4.19331	6.18026	3.59e-38	4.22044	6.18026	1.51e-38	18.2941	18.6414	0.98137	dodgerblue	PL06016A2C01	0.643547	6.99509	0.124139	uniform	6,19,30,42	Intestine,Cathepsin+ cell	4,7	NA	NA	P08684	CYP3A4	Cytochrome P450 3A4	4.61e-72	534	29.401	Q64464	Cyp3a13	Cytochrome P450 3A13	8.97e-74	533	30.582	Q5VI44	cyp3a65	Cytochrome P450 3A65	4e-65	538	28.439	P33270	Cyp6a2	Cytochrome P450 6a2	3.18e-52	544	28.309	Q27518
dd_Smed_v6_3108_0_1	NA	NA	NA	695	5.03308	5.42835	3.16e-50	4.89733	5.42835	4e-48	32.7423	29.8018	1.09867	darkblue	NA	NA	NA	NA	NA	6,27,30,37	Intestine,Pharynx	4	NA	NA	NA	NA	NA	NA	NA	NA	NA	NA	NA	NA	NA	NA	NA	NA	NA	NA	NA	NA	NA	NA	NA	NA	NA	NA	NA
dd_Smed_v6_3125_0_1	NA	CLN5	Ceroid-lipofuscinosis neuronal protein 5	1075	6.47803	6.05236	3.42e-50	6.62949	6.05236	7.74e-52	89.1418	99.0093	0.900338	dodgerblue	Contig2216	3.09375	9.32094	2.67e-05	NA	30	Intestine	4	NA	NA	O75503	CLN5	Ceroid-lipofuscinosis neuronal protein 5	2.89e-94	301	48.173	Q3UMW8	Cln5	Ceroid-lipofuscinosis neuronal protein 5 homolog	3e-95	301	47.841	E7F6N2	cln5	Ceroid-lipofuscinosis, neuronal 5	3.29e-90	314	41.72	NA	NA	NA	NA	NA	NA	NA
dd_Smed_v6_3128_0_1	NA	PCTK1	PCTK1 protein	2459	1.14694	5.0963	0.000168135	0.696786	5.0963	0.0353762	2.21443	1.62089	1.36618	darkblue	NA	NA	NA	NA	NA	17,27,28,29	Cathepsin+ cell,Pharynx,Protonephridia	NA	NA	NA	Q9BRL4	PCTK1	PCTK1 protein	6.53e-68	325	45.846	Q04735	Cdk16	Cyclin-dependent kinase 16	1.76e-66	325	45.846	E7F9R5	si:dkey-166c18.1	Si:dkey-166c18.1	3.52e-66	308	48.052	Q8MZ44	Eip63E	LD27880p	6.46e-52	232	48.276	Q8I7M8
dd_Smed_v6_3131_0_1	NA	MBOAT2	Lysophospholipid acyltransferase 2	1729	1.11702	4.88119	0.000578756	1.09153	4.88119	0.000902557	2.16898	2.13101	1.01782	darkblue	NA	NA	NA	NA	NA	6	Intestine	0	NA	NA	Q6ZWT7	MBOAT2	Lysophospholipid acyltransferase 2	1.04e-83	445	36.854	Q8R3I2	Mboat2	Lysophospholipid acyltransferase 2	2.66e-82	461	35.575	A0A0R4IJL5	mboat2b	Membrane-bound O-acyltransferase domain-containing 2b	2.29e-85	461	34.707	Q6NN55	oys	Oysgedart, isoform A	3.47e-92	483	34.576	O01925
dd_Smed_v6_3132_0_1	NA	NA	NA	1455	2.14483	4.0719	1.06e-06	2.11776	4.0719	1.69e-06	4.42241	4.34019	1.01894	darkblue	Contig5000	1.09295	7.98004	0.000313658	NA	4,6,10,15,17,19,28,30,39	Cathepsin+ cell,Intestine	NA	NA	NA	NA	NA	NA	NA	NA	NA	NA	NA	NA	NA	NA	NA	NA	NA	NA	NA	NA	NA	NA	NA	NA	NA	NA	NA	NA
dd_Smed_v6_3136_0_1	NA	PIKFYVE	1-phosphatidylinositol 3-phosphate 5-kinase	6349	2.11193	5.2389	6.96e-11	1.8056	5.2389	2.99e-08	4.3227	3.49575	1.23656	darkblue	PL06022A2H11	0.237455	6.16224	0.0800453	NA	6,10,15,17,19	Intestine,Cathepsin+ cell	7	NA	Cathepsin+ b	Q9Y2I7	PIKFYVE	1-phosphatidylinositol 3-phosphate 5-kinase	1.49e-68	530	32.264	Q9Z1T6	Pikfyve	1-phosphatidylinositol 3-phosphate 5-kinase	3.45e-67	530	32.453	Q7SZQ5	pikfyve	Pip5k3 protein	1.54e-67	508	31.89	O96838	fab1	Putative 1-phosphatidylinositol 3-phosphate 5-kinase	2.89e-46	253	39.13	G5ED98
dd_Smed_v6_3137_0_1	NA	CERS1	Ceramide synthase 1	1811	1.93334	6.2083	1.36e-11	1.91704	6.2083	2.36e-11	3.81938	3.77647	1.01136	darkblue	Contig2269	0.648924	8.45857	0.00375035	NA	NA	NA	NA	NA	NA	P27544	CERS1	Ceramide synthase 1	2.5e-44	350	33.143	P27545	Cers1	Ceramide synthase 1	1.12e-47	352	31.25	F1Q5B1	cers1	Ceramide synthase 1	6.25e-52	304	37.829	Q9W423	schlank	LD18904p	1.76e-13	210	29.524	Q9XWE9
dd_Smed_v6_314_0_1	NA	NA	NA	389	7.60883	9.10921	1.06e-48	7.00661	9.10921	1.48e-43	195.202	128.588	1.51805	green	Contig2793	-1.31039	10.8542	0.000915319	NA	NA	NA	5,8	goblet cells	NA	NA	NA	NA	NA	NA	NA	NA	NA	NA	NA	NA	NA	NA	NA	NA	NA	NA	NA	NA	NA	NA	NA	NA	NA	NA
dd_Smed_v6_3144_0_1	NA	COX11	Cytochrome c oxidase assembly protein COX11, mitochondrial	953	1.09627	5.20379	0.00137468	0.743558	5.20379	0.0440418	2.13802	1.6743	1.27696	darkblue	Contig2385	-0.119099	8.51987	0.394191	NA	NA	NA	NA	NA	NA	Q9Y6N1	COX11	Cytochrome c oxidase assembly protein COX11, mitochondrial	5.9e-73	204	50	Q6P8I6	Cox11	Cytochrome c oxidase assembly protein COX11, mitochondrial	1.19e-72	187	52.941	NA	NA	NA	NA	NA	NA	Q9VMQ6	CG31648	RE57459p	3.6e-68	187	51.337	NA
dd_Smed_v6_3145_0_1	NA	NA	NA	977	1.31447	4.04097	0.000179239	1.05582	4.04097	0.0036607	2.4871	2.07891	1.19635	darkblue	Contig1623	0.863359	7.37403	0.000358757	NA	NA	NA	NA	NA	NA	NA	NA	NA	NA	NA	NA	NA	NA	NA	NA	NA	NA	NA	NA	NA	NA	NA	NA	NA	NA	NA	NA	NA	NA	NA
dd_Smed_v6_3148_0_1	NA	EHD1	EH domain-containing protein 1	2099	1.97179	7.67244	2.73e-10	2.04514	7.67244	6.97e-11	3.92254	4.12712	0.950429	dodgerblue	Contig4857	1.76129	8.22725	6.09e-05	NA	15,17,30	Cathepsin+ cell,Intestine	4	NA	Cathepsin+ b	A0A024R571	EHD1	EH domain-containing protein 1	0	525	64	Q9WVK4	Ehd1	EH domain-containing protein 1	0	525	64	Q6NY81	ehd1a	EH-domain-containing 1a	0	522	64.559	Q8T8W3	Past1	AT21416p	0	523	66.922	Q9N5B7
dd_Smed_v6_3153_0_1	NA	SPG20	Spartin	1673	1.99981	5.95514	1.39e-12	1.96064	5.95514	4.37e-12	3.99947	3.89233	1.02753	darkblue	NA	NA	NA	NA	NA	17	Cathepsin+ cell	4	NA	NA	Q8N0X7	SPG20	Spartin	1.44e-09	235	24.681	Q8R1X6	Spg20	Spartin	6.77e-11	222	26.577	A8WFZ3	spg20a	Spastic paraplegia 20a (Troyer syndrome)	3.36e-28	385	29.61	Q9VN45	spartin	Protein spartin	4.36e-11	308	24.675	NA
dd_Smed_v6_3154_0_1	NA	AGXT2	Alanine--glyoxylate aminotransferase 2, mitochondrial	1522	1.0005	5.0304	0.0178553	1.09585	5.0304	0.00987025	2.0007	2.13738	0.93605	dodgerblue	PL05005A1D08	0.0993387	7.4464	0.601031	NA	10,31	Cathepsin+ cell	NA	NA	NA	Q9BYV1	AGXT2	Alanine--glyoxylate aminotransferase 2, mitochondrial	0	460	54.783	Q3UEG6	Agxt2	Alanine--glyoxylate aminotransferase 2, mitochondrial	0	460	54.783	Q7SY54	etnppl	Ethanolamine-phosphate phospho-lyase	2.58e-98	456	37.939	A8E6R2	Dmel\CG11241	IP18034p	0	459	57.081	O02158
dd_Smed_v6_3157_0_1	NA	COMMD2	COMM domain-containing protein 2	851	1.57699	5.14583	1.88e-07	1.35785	5.14583	9.52e-06	2.98347	2.56303	1.16404	darkblue	Contig2201	1.14441	7.9015	0.00105756	NA	17	Cathepsin+ cell	NA	NA	NA	Q86X83	COMMD2	COMM domain-containing protein 2	5.8e-15	204	26.471	Q8BXC6	Commd2	COMM domain-containing protein 2	6.89e-13	212	26.887	Q6DH33	commd2	COMM domain containing 2	1.56e-16	179	30.726	NA	NA	NA	NA	NA	NA	NA
dd_Smed_v6_3160_0_1	NA	ACADS	Short-chain specific acyl-CoA dehydrogenase, mitochondrial	1422	2.29755	5.33654	5.1e-10	2.36114	5.33654	2.02e-10	4.91622	5.13777	0.956877	dodgerblue	Contig4610	1.18869	8.20151	0.000134454	NA	NA	NA	NA	NA	NA	P16219	ACADS	Short-chain specific acyl-CoA dehydrogenase, mitochondrial	1.9e-57	385	32.468	Q07417	Acads	Short-chain specific acyl-CoA dehydrogenase, mitochondrial	8.95e-58	385	31.429	Q6NWF0	zgc:85777	Zgc:85777	6.73e-167	383	61.619	Q9VDT1	Arc42	Arc42	3.76e-52	374	30.481	H2KZG6
dd_Smed_v6_3164_0_1	NA	RAB14	Ras-related protein Rab-14	1390	1.46955	4.77532	3.55e-06	1.10432	4.77532	0.000712639	2.76935	2.14998	1.28808	darkblue	Contig3296	0.91047	9.58904	0.000665505	NA	17,24	Cathepsin+ cell,Epidermal	NA	NA	NA	P61106	RAB14	Ras-related protein Rab-14	3.09e-105	208	68.75	Q91V41	Rab14	Ras-related protein Rab-14	3.4e-105	208	68.75	Q7ZVX4	rab14	RAB14, member RAS oncogene family	6.83e-107	210	70	O18336	Rab14	MIP20481p	6.52e-102	209	66.507	Q93874
dd_Smed_v6_3165_0_1	NA	ABHD4	Protein ABHD4	1382	1.91227	5.88821	1.22e-12	2.02061	5.88821	7.1e-14	3.76401	4.05754	0.927658	dodgerblue	Contig5428	1.45946	7.54322	0.000180531	NA	30	Intestine	4	NA	NA	Q8TB40	ABHD4	Protein ABHD4	7.47e-81	366	39.071	Q9DBL9	Abhd5	1-acylglycerol-3-phosphate O-acyltransferase ABHD5	8.36e-73	346	39.595	NA	NA	NA	NA	NA	NA	Q5U191	CG1882	CG1882, isoform A	3.66e-71	363	37.19	O02218
dd_Smed_v6_3174_0_1	NA	MLST8	Target of rapamycin complex subunit LST8	1231	1.82199	3.47135	0.000734677	1.44405	3.47135	0.00996048	3.53569	2.72084	1.29948	darkblue	Contig1647	0.551658	7.85809	0.00500507	NA	NA	NA	NA	NA	NA	Q9BVC4	MLST8	Target of rapamycin complex subunit LST8	4.92e-81	314	39.172	Q9DCJ1	Mlst8	Target of rapamycin complex subunit LST8	1.27e-80	314	38.854	Q803V5	mlst8	Target of rapamycin complex subunit lst8	6.16e-82	314	38.854	Q9W328	Lst8	Protein LST8 homolog	5.44e-63	311	37.299	E5QCF5
dd_Smed_v6_3179_0_1	NA	OSBPL2	Oxysterol-binding protein-related protein 2	1712	1.92322	6.21156	2.69e-12	1.87025	6.21156	1.24e-11	3.7927	3.65596	1.0374	darkblue	Contig7473	1.74017	8.00935	0.00128285	NA	27,30,38	Pharynx,Intestine,Parapharyngeal	4	NA	NA	Q9H1P3	OSBPL2	Oxysterol-binding protein-related protein 2	1.81e-118	458	44.76	Q8BX94	Osbpl2	Oxysterol-binding protein-related protein 2	1.76e-119	453	44.592	Q1LW95	osbpl3a	Oxysterol-binding protein	1.03e-66	396	36.364	Q9VC05	Osbp	Oxysterol-binding protein	3.12e-56	367	34.877	G5EC19
dd_Smed_v6_3189_0_1	NA	WASF1	Wiskott-Aldrich syndrome protein family member 1	1840	1.26134	5.21629	2.33e-05	1.22352	5.21629	4.82e-05	2.39719	2.33516	1.02656	darkblue	Contig6279	0.270767	6.77922	0.0890146	NA	10,17,28	Cathepsin+ cell	NA	NA	NA	Q92558	WASF1	Wiskott-Aldrich syndrome protein family member 1	7.77e-31	170	37.647	Q8R5H6	Wasf1	Wiskott-Aldrich syndrome protein family member 1	8.87e-31	170	37.647	E7EXR7	nhsl1b	NHS-like 1b	0.000161	180	24.444	M9PCP4	SCAR	SCAR, isoform E	3.86e-35	173	41.618	Q9XVK6
dd_Smed_v6_3194_0_1	NA	STK24	Epididymis secretory protein Li 95	2682	3.24763	4.26903	3.96e-11	2.96364	4.26903	1.57e-09	9.49807	7.80092	1.21756	darkblue	Contig5773	0.349518	6.08438	0.0519304	NA	30	Intestine	4	NA	NA	Q5U0E6	STK24	Epididymis secretory protein Li 95	6.02e-34	214	38.785	Q99KH8	Stk24	Serine/threonine-protein kinase 24	3.58e-33	214	38.318	A0A0R4IN78	stk24b	Serine/threonine kinase 24b (STE20 homolog, yeast)	8.72e-34	214	38.785	Q9VEN3	GckIII	FI20177p1	5.84e-33	259	32.819	H2L099
dd_Smed_v6_3195_0_1	NA	NA	NA	3675	1.03042	5.66959	6.77e-05	0.746816	5.66959	0.00593487	2.04263	1.67809	1.21724	darkblue	PL05003A1B03	1.07523	6.6216	0.00213326	NA	27,29	Pharynx,Protonephridia	NA	NA	NA	NA	NA	NA	NA	NA	NA	NA	NA	NA	NA	NA	NA	NA	NA	NA	NA	NA	NA	NA	NA	NA	NA	NA	NA	NA
dd_Smed_v6_32_0_1	NA	NA	NA	611	3.69546	11.8691	4.08e-29	3.60861	11.8691	5.76e-28	12.9552	12.1983	1.06204	darkblue	Contig3429	3.70015	13.649	2.29e-05	NA	10,17,19,28,30,31	Cathepsin+ cell,Intestine	4,5,7	phagocytes,pigment,ldlrr-1+ parenchymal cells,psap+ parenchymal cells,goblet cells	NA	NA	NA	NA	NA	NA	NA	NA	NA	NA	NA	NA	NA	Q66I68	cnfn	Cornifelin homolog	8.99e-05	76	35.526	NA	NA	NA	NA	NA	NA	NA
dd_Smed_v6_3200_0_1	NA	NA	NA	806	2.47107	5.40113	3.14e-18	1.90741	5.40113	1.68e-11	5.54456	3.75134	1.47802	darkblue	Contig3280	1.68879	8.27143	0.000122228	NA	17,30	Cathepsin+ cell,Intestine	4	NA	NA	NA	NA	NA	NA	NA	NA	NA	NA	NA	NA	NA	NA	NA	NA	NA	NA	NA	NA	NA	NA	NA	NA	NA	NA	NA
dd_Smed_v6_3205_0_1	NA	EHD4	EH domain-containing protein 4	1982	1.59263	7.08244	1.84e-09	1.35598	7.08244	4.23e-07	3.01598	2.55971	1.17825	darkblue	NA	NA	NA	NA	NA	17,20,30	Cathepsin+ cell,Neural,Intestine	4	NA	NA	Q9H223	EHD4	EH domain-containing protein 4	0	514	57.004	Q9EQP2	Ehd4	EH domain-containing protein 4	0	514	57.004	Q66HW2	ehd1b	EH-domain containing 1	0	523	55.067	Q8T6I0	Past1	EH domain containing protein	0	529	57.845	Q9N5B7
dd_Smed_v6_3208_0_1	NA	CLIC4	Chloride intracellular channel protein 4	1038	3.99001	5.30463	2.38e-28	3.97832	5.30463	3.56e-28	15.8896	15.7614	1.00813	darkblue	Contig3691	2.06945	8.20385	8.54e-05	NA	30	Intestine	4	NA	NA	Q9Y696	CLIC4	Chloride intracellular channel protein 4	1.16e-14	241	24.481	Q9QYB1	Clic4	Chloride intracellular channel protein 4	4.38e-15	241	24.481	F1QTI1	clic2	Chloride intracellular channel protein	1.22e-15	235	26.383	Q9VY78	Clic	Chloride intracellular channel, isoform A	1.76e-28	255	32.549	Q8WQA4
dd_Smed_v6_3209_0_1	NA	MANBA	Beta-mannosidase	3229	2.93479	4.94239	5.15e-23	2.6611	4.94239	2.32e-19	7.64647	6.32514	1.2089	darkblue	PL06005A1E03	0.339658	6.37036	0.0412143	NA	17,28,30	Cathepsin+ cell,Intestine	NA	NA	Cathepsin+ b	O00462	MANBA	Beta-mannosidase	1.14e-124	842	32.66	Q8K2I4	Manba	Beta-mannosidase	2.8e-126	844	33.057	NA	NA	NA	NA	NA	NA	A0A0B4LGY4	CG15117	Beta-glucuronidase	8.86e-06	187	24.064	Q95Q32
dd_Smed_v6_3212_0_1	NA	EFR3B	Protein EFR3 homolog B	3083	1.18009	4.0536	0.00294586	1.22634	4.0536	0.00220155	2.26591	2.33972	0.968452	dodgerblue	PL05006A2G12	0.560726	6.55029	0.0225922	NA	8,13,23	Neural,Muscle	NA	NA	NA	Q9Y2G0	EFR3B	Protein EFR3 homolog B	1.12e-127	697	34.29	Q6ZQ18	Efr3b	Protein EFR3 homolog B	6.8e-125	698	33.811	F1QUE0	efr3a	EFR3 homolog A (S. cerevisiae)	3.97e-127	710	32.817	Q8IGJ0	stmA	Protein EFR3 homolog cmp44E	5.74e-106	844	28.436	NA
dd_Smed_v6_3217_0_1	NA	PYCR3	Pyrroline-5-carboxylate reductase 3	1058	1.42205	4.99968	9.63e-06	1.45763	4.99968	6.43e-06	2.67967	2.74656	0.975644	dodgerblue	Contig1084	-0.12912	7.32256	0.360793	NA	10,15	Cathepsin+ cell	7	NA	NA	Q53H96	PYCR3	Pyrroline-5-carboxylate reductase 3	2.35e-32	230	31.739	Q9DCC4	Pycr3	Pyrroline-5-carboxylate reductase 3	5.05e-29	234	29.487	Q5SPD7	pycr3	Pyrroline-5-carboxylate reductase 3	1.44e-36	247	35.223	NA	NA	NA	NA	NA	NA	NA
dd_Smed_v6_3236_0_1	NA	SLC30A3	Zinc transporter 3	1373	1.63563	4.85348	2.93e-07	1.28167	4.85348	8.14e-05	3.10724	2.43121	1.27806	darkblue	Contig3522	1.14338	7.48152	0.00115356	NA	10	Cathepsin+ cell	NA	NA	NA	Q99726	SLC30A3	Zinc transporter 3	5.38e-78	365	36.164	Q2HJ10	Slc30a2	Zinc transporter 2	4.48e-82	362	40.608	A0A0R4IFM6	slc30a8	Solute carrier family 30 (zinc transporter), member 8	3.23e-87	391	39.898	Q9VKA3	ZnT33D	Zinc transporter 33D, isoform B	5.76e-76	377	40.584	Q22541
dd_Smed_v6_324_0_1	NA	NA	NA	1663	5.91773	8.7609	5.13e-67	5.78728	8.7609	1.03e-64	60.4526	55.2261	1.09464	darkblue	Contig819	3.13504	9.67015	2.53e-05	NA	30	Intestine	4	phagocytes	NA	NA	NA	NA	NA	NA	NA	NA	NA	NA	NA	NA	NA	NA	NA	NA	NA	NA	NA	NA	NA	NA	NA	NA	NA	NA
dd_Smed_v6_3252_0_1	NA	SLC16A12	Monocarboxylate transporter 12	1523	3.37344	4.99863	1.63e-22	3.33956	4.99863	4.39e-22	10.3635	10.1229	1.02376	darkblue	Contig4237	2.37556	9.34325	2.33e-05	NA	10,30	Cathepsin+ cell,Intestine	4	NA	NA	Q6ZSM3	SLC16A12	Monocarboxylate transporter 12	1.85e-09	203	25.123	Q8R0M8	Slc16a4	Monocarboxylate transporter 5	1.87e-07	169	27.219	E7F9C2	slc16a13	Solute carrier family 16, member 13 (monocarboxylic acid transporter 13)	3.36e-07	333	24.024	Q5U154	Sln	RE01051p	2.96e-06	200	26.5	NA
dd_Smed_v6_3254_1_1	novel	NA	NA	604	3.19932	6.70321	9.76e-28	3.34552	6.70321	7.39e-30	9.18527	10.1649	0.903625	dodgerblue	Contig112	1.34858	8.25248	0.0012623	uniform	19,30	Intestine	NA	NA	NA	NA	NA	NA	NA	NA	NA	NA	NA	NA	NA	NA	NA	NA	NA	NA	NA	NA	NA	NA	NA	NA	NA	NA	NA	NA
dd_Smed_v6_3267_0_1	NA	RAB10	Ras-related protein Rab-10	665	0.691572	3.65917	0.210903	1.39946	3.65917	0.0055844	1.61504	2.63803	0.612214	orange	Contig2183	0.485865	7.58271	0.0154288	NA	17	Cathepsin+ cell	NA	NA	NA	P61026	RAB10	Ras-related protein Rab-10	4.83e-47	142	54.93	P61027	Rab10	Ras-related protein Rab-10	5.32e-47	142	54.93	Q6DGV5	rab10	RAB10, member RAS oncogene family	2.74e-48	142	56.338	O15971	Rab10	LD39986p	1.23e-46	112	66.071	Q94148
dd_Smed_v6_3268_0_1	NA	OSBP2	Oxysterol-binding protein 2	3910	1.53029	4.83998	8.61e-06	1.5352	4.83998	9.23e-06	2.88843	2.89828	0.996603	dodgerblue	Contig4553	0.886488	7.50527	0.00140683	NA	13,25,28,29	Muscle,Pharynx,Cathepsin+ cell,Protonephridia	NA	NA	NA	Q969R2	OSBP2	Oxysterol-binding protein 2	3.7e-138	422	55.213	Q5QNQ6	Osbp2	Oxysterol-binding protein 2	5.46e-138	432	52.083	Q66L55	osbpl3a	Oxysterol-binding protein	6.37e-70	331	41.994	Q9VC05	Osbp	Oxysterol-binding protein	1.89e-135	392	57.398	Q8MPR9
dd_Smed_v6_32686_0_1	NA	NA	NA	516	6.14322	1.47653	1.04e-07	6.78102	1.47653	8.69e-09	70.6794	109.974	0.642691	orange	NA	NA	NA	NA	NA	NA	NA	NA	NA	NA	NA	NA	NA	NA	NA	NA	NA	NA	NA	NA	NA	NA	NA	NA	NA	NA	NA	NA	Q8I7P9	pol	Retrovirus-related Pol polyprotein from transposon opus	3.38e-21	166	36.145	NA
dd_Smed_v6_3270_0_1	NA	ACOX3	Peroxisomal acyl-coenzyme A oxidase 3	2095	1.61866	3.70708	0.000224783	1.41511	3.70708	0.00161168	3.07089	2.66679	1.15153	darkblue	Contig4735	0.744245	8.05646	0.00575974	NA	NA	NA	NA	NA	NA	O15254	ACOX3	Peroxisomal acyl-coenzyme A oxidase 3	1.13e-73	403	34.988	Q9EPL9	Acox3	Peroxisomal acyl-coenzyme A oxidase 3	4.62e-78	421	36.342	F1QXK3	acox3	Acyl-coenzyme A oxidase	2.1e-76	441	32.88	Q8SYT1	CG9527	Acyl-coenzyme A oxidase	9.5e-59	628	26.911	Q20992
dd_Smed_v6_3273_0_1	NA	EPG5	Ectopic P granules protein 5 homolog	7534	1.08092	5.60815	0.000650493	0.922855	5.60815	0.0048133	2.11539	1.89586	1.11579	darkblue	Contig4471	1.07729	7.58399	0.00104291	NA	24	Epidermal	NA	NA	NA	Q9HCE0	EPG5	Ectopic P granules protein 5 homolog	1.66e-99	2443	21.449	Q80TA9	Epg5	Ectopic P granules protein 5 homolog	4.37e-103	2432	21.423	A5WUT8	epg5	Ectopic P granules protein 5 homolog	4.47e-98	2434	21.693	Q9VE34	CG14299	Ectopic P granules protein 5 homolog	2.67e-68	1782	22.278	Q18892
dd_Smed_v6_3277_0_1	NA	ANK1	Ankyrin-1	3043	2.07436	6.17319	6e-09	1.88872	6.17319	1.42e-07	4.21159	3.70306	1.13733	darkblue	Contig1190	1.51573	7.09942	0.000411435	NA	10,30,39	Cathepsin+ cell,Intestine	4	NA	NA	P16157	ANK1	Ankyrin-1	1.04e-23	204	28.431	G5E8K5	Ank3	Ankyrin-3	7.48e-23	174	32.759	A2BIB9	ank2b	Ankyrin 2b, neuronal	2.81e-21	166	31.325	A8JNM4	Ank2	Ankyrin 2, isoform G	6.1e-22	166	30.12	Q7JNZ0
dd_Smed_v6_3286_0_1	NA	MAP3K2	Mitogen-activated protein kinase kinase kinase 2	2477	1.2024	4.72077	0.000124128	1.08548	4.72077	0.000678591	2.30122	2.12208	1.08442	darkblue	PL030015A10E04	0.305329	6.3516	0.166335	NA	10,13,17,23,29,31,39,40,41	Cathepsin+ cell,Muscle,Neural,Protonephridia	NA	NA	NA	Q9Y2U5	MAP3K2	Mitogen-activated protein kinase kinase kinase 2	4.32e-34	260	33.462	Q61083	Map3k2	Mitogen-activated protein kinase kinase kinase 2	4.63e-34	260	33.846	E7EXX1	map3k3	Mitogen-activated protein kinase kinase kinase 3	3.3e-35	275	33.091	Q9VXE5	mbt	Serine/threonine-protein kinase PAK mbt	3.27e-33	269	32.714	Q17850
dd_Smed_v6_329_0_1	NA	CTSD	Cathepsin D	1396	3.13978	9.87446	5.2e-22	2.91325	9.87446	2.41e-19	8.81387	7.53312	1.17002	darkblue	Contig337	3.54421	11.8981	2.29e-05	NA	10,15,17,24,28,30,31,39,41	Cathepsin+ cell,Epidermal,Intestine	4	phagocytes,pigment,psap+ parenchymal cells	Gut	P07339	CTSD	Cathepsin D	8.43e-125	387	50.904	P18242	Ctsd	Cathepsin D	1.32e-122	386	50.259	Q1L9E4	ctsd	Cathepsin D	1.24e-119	397	46.348	Q7K485	cathD	CathD	1.38e-140	367	56.403	Q21966
dd_Smed_v6_33_0_1	NA	SFTPA2	Pulmonary surfactant-associated protein A2	211	5.53736	9.58325	8.5e-40	5.46784	9.58325	4.94e-39	46.4422	44.2571	1.04937	darkblue	Contig3767	-0.246112	10.6584	0.355907	no_signal	NA	NA	5	NA	NA	Q8IWL1	SFTPA2	Pulmonary surfactant-associated protein A2	4.78e-06	43	48.837	P50404	Sftpd	Pulmonary surfactant-associated protein D	1.72e-06	44	45.455	F1RBU9	hbl4	Hexose-binding lectin 4	4.35e-07	44	43.182	NA	NA	NA	NA	NA	NA	NA
dd_Smed_v6_3308_0_1	NA	CDA	Cytidine deaminase	610	4.44957	4.00792	1.27e-07	4.72182	4.00792	3.25e-08	21.8501	26.3881	0.828029	dodgerblue	Contig2152	-0.524642	8.03133	0.0182089	NA	4,10,19	Cathepsin+ cell,Intestine	2,5	NA	NA	P32320	CDA	Cytidine deaminase	1.27e-32	138	42.029	P56389	Cda	Cytidine deaminase	7.72e-34	136	42.647	Q6P0R4	cda	Cytidine deaminase	3.51e-31	134	44.776	Q9VLR3	CG8360	Cytidine deaminase	2.86e-28	138	43.478	Q20628
dd_Smed_v6_3309_0_1	NA	-	cDNA FLJ77654, highly similar to Homo sapiens guanine nucleotide binding protein (G protein), beta polypeptide 4 (GNB4), mRNA	1744	2.60121	3.55231	3.2e-11	2.20472	3.55231	2.02e-08	6.06796	4.60984	1.31631	darkblue	Contig3938	1.28548	8.93058	7.81e-05	NA	8,9,18,27,30,37	Neural,Pharynx,Intestine	NA	NA	NA	A8K3F6	-	cDNA FLJ77654, highly similar to Homo sapiens guanine nucleotide binding protein (G protein), beta polypeptide 4 (GNB4), mRNA	4.96e-109	341	45.748	P62880	Gnb2	Guanine nucleotide-binding protein G(I)/G(S)/G(T) subunit beta-2	1.99e-106	341	44.868	Q6PH57	gnb1	Guanine nucleotide-binding protein G(I)/G(S)/G(T) subunit beta-1	6.12e-109	341	45.455	P26308	Gbeta13F	Guanine nucleotide-binding protein subunit beta-1	5.28e-107	340	45.882	P17343
dd_Smed_v6_33178_0_1	NA	NA	NA	519	7.29263	1.24982	3.38e-06	7.73648	1.24982	1.31e-06	156.784	213.261	0.735172	dodgerblue	NA	NA	NA	NA	NA	NA	NA	NA	NA	NA	NA	NA	NA	NA	NA	NA	NA	NA	NA	NA	NA	NA	NA	NA	NA	NA	NA	NA	NA	NA	NA	NA	NA	NA	NA
dd_Smed_v6_3324_0_1	inhbab	-	Putative uncharacterized protein	1778	3.59139	6.21119	2.39e-32	3.30743	6.21119	3.67e-28	12.0536	9.90003	1.21753	darkblue	Contig285	0.188499	6.6774	0.463998	uniform; pharynx	10	Cathepsin+ cell	7	NA	NA	Q9HBP0	-	Putative uncharacterized protein	2.91e-13	104	30.769	Q04998	Inhba	Inhibin beta A chain	3.49e-13	104	30.769	B0S4U4	inhbab	Inhibin, beta Ab	1.5e-13	114	28.947	O61643	Actbeta	Inhibin beta chain	2.58e-11	90	33.333	P92172
dd_Smed_v6_3338_0_1	NA	ACP2	Lysosomal acid phosphatase	1375	3.18974	4.9566	3.09e-16	3.10185	4.9566	1.92e-15	9.12447	8.58517	1.06282	darkblue	NA	NA	NA	NA	NA	10,15,17,28,30	Cathepsin+ cell,Intestine	4	NA	Cathepsin+ b	P11117	ACP2	Lysosomal acid phosphatase	5.63e-62	355	35.493	P24638	Acp2	Lysosomal acid phosphatase	2.47e-63	363	35.262	A8WG92	acp6	Acid phosphatase 6, lysophosphatidic	2.09e-08	109	31.193	Q8I0P9	Acph-1	Acid phosphatase 1, isoform B	1.62e-48	344	32.849	Q19076
dd_Smed_v6_3344_0_1	NA	TMEM189	Transmembrane protein 189	1583	1.05098	6.01526	0.000314839	1.12944	6.01526	0.000113665	2.07194	2.18774	0.947066	dodgerblue	Contig6417	0.795223	8.03022	0.0199071	NA	NA	NA	NA	NA	NA	A5PLL7	TMEM189	Transmembrane protein 189	1.33e-101	248	58.871	Q99LQ7	Tmem189	Transmembrane protein 189	2.91e-100	259	55.598	F1RDM1	si:ch211-212o1.2	Si:ch211-212o1.2	2.38e-100	249	57.028	Q9V3B5	Kua	FI14826p	2.29e-98	248	57.258	Q9XW52
dd_Smed_v6_335_0_1	NA	CS	Citrate synthase, mitochondrial	2289	1.78072	10.7563	9.56e-08	1.72031	10.7563	3.05e-07	3.43598	3.29508	1.04276	darkblue	Contig507	1.4221	11.7094	0.000108834	NA	0,5,6,22,30	Neoblast,Intestine	4,7	phagocytes	Gut	O75390	CS	Citrate synthase, mitochondrial	0	439	72.21	Q9CZU6	Cs	Citrate synthase, mitochondrial	0	434	70.968	Q7ZVY5	cs	Citrate synthase, mitochondrial	0	448	71.205	Q9W401	kdn	Probable citrate synthase, mitochondrial	0	432	69.213	P34575
dd_Smed_v6_33503_0_1	NA	NA	NA	523	5.64451	3.57795	4.15e-23	5.36159	3.57795	2.59e-21	50.0226	41.115	1.21665	darkblue	NA	NA	NA	NA	NA	NA	NA	NA	NA	NA	NA	NA	NA	NA	NA	NA	NA	NA	NA	NA	NA	NA	NA	NA	NA	NA	NA	NA	NA	NA	NA	NA	NA	NA	NA
dd_Smed_v6_3352_0_1	NA	RBKS	Ribokinase	1507	0.953864	6.84312	0.00164751	1.11388	6.84312	0.000222199	1.93705	2.16427	0.895014	dodgerblue	Contig5178	0.179194	8.57642	0.217709	NA	10,27,31	Cathepsin+ cell,Pharynx	7	NA	NA	Q9H477	RBKS	Ribokinase	2.21e-48	299	35.117	Q8R1Q9	Rbks	Ribokinase	2.58e-46	299	34.448	F1RCK7	rbks	Ribokinase	2.94e-50	302	32.781	O77425	EG:115C2.1	Ribokinase	7.25e-46	302	34.437	Q19133
dd_Smed_v6_33595_0_1	NA	GVQW1	Protein GVQW1	247	1.99502	5.40916	2.1e-07	1.72201	5.40916	9.23e-06	3.98623	3.29896	1.20833	darkblue	NA	NA	NA	NA	NA	NA	NA	NA	NA	NA	Q8N7I0	GVQW1	Protein GVQW1	3.76e-21	43	76.744	NA	NA	NA	NA	NA	NA	NA	NA	NA	NA	NA	NA	NA	NA	NA	NA	NA	NA	NA
dd_Smed_v6_3361_0_1	NA	PAK1	Serine/threonine-protein kinase PAK 1	2066	2.54072	5.82852	5.67e-19	2.08181	5.82852	2.52e-13	5.8188	4.23339	1.3745	darkblue	Contig1629	1.08189	8.12452	0.00445952	NA	11,23,30,33	Epidermal,Neural,Intestine	4,7	late epidermal progenitors 2	NA	E9PM17	PAK1	Serine/threonine-protein kinase PAK 1	5.82e-16	238	28.571	Q8CIN4	Pak2	Serine/threonine-protein kinase PAK 2	5.86e-15	217	29.032	A0A0R4IFR1	pak1	P21 protein (Cdc42/Rac)-activated kinase 1	5.87e-17	217	29.954	Q24190	Pak	Serine/threonine kinase PAK homolog DPAK	2.27e-14	162	29.63	X5M5N0
dd_Smed_v6_3362_0_1	NA	RAC1	Ras-related C3 botulinum toxin substrate 1	834	6.64602	6.29195	4.54e-78	6.64101	6.29195	4.31e-78	100.15	99.803	1.00348	darkblue	Contig2853	2.39458	11.088	5.33e-05	NA	30	Intestine	4	NA	NA	P63000	RAC1	Ras-related C3 botulinum toxin substrate 1	4.66e-89	193	64.249	P63001	Rac1	Ras-related C3 botulinum toxin substrate 1	5.12e-89	193	64.249	Q7ZSZ9	rac1a	Rac1	4.4e-87	193	63.731	P40792	Rac1	Ras-related protein Rac1	9.79e-87	193	62.694	Q03206
dd_Smed_v6_3369_0_1	NA	WASHC5	WASH complex subunit 5	3722	2.8201	5.77401	8.79e-20	2.38545	5.77401	9.29e-15	7.06209	5.22508	1.35158	darkblue	Contig372	1.65572	8.09278	3.95e-05	NA	17,30	Cathepsin+ cell,Intestine	NA	NA	NA	Q12768	WASHC5	WASH complex subunit 5	0	1186	48.735	Q8C2E7	Washc5	WASH complex subunit 5	0	1186	48.314	Q7ZVM1	washc5	WASH complex subunit 5	0	1185	49.705	Q9VUY8	Strumpellin	WASH complex subunit homolog 5	0	1217	38.784	NA
dd_Smed_v6_3370_0_1	NA	RAB7A	Ras-related protein Rab-7a	1028	1.92531	3.69074	1.9e-06	1.56289	3.69074	0.00014209	3.79819	2.95444	1.28559	darkblue	Contig1543	1.2667	7.22332	0.00437586	NA	NA	NA	NA	NA	NA	P51149	RAB7A	Ras-related protein Rab-7a	2.83e-84	205	57.561	P51150	Rab7a	Ras-related protein Rab-7a	3.11e-84	205	57.561	Q7T2C6	rab7	RAB7, member RAS oncogene family	8.59e-85	205	58.049	O76742	Rab7	CG5915 protein	5.58e-87	206	58.738	Q23146
dd_Smed_v6_3371_0_1	NA	HSD17B12	Very-long-chain 3-oxoacyl-CoA reductase	1138	1.48084	4.84953	5.14e-05	1.47812	4.84953	6.12e-05	2.79111	2.78585	1.00189	darkblue	Contig6399	0.875079	8.6346	0.00271784	NA	26	Protonephridia	NA	NA	NA	Q53GQ0	HSD17B12	Very-long-chain 3-oxoacyl-CoA reductase	2.48e-55	274	40.146	O70503	Hsd17b12	Very-long-chain 3-oxoacyl-CoA reductase	4.44e-48	245	40.816	Q1JQ48	hsd20b2	Si:ch211-284e13.2 protein	8.88e-48	241	43.154	Q86BQ3	CG13284	Uncharacterized protein, isoform A	2.73e-48	261	39.464	Q09517
dd_Smed_v6_3372_0_1	NA	MROH2B	Maestro heat-like repeat-containing protein family member 2B	5445	2.27993	5.13203	2.1e-17	2.15389	5.13203	1.1e-15	4.85654	4.45027	1.09129	darkblue	PL06017A1F12	0.0932952	6.23624	0.507462	NA	10,17	Cathepsin+ cell	NA	NA	NA	Q7Z745	MROH2B	Maestro heat-like repeat-containing protein family member 2B	2.21e-68	1664	21.635	G3XA21	Mroh1	MCG134445, isoform CRA_a	0	1746	27.033	NA	NA	NA	NA	NA	NA	Q9W350	c11.1	C11.1, isoform A	6.95e-66	1846	21.018	NA
dd_Smed_v6_3373_0_1	NA	PCYT2	Ethanolamine-phosphate cytidylyltransferase	1233	1.55578	5.04824	5.23e-06	1.55929	5.04824	5.68e-06	2.93992	2.94708	0.997571	dodgerblue	Contig4909	1.32428	8.00706	0.00028636	NA	21,30	Neural,Intestine	4	NA	NA	Q99447	PCYT2	Ethanolamine-phosphate cytidylyltransferase	3.87e-122	353	50.142	Q811Q9	Pcyt1b	Choline-phosphate cytidylyltransferase B	5.35e-28	138	44.203	A8BAQ7	pcyt2	Phosphate cytidylyltransferase 2, ethanolamine	2.14e-118	346	48.844	Q8IP79	Pect	Phosphoethanolamine cytidylyltransferase, isoform C	7.67e-125	345	53.623	Q9BKU2
dd_Smed_v6_3375_0_1	NA	APAF1	Apoptotic protease-activating factor 1	4203	1.10922	3.86006	0.00355476	1.26757	3.86006	0.000827688	2.15729	2.40755	0.896052	dodgerblue	NA	NA	NA	NA	NA	24	Epidermal	NA	NA	NA	O14727	APAF1	Apoptotic protease-activating factor 1	4.84e-16	697	22.669	O88879	Apaf1	Apoptotic protease-activating factor 1	1.05e-12	685	21.898	Q9I9H8	apaf1	Apoptotic protease-activating factor 1	5.11e-05	194	26.289	NA	NA	NA	NA	NA	NA	NA
dd_Smed_v6_3376_0_1	NA	BPGAP1	BCH domain-containing Cdc42GAP-like protein	1685	1.34763	5.53429	2.6e-06	1.42838	5.53429	6.82e-07	2.54494	2.69145	0.945566	dodgerblue	Contig2140	1.17127	7.79482	0.000266655	NA	9,17,20,24,27,29,30,37,41	Neural,Cathepsin+ cell,Epidermal,Pharynx,Protonephridia,Intestine	4	NA	NA	Q8IZM6	BPGAP1	BCH domain-containing Cdc42GAP-like protein	7.31e-81	346	41.04	Q9CXP4	Arhgap8	Rho GTPase-activating protein 8	2.67e-80	346	39.595	F1R2J2	arhgap1	Rho GTPase-activating protein 1	4.45e-77	355	39.437	Q9VTU3	RhoGAP68F	Rho GTPase-activating protein 68F	4.53e-59	338	36.686	Q23130
dd_Smed_v6_338_0_1	NA	UBA52	Ubiquitin A-52 residue ribosomal protein fusion product 1	437	5.24592	7.81159	6.08e-56	5.12893	7.81159	4.96e-54	37.9471	34.9913	1.08447	darkblue	Contig6913	-0.867202	7.6767	0.0299986	NA	19	Intestine	2,5	NA	NA	Q3MIH3	UBA52	Ubiquitin A-52 residue ribosomal protein fusion product 1	2.47e-15	81	38.272	P62984	Uba52	Ubiquitin-60S ribosomal protein L40	2.72e-15	81	38.272	B0R193	ubb	Ubiquitin B	1.02e-15	76	38.158	P18101	RpL40	Ubiquitin-60S ribosomal protein L40	2.26e-15	81	38.272	P49632
dd_Smed_v6_3397_0_1	NA	NA	NA	1139	1.09079	5.09661	0.00118782	0.749273	5.09661	0.0382327	2.1299	1.68095	1.26709	darkblue	Contig6898	0.981006	7.48843	0.0208477	NA	17	Cathepsin+ cell	NA	NA	NA	NA	NA	NA	NA	NA	NA	Q9D291	Desi2	Desumoylating isopeptidase 2	4.78e-50	146	50	Q6DC39	desi2	Desumoylating isopeptidase 2	7.66e-50	147	47.619	Q7K2B1	CG7222	CG7222, isoform A	1.58e-53	147	50.34	NA
dd_Smed_v6_3398_0_1	NA	WDFY3	WD repeat and FYVE domain-containing protein 3	11680	1.1506	6.31689	0.000145448	1.13149	6.31689	0.000220907	2.22006	2.19086	1.01333	darkblue	Contig1351	0.962596	7.23332	0.000566652	NA	8,9,17,20,21,23,32,33,41	Neural,Cathepsin+ cell	NA	otf+ cells 1	NA	Q8IZQ1	WDFY3	WD repeat and FYVE domain-containing protein 3	0	2773	31.879	Q6VNB8	Wdfy3	WD repeat and FYVE domain-containing protein 3	0	2765	31.863	Q5BJ09	nbeaa	Neurobeachin	3.83e-100	731	32.832	Q9VML2	bchs	Blue cheese	0	1068	53.184	Q19317
dd_Smed_v6_3401_0_1	NA	HDAC11	Histone deacetylase 11	3145	1.16808	5.50736	0.000218965	0.821604	5.50736	0.0141785	2.24713	1.76737	1.27145	darkblue	Contig2777	0.229792	8.3098	0.286964	NA	23	Neural	NA	NA	NA	Q96DB2	HDAC11	Histone deacetylase 11	2.07e-21	88	53.409	Q91WA3	Hdac11	Histone deacetylase 11	1.32e-20	88	53.409	NA	NA	NA	NA	NA	NA	Q9VC26	HDAC11	Histone deacetylase 11, isoform A	7.49e-28	92	42.391	Q18477
dd_Smed_v6_3405_0_1	NA	NA	NA	1007	2.19789	5.84343	3.09e-11	2.03008	5.84343	9.87e-10	4.58809	4.08427	1.12336	darkblue	Contig1611	2.14744	8.89565	3.77e-05	NA	17,24,30	Cathepsin+ cell,Epidermal,Intestine	4	NA	NA	NA	NA	NA	NA	NA	NA	NA	NA	NA	NA	NA	NA	NA	NA	NA	NA	NA	NA	NA	NA	NA	NA	NA	NA	NA
dd_Smed_v6_3416_0_1	NA	MIB1	E3 ubiquitin-protein ligase MIB1	1752	1.73343	5.60602	1.46e-06	1.38663	5.60602	0.000154276	3.32518	2.61468	1.27174	darkblue	Contig4150	0.347721	6.85314	0.0312899	NA	10,17,30	Cathepsin+ cell,Intestine	4	NA	NA	Q86YT6	MIB1	E3 ubiquitin-protein ligase MIB1	1.03e-08	73	32.877	Q80SY4	Mib1	E3 ubiquitin-protein ligase MIB1	1.01e-08	73	32.877	Q804S5	mib1	E3 ubiquitin-protein ligase mib1	5.93e-09	73	32.877	Q9VJ14	mib2	LD11955p	1.03e-08	98	27.551	NA
dd_Smed_v6_3432_0_1	NA	SCUBE1	Signal peptide, CUB and EGF-like domain-containing protein 1	1068	2.11821	3.50238	0.000352086	2.06032	3.50238	0.000594261	4.34156	4.17077	1.04095	darkblue	Contig2223	1.13172	7.38249	0.00393841	NA	10,28	Cathepsin+ cell	4	NA	NA	Q8IWY4	SCUBE1	Signal peptide, CUB and EGF-like domain-containing protein 1	2.68e-11	148	30.405	Q6NZL8	Scube1	Signal peptide, CUB and EGF-like domain-containing protein 1	3.98e-10	149	31.544	A0A0R4IBT9	scube1	Signal peptide, CUB domain, EGF-like 1	5.58e-11	150	31.333	E1JHA6	uif	Uninflatable, isoform C	3.71e-10	206	28.155	Q20531
dd_Smed_v6_3436_0_1	NA	NA	NA	799	2.11327	5.34875	6.89e-10	1.91856	5.34875	2.54e-08	4.32671	3.78045	1.1445	darkblue	NA	NA	NA	NA	NA	30	Intestine	4	NA	NA	NA	NA	NA	NA	NA	NA	NA	NA	NA	NA	NA	NA	NA	NA	NA	NA	NA	NA	NA	NA	NA	NA	NA	NA	NA
dd_Smed_v6_3439_0_1	NA	TMEM41A	Transmembrane protein 41A	895	1.02987	5.40136	0.0021806	1.22101	5.40136	0.000256727	2.04185	2.33109	0.875919	dodgerblue	Contig5477	-0.0933555	9.13787	0.504423	NA	NA	NA	NA	NA	NA	Q96HV5	TMEM41A	Transmembrane protein 41A	3.58e-24	202	27.228	Q8K1A5	Tmem41b	Transmembrane protein 41B	3.03e-48	240	39.167	A1A5V7	tmem41b	Transmembrane protein 41B	1.4e-50	206	40.777	Q9VX39	stas	Transmembrane protein 41 homolog	4.94e-48	190	37.895	NA
dd_Smed_v6_3440_0_1	NA	NA	NA	2436	1.28466	3.14379	0.00367772	1.24389	3.14379	0.00573333	2.43625	2.36836	1.02867	darkblue	Contig948	0.48302	7.99079	0.0141899	NA	6	Intestine	7	NA	Cathepsin+ b	NA	NA	NA	NA	NA	NA	NA	NA	NA	NA	NA	NA	NA	NA	NA	NA	NA	NA	NA	NA	NA	NA	NA	NA	NA
dd_Smed_v6_3443_0_1	znf408	ZFP37	Zinc finger protein 37 homolog	1603	1.72938	4.34007	2.05e-07	1.99635	4.34007	2.11e-09	3.31586	3.9899	0.831064	dodgerblue	Contig1854	0.812507	9.355	0.00304714	uniform	4,6,26	Cathepsin+ cell,Intestine,Protonephridia	NA	NA	NA	Q9Y6Q3	ZFP37	Zinc finger protein 37 homolog	8.57e-16	147	30.612	G3UY09	Zfp141	MCG61508	3.24e-14	142	33.099	E7FAN3	znf408	Zinc finger protein 408	3.37e-17	124	35.484	P13360	gl	Protein glass	5.76e-17	174	32.759	Q93560
dd_Smed_v6_3452_0_1	NA	NA	NA	1026	4.59732	3.948	2.46e-28	4.81311	3.948	1.87e-30	24.2064	28.1119	0.861073	dodgerblue	Contig1289	-0.206831	7.40638	0.211043	NA	6,19,27	Intestine,Pharynx	5	NA	NA	NA	NA	NA	NA	NA	NA	NA	NA	NA	NA	NA	NA	NA	NA	NA	NA	NA	NA	NA	NA	NA	NA	NA	NA	NA
dd_Smed_v6_3453_0_1	NA	TFPI2	Tissue factor pathway inhibitor 2	380	6.1602	7.15615	4.81e-66	5.64629	7.15615	3.11e-58	71.5163	50.0844	1.42792	darkblue	NA	NA	NA	NA	NA	NA	NA	8	NA	NA	P48307	TFPI2	Tissue factor pathway inhibitor 2	1.26e-10	55	43.636	Q3UW09	Spint3	Putative uncharacterized protein	2e-15	85	41.176	A0A0R4ISD8	podxl2	Podocalyxin-like 2	6.68e-12	51	49.02	Q9VQU0	CG10031	Uncharacterized protein	9.86e-14	63	44.444	Q18761
dd_Smed_v6_3455_0_1	cele_y59a8b	NA	NA	1593	2.29119	6.17844	2.41e-12	2.54939	6.17844	9.34e-15	4.89459	5.85387	0.836129	dodgerblue	Contig2273	-1.00533	9.30877	0.00241218	basal	11,19	Epidermal,Intestine	2,5	NA	NA	NA	NA	NA	NA	NA	NA	NA	NA	NA	NA	NA	NA	A0A0R4IHG0	slc16a6a	Uncharacterized protein	7.84e-05	123	27.642	C8VV48	kar	Karmoisin, isoform B	0.000136	83	33.735	Q9GRY3
dd_Smed_v6_3459_0_1	NA	NA	NA	386	1.10471	4.59057	0.0029118	0.801863	4.59057	0.0432822	2.15055	1.74335	1.23357	darkblue	NA	NA	NA	NA	NA	NA	NA	NA	NA	NA	NA	NA	NA	NA	NA	NA	NA	NA	NA	NA	NA	NA	NA	NA	NA	NA	NA	NA	NA	NA	NA	NA	NA	NA	NA
dd_Smed_v6_3470_0_1	NA	SCYL1	N-terminal kinase-like protein	2227	1.19871	3.4737	0.00123119	0.7655	3.4737	0.0586248	2.29534	1.69996	1.35023	darkblue	NA	NA	NA	NA	NA	13,23,27,37	Muscle,Neural,Pharynx	NA	NA	NA	E9PS17	SCYL1	N-terminal kinase-like protein	7.82e-114	544	39.154	Q9EQC5	Scyl1	N-terminal kinase-like protein	4.81e-112	544	38.787	F6NUS5	cdk5	Cyclin-dependent kinase 5	1.6e-08	230	25.217	Q9VAH7	yata	RE62393p	1.99e-117	576	39.931	NA
dd_Smed_v6_3484_0_1	NA	MPPED1	Metallophosphoesterase domain-containing protein 1	1900	0.902159	4.94023	0.00379524	1.16771	4.94023	0.000137143	1.86886	2.24655	0.831879	dodgerblue	Contig3655	0.800183	7.67254	0.00148411	NA	8,9,18,23,33	Neural	1	NA	NA	O15442	MPPED1	Metallophosphoesterase domain-containing protein 1	8.41e-43	205	41.463	Q91ZG2	Mpped1	Metallophosphoesterase domain-containing protein 1	1.48e-42	205	41.463	Q567D4	mpped2a	Zgc:112142	4.23e-41	201	41.791	NA	NA	NA	NA	NA	NA	Q22306
dd_Smed_v6_34847_0_1	NA	NA	NA	609	4.35429	0.938355	0.000727746	5.26596	0.938355	7.38e-05	20.4537	38.4779	0.531569	orange	NA	NA	NA	NA	NA	NA	NA	5	NA	NA	NA	NA	NA	NA	NA	NA	NA	NA	NA	NA	NA	NA	NA	NA	NA	NA	NA	NA	NA	NA	NA	NA	NA	NA	NA
dd_Smed_v6_3487_0_1	NA	RNF7	RING-box protein 2	448	1.13977	4.03971	0.00966637	0.975471	4.03971	0.0338278	2.20346	1.96628	1.12062	darkblue	Contig6661	0.073381	7.15804	0.468866	NA	NA	NA	NA	NA	NA	Q9UBF6	RNF7	RING-box protein 2	2.24e-35	85	58.824	Q9WTZ1	Rnf7	RING-box protein 2	4.3e-35	85	58.824	Q5EB19	rnf7	Ring finger protein 7	2.8e-35	85	58.824	Q7JWH5	Roc2	MIP07211p	4.68e-34	107	49.533	P91404
dd_Smed_v6_3493_1_1	NA	DLG1	Disks large homolog 1	1387	1.18873	6.05411	1.77e-05	0.812879	6.05411	0.00524898	2.27953	1.75671	1.29761	darkblue	Contig4256	0.540264	7.25455	0.0666616	NA	9,20,21,24,33,37	Neural,Epidermal,Pharynx	4	NA	NA	Q12959	DLG1	Disks large homolog 1	1.23e-28	223	38.565	Q811D0	Dlg1	Disks large homolog 1	7.19e-29	223	38.117	Q6R005	dlg4	Disks large homolog 4	2.65e-31	384	31.51	P31007	dlg1	Disks large 1 tumor suppressor protein	1e-27	232	37.931	G5ECY0
dd_Smed_v6_3499_0_1	NA	SLCO1B3	Solute carrier organic anion transporter family member 1B3	2258	6.09127	5.41075	1.69e-52	6.09697	5.41075	1.69e-52	68.1796	68.4494	0.996059	dodgerblue	NA	NA	NA	NA	NA	30	Intestine	4,5	NA	NA	Q9NPD5	SLCO1B3	Solute carrier organic anion transporter family member 1B3	1.87e-48	631	26.624	Q99J94	Slco1a6	Solute carrier organic anion transporter family member 1A6	2.29e-47	634	26.656	E7F5H8	LOC570448	Solute carrier organic anion transporter family member	1.08e-45	670	26.119	Q7KTG4	Oatp30B	Organic anion transporting polypeptide 30B, isoform D	6.78e-40	692	23.699	X5LPS1
dd_Smed_v6_3507_0_1	NA	PRELID1	PRELI domain-containing protein 1, mitochondrial	1020	1.08238	5.31449	0.000589405	1.02858	5.31449	0.00132043	2.11752	2.04002	1.03799	darkblue	Contig1324	0.710402	7.41701	0.00513414	NA	NA	NA	NA	NA	NA	Q9Y255	PRELID1	PRELI domain-containing protein 1, mitochondrial	5.51e-29	170	34.706	Q8R107	Prelid1	PRELI domain-containing protein 1, mitochondrial	3.54e-29	170	35.294	Q7T388	prelid1a	PRELI domain containing 1	3.85e-28	169	34.911	Q9V579	prel	Protein preli-like	2.29e-15	167	29.94	Q17476
dd_Smed_v6_3508_0_1	NA	SLC28A3	Solute carrier family 28 member 3	2199	5.36191	5.99382	8.4e-41	4.94457	5.99382	4.61e-36	41.1241	30.7937	1.33547	darkblue	Contig3413	2.73974	8.6929	2.61e-05	NA	10,30,43	Cathepsin+ cell,Intestine	4,7	NA	NA	Q9HAS3	SLC28A3	Solute carrier family 28 member 3	7.71e-110	421	50.356	Q9ERH8	Slc28a3	Solute carrier family 28 member 3	1.06e-111	436	50.459	NA	NA	NA	NA	NA	NA	Q7K4A1	CNT2	Sodium/nucleoside cotransporter	9.29e-93	446	42.377	G5EE77
dd_Smed_v6_3509_0_1	NA	PRUNE1	Exopolyphosphatase PRUNE1	2829	1.96671	5.87616	2.17e-11	1.9771	5.87616	2.01e-11	3.90875	3.937	0.992825	dodgerblue	NA	NA	NA	NA	NA	6,19,31	Intestine,Cathepsin+ cell	7	NA	NA	Q86TP1	PRUNE1	Exopolyphosphatase PRUNE1	3.61e-26	363	27.824	Q8BIW1	Prune1	Exopolyphosphatase PRUNE1	2.62e-24	370	27.027	NA	NA	NA	NA	NA	NA	O18399	pn	EG:152A3.5 protein (Fbgn0003116;pn protein)	6.66e-19	267	26.217	NA
dd_Smed_v6_3510_0_1	NA	NA	NA	446	4.11324	3.61251	1.85e-12	4.79715	3.61251	1.06e-15	17.3065	27.8027	0.622475	orange	NA	NA	NA	NA	NA	NA	NA	5	NA	NA	NA	NA	NA	NA	NA	NA	NA	NA	NA	NA	NA	NA	NA	NA	NA	NA	NA	NA	NA	NA	NA	NA	NA	NA	NA
dd_Smed_v6_3512_0_1	NA	DHRS7B	Dehydrogenase/reductase SDR family member 7B	1113	1.10877	4.75207	0.000775459	1.2029	4.75207	0.000274755	2.15661	2.30202	0.936834	dodgerblue	Contig6298	0.381637	7.62837	0.0908428	NA	25,27,37	Pharynx	7	NA	NA	Q6IAN0	DHRS7B	Dehydrogenase/reductase SDR family member 7B	1e-52	311	35.691	Q99J47	Dhrs7b	Dehydrogenase/reductase SDR family member 7B	1.97e-57	296	39.527	Q0P3U1	dhrs7	Dehydrogenase/reductase (SDR family) member 7	8.4e-17	296	26.014	Q9Y140	CG7601	Dehydrogenase/reductase SDR family protein 7-like	1.98e-51	306	37.908	G5EGA6
dd_Smed_v6_3520_0_1	NA	DSCR3	Down syndrome critical region protein 3	1136	1.25897	5.35709	5.68e-05	1.18794	5.35709	0.000176059	2.39325	2.27828	1.05046	darkblue	Contig960	0.836322	8.80952	0.00137378	NA	NA	NA	NA	NA	NA	O14972	DSCR3	Down syndrome critical region protein 3	8.77e-94	300	45.667	O35075	Dscr3	Down syndrome critical region protein 3 homolog	4.74e-99	300	47	Q6DHL2	dscr3	Down syndrome critical region 3	2.14e-98	301	46.179	Q9VPC3	Dmel\CG4074	CG4074, isoform A	1.8e-74	287	43.206	O01258
dd_Smed_v6_3535_0_1	NA	MRPS18B	28S ribosomal protein S18b, mitochondrial	854	1.25348	4.35329	0.000207157	0.736483	4.35329	0.0461221	2.38415	1.66611	1.43097	darkblue	Contig768	0.206565	8.40493	0.134283	NA	22	Neoblast	NA	NA	NA	Q9Y676	MRPS18B	28S ribosomal protein S18b, mitochondrial	7.61e-23	112	43.75	Q99N84	Mrps18b	28S ribosomal protein S18b, mitochondrial	9.15e-23	112	41.964	Q566S7	mrps18b	Mitochondrial ribosomal protein S18B	2.13e-23	114	42.105	Q9VIN9	mRpS18B	LP10852p	1.02e-36	205	37.561	Q22470
dd_Smed_v6_354_0_1	NA	TSPAN3	Tetraspanin-3	1007	5.34816	11.3937	9.52e-45	5.18253	11.3937	1.13e-42	40.7339	36.316	1.12165	darkblue	Contig2538	3.22906	10.6912	0.00010358	NA	6,17,19,30,31	Intestine,Cathepsin+ cell	4	phagocytes	Gut	O60637	TSPAN3	Tetraspanin-3	3.39e-14	135	34.074	Q9QY33	Tspan3	Tetraspanin-3	1.11e-14	133	34.586	A3KP31	tspan3b	Tetraspanin	1.34e-11	135	30.37	Q9VID1	Tsp39D	Tetraspanin	3.33e-09	219	28.311	Q17526
dd_Smed_v6_3541_0_1	NA	NA	NA	465	7.27103	4.74123	7.62e-63	6.7173	4.74123	1.05e-55	154.453	105.223	1.46787	darkblue	NA	NA	NA	NA	NA	NA	NA	7	NA	NA	NA	NA	NA	NA	NA	NA	NA	NA	NA	NA	NA	NA	NA	NA	NA	NA	NA	NA	NA	NA	NA	NA	NA	NA	NA
dd_Smed_v6_3546_0_1	NA	THOP1	Thimet oligopeptidase 1	2175	1.04051	6.32999	0.000362049	1.30087	6.32999	7.03e-06	2.05695	2.46377	0.83488	dodgerblue	PL06011A2D06	-0.137948	6.22112	0.575615	NA	0,5,6,22	Neoblast,Intestine	NA	NA	Neoblast	Q96CV8	THOP1	Thimet oligopeptidase 1	0	662	48.792	Q8C1A5	Thop1	Thimet oligopeptidase	0	663	48.718	E7EZ90	thop1	Thimet oligopeptidase 1	0	658	48.936	A1Z6H6	CG7791	CG7791	4.93e-38	628	24.682	Q95PY9
dd_Smed_v6_3550_0_1	tdo2	TDO2	Tryptophan 2,3-dioxygenase	1282	4.05596	4.67463	3.89e-24	4.34584	4.67463	6.28e-27	16.6328	20.3343	0.817968	dodgerblue	NA	NA	NA	NA	basal	19	Intestine	2,3,5	goblet cells	NA	P48775	TDO2	Tryptophan 2,3-dioxygenase	8.91e-117	352	51.42	P48776	Tdo2	Tryptophan 2,3-dioxygenase	3.58e-119	385	49.091	Q7SY53	tdo2b	Tryptophan 2,3-dioxygenase B	4.28e-118	368	47.826	P20351	v	Tryptophan 2,3-dioxygenase	2.51e-131	354	56.215	Q09474
dd_Smed_v6_3552_0_1	NA	COMMD7	COMM domain-containing protein 7	441	2.21442	4.52694	3.57e-09	2.21039	4.52694	4.47e-09	4.64095	4.62801	1.0028	darkblue	NA	NA	NA	NA	NA	17	Cathepsin+ cell	NA	NA	Cathepsin+ b	Q86VX2	COMMD7	COMM domain-containing protein 7	2.25e-13	65	47.692	Q8BG94	Commd7	COMM domain-containing protein 7	8.79e-13	70	45.714	F1QJA8	commd7	COMM domain-containing 7	2.49e-16	81	46.914	NA	NA	NA	NA	NA	NA	NA
dd_Smed_v6_3557_0_1	NA	NA	NA	624	1.22675	4.16496	0.00210154	1.08291	4.16496	0.0085009	2.34039	2.11831	1.10484	darkblue	Contig2154	0.0730438	7.43283	0.260219	NA	NA	NA	NA	NA	NA	NA	NA	NA	NA	NA	NA	NA	NA	NA	NA	NA	NA	NA	NA	NA	NA	NA	NA	NA	NA	NA	NA	NA	NA	NA
dd_Smed_v6_3560_0_1	NA	DDO	D-aspartate oxidase	1137	4.38029	6.80606	1.07e-25	4.5197	6.80606	6.28e-27	20.8257	22.9385	0.907894	dodgerblue	Contig2251	1.23638	7.71476	0.000961763	NA	10,30	Cathepsin+ cell,Intestine	4,7	NA	NA	Q99489	DDO	D-aspartate oxidase	1.1e-66	332	37.349	Q922Z0	Ddo	D-aspartate oxidase	8.08e-62	331	35.952	A2BGT2	dao.2	D-amino-acid oxidase, tandem duplicate 2	9.81e-60	344	32.849	Q9VM80	CG11236	GH12548p	3.37e-74	345	39.42	Q95XG9
dd_Smed_v6_3562_0_1	NA	TRAF6	TNF receptor-associated factor 6	1608	1.98379	4.35592	1.38e-07	2.21658	4.35592	4.48e-09	3.95531	4.64789	0.850991	dodgerblue	Contig4866	1.62646	7.58137	0.000118251	NA	NA	NA	NA	NA	NA	Q9Y4K3	TRAF6	TNF receptor-associated factor 6	7.94e-08	98	33.673	P39429	Traf2	TNF receptor-associated factor 2	8.35e-08	106	31.132	Q6DEG0	traf3	TNF receptor-associated factor 3	2.3e-08	478	20.921	Q9W3I9	Traf6	GH01161p	3.45e-07	146	25.342	NA
dd_Smed_v6_3565_0_1	NA	RUNX1	Runt-related transcription factor 1	1552	2.23985	2.51784	5.28e-05	1.67275	2.51784	0.00337112	4.72348	3.18823	1.48154	darkblue	Contig1091	-0.0588131	6.71552	0.671061	NA	4,6,10,15	Cathepsin+ cell,Intestine	0	NA	NA	A8MZI9	RUNX1	Runt-related transcription factor 1	2.71e-40	139	51.079	Q03347	Runx1	Runt-related transcription factor 1	6.97e-39	139	51.799	Q596E6	runx2a	Runx2a splice form 4	1.25e-41	132	55.303	Q9W349	lz	Protein lozenge	2.38e-40	136	55.147	G5EFQ5
dd_Smed_v6_3569_0_1	NA	NA	NA	661	2.34507	2.57693	8.65e-05	1.47294	2.57693	0.0193913	5.08085	2.77586	1.83037	green	Contig991	0.442728	8.26876	0.0504037	NA	2,3,11,25,35	Epidermal,Pharynx	0	late epidermal progenitors 2	Early_epithelial_progeny	NA	NA	NA	NA	NA	NA	NA	NA	NA	NA	NA	NA	NA	NA	NA	NA	NA	NA	NA	NA	NA	NA	NA	NA	NA
dd_Smed_v6_3575_0_1	NA	RBMS1	RNA-binding motif, single-stranded-interacting protein 1	1173	2.21113	4.46434	5.96e-15	1.93947	4.46434	8.52e-12	4.63037	3.83565	1.20719	darkblue	Contig4307	1.67036	8.09422	0.00011543	NA	9,20,21,24,33,37	Neural,Epidermal,Pharynx	4	NA	NA	P29558	RBMS1	RNA-binding motif, single-stranded-interacting protein 1	4.13e-08	67	35.821	A2A5N3	Pabpc1l	Polyadenylate-binding protein	9.32e-09	81	37.037	B8K0D5	pabpc1l	Poly(A)-binding protein, cytoplasmic 1-like	5.66e-08	81	35.802	P16914	elav	Protein elav	2.05e-09	80	35	Q95QV8
dd_Smed_v6_3578_0_1	NA	SLC15A4	Solute carrier family 15 member 4	1776	7.39823	3.59028	7.41e-21	7.28528	3.59028	2.38e-20	168.69	155.987	1.08144	darkblue	Contig1439	2.353	7.66251	0.000163308	NA	30	Intestine	4	NA	NA	Q8N697	SLC15A4	Solute carrier family 15 member 4	1.15e-66	457	33.26	Q8BPX9	Slc15a3	Solute carrier family 15 member 3	2.94e-54	476	32.143	B0S6T2	slc15a2	Solute carrier family 15 (oligopeptide transporter), member 2	5.58e-32	387	28.941	P91679	yin	Peptide transporter family 1	7.59e-26	334	28.443	O01840
dd_Smed_v6_3592_0_1	NA	PLA2G15	Group XV phospholipase A2	1481	3.5615	4.64772	8.46e-23	3.36352	4.64772	1.13e-20	11.8064	10.2925	1.14709	darkblue	Contig1798	2.43077	8.5824	3.61e-05	NA	30	Intestine	4	NA	NA	Q8NCC3	PLA2G15	Group XV phospholipase A2	4.51e-76	371	37.197	Q8VEB4	Pla2g15	Group XV phospholipase A2	2.88e-72	371	37.736	NA	NA	NA	NA	NA	NA	NA	NA	NA	NA	NA	NA	NA
dd_Smed_v6_3596_0_1	NA	SLC25A11	Mitochondrial 2-oxoglutarate/malate carrier protein	1171	1.66384	3.51301	0.00116415	1.52758	3.51301	0.00352328	3.16859	2.88301	1.09906	darkblue	Contig2532	0.506023	7.91071	0.0100815	NA	NA	NA	NA	NA	NA	Q02978	SLC25A11	Mitochondrial 2-oxoglutarate/malate carrier protein	2.67e-141	291	65.292	Q9CR62	Slc25a11	Mitochondrial 2-oxoglutarate/malate carrier protein	1.53e-141	291	65.292	F1R319	slc25a11	Solute carrier family 25 (mitochondrial carrier; oxoglutarate carrier), member 11	4.72e-141	289	66.09	Q9VAJ9	CG1907	CG1907	3.91e-118	290	57.586	P90992
dd_Smed_v6_3599_0_1	NA	PIK3CB	Phosphatidylinositol 4,5-bisphosphate 3-kinase catalytic subunit beta isoform	3463	1.21197	4.30652	0.000134479	0.91416	4.30652	0.00586429	2.31653	1.88447	1.22928	darkblue	Contig4261	0.107638	6.28218	0.479654	NA	10,17,39,40,41	Cathepsin+ cell,Protonephridia	7	NA	NA	P42338	PIK3CB	Phosphatidylinositol 4,5-bisphosphate 3-kinase catalytic subunit beta isoform	4.25e-123	894	31.991	Q8BTI9	Pik3cb	Phosphatidylinositol 4,5-bisphosphate 3-kinase catalytic subunit beta isoform	4.15e-124	892	31.839	E7F251	pik3cb	Phosphatidylinositol-4,5-bisphosphate 3-kinase, catalytic subunit beta	7.15e-116	882	31.633	P91634	Pi3K92E	PI-3 kinase	4.39e-101	992	28.427	Q94125
dd_Smed_v6_3602_0_1	apmap	APMAP	Adipocyte plasma membrane-associated protein	1378	3.88378	4.60169	5.01e-09	3.82703	4.60169	9.43e-09	14.7617	14.1923	1.04012	darkblue	Contig2304	1.00774	8.37017	0.00720289	uniform	30	Intestine	7	NA	NA	Q9HDC9	APMAP	Adipocyte plasma membrane-associated protein	3.67e-41	391	26.598	Q9D7N9	Apmap	Adipocyte plasma membrane-associated protein	7.05e-38	392	25.51	Q803F5	apmap	Adipocyte plasma membrane-associated protein	2.91e-41	338	29.882	Q58SM8	Hmu	Hemomucin	7.7e-29	359	27.577	O62265
dd_Smed_v6_3604_0_1	NA	MIB1	E3 ubiquitin-protein ligase MIB1	1529	1.94752	4.62211	2.6e-08	1.71991	4.62211	1.09e-06	3.85712	3.29417	1.17089	darkblue	Contig4146	1.42003	7.10973	0.00516757	NA	10,15,17,28,30,39,41	Cathepsin+ cell,Intestine	4	aqp+ parenchymal cells	Cathepsin+ b	Q86YT6	MIB1	E3 ubiquitin-protein ligase MIB1	4.95e-15	187	29.412	Q80SY4	Mib1	E3 ubiquitin-protein ligase MIB1	6.16e-15	187	29.412	Q804S5	mib1	E3 ubiquitin-protein ligase mib1	1.08e-14	187	29.412	Q9VUX2	mib1	E3 ubiquitin-protein ligase mind-bomb	1.45e-11	194	26.289	P17221
dd_Smed_v6_3611_0_1	NA	ABCD1	ATP-binding cassette sub-family D member 1	2309	2.25984	5.85896	3.09e-18	1.98175	5.85896	2.18e-14	4.78937	3.94972	1.21258	darkblue	Contig2577	1.76058	7.9434	6.06e-05	NA	24,30	Epidermal,Intestine	4	NA	NA	P33897	ABCD1	ATP-binding cassette sub-family D member 1	0	602	53.488	Q61285	Abcd2	ATP-binding cassette sub-family D member 2	0	612	54.902	F1RBC8	abcd1	ATP-binding cassette, sub-family D (ALD), member 1	0	620	54.032	Q7JUN3	Dmel\CG2316	CG2316, isoform A	0	598	53.679	Q19733
dd_Smed_v6_3616_0_1	trpml	MCOLN2	Mucolipin-2	2397	2.86827	5.37219	1.76e-20	2.902	5.37219	7.54e-21	7.3019	7.47462	0.976892	dodgerblue	PL06014B2E11	0.644961	6.85249	0.00696577	uniform	30,31	Intestine,Cathepsin+ cell	4	pigment	NA	Q8IZK6	MCOLN2	Mucolipin-2	1.65e-60	486	31.481	Q8R4F0	Mcoln3	Mucolipin-3	1.5e-63	469	32.623	K9JZ38	mcoln1a	Mucolipin 1.1	2.29e-67	467	34.261	Q9VW35	Trpml	SD02261p	4.56e-71	467	34.69	D7UU24
dd_Smed_v6_3630_0_1	NA	APMAP	Adipocyte plasma membrane-associated protein	1465	1.94391	5.10734	6.81e-06	1.71877	5.10734	8.36e-05	3.84748	3.29155	1.1689	darkblue	NA	NA	NA	NA	NA	NA	NA	NA	NA	NA	Q9HDC9	APMAP	Adipocyte plasma membrane-associated protein	7.73e-63	360	36.111	Q9D7N9	Apmap	Adipocyte plasma membrane-associated protein	1.13e-64	360	36.944	Q803F5	apmap	Adipocyte plasma membrane-associated protein	6.46e-68	358	37.151	Q58SN4	Hmu	Hemomucin	3.79e-38	372	30.645	O62265
dd_Smed_v6_3632_0_1	tnx	TNXB	Tenascin-X	1042	5.65803	8.55818	2e-53	5.36545	8.55818	2.1e-49	50.4938	41.2252	1.22483	darkblue	Contig505	3.90745	11.7722	4.9e-05	uniform; marginal cells; scarf	10,17,30	Cathepsin+ cell,Intestine	7	NA	Gut	P22105	TNXB	Tenascin-X	0.000893	122	26.23	O54796	Tnx	Tenascin-X	0.000112	205	25.366	NA	NA	NA	NA	NA	NA	NA	NA	NA	NA	NA	NA	NA
dd_Smed_v6_3637_0_1	NA	WASHC3	WASH complex subunit 3	637	1.38447	3.77194	0.00307817	1.26485	3.77194	0.00844354	2.61076	2.40303	1.08644	darkblue	NA	NA	NA	NA	NA	NA	NA	NA	NA	NA	Q9Y3C0	WASHC3	WASH complex subunit 3	8.77e-16	170	28.824	Q9CR27	Washc3	WASH complex subunit 3	1.63e-17	170	30	Q5RGJ6	washc3	WASH complex subunit 3	3.7e-15	173	27.168	Q9VLT8	CCDC53	WASH complex subunit 3	6.86e-11	161	27.329	NA
dd_Smed_v6_3638_0_1	cbt	KLF13	Krueppel-like factor 13	1642	2.18316	4.10063	3.86e-07	2.01296	4.10063	3.39e-06	4.54146	4.03609	1.12521	darkblue	Contig3093	0.41776	8.47344	0.0317406	uniform low; noisy	40	Protonephridia	5	NA	NA	Q9Y2Y9	KLF13	Krueppel-like factor 13	2.01e-34	88	60.227	Q8K1S5	Klf11	Krueppel-like factor 11	3.46e-34	93	56.989	F1R5X2	klf11b	Kruppel-like factor 11b	2.59e-36	172	43.605	Q8IPV7	cbt	Cabut, isoform B	2.47e-41	214	41.589	P91329
dd_Smed_v6_3650_0_1	NA	TRAF5	TNF receptor-associated factor 5	1403	2.49156	6.18975	1.59e-20	2.3135	6.18975	5.86e-18	5.62385	4.97089	1.13136	darkblue	Contig407	1.82055	8.52064	3.8e-05	NA	NA	NA	NA	NA	NA	O00463	TRAF5	TNF receptor-associated factor 5	2.2e-13	165	32.727	P70191	Traf5	TNF receptor-associated factor 5	6.88e-13	173	30.058	Q6IWL4	traf6	TNF receptor-associated factor 6	6.26e-11	261	24.521	NA	NA	NA	NA	NA	NA	G5EG80
dd_Smed_v6_3657_0_1	NA	PHKB	Phosphorylase b kinase regulatory subunit beta	3402	1.10083	5.0877	0.00144091	0.852325	5.0877	0.0191751	2.14478	1.80541	1.18798	darkblue	NA	NA	NA	NA	NA	23	Neural	NA	NA	NA	Q93100	PHKB	Phosphorylase b kinase regulatory subunit beta	0	1088	41.452	Q7TSH2	Phkb	Phosphorylase b kinase regulatory subunit beta	0	1084	41.052	F1Q6F0	phkb	Phosphorylase kinase, beta	0	1090	41.193	Q9VLS1	CG8475	Probable phosphorylase b kinase regulatory subunit beta	0	1075	41.581	H2L0I6
dd_Smed_v6_3659_0_1	NA	NA	NA	2403	1.0033	4.78715	0.00147671	0.964836	4.78715	0.0026717	2.00457	1.95184	1.02702	darkblue	NA	NA	NA	NA	NA	6,10,28,31,42	Intestine,Cathepsin+ cell	0,7	pigment	NA	NA	NA	NA	NA	NA	NA	NA	NA	NA	NA	NA	NA	NA	NA	NA	NA	NA	NA	Q8I7P9	pol	Retrovirus-related Pol polyprotein from transposon opus	2.96e-12	118	34.746	Q17394
dd_Smed_v6_366_0_1	NA	PGD	6-phosphogluconate dehydrogenase, decarboxylating	2072	2.23396	8.04867	4.6e-10	2.07877	8.04867	7.67e-09	4.70423	4.22448	1.11357	darkblue	Contig1749	1.59772	11.6765	0.000149482	NA	6,11,24,25,27,29,30,31,33,35,37	Intestine,Epidermal,Pharynx,Protonephridia,Cathepsin+ cell,Neural	4,7	late epidermal progenitors 2,epidermis DVb,pharynx cell type,phagocytes	NA	P52209	PGD	6-phosphogluconate dehydrogenase, decarboxylating	0	483	67.909	Q9DCD0	Pgd	6-phosphogluconate dehydrogenase, decarboxylating	0	483	67.495	NA	NA	NA	NA	NA	NA	P41572	Pgd	6-phosphogluconate dehydrogenase, decarboxylating	0	481	65.281	Q17761
dd_Smed_v6_3661_0_1	NA	COG7	Conserved oligomeric Golgi complex subunit 7	2408	1.05317	5.14874	0.000789069	0.95351	5.14874	0.00302003	2.07509	1.93658	1.07152	darkblue	NA	NA	NA	NA	NA	NA	NA	NA	NA	NA	P83436	COG7	Conserved oligomeric Golgi complex subunit 7	2.1e-64	777	25.74	Q3UM29	Cog7	Conserved oligomeric Golgi complex subunit 7	4.74e-62	786	25.7	Q08BK1	cog7	Component of oligomeric golgi complex 7	1.09e-70	766	26.371	Q9VAD6	Cog7	Conserved oligomeric Golgi complex subunit 7	5.88e-44	772	23.705	NA
dd_Smed_v6_3667_0_1	NA	MST4	Serine/threonine protein kinase MST4	2450	1.59872	6.89196	7.66e-08	1.38846	6.89196	3.94e-06	3.02874	2.618	1.15689	darkblue	Contig4602	0.735136	8.76252	0.00892205	NA	6,10,15,17,30,31,38,39	Intestine,Cathepsin+ cell,Parapharyngeal	7	aqp+ parenchymal cells	NA	Q499L9	MST4	Serine/threonine protein kinase MST4	3.24e-15	162	30.247	Q99JT2	Stk26	Serine/threonine-protein kinase 26	7.75e-15	162	30.247	F1Q6B7	stk25b	Serine/threonine kinase 25b	5.77e-15	156	30.769	P13677	inaC	Protein kinase C, eye isozyme	8.04e-15	135	33.333	G5EGQ3
dd_Smed_v6_3672_0_1	NA	TSPO	Translocator protein	615	1.33121	5.61798	6.06e-07	1.26946	5.61798	2.39e-06	2.51613	2.41071	1.04373	darkblue	Contig310	-0.232342	8.32695	0.276242	NA	6	Intestine	NA	NA	NA	P30536	TSPO	Translocator protein	1.22e-38	142	41.549	P50637	Tspo	Translocator protein	3.76e-38	145	41.379	Q5XJB6	tspo	Translocator protein	1.49e-33	146	37.671	Q9VPR1	Tspo	GH02075p	1.74e-35	157	39.49	NA
dd_Smed_v6_3673_0_1	NA	AGMO	Alkylglycerol monooxygenase	1625	3.88192	7.87452	5.58e-40	3.81615	7.87452	7.47e-39	14.7426	14.0856	1.04664	darkblue	Contig4154	2.68188	9.08241	2.76e-05	NA	30	Intestine	4	NA	NA	Q6ZNB7	AGMO	Alkylglycerol monooxygenase	1.48e-108	371	47.439	Q8BS35	Agmo	Alkylglycerol monooxygenase	1.15e-110	375	47.467	Q6NYE4	agmo	Alkylglycerol monooxygenase	7.69e-101	386	44.56	NA	NA	NA	NA	NA	NA	O17554
dd_Smed_v6_3685_0_1	NA	MARK2	Serine/threonine-protein kinase MARK2	4920	0.772359	5.01617	0.0212782	1.00847	5.01617	0.00213635	1.70806	2.01177	0.849034	dodgerblue	PL06011A1F01	-0.0280095	5.89455	0.39527	NA	8,9,13,20,21	Neural,Muscle	NA	NA	NA	Q7KZI7	MARK2	Serine/threonine-protein kinase MARK2	1.76e-177	350	73.429	Q05512	Mark2	Serine/threonine-protein kinase MARK2	5.35e-176	333	75.075	A2CEF7	mark3b	Non-specific serine/threonine protein kinase	9.06e-174	360	70.556	Q963E6	par-1	Par-1, isoform W	1.17e-177	343	73.469	Q9TW45
dd_Smed_v6_3687_0_1	NA	ITPKB	Inositol-trisphosphate 3-kinase B	2231	1.58021	5.40378	2.71e-08	1.64803	5.40378	7.45e-09	2.99013	3.13406	0.954076	dodgerblue	NA	NA	NA	NA	NA	2,27	Epidermal,Pharynx	NA	NA	NA	P27987	ITPKB	Inositol-trisphosphate 3-kinase B	5.9e-95	306	51.307	Q7TS72	Itpkc	Inositol-trisphosphate 3-kinase C	1.06e-98	303	50.165	F1QYS5	itpkcb	Kinase	1.99e-98	323	49.536	Q9VYE7	IP3K2	Kinase	4.45e-111	344	50	Q95Q62
dd_Smed_v6_3689_0_1	NA	NA	NA	1386	6.3573	6.89822	9.83e-65	6.20946	6.89822	2.16e-62	81.9855	74.0003	1.10791	darkblue	Contig3663	2.81957	9.22364	2.29e-05	NA	30	Intestine	4	NA	NA	NA	NA	NA	NA	NA	NA	NA	NA	NA	NA	NA	NA	NA	NA	NA	NA	NA	NA	NA	NA	NA	NA	NA	NA	NA
dd_Smed_v6_3690_0_1	NA	-	cDNA FLJ60119, highly similar to Homo sapiens serine/threonine kinase 11 interacting protein (STK11IP), mRNA	3358	1.67045	3.46338	0.000175242	2.0688	3.46338	3.34e-06	3.18313	4.19537	0.758725	dodgerblue	NA	NA	NA	NA	NA	30	Intestine	4	NA	NA	B4DKM2	-	cDNA FLJ60119, highly similar to Homo sapiens serine/threonine kinase 11 interacting protein (STK11IP), mRNA	1.53e-14	223	27.803	Q3TAA7	Stk11ip	Serine/threonine-protein kinase 11-interacting protein	7.08e-11	226	29.204	F1Q5L2	stk11ip	Serine/threonine kinase 11-interacting protein	2.31e-15	287	27.526	Q9VMK9	CG9044	CG9044, isoform B	5.6e-15	200	29.5	Q17692
dd_Smed_v6_3693_0_1	NA	ANKRD52	Serine/threonine-protein phosphatase 6 regulatory ankyrin repeat subunit C	2671	0.847386	5.94838	0.00629069	1.10373	5.94838	0.000284987	1.79924	2.1491	0.837204	dodgerblue	Contig4824	-0.0817692	6.3596	0.668715	NA	NA	NA	NA	NA	NA	Q8NB46	ANKRD52	Serine/threonine-protein phosphatase 6 regulatory ankyrin repeat subunit C	3.35e-10	291	25.773	Q9EP71	Rai14	Ankycorbin	8.88e-10	239	26.778	F1R7I3	trpa1a	Transient receptor potential cation channel, subfamily A, member 1a	1.26e-10	287	25.087	M9MRS5	Ank2	Ankyrin 2, isoform R	6.42e-09	229	25.764	G5ECZ1
dd_Smed_v6_370_0_1	NA	TFPI2	Tissue factor pathway inhibitor 2	295	4.12271	9.13182	1.06e-23	6.56403	9.13182	4.24e-47	17.4205	94.6173	0.184115	darkorange	Contig7333	-1.3636	9.00258	0.0088952	NA	NA	NA	5	NA	NA	P48307	TFPI2	Tissue factor pathway inhibitor 2	1.63e-08	51	43.137	F6ULY1	Wfdc6b	WAP four-disulfide core domain protein 6B	6.25e-09	52	44.231	F1Q924	col6a4a	Collagen, type VI, alpha 4a	5.74e-07	52	38.462	Q868Z9	Ppn	Papilin	8.42e-06	51	39.216	H2KZ67
dd_Smed_v6_3706_0_1	NA	TRAF3	TNF receptor-associated factor 3	1638	1.17197	5.81654	0.000168542	0.98115	5.81654	0.0022426	2.25319	1.97404	1.14141	darkblue	Contig52	0.680472	7.15845	0.01071	NA	NA	NA	NA	NA	NA	Q13114	TRAF3	TNF receptor-associated factor 3	1.15e-21	350	26.571	Q60803	Traf3	TNF receptor-associated factor 3	2.33e-21	405	26.173	Q6DEG0	traf3	TNF receptor-associated factor 3	6.94e-19	353	22.38	Q9W3I9	Traf6	GH01161p	5.03e-10	422	18.957	G5EG80
dd_Smed_v6_3711_0_1	NA	PRKACB	cAMP-dependent protein kinase catalytic subunit beta	1320	6.25488	4.90196	5.13e-55	6.22882	4.90196	1.33e-54	76.3673	75.0003	1.01823	darkblue	Contig892	1.4153	8.41289	0.00197097	NA	6,30	Intestine	4,7	NA	NA	P22694	PRKACB	cAMP-dependent protein kinase catalytic subunit beta	3.31e-88	320	45.312	P68181	Prkacb	cAMP-dependent protein kinase catalytic subunit beta	1.2e-89	320	45.938	A0A0R4IB41	prkacbb	Protein kinase, cAMP-dependent, catalytic, beta b	6.5e-88	320	45.625	P12370	Pka-C1	cAMP-dependent protein kinase catalytic subunit	3.25e-84	340	44.118	P21137
dd_Smed_v6_3712_0_1	NA	SQSTM1	Sequestosome-1	1340	1.59631	5.19224	1.46e-06	1.61132	5.19224	1.33e-06	3.02368	3.05532	0.989643	dodgerblue	PL030015A10F05	1.70886	8.07752	0.00126701	NA	10,15,17,39	Cathepsin+ cell	NA	NA	NA	Q13501	SQSTM1	Sequestosome-1	1.51e-06	77	25.974	A2CI98	Dytn	Dystrotelin	1.84e-07	49	48.98	E7EYK8	herc2	HECT and RLD domain-containing E3 ubiquitin protein ligase 2	1.25e-05	55	43.636	Q8I8V0	Ada2b	Transcriptional adapter 2B	5.89e-05	69	36.232	F1LIM5
dd_Smed_v6_3713_0_1	NA	CNIH1	Protein cornichon homolog 1	933	1.01274	5.61035	0.000587658	1.12952	5.61035	0.000125142	2.01773	2.18786	0.922242	dodgerblue	Contig2813	0.103576	8.82148	0.484845	NA	NA	NA	NA	NA	NA	O95406	CNIH1	Protein cornichon homolog 1	8.24e-47	122	62.295	O35372	Cnih1	Protein cornichon homolog 1	9.07e-47	122	62.295	B8A6D8	cnih1	Cornichon family AMPA receptor auxiliary protein 1	3.58e-46	122	62.295	P49858	cni	Protein cornichon	1.07e-45	122	59.836	Q22361
dd_Smed_v6_3716_0_1	NA	SPG11	Spatacsin	6887	1.60331	5.12415	5e-09	1.76189	5.12415	1.39e-10	3.0384	3.39143	0.895905	dodgerblue	NA	NA	NA	NA	NA	28,30	Cathepsin+ cell,Intestine	4	NA	NA	C4B7M4	SPG11	Spatacsin	4.49e-21	339	26.254	Q3UHA3	Spg11	Spatacsin	6.51e-23	340	26.765	F1R072	spg11	Spastic paraplegia 11	4.12e-26	344	27.035	Q8MRS0	CG13531	AT20659p	1.71e-12	179	31.285	NA
dd_Smed_v6_3727_0_1	NA	NA	NA	1093	1.59981	5.35867	1.2e-07	1.59994	5.35867	1.39e-07	3.03102	3.03131	0.999904	dodgerblue	Contig3262	1.14656	8.68671	0.000297149	NA	NA	NA	NA	NA	NA	NA	NA	NA	NA	NA	NA	NA	NA	NA	NA	NA	NA	NA	NA	NA	NA	NA	NA	NA	NA	NA	NA	NA	NA	NA
dd_Smed_v6_3728_0_1	klk13	KLK13	Kallikrein-13	970	7.17688	5.6549	3.02e-36	3.71991	5.6549	1.8e-13	144.695	13.1766	10.9812	darkgreen	Contig2396	-0.725629	7.50281	0.0477699	goblet	NA	NA	NA	NA	NA	Q9UKR3	KLK13	Kallikrein-13	2.28e-26	228	32.456	B7ZP17	Gzmm	Gzmm protein	3.43e-25	240	31.667	Q4V9I6	zgc:112285	Zgc:112285	2.19e-25	278	31.295	Q9W2C8	CG4386	CG4386	5.68e-24	248	29.839	Q17800
dd_Smed_v6_3737_0_1	NA	ARHGAP25	Rho GTPase-activating protein 25	1617	1.42177	4.85577	3.19e-06	0.950816	4.85577	0.00289399	2.67914	1.93297	1.38602	darkblue	PL06022B2B05	0.424986	6.39018	0.020166	NA	10,17,28,29,39,40	Cathepsin+ cell,Protonephridia	NA	NA	NA	P42331	ARHGAP25	Rho GTPase-activating protein 25	0.000156	109	29.358	B2RPU2	Plekhd1	Pleckstrin homology domain-containing family D member 1	6.28e-13	138	26.812	F1R8V5	si:ch211-193c2.2	Si:ch211-193c2.2	2.41e-06	118	27.966	NA	NA	NA	NA	NA	NA	NA
dd_Smed_v6_3738_0_1	NA	NA	NA	955	1.05587	4.14246	0.00809271	0.954119	4.14246	0.0205304	2.07897	1.9374	1.07307	darkblue	PL05001B2A12	0.474327	7.53434	0.0390757	NA	11,24	Epidermal	7	NA	NA	NA	NA	NA	NA	NA	NA	NA	NA	NA	NA	NA	NA	NA	NA	NA	NA	NA	NA	NA	NA	NA	NA	NA	NA	NA
dd_Smed_v6_37526_0_1	NA	NA	NA	309	4.59243	1.76285	8.83e-07	4.27694	1.76285	4.55e-06	24.1245	19.386	1.24443	darkblue	NA	NA	NA	NA	NA	NA	NA	NA	NA	NA	NA	NA	NA	NA	NA	NA	NA	NA	NA	NA	NA	NA	NA	NA	NA	NA	NA	NA	NA	NA	NA	NA	NA	NA	NA
dd_Smed_v6_3754_0_1	NA	ELMO2	Engulfment and cell motility protein 2	2565	1.10134	5.54931	0.00015658	1.18934	5.54931	4.68e-05	2.14553	2.28049	0.940822	dodgerblue	Contig1935	1.13204	7.70939	0.000257318	NA	10,15,17,28,39,41	Cathepsin+ cell	NA	NA	Cathepsin+ b	Q5JVZ5	ELMO2	Engulfment and cell motility protein 2	8.02e-26	391	27.877	Q8BHL5	Elmo2	Engulfment and cell motility protein 2	1.14e-25	390	27.949	A0A0R4IHP8	elmo1	Engulfment and cell motility 1 (ced-12 homolog, C. elegans)	4.1e-22	395	26.582	Q8MS15	Ced-12	RE62284p	1.1e-20	416	25.721	NA
dd_Smed_v6_3760_0_1	NA	SEC24B	Protein transport protein Sec24B	3089	1.81751	4.3291	2.9e-07	1.65067	4.3291	3.91e-06	3.52472	3.13978	1.1226	darkblue	NA	NA	NA	NA	NA	NA	NA	NA	NA	NA	O95487	SEC24B	Protein transport protein Sec24B	0	812	37.931	Q3U2P1	Sec24a	Protein transport protein Sec24A	0	774	39.664	D5LMH4	sec24d	Protein transport protein Sec24D	2.48e-83	751	26.764	A0A0B4LEK8	Sec24AB	Sec24AB ortholog, isoform C	7.38e-178	805	38.261	NA
dd_Smed_v6_3768_0_1	NA	HMCN1	Hemicentin-1	1513	1.58113	4.96153	8.25e-06	1.40606	4.96153	9.2e-05	2.99204	2.65013	1.12902	darkblue	NA	NA	NA	NA	NA	17,37,40	Cathepsin+ cell,Pharynx,Protonephridia	NA	NA	NA	Q96RW7	HMCN1	Hemicentin-1	4.72e-15	317	25.552	P12960	Cntn1	Contactin-1	3.51e-14	331	25.076	E7F3V2	hmcn2	Hemicentin 2	4.88e-16	327	25.994	Q24372	Lac	Lachesin	1.09e-18	265	27.925	G5EG33
dd_Smed_v6_3769_0_1	NA	RABGGTB	Geranylgeranyl transferase type-2 subunit beta	1243	2.32406	2.17021	0.00602759	2.33275	2.17021	0.00661256	5.0074	5.03763	0.993999	dodgerblue	PL06021A1G10	0.253462	7.85129	0.202568	NA	NA	NA	NA	NA	NA	P53611	RABGGTB	Geranylgeranyl transferase type-2 subunit beta	2.38e-120	347	51.873	P53612	Rabggtb	Geranylgeranyl transferase type-2 subunit beta	1.79e-118	341	51.613	Q4V946	rabggtb	Rab geranylgeranyltransferase, beta subunit	1.27e-122	347	53.602	Q9XZ68	betaggt-II	Beta subunit of type II geranylgeranyl transferase	1.88e-108	328	50	P41992
dd_Smed_v6_377_0_1	NA	CACYBP	Calcyclin-binding protein	787	1.16679	5.12372	0.00718571	1.28984	5.12372	0.00302881	2.24512	2.445	0.918247	dodgerblue	Contig2283	-0.00355216	7.16861	0.757234	NA	0,5,22	Neoblast	NA	NA	Cluster 1	Q9HB71	CACYBP	Calcyclin-binding protein	1.05e-30	211	34.123	Q9CXW3	Cacybp	Calcyclin-binding protein	1.12e-32	215	34.884	NA	NA	NA	NA	NA	NA	Q9W3Y3	CG3226	CG3226	1.3e-25	215	32.093	NA
dd_Smed_v6_3770_0_1	NA	IDH1	Isocitrate dehydrogenase [NADP] cytoplasmic	1458	2.70498	6.30108	7.13e-19	2.7635	6.30108	1.56e-19	6.52047	6.79044	0.960243	dodgerblue	Contig2219	0.0496086	8.05769	0.686225	NA	6,19	Intestine	NA	NA	NA	O75874	IDH1	Isocitrate dehydrogenase [NADP] cytoplasmic	0	410	73.902	O88844	Idh1	Isocitrate dehydrogenase [NADP] cytoplasmic	0	410	74.146	B0UXL2	idh1	Isocitrate dehydrogenase [NADP]	0	416	71.875	Q7KUB1	Idh	Isocitrate dehydrogenase [NADP]	0	409	70.416	NA
dd_Smed_v6_3775_0_1	NA	USP20	Ubiquitin carboxyl-terminal hydrolase 20	2524	1.10865	5.10387	0.000945161	0.96641	5.10387	0.00517941	2.15644	1.95397	1.10362	darkblue	NA	NA	NA	NA	NA	NA	NA	NA	NA	NA	Q9Y2K6	USP20	Ubiquitin carboxyl-terminal hydrolase 20	4.47e-113	463	39.957	Q8C6M1	Usp20	Ubiquitin carboxyl-terminal hydrolase 20	1.15e-111	484	39.05	A5PN09	usp20	Ubiquitin carboxyl-terminal hydrolase 20	9.2e-115	490	40	Q7JW61	Usp20-33	LD43649p	4.99e-96	481	37.214	Q9GRV2
dd_Smed_v6_3794_0_1	NA	PANK1	Pantothenate kinase 1	1197	6.07571	5.67945	1.91e-44	5.81884	5.67945	1.11e-41	67.4484	56.4477	1.19488	darkblue	Contig5175	2.23037	8.17955	5.98e-05	NA	30	Intestine	4	NA	NA	Q8TE04	PANK1	Pantothenate kinase 1	3.47e-07	157	26.752	Q8R2W9	Pank3	Pantothenate kinase 3	1.71e-08	188	26.064	B8A4W8	pank2	Pantothenate kinase 2	2.23e-09	189	26.984	D8FT20	fbl	Fumble, isoform F	3.38e-12	194	28.866	NA
dd_Smed_v6_3795_0_1	novel	NA	NA	1789	2.13328	5.60716	7.05e-12	2.02951	5.60716	7.94e-11	4.38714	4.08266	1.07458	darkblue	Contig5226	0.430993	6.54435	0.0101504	uniform; CNS; pharynx	1,8,9,18,20,21,23,25,27,34,37	Neural,Pharynx	7	spp-11+ neurons,ChAT neurons 2	Neural 2	NA	NA	NA	NA	NA	NA	NA	NA	NA	NA	NA	NA	NA	NA	NA	NA	NA	NA	NA	NA	NA	NA	NA	NA	NA
dd_Smed_v6_3798_0_1	NA	MAPK8IP3	C-Jun-amino-terminal kinase-interacting protein 3	3515	1.33936	4.37293	7.24e-06	1.41933	4.37293	2.12e-06	2.53039	2.67461	0.946077	dodgerblue	NA	NA	NA	NA	NA	10,15,28,31	Cathepsin+ cell	NA	aqp+ parenchymal cells,ldlrr-1+ parenchymal cells,psap+ parenchymal cells	NA	Q9UPT6	MAPK8IP3	C-Jun-amino-terminal kinase-interacting protein 3	9.72e-107	978	28.732	Q58A65	Spag9	C-Jun-amino-terminal kinase-interacting protein 4	9.79e-70	370	38.378	E7F4K5	-	Uncharacterized protein	3.81e-70	365	37.534	Q9GQF1	syd	JNK-interacting protein 3	3.99e-61	317	38.17	P34609
dd_Smed_v6_3804_0_1	NA	ACOX3	Peroxisomal acyl-coenzyme A oxidase 3	2283	2.59904	4.58872	5.03e-09	2.56414	4.58872	9.43e-09	6.05884	5.91402	1.02449	darkblue	Contig905	1.59734	8.69411	0.000239303	NA	NA	NA	NA	NA	NA	O15254	ACOX3	Peroxisomal acyl-coenzyme A oxidase 3	0	692	44.942	Q9EPL9	Acox3	Peroxisomal acyl-coenzyme A oxidase 3	0	688	46.802	F1QXK3	acox3	Acyl-coenzyme A oxidase	0	689	47.605	Q9VMD7	CG9527	Acyl-coenzyme A oxidase	3.67e-177	701	42.083	Q20992
dd_Smed_v6_3808_0_1	NA	RGN	Regucalcin	1132	2.42306	5.21407	3.38e-07	2.55625	5.21407	9.04e-08	5.36306	5.88177	0.91181	dodgerblue	Contig6410	-0.0443018	6.80561	0.80917	NA	6,10,19,28,31	Intestine,Cathepsin+ cell	0,7	NA	NA	Q15493	RGN	Regucalcin	2.2e-44	301	33.887	Q64374	Rgn	Regucalcin	1.41e-48	299	35.117	Q6TLF6	rgn	Regucalcin	7.97e-46	286	33.217	Q9NDS6	smp-30	Senescence marker protein-30 (SMP-30)	1.86e-33	300	31	NA
dd_Smed_v6_3811_0_1	NA	NA	NA	1466	1.37415	5.23909	9.53e-07	1.25065	5.23909	1.04e-05	2.59215	2.37949	1.08937	darkblue	Contig2840	0.644241	8.94991	0.0163313	NA	9,20,21,25,27,37	Neural,Pharynx	NA	pharynx cell type	NA	NA	NA	NA	NA	NA	NA	NA	NA	NA	NA	NA	NA	NA	NA	NA	NA	NA	NA	NA	NA	NA	NA	NA	NA	NA
dd_Smed_v6_3817_0_1	NA	DDX3Y	ATP-dependent RNA helicase DDX3Y	2049	1.28497	5.11051	1.98e-05	1.11035	5.11051	0.000298728	2.43677	2.15898	1.12867	darkblue	Contig4698	0.953881	8.14483	0.000528511	NA	20,21,24	Neural,Epidermal	NA	NA	NA	O15523	DDX3Y	ATP-dependent RNA helicase DDX3Y	0	474	60.759	Q62095	Ddx3y	ATP-dependent RNA helicase DDX3Y	0	475	61.053	B0S6P6	ddx3a	DEAD (Asp-Glu-Ala-Asp) box helicase 3a	0	481	60.915	Q9VHP0	bel	ATP-dependent RNA helicase bel	1.77e-170	445	60	D0PV95
dd_Smed_v6_3820_0_1	NA	NA	NA	2428	1.38868	6.28636	9e-06	1.25532	6.28636	7.53e-05	2.61839	2.38721	1.09684	darkblue	Contig195	0.885107	6.92587	0.00196403	NA	6,10,17,26,28,29,30,31,39	Intestine,Cathepsin+ cell,Protonephridia	4,7	aqp+ parenchymal cells	NA	NA	NA	NA	NA	NA	NA	NA	NA	NA	NA	NA	NA	NA	NA	NA	NA	NA	NA	NA	NA	NA	NA	NA	NA	NA
dd_Smed_v6_3821_0_1	NA	SLC2A4RG	SLC2A4 regulator	1643	4.09929	5.80063	4.05e-34	4.15679	5.80063	7.3e-35	17.1399	17.8368	0.960927	dodgerblue	Contig3306	2.78908	8.15807	3.98e-05	NA	30	Intestine	4	NA	NA	Q9NR83	SLC2A4RG	SLC2A4 regulator	1.67e-08	29	65.517	Q9ERQ3	Znf704	Zinc finger protein 704	5.61e-08	28	64.286	F1QZA2	si:rp71-79p20.2	Si:rp71-79p20.2	1.02e-08	48	47.917	A0A0B4KFN3	Glut4EF	Glut4EF, isoform G	7.63e-10	40	62.5	NA
dd_Smed_v6_3824_0_1	serpinb3a	SERPINB13	Serpin B13	1223	1.07394	6.56819	0.000247214	0.806388	6.56819	0.00874986	2.10517	1.74883	1.20376	darkblue	Contig6228	0.870433	8.82863	0.0280488	uniform	25,27,37	Pharynx	7	NA	NA	Q9UIV8	SERPINB13	Serpin B13	7.12e-53	382	30.105	Q8BG86	Serpinb3a	Serine (Or cysteine) peptidase inhibitor, clade B (Ovalbumin), member 3A	3.93e-55	373	31.099	Q7T309	serpinb1l3	Serpin peptidase inhibitor, clade B (Ovalbumin), member 1, like 3	9.41e-50	379	30.343	Q7JV69	Spn55B	SD11922p	1.12e-42	353	30.312	A9Z1L1
dd_Smed_v6_3825_1_1	NA	NA	NA	2629	1.04414	5.07562	0.00124475	1.01585	5.07562	0.00199729	2.06214	2.0221	1.0198	darkblue	Contig2424	0.843242	7.9139	0.000931478	NA	15,17,30	Cathepsin+ cell,Intestine	4	NA	NA	NA	NA	NA	NA	NA	NA	NA	NA	NA	NA	NA	NA	NA	NA	NA	NA	NA	NA	NA	NA	NA	NA	NA	NA	NA
dd_Smed_v6_3838_0_1	NA	PRKX	cAMP-dependent protein kinase catalytic subunit PRKX	1265	1.48891	5.25114	4.13e-05	1.15224	5.25114	0.00213527	2.80677	2.22258	1.26284	darkblue	Contig6448	1.24158	8.7418	0.000862276	NA	17,28,31	Cathepsin+ cell	NA	NA	NA	P51817	PRKX	cAMP-dependent protein kinase catalytic subunit PRKX	1.26e-142	316	59.494	Q922R0	Prkx	cAMP-dependent protein kinase catalytic subunit PRKX	8.87e-138	333	55.856	Q3ZB92	prkacbb	Protein kinase, cAMP-dependent, catalytic, beta	6.19e-116	331	49.849	P16912	Pka-C3	Protein kinase DC2	7.43e-142	316	59.81	Q7JP68
dd_Smed_v6_3839_0_1	NA	SFT2D1	Vesicle transport protein SFT2A	2246	1.18277	4.0645	0.00194337	0.935439	4.0645	0.0196721	2.27012	1.91247	1.18701	darkblue	NA	NA	NA	NA	NA	NA	NA	NA	NA	NA	Q8WV19	SFT2D1	Vesicle transport protein SFT2A	9.73e-48	137	59.124	Q5SSN7	Sft2d1	Vesicle transport protein SFT2A	7.17e-49	131	61.069	F1QQJ6	sft2d1	Vesicle transport protein	8.01e-49	137	63.504	Q9VPD4	BcDNA:RH26504	Vesicle transport protein	8.51e-39	139	53.957	Q7YTP0
dd_Smed_v6_3842_2_1	cg6153	PITHD1	PITH domain-containing protein 1	776	1.59341	4.12652	8.56e-07	1.53863	4.12652	2.39e-06	3.01763	2.90518	1.03871	darkblue	Contig5009	-0.000913133	7.65731	0.621286	uniform	NA	NA	NA	NA	NA	Q9GZP4	PITHD1	PITH domain-containing protein 1	5.02e-44	194	40.206	Q8BWR2	Pithd1	PITH domain-containing protein 1	3.68e-43	194	39.691	Q6NYX8	pithd1	PITH domain-containing protein 1	2.92e-40	181	41.436	Q9VK68	CG6153	PITH domain-containing protein CG6153	5.32e-45	202	42.079	Q95ZI6
dd_Smed_v6_3864_0_1	NA	CAPN5	Calpain-5	2034	1.05087	4.60046	0.000621544	0.94935	4.60046	0.00254119	2.07177	1.931	1.0729	darkblue	NA	NA	NA	NA	NA	11,19	Epidermal,Intestine	2,5	NA	NA	O15484	CAPN5	Calpain-5	1.71e-109	651	33.641	O08688	Capn5	Calpain-5	2.56e-109	653	33.844	F1Q7N2	capn5a	Calpain 5a	3.75e-113	661	32.375	Q11002	CalpA	Calpain-A	1.25e-64	506	32.806	Q22036
dd_Smed_v6_3869_0_1	NA	NA	NA	1717	1.12537	5.96806	0.00015403	0.776311	5.96806	0.0139759	2.18157	1.71275	1.27373	darkblue	PL06019B2B02	0.334314	7.14715	0.0535576	NA	4,10,15,17,27,28,37,39	Cathepsin+ cell,Pharynx	NA	NA	NA	NA	NA	NA	NA	NA	NA	NA	NA	NA	NA	NA	NA	NA	NA	NA	NA	NA	NA	NA	NA	NA	NA	NA	NA	NA
dd_Smed_v6_3874_0_1	NA	SLC30A1	Zinc transporter 1	1597	1.4043	3.71354	0.000403151	1.26893	3.71354	0.00174886	2.64689	2.40982	1.09838	darkblue	Contig4558	0.550147	8.16284	0.00394013	NA	NA	NA	NA	NA	NA	Q9Y6M5	SLC30A1	Zinc transporter 1	3.78e-55	510	33.333	Q3UVU3	Slc30a10	Zinc transporter 10	5.83e-47	428	32.243	Q6P3M0	slc30a1a	Solute carrier family 30 (Zinc transporter), member 1	1.02e-29	254	35.039	Q7K3K5	ZnT63C	LD22804p	5.67e-19	93	51.613	Q95QW4
dd_Smed_v6_388_0_1	NA	DNM1L	Dynamin-1-like protein	2562	2.37389	8.01078	1.86e-09	2.22357	8.01078	2.08e-08	5.18337	4.67049	1.10981	darkblue	Contig6476	3.0519	9.48558	0.00182368	NA	10,15,17,28,30,39,41	Cathepsin+ cell,Intestine	4	phagocytes,aqp+ parenchymal cells,ldlrr-1+ parenchymal cells,psap+ parenchymal cells	Gut	O00429	DNM1L	Dynamin-1-like protein	1.34e-136	755	36.291	Q8K1M6	Dnm1l	Dynamin-1-like protein	8.47e-136	762	35.958	Q7SXN5	dnm1l	Dynamin-1-like protein	1.35e-136	747	36.011	Q9VQE0	Drp1	Dynamin related protein 1, isoform A	2.76e-126	752	34.707	G5EDY8
dd_Smed_v6_3889_0_1	NA	RAB4B	Ras-related protein Rab-4B	987	2.47847	4.80438	1.5e-14	2.56677	4.80438	2.12e-15	5.57306	5.92483	0.940627	dodgerblue	Contig3665	2.09548	9.20143	5.89e-05	NA	10,15,17,28,29,30	Cathepsin+ cell,Protonephridia,Intestine	4	NA	NA	P61018	RAB4B	Ras-related protein Rab-4B	6.82e-25	156	33.974	Q91ZR1	Rab4b	Ras-related protein Rab-4B	7.35e-25	155	34.194	Q68EK7	rab4b	Ras-related protein Rab-4B	7.58e-25	159	33.962	O15971	Rab10	LD39986p	2.59e-25	168	32.738	Q94148
dd_Smed_v6_3891_0_1	NA	NA	NA	674	2.49608	4.56669	3.63e-08	2.19997	4.56669	1.35e-06	5.6415	4.5947	1.22783	darkblue	NA	NA	NA	NA	NA	10,17,19,30,39,41	Cathepsin+ cell,Intestine	NA	NA	NA	NA	NA	NA	NA	NA	NA	NA	NA	NA	NA	NA	NA	NA	NA	NA	NA	NA	NA	NA	NA	NA	NA	NA	NA	NA
dd_Smed_v6_390_0_1	NA	PSAP	Prosaposin	1088	1.84271	3.78836	3.88e-06	2.5358	3.78836	2.2e-10	3.58684	5.79896	0.618531	orange	Contig332	1.27978	6.82418	0.000337725	NA	17,28,30	Cathepsin+ cell,Intestine	4	NA	NA	P07602	PSAP	Prosaposin	3.74e-07	189	21.693	P50405	Sftpb	Pulmonary surfactant-associated protein B	0.000571	322	18.944	E7FCT1	psap	Prosaposin	7.76e-07	214	22.897	Q9Y125	Sap-r	BcDNA.GH08312	2.55e-06	246	21.138	NA
dd_Smed_v6_3900_1_1	NA	NA	NA	3421	1.04447	4.8514	0.000509648	0.855147	4.8514	0.00614023	2.06262	1.80894	1.14023	darkblue	PL030007A20H07	-0.00480171	6.88292	0.505807	NA	4,10,15,17,28,31,39,41	Cathepsin+ cell	NA	pgrn+ parenchymal cells,aqp+ parenchymal cells,pigment,ldlrr-1+ parenchymal cells	Cathepsin+ b	NA	NA	NA	NA	NA	NA	NA	NA	NA	NA	NA	NA	NA	NA	NA	NA	NA	NA	NA	NA	NA	NA	NA	NA	NA
dd_Smed_v6_3903_0_1	ada	ADA	Adenosine deaminase	1248	2.30415	5.04972	6.07e-13	2.15873	5.04972	1.7e-11	4.93877	4.46522	1.10605	darkblue	Contig7357	1.89274	8.35334	0.00068152	uniform	10,27,30,31	Cathepsin+ cell,Pharynx,Intestine	4	NA	NA	P00813	ADA	Adenosine deaminase	1.88e-77	339	38.348	P03958	Ada	Adenosine deaminase	7.4e-76	328	39.939	Q6DG22	ada	Adenosine deaminase	2.27e-83	341	39.589	Q9VHH7	Ada	Adenosine deaminase-like protein	5.58e-10	338	20.71	H2KYI5
dd_Smed_v6_3906_0_1	NA	OTC	Ornithine carbamoyltransferase, mitochondrial	1238	1.58608	5.22386	5.98e-06	1.68551	5.22386	1.64e-06	3.00233	3.21655	0.933401	dodgerblue	Contig4817	-0.691555	8.29408	0.00377558	NA	12,19,38	Parapharyngeal,Intestine	2,3,5	NA	NA	P00480	OTC	Ornithine carbamoyltransferase, mitochondrial	1.86e-138	336	55.655	P11725	Otc	Ornithine carbamoyltransferase, mitochondrial	2.12e-135	323	56.037	E9QHD9	otc	Ornithine carbamoyltransferase	2.44e-133	342	54.094	P05990	r	CAD protein	5.18e-20	316	26.899	Q18990
dd_Smed_v6_391_0_1	NA	NA	NA	407	3.35331	10.2229	1.73e-24	3.39363	10.2229	6.06e-25	10.2199	10.5095	0.972443	dodgerblue	Contig3732	3.09008	11.7935	2.29e-05	no_signal	19,30	Intestine	2,4,5	NA	Gut	NA	NA	NA	NA	NA	NA	NA	NA	NA	NA	NA	NA	NA	NA	NA	NA	NA	NA	NA	NA	NA	NA	NA	NA	NA
dd_Smed_v6_3910_0_1	NA	IDI1	Isopentenyl-diphosphate Delta-isomerase 1	854	1.06985	4.57191	0.00139051	0.956599	4.57191	0.0054484	2.09921	1.94073	1.08166	darkblue	NA	NA	NA	NA	NA	NA	NA	NA	NA	NA	Q13907	IDI1	Isopentenyl-diphosphate Delta-isomerase 1	9.27e-44	244	39.344	P58044	Idi1	Isopentenyl-diphosphate Delta-isomerase 1	4.29e-43	244	37.295	F1QVG2	idi1	Isopentenyl-diphosphate delta isomerase 1	6.03e-47	236	41.949	Q9VDC2	CG5919	CG5919 protein	2.57e-33	230	36.957	G5EFQ1
dd_Smed_v6_3912_0_1	NA	NA	NA	437	5.35038	3.32476	1.65e-07	5.26652	3.32476	2.8e-07	40.7966	38.4928	1.05985	darkblue	NA	NA	NA	NA	NA	30	Intestine	4	NA	NA	NA	NA	NA	NA	NA	NA	NA	NA	NA	NA	NA	NA	NA	NA	NA	NA	NA	NA	NA	NA	NA	NA	NA	NA	NA
dd_Smed_v6_3921_0_1	NA	MTOR	Serine/threonine-protein kinase mTOR	8795	1.05799	7.03642	0.00094424	1.05171	7.03642	0.00117287	2.08203	2.07298	1.00436	darkblue	NA	NA	NA	NA	NA	NA	NA	NA	NA	NA	P42345	MTOR	Serine/threonine-protein kinase mTOR	0	1592	33.543	Q9JLN9	Mtor	Serine/threonine-protein kinase mTOR	0	1592	33.606	F1Q9H9	mtor	Mechanistic target of rapamycin (serine/threonine kinase)	0	1597	33.688	Q9VK45	Tor	Target of rapamycin	0	1562	31.818	Q95Q95
dd_Smed_v6_3922_0_1	NA	ARHGAP44	Rho GTPase-activating protein 44	1962	0.926213	4.87601	0.00395491	1.12119	4.87601	0.000421621	1.90028	2.17527	0.873584	dodgerblue	PL05005B2G08	1.03597	7.96983	0.00192594	NA	10,15,17,28,41	Cathepsin+ cell	7	NA	Cathepsin+ b	Q17R89	ARHGAP44	Rho GTPase-activating protein 44	7.55e-31	408	26.225	Q5SSM3	Arhgap44	Rho GTPase-activating protein 44	5.83e-30	408	25.735	E7FAA4	fam13a	Family with sequence similarity 13, member A	9.08e-15	167	31.737	Q9VDS5	RhoGAP92B	Rho GTPase-activating protein 92B	2.16e-25	396	25.758	Q9XUS9
dd_Smed_v6_3925_0_1	NA	DTNBP1	Dysbindin	915	1.97732	2.71791	0.00983457	2.12643	2.71791	0.00596189	3.93761	4.36636	0.901806	dodgerblue	PL04018A1A03	1.63187	8.29807	0.000686946	NA	24	Epidermal	4	NA	NA	Q96EV8	DTNBP1	Dysbindin	2.89e-05	264	25	NA	NA	NA	NA	NA	NA	Q7ZWE6	dtnbp1a	Dysbindin-A	0.0001	220	25	Q9VVT5	Dysb	Dysbindin protein homolog	1.33e-05	205	23.415	NA
dd_Smed_v6_3928_0_1	NA	FMNL3	Formin-like protein 3	3528	0.814271	4.65468	0.0129211	1.08336	4.65468	0.000695703	1.75841	2.11897	0.829842	dodgerblue	NA	NA	NA	NA	NA	10,14,15,17,28,29,40	Cathepsin+ cell,Muscle,Protonephridia	NA	NA	NA	Q8IVF7	FMNL3	Formin-like protein 3	3.41e-138	1018	33.988	Q6ZPF4	Fmnl3	Formin-like protein 3	8.49e-136	1012	33.893	Q6NXC0	fmnl3	Formin-like protein 3	3.88e-65	465	34.194	Q9VUC6	CG32138	Formin-like protein CG32138	2.85e-52	386	33.42	P34489
dd_Smed_v6_3933_1_1	NA	NA	NA	522	1.99896	3.67261	9.82e-05	1.26354	3.67261	0.0202439	3.99713	2.40084	1.66489	green	Contig5292	0.740547	7.88361	0.000761111	NA	13,14	Muscle	NA	NA	NA	NA	NA	NA	NA	NA	NA	NA	NA	NA	NA	NA	NA	NA	NA	NA	NA	NA	NA	NA	NA	NA	NA	NA	NA	NA
dd_Smed_v6_3936_0_1	NA	NA	NA	1333	1.1405	5.23661	6.57e-05	0.932737	5.23661	0.00153575	2.20458	1.90889	1.1549	darkblue	NA	NA	NA	NA	NA	NA	NA	NA	NA	NA	NA	NA	NA	NA	NA	NA	NA	NA	NA	NA	NA	NA	NA	NA	NA	NA	NA	NA	NA	NA	NA	NA	NA	NA	NA
dd_Smed_v6_3945_0_1	NA	NA	NA	743	3.45895	4.13653	6.64e-16	3.35424	4.13653	4.57e-15	10.9963	10.2265	1.07528	darkblue	Contig1674	1.14404	7.04771	0.00019125	NA	NA	NA	NA	NA	NA	NA	NA	NA	NA	NA	NA	NA	NA	NA	NA	NA	NA	NA	NA	NA	NA	NA	NA	NA	NA	NA	NA	NA	NA	NA
dd_Smed_v6_3947_0_1	NA	MTRR	Methionine synthase reductase	2262	1.49351	6.14786	1.83e-07	1.54941	6.14786	7.01e-08	2.81573	2.92697	0.961994	dodgerblue	PL05004A2F08	0.542489	7.59215	0.0173063	NA	NA	NA	NA	NA	NA	Q9UBK8	MTRR	Methionine synthase reductase	2.58e-104	736	33.288	Q8C1A3	Mtrr	Methionine synthase reductase	7.63e-110	723	32.089	F8W4Z6	porb	NADPH--cytochrome P450 reductase	6.4e-55	668	25.898	Q27597	Cpr	NADPH--cytochrome P450 reductase	1.57e-48	664	24.548	Q09590
dd_Smed_v6_3948_0_1	NA	ACSS3	Acyl-CoA synthetase short-chain family member 3, mitochondrial	2212	1.64634	4.49388	1.34e-07	1.64892	4.49388	1.47e-07	3.13038	3.13599	0.998213	dodgerblue	Contig1873	0.117776	7.89513	0.440805	NA	10,17,19,28	Cathepsin+ cell,Intestine	5	NA	NA	Q9H6R3	ACSS3	Acyl-CoA synthetase short-chain family member 3, mitochondrial	4.42e-156	631	37.876	Q14DH7	Acss3	Acyl-CoA synthetase short-chain family member 3, mitochondrial	4.54e-155	631	37.559	F1QYS7	acss1	Acetyl-coenzyme A synthetase	1.43e-69	616	28.247	Q9VP61	AcCoAS	Acetyl-coenzyme A synthetase	7.93e-74	627	29.665	O45873
dd_Smed_v6_3949_0_1	NA	ZNF547	Trafficking protein particle complex 2, isoform CRA_a	579	0.966047	4.38126	0.00936254	1.07341	4.38126	0.00389591	1.95348	2.1044	0.928284	dodgerblue	Contig1877	0.586423	6.8274	0.0145315	NA	NA	NA	NA	NA	NA	Q6IBE5	ZNF547	Trafficking protein particle complex 2, isoform CRA_a	3.2e-56	139	56.835	Q9CQP2	Trappc2	Trafficking protein particle complex subunit 2	5.11e-56	139	56.115	Q08CN0	trappc2	Trafficking protein particle complex subunit 2	9.59e-56	139	54.676	Q9VUZ1	Trs20	Probable trafficking protein particle complex subunit 2	5.06e-48	135	52.593	O02173
dd_Smed_v6_3959_0_1	NA	PFKFB1	6-phosphofructo-2-kinase/fructose-2,6-bisphosphatase 1	1759	1.83692	4.24033	5.7e-08	1.66875	4.24033	1e-06	3.57246	3.17938	1.12363	darkblue	Contig4668	0.64985	7.53366	0.00142608	NA	17	Cathepsin+ cell	NA	NA	NA	P16118	PFKFB1	6-phosphofructo-2-kinase/fructose-2,6-bisphosphatase 1	0	481	57.173	Q6DTY7	Pfkfb4	6-phosphofructo-2-kinase/fructose-2,6-bisphosphatase 4	0	429	62.704	A2AR70	pfkfb1	6-phosphofructo-2-kinase/fructose-2,6-biphosphatase 1	0	430	62.558	Q0KHQ6	Pfrx	6-phosphofructo-2-kinase, isoform A	0	425	59.294	Q9N590
dd_Smed_v6_396_0_1	NA	PSAP	Prosaposin	880	5.38395	3.68351	1.76e-18	5.17055	3.68351	2.43e-17	41.7571	36.0156	1.15942	darkblue	Contig4121	2.77604	8.1274	0.000273669	NA	10,17,28,30,41	Cathepsin+ cell,Intestine	4	phagocytes	Gut	C9JIZ6	PSAP	Prosaposin	1.37e-11	177	21.469	Q61207	Psap	Prosaposin	2.83e-09	201	20.398	E7FCT1	psap	Prosaposin	2.57e-05	219	20.091	Q8IMH4	Sap-r	Saposin-related, isoform B	1.23e-06	194	21.134	NA
dd_Smed_v6_3969_0_1	NA	VPS33A	Vacuolar protein sorting-associated protein 33A	1964	1.31977	4.43504	1.27e-05	1.21039	4.43504	7.76e-05	2.49626	2.314	1.07876	darkblue	Contig4757	0.358463	6.73333	0.0199005	NA	17	Cathepsin+ cell	NA	NA	NA	Q96AX1	VPS33A	Vacuolar protein sorting-associated protein 33A	2.76e-82	592	28.378	Q9D2N9	Vps33a	Vacuolar protein sorting-associated protein 33A	2.05e-81	594	28.114	A0A0R4ID82	vps33a	Vacuolar protein sorting 33A	1.98e-83	602	29.07	Q9Y1I2	car	Vacuolar protein sorting-associated protein 33A	6.75e-62	516	27.907	P34260
dd_Smed_v6_3972_0_1	NA	USP3	Ubiquitin carboxyl-terminal hydrolase 3	1614	3.90683	6.4918	3.78e-27	3.86138	6.4918	1.32e-26	14.9993	14.5342	1.03201	darkblue	NA	NA	NA	NA	NA	30	Intestine	4,5	NA	NA	H0YLB7	USP3	Ubiquitin carboxyl-terminal hydrolase 3	8.98e-06	124	28.226	Q91W36	Usp3	Ubiquitin carboxyl-terminal hydrolase 3	2.39e-05	122	28.689	NA	NA	NA	NA	NA	NA	Q8MSP3	Usp20-33	AT06247p	3.5e-05	132	25.758	Q9GRV2
dd_Smed_v6_398_0_1	NA	ALDOC	Fructose-bisphosphate aldolase C	1606	1.52732	9.04468	6.57e-06	1.72414	9.04468	3.85e-07	2.8825	3.30383	0.87247	dodgerblue	Contig1821	-0.359644	9.92307	0.0243505	NA	6,10,19,22,28,29,31	Intestine,Cathepsin+ cell,Neoblast,Protonephridia	2,5,7	phagocytes,pigment,goblet cells	NA	P09972	ALDOC	Fructose-bisphosphate aldolase C	3.6e-158	364	62.912	P05063	Aldoc	Fructose-bisphosphate aldolase C	2.37e-158	363	63.361	Q803Q7	aldoaa	Fructose-bisphosphate aldolase	1.76e-160	364	64.286	P07764	Ald	Fructose-bisphosphate aldolase	3.43e-163	362	65.746	P46563
dd_Smed_v6_3982_0_1	NA	ABCC1	Multidrug resistance-associated protein 1	4857	5.95201	5.20279	3.79e-16	6.20766	5.20279	4.6e-17	61.9063	73.9078	0.837615	dodgerblue	Contig6219	2.06235	7.73946	0.000975457	NA	30	Intestine	4	NA	NA	P33527	ABCC1	Multidrug resistance-associated protein 1	0	1571	45.64	O35379	Abcc1	Multidrug resistance-associated protein 1	0	1575	45.397	F1RCV0	abcc2	ATP-binding cassette, sub-family C (CFTR/MRP), member 2	0	1565	43.514	Q7KTB7	MRP	Multidrug-Resistance like protein 1, isoform M	0	1341	49.888	Q20943
dd_Smed_v6_3983_0_1	NA	MSRA	Mitochondrial peptide methionine sulfoxide reductase	1068	1.88527	4.39344	6.08e-07	1.91064	4.39344	4.95e-07	3.69421	3.75977	0.982565	dodgerblue	Contig2001	0.458294	6.78094	0.0115529	NA	NA	NA	NA	NA	NA	Q9UJ68	MSRA	Mitochondrial peptide methionine sulfoxide reductase	8.05e-79	231	51.948	Q9D6Y7	Msra	Mitochondrial peptide methionine sulfoxide reductase	8.23e-81	230	52.174	NA	NA	NA	NA	NA	NA	P08761	Eip71CD	Peptide methionine sulfoxide reductase	4.31e-23	170	37.059	O02089
dd_Smed_v6_3990_0_1	NA	RHOT1	Mitochondrial Rho GTPase 1	2051	0.706535	4.42503	0.0734686	1.22526	4.42503	0.000955862	1.63188	2.33797	0.69799	dodgerblue	NA	NA	NA	NA	NA	NA	NA	NA	NA	NA	Q8IXI2	RHOT1	Mitochondrial Rho GTPase 1	0	619	47.496	Q8BG51	Rhot1	Mitochondrial Rho GTPase 1	0	619	48.142	Q6NVC5	rhot1a	Mitochondrial Rho GTPase 1-A	0	619	47.173	Q8IMX7	Miro	Mitochondrial Rho GTPase	6.9e-178	642	43.146	Q94263
dd_Smed_v6_3998_0_1	NA	HACD3	Very-long-chain (3R)-3-hydroxyacyl-CoA dehydratase 3	1602	1.40759	4.78411	0.00294644	1.48505	4.78411	0.00186647	2.65293	2.79926	0.947724	dodgerblue	Contig1151	-0.291034	7.8029	0.502984	NA	NA	NA	NA	NA	NA	Q9P035	HACD3	Very-long-chain (3R)-3-hydroxyacyl-CoA dehydratase 3	1.99e-50	366	29.508	Q8K2C9	Hacd3	Very-long-chain (3R)-3-hydroxyacyl-CoA dehydratase 3	1.06e-49	366	28.689	Q7SY06	hacd3	Very-long-chain (3R)-3-hydroxyacyl-CoA dehydratase	2.27e-58	358	31.564	Q9VJX8	CG9267-RA	Very-long-chain (3R)-3-hydroxyacyl-CoA dehydratase	3.58e-75	365	34.247	O17040
dd_Smed_v6_3999_0_1	NA	INPP4B	Type II inositol 3,4-bisphosphate 4-phosphatase	3053	2.14049	4.49063	7.55e-13	1.77352	4.49063	3.49e-09	4.4091	3.41888	1.28963	darkblue	Contig3086	0.890505	6.81717	0.00623755	NA	10,30,31,39	Cathepsin+ cell,Intestine	4	NA	NA	O15327	INPP4B	Type II inositol 3,4-bisphosphate 4-phosphatase	3.26e-49	327	33.028	Q1A6V1	Inpp4b	Inositol polyphosphate 4-phosphatase type II alpha isoform	2.53e-49	327	32.416	B8A553	inpp4b	Inositol polyphosphate-4-phosphatase type II B	4.26e-49	311	36.977	Q9VY47	CG42271	Uncharacterized protein, isoform C	2.65e-36	323	32.508	Q21623
dd_Smed_v6_400_0_1	NA	ALDH2	Aldehyde dehydrogenase, mitochondrial	1752	2.6129	9.4211	1.34e-16	2.42213	9.4211	1.62e-14	6.11731	5.35963	1.14137	darkblue	Contig1973	0.0174598	9.84419	0.0176045	NA	4,6,10,19,22,26,28,31,43	Cathepsin+ cell,Intestine,Neoblast,Protonephridia	5,7	phagocytes,pigment,goblet cells,gut progenitors	NA	P05091	ALDH2	Aldehyde dehydrogenase, mitochondrial	0	487	60.575	P47738	Aldh2	Aldehyde dehydrogenase, mitochondrial	0	487	61.191	Q8QGQ2	aldh2.1	Aldehyde dehydrogenase 2	0	487	60.37	Q9VB96	CG31075	Uncharacterized protein, isoform A	0	478	55.649	Q20780
dd_Smed_v6_4001_0_1	NA	RAB18	Ras-related protein Rab-18	979	1.13719	4.8116	8.42e-05	0.821906	4.8116	0.00685192	2.19952	1.76774	1.24426	darkblue	Contig2069	0.59393	7.53512	0.0571404	NA	NA	NA	NA	NA	NA	Q9NP72	RAB18	Ras-related protein Rab-18	9.77e-104	185	76.216	P35293	Rab18	Ras-related protein Rab-18	4.34e-104	198	71.717	Q6DHC1	rab18b	Ras-related protein Rab-18-B	1.63e-104	201	72.637	Q9W4A0	Rab18	GH11193p	1.58e-57	196	47.449	Q8MXS1
dd_Smed_v6_4003_0_1	NA	NUCB1	Nucleobindin-1	1478	2.47216	4.67572	3.63e-16	1.94944	4.67572	1.31e-10	5.54874	3.86224	1.43666	darkblue	Contig2769	0.724942	7.41808	0.00324731	NA	19	Intestine	NA	NA	NA	Q02818	NUCB1	Nucleobindin-1	6.8e-38	300	38.667	Q02819	Nucb1	Nucleobindin-1	1.68e-39	300	39.333	A0A0R4IJA4	nucb1	Nucleobindin 1	3.36e-42	306	37.582	Q7KQC2	NUCB1	Calcium binding EF-hand protein	2.04e-36	366	29.508	NA
dd_Smed_v6_4004_0_1	NA	PGGT1B	Geranylgeranyl transferase type-1 subunit beta	1265	1.81877	4.47792	8.54e-09	1.66273	4.47792	1.77e-07	3.52779	3.16615	1.11422	darkblue	NA	NA	NA	NA	NA	26,29	Protonephridia	NA	NA	NA	P53609	PGGT1B	Geranylgeranyl transferase type-1 subunit beta	1.23e-74	324	40.741	Q8BUY9	Pggt1b	Geranylgeranyl transferase type-1 subunit beta	1.57e-74	324	41.049	Q4V8Z9	pggt1b	Protein geranylgeranyltransferase type I, beta subunit	1.01e-69	313	39.936	Q24172	betaggt-I	Geranylgeranyl transferase beta-subunit type I	7.21e-66	356	36.517	O18197
dd_Smed_v6_4008_0_1	NA	PCYT1B	Choline-phosphate cytidylyltransferase B	1150	1.02556	3.83397	0.00837631	0.66878	3.83397	0.118436	2.03575	1.58973	1.28056	darkblue	Contig1692	0.735031	6.87958	0.000824224	NA	21	Neural	NA	NA	NA	Q9Y5K3	PCYT1B	Choline-phosphate cytidylyltransferase B	2.27e-89	289	47.405	Q811Q9	Pcyt1b	Choline-phosphate cytidylyltransferase B	7.62e-89	289	47.059	Q32LS9	pcyt1bb	Zgc:123291	2.88e-88	233	54.077	Q9W0D9	Pcyt2	CTP:phosphocholine cytidylyltransferase 2	3.79e-101	295	50.169	P49583
dd_Smed_v6_4014_0_1	NA	DDHD2	Phospholipase DDHD2	3930	1.27002	5.02674	1.58e-05	1.11281	5.02674	0.000201748	2.41165	2.16267	1.11513	darkblue	PL030003B20G11	0.00746375	6.17677	0.435191	NA	NA	NA	NA	NA	NA	O94830	DDHD2	Phospholipase DDHD2	1.63e-81	389	39.846	Q80Y98	Ddhd2	Phospholipase DDHD2	6.58e-81	354	41.525	A8E7C9	sec23ip	SEC23-interacting protein	1.15e-83	365	40.822	M9MRD9	PAPLA1	Phosphatidic acid phospholipase A1, isoform B	9.82e-139	648	37.191	Q21478
dd_Smed_v6_402_1_1	NA	NA	NA	1095	1.80241	7.65165	1.67e-08	2.00266	7.65165	4.17e-10	3.48802	4.00738	0.870399	dodgerblue	Contig370	1.25845	10.1277	0.00111226	NA	12,29	Parapharyngeal,Protonephridia	NA	NA	NA	NA	NA	NA	NA	NA	NA	NA	NA	NA	NA	NA	NA	NA	NA	NA	NA	NA	NA	NA	NA	NA	NA	NA	NA	NA
dd_Smed_v6_4043_0_1	NA	EXOC8	Exocyst complex component 8	2237	1.07322	4.06606	0.00165605	1.21129	4.06606	0.000372562	2.10413	2.31544	0.908737	dodgerblue	Contig3995	0.890102	8.09	0.00100689	NA	NA	NA	NA	NA	NA	Q8IYI6	EXOC8	Exocyst complex component 8	4.01e-37	691	26.194	Q6PGF7	Exoc8	Exocyst complex component 8	1.83e-35	691	25.615	F1QE13	exoc8	Exocyst complex component 8	9.2e-51	653	27.412	Q9VBI4	Exo84	Exo84 ortholog, isoform A	6.94e-19	561	23.173	Q95Q35
[truncated: 908 more rows]
[truncated: 16 more columns]

## Sheet: S1B. Figure Locations
Figure	Panel	geneID	Name in Figure	uniprot Human best hit	All 5 best hit
1	F	dd_Smed_v6_1412_0_1	cpa2	CPA2	CPA2
1	F	dd_Smed_v6_279_0_1	rpz4	NA	rpz4
1	F	dd_Smed_v6_4693_0_1	lipf	LIPF	LIPF
1	F	dd_Smed_v6_1067_0_1	atp6ap2	ATP6AP2	atp6ap2
1	F	dd_Smed_v6_2351_0_1	cyp2b19	CYP2B6	Cyp2b19
1	F	dd_Smed_v6_4449_0_1	cyp2a6	CYP2A6	CYP2A6
[truncated: 300 more rows]

## Sheet: LEGEND
Supplementary File 1. RNA-Seq and Other Data for 1,844 Intestine-Enriched Transcripts.
[truncated: 27 more rows]
