# Supplementary material for: Cell-type diversity and regionalized gene expression in the planarian intestine
Source: eLife. 2020 Apr 2;9:e52613. doi: 10.7554/eLife.52613 (PMC7117911; doi:10.7554/eLife.52613)
Supplement: Supplementary file 2. — Summary of RNA-Seq data, together with phagocyte expression, single-cell RNA-Seq data, best BLAST hits for human/mouse/zebrafish/fly/C. elegans, and transcript sequences. Single-cell data from Plass et al. (2018) reprinted with permission from AAAS. [file elife-52613-supp2.xlsx]

## Sheet: All Transcripts
geneID	length	logFC_medial	logCPM_medial	LR_medial	PValue_medial	FDR_medial	logFC_lateral	logCPM_lateral	LR_lateral	PValue_lateral	FDR_lateral	M1_cpm	M2_cpm	M3_cpm	M4_cpm	L1_cpm	L2_cpm	L3_cpm	L4_cpm	NG1_cpm	NG2_cpm	NG3_cpm	NG4_cpm	M1_rpkm	M2_rpkm	M3_rpkm	M4_rpkm	L1_rpkm	L2_rpkm	L3_rpkm	L4_rpkm	NG1_rpkm	NG2_rpkm	NG3_rpkm	NG4_rpkm	M1_tpm	M2_tpm	M3_tpm	M4_tpm	L1_tpm	L2_tpm	L3_tpm	L4_tpm	NG1_tpm	NG2_tpm	NG3_tpm	NG4_tpm	phagocyte_EST_ID	phagocyte_log2FC
dd_Smed_v6_1_0_1	416	6.49054	16.7728	152.64	4.59e-35	3.05e-33	6.35771	16.7728	148.26	4.16e-34	2.96e-32	153330	127360	227841	190145	152734	116823	177644	190023	1046.45	1652.38	3147.81	1923.5	294319	282456	418805	406300	291618	276537	347008	413298	3757.69	5117.72	11318.8	5577.16	277683	233588	366369	326407	282311	233799	313023	338316	4285.9	6021.52	11929.3	6641.48	Contig4465	4.83036
dd_Smed_v6_10_0_1	704	0.962993	11.6844	4.75333	0.0292417	0.0709491	1.01742	11.6844	5.2949	0.021388	0.0613835	5179.65	4426.5	2273.55	3599.1	2154.73	6018.06	5805.85	2095.31	1647.31	2782.66	2560.09	950.427	5875.04	5800.96	2469.47	4544.4	2431.04	8417.88	6701.56	2692.94	3495.4	5092.69	5439.6	1628.39	5542.97	4797.32	2160.28	3650.81	2353.45	7116.93	6045.22	2204.38	3986.75	5992.07	5733.01	1939.15	Contig5595	1.8625
dd_Smed_v6_10_1_1	730	4.57657	13.7949	136.701	1.4e-31	7.67e-30	4.82941	13.7949	148.577	3.55e-34	2.55e-32	18993.4	15038.4	22266.8	20061.4	23882.3	16572.2	21891.8	28640.2	615.629	772.323	852.961	959.291	20776	19006.1	23324.2	24428.3	25985.2	22355.1	24369.2	35498.1	1259.77	1363.13	1747.8	1585.04	19601.7	15717.8	20403.9	19624.8	25155.8	18900.2	21982.6	29057.9	1436.85	1603.86	1842.07	1887.53	Contig4399	-0.119826
dd_Smed_v6_100_0_1	733	6.84412	8.57273	185.154	3.63e-42	3.34e-40	7.16661	8.57273	197.302	8.1e-45	9.34e-43	834.745	350.3	407.581	429.45	478.55	775.045	939.274	335.761	2.65572	6.41532	5.27867	3.20191	909.354	440.908	425.189	520.791	518.555	1041.22	1041.29	414.455	5.41218	11.2765	10.7722	5.26887	857.955	364.626	371.954	418.385	502.004	880.301	939.306	339.263	6.17297	13.268	11.3533	6.27437	Contig60	4.0523
dd_Smed_v6_1000_0_1	1387	0.0590792	6.57108	0.0450537	0.831905	0.894777	-0.057773	6.57108	0.0430987	0.83554	0.910993	83.7171	95.0821	119.94	96.8524	111.821	81.094	84.0666	87.7898	83.1572	87.258	69.698	139.569	48.1971	63.2462	66.1241	62.0711	64.0354	57.5747	49.2527	57.2689	89.5608	81.0567	75.1672	121.374	45.4729	52.3038	57.8451	49.8657	61.9915	48.6767	44.4289	46.879	102.15	95.3715	79.2217	144.537	Contig6143	-0.0885418
dd_Smed_v6_10001_0_1	930	0.598991	3.43844	2.68011	0.101609	0.197621	0.699673	3.43844	3.66069	0.0557105	0.134946	9.91666	7.22815	15.2455	14.9004	13.6924	15.0348	8.06625	13.9215	8.96305	7.71768	6.94047	7.58346	8.51463	7.17062	12.5352	14.2419	11.6942	15.9197	7.04809	13.5442	14.3968	10.6921	11.1632	9.83553	8.03336	5.93001	10.9658	11.4415	11.3209	13.4593	6.35781	11.087	16.4206	12.5804	11.7654	11.7125	Contig3142	0.373352
dd_Smed_v6_10002_0_1	904	3.03691	1.46492	15.9238	6.59e-05	0.000308495	3.42874	1.46492	19.7491	8.83e-06	5.73e-05	4.93705	1.96648	2.40386	3.94682	1.41488	6.9536	3.70012	5.35767	0.265572	0.410002	0.586519	0.337043	4.36096	2.00694	2.03336	3.88092	1.24315	7.57461	3.32606	5.36239	0.438842	0.584356	0.970505	0.449707	4.11447	1.65971	1.77877	3.11779	1.20347	6.40398	3.00031	4.38953	0.50053	0.687554	1.02285	0.535528	Contig1198	1.33243
dd_Smed_v6_10003_0_1	1649	-0.10248	3.05887	0.0674052	0.795153	0.872884	0.165476	3.05887	0.176887	0.674062	0.80959	9.61874	3.87982	10.1215	6.6076	7.48518	9.81962	9.5463	9.53412	7.00446	7.98297	8.89554	8.56089	4.6578	2.17071	4.69351	3.56187	3.6054	5.86398	4.70432	5.23131	6.34524	6.23741	8.0693	6.26197	4.39453	1.79515	4.10586	2.86148	3.49033	4.95772	4.24359	4.28223	7.23719	7.33895	8.50456	7.45699	NA	NA
dd_Smed_v6_10004_0_1	1560	-1.38252	2.97746	10.5005	0.00119341	0.00433296	-0.645489	2.97746	2.38691	0.122355	0.251088	3.40486	3.93297	5.25054	5.14418	9.44776	3.94664	10.7673	5.35767	11.4528	10.0089	11.9259	12.8413	1.74284	2.32599	2.57366	2.93121	4.81035	2.49128	5.60875	3.10744	10.9668	8.26648	11.4354	9.92884	1.64433	1.92356	2.25143	2.35483	4.65681	2.10626	5.05944	2.54367	12.5084	9.72635	12.0522	11.8236	NA	NA
dd_Smed_v6_10006_0_1	959	-0.148015	0.847299	0.0208368	0.885224	0.930041	-0.991038	0.847299	0.91387	0.33909	0.530248	0.425608	4.46445	2.21408	0.665195	1.82565	1.4565	1.03603	0	1.99179	1.51942	3.06293	2.02226	0.354384	4.29498	1.76542	0.616575	1.51207	1.49558	0.877884	0	3.10255	2.04136	4.77753	2.54349	0.334354	3.5519	1.54438	0.495334	1.46381	1.26444	0.791906	0	3.53868	2.40186	5.03523	3.02889	Contig5362	0.0501796
dd_Smed_v6_10007_0_1	2124	0.13787	3.27127	0.130739	0.717667	0.819122	-0.0144958	3.27127	0.00144656	0.969661	0.985119	12.3852	7.75963	9.93174	10.8205	13.875	10.1955	5.77218	7.00294	7.63519	9.16474	9.87307	10.5157	4.6562	3.37054	3.57555	4.52844	5.18859	4.72685	2.20835	2.98316	5.36982	5.55937	6.95315	5.9717	4.39302	2.78739	3.12788	3.63798	5.02298	3.99634	1.99207	2.44195	6.12465	6.54117	7.32821	7.11132	NA	NA
dd_Smed_v6_1001_0_1	2118	-0.145174	6.68859	0.281874	0.595475	0.727711	-0.172774	6.68859	0.399386	0.527406	0.701932	92.1015	115.597	104.568	88.4266	114.742	77.2884	88.3587	112.68	114.096	105.177	76.8991	146.917	34.7235	50.354	37.7524	37.1118	43.0299	35.9341	33.9005	48.1361	80.4711	63.9819	54.31	83.668	32.7609	41.6421	33.0257	29.8143	41.6564	30.3806	30.5803	39.4031	91.7829	75.2812	57.2395	99.6348	Contig5437	-0.400295
dd_Smed_v6_10010_0_1	1143	0.372236	4.76851	1.77107	0.183249	0.313759	0.20927	4.76851	0.561217	0.45377	0.636904	26.1323	28.0622	33.2745	34.9006	25.4222	18.4646	27.8249	37.5459	22.2748	21.7542	26.0349	24.4693	18.2564	22.651	22.2606	27.142	17.6661	15.9079	19.782	29.7212	29.1114	24.5221	34.0717	25.8219	17.2245	18.7321	19.4735	21.8049	17.1022	13.4494	17.8446	24.3291	33.2036	28.8527	35.9096	30.7497	Contig6016	0.448799
dd_Smed_v6_10011_0_1	4354	-0.877872	1.46481	0.606971	0.43593	0.590775	-0.393018	1.46481	0.123728	0.725026	0.844594	1.78755	0	5.81987	0	4.15336	1.83237	3.3671	1.26559	4.21595	3.35237	2.57417	3.80858	0.327834	0	1.02211	0	0.757676	0.414422	0.628421	0.263	1.44644	0.992026	0.884367	1.05509	0.309304	0	0.894138	0	0.733493	0.350375	0.566875	0.215286	1.64977	1.16722	0.93207	1.25644	NA	NA
dd_Smed_v6_10013_0_1	1815	-0.160231	2.28552	0.10071	0.750979	0.84291	-0.728191	2.28552	2.05174	0.152032	0.295866	4.85193	3.34834	5.75661	6.65195	3.83387	2.25522	2.36807	5.44204	6.07495	4.70296	5.99553	6.26899	2.13462	1.70202	2.42529	3.25782	1.67777	1.22358	1.06023	2.71291	4.9999	3.33853	4.94123	4.16615	2.01397	1.40755	2.12163	2.61722	1.62422	1.03448	0.956395	2.22073	5.70273	3.92812	5.20776	4.9612	NA	NA
dd_Smed_v6_10014_0_1	679	-2.13331	2.49773	13.5052	0.000237906	0.000995263	-1.22469	2.49773	4.75975	0.0291327	0.0795608	2.51109	2.76371	2.53038	1.37474	7.75903	2.06729	5.92018	1.47652	7.07085	11.3353	9.61239	12.2684	2.95308	3.75521	2.84963	1.79972	9.07632	2.99813	7.08513	1.96753	15.5559	21.5092	21.1761	21.7936	2.78616	3.10551	2.49284	1.44583	8.78662	2.53478	6.39123	1.61057	17.7426	25.3078	22.3184	25.9527	NA	NA
dd_Smed_v6_10016_0_1	3692	-1.46779	1.32113	3.16345	0.0753039	0.155387	-1.22659	1.32113	2.24667	0.133903	0.268303	1.87267	1.16926	0.379557	2.3947	2.28207	0.422854	3.51511	0.674982	4.41513	4.10002	2.21574	5.46009	0.405027	0.292187	0.0786118	0.576561	0.490952	0.112784	0.773677	0.165417	1.78639	1.43082	0.89772	1.78382	0.382134	0.241635	0.0687693	0.463188	0.475282	0.0953537	0.697904	0.135407	2.0375	1.6835	0.946144	2.12424	NA	NA
dd_Smed_v6_10017_0_1	511	-0.648777	1.81799	1.21825	0.269705	0.418825	-0.284083	1.81799	0.237247	0.626201	0.77683	2.3834	2.39167	2.3406	3.59205	3.33182	1.36253	5.25416	3.83896	3.95038	3.37648	5.27867	4.21303	3.72443	4.31809	3.50251	6.24852	5.17884	2.62569	8.35536	6.79741	11.5482	8.51342	15.4521	9.9446	3.51392	3.57101	3.06398	5.01984	5.01354	2.2199	7.53705	5.5642	13.1715	10.0169	16.2856	11.8424	Contig1989	-0.124947
dd_Smed_v6_10018_0_1	3380	-0.909359	1.99747	1.88056	0.17027	0.296169	0.0758328	1.99747	0.0134679	0.907612	0.952267	2.51109	0.425185	5.06076	1.68516	7.07441	5.59107	3.51511	2.95305	5.41102	4.14825	5.14833	3.43784	0.593237	0.116058	1.14491	0.44318	1.66244	1.62891	0.845094	0.790505	2.39143	1.58128	2.27842	1.22682	0.559706	0.0959783	1.00156	0.356035	1.60938	1.37717	0.762326	0.647088	2.72759	1.86054	2.40132	1.46094	NA	NA
dd_Smed_v6_10019_0_1	807	0.484997	1.46823	0.282459	0.595094	0.727448	-0.177806	1.46823	0.0380302	0.845382	0.917385	2.89413	8.23797	0.948892	1.68516	3.1949	1.78538	3.66311	0.0421864	1.65982	2.79766	3.5517	1.82003	2.8637	9.418	0.899116	1.85619	3.14453	2.1786	3.68858	0.0472987	3.07244	4.46664	6.58335	2.72031	2.70184	7.78857	0.786543	1.4912	3.04416	1.8419	3.32733	0.0387176	3.50433	5.25546	6.93846	3.23944	NA	NA
dd_Smed_v6_1002_0_1	1430	2.67655	7.89183	95.8985	1.21e-22	4.02e-21	2.58944	7.89183	90.3945	1.95e-21	6.82e-20	355.553	297.736	373.421	331.533	258.102	309.153	403.017	308.34	45.0808	57.0144	58.5541	51.7698	198.541	192.091	199.68	206.085	143.36	212.891	229.018	195.094	47.0923	51.3699	61.25	43.667	187.319	158.857	174.679	165.561	138.784	179.989	206.588	159.7	53.7121	60.4419	64.5538	52.0002	Contig3716	0.389085
dd_Smed_v6_10021_0_1	748	0.170137	1.94944	0.04489	0.832206	0.894881	0.670701	1.94944	0.69541	0.40433	0.59391	4.76681	0.58463	6.32595	2.08428	3.51439	7.56439	7.03022	1.34996	3.02088	3.08707	5.66968	0.438156	5.08873	0.721094	6.46691	2.4769	3.73181	9.95844	7.63748	1.63294	6.0329	5.31747	11.3381	0.706545	4.8011	0.596336	5.65722	1.98986	3.6127	8.4194	6.88947	1.33669	6.88094	6.25655	11.9497	0.84138	Contig5435	0.136911
dd_Smed_v6_10022_0_1	1329	0.418642	4.26369	2.00043	0.157254	0.278245	0.521927	4.26369	3.11233	0.0777019	0.176927	20.6845	16.9543	18.8513	24.834	22.775	23.304	14.4304	26.9149	13.9757	17.8954	14.1416	14.8299	12.4281	11.7697	10.8465	16.6102	13.6115	17.2673	8.82343	18.3239	15.7088	17.3491	15.9169	13.4594	11.7256	9.73342	9.48847	13.3441	13.1771	14.5987	7.95928	14.9995	17.917	20.4129	16.7755	16.0279	NA	NA
dd_Smed_v6_10024_0_1	4057	-0.615528	1.31496	0.420649	0.516614	0.662395	-0.689709	1.31496	0.527919	0.467483	0.64962	4.17096	3.02945	1.07541	0	2.19079	1.78538	2.96009	0.9281	1.62663	4.67884	2.31349	4.07822	0.820945	0.688922	0.202695	0	0.428911	0.433357	0.592902	0.206986	0.598932	1.48591	0.852996	1.21249	0.774543	0.569731	0.177316	0	0.415221	0.366383	0.534834	0.169434	0.683124	1.74833	0.899007	1.44388	NA	NA
dd_Smed_v6_10025_0_1	620	3.36614	3.88147	85.6569	2.14e-20	6.18e-19	3.40522	3.88147	87.4995	8.43e-21	2.84e-19	16.7264	20.8872	19.1044	26.1643	15.8832	24.2906	26.4188	18.562	1.22827	2.33942	2.21574	2.22448	21.5424	31.0815	23.5621	37.5123	20.3478	38.5803	34.6262	27.0884	2.95935	4.86157	5.34578	4.32763	20.3248	25.704	20.612	30.136	19.6984	32.6179	31.2349	22.174	3.37535	5.72014	5.63413	5.1535	Contig6864	1.03401
dd_Smed_v6_10026_0_1	525	0.141789	2.07801	0.0285107	0.865914	0.917754	-0.516314	2.07801	0.375656	0.539937	0.712325	5.66058	8.87575	5.06076	0	3.78823	1.78538	2.73809	4.09208	3.45243	5.06473	4.00788	5.22416	8.60964	15.5976	7.37104	0	5.73125	3.34882	4.23809	7.05238	9.82337	12.4296	11.4193	12.0025	8.12301	12.899	6.44816	0	5.54832	2.83127	3.82302	5.77291	11.2042	14.6247	12.0353	14.293	PL08007A1G08	-0.210665
dd_Smed_v6_10027_0_1	1334	0.193826	2.34875	0.0805623	0.776537	0.861173	-0.0872196	2.34875	0.0163242	0.898334	0.947376	5.87339	11.3737	4.55468	0.532156	8.76314	2.72506	4.47714	2.40462	5.97536	3.88296	4.33372	5.32528	3.51573	7.86608	2.61081	0.3546	5.21766	2.01159	2.72727	1.63096	6.69119	3.75031	4.85948	4.81504	3.31702	6.50516	2.28392	0.284873	5.05113	1.7007	2.46016	1.33506	7.63176	4.41262	5.1216	5.73392	PL05002A2H12	-0.015058
dd_Smed_v6_10028_0_1	932	0.31093	2.70726	0.451066	0.501829	0.649717	0.524598	2.70726	1.28755	0.256499	0.437957	5.91595	9.03519	7.78091	3.41467	5.15747	6.81265	12.1734	6.11702	5.70979	4.46178	5.05058	5.83084	5.06864	8.94404	6.38392	3.25678	4.39535	7.19812	10.614	5.93848	9.15164	6.16812	8.10606	7.5462	4.78215	7.39661	5.58463	2.61638	4.25506	6.08568	9.57445	4.8611	10.4381	7.25742	8.5433	8.98629	NA	NA
dd_Smed_v6_10029_0_1	4194	-2.35781	2.90459	9.8549	0.0016938	0.00594754	-1.81567	2.90459	6.1014	0.0135075	0.0414469	2.97925	3.93297	4.80772	0	4.01644	5.87298	5.32817	1.81401	12.1831	19.5354	12.7405	15.5377	0.567234	0.865175	0.876564	0	0.76065	1.37895	1.03236	0.391348	4.33935	6.00141	4.54404	4.46859	0.535173	0.715489	0.766814	0	0.736372	1.16584	0.931254	0.320348	4.94932	7.06127	4.78915	5.32136	NA	NA
dd_Smed_v6_1003_0_1	1069	0.613142	5.08241	0.485815	0.4858	0.634846	-1.27486	5.08241	2.04829	0.152377	0.29645	23.6212	124.154	11.1969	51.8852	0.775903	42.2854	1.59105	12.3184	7.43601	53.1314	9.09104	68.1837	17.6444	107.151	8.00929	43.1441	0.576503	38.9522	1.20945	10.4263	10.391	64.0374	12.721	76.9337	16.6471	88.6125	7.00649	34.6604	0.558103	32.9323	1.091	8.53468	11.8516	75.3465	13.4071	91.6154	Contig4317	-1.83522
dd_Smed_v6_10030_0_1	1124	-0.360993	2.34852	0.185885	0.666364	0.782108	-0.0354323	2.34852	0.00180101	0.966149	0.983386	2.59621	10.6296	3.79557	0	7.57647	2.81903	6.4012	4.51394	5.34463	4.4859	7.36407	4.65119	1.84441	8.72497	2.58216	0	5.35393	2.46974	4.62783	3.63363	7.10307	5.14214	9.80022	4.99127	1.74016	7.21545	2.25886	0	5.18304	2.08805	4.17459	2.9744	8.10154	6.05025	10.3289	5.94378	Contig4057	-0.0282302
dd_Smed_v6_10031_0_1	1203	-2.4573	-0.419775	2.8668	0.0904247	0.179863	-0.879873	-0.419775	0.410382	0.521776	0.696974	0.340486	0.478334	0	0	1.41488	0.563806	0.518016	0	1.69302	1.18177	0.619103	1.11224	0.226005	0.366841	0	0	0.934172	0.461512	0.349913	0	2.10228	1.26569	0.769807	1.11518	0.21323	0.303373	0	0	0.904355	0.390187	0.315643	0	2.3978	1.48921	0.811331	1.328	Contig4285	-0.345134
dd_Smed_v6_10032_0_1	3098	-5.00757	2.52865	17.0614	3.62e-05	0.000178387	-4.23172	2.52865	13.2352	0.000274737	0.00130806	0.893776	0.0531482	0.948892	0.0443463	1.68873	0	1.62805	0	14.7724	13.7954	9.84048	24.3682	0.230373	0.0158277	0.234211	0.0127242	0.432963	0	0.427041	0	7.12304	5.73735	4.75138	9.48757	0.217351	0.0130894	0.204887	0.0102222	0.419144	0	0.385217	0	8.12432	6.75058	5.00767	11.2981	NA	NA
dd_Smed_v6_10033_0_1	1517	-0.758545	1.3322	0.694199	0.40474	0.562193	-0.978362	1.3322	1.14904	0.283751	0.469381	1.83011	0	4.55468	1.86255	1.3236	1.55047	2.96009	1.2234	3.48563	2.05001	4.52923	3.87599	0.963331	0	2.29586	1.09138	0.693016	1.00646	1.58563	0.729685	3.43234	1.74113	4.46604	3.08184	0.908882	0	2.00841	0.876777	0.670896	0.850913	1.43034	0.597303	3.91482	2.04861	4.70695	3.66997	PL06017A2B11	0.0775898
dd_Smed_v6_10034_0_1	2549	-0.183482	3.5862	0.257604	0.611771	0.741349	0.132106	3.5862	0.13446	0.713852	0.837171	10.5551	13.978	12.2723	5.58764	10.5888	13.1555	12.5064	16.4527	14.6396	12.5171	12.7079	8.22384	3.30655	5.05925	3.68154	1.94856	3.2995	5.08224	3.98699	5.84007	8.57937	6.32695	7.45742	3.89151	3.11965	4.18394	3.2206	1.5654	3.19419	4.2968	3.59651	4.78054	9.78536	7.4443	7.85968	4.63415	NA	NA
dd_Smed_v6_10035_0_1	1485	1.71869	2.34424	9.87372	0.00167656	0.00589646	2.08734	2.34424	14.3105	0.000155002	0.000778328	7.83118	6.48408	4.93424	3.90248	9.72161	7.89328	8.58427	3.7124	0.929501	2.09824	2.63933	1.34817	4.21099	4.02841	2.54078	2.33598	5.19977	5.23419	4.69742	2.26193	0.935014	1.8205	2.6586	1.09504	3.97298	3.33145	2.22266	1.87664	5.0338	4.42527	4.23736	1.85156	1.06645	2.142	2.802	1.30402	NA	NA
dd_Smed_v6_10036_0_1	1359	-0.113766	3.98075	0.134417	0.713895	0.816662	-0.035748	3.98075	0.0133328	0.908074	0.952524	12.3852	16.4228	18.5983	12.7274	14.0575	13.9542	23.0887	12.2762	15.204	16.4001	17.7259	15.6725	7.27723	11.1491	10.4647	8.32483	8.21603	10.1112	13.8058	8.17328	16.7122	15.5484	19.5107	13.9101	6.86591	9.22017	9.15446	6.68787	7.95379	8.54858	12.4537	6.69046	19.0614	18.2943	20.5631	16.5647	NA	NA
dd_Smed_v6_10037_0_1	1378	-0.608097	2.92987	1.71422	0.190439	0.323379	-0.102624	2.92987	0.0495439	0.823859	0.904489	8.6824	2.28537	7.52788	4.43463	10.4519	10.8063	6.5122	4.80925	8.96305	7.62121	9.31913	9.06645	5.03123	1.5301	4.1773	2.86064	6.02444	7.72228	3.84027	3.15776	9.7163	7.12582	10.116	7.93599	4.74685	1.26537	3.65429	2.29814	5.83216	6.52883	3.46416	2.58487	11.0821	8.38425	10.6617	9.45047	NA	NA
dd_Smed_v6_10039_0_1	1058	1.77273	1.42207	3.65203	0.056001	0.121839	0.0810548	1.42207	0.00800774	0.928696	0.962262	5.95851	2.01963	6.45247	5.14418	2.46463	0	2.18307	1.39215	0.431554	1.95354	1.30338	2.02226	4.49713	1.76116	4.66351	4.32201	1.85029	0	1.67673	1.19056	0.609318	2.37901	1.84276	2.30549	4.24294	1.45646	4.07962	3.47214	1.79123	0	1.51252	0.974565	0.69497	2.79915	1.94216	2.74546	Contig4226	0.28824
dd_Smed_v6_1004_0_1	2311	0.140983	6.23663	0.292183	0.588825	0.721463	0.241325	6.23663	0.856371	0.354756	0.545676	79.7589	52.2447	81.5415	89.89	81.6068	78.228	90.2088	75.2605	62.5422	62.2479	86.2508	64.1729	27.5589	20.8571	26.9806	34.5754	28.0478	33.3335	31.7199	29.4658	40.4266	34.7044	55.8274	33.4939	26.0012	17.2486	23.6025	27.7766	27.1525	28.1819	28.6133	24.12	46.1094	40.8333	58.8388	39.8857	Contig5089	-0.361225
dd_Smed_v6_10040_0_1	871	-2.06542	0.0448745	1.30116	0.254002	0.401803	-2.9673	0.0448745	2.49586	0.114146	0.237928	0	0	0	1.95124	0.958469	0	0	0.0843728	1.59343	2.3153	1.72697	2.62893	0	0	0	1.99135	0.874041	0	0	0.0876466	2.73281	3.42492	2.96587	3.64061	0	0	0	1.59978	0.846143	0	0	0.0717454	3.11696	4.02976	3.12585	4.33537	Contig3409	0.171788
dd_Smed_v6_10041_0_1	1092	1.12955	2.86963	5.65365	0.0174191	0.0456812	0.60376	2.86963	1.6367	0.200778	0.365547	10.853	7.70649	3.92209	17.8272	5.34004	8.692	5.99419	8.01541	5.80938	4.0759	4.88766	3.67377	7.93616	6.51097	2.74642	14.5116	3.88413	7.8382	4.46057	6.64131	7.94698	4.80907	6.69518	4.05791	7.48759	5.3845	2.40256	11.6581	3.76016	6.62683	4.02371	5.43642	9.06408	5.65836	7.05632	4.8323	Contig1802	-0.0503983
dd_Smed_v6_10042_0_1	2420	-1.85021	2.16301	9.46759	0.00209134	0.00716815	-1.00148	2.16301	2.93089	0.0868998	0.193791	2.42596	1.75389	0.759114	3.23728	6.16158	3.05395	1.51705	4.09208	7.20363	8.5618	7.39665	6.50492	0.800483	0.66865	0.239863	1.18911	2.02232	1.2427	0.509409	1.52996	4.44663	4.55837	4.57198	3.2422	0.755238	0.552966	0.209832	0.955285	1.95777	1.05064	0.459518	1.25239	5.07169	5.36339	4.81859	3.86093	PL05002A1B12	-0.351514
dd_Smed_v6_10043_0_1	721	6.05319	4.42858	116.901	3.02e-27	1.29e-25	6.11517	4.42858	118.725	1.2e-27	5.88e-26	26.4302	17.4858	37.3231	43.9029	36.5587	27.1097	29.9709	36.9975	0.962698	0.627061	0.228091	0.0337043	29.2718	22.3749	39.5836	54.1269	40.2743	37.0261	33.7791	46.4288	1.99457	1.12056	0.473213	0.0563849	27.6173	18.5038	34.6275	43.4836	38.9888	31.3038	30.4708	38.0055	2.27495	1.31845	0.498738	0.0671452	Contig1558	0.795813
dd_Smed_v6_10044_0_1	1649	0.783258	0.835613	0.803325	0.370101	0.526937	0.723123	0.835613	0.686574	0.407332	0.596748	3.02182	2.33852	0.569335	2.12862	1.73437	2.86601	2.84909	0.295305	1.62663	1.59177	0.619103	0.842607	1.46329	1.30838	0.26401	1.14745	0.835398	1.7115	1.404	0.162032	1.47354	1.24371	0.5616	0.616336	1.38058	1.08201	0.230955	0.92182	0.808734	1.44699	1.2665	0.132635	1.68067	1.46336	0.591893	0.733955	NA	NA
dd_Smed_v6_10046_0_1	1287	-0.255893	0.609691	0.0814985	0.775277	0.860211	-0.490304	0.609691	0.298101	0.585075	0.746608	2.72389	0.318889	1.26519	1.37474	0.273848	2.39617	1.36904	0.801541	1.99179	1.9053	1.72697	1.17965	1.69003	0.228598	0.751709	0.949502	0.169006	1.83341	0.864413	0.563505	2.31185	1.90742	2.0072	1.10557	1.59451	0.189048	0.657592	0.762796	0.163612	1.55006	0.779753	0.461272	2.63682	2.24427	2.11547	1.31656	NA	NA
dd_Smed_v6_10047_0_1	725	-2.03092	-0.592387	1.88647	0.169601	0.295318	-3.00248	-0.592387	3.80403	0.0511295	0.125869	0.212804	1.00982	0	0	0.410772	0.0939676	0.111003	0	0.763519	0.988828	2.02023	1.28076	0.234382	1.28504	0	0	0.450023	0.127632	0.124417	0	1.57317	1.75729	4.16819	2.13081	0.221135	1.06271	0	0	0.43566	0.107907	0.112232	0	1.79431	2.06763	4.39302	2.53744	NA	NA
dd_Smed_v6_10048_0_1	2766	-2.89458	0.846243	4.62178	0.0315684	0.0755341	-9.8467	0.846243	25.09	5.47e-07	4.46e-06	0.170243	0	0	2.21732	0	0	0	0	5.17865	3.97943	4.46406	4.38156	0.0491474	0	0	0.712575	0	0	0	0	2.79678	1.85365	2.41414	1.91069	0.0463695	0	0	0.572458	0	0	0	0	3.18993	2.18101	2.54436	2.27531	PL04022B2C08	0.0857195
dd_Smed_v6_1005_0_1	423	1.37549	2.79516	0.764367	0.381965	0.53911	-3.04436	2.79516	3.308	0.0689434	0.160355	0	30.1882	0.822373	26.5635	0	2.67808	0	0	0.630733	7.0665	0.325844	14.1558	0	65.8428	1.48662	55.8212	0	6.2345	0	0	2.22741	21.5241	1.15227	40.3652	0	54.4512	1.30049	44.8448	0	5.27098	0	0	2.54051	25.3252	1.21442	48.0683	Contig1361	-2.13586
dd_Smed_v6_10050_0_1	560	1.08715	3.39339	5.56254	0.0183488	0.0477098	0.614917	3.39339	1.80353	0.179286	0.335868	8.55472	17.1137	9.10936	22.3506	6.29851	10.4304	14.6155	9.82943	10.822	4.00355	8.40677	3.67377	12.1983	28.1948	12.4386	35.4777	8.9335	18.3414	21.2084	15.8815	28.868	9.21122	22.4556	7.91292	11.5089	23.3167	10.8813	28.5015	8.64836	15.5068	19.1312	13.0002	32.9259	10.8379	23.6669	9.42299	NA	NA
dd_Smed_v6_10051_0_1	2128	4.2524	3.29572	58.8694	1.68e-14	2.95e-13	4.24516	3.29572	58.744	1.8e-14	3.67e-13	9.91666	11.2143	18.0922	17.9603	8.99135	15.9745	9.13928	22.7806	0.298768	0.434119	0.782025	1.48299	3.72115	4.86196	6.50119	7.50233	3.35602	7.39221	3.48998	9.68602	0.209729	0.262844	0.54971	0.84058	3.51082	4.02078	5.68721	6.02711	3.24891	6.24977	3.14818	7.92875	0.23921	0.309263	0.579361	1.00099	PL08004A2G12	0.433905
dd_Smed_v6_10052_0_1	1008	-4.82589	1.31211	23.9104	1.01e-06	6.78e-06	-5.33638	1.31211	27.9396	1.25e-07	1.14e-06	0	0.212593	0.379557	0.354771	0.0456414	0.0469838	0.33301	0.210932	4.94627	7.8865	6.84272	7.31383	0	0.194581	0.287931	0.312854	0.0359642	0.0458993	0.26846	0.189336	7.33014	10.0805	10.1544	8.7518	0	0.160916	0.251881	0.251336	0.0348163	0.0388058	0.242168	0.154986	8.36053	11.8608	10.7021	10.422	Contig2876	-0.0907246
dd_Smed_v6_10053_0_1	829	-0.651064	2.82569	1.30964	0.252459	0.400181	-0.26608	2.82569	0.221406	0.637971	0.784695	6.34156	7.86593	5.94639	1.55212	8.67186	8.4101	9.7683	1.47652	8.19953	10.66	8.79778	6.40381	6.10836	8.75402	5.48494	1.66428	8.30863	9.99	9.57519	1.61152	14.7751	16.5678	15.8746	9.31746	5.7631	7.23947	4.7982	1.33702	8.04344	8.44608	8.63741	1.31916	16.852	19.4937	16.7309	11.0956	PL04015B2B07	-0.212387
dd_Smed_v6_10054_0_1	1094	0.852062	1.14776	1.36836	0.242093	0.388179	0.460608	1.14776	0.403101	0.525492	0.699946	4.25608	1.80704	3.66905	1.37474	2.82976	0.939676	2.07206	2.61556	1.09548	1.95354	1.33596	1.75262	3.10653	1.52392	2.56454	1.11701	2.05449	0.845823	1.53911	2.1632	1.49583	2.30072	1.82667	1.93234	2.93094	1.26026	2.24345	0.897367	1.98892	0.715104	1.38837	1.77075	1.7061	2.70704	1.9252	2.3011	NA	NA
dd_Smed_v6_10056_0_1	1497	-0.381165	2.4388	0.238804	0.625072	0.751711	-0.227922	2.4388	0.0857383	0.769667	0.872258	4.29864	4.4113	4.87098	5.18852	6.89185	0	6.5492	7.4248	3.91718	6.05355	6.2562	8.22384	2.29294	2.71867	2.4881	3.0809	3.65667	0	3.55508	4.4876	3.90883	5.21013	6.25134	6.62623	2.16334	2.24831	2.17658	2.47508	3.53996	0	3.2069	3.67344	4.45829	6.13025	6.58854	7.89075	NA	NA
dd_Smed_v6_10058_0_1	3698	-6.81479	1.59888	31.2136	2.31e-08	2e-07	-5.3581	1.59888	23.5049	1.25e-06	9.53e-06	0	0	0.316297	0	0.0912827	0	0.370012	0.337491	5.54381	10.3465	7.82025	10.2798	0	0	0.0654035	0	0.0196062	0	0.0813076	0.0825745	2.23942	3.60485	3.16328	3.35298	0	0	0.0572148	0	0.0189804	0	0.0733444	0.0675936	2.55422	4.24147	3.33391	3.99285	NA	NA
dd_Smed_v6_10059_0_1	942	3.70599	3.43055	90.9261	1.49e-21	4.64e-20	3.39425	3.43055	78.1104	9.74e-19	2.83e-17	17.6202	18.2298	20.6226	11.8848	17.5719	13.0145	11.7664	12.6981	1.32786	1.37471	1.53147	0.977424	14.9363	17.8543	16.7404	11.2149	14.8163	13.6049	10.1502	12.1966	2.1057	1.88027	2.43187	1.25154	14.092	14.7653	14.6444	9.00968	14.3434	11.5023	9.15609	9.98385	2.40169	2.21233	2.56305	1.49038	Contig3003	0.516411
dd_Smed_v6_1006_0_1	3499	0.465724	5.99196	3.05536	0.0804714	0.163775	0.0883309	5.99196	0.110316	0.739785	0.853675	59.883	79.5097	85.1472	81.3755	60.064	39.9362	57.6108	77.8339	57.7619	61.862	46.4653	55.3761	13.666	20.9647	18.608	20.6731	13.6346	11.2394	13.3796	20.1268	24.6599	22.7793	19.8641	19.0894	12.8936	17.3375	16.2782	16.608	13.1994	9.50237	12.0692	16.4754	28.1264	26.8022	20.9356	22.7323	Contig5315	-0.146872
dd_Smed_v6_10061_0_1	1607	-2.25095	1.27711	3.35195	0.0671255	0.141739	-4.20095	1.27711	9.74522	0.00179789	0.00714371	0.383047	2.60426	0	1.64081	0	0.939676	0	0.253118	3.18686	5.35414	5.80002	7.78569	0.190335	1.49514	0	0.907609	0	0.575813	0	0.142514	2.96239	4.29273	5.39881	5.84379	0.179577	1.23646	0	0.729141	0	0.486823	0	0.116659	3.37881	5.05084	5.69002	6.95899	NA	NA
dd_Smed_v6_10062_0_1	2910	-2.98091	1.99781	11.6186	0.000652958	0.00249484	-1.95884	1.99781	5.47318	0.0193105	0.0565202	2.59621	0	0.442816	1.19735	0.638979	3.10093	1.99806	2.95305	7.93396	11.2389	5.76743	8.89793	0.712409	0	0.11636	0.365749	0.174408	1.04934	0.557954	0.918181	4.07279	4.97611	2.96465	3.68816	0.672143	0	0.101791	0.29383	0.168841	0.887172	0.503309	0.751601	4.64529	5.8549	3.12457	4.39199	Contig4658	0.0504247
dd_Smed_v6_10064_0_1	1840	-1.55244	2.07692	3.23828	0.071936	0.149778	-0.509318	2.07692	0.366045	0.545168	0.715578	2.63877	1.91333	3.73231	0	7.62211	1.08063	5.47617	2.86867	5.84258	5.23355	4.13822	9.06645	1.14516	0.959368	1.55107	0	3.29025	0.578332	2.41848	1.41063	4.74331	3.6647	3.36418	5.94337	1.08043	0.793386	1.35687	0	3.18523	0.488953	2.18161	1.15471	5.41007	4.3119	3.54565	7.07758	NA	NA
dd_Smed_v6_10065_0_1	3414	0.416464	1.43646	0.235109	0.627761	0.753395	-0.912208	1.43646	1.10506	0.293159	0.480406	4.21352	4.4113	2.6569	3.41467	2.05386	1.08063	2.70108	0	1.95859	3.47296	3.51911	2.05596	0.985518	1.19211	0.595092	0.889079	0.477837	0.311696	0.64292	0	0.856989	1.31068	1.54189	0.726381	0.929814	0.985858	0.520584	0.714254	0.462585	0.263525	0.579954	0	0.977455	1.54215	1.62506	0.865001	NA	NA
dd_Smed_v6_10066_0_1	2887	0.143085	3.53504	0.120597	0.728388	0.827133	0.321065	3.53504	0.608399	0.435391	0.621957	17.7053	8.18482	13.9803	5.63199	17.8458	6.81265	13.0984	13.7106	8.96305	9.33357	9.09104	13.8188	4.8971	2.61562	3.70291	1.73408	4.90976	2.32374	3.68684	4.29694	4.63771	4.16544	4.71033	5.77345	4.62031	2.16309	3.23929	1.3931	4.75305	1.96462	3.32576	3.51738	5.28963	4.90107	4.96441	6.87523	NA	NA
dd_Smed_v6_10067_0_1	525	-0.477354	2.11038	0.527961	0.467465	0.61889	-0.147712	2.11038	0.0510161	0.821305	0.902968	6.04363	0.690926	4.93424	2.26166	6.80056	4.51045	4.47714	1.72964	5.84258	3.2559	3.94271	6.37011	9.19225	1.21418	7.18677	3.82934	10.2886	8.46017	6.92985	2.9809	16.6242	7.99045	11.2336	14.6353	8.67268	1.00412	6.28695	3.07635	9.96024	7.15268	6.25115	2.4401	18.961	9.40158	11.8396	17.4282	NA	NA
dd_Smed_v6_10068_0_1	958	0.257949	2.52224	0.126562	0.722023	0.822379	0.38683	2.52224	0.284716	0.593626	0.751965	6.5118	0.0531482	8.98284	7.67192	7.85032	5.40314	5.51317	6.62326	6.5397	4.31708	4.00788	4.55008	5.42774	0.0511841	7.17003	7.11858	6.50869	5.55392	4.67648	6.25543	10.1973	5.8061	6.25797	5.72884	5.12095	0.0423286	6.27231	5.71882	6.30095	4.69558	4.21847	5.12055	11.6308	6.83147	6.59553	6.82211	NA	NA
dd_Smed_v6_10069_0_1	3225	-0.740217	2.67646	1.75621	0.185097	0.316346	-0.566114	2.67646	1.03661	0.308612	0.497864	6.299	2.01963	9.42566	2.21732	8.12416	2.67808	3.62611	8.0576	9.52739	8.39298	7.65733	7.71828	1.55964	0.577769	2.23488	0.611158	2.00088	0.817734	0.91368	2.26062	4.41305	3.3531	3.55166	2.88672	1.47149	0.477808	1.95507	0.490982	1.93702	0.691356	0.824196	1.85049	5.03339	3.94526	3.74324	3.43761	NA	NA
dd_Smed_v6_1007_0_1	675	0.269116	7.17601	0.941344	0.331932	0.488678	0.40486	7.17601	2.12771	0.144657	0.284292	156.922	134.465	122.597	178.228	146.144	169.799	202.359	132.381	123.856	119.745	162.401	85.474	185.636	183.788	138.883	234.708	171.968	247.714	243.614	177.448	274.099	228.566	359.889	152.737	175.143	151.991	121.494	188.556	166.479	209.431	219.755	145.255	312.629	268.932	379.301	181.884	Contig4443	-0.165742
dd_Smed_v6_10070_0_1	2531	1.67752	3.06475	13.848	0.000198203	0.000841772	1.57794	3.06475	12.3292	0.000445919	0.00203955	14.0451	13.1276	9.48892	7.67192	10.7714	13.9542	11.4334	5.23111	1.79261	4.36531	3.09552	4.58378	4.43113	4.78526	2.8668	2.69443	3.38026	5.42914	3.67083	1.87005	1.05801	2.2222	1.82947	2.18446	4.18067	3.95735	2.50786	2.16461	3.27237	4.59009	3.31131	1.53078	1.20673	2.61465	1.92815	2.60134	NA	NA
dd_Smed_v6_10072_0_1	2316	-3.73476	2.15774	7.92124	0.00488578	0.0152446	-3.6794	2.15774	7.75246	0.00536396	0.0187596	0	2.71056	0.695854	0	0	1.7384	1.70205	0.0843728	8.26592	12.5895	14.7933	9.77424	0	1.07977	0.229748	0	0	0.739146	0.597196	0.0329621	5.33148	7.00372	9.55457	5.09047	0	0.892959	0.200983	0	0	0.624914	0.538708	0.026982	6.08092	8.24059	10.0699	6.06191	NA	NA
dd_Smed_v6_10073_0_1	2193	0.487727	4.36873	2.4302	0.119017	0.22466	0.251582	4.36873	0.648979	0.420478	0.60767	13.7471	23.7572	30.4278	28.5147	18.9412	18.6056	17.5385	26.7462	20.5154	14.2054	16.0315	17.9981	5.00561	9.99469	10.6097	11.5581	6.86025	8.35456	6.49887	11.035	13.9745	8.34591	10.935	9.89922	4.72268	8.26549	9.28136	9.28534	6.64129	7.06339	5.86238	9.03302	15.9389	9.81981	11.5249	11.7883	NA	NA
dd_Smed_v6_10074_0_1	1298	0.116477	2.58514	0.0511689	0.821042	0.888402	-0.483893	2.58514	0.875983	0.349304	0.540073	5.95851	5.15537	4.6812	11.7074	2.32771	3.57077	3.81112	8.43728	4.58111	5.88473	7.78767	7.14531	3.66561	3.66436	2.75775	8.01756	1.42438	2.70898	2.38595	5.88137	5.27219	5.84133	8.97464	6.63987	3.45842	3.03038	2.41247	6.44102	1.37892	2.29032	2.15227	4.81435	6.0133	6.87292	9.45874	7.90699	PL030012B10F08	0.177714
dd_Smed_v6_10075_0_1	3368	-3.84423	1.65177	12.2607	0.000462592	0.00182536	-2.84339	1.65177	7.40559	0.00650215	0.0221505	1.44707	0	0.632595	0	2.14514	0.939676	0.444014	0.674982	10.4237	8.82709	2.76967	8.22384	0.343083	0	0.143624	0	0.50589	0.274742	0.107129	0.181331	4.62322	3.3768	1.2301	2.94521	0.323692	0	0.125641	0	0.489743	0.232282	0.0966369	0.148433	5.2731	3.97315	1.29645	3.50726	Contig6638	-0.618146
dd_Smed_v6_10076_0_1	568	0.625803	2.97392	1.71777	0.18998	0.322843	0.765621	2.97392	2.57007	0.108903	0.229955	6.59692	14.6157	4.04861	8.69188	6.0703	7.61138	14.3564	9.36538	7.60199	5.95708	5.40901	3.03338	9.27419	23.7402	5.45042	13.6026	8.48856	13.1957	20.5391	14.9186	19.9928	13.5128	14.2447	6.44158	8.75	19.6329	4.768	10.9278	8.21762	11.1564	18.5275	12.212	22.8032	15.8992	15.0131	7.67087	Contig6925	-0.0475551
dd_Smed_v6_10078_0_1	2286	-1.16596	3.38911	8.0682	0.00450488	0.0142079	-0.447698	3.38911	1.22991	0.267425	0.451124	6.17131	6.69667	9.48892	3.19294	11.2278	6.15488	8.36226	16.1996	14.7724	12.4206	14.5978	15.4366	2.15568	2.70268	3.17405	1.24156	3.90112	2.65132	2.97256	6.41177	9.65318	7.00048	9.55203	8.14493	2.03384	2.23509	2.77664	0.997429	3.77661	2.24157	2.68143	5.24853	11.0101	8.23678	10.0673	9.69928	PL06012A1G11	0.018019
dd_Smed_v6_10079_0_1	1269	-12.0025	2.77115	103.032	3.3e-24	1.19e-22	-7.73997	2.77115	79.7521	4.24e-19	1.28e-17	0	0	0	0	0	0.37587	0	0	18.8888	19.4389	19.5832	22.3796	0	0	0	0	0	0.291672	0	0	22.235	19.7365	23.0838	21.2718	0	0	0	0	0	0.246595	0	0	25.3606	23.222	24.3289	25.3313	Contig5020	0.0545743
dd_Smed_v6_1008_0_1	1002	5.88872	7.43381	211.187	7.57e-48	8.87e-46	5.55056	7.43381	193.579	5.26e-44	5.81e-42	334.953	290.88	236.843	284.526	195.847	280.446	273.142	158.072	4.87988	5.74002	6.64721	2.05596	266.931	267.829	180.745	252.412	155.246	275.614	221.516	142.738	7.27505	7.38085	9.9233	2.47492	251.844	221.492	158.115	202.779	150.291	233.019	199.821	116.842	8.2977	8.68432	10.4586	2.94722	Contig758	4.26327
dd_Smed_v6_10081_0_1	1157	0.7096	3.41113	3.66703	0.055499	0.120961	0.702763	3.41113	3.60482	0.0576122	0.138785	11.917	9.61982	11.6397	15.4325	9.67597	11.9809	8.10325	18.6464	7.63519	5.64355	7.26632	9.20127	8.22465	7.67089	7.69277	11.8566	6.64252	10.197	5.69126	14.5818	9.85782	6.28463	9.39432	9.59241	7.75978	6.34373	6.7296	9.52514	6.43051	8.62112	5.13387	11.9363	11.2435	7.3945	9.90105	11.423	NA	NA
dd_Smed_v6_10082_0_1	2522	-1.12329	1.2544	2.47839	0.11542	0.219447	0.30089	1.2544	0.186198	0.6661	0.804513	2.21316	0.531482	1.01215	0.931273	2.37335	3.57077	3.55211	3.16398	1.82581	4.12413	1.98765	2.32559	0.700731	0.194426	0.306883	0.328237	0.747462	1.39423	1.14452	1.13511	1.08144	2.10692	1.1789	1.11225	0.661124	0.160788	0.26846	0.263694	0.723604	1.17876	1.03243	0.929177	1.23346	2.47901	1.2425	1.32451	PL08001B1H01	0.156272
dd_Smed_v6_10083_0_1	884	-4.38376	1.14362	8.91893	0.0028223	0.00935431	-4.19907	1.14362	8.33126	0.00389686	0.0142034	1.06402	0	0	0	0.638979	0.516822	0	0.0843728	5.37783	7.54885	5.44159	4.61749	0.961126	0	0	0	0.574125	0.575715	0	0.0863576	9.0876	11.0024	9.20784	6.30038	0.906802	0	0	0	0.5558	0.48674	0	0.0706903	10.365	12.9455	9.70452	7.50272	NA	NA
dd_Smed_v6_10084_0_1	523	1.80592	0.770105	2.80152	0.0941749	0.185943	0.608587	0.770105	0.332993	0.563902	0.729866	0.808655	6.53723	2.59364	1.50778	2.87541	0.845708	1.25804	0	0.464751	0.699415	0.847194	1.24706	1.23465	11.532	3.79211	2.56266	4.36686	1.59235	1.95468	0	1.32743	1.72303	2.42307	2.87606	1.16487	9.53681	3.31732	2.05875	4.22748	1.34626	1.76324	0	1.51403	2.02732	2.55377	3.42492	Contig2791	-0.0620335
dd_Smed_v6_10086_0_1	2879	-2.42553	2.56929	7.47906	0.00624207	0.018828	-2.37207	2.56929	7.2015	0.00728426	0.0244721	0.468169	7.22815	1.77127	0	3.4231	2.0203	1.36904	2.99523	10.0585	14.6877	11.8281	14.2569	0.129851	2.31632	0.470451	0	0.944387	0.691025	0.386419	0.941325	5.219	6.57313	6.14552	5.97306	0.122511	1.91557	0.411549	0	0.914245	0.58423	0.348573	0.770547	5.95263	7.73396	6.47701	7.11294	Contig3841	0.0558272
dd_Smed_v6_10087_0_1	1798	0.334949	1.77119	0.249927	0.617127	0.745158	0.742241	1.77119	1.22301	0.26877	0.452579	4.21352	1.59445	0.822373	6.16414	2.82976	4.41648	3.62611	6.15921	3.28645	1.7606	2.63933	2.49412	1.87128	0.818148	0.349745	3.04746	1.25006	2.41883	1.63883	3.09946	2.73044	1.26162	2.19578	1.67317	1.76551	0.676599	0.305956	2.44822	1.21017	2.04501	1.47833	2.53715	3.11425	1.48443	2.31422	1.99247	NA	NA
dd_Smed_v6_1009_0_1	708	1.04968	7.46663	16.4065	5.11e-05	0.000244935	0.867773	7.46663	11.2886	0.000779855	0.00337201	218.039	183.414	261.515	234.326	210.635	171.679	203.247	205.405	99.5894	108.65	134.834	90.3612	245.914	239.008	282.446	294.2	236.303	238.782	233.278	262.5	210.123	197.724	284.873	153.944	232.015	197.657	247.083	236.35	228.761	201.879	210.431	214.876	239.66	232.642	300.239	183.322	Contig5190	0.824981
dd_Smed_v6_1009_1_1	1216	3.40152	5.36096	153.21	3.45e-35	2.3e-33	3.29658	5.36096	145.216	1.93e-33	1.33e-31	49.9664	66.9136	57.1866	69.1359	55.0891	62.1126	53.4297	55.5173	6.34053	4.82355	6.12586	5.72973	32.8116	50.7683	35.9611	50.5389	35.9836	50.2996	35.7052	41.3091	7.78908	5.11085	7.5356	5.68347	30.957	41.9848	31.4586	40.6011	34.8351	42.526	32.2083	33.8146	8.88399	6.01344	7.94208	6.76808	PL05007B1C09	2.08704
dd_Smed_v6_10090_0_1	436	-0.517283	1.43423	0.288156	0.591405	0.724084	-1.50418	1.43423	2.33743	0.126298	0.257057	4.85193	0	2.78342	3.0599	2.46463	0.187935	1.85006	0.885914	4.64751	2.89413	4.72473	3.06709	8.8861	0	4.88162	6.23843	4.48991	0.424464	3.44811	1.83847	15.9231	8.55247	16.2097	8.48503	8.38384	0	4.27043	5.01174	4.3466	0.358864	3.11041	1.50493	18.1614	10.0629	17.0841	10.1043	Contig2623	-0.362656
dd_Smed_v6_10092_0_1	1759	0.546207	1.43521	0.517359	0.471971	0.623284	0.107468	1.43521	0.0200914	0.887282	0.941427	3.95815	5.8463	2.0243	1.19735	4.7467	2.72506	1.55405	0.590609	2.88809	2.5806	1.79214	1.65151	1.79684	3.06639	0.879999	0.605077	2.14337	1.52556	0.717929	0.303798	2.45267	1.89023	1.52402	1.13247	1.69528	2.53587	0.76982	0.486098	2.07496	1.28979	0.647616	0.248682	2.79745	2.22405	1.60623	1.34859	NA	NA
dd_Smed_v6_10093_0_1	966	-0.0833077	0.0938163	0.00624783	0.936998	0.96321	0.761614	0.0938163	0.523326	0.469426	0.651631	0.297925	0.159445	0.379557	2.21732	0.410772	1.69142	2.70108	0.717168	0.365161	0.844121	1.40113	0.640381	0.246271	0.152281	0.30045	2.04036	0.33775	1.72422	2.27218	0.67173	0.56468	1.12587	2.16963	0.799604	0.232351	0.125934	0.262833	1.63915	0.32697	1.45775	2.04965	0.549863	0.644056	1.3247	2.28666	0.952197	NA	NA
dd_Smed_v6_10094_0_1	2772	-6.90572	1.58404	23.7515	1.1e-06	7.29e-06	-2.5802	1.58404	5.32674	0.0210006	0.0604833	0	0	0.253038	0	0.456414	3.33585	1.14704	0	6.04176	7.33179	9.35172	6.87567	0	0	0.0698015	0	0.130779	1.18504	0.336253	0	3.25585	3.40782	5.04641	2.99182	0	0	0.0610621	0	0.126605	1.00189	0.303321	0	3.71353	4.00965	5.31862	3.56276	NA	NA
dd_Smed_v6_10095_0_1	2661	-1.72732	3.77542	16.2	5.7e-05	0.000270078	-1.04637	3.77542	6.20633	0.0127295	0.039428	7.53326	5.20852	12.2091	2.70513	12.095	7.00059	9.99031	15.1449	27.9514	17.003	27.5338	18.9081	2.26059	1.80585	3.50841	0.903645	3.6102	2.59065	3.05082	5.14959	15.6911	8.23268	15.4777	8.5707	2.13281	1.49342	3.06915	0.725956	3.49497	2.19027	2.75203	4.21533	17.8968	9.68659	16.3125	10.2063	NA	NA
dd_Smed_v6_10096_0_1	1521	-0.598684	2.37035	0.535114	0.464465	0.616097	-0.291953	2.37035	0.128276	0.720226	0.841866	6.34156	0	6.38921	3.54771	6.29851	3.80569	1.51705	8.52165	5.6766	5.04061	7.13598	6.80826	3.32928	0	3.21211	2.07336	3.28913	2.4639	0.810499	5.06927	5.57511	4.26986	7.01792	5.39909	3.1411	0	2.80994	1.66566	3.18414	2.08311	0.73112	4.14958	6.3588	5.02393	7.39648	6.42943	PL05005B1A05	-0.176377
dd_Smed_v6_10097_0_1	1440	-1.22722	2.51937	5.1589	0.0231276	0.0580887	-1.092	2.51937	4.12903	0.0421535	0.107729	4.1284	7.175	2.72016	1.2417	5.75081	3.52379	4.69915	2.7843	11.0876	7.23532	8.70003	8.72941	2.2893	4.59697	1.44446	0.766494	3.17204	2.40972	2.65179	1.74946	11.5019	6.47375	9.03738	7.31199	2.1599	3.80164	1.2636	0.615774	3.0708	2.0373	2.39208	1.43207	13.1187	7.61702	9.52486	8.70738	NA	NA
dd_Smed_v6_10099_0_1	795	-5.37089	1.52453	14.9928	0.00010792	0.000485327	-4.96678	1.52453	13.4188	0.000249113	0.00119604	0.723533	0	0	0	0.273848	0	0.666021	0.0421864	7.83437	7.59709	6.38654	9.77424	0.726733	0	0	0	0.273599	0	0.680774	0.0480127	14.7208	12.3123	12.0166	14.8296	0.685656	0	0	0	0.264866	0	0.6141	0.039302	16.7901	14.4867	12.6648	17.6596	NA	NA
dd_Smed_v6_101_0_1	502	4.20835	12.4895	107.987	2.71e-25	1.05e-23	6.34884	12.4895	200.602	1.54e-45	1.86e-43	3176.1	2180.83	4153.74	3120.39	13898.9	12648.5	15409.3	13735.1	97.3321	151.001	168.07	266.87	5052.12	4008.02	6327.16	5525.35	21991.2	24811.6	24943.7	24755.9	289.632	387.558	500.808	641.224	4766.56	3314.59	5534.97	4438.87	21289.3	20977	22500.8	20264.6	330.346	456.002	527.822	763.593	Contig6658	-1.35649
dd_Smed_v6_1010_0_1	1479	-1.88714	7.51369	49.88	1.63e-12	2.33e-11	-1.19971	7.51369	20.9753	4.65e-06	3.18e-05	102.529	101.566	66.9285	76.3201	161.662	139.448	129.652	128.711	324.363	342.689	340.311	277.69	55.3556	63.3568	34.6032	45.8697	86.8182	92.8459	71.2351	78.7403	327.61	298.533	344.185	226.467	52.2268	52.3953	30.2707	36.8501	84.0472	78.4969	64.2584	64.455	373.662	351.254	362.751	269.685	Contig2691	-2.07256
dd_Smed_v6_10100_0_1	1524	-0.801196	0.706859	0.387389	0.533675	0.677002	-1.21952	0.706859	0.884034	0.347099	0.537867	2.68133	0.0531482	2.59364	0	1.46052	0	1.62805	0.885914	1.42745	1.7606	2.83484	3.26931	1.40491	0.0321748	1.30136	0	0.761194	0	0.868092	0.525966	1.39917	1.48845	2.78245	2.58753	1.3255	0.0266082	1.13842	0	0.736899	0	0.783072	0.430543	1.59585	1.75132	2.93254	3.08132	Contig7153	0.0607083
dd_Smed_v6_10101_0_1	2197	0.577667	2.91248	1.56225	0.211337	0.350078	0.965353	2.91248	4.34143	0.0371956	0.0973311	6.63948	5.31482	10.248	7.8493	8.48929	15.1288	12.1364	3.54366	5.80938	5.20943	4.07305	5.02194	2.41317	2.23188	3.56684	3.17582	3.06912	6.78099	4.48892	1.45939	3.94998	3.05507	2.77315	2.75711	2.27677	1.84574	3.12025	2.55134	2.97116	5.73301	4.04928	1.19462	4.50522	3.5946	2.92274	3.28327	NA	NA
dd_Smed_v6_10102_0_1	1131	-0.0668323	2.46654	0.022428	0.880954	0.927363	-0.199711	2.46654	0.200548	0.654278	0.796165	6.59692	4.305	5.81987	5.36591	4.56414	3.57077	5.88318	6.11702	6.10815	4.46178	6.51688	6.06677	4.6576	3.51174	3.93481	4.21731	3.20529	3.10898	4.227	4.8936	8.06755	5.08283	8.61909	6.47006	4.39434	2.90417	3.44215	3.38804	3.10299	2.6285	3.81302	4.00579	9.2016	5.98047	9.084	7.70478	NA	NA
dd_Smed_v6_10103_0_1	1789	1.5458	2.52489	10.3145	0.00131991	0.00475282	2.04319	2.52489	17.6323	2.68e-05	0.000156812	5.70314	4.67704	4.87098	9.49012	5.70517	9.30279	9.28729	10.6732	2.72211	1.7606	2.44383	1.5504	2.54558	2.41198	2.08199	4.71538	2.53297	5.12061	4.21853	5.398	2.27295	1.26797	2.04336	1.04531	2.4017	1.99467	1.82132	3.78817	2.45212	4.32924	3.80537	4.41868	2.59246	1.4919	2.15358	1.24479	Contig7148	-0.0947495
dd_Smed_v6_10105_0_1	1478	-1.08738	2.78209	4.49385	0.0340171	0.0805132	-1.2724	2.78209	6.1125	0.0134229	0.0412766	6.7246	2.39167	5.50357	5.72068	4.65542	1.59745	6.73421	4.89362	6.44012	12.0106	9.3843	15.4366	3.63308	1.49293	2.84736	3.44055	2.50182	1.06432	3.7025	2.99576	6.50899	10.4701	9.49756	12.5976	3.42773	1.23463	2.49086	2.76402	2.42197	0.899832	3.33988	2.45226	7.42396	12.3192	10.0099	15.0017	NA	NA
dd_Smed_v6_10106_0_1	1477	-0.207127	0.195012	0.0200747	0.887329	0.931357	0.463189	0.195012	0.100552	0.751169	0.860725	1.9578	0	1.45497	0	0	1.03364	1.07303	3.33272	1.59343	0.410002	1.40113	0.539268	1.05845	0	0.753261	0	0	0.689143	0.590358	2.0416	1.61156	0.357656	1.419	0.44039	0.998624	0	0.65895	0	0	0.582638	0.532539	1.6712	1.8381	0.420819	1.49554	0.524433	NA	NA
dd_Smed_v6_10107_0_1	3316	0.831918	3.89385	6.28146	0.0122008	0.0335012	0.843968	3.89385	6.47952	0.0109125	0.0345707	20.0036	15.2535	23.0264	10.8205	14.2401	14.0951	18.7966	22.4853	7.83437	10.1053	10.3944	10.4483	4.81699	4.24393	5.30988	2.9006	3.41091	4.18575	4.60625	6.1353	3.52926	3.92642	4.68889	3.80054	4.54473	3.50968	4.64507	2.33024	3.30204	3.53886	4.15512	5.02221	4.02537	4.61983	4.94181	4.52582	PL06020B1D05	0.0792324
dd_Smed_v6_10108_0_1	3058	-0.630622	1.72231	0.552042	0.457485	0.610103	-0.437801	1.72231	0.267903	0.604742	0.760326	4.554	0.0531482	2.90994	2.92686	4.60978	2.16126	4.58814	0.590609	4.78029	4.19649	2.7045	4.51637	1.18916	0.0160348	0.727643	0.850784	1.19733	0.695965	1.21922	0.174749	2.33513	1.76811	1.32292	1.78142	1.12194	0.0132606	0.636539	0.68349	1.15912	0.588406	1.09981	0.143045	2.66338	2.08036	1.39428	2.12138	PL06014A2E04	-0.223304
dd_Smed_v6_10109_0_1	888	-0.287128	1.44604	0.0685198	0.793504	0.871892	0.147438	1.44604	0.0181629	0.892794	0.944491	3.10694	0	4.80772	0.975619	2.92105	0.0469838	7.21522	1.81401	3.31965	3.73825	1.85731	1.92114	2.79385	0	4.13999	0.976613	2.61275	0.052102	6.60267	1.84833	5.58436	5.42395	3.12864	2.60952	2.63593	0	3.62164	0.784576	2.52936	0.0440498	5.95601	1.513	6.36935	6.38183	3.2974	3.10751	NA	NA
dd_Smed_v6_1011_0_1	720	0.378102	5.3091	1.36648	0.242418	0.388578	0.46004	5.3091	2.02291	0.154942	0.300491	45.1995	61.6519	39.0943	21.9958	38.43	47.7825	56.9078	34.5928	28.6154	36.249	40.8608	23.4582	50.1285	78.9998	41.5197	27.1558	42.3946	65.3515	64.2276	43.4715	59.3692	64.8669	84.8904	39.2984	47.2951	65.3319	36.3213	21.816	41.0414	55.2516	57.9372	35.5847	67.7147	76.3226	89.4695	46.798	NA	NA
dd_Smed_v6_10110_0_1	3407	-0.307745	3.13254	0.328923	0.566294	0.703436	0.5623	3.13254	1.10175	0.293883	0.481182	11.4914	1.22241	10.0583	2.88251	12.1406	10.9002	14.9855	8.85914	7.60199	9.96063	8.17868	5.99936	2.6933	0.331022	2.25748	0.752063	2.83035	3.15052	3.57422	2.35272	3.33311	3.76682	3.59083	2.12396	2.54107	0.273751	1.97483	0.604181	2.74001	2.66362	3.22416	1.92588	3.80165	4.43205	3.78453	2.52929	PL06022A1H06	-0.046825
dd_Smed_v6_10111_0_1	542	-0.551473	2.6794	0.855253	0.35507	0.511426	-0.358734	2.6794	0.364716	0.545899	0.716018	5.14985	3.50778	10.0583	2.35036	3.24054	4.55743	2.14607	14.0902	6.27413	7.09062	8.79778	8.662	7.58715	5.97097	14.1904	3.85469	4.74886	8.28017	3.21756	23.5218	17.2922	16.8556	24.2805	19.2767	7.15831	4.93792	12.4137	3.09672	4.59729	7.0005	2.90244	19.2544	19.7229	19.8324	25.5902	22.9554	NA	NA
dd_Smed_v6_10112_0_1	6052	-1.92477	2.20804	5.66045	0.0173517	0.0455591	-1.27145	2.20804	2.57997	0.108224	0.228966	1.14914	0	3.79557	3.59205	5.06619	3.99362	2.55308	1.81401	11.0212	7.57297	6.48429	7.34753	0.15162	0	0.479568	0.527593	0.664897	0.649811	0.342806	0.271202	2.72036	1.61223	1.60268	1.46439	0.14305	0	0.419524	0.423849	0.643675	0.549385	0.309232	0.221999	3.10275	1.89696	1.68913	1.74384	Contig5771	-0.134309
dd_Smed_v6_10113_0_1	1793	-0.146283	2.81189	0.0740372	0.785547	0.867357	-0.2639	2.81189	0.240987	0.623494	0.775296	2.25572	14.0311	2.97319	8.24842	4.29029	9.39676	5.80918	5.86391	5.90897	8.32062	7.75508	8.45977	1.00459	7.21978	1.26799	4.08927	1.90054	5.1608	2.6328	2.95909	4.92296	5.9791	6.46979	5.69104	0.947807	5.97067	1.10923	3.28517	1.83988	4.36321	2.37494	2.42224	5.61498	7.03502	6.81878	6.7771	NA	NA
dd_Smed_v6_10115_0_1	4543	-0.539544	3.89566	1.99275	0.158054	0.279358	-0.904156	3.89566	5.54031	0.0185833	0.054623	8.38447	22.5348	14.3599	9.75619	9.94982	6.85964	14.7265	11.1372	21.2457	26.3125	19.8113	12.538	1.47372	4.5764	2.41703	1.90894	1.73958	1.48688	2.63414	2.21812	6.98592	7.46241	6.52311	3.32888	1.39043	3.78462	2.1144	1.53358	1.68406	1.25709	2.37615	1.8157	7.96793	8.78028	6.87497	3.96415	Contig4686	-0.21777
dd_Smed_v6_10116_0_1	3582	0.377684	2.90406	0.830252	0.3622	0.518475	0.0647622	2.90406	0.0244403	0.87577	0.934204	11.3637	8.50371	6.7055	7.93799	7.98724	8.92692	7.43723	3.45928	6.44012	7.35591	5.73485	7.04419	2.53325	2.19026	1.43146	1.96988	1.7711	2.45412	1.68721	0.873799	2.68573	2.64589	2.39486	2.37202	2.39007	1.81132	1.25223	1.58253	1.71457	2.07484	1.52196	0.715271	3.06326	3.11315	2.52404	2.82469	PL08004A2A02	0.302083
dd_Smed_v6_10117_0_1	1618	-2.45534	2.33172	9.56513	0.00198308	0.00683899	-2.43123	2.33172	9.42894	0.00213588	0.00834033	0	4.62389	1.32845	1.95124	1.82565	1.64443	2.14607	2.40462	11.486	11.2148	10.818	9.84165	0	2.63658	0.627826	1.07198	0.896215	1.00082	1.07782	1.34468	10.6044	8.93041	10.0012	7.33673	0	2.18042	0.549219	0.861191	0.867609	0.846148	0.972262	1.10072	12.095	10.5075	10.5407	8.73684	NA	NA
dd_Smed_v6_10119_0_1	3645	-0.104541	3.20877	0.0510113	0.821313	0.888549	0.311216	3.20877	0.45411	0.50039	0.678831	5.74571	2.9763	13.2845	10.2884	13.3729	5.16822	12.8024	11.6856	8.19953	7.79003	7.95059	10.7517	1.25872	0.75334	2.78689	2.50902	2.91407	1.39625	2.85415	2.90072	3.36036	2.75361	3.26277	3.55788	1.18757	0.623003	2.43796	2.01565	2.82106	1.18046	2.57462	2.37446	3.83273	3.2399	3.43876	4.23685	NA	NA
dd_Smed_v6_1012_0_1	884	-0.451645	6.90044	2.76868	0.0961255	0.189006	-0.143673	6.90044	0.281517	0.595709	0.753803	94.6977	78.553	124.368	99.7349	150.89	103.787	100.051	137.148	115.922	120.348	128.35	178.767	85.5403	81.9828	107.579	100.288	135.575	115.614	91.9713	140.374	195.888	175.406	217.184	243.921	80.7053	67.7988	94.1101	80.568	131.248	97.7463	82.9638	114.907	223.424	206.383	228.899	290.47	Contig1990	-0.776832
dd_Smed_v6_10120_0_1	3321	-2.47186	1.43233	5.25111	0.0219327	0.0555336	-1.64128	1.43233	2.47005	0.116034	0.240756	0.340486	0	1.45497	1.95124	0.912827	3.05395	2.66408	0.0421864	5.47742	5.93297	5.57193	3.87599	0.0818679	0	0.33501	0.522272	0.218319	0.905548	0.651871	0.0114935	2.46378	2.30178	2.5097	1.40776	0.0772406	0	0.293065	0.419575	0.211351	0.765599	0.588028	0.00940835	2.81011	2.70827	2.64507	1.67641	NA	NA
dd_Smed_v6_10121_0_1	3764	-3.19294	1.0287	7.32524	0.00679931	0.0202622	-1.66999	1.0287	2.28204	0.130879	0.263804	1.02146	0	0.759114	0	2.28207	1.97332	0.185006	0.717168	3.38604	5.45061	3.77979	3.80858	0.216698	0	0.154216	0	0.481561	0.516258	0.0399409	0.172394	1.34381	1.86576	1.50211	1.22047	0.20445	0	0.134908	0	0.46619	0.436472	0.0360292	0.141118	1.53271	2.19526	1.58314	1.45338	PL06014B2G06	0.0134955
dd_Smed_v6_10122_0_1	750	-1.35149	1.90189	2.16517	0.141169	0.256486	-1.2579	1.90189	1.88816	0.16941	0.321677	3.74535	5.15537	0.569335	0	0.821545	2.81903	2.29407	4.17645	5.31144	5.74002	5.40901	7.75198	3.98762	6.34178	0.58047	0	0.870045	3.70132	2.48558	5.03845	10.579	9.86081	10.788	12.4671	3.76224	5.24457	0.507792	0	0.842275	3.1293	2.24215	4.12436	12.0661	11.6022	11.3699	14.8463	Contig3869	-0.0901707
dd_Smed_v6_10124_0_1	1375	-2.94551	0.533309	3.91744	0.0477875	0.106559	-4.28365	0.533309	7.26937	0.00701404	0.0236836	0	0	0.253038	1.50778	0.365131	0.328887	0	0	2.8549	3.4006	2.44383	5.05564	0	0	0.14072	0.974741	0.21092	0.235539	0	0	3.10158	3.1865	2.6586	4.43493	0	0	0.123101	0.783072	0.204188	0.199137	0	0	3.53756	3.74924	2.802	5.28127	NA	NA
dd_Smed_v6_10126_0_1	850	-0.345065	3.31397	0.409992	0.521973	0.667053	-0.475586	3.31397	0.777717	0.37784	0.56834	8.25679	2.28537	10.4378	16.1864	3.60567	7.09455	5.92018	17.3386	9.95894	8.44121	13.9787	14.8636	7.75668	2.48056	9.38995	16.9273	3.36929	8.21912	5.65977	18.4564	17.502	12.7952	24.5998	21.092	7.31825	2.05139	8.21429	13.5988	3.26175	6.94888	5.10546	15.1079	19.9623	15.0548	25.9268	25.1171	NA	NA
dd_Smed_v6_10127_0_1	933	0.364081	2.93315	0.646562	0.421345	0.5781	0.509058	2.93315	1.26558	0.260598	0.44285	9.23569	8.7163	5.12402	8.38146	6.02466	5.02727	9.6573	14.0902	4.51472	6.53591	9.12363	4.28044	7.90444	8.61912	4.19954	7.98533	5.12888	5.30602	8.41118	13.6643	7.22843	9.02578	14.6275	5.53376	7.45766	7.12791	3.67374	6.41513	4.96518	4.486	7.5874	11.1853	8.24452	10.6197	15.4165	6.5898	Contig4907	0.222179
dd_Smed_v6_10128_0_1	1530	-0.198516	2.70934	0.15814	0.690875	0.800071	0.232836	2.70934	0.218998	0.639805	0.785685	4.51144	7.81278	3.85883	5.98676	10.178	4.36949	10.2493	5.10455	2.8549	6.53591	6.35395	9.70683	2.35455	4.71114	1.92858	3.47821	5.28377	2.81228	5.4436	3.01868	2.78736	5.50395	6.21208	7.65243	2.22146	3.89606	1.68711	2.79427	5.11512	2.37765	4.91046	2.47102	3.17918	6.47596	6.54716	9.11279	NA	NA
dd_Smed_v6_10129_0_1	1277	-4.22353	0.0626129	5.55308	0.0184482	0.0479372	-2.7125	0.0626129	2.68233	0.101467	0.218683	0	0	0.506076	0	1.09539	0	0.33301	0	1.72622	2.38766	2.21574	3.1345	0	0	0.303038	0	0.68132	0	0.211909	0	2.01929	2.40902	2.59544	2.96067	0	0	0.265097	0	0.659573	0	0.191155	0	2.30314	2.83446	2.73544	3.52567	Contig1810	-0.00879509
dd_Smed_v6_1013_0_1	665	-5.66437	6.1086	11.3767	0.000743712	0.00280408	-6.38908	6.1086	13.5227	0.000235695	0.00113801	1.48963	14.2969	0	0	2.73848	6.81265	0	0	161.468	219.23	232.718	188.036	1.78871	19.835	0	0	3.27085	10.0882	0	0	362.709	424.756	523.47	341.062	1.68761	16.4033	0	0	3.16645	8.5291	0	0	413.695	499.768	551.707	406.149	Contig3290	-1.43798
dd_Smed_v6_10130_0_1	3170	7.35115	3.57603	35.528	2.51e-09	2.5e-08	7.50634	3.57603	36.5802	1.47e-09	1.78e-08	23.8766	0	19.8002	23.4592	16.796	24.5255	16.8725	16.5792	0.232375	0	0	0.168521	6.01446	0	4.77621	6.57823	4.20842	7.61865	4.32517	4.73213	0.109503	0	0	0.0641223	5.67451	0	4.17821	5.28472	4.0741	6.44122	3.90157	3.87361	0.124896	0	0	0.0763591	NA	NA
dd_Smed_v6_10131_0_1	2375	-4.37794	1.6295	9.67995	0.0018629	0.00647725	-3.41288	1.6295	6.47979	0.0109108	0.0345707	0	0	0.0632595	1.41908	0.0912827	0	1.40604	1.43434	5.34463	8.53768	8.04834	9.57201	0	0	0.0203674	0.531128	0.0305279	0	0.481081	0.546435	3.36162	4.63166	5.06906	4.86131	0	0	0.0178173	0.426689	0.0295535	0	0.433964	0.447299	3.83416	5.44962	5.34248	5.78902	NA	NA
dd_Smed_v6_10132_0_1	1788	-3.44571	1.64535	6.37846	0.0115514	0.0319921	-4.64381	1.64535	10.3175	0.00131776	0.00539425	0	1.22241	0.379557	1.33039	0	0	0	1.26559	7.80117	7.57297	8.9607	7.81939	0	0.630755	0.162324	0.661404	0	0	0	0.640438	6.51759	5.45706	7.49651	5.27495	0	0.521627	0.142	0.531348	0	0	0	0.524247	7.43376	6.42079	7.90087	6.28161	NA	NA
dd_Smed_v6_10133_0_1	1675	-0.456041	3.132	1.37071	0.24169	0.387786	-0.682831	3.132	3.05834	0.0803236	0.181728	9.57618	11.2674	5.94639	5.49895	5.2944	10.1485	5.55017	6.62326	11.0544	11.6971	11.0461	10.5157	4.56521	6.20614	2.71463	2.91823	2.51058	5.96631	2.69262	3.57773	9.85862	8.99754	9.86458	7.57248	4.30717	5.1324	2.37475	2.3444	2.43045	5.04424	2.4289	2.92865	11.2444	10.5865	10.3967	9.01758	PL06016B1C08	-0.0507721
dd_Smed_v6_10134_0_1	1559	-0.0960025	3.82904	0.0715634	0.789074	0.869202	-0.15948	3.82904	0.197825	0.656482	0.798107	7.19277	12.1709	15.8149	20.8871	15.655	8.92692	16.1695	12.8668	13.6106	12.903	15.6079	17.7959	3.68412	7.20261	7.75697	11.9093	7.97588	5.63864	8.42817	7.46753	13.0414	10.6636	14.9756	13.7685	3.47588	5.95647	6.78577	9.56754	7.72131	4.76721	7.60273	6.11274	14.8746	12.5468	15.7834	16.396	NA	NA
dd_Smed_v6_10135_0_1	1873	2.06706	1.33394	4.16294	0.0413176	0.0947985	2.56265	1.33394	6.19185	0.012834	0.039705	4.17096	2.81685	2.3406	1.77385	1.73437	8.692	5.03216	0.210932	0.0331965	0.988828	1.27079	0.337043	1.7782	1.38752	0.955569	0.841851	0.735489	4.56984	2.18323	0.101896	0.0264758	0.68021	1.01489	0.21705	1.67769	1.14746	0.835928	0.676313	0.712014	3.86359	1.96941	0.0834093	0.0301975	0.800336	1.06964	0.258471	Contig1568	0.667549
dd_Smed_v6_10136_0_1	2002	-2.43815	2.7095	9.27192	0.00232694	0.00791064	-2.90854	2.7095	12.6853	0.000368539	0.00171065	2.1706	0	2.78342	5.85372	3.33182	2.39617	1.36904	0.717168	10.0585	12.083	16.8787	19.717	0.865763	0	1.06313	2.5991	1.32187	1.17862	0.555694	0.324122	7.50525	7.77626	12.6113	11.8793	0.816828	0	0.930023	2.08802	1.27968	0.996467	0.50127	0.265318	8.56026	9.14956	13.2915	14.1463	NA	NA
dd_Smed_v6_10139_0_1	431	0.937686	0.779375	0.689935	0.406187	0.56325	0.682812	0.779375	0.368828	0.543644	0.714815	1.70243	6.21834	0.442816	0	1.82565	1.1746	0.925029	3.07961	2.09138	1.30236	0.488766	0.47186	3.1541	13.311	0.785632	0	3.36444	2.68367	1.74406	6.465	7.24853	3.89326	1.69632	1.32053	2.97582	11.008	0.687267	0	3.25706	2.26892	1.57325	5.2921	8.26745	4.58082	1.78782	1.57254	NA	NA
dd_Smed_v6_1014_0_1	317	0.381043	3.77326	0.0575862	0.810353	0.881443	-2.83649	3.77326	2.78496	0.0951531	0.208145	0	67.4982	0	19.5124	0	8.03423	0	1.30778	2.58932	23.2013	2.96518	38.0521	0	196.447	0	54.715	0	24.9577	0	3.73272	12.2017	94.3002	13.9919	144.788	0	162.459	0	43.9561	0	21.1005	0	3.05552	13.9169	110.954	14.7466	172.419	NA	NA
dd_Smed_v6_10140_0_1	2488	-5.45527	0.777885	15.245	9.44e-05	0.000428452	-9.92109	0.777885	29.6623	5.14e-08	4.98e-07	0	0	0	0.399117	0	0	0	0	3.15366	4.65472	4.13822	7.01049	0	0	0	0.142595	0	0	0	0	1.89348	2.41048	2.48798	3.39869	0	0	0	0.114556	0	0	0	0	2.15964	2.83618	2.62218	4.04728	PL08008B2E07	0.31723
dd_Smed_v6_10141_0_1	1967	0.556406	2.02794	0.909642	0.340209	0.496665	0.474315	2.02794	0.6639	0.415187	0.603373	2.04292	6.74982	6.57898	2.9712	5.2944	3.10093	2.73809	6.15921	3.41924	2.38766	2.96518	3.67377	0.829334	3.16592	2.55757	1.34271	2.13788	1.55241	1.13116	2.83316	2.59669	1.56397	2.25492	2.25279	0.782459	2.61818	2.23735	1.07869	2.06965	1.31249	1.02038	2.31916	2.9617	1.84017	2.37655	2.6827	NA	NA
dd_Smed_v6_10143_0_1	1725	-0.0714485	2.52069	0.0186623	0.891339	0.933852	-0.0279025	2.52069	0.00285603	0.95738	0.97884	5.3201	1.96648	7.84417	6.91803	7.66775	3.10093	5.99419	5.94828	7.10404	5.42649	3.45394	7.17901	2.46271	1.05175	3.47721	3.56491	3.53062	1.7702	2.82373	3.11999	6.15193	4.05313	2.99509	5.01983	2.32351	0.869786	3.04185	2.86392	3.41793	1.49662	2.54718	2.55395	7.0167	4.76892	3.15665	5.97779	NA	NA
dd_Smed_v6_10144_0_1	4163	-1.44584	2.11551	5.79992	0.0160269	0.0425828	-1.16822	2.11551	3.86463	0.049314	0.12227	1.70243	4.25185	2.15082	2.21732	2.05386	2.95998	1.29504	6.2014	6.70569	7.52474	5.57193	8.32496	0.326548	0.942289	0.395067	0.473453	0.391865	0.700166	0.25279	1.34783	2.4062	2.32887	2.00209	2.41206	0.30809	0.779262	0.345603	0.380355	0.379358	0.591958	0.228032	1.1033	2.74444	2.74015	2.11008	2.87237	Contig6839	-0.164809
dd_Smed_v6_10145_0_1	1606	-0.0564138	3.58239	0.0185363	0.891704	0.934115	-0.526716	3.58239	1.60505	0.205189	0.371931	12.0021	15.785	10.8806	13.0378	12.3232	2.95998	13.3204	8.69039	16.3991	8.58592	14.9562	13.8525	5.96755	9.068	5.18061	7.2163	6.09465	1.81494	6.73992	4.89604	15.2534	6.88813	13.9303	10.4039	5.63026	7.49913	4.53198	5.79732	5.90012	1.53445	6.07982	4.00778	17.3976	8.10459	14.6817	12.3893	NA	NA
dd_Smed_v6_10146_0_1	911	0.512092	2.79651	0.916438	0.338412	0.494756	0.183973	2.79651	0.118722	0.730425	0.847902	6.299	5.68686	6.95854	14.0578	5.56825	7.42344	11.3964	1.89839	4.04997	4.05178	8.11351	6.94308	5.52123	5.75925	5.8408	13.7168	4.85481	8.02427	10.1655	1.88546	6.64092	5.73044	13.3222	9.19278	5.20916	4.76283	5.10951	11.0196	4.69985	6.78415	9.16994	1.54339	7.57443	6.74244	14.0408	10.9471	Contig4051	-0.109615
dd_Smed_v6_10147_0_1	3640	-0.605623	2.68555	1.54835	0.213379	0.352572	-0.0776081	2.68555	0.0258413	0.872289	0.932258	4.97961	1.59445	6.89528	5.76502	7.57647	5.45012	8.32526	6.37014	5.57701	6.43944	6.97306	10.2798	1.09239	0.404129	1.44852	1.40785	1.65325	1.47443	1.85857	1.58343	2.28873	2.27933	2.86554	3.40641	1.03064	0.33421	1.26716	1.13101	1.60048	1.24656	1.67654	1.29616	2.61045	2.68186	3.02011	4.05647	NA	NA
dd_Smed_v6_10148_0_1	2432	1.32832	1.09652	3.09347	0.0786071	0.160653	0.120628	1.09652	0.0260249	0.871839	0.932084	2.59621	6.21834	2.08756	2.66078	0.775903	1.36253	1.77606	1.94057	0.995894	2.46001	1.0427	0.876311	0.852431	2.35897	0.65637	0.972525	0.253405	0.551698	0.593438	0.721967	0.611708	1.30327	0.641328	0.434618	0.804249	1.95084	0.57419	0.781292	0.245317	0.466435	0.535318	0.590985	0.697696	1.53343	0.675922	0.517559	NA	NA
dd_Smed_v6_1015_0_1	489	-5.88373	5.60508	35.1172	3.1e-09	3.05e-08	-6.23509	5.60508	38.1734	6.47e-10	8.19e-09	4.72425	0	4.80772	0.0443463	2.87541	1.64443	1.96106	1.01247	152.372	99.5581	151.811	162.05	7.71448	0	7.51801	0.0806128	4.67049	3.31151	3.25885	1.87338	465.469	262.318	464.384	399.718	7.27845	0	6.57673	0.0647615	4.52142	2.79973	2.93969	1.5335	530.899	308.644	489.434	475.999	Contig194	-1.94319
dd_Smed_v6_10151_0_1	2117	-0.567364	1.87266	0.497064	0.480793	0.630435	0.573415	1.87266	0.51221	0.474184	0.655396	4.3412	0	2.27734	2.52774	3.28618	5.12123	6.2902	5.52642	3.18686	4.46178	3.87754	2.05596	1.63747	0	0.822583	1.06137	1.23294	2.38217	2.41449	2.36197	2.24873	2.71549	2.73981	1.17141	1.54491	0	0.719592	0.852667	1.19359	2.01401	2.17802	1.93345	2.56483	3.19505	2.88759	1.39495	PL06010B2H12	-0.0290997
dd_Smed_v6_10152_0_1	2441	-4.78093	1.79342	19.4625	1.03e-05	5.67e-05	-3.06064	1.79342	9.5317	0.00201952	0.00794266	0	0	0.126519	1.10866	1.14103	1.92634	0.777024	0.337491	5.87578	9.84004	11.3068	7.95421	0	0	0.0396333	0.403725	0.371281	0.777111	0.258672	0.125097	3.59577	5.19385	6.92876	3.93045	0	0	0.0346711	0.324338	0.359431	0.657011	0.233338	0.102401	4.10123	6.11109	7.3025	4.68052	NA	NA
dd_Smed_v6_10155_0_1	1241	-10.5223	1.32339	52.2556	4.87e-13	7.3e-12	-10.5223	1.32339	54.2306	1.78e-13	3.36e-12	0	0	0	0	0	0	0	0	7.76797	10.6359	3.64945	6.70715	0	0	0	0	0	0	0	0	9.35041	11.0424	4.39886	6.51898	0	0	0	0	0	0	0	0	10.6648	12.9925	4.63614	7.76303	Contig6256	-0.171055
dd_Smed_v6_10156_0_1	6384	-1.64321	4.10412	23.5815	1.2e-06	7.9e-06	-0.905724	4.10412	7.49091	0.00620112	0.0212469	6.85229	8.92889	8.98284	10.6875	18.0283	11.558	9.5833	19.9542	26.7896	34.5125	19.8765	29.5586	0.857089	1.29038	1.07595	1.48812	2.24303	1.78283	1.21985	2.82808	6.26855	6.96536	4.65726	5.58477	0.808644	1.06713	0.94124	1.1955	2.17144	1.5073	1.10038	2.315	7.14972	8.19546	4.90848	6.65054	PL06022A2E12	-0.174843
dd_Smed_v6_10157_0_1	549	-9.05174	0.283711	25.1257	5.37e-07	3.78e-06	-1.73224	0.283711	2.2342	0.134987	0.270138	0	0	0	0	1.50617	0.751741	0.851026	0	2.7885	2.00177	2.41124	3.1682	0	0	0	0	2.17907	1.34839	1.25966	0	7.58741	4.69789	6.56982	6.96071	0	0	0	0	2.10952	1.14	1.13629	0	8.65397	5.52754	6.9242	8.28907	NA	NA
dd_Smed_v6_10158_0_1	552	-5.9448	2.0084	19.5803	9.65e-06	5.36e-05	-6.23185	2.0084	21.1565	4.23e-06	2.91e-05	0	0	0.759114	0	0.365131	0	0.222007	0	9.82616	11.1665	10.5573	14.1558	0	0	1.05158	0	0.52539	0	0.326821	0	26.5913	26.0639	28.6088	30.932	0	0	0.919914	0	0.50862	0	0.294813	0	30.3292	30.6668	30.152	36.835	Contig2875	0.135536
dd_Smed_v6_10159_0_1	1402	0.886745	2.22336	2.4344	0.1187	0.224269	0.53284	2.22336	0.886295	0.346483	0.537229	3.19206	11.2674	2.72016	6.56326	4.88363	4.32251	6.3272	3.03742	2.42334	3.49707	3.87754	3.03338	1.81805	7.41461	1.48361	4.16128	2.76673	3.03604	3.6673	1.96023	2.58203	3.21379	4.13707	2.60971	1.71529	6.13179	1.29785	3.34302	2.67842	2.56683	3.30813	1.6046	2.94499	3.78135	4.36022	3.10774	Contig4127	-0.198697
dd_Smed_v6_1016_0_1	850	0.155871	7.19831	0.353222	0.552295	0.69253	-0.127266	7.19831	0.2355	0.627475	0.777889	136.79	156.893	154.037	200.002	113.008	108.392	154.11	156.765	141.616	141.788	172.111	125.885	128.505	170.293	138.573	209.156	105.6	125.573	147.331	166.871	248.879	214.922	302.882	178.636	121.242	140.831	121.223	168.029	102.229	106.166	132.902	136.596	283.864	252.878	319.219	212.727	Contig3514	-0.317074
dd_Smed_v6_10160_0_1	1194	10.9602	3.87037	288.975	8.32e-65	2.73e-62	10.5503	3.87037	268.891	1.98e-60	6.67e-58	23.7915	27.1056	19.5472	29.2242	11.8211	20.9548	23.0887	19.1526	0	0	0	0.0337043	15.9111	20.9443	12.5185	21.7568	7.86368	17.2821	15.7137	14.5136	0	0	0	0.0340482	15.0118	17.3207	10.9511	17.4786	7.61269	14.6112	14.1747	11.8805	0	0	0	0.0405458	Contig2670	2.29772
dd_Smed_v6_10161_0_1	1230	-0.818019	1.86339	0.984717	0.321037	0.476711	0.0655424	1.86339	0.00645215	0.935979	0.966589	3.95815	0	3.47927	1.8182	3.9708	6.48377	4.07013	2.57337	5.74299	3.37648	4.7899	2.42671	2.56963	0	2.163	1.31399	2.56416	5.19088	2.68897	1.89299	6.97473	3.53688	5.82514	2.37972	2.42439	0	1.89218	1.05561	2.48232	4.38865	2.42561	1.54956	7.95517	4.1615	6.13935	2.83385	Contig3742	-0.489567
dd_Smed_v6_10162_0_1	1185	-1.02666	3.78266	7.77549	0.00529599	0.0163497	-0.571953	3.78266	2.46646	0.1163	0.241158	6.34156	10.4702	12.7152	7.76061	14.8334	12.3567	17.2795	6.53889	14.706	19.2701	18.1821	23.6941	4.27327	8.1517	8.20495	5.82147	9.9425	10.2684	11.8494	4.99271	18.5384	20.952	22.9514	24.1177	4.03174	6.74136	7.17766	4.67676	9.62516	8.68149	10.6889	4.08692	21.1443	24.6522	24.1894	28.7202	NA	NA
dd_Smed_v6_10163_0_1	1688	-2.3431	0.734237	5.30597	0.0212524	0.0540298	0.0271009	0.734237	0.000805469	0.977358	0.987625	0.425608	0	0.253038	0.975619	4.24465	0.657773	1.66505	2.15151	3.48563	1.88118	1.33596	1.85374	0.201335	0	0.114627	0.513763	1.99729	0.383727	0.801564	1.15324	3.08463	1.43588	1.18387	1.32461	0.189956	0	0.100275	0.412739	1.93354	0.324424	0.72306	0.944018	3.51824	1.68946	1.24773	1.57739	NA	NA
dd_Smed_v6_10164_0_1	1537	-0.859773	2.83908	2.62242	0.105363	0.203474	-0.754056	2.83908	2.03118	0.154101	0.299227	4.42632	11.3206	3.54253	2.52774	9.2652	4.46346	6.99322	2.74211	9.82616	8.99592	13.5877	7.17901	2.2996	6.79526	1.76243	1.46189	4.78798	2.85968	3.69731	1.61422	9.55002	7.54105	13.2238	5.63383	2.16962	5.6196	1.54177	1.17443	4.63516	2.41772	3.3352	1.32136	10.8925	8.87282	13.9371	6.70897	Contig6814	0.175647
dd_Smed_v6_10165_0_1	2542	-0.517245	1.64364	0.528482	0.467246	0.618724	-0.95467	1.64364	1.77704	0.182513	0.340214	4.85193	2.28537	3.22623	1.153	1.04975	2.39617	4.36614	0.674982	3.28645	4.02766	3.5517	5.62861	1.52413	0.829456	0.970494	0.403191	0.328007	0.928243	1.39574	0.240252	1.93128	2.04145	2.08999	2.67079	1.43798	0.68595	0.848984	0.323909	0.317538	0.784786	1.25904	0.196665	2.20276	2.40197	2.20273	3.18047	NA	NA
dd_Smed_v6_10167_0_1	2005	1.27288	4.07807	11.8921	0.00056374	0.00218316	1.86112	4.07807	24.7635	6.48e-07	5.2e-06	10.2146	11.0548	27.2016	20.7541	28.1607	21.6126	24.3838	29.8258	10.3573	5.71591	5.50676	7.04419	4.06808	5.08686	10.3741	9.2012	11.1558	10.6148	9.88255	13.4595	7.71661	3.67308	4.10834	4.2377	3.83815	4.20677	9.07526	7.39192	10.7997	8.97429	8.91467	11.0176	8.80133	4.32176	4.32994	5.04641	Contig4564	-0.140489
dd_Smed_v6_10168_0_1	720	-0.571424	1.97527	0.610629	0.434551	0.58994	0.172103	1.97527	0.0561885	0.812625	0.898161	2.12804	0.106296	4.93424	3.94682	4.10772	3.33585	4.99516	6.15921	5.74299	3.32825	4.1708	3.26931	2.3601	0.136207	5.24035	4.87271	4.53149	4.5624	5.63766	7.74004	11.9152	5.95585	8.66505	5.47693	2.2267	0.112641	4.58424	3.91456	4.38685	3.85729	5.08552	6.33582	13.5901	7.00766	9.13245	6.52213	Contig7033	0.120886
dd_Smed_v6_10169_0_1	1908	0.034517	2.27755	0.0021558	0.962967	0.979436	0.205612	2.27755	0.0766533	0.781885	0.879278	3.10694	5.89945	3.54253	5.89806	2.51028	0.187935	8.10325	9.95598	3.718	6.29473	4.75732	3.23561	1.30028	2.85263	1.41974	2.74781	1.045	0.0969948	3.45115	4.72125	2.91089	4.25069	3.72965	2.04546	1.22679	2.35909	1.24198	2.20749	1.01164	0.0820046	3.11315	3.8647	3.32008	5.00137	3.93083	2.43581	Contig6483	-0.533452
dd_Smed_v6_1017_0_1	445	3.34989	1.73424	7.81939	0.00516888	0.0159911	3.08151	1.73424	6.76969	0.0092719	0.0300433	5.36266	0	1.89778	12.9935	2.28207	4.98028	3.99612	5.5686	0.232375	0.820003	0.912363	0	9.62284	0	3.26107	25.955	4.07325	11.0208	7.29729	11.3224	0.780054	2.37419	3.06684	0	9.07894	0	2.85277	20.8513	3.94324	9.31757	6.5826	9.26822	0.889706	2.79348	3.23227	0	NA	NA
dd_Smed_v6_10170_0_1	1748	2.82606	4.17184	67.7917	1.82e-16	3.83e-15	2.6461	4.17184	60.2639	8.3e-15	1.75e-13	26.3451	38.3198	24.4182	17.4281	21.634	23.5389	23.0887	25.7337	3.18686	4.34119	4.72473	2.73005	12.0349	20.2253	10.6818	8.86266	9.83032	13.2606	10.7335	13.3202	2.72343	3.19984	4.04315	1.88383	11.3546	16.7261	9.34439	7.11995	9.51655	11.2112	9.68227	10.9036	3.10626	3.76494	4.26124	2.24333	NA	NA
dd_Smed_v6_10171_0_1	2487	-1.56382	0.453502	1.27774	0.25832	0.406674	-0.884346	0.453502	0.423576	0.515158	0.691499	1.87267	0	0.885633	0	0	2.16126	0.925029	1.34996	2.02498	1.66412	1.98765	2.52782	0.60127	0	0.272302	0	0	0.855754	0.302247	0.491131	1.2163	0.862125	1.1955	1.22598	0.567285	0	0.238208	0	0	0.7235	0.272645	0.402028	1.38727	1.01438	1.25998	1.45994	NA	NA
dd_Smed_v6_10173_0_1	1107	-8.21452	-0.786332	18.0725	2.13e-05	0.000109204	-8.21452	-0.786332	18.8785	1.39e-05	8.66e-05	0	0	0	0	0	0	0	0	1.72622	1.13353	1.85731	1.07854	0	0	0	0	0	0	0	0	2.32939	1.31931	2.5097	1.17517	0	0	0	0	0	0	0	0	2.65683	1.5523	2.64507	1.39943	Contig4688	0.14671
dd_Smed_v6_10174_0_1	535	-6.27448	1.41434	29.2338	6.42e-08	5.21e-07	-3.53746	1.41434	12.8107	0.000344634	0.00161164	0.170243	0	0.126519	0.0443463	0.730262	1.26856	0.407013	0	5.34463	7.04238	5.6371	10.0102	0.254097	0	0.180832	0.0736816	1.08417	2.33495	0.618211	0	14.9231	16.96	15.7611	22.5684	0.239735	0	0.158191	0.0591932	1.04956	1.97409	0.557664	0	17.0208	19.9552	16.6112	26.8753	NA	NA
dd_Smed_v6_10175_0_1	1185	-1.644	2.04768	6.11536	0.0134012	0.0364167	-0.884673	2.04768	1.85505	0.173197	0.326838	2.89413	2.55111	2.27734	0.620849	2.69284	4.88632	4.47714	2.06713	5.37783	8.58592	10.1337	1.98855	1.95022	1.9862	1.46954	0.465718	1.80495	4.06052	3.07019	1.57834	6.77928	9.33531	12.7919	2.0241	1.83999	1.64257	1.28555	0.374141	1.74734	3.43298	2.7695	1.29199	7.73223	10.9839	13.4819	2.41037	PL03018B2D04	-0.0563222
dd_Smed_v6_10176_0_1	6651	-4.27096	0.612803	10.1058	0.001478	0.00526725	-2.14721	0.612803	3.15348	0.0757653	0.173087	0.425608	0	0.253038	0	1.04975	0	0.62902	1.34996	3.68481	3.47296	2.02023	4.31415	0.0510982	0	0.0290918	0	0.125364	0	0.0768528	0.183648	0.827604	0.672779	0.454358	0.782386	0.04821	0	0.0254494	0	0.121362	0	0.069326	0.15033	0.94394	0.791593	0.478867	0.931694	NA	NA
dd_Smed_v6_10179_0_1	798	0.907086	0.700818	0.383473	0.53575	0.678214	0.63379	0.700818	0.18877	0.663942	0.803142	1.48963	4.09241	2.3406	0	2.41899	4.13457	0	0	0.929501	1.44706	1.56405	0.269634	1.49059	4.73139	2.24283	0	2.40771	5.10207	0	0	1.73997	2.33639	2.93179	0.407554	1.40634	3.9128	1.96202	0	2.33086	4.31357	0	0	1.98456	2.749	3.08993	0.48533	NA	NA
dd_Smed_v6_1018_0_1	1646	0.728083	7.05528	6.23932	0.0124944	0.034186	0.790494	7.05528	7.34478	0.00672579	0.0228177	155.602	100.982	223.432	122.44	163.761	116.943	173.72	174.567	82.792	75.6091	101.663	103.607	75.4865	56.601	103.798	66.1225	79.0229	69.962	85.7637	95.9586	75.1369	59.184	92.3886	75.9228	71.2198	46.8084	90.8021	53.1205	76.5007	59.1496	77.3642	78.5494	85.6988	69.6361	97.3721	90.4116	Contig210	1.09276
dd_Smed_v6_10180_0_1	1703	-0.391616	2.16093	0.445597	0.504433	0.651868	-0.34199	2.16093	0.341107	0.559191	0.725619	2.51109	2.60426	4.23838	6.38587	7.21134	4.27553	3.55211	1.26559	5.11226	4.14825	5.57193	5.83084	1.17742	1.41085	1.90309	3.3332	3.36336	2.47226	1.69494	0.672403	4.48428	3.13842	4.89413	4.12981	1.11087	1.16676	1.66481	2.67777	3.25601	2.09018	1.52894	0.550413	5.11463	3.69267	5.15812	4.91792	NA	NA
dd_Smed_v6_10181_0_1	492	-0.775333	0.916383	0.448571	0.503014	0.65061	0.00793418	0.916383	4.79e-05	0.994479	0.997124	1.70243	0	2.0243	1.153	1.91694	0	3.70012	2.7843	3.05408	2.62883	1.53147	1.14595	2.76304	0	3.14618	2.08315	3.09467	0	6.11129	5.12038	9.27277	6.88428	4.65615	2.80939	2.60687	0	2.75226	1.67353	2.9959	0	5.51276	4.19142	10.5762	8.10005	4.9073	3.34552	NA	NA
dd_Smed_v6_10182_0_1	1006	1.89942	2.98133	10.2219	0.00138784	0.00497426	2.15291	2.98133	12.9432	0.000321086	0.0015123	15.024	1.38185	13.3477	8.4258	8.99135	11.2761	17.3535	7.88885	2.48974	2.50825	4.00788	1.21335	11.9253	1.26729	10.1457	7.44507	7.09903	11.0377	14.0176	7.09523	3.697	3.21242	5.95938	1.4548	11.2513	1.04803	8.87543	5.9811	6.87244	9.3319	12.6447	5.80799	4.21669	3.77974	6.28083	1.73243	Contig4671	0.0709514
dd_Smed_v6_10183_0_1	1400	0.117376	3.27888	0.0954553	0.757353	0.847233	-0.0148581	3.27888	0.00153203	0.968778	0.984669	5.57546	10.0982	10.3746	14.723	7.57647	11.1821	7.47423	10.9685	8.29912	9.98475	9.51464	9.77424	3.18007	6.65466	5.66649	9.34809	4.29844	7.86531	4.33832	7.08873	8.8552	9.18902	10.166	8.42109	3.00032	5.50333	4.95702	7.50992	4.16124	6.64976	3.91343	5.80267	10.1	10.8118	10.7143	10.0281	Contig6416	-0.227711
dd_Smed_v6_10184_0_1	2698	-2.63718	0.843016	8.30133	0.0039616	0.012674	-1.3934	0.843016	2.58227	0.108066	0.228703	0.468169	0.956667	0.569335	0.133039	1.23232	0.281903	1.70205	1.81401	4.7139	3.88296	1.4663	3.20191	0.138562	0.327138	0.161361	0.0438321	0.362788	0.102891	0.512642	0.608345	2.60995	1.8543	0.812951	1.43146	0.13073	0.270539	0.141158	0.0352131	0.351208	0.0869893	0.462434	0.497976	2.97683	2.18178	0.856802	1.70464	NA	NA
dd_Smed_v6_10185_0_1	2642	0.425915	1.83133	0.192797	0.660599	0.777635	0.466449	1.83133	0.231424	0.63047	0.779982	2.42596	11.9583	0.695854	0	4.29029	2.81903	4.21813	4.17645	3.61842	3.15942	1.30338	3.1345	0.733221	4.1759	0.201399	0	1.28981	1.05072	1.29739	1.43029	2.04588	1.54076	0.73794	1.43103	0.691778	3.45342	0.176183	0	1.24864	0.888332	1.17032	1.17081	2.33347	1.81286	0.777745	1.70412	Contig4436	0.219868
dd_Smed_v6_10186_0_1	2457	0.0363993	0.00259036	0.00112231	0.973275	0.986188	0.0327	0.00259036	0.0009044	0.976009	0.987495	1.83011	0	0.316297	1.55212	0.821545	1.31555	0.814025	0.759355	0.630733	1.47118	0.944947	0.572973	0.59478	0	0.0984381	0.561534	0.265582	0.527254	0.269225	0.279634	0.383473	0.771474	0.57529	0.281282	0.561161	0	0.0861132	0.451116	0.257105	0.445769	0.242858	0.228902	0.437378	0.907718	0.606321	0.334961	NA	NA
dd_Smed_v6_10187_0_1	1639	-10.2134	1.15214	25.6681	4.05e-07	2.9e-06	-3.35504	1.15214	6.00398	0.0142736	0.0435132	0	0	0	0	0.0912827	0	2.14607	0	7.76797	4.79943	5.8326	4.81971	0	0	0	0	0.0442366	0	1.06401	0	7.07984	3.77286	5.32314	3.54695	0	0	0	0	0.0428247	0	0.959805	0	8.07505	4.43916	5.61027	4.22384	NA	NA
dd_Smed_v6_10189_0_1	3117	-1.08245	3.07719	6.31645	0.0119623	0.0329495	-0.967838	3.07719	5.09816	0.0239513	0.0675884	2.89413	5.68686	6.19943	9.091	3.83387	5.2152	7.65924	9.11226	12.1167	13.6506	12.3495	12.4369	0.741421	1.68325	1.52085	2.59257	0.976952	1.64761	1.99679	2.64509	5.80688	5.64256	5.92647	4.81269	0.699514	1.39202	1.33044	2.08278	0.945769	1.39297	1.80122	2.16521	6.62315	6.63905	6.24615	5.73112	NA	NA
dd_Smed_v6_1019_0_1	1373	1.58993	7.24766	28.5907	8.94e-08	7.06e-07	0.838511	7.24766	8.22127	0.00414023	0.0149782	191.651	255.377	258.668	240.668	148.791	131.884	129.504	151.955	53.3799	89.4768	55.1654	116.313	111.461	171.602	144.06	155.812	86.0751	94.5886	76.647	100.137	58.0767	83.9654	60.1008	102.182	105.161	141.913	126.024	125.174	83.3278	79.9703	69.1403	81.9701	66.2405	98.7938	63.3427	121.682	Contig4519	-0.233035
dd_Smed_v6_10191_0_1	2051	-5.54065	1.00017	12.3272	0.000446415	0.00176736	-3.34664	1.00017	5.72701	0.0167059	0.0498407	0	0	0.442816	0	0.0456414	0	0.33301	1.60308	5.07906	6.07767	3.38878	5.83084	0	0	0.165094	0	0.0176752	0	0.131939	0.707198	3.69924	3.81796	2.4715	3.42909	0	0	0.144423	0	0.0171111	0	0.119018	0.578896	4.21924	4.49222	2.60482	4.08348	NA	NA
dd_Smed_v6_10192_0_1	2784	-2.92489	1.54125	5.01136	0.0251816	0.0625066	-4.67827	1.54125	10.8097	0.00100967	0.00424281	0.0851216	2.23222	0	1.46343	0	1.03364	0	0.0843728	10.9548	5.61943	6.09328	6.20159	0.0244148	0.739742	0	0.467259	0	0.365612	0	0.027421	5.87802	2.60066	3.27391	2.68687	0.0230348	0.611758	0	0.375379	0	0.309108	0	0.0224462	6.70429	3.05994	3.4505	3.19962	NA	NA
dd_Smed_v6_10193_0_1	2060	0.300972	1.91861	0.118213	0.73098	0.828822	0.00149914	1.91861	2.94e-06	0.998633	0.99939	4.89449	9.14149	2.90994	0	3.01233	2.81903	3.3301	4.59831	4.81349	4.53414	2.54158	1.85374	1.89725	4.09413	1.08016	0	1.16147	1.34757	1.31363	2.01968	3.4905	2.83588	1.84553	1.08541	1.79001	3.3858	0.944921	0	1.1244	1.13931	1.18498	1.65326	3.98115	3.3367	1.94508	1.29255	NA	NA
dd_Smed_v6_10194_0_1	1696	-4.05266	1.76055	7.9678	0.00476168	0.0149247	-5.81188	1.76055	13.7188	0.000212316	0.00103487	1.48963	0	0.695854	0	0.638979	0	0	0	9.4278	6.15003	9.77531	11.2909	0.70135	0	0.313737	0	0.299249	0	0	0	8.30384	4.67209	8.62163	8.03003	0.661709	0	0.274455	0	0.289698	0	0	0	9.47111	5.49719	9.08668	9.56245	NA	NA
dd_Smed_v6_10195_0_1	793	-1.25866	0.961578	2.18826	0.139066	0.253507	-1.45458	0.961578	2.89287	0.0889722	0.197522	3.23462	0.690926	0.885633	0.399117	0.912827	2.25522	0.518016	0.885914	2.12457	3.23178	2.86743	4.31415	3.25712	0.803842	0.853991	0.447386	0.914297	2.8005	0.530827	1.01081	4.00215	5.25084	5.40883	6.56198	3.07302	0.664768	0.747067	0.359414	0.885115	2.36769	0.478838	0.827425	4.56473	6.17814	5.70058	7.81424	NA	NA
dd_Smed_v6_10196_0_1	535	0.604086	2.4343	1.61099	0.204353	0.340819	0.479112	2.4343	1.01666	0.313313	0.503016	7.27789	2.92315	5.56683	9.04665	5.43132	6.24885	5.03216	6.07484	4.04997	3.64178	4.20338	4.44896	10.8626	5.04092	7.95659	15.0311	8.0635	11.5018	7.64334	10.2738	11.3082	8.77041	11.7525	10.0304	10.2487	4.16878	6.96039	12.0754	7.80613	9.72422	6.89476	8.4099	12.8978	10.3193	12.3864	11.9446	NA	NA
dd_Smed_v6_10198_0_1	1933	0.843052	0.71377	0.620626	0.430815	0.58656	0.526581	0.71377	0.244324	0.6211	0.773277	1.14914	4.25185	2.59364	0	2.73848	0.37587	1.51705	1.77183	1.59343	1.13353	1.17304	0.539268	0.474706	2.02936	1.02601	0	1.12525	0.191481	0.637749	0.829355	1.23139	0.755549	0.907746	0.336501	0.447875	1.67825	0.897547	0	1.08934	0.161888	0.575289	0.678891	1.40449	0.888981	0.956711	0.400718	PL06015B1F03	0.229107
dd_Smed_v6_102_0_1	893	0.781728	7.21122	7.46204	0.00630136	0.018985	0.45957	7.21122	2.59904	0.106929	0.226973	182.373	151.791	243.992	168.161	160.658	103.176	161.695	171.361	91.2903	82.6756	122.485	137.648	163.077	156.822	208.928	167.39	142.897	113.775	147.139	173.625	152.71	119.285	205.17	185.923	153.859	129.69	182.769	134.475	138.336	96.1917	132.728	142.125	174.176	140.351	216.237	221.404	NA	NA
dd_Smed_v6_1020_0_1	1786	1.90464	7.84876	46.8947	7.49e-12	9.95e-11	1.76752	7.84876	40.7414	1.74e-10	2.36e-09	287.2	302.785	271.573	409.051	219.17	294.025	274.216	368.034	85.3813	72.4256	95.0486	86.5189	128.406	156.41	116.273	203.587	97.4701	162.114	124.765	186.448	71.4128	52.2481	79.6065	58.4309	121.149	129.349	101.715	163.555	94.359	137.06	112.546	152.622	81.4513	61.4753	83.9006	69.5816	Contig6368	0.222103
dd_Smed_v6_10201_0_1	2274	-1.46353	0.522762	1.34842	0.245555	0.392124	-0.0531835	0.522762	0.00187461	0.965465	0.983204	0.340486	0	0.759114	1.41908	1.64309	2.39617	0	2.69993	1.82581	2.07413	0.391013	2.69634	0.119562	0	0.255264	0.554718	0.573908	1.03764	0	1.07427	1.19939	1.17518	0.257208	1.4302	0.112804	0	0.223304	0.445641	0.555591	0.877276	0	0.87937	1.36798	1.38272	0.271082	1.70314	NA	NA
dd_Smed_v6_10203_0_1	1926	0.00694588	1.89387	0.000132479	0.990817	0.995896	-0.490598	1.89387	0.655773	0.418056	0.605574	2.00036	4.73019	2.84668	6.56326	3.10361	1.40951	2.73809	4.17645	3.85079	3.32825	2.93259	5.96566	0.829343	2.26587	1.1302	3.02913	1.27992	0.720663	1.15524	1.96201	2.98668	2.22648	2.27761	3.73607	0.782467	1.87384	0.988692	2.4335	1.23907	0.609287	1.0421	1.60606	3.40651	2.61969	2.40047	4.44905	NA	NA
dd_Smed_v6_10205_0_1	2706	0.767716	3.62008	3.08439	0.079047	0.161412	0.829312	3.62008	3.59719	0.0578774	0.139214	15.024	7.54704	7.08506	26.0313	8.39801	15.1288	14.8745	19.7854	11.2868	8.32062	6.15845	6.97678	4.43343	2.57313	2.00211	8.55113	2.46502	5.50548	4.4668	6.61558	6.23071	3.96176	3.4043	3.10986	4.18284	2.12794	1.75144	6.86967	2.38634	4.65463	4.02932	5.41536	7.10656	4.66142	3.58793	3.70333	NA	NA
dd_Smed_v6_10206_0_1	1160	0.62965	3.48925	2.73883	0.0979361	0.191731	0.423592	3.48925	1.24526	0.264459	0.44773	9.10801	9.46038	18.9778	15.743	14.0119	12.4507	9.5833	10.1247	7.03765	5.5712	12.3495	9.4709	6.26973	7.52424	12.5101	12.0638	9.59425	10.5695	6.71336	7.89726	9.06284	6.18801	15.9248	9.84797	5.91535	6.22245	10.9438	9.69161	9.28802	8.93603	6.05586	6.46451	10.3368	7.28082	16.7838	11.7273	Contig4036	0.357903
dd_Smed_v6_10207_0_1	1601	0.862453	2.15286	0.934172	0.333781	0.490293	1.62049	2.15286	3.19703	0.0737723	0.16933	6.89485	0	4.04861	5.23287	2.92105	14.6589	6.4012	3.4171	1.8922	2.87001	3.42136	0.70779	3.43888	0	1.93369	2.90538	1.44917	9.01634	3.24902	1.93115	1.76551	2.30968	3.19663	0.533244	3.2445	0	1.69158	2.33408	1.40292	7.6229	2.93082	1.5808	2.01369	2.71758	3.36905	0.635007	Contig3555	0.0373602
dd_Smed_v6_10208_0_1	1999	-0.142974	1.27424	0.0361731	0.849158	0.906137	0.859783	1.27424	1.3083	0.252703	0.433357	2.29828	1.80704	1.07541	1.64081	2.6472	7.18852	2.96009	0.9281	1.29466	1.18177	2.28091	2.79745	0.918066	0.834001	0.411372	0.729629	1.05183	3.54116	1.2033	0.420081	0.967472	0.761693	1.70679	1.68797	0.866175	0.689709	0.359866	0.586158	1.01826	2.99389	1.08545	0.343868	1.10347	0.89621	1.79885	2.01009	Contig5734	0.246582
dd_Smed_v6_10209_0_1	1362	0.723855	3.21309	3.42277	0.0643029	0.136996	0.633436	3.21309	2.63202	0.104729	0.223621	8.55472	5.74	16.2577	12.8604	10.0867	11.464	9.95331	9.23882	5.24504	6.89768	7.26632	6.84197	5.01547	3.88819	9.12755	8.39332	5.88228	8.28857	5.93845	6.13748	5.75263	6.52508	7.98034	6.05923	4.73199	3.21548	7.98474	6.7429	5.69453	7.0076	5.35685	5.024	6.56127	7.67742	8.41081	7.21555	NA	NA
dd_Smed_v6_1021_0_1	1169	-0.828533	5.37692	8.41781	0.00371563	0.0119499	-0.632285	5.37692	4.94173	0.0262158	0.0728364	30.9417	47.7802	24.6712	23.5036	44.9111	35.5667	36.4831	28.4336	54.0771	57.2796	61.389	52.6124	21.1355	37.7091	16.1379	17.872	30.5148	29.9605	25.3606	22.0074	69.1024	63.1315	78.5525	54.2858	19.9409	31.1849	14.1174	14.3578	29.5409	25.3302	22.8769	18.0147	78.8161	74.2806	82.7897	64.6455	Contig2104	-1.92877
dd_Smed_v6_10210_0_1	2597	0.514294	1.09566	0.281406	0.595781	0.727949	0.911751	1.09566	0.879603	0.348311	0.538997	1.27682	4.73019	2.21408	0	3.60567	2.86601	2.40507	1.94057	0.663929	1.37471	2.15057	1.5504	0.392593	1.68042	0.65192	0	1.10277	1.08674	0.752557	0.676097	0.381896	0.682024	1.2387	0.720086	0.370402	1.38969	0.570297	0	1.06757	0.918787	0.678853	0.553437	0.435578	0.802471	1.30552	0.857504	NA	NA
dd_Smed_v6_10211_0_1	1052	0.452356	3.97574	2.16928	0.140793	0.256015	0.691873	3.97574	5.07359	0.0242931	0.0683767	16.6413	11.852	17.9024	18.1377	25.9699	16.9142	19.0186	14.3012	10.5897	12.7101	11.0135	12.8413	12.6315	10.3942	13.0127	15.3257	19.6077	15.8327	14.6908	12.3001	15.037	15.5665	15.6601	14.7234	11.9175	8.59585	11.3835	12.3121	18.9819	13.3858	13.252	10.0685	17.1508	18.3156	16.5048	17.5331	Contig441	0.451766
dd_Smed_v6_10212_0_1	767	-4.93852	2.92245	37.7786	7.92e-10	8.25e-09	-3.47502	2.92245	21.908	2.86e-06	2.04e-05	0.340486	1.96648	0.253038	0.0443463	2.82976	0.469838	1.55405	2.32025	15.3368	19.2218	21.636	23.7952	0.354476	2.36541	0.252268	0.0513946	2.9304	0.603214	1.64646	2.7371	29.8699	32.2894	42.1955	37.4203	0.334441	1.95617	0.220683	0.0412886	2.83687	0.50999	1.48521	2.24052	34.0686	37.9918	44.4716	44.5615	Contig2193	0.0404246
dd_Smed_v6_10214_0_1	5901	-8.22015	1.90074	78.6968	7.24e-19	1.89e-17	-2.4086	1.90074	14.8668	0.000115376	0.000595749	0	0	0.126519	0	1.59745	1.22158	2.40507	1.64527	8.69748	10.3224	8.92812	8.662	0	0	0.0163947	0	0.215017	0.203852	0.331196	0.252268	2.20172	2.2538	2.26318	1.77054	0	0	0.014342	0	0.208154	0.172347	0.29876	0.206501	2.51122	2.65182	2.38526	2.10842	PL06010B1F09	0.0379835
dd_Smed_v6_10215_0_1	1040	-1.91356	0.0301986	1.71102	0.190853	0.323973	-0.544751	0.0301986	0.149605	0.698913	0.826813	0.510729	0	1.01215	0	0.547696	2.0203	1.36904	0	0.896305	3.06295	0.977531	0.808903	0.39214	0	0.744192	0	0.418291	1.91294	1.06971	0	1.28741	3.79461	1.40599	0.938158	0.369975	0	0.651016	0	0.40494	1.6173	0.964945	0	1.46838	4.46475	1.48183	1.11719	NA	NA
dd_Smed_v6_10216_0_1	1034	-2.99807	2.27287	14.4709	0.000142345	0.000624738	-3.84722	2.27287	21.9802	2.75e-06	1.97e-05	2.29828	2.01963	0.632595	0.975619	0.684621	0.892692	1.70205	0	7.13724	11.8659	12.0236	16.5825	1.77487	1.80204	0.467819	0.838716	0.525898	0.850159	1.33763	0	10.3111	14.7857	17.394	19.3438	1.67455	1.49026	0.409246	0.673795	0.509112	0.71877	1.20662	0	11.7605	17.3969	18.3322	23.0353	Contig5033	-0.759718
dd_Smed_v6_10217_0_1	1997	-2.04943	1.28392	6.17017	0.0129922	0.0354004	-2.709	1.28392	10.2275	0.00138363	0.00563577	1.9578	0.372037	2.27734	0.266078	1.04975	0.939676	0.370012	0.717168	6.90487	5.78826	3.03035	4.44896	0.782839	0.171878	0.872012	0.118437	0.417523	0.46336	0.150564	0.324933	5.16502	3.73448	2.26986	2.68716	0.738591	0.142141	0.762833	0.0951478	0.404197	0.39175	0.135818	0.265983	5.89106	4.394	2.3923	3.19997	PL05004A1B04	-0.174907
dd_Smed_v6_10218_0_1	2017	-1.27708	3.27666	10.1484	0.00144425	0.00515675	-0.445387	3.27666	1.28432	0.257097	0.438714	4.68169	8.02537	3.47927	5.94241	14.8334	8.92692	8.80627	6.87638	11.3864	12.7101	12.3169	17.2903	1.85344	3.67089	1.31903	2.61886	5.84128	4.35828	3.54788	3.08464	8.43286	8.11898	9.13439	10.3397	1.74868	3.03578	1.15388	2.1039	5.65484	3.68472	3.20041	2.52502	9.61826	9.55281	9.62711	12.3129	NA	NA
dd_Smed_v6_10219_0_1	974	-5.64411	0.919368	15.0413	0.000105186	0.000474003	-7.08534	0.919368	20.0961	7.36e-06	4.85e-05	0.383047	0	0	0	0	0.140951	0	0	5.21185	4.53414	3.25844	7.95421	0.314034	0	0	0	0	0.142505	0	0	7.99332	5.99785	5.0042	9.85034	0.296284	0	0	0	0	0.120481	0	0	9.11694	7.05709	5.27413	11.7301	NA	NA
dd_Smed_v6_1022_0_1	736	6.99577	8.48647	290.789	3.35e-65	1.19e-62	6.71158	8.48647	274.47	1.2e-61	4.39e-59	522.987	516.016	594.006	719.697	367.732	559.107	497.702	507.502	2.42334	5.64355	6.54946	3.77488	567.409	646.84	617.143	869.214	396.85	748.06	549.509	623.894	4.91849	9.8795	13.311	6.18641	535.338	534.929	539.874	698.296	384.183	632.45	495.691	510.705	5.60988	11.6242	14.029	7.367	Contig6766	3.28115
dd_Smed_v6_10220_0_1	1398	-0.0104568	3.44744	0.000577112	0.980834	0.989987	-0.450283	3.44744	1.06442	0.302209	0.490464	8.29935	23.5978	7.08506	8.38146	9.58469	10.7123	10.4343	4.17645	10.7889	12.8065	13.718	10.3809	4.74046	15.5731	3.87533	5.32927	5.44556	7.54562	6.06513	2.70303	11.5282	11.8028	14.6781	8.95657	4.47252	12.8788	3.39013	4.28134	5.27175	6.37947	5.47112	2.21264	13.1487	13.8872	15.4698	10.6658	NA	NA
dd_Smed_v6_10221_0_1	2567	-1.8799	1.60803	7.79531	0.00523821	0.0161904	-1.20253	1.60803	3.3518	0.0671315	0.156827	2.97925	0.956667	0.885633	0.798234	2.00822	1.64443	3.1451	2.23588	3.91718	6.31885	4.52923	6.06677	0.926755	0.343833	0.263816	0.276414	0.62138	0.630825	0.995614	0.788085	2.27952	3.17156	2.63926	2.85066	0.874373	0.284346	0.230785	0.222061	0.601547	0.533334	0.898105	0.645108	2.59995	3.73166	2.78163	3.39466	NA	NA
dd_Smed_v6_10222_0_1	1243	-0.430613	2.00374	0.407169	0.52341	0.668174	-0.472481	2.00374	0.491407	0.4833	0.663805	2.34084	7.75963	2.3406	1.77385	1.27796	1.83237	6.3642	4.30301	2.8549	4.00355	7.03823	5.25787	1.50378	5.75947	1.43989	1.26853	0.816615	1.45165	4.16059	3.13222	3.43095	4.14986	8.46986	5.10213	1.41878	4.76301	1.25961	1.01909	0.790551	1.2273	3.75311	2.56396	3.91323	4.88274	8.92673	6.0758	Contig7044	0.246039
dd_Smed_v6_10223_0_1	1357	-0.592445	3.81752	0.841107	0.35908	0.515562	-0.80387	3.81752	1.54034	0.214567	0.384576	10.8104	0.318889	20.4961	18.2707	11.1365	4.04061	11.9514	15.9464	18.6232	18.9324	17.8888	19.7844	6.36131	0.216806	11.5495	11.9682	6.51839	2.93215	7.15683	10.6325	20.5007	17.9757	19.7191	17.5856	6.00176	0.179296	10.1035	9.61486	6.31034	2.47899	6.4559	8.70351	23.3825	21.1503	20.7827	20.9415	NA	NA
dd_Smed_v6_10225_0_1	2111	-1.19595	2.27548	3.57627	0.0586107	0.126463	-1.01048	2.27548	2.5859	0.107819	0.228364	3.06438	5.58056	2.78342	1.46343	4.7467	0.610789	3.88512	5.39986	7.83437	6.6565	9.3843	5.66232	1.15914	2.43894	1.00824	0.616224	1.78598	0.284919	1.49554	2.31443	5.54384	4.06273	6.64964	3.23534	1.09363	2.01698	0.882002	0.495052	1.72897	0.240886	1.34907	1.89454	6.32313	4.78021	7.00832	3.85275	PL06010A1G12	-0.0409931
dd_Smed_v6_10226_0_1	899	3.3089	2.38586	18.4219	1.77e-05	9.27e-05	4.14369	2.38586	26.9628	2.07e-07	1.82e-06	6.17131	2.9763	2.6569	9.62316	1.46052	19.5453	13.0614	4.21864	0.232375	0.74765	0.553934	0.606677	5.48152	3.05442	2.25989	9.51509	1.29039	21.4092	11.8063	4.24584	0.386122	1.07152	0.921686	0.813975	5.17169	2.52597	1.97694	7.64409	1.2492	18.1005	10.65	3.47554	0.440399	1.26075	0.971402	0.969311	NA	NA
dd_Smed_v6_10227_1_1	482	-0.460074	2.51677	1.00559	0.315961	0.471376	-0.709275	2.51677	2.37851	0.123015	0.252171	5.57546	3.72037	7.46462	4.3016	3.60567	5.59107	3.40411	5.10455	6.30733	7.59709	5.6371	9.40349	9.2367	7.12117	11.8422	7.933	5.9417	11.4227	5.73903	9.58212	19.5476	20.3077	17.4942	23.5318	8.71463	5.88912	10.3595	6.37309	5.75205	9.65732	5.17696	7.84369	22.2954	23.8941	18.4378	28.0225	NA	NA
dd_Smed_v6_10228_0_1	2896	-3.32733	0.393115	5.85247	0.0155552	0.0414636	-1.07712	0.393115	0.730396	0.392755	0.582995	0.893776	0	0	0	0.410772	1.31555	2.22007	0.46405	3.68481	2.3153	1.98765	1.34817	0.246441	0	0	0	0.112661	0.447328	0.622946	0.144983	1.90069	1.03008	1.02666	0.561513	0.232512	0	0	0	0.109065	0.378195	0.561936	0.11868	2.16787	1.21199	1.08203	0.66867	NA	NA
dd_Smed_v6_10229_0_1	2856	0.32289	0.316755	0.0899939	0.764185	0.851501	0.571007	0.316755	0.28123	0.595896	0.753822	2.76645	0	0.569335	1.33039	0.912827	0.798725	2.33107	1.51871	1.62663	0.651179	0.488766	0.977424	0.773478	0	0.152434	0.414072	0.253865	0.275396	0.663255	0.481135	0.850794	0.293767	0.255992	0.412798	0.729759	0	0.133349	0.332651	0.245762	0.232835	0.598296	0.393846	0.97039	0.345646	0.269801	0.491575	NA	NA
dd_Smed_v6_1023_0_1	937	0.927546	7.06112	9.83182	0.00171518	0.00601299	0.766023	7.06112	6.7415	0.00941955	0.0304093	187.225	156.893	129.998	187.718	99.4525	175.907	167.578	148.834	85.7133	89.4768	118.216	54.5672	159.554	154.482	106.089	178.083	84.304	184.869	145.332	143.718	136.648	123.036	188.722	70.2434	150.535	127.755	92.8062	143.065	81.6132	156.298	131.098	117.644	155.856	144.764	198.901	83.6484	Contig6336	0.259246
dd_Smed_v6_10232_0_1	1317	-0.0431941	2.92833	0.00790492	0.929154	0.957584	-0.0473219	2.92833	0.00951053	0.922312	0.959805	7.23533	5.15537	10.1215	7.36149	10.817	4.22854	3.2191	11.5169	4.41513	6.99415	9.44947	9.90906	4.38688	3.61149	5.87669	4.96861	6.52369	3.16172	1.98624	7.91225	5.00786	6.84241	10.7326	9.07528	4.13893	2.98666	5.1409	3.99161	6.31547	2.67309	1.79171	6.47678	5.71181	8.05079	11.3116	10.8072	NA	NA
dd_Smed_v6_10233_0_1	2665	-0.348139	2.0195	0.368526	0.543809	0.684962	-0.703831	2.0195	1.49628	0.221245	0.393332	3.31974	5.36797	5.3138	1.64081	2.32771	2.67808	4.47714	2.69993	5.21185	6.92179	4.56181	3.1682	0.994696	1.85834	1.52469	0.54729	0.693751	0.989566	1.36517	0.916655	2.92139	3.34643	2.5605	1.43393	0.938473	1.53682	1.33379	0.439673	0.671608	0.836632	1.23147	0.750352	3.33204	3.93741	2.69861	1.70758	PL08006B2C08	-0.0423355
dd_Smed_v6_10235_0_1	1933	1.54647	2.26289	8.22462	0.00413258	0.0131474	1.47374	2.26289	7.50409	0.0061559	0.0211243	4.42632	6.43093	3.66905	10.1997	6.84621	5.96694	5.66118	5.06237	1.8922	1.83295	3.35619	1.38188	1.8285	3.0694	1.45142	4.69039	2.81313	3.03976	2.37989	2.36959	1.46228	1.22174	2.59716	0.862284	1.72515	2.53836	1.2697	3.76809	2.72334	2.56997	2.14681	1.93969	1.66783	1.4375	2.73726	1.02684	Contig5704	0.163696
dd_Smed_v6_10236_0_1	2525	-5.96184	0.792418	22.8063	1.79e-06	1.15e-05	-1.85704	0.792418	3.54699	0.0596534	0.142474	0	0	0.253038	0	1.41488	1.78538	0.481015	0.506237	3.22006	5.23355	2.15057	4.58378	0	0	0.0766296	0	0.445073	0.696289	0.154803	0.181402	1.90501	2.67052	1.27402	2.18966	0	0	0.0670353	0	0.430867	0.58868	0.139642	0.148492	2.17279	3.14213	1.34274	2.60752	NA	NA
dd_Smed_v6_10238_0_1	2141	-0.481236	2.59211	0.871274	0.350603	0.506727	-1.13473	2.59211	4.73507	0.0295536	0.0803916	4.00071	8.8226	7.3381	3.41467	4.42721	1.4565	3.95912	5.10455	5.97536	6.43944	9.77531	10.6843	1.49212	3.80182	2.62083	1.41771	1.64243	0.669903	1.50267	2.15721	4.1691	3.87518	6.82965	6.01923	1.40778	3.14406	2.2927	1.13894	1.59	0.566372	1.35551	1.76584	4.75515	4.55954	7.19804	7.16791	NA	NA
dd_Smed_v6_10239_0_1	630	-4.11052	1.30258	7.08037	0.00779329	0.0227293	-3.60421	1.30258	5.73361	0.0166433	0.0496651	0.978898	0	0.442816	0	0.0912827	0	0	1.94057	5.01267	7.64533	5.40901	6.87567	1.24074	0	0.537472	0	0.115085	0	0	2.78702	11.8857	15.6356	12.8428	13.164	1.17061	0	0.470178	0	0.111412	0	0	2.28139	13.5564	18.3969	13.5356	15.6762	Contig7017	0.0289446
dd_Smed_v6_1024_0_1	732	-1.42964	7.07795	33.4314	7.38e-09	6.94e-08	-1.49702	7.07795	36.5479	1.49e-09	1.8e-08	71.2042	101.354	91.916	84.125	80.6939	85.8864	77.4804	88.5914	238.417	210.017	252.822	237.716	77.6744	127.744	96.018	102.157	87.5592	115.54	86.0129	109.504	486.543	369.661	516.641	391.707	73.284	105.643	83.9962	82.0695	84.7645	97.6836	77.5889	89.6377	554.936	434.944	544.508	466.459	Contig6896	0.0595179
dd_Smed_v6_10240_0_1	427	0.673907	0.912224	0.509481	0.475364	0.626505	0.866114	0.912224	0.83912	0.359649	0.550343	3.53254	1.80704	1.01215	1.46343	0.365131	5.26219	2.47908	0.843728	1.36106	1.92942	1.43371	0.168521	6.60607	3.90438	1.81255	3.04648	0.679192	12.1355	4.71786	1.78783	4.76149	5.82182	5.02248	0.476037	6.23268	3.22887	1.58561	2.44744	0.657514	10.26	4.2558	1.46347	5.43081	6.84997	5.2934	0.566882	NA	NA
dd_Smed_v6_10241_0_1	785	4.16658	3.94592	67.8886	1.73e-16	3.66e-15	4.02078	3.94592	64.0393	1.22e-15	2.77e-14	25.4939	6.16519	27.1383	35.1666	20.4473	20.9078	21.2757	22.3166	2.25736	0.988828	1.27079	0.70779	25.9328	7.24584	26.4354	39.8214	20.689	26.2275	22.024	25.7223	4.29562	1.62297	2.42152	1.08755	24.4671	5.99222	23.1256	31.9911	20.0286	22.1742	19.867	21.0556	4.89945	1.90959	2.55214	1.29509	NA	NA
dd_Smed_v6_10242_0_1	1818	-0.349714	1.05699	0.0921339	0.761482	0.849665	-0.27672	1.05699	0.0578874	0.809867	0.896876	1.53219	3.98611	1.70801	0	0	2.58411	1.88706	3.12179	3.18686	1.9053	1.92248	2.19078	0.672979	2.02287	0.718403	0	0	1.3997	0.843479	1.55368	2.61857	1.3503	1.5818	1.45351	0.634941	1.67289	0.628456	0	0	1.18338	0.76087	1.2718	2.98666	1.58877	1.66712	1.73089	NA	NA
dd_Smed_v6_10243_0_1	1878	1.62608	3.22872	13.6524	0.000219955	0.000926959	1.20317	3.22872	7.61813	0.00577843	0.0200331	13.2364	4.94278	13.664	22.0845	7.30262	10.5244	12.6174	9.78724	3.45243	4.24472	4.98541	4.78601	5.62805	2.42822	5.56361	10.4531	3.08855	5.51848	5.45955	4.71537	2.74615	2.91215	3.97091	3.07391	5.30994	2.00811	4.86702	8.39768	2.98997	4.66562	4.92485	3.85989	3.13217	3.42644	4.1851	3.66052	NA	NA
dd_Smed_v6_10244_0_1	3831	-0.397565	2.60777	0.608383	0.435397	0.590235	-0.30576	2.60777	0.361723	0.547551	0.71718	4.42632	1.80704	7.21158	7.89365	3.9708	7.04757	6.4012	5.31548	4.44833	9.11651	6.64721	7.8868	0.922601	0.435178	1.43943	1.83156	0.823261	1.81153	1.35779	1.2554	1.73452	3.06603	2.59544	2.48314	0.870454	0.359887	1.25921	1.47141	0.796985	1.53157	1.22481	1.02764	1.97834	3.6075	2.73544	2.95702	NA	NA
dd_Smed_v6_10245_0_1	1413	-0.86989	1.81695	0.628876	0.427768	0.583385	-0.314877	1.81695	0.083823	0.772182	0.873375	2.1706	0	7.46462	0	2.69284	5.16822	4.36614	1.89839	4.34874	4.92002	2.509	5.79714	1.22665	0	4.0396	0	1.5137	3.60178	2.51095	1.21561	4.59744	4.48626	2.65609	4.94862	1.15732	0	3.53382	0	1.46539	3.04514	2.26503	0.995068	5.24369	5.27855	2.79936	5.893	Contig1748	-0.110545
dd_Smed_v6_10246_0_1	1840	0.48768	2.26529	0.349616	0.55433	0.694155	-0.0155426	2.26529	0.000356395	0.984938	0.991895	10.3848	0	8.79307	4.3016	4.47285	3.85267	3.84812	4.38738	3.18686	4.67884	2.67192	6.20159	4.50676	0	3.65422	2.0781	1.93081	2.06188	1.69947	2.15744	2.58726	3.27628	2.17215	4.06535	4.25203	0	3.1967	1.66947	1.86918	1.74322	1.53303	1.76603	2.95095	3.85488	2.28932	4.84117	PL06017A2F10	0.0114949
dd_Smed_v6_10247_0_1	1027	0.653579	2.27779	1.49761	0.22104	0.362178	-0.101018	2.27779	0.0358301	0.849867	0.920199	5.19242	4.14556	8.22373	8.15973	3.78823	6.48377	1.77606	3.20616	4.7139	3.32825	3.58428	4.7186	4.03722	3.72413	6.1231	7.06253	2.9298	6.21693	1.4053	2.82466	6.85653	4.17547	5.22055	5.54186	3.80903	3.07981	5.35646	5.67379	2.83629	5.25612	1.26767	2.3122	7.82035	4.91287	5.50215	6.59945	NA	NA
dd_Smed_v6_10248_0_1	3156	-5.38775	1.68564	12.254	0.000464268	0.00183032	-6.63683	1.68564	16.4957	4.88e-05	0.000271636	0	0.850371	0	0	0	0	0.33301	0	3.718	11.9383	8.21126	12.3021	0	0.24859	0	0	0	0	0.0857439	0	1.75982	4.87377	3.89186	4.70169	0	0.205581	0	0	0	0	0.0773463	0	2.00719	5.73449	4.10179	5.59894	NA	NA
dd_Smed_v6_10249_0_1	11221	0.204459	4.04032	0.310409	0.577429	0.71215	0.281951	4.04032	0.591413	0.441873	0.627169	17.7478	7.175	26.0629	16.2751	23.8248	11.746	16.5025	18.8573	14.3741	13.8436	13.0012	17.1218	1.26298	0.589933	1.77609	1.28928	1.68643	1.0308	1.19509	1.52054	1.91356	1.58956	1.73315	1.84048	1.1916	0.487868	1.55371	1.03576	1.63261	0.871496	1.07805	1.24468	2.18255	1.87028	1.82663	2.19171	NA	NA
dd_Smed_v6_1025_0_1	2073	0.414048	6.76669	2.87729	0.0898368	0.179074	0.399532	6.76669	2.68141	0.101526	0.218773	105.806	124.792	143.346	102.573	118.941	105.855	122.918	123.944	92.6845	87.5474	97.4599	79.8791	40.7563	55.5392	52.876	43.9834	45.5728	50.2839	48.1835	54.0973	66.7887	54.4132	70.3252	46.478	38.4527	45.9302	46.2557	35.3347	44.1182	42.5127	43.4645	44.2828	76.1771	64.0227	74.1186	55.3477	PL05003B1A11	-0.187237
dd_Smed_v6_10250_0_1	7847	-1.13282	1.47087	3.04804	0.0808347	0.164321	-0.326135	1.47087	0.262404	0.608473	0.762973	2.04292	0.690926	1.64475	2.12862	2.0995	2.63109	2.55308	4.13426	4.21595	3.32825	2.80226	3.9771	0.207888	0.0812344	0.160276	0.24113	0.212513	0.33018	0.264389	0.4767	0.802577	0.546478	0.534181	0.611331	0.196138	0.0671799	0.140209	0.193715	0.20573	0.279152	0.238495	0.390216	0.915395	0.642987	0.562995	0.727995	NA	NA
dd_Smed_v6_10251_0_1	1288	-0.823466	0.535922	0.928241	0.335321	0.491651	-1.68822	0.535922	3.7244	0.053623	0.130733	0.680972	2.60426	0.632595	1.01997	0.273848	0.610789	0.925029	0.885914	2.39015	2.24295	2.83484	1.28076	0.422179	1.86544	0.375563	0.703923	0.168875	0.466976	0.583609	0.622338	2.77206	2.2437	3.29228	1.19941	0.398317	1.54269	0.328541	0.565506	0.163485	0.394806	0.526451	0.509431	3.16173	2.63994	3.46987	1.4283	NA	NA
dd_Smed_v6_10252_0_1	690	-2.54037	1.32621	6.17176	0.0129805	0.035376	-1.85523	1.32621	3.47908	0.0621492	0.147416	1.40451	0	0.632595	1.37474	3.1949	1.36253	0.888028	0.0843728	4.54792	5.01649	5.27867	5.19046	1.62539	0	0.70105	1.77103	3.67773	1.94454	1.04583	0.110638	9.84596	9.36723	11.4435	9.0734	1.53352	0	0.613276	1.42278	3.56034	1.64401	0.943401	0.0905656	11.23	11.0215	12.0608	10.8049	NA	NA
dd_Smed_v6_10253_0_1	972	0.964031	1.36159	1.70957	0.191041	0.324143	0.281679	1.36159	0.147416	0.701017	0.828331	4.554	3.34834	1.58149	4.52333	2.51028	2.72506	0.851026	2.65774	1.65982	2.91825	2.05282	0.539268	3.74119	3.17815	1.24415	4.13663	2.05129	2.76076	0.711475	2.47399	2.55088	3.86826	3.15913	0.669194	3.52973	2.62829	1.08838	3.32322	1.98582	2.33409	0.641794	2.02515	2.90946	4.55141	3.32954	0.7969	NA	NA
dd_Smed_v6_10255_0_1	1246	-1.0666	0.434769	0.915594	0.338635	0.495026	-0.647144	0.434769	0.343842	0.55762	0.72452	0	1.80704	0.379557	1.2417	0.456414	2.95998	0.296009	0.885914	1.75941	2.38766	1.4663	1.5841	0	1.33802	0.232933	0.885835	0.290946	2.33932	0.19305	0.643316	2.10933	2.46896	1.76031	1.53348	0	1.10652	0.203769	0.711648	0.28166	1.97779	0.174143	0.526603	2.40584	2.90498	1.85526	1.82612	NA	NA
dd_Smed_v6_10256_0_1	653	-2.40804	1.63388	4.78092	0.0287767	0.0700278	-1.70138	1.63388	2.52401	0.112125	0.235058	1.14914	0	3.41601	0	2.96669	1.59745	0.666021	2.19369	6.27413	7.4765	6.71238	3.70747	1.40522	0	4.00017	0	3.60853	2.40898	0.828814	3.03958	14.3528	14.7518	15.3762	6.84822	1.32579	0	3.49934	0	3.49336	2.03668	0.747641	2.48813	16.3703	17.357	16.2056	8.15511	Contig2077	-0.144926
dd_Smed_v6_10257_0_1	3307	4.42361	3.36076	98.1967	3.79e-23	1.29e-21	4.33679	3.36076	95.0909	1.82e-22	6.88e-21	15.4921	19.5585	10.8174	15.743	16.9329	7.98725	16.3915	16.7058	0.663929	0.916474	0.684272	0.572973	3.74076	5.4565	2.50127	4.23162	4.06696	2.37838	4.0278	4.57071	0.299904	0.357064	0.309513	0.208984	3.52933	4.51246	2.1881	3.39954	3.93716	2.01081	3.63332	3.74148	0.342061	0.420122	0.326208	0.248866	NA	NA
dd_Smed_v6_10259_0_1	4656	0.550817	1.148	0.541233	0.461922	0.613853	0.103765	1.148	0.0192483	0.889657	0.942843	4.97961	2.23222	2.21408	1.19735	1.96258	3.52379	1.51705	0.801541	2.15777	1.9053	1.33596	1.85374	0.854015	0.44232	0.363625	0.228593	0.3348	0.745273	0.26477	0.155763	0.692288	0.527243	0.429205	0.480229	0.805745	0.365794	0.318097	0.183644	0.324114	0.630094	0.238839	0.127504	0.789603	0.620355	0.452356	0.571873	NA	NA
dd_Smed_v6_1026_0_1	2160	1.24476	7.83478	15.8217	6.96e-05	0.000324098	1.03221	7.83478	10.9797	0.000921142	0.00391336	263.621	236.669	374.496	323.817	294.25	181.545	244.541	314.035	110.079	132.768	77.9092	185.003	97.4564	101.088	132.576	133.26	108.202	82.7657	91.9983	131.545	76.1285	79.1955	53.9535	103.309	91.9479	83.5985	115.977	107.057	104.748	69.9745	82.9881	107.68	86.8298	93.1816	56.8638	123.024	Contig4874	-0.121091
dd_Smed_v6_10260_0_1	2701	-1.01669	2.92033	6.90486	0.00859618	0.0247142	-0.937495	2.92033	5.92389	0.0149369	0.0451684	5.10729	6.59037	4.9975	5.32156	4.65542	6.34281	7.10422	5.14674	10.4237	13.9883	11.4045	8.72941	1.5099	2.25111	1.41482	1.75134	1.36901	2.31247	2.13734	1.72408	5.7649	6.67268	6.31593	3.89828	1.42456	1.86164	1.23768	1.40696	1.32531	1.95509	1.92802	1.41129	6.57527	7.85109	6.65661	4.64222	Contig5905	0.125681
dd_Smed_v6_10261_0_1	1129	-0.18748	3.03754	0.15281	0.695864	0.803755	-0.290588	3.03754	0.367562	0.544336	0.715112	7.7035	10.9485	11.1337	2.03993	5.52261	8.45708	7.88125	7.72011	8.09994	6.00532	9.15621	12.9424	5.44851	8.94692	7.54079	1.60612	3.88528	7.37642	5.67262	6.187	10.7172	6.85334	12.1313	13.8272	5.14054	7.399	6.59665	1.2903	3.76127	6.23642	5.11705	5.06453	12.2237	8.06365	12.7856	16.466	NA	NA
dd_Smed_v6_10262_0_1	1151	4.76952	1.87986	39.385	3.48e-10	3.8e-09	4.52548	1.87986	36.1405	1.84e-09	2.19e-08	8.6824	4.03926	3.35275	6.96238	2.32771	9.02089	4.58814	3.54366	0.298768	0.168824	0.260675	0.101113	6.02348	3.23772	2.2274	5.37697	1.6063	7.71779	3.23925	2.78565	0.387752	0.188982	0.338773	0.105961	5.68302	2.67755	1.94852	4.31966	1.55503	6.52503	2.922	2.28027	0.442258	0.222356	0.357046	0.126182	NA	NA
dd_Smed_v6_10264_0_1	723	-9.70463	0.793478	32.4063	1.25e-08	1.13e-07	-2.29324	0.793478	4.54608	0.0329942	0.0880204	0	0	0	0	0	1.4565	0.592018	1.26559	4.64751	3.97943	3.87754	3.80858	0	0	0	0	0	1.98377	0.665395	1.58382	9.60232	7.09157	8.02237	6.35387	0	0	0	0	0	1.67718	0.600227	1.29648	10.9521	8.34396	8.4551	7.56642	NA	NA
dd_Smed_v6_10265_0_1	1736	-4.16446	1.84421	16.2509	5.55e-05	0.000263597	-3.08268	1.84421	9.94064	0.00161669	0.00647662	0.383047	0	0.379557	1.19735	2.60156	0.516822	0.0370011	1.05466	9.85935	8.61004	8.60228	8.662	0.176192	0	0.167186	0.613094	1.1903	0.293164	0.01732	0.549684	8.48386	6.39021	7.41221	6.01841	0.166233	0	0.146254	0.492538	1.15231	0.247856	0.0156237	0.449959	9.67643	7.51874	7.81203	7.16694	NA	NA
dd_Smed_v6_10266_0_1	760	-2.56244	1.03252	6.52691	0.0106254	0.0298175	-2.75261	1.03252	7.41507	0.00646798	0.0220455	0.425608	0	0.379557	2.17297	1.09539	0.657773	0.370012	0.506237	2.95449	4.38943	6.6798	3.77488	0.447177	0	0.381888	2.54153	1.1448	0.852278	0.395626	0.602685	5.80715	7.4414	13.1472	5.99105	0.421901	0	0.334074	2.04178	1.10826	0.720562	0.356879	0.493344	6.62346	8.75557	13.8564	7.13435	PL020002001E02	-0.63769
dd_Smed_v6_10267_0_1	1113	-2.71847	3.09183	15.3682	8.85e-05	0.000403914	-4.41571	3.09183	34.4913	4.28e-09	4.86e-08	0.893776	7.3876	3.22623	1.33039	0.821545	0.0469838	1.73905	1.30778	23.6027	18.1124	20.0068	22.683	0.641235	6.12379	2.21653	1.06252	0.586284	0.0415692	1.2697	1.06314	31.6782	20.9673	26.8885	24.5821	0.604991	5.0643	1.93901	0.853595	0.567571	0.0351448	1.14535	0.87026	36.1312	24.6701	28.3389	29.2732	Contig4754	-0.408884
dd_Smed_v6_10268_0_1	769	0.121966	0.0846646	0.0115881	0.914275	0.949067	0.0756127	0.0846646	0.00446052	0.946751	0.973909	1.57475	0.425185	0.695854	1.37474	2.37335	0.281903	1.29504	0	1.65982	0.795886	0.619103	0.674085	1.63519	0.51011	0.691934	1.58909	2.45136	0.360987	1.36848	0	3.22426	1.33347	1.20426	1.05731	1.54277	0.421855	0.605301	1.27662	2.37312	0.305198	1.23446	0	3.67749	1.56897	1.26922	1.25908	Contig6875	-0.0464768
dd_Smed_v6_10269_0_1	1357	-0.909679	3.66136	3.70237	0.0543351	0.118799	-1.05689	3.66136	4.97304	0.0257453	0.0718331	7.66094	20.09	2.97319	9.13535	11.1365	8.692	5.47617	10.7153	12.5815	18.426	15.3798	28.5475	4.50802	13.6588	1.67539	5.98412	6.51839	6.30752	3.27929	7.14458	13.8499	17.4949	16.9534	25.3748	4.25321	11.2957	1.46563	4.80743	6.31034	5.33272	2.95812	5.84839	15.7967	20.5845	17.8678	30.2172	NA	NA
dd_Smed_v6_1027_0_1	2596	0.329009	7.49738	1.4587	0.227137	0.369403	0.152385	7.49738	0.313471	0.575558	0.738872	153.559	218.652	201.671	234.592	183.159	172.759	139.013	220.382	170.331	165.689	118.933	188.643	47.234	77.707	59.4035	80.3274	56.0396	65.5324	43.5145	76.8107	98.0131	82.2335	68.5302	87.6494	44.5642	64.2628	51.9659	64.5322	54.2509	55.4046	39.2528	62.8754	111.791	96.7561	72.2268	104.376	Contig5414	0.988655
dd_Smed_v6_10270_0_1	687	1.17439	2.31838	3.76238	0.0524179	0.115241	-0.0313344	2.31838	0.00272784	0.958346	0.979308	5.14985	10.9485	10.6908	4.70071	2.78412	0.98666	6.91922	2.91086	4.31554	2.62883	4.56181	2.42671	5.98579	14.7032	11.8995	6.08222	3.21887	1.41426	8.18432	3.83368	9.38368	4.93022	9.93265	4.26063	5.64746	12.1593	10.4096	4.88624	3.11613	1.19569	7.38276	3.13816	10.7027	5.80091	10.4684	5.07371	Contig2418	0.0749278
dd_Smed_v6_10271_0_1	5253	-4.90887	3.92091	36.304	1.69e-09	1.7e-08	-3.44955	3.92091	20.7605	5.2e-06	3.53e-05	2.76645	0	2.0243	0.532156	7.25698	0.657773	4.14413	2.61556	33.9932	45.7031	34.7675	46.0737	0.420532	0	0.294673	0.0900506	1.09729	0.123307	0.641075	0.450513	9.66672	11.2098	9.90036	10.5794	0.396762	0	0.257779	0.0723435	1.06226	0.10425	0.578289	0.368779	11.0256	13.1895	10.4344	12.5983	Contig4858	0.0742057
dd_Smed_v6_10272_0_1	1233	-0.398984	3.72702	1.32289	0.250074	0.397455	-0.482864	3.72702	1.93696	0.163999	0.313573	12.4703	10.417	7.90743	17.5612	15.0617	10.7123	8.28826	11.6434	14.0421	15.8212	20.1046	13.8862	8.07602	7.79459	4.90394	12.6603	9.70245	8.55537	5.46239	8.54415	17.0123	16.5325	24.3902	13.5841	7.61955	6.44604	4.28995	10.1709	9.39277	7.23317	4.92741	6.99404	19.4037	19.4521	25.7059	16.1765	Contig3150	-0.0716255
dd_Smed_v6_10273_0_1	2723	-1.20448	1.32057	1.91534	0.166372	0.291162	-0.83426	1.32057	0.937	0.333051	0.523445	2.63877	0	1.64475	1.99559	2.00822	1.59745	2.29407	2.23588	3.08727	2.12236	4.36631	4.95453	0.773814	0	0.461874	0.651445	0.585781	0.577695	0.684608	0.742936	1.69364	1.00423	2.39856	2.19466	0.730077	0	0.404046	0.523348	0.567085	0.488414	0.617558	0.60815	1.93172	1.18158	2.52794	2.61348	Contig2614	-0.0632331
dd_Smed_v6_10275_0_1	424	0.069524	3.11703	0.0343499	0.852964	0.908943	0.165064	3.11703	0.194408	0.659273	0.799797	6.93741	10.4702	6.26269	10.4657	6.52672	10.2895	11.6924	7.97322	7.20363	7.93474	8.24385	9.16756	13.0652	22.7825	11.2945	21.9411	12.2265	23.8971	22.4088	17.0145	25.3793	24.1116	29.0836	26.0796	12.3267	18.8408	9.8804	17.6267	11.8362	20.2039	20.2141	13.9277	28.9469	28.3698	30.6524	31.0566	NA	NA
dd_Smed_v6_10276_0_1	2060	-1.2487	1.37148	1.93459	0.164257	0.288306	-0.956664	1.37148	1.15296	0.282931	0.468437	2.76645	0	0.885633	2.83817	2.46463	2.20824	1.66505	1.64527	2.52293	6.60826	3.03035	3.33672	1.07236	0	0.328745	1.22469	0.950292	1.0556	0.656815	0.722637	1.8295	4.13314	2.20044	1.95374	1.01174	0	0.287585	0.983871	0.919961	0.892457	0.592488	0.591534	2.08667	4.86306	2.31913	2.32658	NA	NA
dd_Smed_v6_10277_0_1	1653	-1.90498	2.33741	5.72332	0.0167411	0.0441693	-2.00873	2.33741	6.33306	0.0118508	0.037003	3.27718	2.71056	3.35275	1.153	3.65131	2.06729	4.03313	0	9.22862	7.7418	10.5899	11.7628	1.58311	1.51286	1.55096	0.620031	1.75448	1.23154	1.98268	0	8.33986	6.03433	9.58306	8.58323	1.49363	1.25111	1.35678	0.498111	1.69848	1.04121	1.78849	0	9.51218	7.1	10.1	10.2212	PL05016A2E07	-0.551262
dd_Smed_v6_10278_0_1	1268	-1.57631	1.49329	2.3724	0.123497	0.231453	-1.60823	1.49329	2.47235	0.115864	0.240517	0.936337	3.93297	1.64475	0.0886927	1.50617	2.16126	2.77509	0	4.84668	5.11296	6.22362	3.50524	0.589653	2.86163	0.991864	0.0621761	0.943464	1.67844	1.77844	0	5.70979	5.19533	7.34189	3.33436	0.556324	2.36653	0.867679	0.0499501	0.913351	1.41904	1.60426	0	6.51241	6.11284	7.73792	3.97067	NA	NA
dd_Smed_v6_10279_0_1	1328	0.806698	3.97255	6.74049	0.00942485	0.026786	0.606532	3.97255	3.83265	0.0502633	0.124132	14.5132	26.3083	17.2698	18.7142	15.1073	14.377	19.9066	17.423	9.69337	12.3483	12.9686	8.86422	8.72668	18.2771	9.94404	12.5264	9.03567	10.6608	12.181	11.8707	10.9036	11.9803	14.6076	8.05111	8.23343	15.115	8.699	10.0633	8.74727	9.01322	10.988	9.71705	12.4364	14.0961	15.3955	9.58756	Contig4245	0.0536501
dd_Smed_v6_1028_0_1	426	-9.6554	0.497996	28.8289	7.91e-08	6.31e-07	-9.6554	0.497996	29.9206	4.5e-08	4.42e-07	0	0	0	0	0	0	0	0	1.46064	1.13353	4.95283	8.22384	0	0	0	0	0	0	0	0	5.12188	3.42835	17.3911	23.2851	0	0	0	0	0	0	0	0	5.84186	4.0338	18.3292	27.7288	NA	NA
dd_Smed_v6_10280_0_1	1520	-10.9853	1.76912	74.9498	4.83e-18	1.17e-16	-10.9853	1.76912	77.8148	1.13e-18	3.26e-17	0	0	0	0	0	0	0	0	10.5897	8.99592	8.17868	11.8976	0	0	0	0	0	0	0	0	10.4072	7.62539	8.04867	9.44125	0	0	0	0	0	0	0	0	11.8701	8.97205	8.48282	11.243	PL06011B1C10	0.0230182
dd_Smed_v6_10281_0_1	657	-2.06532	0.449841	2.05222	0.151985	0.271082	-3.37424	0.449841	4.91371	0.0266443	0.073902	0.851216	1.80704	0.0632595	0	0.228207	0	0.851026	0	3.25325	3.61766	3.84496	0.741494	1.03456	2.53755	0.0736263	0	0.27589	0	1.05259	0	7.39686	7.09452	8.75408	1.36131	0.976088	2.09852	0.064408	0	0.267084	0	0.949503	0	8.43663	8.34742	9.22628	1.62109	PL08001B2E03	0.103836
dd_Smed_v6_10282_0_1	10730	-3.25451	2.12839	11.1436	0.000843199	0.00314399	-2.91673	2.12839	9.28409	0.00231153	0.00893327	0.0851216	2.81685	1.45497	0	0.593338	1.12761	2.77509	0.970287	10.0917	11.3112	7.07081	13.0098	0.00633466	0.242201	0.103687	0	0.0439212	0.103485	0.210165	0.0818184	1.40495	1.35822	0.985721	1.46247	0.00597661	0.200298	0.0907054	0	0.0425193	0.087492	0.189581	0.0669746	1.60244	1.59808	1.03889	1.74156	NA	NA
dd_Smed_v6_10284_0_1	728	0.346608	3.44112	0.750042	0.386463	0.543521	0.0409004	3.44112	0.010467	0.918512	0.958567	11.4063	15.2535	15.4353	7.80496	15.2442	6.76567	12.2844	6.03265	13.2122	9.02004	7.10339	9.87535	12.5111	19.3309	16.2127	9.53003	16.632	9.15162	13.7121	7.49769	27.1105	15.9638	14.5955	16.3619	11.804	15.9864	14.1828	7.65609	16.1012	7.73727	12.3692	6.13744	30.9215	18.7831	15.3828	19.4844	NA	NA
dd_Smed_v6_10285_0_1	484	-1.28547	2.25969	2.59608	0.107128	0.20637	-1.96176	2.25969	5.80565	0.0159748	0.0478879	2.59621	6.11204	1.70801	3.45901	1.68873	2.913	4.07013	0	10.5565	7.18709	7.59216	8.52718	4.28329	11.6507	2.69846	6.35276	2.77132	5.92671	6.83353	0	32.5813	19.1323	23.4641	21.2507	4.04119	9.63501	2.36061	5.10358	2.68287	5.01075	6.16427	0	37.1612	22.5111	24.7298	25.3061	Contig6047	-0.0612608
dd_Smed_v6_10286_0_1	2054	-10.2441	2.83054	113.845	1.41e-26	5.78e-25	-6.76624	2.83054	83.1902	7.45e-20	2.38e-18	0	0	0	0.0443463	0.31949	0	0.370012	0.0421864	14.3741	25.2272	18.5731	25.1434	0	0	0	0.0191917	0.123546	0	0.146385	0.0185833	10.4538	15.8244	13.526	14.7651	0	0	0	0.0154179	0.119603	0	0.132049	0.0152118	11.9233	18.6191	14.2556	17.5828	Contig5062	0.289062
dd_Smed_v6_10288_0_1	1921	5.39571	3.44014	100.485	1.19e-23	4.18e-22	5.96048	3.44014	117.642	2.08e-27	9.92e-26	10.9381	15.9976	11.2602	13.5256	12.095	17.337	21.7567	25.3118	0	0.313531	0.456181	0.438156	4.54672	7.68316	4.4822	6.25872	5.00091	8.88722	9.20339	11.9219	0	0.210287	0.355218	0.275115	4.28973	6.35388	3.92101	5.02803	4.84129	7.51373	8.30202	9.75902	0	0.247424	0.374378	0.327617	NA	NA
dd_Smed_v6_10289_0_1	1594	0.270594	1.40829	0.151439	0.697164	0.804362	-0.224951	1.40829	0.104319	0.746707	0.858534	3.91559	2.71056	1.45497	4.07986	2.82976	2.25522	2.96009	0.590609	3.15366	2.12236	2.80226	2.02226	1.96152	1.56885	0.697972	2.27516	1.41005	1.39322	1.50904	0.335245	2.95544	1.7155	2.62969	1.53025	1.85065	1.29742	0.610583	1.82778	1.36504	1.1779	1.36124	0.274424	3.37088	2.01846	2.77153	1.82227	Contig4302	-0.0667541
dd_Smed_v6_1029_0_1	3048	0.426182	4.34764	1.73493	0.187782	0.319853	0.201849	4.34764	0.390338	0.532122	0.705609	24.4724	34.068	21.2552	13.8361	25.6961	14.2361	21.4977	18.6886	14.1417	18.2571	17.172	20.0877	6.41129	10.312	5.3324	4.03508	6.69613	4.59933	5.73138	5.54769	6.93077	7.71752	8.42732	7.94931	6.04891	8.52791	4.66476	3.24164	6.48241	3.88852	5.17006	4.5412	7.90502	9.08045	8.88189	9.46633	Contig3940	-0.0250086
dd_Smed_v6_1029_1_1	2347	5.87052	8.19521	260.7	1.21e-58	2.88e-56	5.80343	8.19521	256.37	1.06e-57	2.79e-55	503.366	333.664	501.774	444.661	417.573	360.366	510.949	413.511	4.87988	7.25944	11.0461	7.28012	171.259	131.162	163.481	168.411	141.316	151.199	176.908	159.413	3.10592	3.9852	7.04013	3.74144	161.579	108.47	143.013	135.296	136.805	127.832	159.582	130.492	3.54252	4.689	7.41987	4.45544	Contig6700	3.44383
dd_Smed_v6_10290_0_1	2216	1.01845	2.47884	3.71972	0.0537735	0.117807	0.858518	2.47884	2.65904	0.102963	0.22082	9.61874	6.21834	6.83202	4.96679	3.05797	10.5244	7.36323	3.79677	3.718	2.94236	4.85507	2.12337	3.46602	2.58891	2.3575	1.99233	1.09606	4.67676	2.70011	1.55023	2.50631	1.71075	3.27726	1.15576	3.27012	2.141	2.06233	1.60057	1.06108	3.95398	2.43566	1.26898	2.85862	2.01287	3.45403	1.37633	NA	NA
dd_Smed_v6_10291_0_1	1754	-0.173498	1.74338	0.0409283	0.839676	0.900113	0.73651	1.74338	0.736093	0.390915	0.581481	3.87303	0.0531482	5.12402	0.753888	3.33182	3.80569	2.33107	8.94351	3.25325	3.61766	2.31349	1.85374	1.76321	0.0279557	2.23385	0.382061	1.50877	2.1366	1.07996	4.61349	2.77066	2.65741	1.97298	1.27477	1.66355	0.0231191	1.95416	0.306934	1.46062	1.80639	0.974193	3.77649	3.16013	3.12671	2.0794	1.51804	NA	NA
dd_Smed_v6_10293_0_1	911	-1.1944	3.30382	6.97617	0.0082602	0.0239	-1.36553	3.30382	9.05752	0.00261616	0.0099669	4.38376	10.3107	3.92209	9.49012	5.34004	6.24885	10.5823	2.7843	17.0962	16.7377	16.1944	14.358	3.84248	10.442	3.29209	9.25994	4.65584	6.75461	9.43943	2.76534	28.0334	23.6722	26.5908	19.0103	3.6253	8.63541	2.87991	7.43911	4.50724	5.71071	8.51494	2.26364	31.974	27.8527	28.0251	22.6382	NA	NA
dd_Smed_v6_10294_0_1	2370	-2.61869	1.15685	3.8089	0.050981	0.112552	-1.70089	1.15685	1.72335	0.189263	0.349375	2.00036	0	0.822373	0	1.50617	3.1949	0.666021	0	4.48152	3.83472	4.23597	4.92082	0.673973	0	0.265334	0	0.504773	1.32748	0.228361	0	2.8247	2.08471	2.67355	2.50439	0.635878	0	0.232113	0	0.488662	1.12232	0.205996	0	3.22176	2.45287	2.81777	2.98232	PL06021A1E07	-0.0751713
dd_Smed_v6_10295_0_1	949	-0.0968955	2.60878	0.0347953	0.852025	0.908237	0.340132	2.60878	0.430733	0.51163	0.688674	3.83047	1.75389	6.19943	9.31273	7.02877	6.6717	7.03022	7.84667	4.78029	3.52119	6.06069	8.22384	3.22307	1.70509	4.99526	8.723	5.88281	6.92292	6.01984	7.48117	7.52459	4.78061	9.55302	10.4525	3.04089	1.41009	4.36983	7.00775	5.69505	5.853	5.43027	6.12391	8.58232	5.62488	10.0683	12.4473	Contig2750	-0.11135
dd_Smed_v6_10296_0_1	430	-0.606413	0.508551	0.152111	0.696527	0.804136	-8.95599	0.508551	15.6668	7.55e-05	0.000406162	0	6.32463	0	0.0443463	0	0	0	0	2.02498	3.03884	3.38878	1.24706	0	13.57	0	0.0916736	0	0	0	0	7.03474	9.1054	11.7885	3.49809	0	11.2222	0	0.0736473	0	0	0	0	8.02361	10.7134	12.4244	4.16566	Contig6595	0.366382
dd_Smed_v6_10299_0_1	660	-1.669	3.66864	10.6902	0.00107707	0.00393887	-2.98441	3.66864	30.7905	2.87e-08	2.91e-07	6.08619	14.6689	1.89778	10.377	5.8421	2.95998	1.36904	3.12179	24.5986	23.4666	26.0349	31.0753	7.36351	20.5053	2.19875	13.9761	7.03067	4.41635	1.6856	4.27968	55.6751	45.8106	59.0061	56.7917	6.94731	16.9576	1.92346	11.2279	6.80626	3.73382	1.52052	3.50324	63.5013	53.9008	62.1889	67.6297	NA	NA
dd_Smed_v6_103_0_1	708	0.000399688	2.54155	6.48e-07	0.999358	0.999586	-0.678536	2.54155	1.85379	0.173344	0.32702	6.42668	9.56667	7.90743	2.3947	2.96669	3.66474	5.36517	4.38738	7.23683	5.04061	7.88542	6.10047	7.24831	12.4664	8.54034	3.00658	3.32821	5.09716	6.1579	5.6069	15.269	9.17297	16.66	10.3931	6.83862	10.3095	7.47105	2.41538	3.22198	4.30941	5.5548	4.58968	17.4153	10.7929	17.5587	12.3764	PL05002A1H07	0.176991
dd_Smed_v6_1030_0_1	461	-0.00622807	6.95532	0.000566621	0.981009	0.990023	0.224348	6.95532	0.735237	0.391191	0.581826	119.681	98.271	152.076	98.3602	134.962	127.185	142.676	144.657	102.677	108.482	104.335	154.871	207.304	196.669	252.25	189.659	232.531	271.678	251.498	283.916	332.71	303.19	338.543	405.212	195.587	162.643	220.668	152.365	225.109	229.691	226.866	232.407	379.479	356.734	356.804	482.542	Contig6650	-0.232915
dd_Smed_v6_10301_0_1	598	-0.198374	2.39559	0.136953	0.711329	0.814768	0.323258	2.39559	0.365841	0.54528	0.715578	5.14985	2.71056	2.72016	6.74064	6.57236	9.06787	6.5122	2.7843	5.11226	4.17237	7.16856	3.47154	6.87665	4.18186	3.47829	10.0197	8.72955	14.9322	8.84931	4.21275	12.7704	8.98963	17.9314	7.0022	6.48797	3.45835	3.04279	8.04948	8.45092	12.6245	7.98262	3.44846	14.5656	10.5772	18.8987	8.33847	Contig3383	-0.0658673
dd_Smed_v6_10302_0_1	3842	0.6217	3.12574	2.66834	0.102363	0.198705	0.289558	3.12574	0.581429	0.445753	0.629817	11.6191	14.6157	10.0583	6.20849	9.08263	9.72565	7.73324	7.21387	6.27413	8.03121	5.57193	7.71828	2.41489	3.50975	2.00188	1.43643	1.8777	2.49276	1.63564	1.69888	2.43945	2.69329	2.16936	2.42313	2.2784	2.90252	1.75124	1.15397	1.81777	2.10751	1.47544	1.39066	2.78236	3.16894	2.28638	2.88555	PL010001001G10	0.176718
dd_Smed_v6_10304_0_1	6566	0.213742	1.95897	0.1403	0.707983	0.812408	0.364543	1.95897	0.410211	0.521862	0.697019	2.55365	4.57074	6.26269	2.03993	3.1949	3.24188	6.03119	4.59831	2.98768	3.6659	3.97529	2.62893	0.310558	0.642241	0.729344	0.276166	0.386481	0.4862	0.746422	0.633649	0.679717	0.719349	0.905634	0.482939	0.293005	0.531126	0.638027	0.221862	0.374145	0.41106	0.673319	0.51869	0.775264	0.846387	0.954484	0.575101	NA	NA
dd_Smed_v6_10305_0_1	1137	-2.3983	-0.128923	2.70898	0.0997848	0.194737	-0.789942	-0.128923	0.326046	0.567997	0.733072	0.851216	0	0.189778	0	1.23232	0.563806	1.44304	0	0.863108	1.54354	1.69439	1.51669	0.597809	0	0.127632	0	0.860863	0.488301	1.03134	0	1.13396	1.74911	2.22914	1.60898	0.564019	0	0.111652	0	0.833386	0.412836	0.930332	0	1.29337	2.058	2.34938	1.91603	NA	NA
dd_Smed_v6_10306_0_1	6767	-0.136237	4.7982	0.209515	0.647148	0.768203	-0.319719	4.7982	1.15202	0.283127	0.468688	40.0923	17.592	23.0264	30.9537	25.9243	30.7744	22.8667	18.8573	27.885	30.1713	31.8024	32.9628	4.73094	2.39846	2.60198	4.06605	3.04287	4.47829	2.74593	2.52136	6.15559	5.74458	7.02987	5.87545	4.46354	1.9835	2.2762	3.26652	2.94574	3.78619	2.477	2.06392	7.02088	6.75908	7.40907	6.99669	NA	NA
dd_Smed_v6_10308_0_1	2503	-2.55697	1.89006	6.22629	0.0125867	0.0344084	-2.18636	1.89006	4.70111	0.0301432	0.081827	2.08548	0	1.96104	1.2417	1.96258	2.06729	2.81209	0	7.93396	8.10356	7.39665	7.78569	0.665316	0	0.5991	0.440971	0.622785	0.813315	0.912958	0	4.73504	4.17134	4.42037	3.75188	0.627711	0	0.52409	0.35426	0.602907	0.68762	0.823544	0	5.40064	4.908	4.65881	4.46788	NA	NA
dd_Smed_v6_10309_0_1	776	0.932444	4.34574	6.98249	0.00823112	0.0238211	0.626182	4.34574	3.17666	0.0746973	0.171034	17.0243	14.8815	35.8049	36.5414	19.2607	15.1758	22.5337	27.2946	15.9011	11.8177	10.9158	15.9758	17.5183	17.6928	35.282	41.858	19.7143	19.2579	23.5968	31.8248	30.6098	19.6215	21.0415	24.8322	16.5281	14.6317	30.8645	33.6272	19.0851	16.2816	21.2858	26.051	34.9126	23.0866	22.1765	29.5711	Contig2412	0.26959
dd_Smed_v6_1031_0_1	2413	-0.388746	5.81449	1.47693	0.224256	0.365986	-0.728739	5.81449	5.15034	0.0232418	0.0659121	64.8201	48.9495	52.3156	51.4861	32.3141	61.2669	55.2427	23.0759	61.845	77.7797	95.5374	49.7138	21.4504	18.7156	16.5785	18.9665	10.6367	25.0027	18.6037	8.65273	38.2862	41.5307	59.2244	24.8504	20.238	15.4775	14.5028	15.237	10.2972	21.1386	16.7817	7.08292	43.668	48.8651	62.419	29.5927	PL06016B2H06	-0.184069
dd_Smed_v6_10310_0_1	1771	2.13767	4.50861	50.0544	1.5e-12	2.14e-11	1.72419	4.50861	33.3675	7.63e-09	8.3e-08	27.8773	40.1269	30.3013	39.3796	30.8536	23.163	25.5678	23.7931	6.07495	7.71768	11.1764	6.3027	12.5694	20.904	13.0832	19.7655	13.8375	12.8794	11.7316	12.1558	5.12412	5.61472	9.43994	4.29261	11.859	17.2873	11.4452	15.8789	13.3959	10.8889	10.5826	9.95045	5.84441	6.60629	9.94914	5.11179	NA	NA
dd_Smed_v6_10311_0_1	4184	-1.34675	3.25559	6.29832	0.0120852	0.0332395	-0.351067	3.25559	0.446164	0.504162	0.681723	6.299	3.87982	9.61544	0.753888	12.2319	10.4304	6.21619	12.0231	14.2413	10.9736	11.0787	15.8747	1.20216	0.855523	1.75732	0.160166	2.32206	2.45487	1.2073	2.60002	5.08455	3.37922	3.96078	4.57644	1.13421	0.707507	1.53729	0.128672	2.24795	2.07548	1.08906	2.12831	5.79928	3.976	4.17443	5.44979	NA	NA
dd_Smed_v6_10312_0_1	1315	-1.36779	3.03585	9.79832	0.00174672	0.00611049	-1.22953	3.03585	8.0024	0.00467153	0.0166256	8.42703	3.93297	4.04861	4.34594	8.76314	5.54409	3.95912	4.6405	19.1876	9.93651	12.2517	12.3358	5.1172	2.75935	2.35425	2.93774	5.29305	4.15167	2.44656	3.19293	21.7966	9.73573	13.9366	11.315	4.82796	2.28195	2.05949	2.36008	5.12411	3.51005	2.20695	2.61366	24.8605	11.4551	14.6883	13.4743	Contig6888	-0.265773
dd_Smed_v6_10314_0_1	2220	-0.764481	2.09555	1.3843	0.23937	0.385032	-0.638643	2.09555	0.972522	0.324052	0.513914	7.36301	0.744074	3.85883	1.28604	5.06619	3.14791	3.1451	3.12179	6.34053	4.65472	5.93036	5.62861	2.64841	0.309226	1.32915	0.514942	1.81259	1.39633	1.15123	1.27234	4.26645	2.70148	3.99588	3.05817	2.49872	0.255726	1.16274	0.413686	1.75474	1.18053	1.03848	1.0415	4.86619	3.17856	4.21142	3.64178	NA	NA
dd_Smed_v6_10315_0_1	4734	-3.43607	0.586391	4.92967	0.0263994	0.0650991	-3.56728	0.586391	5.29497	0.0213871	0.0613835	0.127682	0	1.20193	0	0.410772	0	0.777024	0	5.54381	3.08707	2.90001	2.83116	0.021537	0	0.194144	0	0.0689199	0	0.133379	0	1.74934	0.840192	0.916338	0.721355	0.0203197	0	0.169836	0	0.0667202	0	0.120316	0	1.99525	0.988572	0.965765	0.859016	NA	NA
dd_Smed_v6_10316_0_1	1045	-2.25391	0.744066	3.48469	0.061939	0.132556	-1.37562	0.744066	1.37963	0.240164	0.417909	0.383047	0	0	2.08428	0.31949	2.34919	1.03603	0.885914	3.98358	3.4006	2.90001	1.65151	0.292698	0	0	1.77294	0.242836	2.21371	0.805637	0.767054	5.69445	4.19276	4.15114	1.90624	0.276154	0	0	1.42432	0.235085	1.87159	0.726734	0.627893	6.49491	4.93321	4.37506	2.27002	NA	NA
dd_Smed_v6_10318_0_1	1221	-1.66869	1.72881	4.79264	0.0285816	0.0696565	-1.26795	1.72881	2.84969	0.0913914	0.201598	0.212804	3.98611	1.20193	1.64081	2.0995	0.845708	3.2931	3.03742	6.07495	7.33179	4.52923	4.44896	0.13917	3.01194	0.752725	1.19454	1.36575	0.682062	2.19166	2.25082	7.43228	7.73668	5.54872	4.39498	0.131304	2.49084	0.65848	0.959647	1.32216	0.576652	1.97701	1.84246	8.47703	9.103	5.84802	5.2337	NA	NA
dd_Smed_v6_10319_0_1	3165	1.23404	2.72748	5.58374	0.018128	0.0472572	1.12119	2.72748	4.63639	0.0313008	0.0844083	8.08655	16.1039	6.57898	2.70513	4.7467	9.06787	7.25223	9.87161	4.48152	3.56943	3.1281	3.03338	2.0402	4.69428	1.58949	0.759747	1.19122	2.82131	1.862	2.82205	2.11518	1.45306	1.4784	1.15602	1.92488	3.88212	1.39048	0.610354	1.15319	2.38529	1.67964	2.31007	2.41251	1.70968	1.55814	1.37664	NA	NA
dd_Smed_v6_1032_0_1	2409	-0.0546399	8.17619	0.0455871	0.830928	0.894092	0.0347603	8.17619	0.0184561	0.891937	0.943889	242.682	287.16	315.222	273.44	304.291	299.475	256.899	329.307	252.957	281.599	277.163	349.918	80.4421	109.976	100.058	100.897	100.328	122.417	86.6579	123.684	156.857	150.61	172.101	175.203	75.8953	90.949	87.5304	81.0573	97.1262	103.498	78.1708	101.245	178.907	177.208	181.384	208.638	PL05001B1E12	0.447686
dd_Smed_v6_10320_0_1	1019	-3.4371	2.26824	11.6793	0.000631999	0.00242392	-1.21652	2.26824	1.74835	0.186084	0.345109	0.55329	0	2.90994	0	3.33182	4.36949	2.99709	5.31548	6.97126	7.8865	13.718	8.662	0.433573	0	2.18364	0	2.59704	4.22256	2.39006	4.71975	10.2195	9.97173	20.1373	10.2531	0.409066	0	1.91024	0	2.51415	3.56998	2.15598	3.86348	11.6561	11.7328	21.2235	12.2098	Contig62	-0.247569
dd_Smed_v6_10322_0_1	1990	-3.84541	1.49474	14.328	0.000153564	0.000669503	-1.72053	1.49474	3.48727	0.0618425	0.146758	1.06402	0	0.569335	0	1.55181	1.69142	1.48005	2.489	4.94627	9.04415	4.65957	5.15675	0.426953	0	0.21877	0	0.619379	0.836983	0.604373	1.13168	3.71296	5.85565	3.50249	3.12562	0.40282	0	0.191379	0	0.59961	0.70763	0.545181	0.926363	4.23488	6.88977	3.69142	3.7221	NA	NA
dd_Smed_v6_10323_0_1	1400	-0.395396	1.76399	0.501164	0.478989	0.629407	-0.535622	1.76399	0.919496	0.337607	0.52855	3.40486	2.49796	3.92209	2.52774	3.56003	2.913	2.36807	2.36244	3.31965	3.52119	5.93036	3.47154	1.94202	1.64615	2.14221	1.60494	2.01975	2.04895	1.37452	1.5268	3.54208	3.24057	6.33632	2.99094	1.83226	1.36135	1.874	1.28935	1.95528	1.73229	1.2399	1.24981	4.03999	3.81286	6.67811	3.56172	Contig6637	-0.583549
dd_Smed_v6_10324_0_1	1266	-4.62709	2.26833	18.5658	1.64e-05	8.66e-05	-2.05644	2.26833	4.6654	0.0307762	0.0832872	1.61731	0	0.126519	0	2.55592	0.563806	4.58814	2.91086	11.8179	9.62298	9.41689	13.4143	1.0201	0	0.0764178	0	1.60356	0.438545	2.945	2.08036	13.9445	9.79346	11.1265	12.7805	0.962442	0	0.06685	0	1.55238	0.37077	2.65657	1.70293	15.9047	11.523	11.7267	15.2195	Contig7447	0.037483
dd_Smed_v6_10326_0_1	862	0.752494	1.61558	1.31786	0.250976	0.398568	0.526143	1.61558	0.64794	0.42085	0.607972	3.10694	1.5413	4.87098	5.14418	1.3236	4.98028	3.44111	2.7843	1.72622	2.3153	1.95506	2.69634	2.87812	1.64965	4.32097	5.30473	1.21961	5.68939	3.24395	2.92254	2.99146	3.46068	3.39264	3.77295	2.71544	1.36424	3.77997	4.26163	1.18068	4.81011	2.92624	2.39232	3.41196	4.07184	3.57564	4.49296	NA	NA
dd_Smed_v6_10327_0_1	638	-5.96359	0.833928	13.4221	0.000248683	0.00103639	-6.05767	0.833928	13.918	0.000190958	0.000939839	0	0	0.316297	0	0	0.281903	0	0	2.15777	4.31708	7.85283	5.25787	0	0	0.379095	0	0	0.435109	0	0	5.05219	8.71825	18.4115	9.94036	0	0	0.33163	0	0	0.367864	0	0	5.76237	10.2579	19.4047	11.8373	Contig5086	0.0399616
dd_Smed_v6_10328_0_1	527	-4.18807	-0.060282	5.01423	0.0251398	0.0624502	-3.19956	-0.060282	3.25773	0.0710877	0.164345	0.0425608	0	0.442816	0	0.958469	0	0	0	1.65982	2.24295	1.82473	3.20191	0.0644885	0	0.642519	0	1.44457	0	0	0	4.70485	5.48364	5.1793	7.32843	0.0608435	0	0.562073	0	1.39846	0	0	0	5.36621	6.45207	5.45868	8.72696	NA	NA
dd_Smed_v6_10329_0_1	1095	-1.81094	2.68741	6.73201	0.00946979	0.0269079	-0.933736	2.68741	1.88449	0.169824	0.322278	4.68169	3.13574	4.11187	0.0886927	5.47696	2.20824	5.80918	8.56383	11.4528	7.86239	12.5776	10.2798	3.41406	2.64203	2.87142	0.0719994	3.97281	1.98587	4.31105	7.07628	15.624	9.25125	17.1817	11.3236	3.22109	2.18493	2.51191	0.0578417	3.84601	1.67896	3.88884	5.79248	17.8202	10.885	18.1085	13.4845	NA	NA
dd_Smed_v6_1033_0_1	764	0.0889775	6.61051	0.0751904	0.783924	0.866549	0.466348	6.61051	2.05868	0.151341	0.294652	148.069	91.468	55.4153	66.6969	168.417	95.5181	97.757	108.208	74.4929	98.8345	68.0688	98.6861	154.758	110.456	55.4637	77.601	175.091	123.115	103.977	128.15	145.652	166.677	133.272	155.803	146.011	91.3455	48.5194	62.3419	169.502	104.088	93.7937	104.9	166.126	196.112	140.461	185.536	Contig7604	1.96421
dd_Smed_v6_10330_0_1	3997	-0.155038	2.58	0.0386451	0.844153	0.902703	0.342284	2.58	0.188644	0.664048	0.803142	8.59728	0	9.23588	2.26166	6.25287	6.76567	5.51317	9.82943	5.21185	5.28179	5.60451	6.26899	1.71755	0	1.76692	0.502978	1.24256	1.66685	1.12086	2.22508	1.94783	1.70258	2.09743	1.89181	1.62047	0	1.54569	0.404075	1.2029	1.40924	1.01108	1.82139	2.22164	2.00326	2.21057	2.25283	NA	NA
dd_Smed_v6_10331_0_1	1182	-0.604415	1.3743	0.414797	0.519545	0.664985	-0.750902	1.3743	0.638712	0.424178	0.610831	3.02182	3.87982	1.89778	0	2.82976	0.516822	1.51705	3.07961	2.92129	3.90707	2.54158	4.01081	2.04143	3.02835	1.22773	0	1.90154	0.430568	1.04295	2.35737	3.69192	4.25887	3.21641	4.09287	1.92604	2.50441	1.07401	0	1.84084	0.364026	0.940807	1.92969	4.21089	5.011	3.3899	4.87393	NA	NA
dd_Smed_v6_10333_0_1	520	-0.985072	1.2093	0.759863	0.383371	0.540377	-0.891581	1.2093	0.625373	0.429058	0.615698	1.61731	2.71056	0	2.26166	0.867186	4.18156	1.99806	0	4.44833	3.30413	2.76967	2.56152	2.48355	4.80914	0	3.86616	1.32459	7.9187	3.1224	0	12.7787	8.1868	7.96727	5.94167	2.34318	3.9771	0	3.10593	1.28231	6.69489	2.8166	0	14.575	9.6326	8.39703	7.07555	Contig7308	-0.656456
dd_Smed_v6_10334_0_1	2147	-9.40556	0.277273	29.8274	4.72e-08	3.9e-07	-7.71048	0.277273	25.9852	3.44e-07	2.91e-06	0	0	0	0	0	0.0469838	0	0	2.29056	4.96826	3.16068	2.83116	0	0	0	0	0	0.0215494	0	0	1.59369	2.98148	2.20208	1.59054	0	0	0	0	0	0.018219	0	0	1.81771	3.50802	2.32086	1.89408	NA	NA
dd_Smed_v6_10335_0_1	1631	-1.63735	2.28736	7.4235	0.00643774	0.0193294	-0.944679	2.28736	2.57995	0.108225	0.228966	4.3412	2.71056	2.40386	0.576502	5.47696	4.08759	4.47714	2.19369	7.80117	5.59532	7.49441	10.3809	2.12539	1.53326	1.12701	0.314197	2.66721	2.46793	2.23064	1.21695	7.14497	4.42009	6.87334	7.67706	2.00526	1.26799	0.985904	0.252415	2.58208	2.08652	2.01217	0.996166	8.14933	5.20068	7.24409	9.14212	NA	NA
dd_Smed_v6_10336_0_1	2601	-0.801222	2.67317	2.51429	0.112818	0.215435	-0.184399	2.67317	0.1361	0.712189	0.83587	4.1284	1.86019	6.76876	4.92244	9.58469	3.24188	5.99419	8.26853	6.87167	7.40415	5.89777	10.6168	1.26743	0.659824	1.98995	1.68227	2.92691	1.22737	1.87272	2.87633	3.94654	3.66771	3.39181	4.92344	1.19579	0.545667	1.7408	1.35148	2.83349	1.03768	1.68931	2.3545	4.5013	4.31543	3.57477	5.86301	NA	NA
dd_Smed_v6_10337_0_1	2279	-0.79574	2.1965	1.0323	0.30962	0.463971	-0.247624	2.1965	0.101577	0.749946	0.859962	4.42632	0	4.61794	3.81379	3.51439	3.66474	5.21716	6.41233	6.14135	5.04061	7.78767	3.37043	1.55089	0	1.54945	1.48753	1.22483	1.5835	1.86026	2.54579	4.02545	2.8497	5.11149	1.78383	1.46323	0	1.35545	1.19503	1.18574	1.33877	1.67807	2.08392	4.5913	3.35296	5.3872	2.12425	NA	NA
dd_Smed_v6_10338_0_1	2920	-2.75008	1.16523	5.83997	0.0156661	0.0417085	-0.969641	1.16523	0.821383	0.364776	0.554415	2.04292	0	0.189778	0.0443463	1.41488	2.81903	3.3301	0.379677	3.28645	4.67884	3.06293	4.55008	0.558665	0	0.0496977	0.0134999	0.384866	0.950682	0.926739	0.117648	1.68128	2.0645	1.56906	1.87953	0.527088	0	0.0434754	0.0108453	0.372582	0.803758	0.835976	0.0963035	1.91761	2.4291	1.65369	2.23821	Contig4647	-0.120116
dd_Smed_v6_10339_0_1	3001	-1.187	2.6373	7.7973	0.00523243	0.0161763	-2.28922	2.6373	26.7842	2.27e-07	1.99e-06	5.5329	4.62389	4.30164	5.18852	2.23643	2.77204	1.99806	2.15151	10.0585	11.9383	8.40677	14.3917	1.47221	1.42152	1.09608	1.53685	0.591917	0.909605	0.541035	0.648675	5.00683	5.1255	4.19032	5.78442	1.389	1.17558	0.958844	1.23465	0.573024	0.769029	0.488047	0.53099	5.71064	6.03067	4.41635	6.8883	Contig5238	-0.0664118
dd_Smed_v6_1034_0_1	2381	0.515418	7.36068	4.26052	0.039008	0.0902287	0.306281	7.36068	1.50958	0.219204	0.390807	226.083	162.687	173.078	206.787	178.64	167.074	176.569	142.674	140.155	134.601	145.783	117.223	75.8213	63.0383	55.5847	77.2003	59.5926	69.0986	60.2614	54.2172	87.9317	72.8366	91.5863	59.3839	71.5358	52.1319	48.6252	62.02	57.6905	58.4197	54.3595	44.3809	100.292	85.6997	96.5265	70.7164	Contig1246	0.305095
dd_Smed_v6_10340_0_1	3528	-0.201521	3.1706	0.214673	0.643129	0.765502	-0.437053	3.1706	1.00706	0.315609	0.505281	9.61874	16.7417	4.9975	4.34594	9.35648	5.77901	7.51123	7.67792	8.99624	11.0942	9.64498	11.3246	2.17707	4.37807	1.08317	1.09499	2.10647	1.61303	1.73008	1.96909	3.80914	4.0516	4.08937	3.87176	2.05402	3.62061	0.947553	0.879677	2.03924	1.36375	1.56064	1.61185	4.34459	4.76712	4.30996	4.61064	Contig5748	-0.345218
dd_Smed_v6_10341_0_1	1329	-0.937832	1.21966	1.53502	0.215361	0.355042	-0.426795	1.21966	0.325559	0.568286	0.733373	2.3834	0.318889	2.53038	0.975619	2.14514	3.00696	2.22007	1.47652	1.9254	3.71413	3.38878	2.86486	1.43204	0.221374	1.45591	0.652545	1.28205	2.22804	1.35745	1.00523	2.16416	3.60075	3.81419	2.60011	1.3511	0.183074	1.27362	0.524232	1.24113	1.8837	1.2245	0.822859	2.46838	4.23665	4.01993	3.09631	NA	NA
dd_Smed_v6_10342_0_1	1810	-10.2037	1.05322	38.0208	7e-10	7.35e-09	-5.18778	1.05322	19.3209	1.1e-05	7.02e-05	0	0	0	0	0.273848	0	0.33301	0	5.94217	5.95708	6.64721	4.51637	0	0	0	0	0.120172	0	0.149507	0	4.90412	4.24048	5.49345	3.00971	0	0	0	0	0.116336	0	0.134865	0	5.59349	4.98936	5.78977	3.58407	Contig3424	0.139807
dd_Smed_v6_10343_0_1	1664	0.943217	3.78431	6.22202	0.0126171	0.0344785	0.393896	3.78431	1.09757	0.294801	0.482254	14.0876	19.718	17.5229	23.3262	13.5098	12.6856	18.7226	6.07484	11.652	10.9977	10.427	5.72973	6.76032	10.9325	8.05239	12.4608	6.44865	7.50719	9.14313	3.30318	10.4602	8.51547	9.37326	4.15331	6.37822	9.04108	7.0442	10.0106	6.24283	6.34698	8.24767	2.70391	11.9306	10.0193	9.87885	4.94591	Contig6865	0.461473
dd_Smed_v6_10346_0_1	1414	-2.9859	1.73504	8.15784	0.00428754	0.0136041	-3.71841	1.73504	11.8357	0.000581055	0.00259176	1.23426	2.44482	0.379557	0	0.730262	0	1.14704	0.548423	7.70158	9.3818	6.84272	8.35866	0.697014	1.59518	0.205258	0	0.410205	0	0.659189	0.350927	8.13627	8.54864	7.23875	7.13018	0.657617	1.31919	0.179559	0	0.397112	0	0.594629	0.287261	9.27998	10.0583	7.62921	8.49088	NA	NA
dd_Smed_v6_10347_0_1	1722	-0.479734	2.44172	0.605717	0.436405	0.591151	0.0459197	2.44172	0.0056046	0.940323	0.969574	5.91595	0.637778	3.28949	6.87368	4.79234	5.49711	5.77218	8.0576	3.7512	8.9718	7.52699	3.10079	2.74331	0.341703	1.46072	3.54823	2.21048	3.14355	2.72389	4.23373	3.25411	6.71285	6.53842	2.17197	2.58825	0.282584	1.27784	2.85052	2.13993	2.65772	2.45711	3.46563	3.71153	7.89835	6.8911	2.58645	Contig3779	-0.33548
dd_Smed_v6_10348_0_1	1384	0.590648	2.31338	0.998022	0.31779	0.473137	0.317397	2.31338	0.289752	0.590379	0.750094	5.83083	8.02537	7.40136	2.35036	5.61389	2.16126	7.88125	3.83896	3.7844	4.31708	5.93036	1.61781	3.36416	5.34985	4.08929	1.50957	3.22181	1.53776	4.62745	2.50974	4.08465	4.01896	6.40957	1.40995	3.17402	4.42426	3.57729	1.21273	3.11897	1.30011	4.17424	2.05441	4.65883	4.72872	6.75531	1.67902	Contig2725	0.139678
dd_Smed_v6_10349_0_1	1087	0.32978	2.37585	0.395598	0.529371	0.673624	0.389563	2.37585	0.553715	0.456804	0.639694	3.95815	7.06871	6.45247	4.16856	5.65953	5.77901	5.06916	6.03265	1.59343	4.02766	7.2989	4.28044	2.90768	5.9996	4.53909	3.40888	4.13545	5.23531	3.78956	5.02145	2.18977	4.77402	10.0441	4.74977	2.74333	4.9616	3.97078	2.73857	4.00345	4.42621	3.41842	4.11044	2.49758	5.61712	10.5859	5.6562	Contig2464	-0.0388293
dd_Smed_v6_1035_1_1	5651	0.0283867	6.72957	0.0141189	0.905416	0.943112	-0.0331976	6.72957	0.0193201	0.889453	0.942767	106.019	111.93	114.373	100.711	113.236	101.015	98.8301	101.838	120.238	101.946	113.85	88.5411	14.981	18.274	15.4764	15.8418	15.9159	17.6027	14.2117	16.3055	31.7841	23.2436	30.1364	18.8987	14.1343	15.1124	13.5387	12.7267	15.4079	14.8823	12.8198	13.3473	36.252	27.3485	31.762	22.5053	Contig4279	0.84262
dd_Smed_v6_10350_0_1	1010	-0.297425	4.05367	0.475836	0.490315	0.638966	-1.36245	4.05367	9.61236	0.00193272	0.00764245	15.7475	37.8947	7.14832	12.4613	5.93338	12.4977	10.8783	5.69516	22.1088	21.8748	21.0495	25.0086	12.4501	34.6153	5.41197	10.9673	4.66608	12.185	8.75233	5.10194	32.6994	27.905	31.1749	29.8663	11.7464	28.6265	4.73437	8.8107	4.51715	10.3019	7.89514	4.17633	37.2959	32.8331	32.8565	35.5658	NA	NA
dd_Smed_v6_10351_0_1	835	0.537827	0.892096	0.359393	0.548843	0.689782	0.824234	0.892096	0.842672	0.358634	0.549338	2.51109	2.71056	1.45497	0.665195	0.775903	2.25522	4.73615	1.18122	1.39425	1.20589	2.24832	0.202226	2.40137	2.99491	1.33242	0.708138	0.738062	2.65963	4.60916	1.27995	2.4943	1.86072	4.02769	0.292121	2.26564	2.47676	1.16559	0.568893	0.714505	2.2486	4.15774	1.04774	2.84493	2.18932	4.24495	0.347868	Contig2863	-0.221843
dd_Smed_v6_10352_0_1	1812	-2.45192	-0.214333	2.09775	0.147516	0.264976	-0.475961	-0.214333	0.0885563	0.766021	0.869855	0.680972	0	0.189778	0	1.68873	0	1.81306	0	0.597536	2.21883	0.782025	1.28076	0.300092	0	0.0800869	0	0.740243	0	0.813085	0	0.492607	1.57771	0.645575	0.852557	0.28313	0	0.0700597	0	0.716616	0	0.733452	0	0.561853	1.85633	0.680398	1.01526	NA	NA
dd_Smed_v6_10354_0_1	2011	0.777303	2.58925	2.74829	0.0973587	0.19091	0.315111	2.58925	0.454821	0.500054	0.678446	6.38412	13.0745	6.7055	4.74506	5.97902	4.79235	4.47714	7.17168	4.54792	4.94414	5.18092	3.33672	2.53497	5.99824	2.54972	2.09742	2.36151	2.34669	1.80914	3.22671	3.37828	3.16766	3.85371	2.00134	2.39168	4.96047	2.23048	1.68499	2.28614	1.98401	1.63195	2.64131	3.85316	3.72708	4.06158	2.38327	NA	NA
dd_Smed_v6_10355_0_1	1097	1.42681	5.0729	17.292	3.21e-05	0.00015955	1.16202	5.0729	11.6102	0.00065592	0.00288939	48.8598	45.176	33.401	55.3886	25.5135	47.5476	46.3994	32.7366	16.1335	16.2312	26.9799	8.662	35.5654	37.9938	23.2823	44.8816	18.4729	42.6816	34.3707	27.0009	21.9693	19.0636	36.789	9.52412	33.5552	31.4204	20.3672	36.0563	17.8833	36.0853	31.0045	22.1023	25.0575	22.4303	38.7734	11.3417	NA	NA
dd_Smed_v6_10356_0_1	1706	2.43281	3.92746	36.7199	1.36e-09	1.39e-08	1.89375	3.92746	23.0332	1.59e-06	1.19e-05	23.7489	35.5561	12.3356	25.3661	13.1904	18.3707	20.2766	14.934	5.94217	2.84589	6.22362	2.96598	11.116	19.2286	5.52909	13.2169	6.14115	10.6039	9.65827	7.9204	5.20308	2.14931	5.45693	2.09702	10.4877	15.9018	4.83683	10.618	5.94513	8.96509	8.71235	6.48346	5.93447	2.52889	5.75128	2.4972	Contig2151	1.59492
dd_Smed_v6_10357_0_1	1819	0.783148	0.830017	0.448986	0.502817	0.650483	-0.733386	0.830017	0.392258	0.531115	0.704862	4.68169	4.78334	0.759114	0.354771	0.136924	0	3.0711	0.46405	2.35695	1.25412	1.82473	0.70779	2.05519	2.42611	0.319115	0.173369	0.0597887	0	1.37197	0.230825	1.93558	0.888316	1.50055	0.469337	1.93903	2.00636	0.27916	0.139278	0.0578804	0	1.2376	0.188948	2.20767	1.04519	1.58149	0.558903	NA	NA
dd_Smed_v6_10359_0_1	1517	3.58527	4.04682	106.864	4.77e-25	1.83e-23	3.92093	4.04682	124.742	5.8e-29	3.07e-27	22.0465	18.655	27.7709	15.7873	25.1028	34.1572	25.3828	21.6416	1.39425	1.66412	1.95506	1.98855	11.6048	11.3455	13.9984	9.25076	13.1434	22.1726	13.5968	12.9079	1.37294	1.41338	1.92779	1.58112	10.9489	9.38256	12.2457	7.43173	12.7239	18.7459	12.2651	10.5661	1.56593	1.66299	2.03177	1.88285	Contig1076	0.930377
dd_Smed_v6_1036_0_1	856	0.138268	6.74774	0.27929	0.597167	0.729371	0.157799	6.74774	0.363965	0.546312	0.716194	92.9953	102.151	142.966	102.928	120.584	97.0685	106.933	122.383	81.1322	92.2504	98.4048	128.885	86.7502	110.098	127.712	106.884	111.89	111.667	101.513	129.359	141.584	138.853	171.96	181.611	81.8469	91.0499	111.722	85.8671	108.318	94.409	91.571	105.89	161.486	163.374	181.235	216.269	Contig3249	0.112156
dd_Smed_v6_10360_0_1	1419	0.599264	4.03412	2.29363	0.129906	0.240649	0.273991	4.03412	0.481925	0.487552	0.667272	9.8741	32.6861	15.6883	21.3749	11.7298	11.558	13.6164	26.6196	13.4446	9.16474	16.0967	13.8525	5.55646	21.2517	8.4541	13.3899	6.5657	8.02084	7.79764	16.9734	14.1533	8.32143	16.9683	11.7749	5.2424	17.5749	7.39561	10.757	6.35614	6.78125	7.03395	13.8941	16.1429	9.79101	17.8836	14.022	NA	NA
dd_Smed_v6_10361_0_1	1486	1.33087	2.96185	6.69348	0.00967662	0.0274362	0.909029	2.96185	3.17128	0.0749438	0.171539	12.598	8.07852	5.69335	16.8073	2.28207	11.699	11.7294	6.53889	3.35284	4.99237	4.23597	4.58378	6.76964	5.01563	2.92969	10.0539	1.21978	7.7526	6.41414	3.9814	3.37046	4.32861	4.26401	3.72065	6.38701	4.14786	2.56288	8.07692	1.18085	6.55447	5.78595	3.25908	3.84424	5.09305	4.49401	4.43068	NA	NA
dd_Smed_v6_10362_1_1	1502	0.0307192	2.63229	0.00316415	0.955142	0.974202	-0.103466	2.63229	0.0359362	0.849647	0.920113	5.06473	11.5863	3.66905	5.09983	6.25287	1.50348	6.3642	9.02788	7.46921	6.72885	4.88766	5.79714	2.69259	7.11684	1.86791	3.01815	3.3066	0.985705	3.44315	5.43835	7.42847	5.77206	4.8676	4.6554	2.5404	5.88554	1.63404	2.42467	3.20106	0.833368	3.10594	4.4517	8.47268	6.79142	5.13016	5.54381	NA	NA
dd_Smed_v6_10363_0_1	571	-10.5361	1.33581	54.889	1.28e-13	2.02e-12	-10.5361	1.33581	56.9871	4.39e-14	8.7e-13	0	0	0	0	0	0	0	0	7.27003	7.76591	9.25396	4.7523	0	0	0	0	0	0	0	0	19.0193	17.5233	24.2424	10.0388	0	0	0	0	0	0	0	0	21.6928	20.618	25.5501	11.9545	NA	NA
dd_Smed_v6_10364_0_1	900	6.03157	3.16969	46.8352	7.72e-12	1.02e-10	5.33931	3.16969	38.9385	4.37e-10	5.63e-09	24.6427	9.19463	16.0679	15.6986	19.6258	4.74536	7.58524	8.64821	0.663929	0	0	0.337043	21.864	9.42549	13.6518	15.5051	17.3203	5.19213	6.84872	8.6943	1.10198	0	0	0.451706	20.6282	7.79477	11.9425	12.4562	16.7675	4.38971	6.17796	7.11695	1.25689	0	0	0.537908	NA	NA
dd_Smed_v6_10365_0_1	1048	0.729889	3.35171	2.15451	0.142151	0.257701	1.00901	3.35171	4.09217	0.0430823	0.109697	8.34191	2.65741	12.5254	19.6454	8.85443	9.5847	13.5794	20.376	4.97947	6.22238	8.86295	5.96566	6.35605	2.33943	9.13907	16.6631	6.71075	9.00608	10.5294	17.5917	7.09768	7.64989	12.6503	6.8661	5.9968	1.93468	7.99482	13.3865	6.49656	7.61422	9.49815	14.4002	8.0954	9.00088	13.3327	8.1764	NA	NA
dd_Smed_v6_10368_0_1	666	-0.466533	2.5991	0.683143	0.408507	0.565512	-0.0719768	2.5991	0.016426	0.898019	0.947272	8.46959	4.19871	5.63009	1.10866	7.21134	2.63109	9.28729	6.37014	6.40692	6.07767	7.39665	6.94308	10.1548	5.81639	6.46419	1.47972	8.6003	3.89028	11.3318	8.65418	14.3704	11.7577	16.6129	12.5745	9.58084	4.81008	5.65485	1.18875	8.32579	3.28905	10.2219	7.08411	16.3905	13.8342	17.509	14.9742	Contig3146	-0.211658
dd_Smed_v6_10369_0_1	6670	-1.15548	4.20227	11.4688	0.000707743	0.00268232	-1.06499	4.20227	9.81044	0.00173524	0.00691989	14.8537	5.63371	15.6883	15.0334	15.5181	13.9072	13.1354	11.9809	25.0633	30.0266	23.2978	35.7265	1.77825	0.779257	1.79856	2.00349	1.84792	2.05321	1.6003	1.62523	5.61316	5.80017	5.22485	6.46068	1.67774	0.644436	1.57337	1.60953	1.78894	1.73589	1.44357	1.33038	6.4022	6.82449	5.50668	7.69361	PL06016B2C04	-0.0279248
dd_Smed_v6_1037_0_1	1077	2.64599	7.00811	92.4455	6.92e-22	2.2e-20	2.4488	7.00811	80.4099	3.04e-19	9.3e-18	166.966	183.521	201.671	207.63	151.392	161.718	146.303	203.296	21.1793	33.1378	33.3664	33.6706	123.793	157.21	143.186	171.368	111.65	147.864	110.387	170.791	29.3759	39.6431	46.3423	37.7093	116.796	130.011	125.259	137.671	108.087	125.012	99.5761	139.805	33.5053	46.6442	48.8421	44.9055	Contig5808	2.48048
dd_Smed_v6_10370_0_1	1134	0.113179	0.937495	0.0213347	0.883871	0.928991	0.999857	0.937495	1.66038	0.197552	0.361269	1.27682	1.70074	1.26519	1.59647	1.14103	4.18156	4.18113	1.30778	0.763519	1.56765	2.05282	1.01113	0.899086	1.38369	0.85313	1.25142	0.799204	3.63115	2.99615	1.04345	1.00578	1.78114	2.70783	1.07549	0.848267	1.14429	0.746315	1.00534	0.773695	3.06997	2.70271	0.854144	1.14716	2.09569	2.85389	1.28073	Contig2815	-0.238445
dd_Smed_v6_10370_1_1	864	-0.194756	-0.133854	0.0205144	0.88611	0.930674	-1.42484	-0.133854	1.04861	0.305827	0.49499	0.297925	0	0.506076	3.0599	0.867186	0.704757	0.0740023	0	0.597536	1.18177	1.17304	1.48299	0.275345	0	0.447893	3.1481	0.797206	0.803239	0.0696008	0	1.03311	1.7623	2.03087	2.07032	0.259782	0	0.391815	2.52907	0.771761	0.679101	0.0627842	0	1.17833	2.07352	2.14042	2.46541	NA	NA
dd_Smed_v6_10371_0_1	859	-5.84804	0.86434	17.7468	2.52e-05	0.000127933	-5.00254	0.86434	14.5036	0.000139889	0.00070785	0.0851216	0	0.253038	0	0.182565	0.422854	0	0	3.7512	5.18532	5.80002	4.95453	0.0791279	0	0.22525	0	0.16881	0.484748	0	0	6.52337	7.77754	10.1	6.95701	0.0746554	0	0.197048	0	0.163422	0.409832	0	0	7.44035	9.15107	10.6448	8.28465	NA	NA
dd_Smed_v6_10372_0_1	1946	-1.5067	1.22371	1.93348	0.164378	0.288479	-2.58634	1.22371	5.27357	0.0216516	0.0620182	1.78755	2.12593	2.3406	0	0.638979	1.4565	0.851026	0	3.22006	4.0759	5.93036	4.55008	0.733499	1.0079	0.919723	0	0.260805	0.737031	0.355372	0	2.47181	2.69861	4.5585	2.82026	0.69204	0.833522	0.80457	0	0.252481	0.623126	0.320567	0	2.81927	3.17519	4.80439	3.35847	Contig2583	-0.186854
dd_Smed_v6_10373_0_1	1909	0.956926	2.22417	3.22967	0.0723151	0.150377	1.34346	2.22417	6.30869	0.0120147	0.0374615	4.76681	5.8463	4.23838	4.70071	2.78412	8.55105	6.5122	7.72011	3.7512	2.43589	1.88989	1.98855	1.99391	2.82545	1.69772	2.18883	1.15839	4.41095	2.77207	3.65905	2.93534	1.64404	1.48087	1.25645	1.88121	2.33661	1.48516	1.75843	1.12142	3.72926	2.50058	2.99521	3.34796	1.93438	1.56075	1.49622	NA	NA
dd_Smed_v6_10374_0_1	3407	4.93731	5.09053	158.187	2.82e-36	1.98e-34	4.88938	5.09053	155.82	9.27e-36	7.04e-34	56.1802	21.525	53.3277	72.9941	44.5916	46.9368	47.3985	58.4703	1.19507	1.64001	2.02023	1.78633	13.1672	5.82886	11.9689	19.0445	10.3957	13.5663	11.3051	15.528	0.523983	0.620203	0.886979	0.632415	12.423	4.82039	10.4703	15.2997	10.0639	11.4696	10.1979	12.7108	0.597639	0.729732	0.934823	0.753102	NA	NA
dd_Smed_v6_10375_0_1	2285	-2.39502	1.39218	4.54271	0.0330591	0.0785573	-3.77224	1.39218	9.93102	0.00162516	0.00650858	1.14914	2.87	0.316297	0.221732	1.09539	0.657773	0	0	8.09994	5.86061	5.40901	4.68489	0.401578	1.1588	0.105848	0.0862575	0.380764	0.283471	0	0	5.2953	3.30459	3.54092	2.47302	0.37888	0.958313	0.0925953	0.0692962	0.368611	0.239662	0	0	6.03965	3.88818	3.73192	2.94496	NA	NA
dd_Smed_v6_10376_0_1	1270	-1.645	2.5192	4.54678	0.0329807	0.0783994	-1.15536	2.5192	2.31155	0.128416	0.259958	3.48998	4.46445	4.30164	0	4.83798	4.04061	6.3642	1.94057	8.13314	8.36886	10.7528	11.055	2.19433	3.24322	2.59002	0	3.02575	3.13301	4.07214	1.38254	9.56641	8.49029	12.665	10.4995	2.07031	2.6821	2.26574	0	2.92917	2.64881	3.67332	1.13171	10.9112	9.98969	13.3481	12.5032	NA	NA
dd_Smed_v6_10377_0_1	3988	0.00590703	3.8203	0.000305844	0.986047	0.992989	-0.203859	3.8203	0.364171	0.546199	0.716194	14.5132	18.2298	16.0046	10.1997	14.514	12.9205	6.99322	16.5371	16.3991	13.2889	15.5102	13.4817	2.90598	4.21735	3.06876	2.27345	2.8907	3.1904	1.42497	3.75192	6.14269	4.29332	5.81762	4.07759	2.74172	3.4877	2.68454	1.82641	2.79843	2.69733	1.28541	3.07124	7.00616	5.05153	6.13143	4.85574	NA	NA
dd_Smed_v6_10378_0_1	2392	-0.92655	2.56544	2.29948	0.129417	0.239931	-0.0679986	2.56544	0.0127113	0.910233	0.953799	4.97961	4.14556	5.12402	0.620849	12.2775	2.95998	7.10422	4.59831	9.49419	4.84767	6.22362	7.68457	1.66233	1.59895	1.63803	0.230717	4.07682	1.21856	2.41345	1.73936	5.92914	2.61115	3.89194	3.875	1.56837	1.32231	1.43294	0.18535	3.9467	1.03023	2.17708	1.4238	6.76259	3.07228	4.10187	4.61449	NA	NA
dd_Smed_v6_10379_0_1	2091	-0.702383	3.02874	2.81776	0.0932263	0.184459	-0.0258682	3.02874	0.00389796	0.950217	0.975923	8.00143	5.47426	3.16297	6.25283	13.9663	6.43678	6.84521	9.44975	7.93396	10.3706	8.86295	10.1787	3.0556	2.41537	1.15668	2.65814	5.30515	3.03133	2.66021	4.089	5.66801	6.39015	6.34028	5.87153	2.88289	1.99748	1.01186	2.13546	5.13582	2.56285	2.39967	3.34716	6.46476	7.51867	6.68228	6.99203	Contig3208	-0.314219
dd_Smed_v6_1038_0_1	940	-0.341633	6.82408	1.70759	0.191298	0.324318	-0.0119073	6.82408	0.00208194	0.963607	0.982236	83.8873	96.9954	108.11	96.5863	130.397	102.284	95.907	155.963	129.167	93.0221	130.338	136.064	71.2609	95.1997	87.9453	91.3362	110.183	107.151	82.9096	150.122	205.267	127.502	207.408	174.594	67.2331	78.729	76.9342	73.3763	106.666	90.5915	74.7896	122.886	234.122	150.02	218.596	207.913	Contig1400	-1.42118
dd_Smed_v6_10380_0_1	3931	-10.1274	1.22228	37.9025	7.44e-10	7.77e-09	-2.13981	1.22228	4.49943	0.0339061	0.0900143	0	0	0	0	1.46052	1.97332	1.51705	0	6.37372	5.42649	4.00788	6.06677	0	0	0	0	0.295106	0.494326	0.313602	0	2.42206	1.77859	1.52509	1.86152	0	0	0	0	0.285687	0.417929	0.282888	0	2.76253	2.0927	1.60736	2.21677	NA	NA
dd_Smed_v6_10381_0_1	440	1.02264	2.51066	3.9742	0.0462024	0.103693	1.01567	2.51066	3.92991	0.0474344	0.118527	4.29864	4.83648	8.35025	9.6675	5.43132	8.92692	5.99419	6.66545	1.8922	2.87001	5.99553	2.59523	7.8012	10.1412	14.5117	19.5307	9.80449	19.9787	11.0703	13.7065	6.42405	8.4041	20.3826	7.11437	7.36026	8.38665	12.6948	15.6902	9.49155	16.8911	9.98611	11.2198	7.32707	9.88828	21.482	8.47205	Contig7245	0.156508
dd_Smed_v6_10382_0_1	1820	1.68832	3.65387	23.7706	1.09e-06	7.24e-06	1.4789	3.65387	18.4428	1.75e-05	0.000106426	15.6198	13.9248	18.2187	21.2862	15.1529	16.8202	17.2425	10.5044	7.23683	4.00355	4.43148	5.76343	6.85311	7.05879	7.65454	10.3964	6.61298	9.10078	7.69861	5.22217	5.9398	2.83422	3.64218	3.81964	6.46575	5.83754	6.69616	8.35209	6.40191	7.69429	6.94462	4.27475	6.77475	3.33475	3.83864	4.54857	NA	NA
dd_Smed_v6_10386_0_1	874	-2.45462	0.582388	3.02378	0.0820522	0.16641	-1.32254	0.582388	0.957135	0.32791	0.518217	0	0	1.96104	0	1.96258	0.516822	1.44304	0.337491	2.29056	3.69002	2.41124	2.29189	0	0	1.71573	0	1.78356	0.582302	1.34169	0.349383	3.91493	5.43972	4.12681	3.16297	0	0	1.50091	0	1.72663	0.492309	1.21028	0.285997	4.46525	6.40039	4.34941	3.76658	Contig3345	-0.194732
dd_Smed_v6_10388_0_1	1281	-0.369452	4.36971	1.29775	0.254624	0.402205	-0.647899	4.36971	3.97119	0.046285	0.116186	16.5987	12.2241	31.3767	19.1576	14.2857	13.8132	16.8725	20.376	18.9552	26.7707	28.3484	28.3453	10.3469	8.80398	18.7297	13.2938	8.8578	10.6186	10.7032	14.392	22.1041	26.9259	33.1027	26.6898	9.76203	7.28079	16.3847	10.6797	8.57508	8.97749	9.65494	11.781	25.2113	31.6811	34.8883	31.7832	Contig1742	-0.171456
dd_Smed_v6_10389_0_1	709	1.21498	1.81189	2.247	0.133874	0.24616	-0.52498	1.81189	0.424011	0.514942	0.691291	2.51109	5.20852	3.35275	12.7717	0.730262	4.83933	0.814025	0.759355	1.16188	4.67884	1.01012	3.40413	2.82812	6.77767	3.616	16.0125	0.818096	6.72137	0.932984	0.969057	2.44798	8.50261	2.13113	5.79126	2.66827	5.60505	3.16326	12.8639	0.791984	5.68261	0.841609	0.793247	2.79209	10.0042	2.24608	6.89645	NA	NA
dd_Smed_v6_1039_0_1	1154	-0.632537	6.66059	5.33337	0.0209209	0.0533107	-0.981885	6.66059	12.7109	0.000363528	0.00168858	105.423	70.315	116.461	71.5306	84.2996	61.2669	78.8495	61.0437	120.636	158.237	123.299	161.646	72.9479	56.2153	77.1696	55.0987	58.0219	52.2804	55.5233	47.8614	156.159	176.669	159.823	168.955	68.8248	46.4894	67.5076	44.2643	56.1699	44.2006	50.0855	39.1783	178.11	207.869	168.444	201.198	Contig651	1.54665
dd_Smed_v6_10390_0_1	2598	-1.68912	2.28068	3.19888	0.0736886	0.152557	-1.66852	2.28068	3.13244	0.0767489	0.175	2.68133	3.13574	5.12402	0	3.74259	3.80569	3.40411	0.126559	9.79296	6.10179	5.37642	13.9873	0.824127	1.11356	1.50815	0	1.14421	1.44249	1.06475	0.0440763	5.63079	3.02606	3.09556	6.49392	0.777546	0.9209	1.31932	0	1.10769	1.21956	0.960468	0.0360798	6.42231	3.56047	3.26253	7.7332	NA	NA
dd_Smed_v6_10391_0_1	2077	-1.18695	1.10716	1.63608	0.200865	0.336165	0.500215	1.10716	0.3019	0.582694	0.745013	2.12804	0	0.695854	0.975619	3.46874	3.61775	0.999031	4.26082	2.25736	2.24295	2.80226	1.41558	0.818138	0	0.256185	0.417541	1.3265	1.71523	0.390864	1.85613	1.62353	1.39137	2.01816	0.822074	0.771895	0	0.22411	0.335438	1.28416	1.45014	0.352583	1.51938	1.85174	1.63709	2.12702	0.978956	NA	NA
dd_Smed_v6_10394_0_1	1942	-2.06786	1.41443	3.39572	0.0653659	0.138625	-2.63918	1.41443	5.28891	0.0214616	0.0615545	3.91559	0	1.32845	0	0.684621	1.59745	0.703022	0.548423	5.51061	5.11296	5.57193	5.89825	1.61002	0	0.52308	0	0.280009	0.810022	0.294173	0.255515	4.23882	3.39222	4.29181	3.66342	1.51902	0	0.457588	0	0.271072	0.684836	0.265362	0.209159	4.83467	3.99129	4.52331	4.36254	NA	NA
dd_Smed_v6_10395_0_1	947	4.73523	3.90861	128.072	1.08e-29	5.32e-28	4.51714	3.90861	118.672	1.24e-27	6.01e-26	23.5361	29.2846	28.4668	13.3482	21.0863	18.2297	20.6466	21.3463	0.398358	1.15765	0.912363	1.04483	19.8458	28.53	22.9859	12.5294	17.6857	18.9561	17.7167	20.395	0.628373	1.57503	1.44113	1.33079	18.724	23.594	20.1079	10.0657	17.1212	16.0265	15.9815	16.6949	0.716703	1.85318	1.51886	1.58475	NA	NA
dd_Smed_v6_10396_0_1	1553	-5.83811	2.0277	18.2874	1.9e-05	9.86e-05	-5.11424	2.0277	15.148	9.94e-05	0.000520647	0.638412	0	0.126519	0	0.182565	1.12761	0	0	10.1913	11.48	11.0787	12.875	0.328256	0	0.0622955	0	0.0933725	0.715001	0	0	9.80288	9.52428	10.6709	9.99977	0.309702	0	0.0544959	0	0.0903923	0.6045	0	0	11.1809	11.2063	11.2465	11.9081	NA	NA
dd_Smed_v6_10397_0_1	1041	1.62781	4.87701	30.2104	3.88e-08	3.24e-07	1.29147	4.87701	19.3322	1.1e-05	6.99e-05	31.1971	44.1661	41.2452	49.6679	32.4967	29.6468	23.8657	45.6878	15.8015	9.81592	14.0439	14.1558	23.9302	39.1427	30.2967	42.4112	24.7948	28.0444	18.6297	39.7101	22.6748	12.149	20.18	16.402	22.5776	32.3705	26.5034	34.0716	24.0034	23.7102	16.8052	32.5057	25.8621	14.2945	21.2685	19.5321	Contig6707	0.530233
dd_Smed_v6_10398_0_1	3034	-0.192605	2.62367	0.128707	0.719776	0.82101	-0.0576037	2.62367	0.0115557	0.914394	0.9561	3.91559	10.2576	1.77127	6.56326	3.65131	10.4774	5.51317	5.10455	6.20774	6.34297	6.35395	6.84197	1.03054	3.11919	0.446417	1.92291	0.955884	3.40061	1.47662	1.52227	3.05642	2.69362	3.13266	2.72006	0.972292	2.57954	0.390524	1.5448	0.925374	2.87505	1.332	1.2461	3.48606	3.16932	3.30163	3.23915	PL06016B1G02	-0.119847
dd_Smed_v6_10399_0_1	1399	-0.594991	1.66203	0.404526	0.524761	0.669444	-0.827192	1.66203	0.776833	0.378112	0.568617	0.680972	3.45463	1.58149	5.27721	1.78001	5.59107	1.99806	0	4.81349	4.51002	4.33372	2.96598	0.388683	2.27822	0.864411	3.35307	1.0106	3.93547	1.16058	0	5.13969	4.15356	4.6337	2.55719	0.366713	1.88406	0.756184	2.69373	0.97834	3.32725	1.04691	0	5.86217	4.88709	4.88364	3.0452	Contig1953	-0.162007
dd_Smed_v6_104_0_1	906	0.919514	9.64583	10.7782	0.00102702	0.00377474	0.763463	9.64583	7.46838	0.0062792	0.0214466	971.365	753.482	1183.96	1053.14	921.819	765.225	1000.99	867.689	491.706	484.357	513.465	605.093	856.125	767.285	999.27	1033.27	808.145	831.725	897.811	866.537	810.722	688.807	847.748	805.577	807.735	634.535	874.158	830.088	782.351	703.185	809.881	709.326	924.685	810.451	893.476	959.31	Contig405	1.785
dd_Smed_v6_1040_0_1	761	-1.69142	6.29567	31.2762	2.24e-08	1.94e-07	-1.29204	6.29567	18.6835	1.54e-05	9.49e-05	57.4571	52.8293	35.1723	24.2131	69.238	56.9914	54.9097	42.6926	133.782	121.047	154.189	139.098	60.2895	64.0475	35.3418	28.2827	72.2656	73.7468	58.6337	50.7597	262.607	204.941	303.078	220.469	56.8818	52.9665	30.9168	22.7213	69.959	62.3495	52.8912	41.5507	299.522	241.134	319.426	262.543	Contig1473	-1.88087
dd_Smed_v6_10400_0_1	1048	-0.199023	1.73061	0.100675	0.751021	0.84291	-0.951621	1.73061	2.24998	0.133616	0.268048	1.91524	4.62389	1.45497	6.16414	2.32771	1.78538	2.81209	1.47652	3.718	4.63061	4.75732	3.1682	1.4593	4.0706	1.06161	5.22837	1.76417	1.6776	2.18047	1.27476	5.2996	5.69294	6.79024	3.6464	1.37682	3.36634	0.928692	4.20029	1.70786	1.41834	1.96692	1.04349	6.04456	6.69833	7.15651	4.34227	NA	NA
dd_Smed_v6_10402_0_1	2014	-1.04222	1.99134	1.45033	0.228474	0.370948	-0.777565	1.99134	0.817446	0.365928	0.555446	3.70279	0	5.3138	1.95124	2.96669	6.6717	1.85006	1.68746	8.79706	4.92002	5.76743	3.10079	1.46809	0	2.01752	0.861204	1.17	3.26209	0.746463	0.758095	6.52489	3.14751	4.28359	1.85706	1.38511	0	1.76492	0.691861	1.13265	2.75795	0.673356	0.620559	7.44209	3.70337	4.51465	2.21146	NA	NA
dd_Smed_v6_10403_0_1	724	-1.9775	1.6739	5.33887	0.020855	0.0531634	-1.51457	1.6739	3.23772	0.0719609	0.165838	3.91559	1.3287	0.569335	0.0443463	1.09539	2.58411	1.77606	2.65774	5.70979	6.8012	6.35395	4.34785	4.31859	1.69318	0.601315	0.0544471	1.20172	3.51472	1.99343	3.32143	11.7808	12.1034	13.1277	7.24352	4.07449	1.40024	0.526028	0.0437408	1.16336	2.97154	1.79819	2.71884	13.4369	14.2409	13.8359	8.62584	Contig179	-0.752013
dd_Smed_v6_10404_0_1	1130	-0.622957	2.62808	1.29816	0.25455	0.402185	0.367982	2.62808	0.46068	0.497307	0.675905	6.97997	2.49796	5.63009	1.06431	7.80467	6.9536	8.73227	8.64821	8.56469	3.76237	7.39665	5.19046	4.9324	2.03948	3.80987	0.837232	5.4859	6.05969	6.27959	6.92466	11.3221	4.28986	9.79132	5.54039	4.65361	1.68663	3.33286	0.672602	5.31081	5.12318	5.66458	5.66836	12.9137	5.04746	10.3195	6.5977	Contig97	0.00743164
dd_Smed_v6_10405_0_1	1220	-9.85285	0.835913	24.2839	8.31e-07	5.67e-06	-3.06065	0.835913	5.09255	0.0240288	0.0677925	0	0	0	0	1.73437	0.422854	0	0	3.58522	4.34119	2.67192	7.48235	0	0	0	0	1.12916	0.341311	0	0	4.38986	4.58469	3.27603	7.39761	0	0	0	0	1.09312	0.288562	0	0	5.00694	5.39435	3.45274	8.80934	NA	NA
dd_Smed_v6_10406_0_1	3994	-1.4935	2.49565	6.95864	0.00834153	0.0241088	-1.20464	2.49565	4.62151	0.0315734	0.0849557	5.74571	0.850371	4.49142	2.12862	2.46463	4.13457	5.95719	3.58584	9.49419	10.4189	9.28655	8.05532	1.14873	0.196432	0.859901	0.473747	0.490136	1.01939	1.21204	0.812333	3.55095	3.36103	3.47801	2.4327	1.0838	0.162447	0.752238	0.380591	0.474492	0.861849	1.09333	0.664956	4.0501	3.9546	3.66561	2.89694	PL06015B1E02	0.131001
dd_Smed_v6_10407_0_1	4982	-0.638382	5.36992	4.02543	0.0448191	0.101197	-0.604521	5.36992	3.61878	0.0571307	0.137878	33.4953	25.6706	56.4907	22.7497	41.7162	25.1363	41.4783	33.2429	49.4627	65.8656	41.7406	58.2073	5.36863	4.75383	8.67054	4.05907	6.65079	4.96841	6.7655	6.03734	14.831	17.0339	12.5325	14.0925	5.06519	3.93136	7.58495	3.26091	6.43851	4.20056	6.1029	4.94202	16.9157	20.0422	13.2086	16.7818	NA	NA
dd_Smed_v6_10408_0_1	1732	-0.157752	2.11188	0.081168	0.775721	0.860631	0.386608	2.11188	0.491079	0.483446	0.663934	3.06438	1.80704	4.3649	5.01114	3.37746	7.14154	4.36614	5.90609	5.04586	5.23355	2.60675	2.99968	1.41279	0.962568	1.92708	2.57184	1.54887	4.06034	2.04848	3.08534	4.35193	3.89322	2.25131	2.08901	1.33294	0.796032	1.6858	2.06612	1.49943	3.43283	1.84786	2.52559	4.96368	4.58077	2.37275	2.48767	NA	NA
dd_Smed_v6_10409_0_1	3494	-0.90363	1.71476	1.79578	0.180224	0.309791	-1.11366	1.71476	2.70881	0.0997953	0.216072	1.61731	5.58056	1.07541	1.99559	1.55181	3.52379	2.36807	1.43434	5.21185	6.3912	4.92024	2.69634	0.369618	1.47356	0.235355	0.507695	0.352766	0.993128	0.550751	0.371432	2.22825	2.35678	2.10643	0.930819	0.348727	1.21861	0.205888	0.407864	0.341506	0.839644	0.496811	0.304045	2.54147	2.773	2.22006	1.10845	Contig5998	0.146515
dd_Smed_v6_1041_0_1	423	-10.2389	5.44463	347.109	1.81e-77	3.39e-74	-13.0326	5.44463	394.424	9.01e-88	1.18e-83	0.0425608	0	0.442816	0	0	0	0	0.0421864	139.923	132.334	98.2419	150.321	0.0803438	0	0.80049	0	0	0	0	0.0902366	494.133	403.08	347.409	428.64	0.0758026	0	0.700265	0	0	0	0	0.0738656	563.593	474.265	366.148	510.44	PL04011A2G05	-2.21908
dd_Smed_v6_10410_0_1	956	-0.197791	0.478528	0.0300197	0.862445	0.915046	-0.56521	0.478528	0.243375	0.621779	0.773907	2.3834	0	0.632595	2.35036	1.55181	1.50348	1.07303	0.0421864	1.22827	2.55648	1.17304	1.21335	1.99078	0	0.505988	2.1854	1.28929	1.54867	0.912091	0.0399269	1.91925	3.44544	1.83543	1.53089	1.87826	0	0.442636	1.75567	1.24814	1.30933	0.822762	0.0326832	2.18903	4.05391	1.93444	1.82303	NA	NA
dd_Smed_v6_10411_0_1	1495	-0.634635	2.77353	0.745773	0.387818	0.544758	-0.165301	2.77353	0.0511246	0.821118	0.902968	5.19242	0	6.07291	9.31273	7.25698	7.28249	7.77024	6.2014	7.96715	6.22238	8.01576	9.77424	2.77339	0	3.10619	5.53721	3.85555	4.79687	4.22353	3.75318	7.9608	5.3626	8.02025	7.88597	2.61664	0	2.71728	4.4484	3.73249	4.05553	3.80989	3.07226	9.07984	6.30965	8.45286	9.3909	Contig47	0.100302
dd_Smed_v6_10412_0_1	987	0.707826	2.70667	2.21212	0.136931	0.250553	0.361543	2.70667	0.580781	0.446006	0.63004	8.98032	4.19871	10.248	8.86927	4.83798	5.35615	10.5823	4.59831	6.17454	4.65472	5.76743	3.1682	7.26538	3.92474	7.93955	7.98777	3.89331	5.34386	8.71258	4.21534	9.34507	6.07627	8.74077	3.87176	6.85472	3.24571	6.94549	6.41709	3.76905	4.51798	7.85928	3.45058	10.6587	7.14935	9.21226	4.61064	NA	NA
dd_Smed_v6_10413_0_1	563	8.45407	2.25113	90.9397	1.48e-21	4.62e-20	8.41298	2.25113	90.2431	2.11e-21	7.34e-20	8.42703	5.20852	6.64224	8.24842	8.85443	6.29583	9.25029	3.33272	0	0	0	0.0674085	11.9522	8.53529	9.02151	13.0232	12.4918	11.0119	13.3515	5.35601	0	0	0	0.144418	11.2767	7.05858	7.89198	10.4624	12.0931	9.31007	12.0439	4.38431	0	0	0	0.171978	NA	NA
dd_Smed_v6_10414_0_1	1502	1.38949	0.246319	1.65121	0.198795	0.333423	1.51953	0.246319	1.96733	0.160732	0.308681	1.36194	2.76371	0.569335	0.709541	0.684621	3.61775	1.07303	0.548423	0.431554	1.37471	0.130338	0.101113	0.724057	1.69759	0.289848	0.419917	0.362036	2.37185	0.580532	0.330367	0.4292	1.17924	0.129803	0.0811988	0.683132	1.40389	0.253558	0.337346	0.350481	2.00529	0.523675	0.270431	0.489533	1.38749	0.136804	0.0966944	NA	NA
dd_Smed_v6_10415_0_1	2052	-0.808188	1.76748	1.00438	0.316252	0.471545	0.082095	1.76748	0.0105961	0.918013	0.958294	2.93669	2.60426	3.03645	0.0886927	4.24465	0.892692	4.32913	6.58107	4.51472	2.62883	2.80226	5.22416	1.14279	1.1709	1.13152	0.0384207	1.64299	0.428394	1.71438	2.90182	3.28661	1.65062	2.04275	3.07081	1.07819	0.968319	0.989849	0.0308658	1.59055	0.362187	1.54647	2.37536	3.74861	1.94212	2.15294	3.65683	NA	NA
dd_Smed_v6_10417_0_1	2124	-0.851322	0.626315	0.690901	0.405858	0.562959	0.199589	0.626315	0.0389889	0.843471	0.916219	1.53219	0	1.39171	0.665195	0.775903	1.55047	1.33204	3.79677	0.630733	2.26707	2.47641	1.11224	0.576024	0	0.501033	0.278387	0.290152	0.71883	0.509619	1.61738	0.443594	1.37521	1.74403	0.631623	0.543466	0	0.438302	0.223647	0.280891	0.607738	0.459708	1.32395	0.50595	1.61808	1.8381	0.752159	NA	NA
dd_Smed_v6_10418_0_1	827	0.941764	0.788872	0.848159	0.357074	0.513523	0.819976	0.788872	0.645707	0.421652	0.608671	3.1495	0	1.96104	3.01555	0.638979	3.85267	1.55405	1.43434	1.26147	0.554708	1.33596	1.07854	3.04102	0	1.81324	3.24128	0.613696	4.58749	1.52701	1.56927	2.27858	0.86421	2.41642	1.57305	2.86913	0	1.58621	2.60393	0.594108	3.87851	1.37746	1.28456	2.59888	1.01683	2.54676	1.87325	NA	NA
dd_Smed_v6_10419_0_1	5011	1.11471	3.52449	8.1317	0.0043498	0.0137817	0.457191	3.52449	1.38839	0.238677	0.415899	20.9399	13.5528	14.866	16.0977	6.25287	16.5853	7.21522	11.4747	4.84668	6.72885	9.18879	9.4709	3.33683	2.49526	2.26852	2.85559	0.991121	3.25925	1.17006	2.07189	1.44482	1.73012	2.74295	2.27971	3.14822	2.06355	1.98449	2.29408	0.959487	2.75554	1.05547	1.696	1.64792	2.03566	2.89091	2.71476	NA	NA
dd_Smed_v6_10420_0_1	1283	-0.0251872	2.14649	0.00172745	0.966847	0.981796	0.218044	2.14649	0.129934	0.718501	0.840373	5.23498	0.637778	4.11187	6.29718	4.97491	3.85267	6.2902	4.17645	4.6807	4.43767	4.26855	3.20191	3.25815	0.458622	2.45067	4.36289	3.07986	2.95702	3.98401	2.94531	5.44978	4.45644	4.97667	3.0102	3.07399	0.379275	2.14384	3.50499	2.98155	2.50002	3.59382	2.41096	6.21585	5.24346	5.24511	3.58465	Contig3975	0.308116
dd_Smed_v6_10421_0_1	1037	-7.00699	1.80487	19.9428	7.98e-06	4.48e-05	-3.48928	1.80487	7.11969	0.00762418	0.0254385	0.255365	0	0	0	0	2.16126	0	1.13903	13.7101	5.04061	7.78767	10.6506	0.196637	0	0	0	0	2.05232	0	0.993821	19.7496	6.26274	11.2334	12.3882	0.185523	0	0	0	0	1.73515	0	0.813518	22.5258	7.36875	11.8394	14.7523	Contig5950	-0.695393
dd_Smed_v6_10422_0_1	2122	0.212671	2.919	0.270584	0.60294	0.734101	-0.126547	2.919	0.0957477	0.756994	0.864308	4.85193	10.3639	8.54003	10.111	7.02877	8.64502	5.73518	5.35767	6.6061	6.05355	9.61239	6.94308	1.8258	4.50598	3.07742	4.23548	2.63091	4.0118	2.19626	2.28445	4.65044	3.67557	6.77595	3.94657	1.7226	3.7264	2.69211	3.40263	2.54694	3.39179	1.98116	1.87	5.30415	4.32469	7.14145	4.69972	NA	NA
dd_Smed_v6_10424_0_1	1744	1.17837	0.670742	1.22079	0.269206	0.418396	0.642144	0.670742	0.368174	0.544002	0.714815	2.08548	0	1.07541	5.36591	2.23643	0.845708	1.36904	1.43434	0.398358	1.23001	0.684272	1.44928	0.954866	0	0.471521	2.73497	1.01854	0.477522	0.637901	0.744141	0.34121	0.9087	0.586903	1.00235	0.900895	0	0.412484	2.19717	0.986035	0.403722	0.575426	0.609137	0.389173	1.06918	0.618561	1.19364	Contig1913	-0.115085
dd_Smed_v6_10425_0_1	14125	-1.07045	2.50135	2.36811	0.123837	0.231985	-1.96607	2.50135	7.58178	0.00589612	0.0204034	0.723533	9.77926	1.13867	6.74064	2.28207	1.31555	1.88706	4.38738	6.87167	13.0477	6.6798	12.0324	0.0409028	0.638748	0.0616428	0.424197	0.128325	0.0917142	0.108562	0.28104	0.726722	1.19016	0.70739	1.02749	0.0385909	0.528237	0.0539249	0.340785	0.124229	0.0775401	0.09793	0.230053	0.828877	1.40035	0.745548	1.22357	NA	NA
dd_Smed_v6_10426_0_1	3505	-0.728499	3.56959	2.84439	0.0916936	0.181947	-0.875108	3.56959	4.09242	0.0430759	0.109697	7.53326	10.7891	11.7663	9.6675	12.3232	2.25522	8.76927	12.5294	18.2581	13.5783	14.4675	19.5485	1.71624	2.83994	2.56698	2.45178	2.79258	0.633607	2.0331	3.23438	7.78146	4.99134	6.17431	6.72726	1.61923	2.34859	2.24559	1.96967	2.70345	0.535686	1.83398	2.64759	8.8753	5.87282	6.50736	8.01106	NA	NA
dd_Smed_v6_10427_0_1	2580	0.289978	0.0305025	0.0449668	0.832065	0.894831	-0.541396	0.0305025	0.155479	0.693353	0.823029	1.36194	1.64759	0.189778	1.55212	2.37335	0	0.296009	0	1.75941	0.988828	0.162922	0.977424	0.421525	0.589173	0.0562471	0.534763	0.730658	0	0.0932327	0	1.01869	0.493811	0.0944592	0.456958	0.397699	0.487239	0.0492047	0.429609	0.707337	0	0.0841016	0	1.16189	0.581019	0.0995543	0.544162	NA	NA
dd_Smed_v6_10428_0_1	568	1.18551	2.0895	4.16489	0.0412701	0.0947108	0.441759	2.0895	0.587405	0.443424	0.628488	6.89485	7.01556	2.15082	8.55884	5.93338	3.99362	2.14607	2.65774	3.02088	2.70119	2.41124	2.69634	9.69303	11.3953	2.89553	13.3944	8.29709	6.92369	3.07028	4.23365	7.94474	6.12726	6.35005	5.72585	9.14516	9.42378	2.533	10.7606	8.03226	5.85366	2.76958	3.46557	9.06153	7.20935	6.69258	6.81855	NA	NA
dd_Smed_v6_10429_0_1	2436	-0.156831	3.18914	0.169622	0.680448	0.79269	0.209566	3.18914	0.305152	0.58067	0.743439	5.87339	8.18482	7.21158	10.5988	7.21134	9.67866	13.1354	11.0528	10.0585	7.57297	11.2416	6.67345	1.92528	3.09987	2.26374	3.86753	2.35131	3.91252	4.38176	4.10532	6.16811	4.00543	6.90296	3.30435	1.81646	2.56356	1.98031	3.10703	2.27626	3.30786	3.95262	3.36052	7.03515	4.7128	7.27531	3.93494	NA	NA
dd_Smed_v6_1043_0_1	1555	0.901919	4.34998	0.960133	0.327153	0.48357	-1.12218	4.34998	1.47124	0.22515	0.39881	5.40522	58.463	3.66905	69.3577	6.43543	8.73899	7.88125	10.5888	0.630733	21.8024	0.977531	49.8486	2.77566	34.6867	1.80425	39.6478	3.28715	5.53413	4.11858	6.16122	0.605912	18.0649	0.940339	38.6666	2.61877	28.6855	1.57835	31.8516	3.18223	4.67885	3.71521	5.04343	0.691085	21.2552	0.991062	46.0456	Contig1553	-2.11108
dd_Smed_v6_10431_0_1	5550	-1.46395	3.01875	13.3689	0.000255827	0.00106245	-1.08138	3.01875	7.5073	0.00614493	0.0210922	5.36266	4.19871	6.45247	3.01555	4.79234	6.06091	7.99225	5.90609	12.5815	14.1571	10.5899	15.0995	0.771561	0.697967	0.889007	0.48298	0.685846	1.07538	1.1702	0.962849	3.38636	3.28656	2.8542	3.28158	0.727951	0.57721	0.7777	0.388009	0.663956	0.909188	1.05559	0.788165	3.86238	3.86698	3.00816	3.90783	NA	NA
dd_Smed_v6_10434_0_1	2685	-0.749012	2.20163	2.05509	0.151698	0.270862	0.141213	2.20163	0.0749105	0.784317	0.880723	3.44742	1.5413	2.27734	4.65637	6.38979	4.60441	6.3272	4.85143	6.40692	4.60649	4.00788	5.08935	1.02526	0.529608	0.648569	1.54155	1.89023	1.68869	1.91492	1.63485	3.56451	2.21048	2.23282	2.28629	0.967309	0.437979	0.567366	1.23843	1.8299	1.42771	1.72737	1.33825	4.06557	2.60085	2.35326	2.72259	NA	NA
dd_Smed_v6_10435_0_1	2415	-1.04174	1.39218	1.32537	0.249631	0.3968	-0.210963	1.39218	0.0558628	0.813159	0.898373	1.57475	0	1.51823	3.19294	3.65131	3.66474	0.703022	3.20616	3.51883	3.85884	2.60675	2.99968	0.520688	0	0.48072	1.17524	1.20089	1.49432	0.236556	1.20121	2.17658	2.05873	1.61461	1.4982	0.491257	0	0.420532	0.94415	1.16256	1.26338	0.213388	0.983284	2.48254	2.42231	1.7017	1.78412	NA	NA
dd_Smed_v6_10436_0_1	1140	1.22865	2.62857	3.82373	0.0505317	0.111748	1.28285	2.62857	4.16626	0.0412367	0.106049	9.32081	2.28537	11.5132	6.65195	2.41899	10.9472	13.4314	4.09208	2.52293	4.63061	4.07305	1.44928	6.52878	1.84954	7.72262	5.1868	1.68539	9.45623	9.57414	3.24781	3.30594	5.23351	5.3444	1.53342	6.15976	1.52955	6.75572	4.16689	1.6316	7.9948	8.63646	2.65858	3.77066	6.15776	5.63268	1.82605	Contig3888	-0.238913
dd_Smed_v6_10437_0_1	1668	-1.37064	2.85143	7.29406	0.0069183	0.0205469	-1.7196	2.85143	11.2636	0.000790417	0.0034087	1.02146	6.64352	5.3138	6.6076	4.83798	3.89966	2.99709	3.62803	13.2786	11.1906	10.9484	15.2006	0.488999	3.67464	2.43602	3.5213	2.30378	2.30223	1.46011	1.968	11.8919	8.64408	9.81832	10.9921	0.46136	3.03888	2.13102	2.82889	2.23025	1.94643	1.31711	1.61096	13.5635	10.1706	10.3479	13.0897	NA	NA
dd_Smed_v6_10438_0_1	1737	-0.208502	3.61028	0.439512	0.507358	0.654617	0.269857	3.61028	0.74298	0.388708	0.579348	11.1509	8.55686	10.1215	11.1753	14.1488	17.431	10.5453	15.0605	11.4528	10.66	13.0338	12.2684	5.12618	4.54492	4.45573	5.71892	6.46982	9.88192	4.93336	7.84497	9.84931	7.90714	11.2242	8.51922	4.83644	3.7586	3.89785	4.59437	6.26332	8.3547	4.4502	6.42171	11.2338	9.30355	11.8296	10.145	NA	NA
dd_Smed_v6_10439_0_1	890	-0.767004	2.55802	1.53266	0.215713	0.355401	-0.87007	2.55802	1.97034	0.160412	0.308362	5.87339	4.78334	6.13617	2.3947	5.52261	0.469838	7.32623	4.51394	5.27824	7.62121	8.9607	10.7854	5.26965	4.95853	5.27206	2.39176	4.92863	0.519849	6.68918	4.58899	8.85918	11.033	15.0604	14.617	4.9718	4.10065	4.61197	1.92145	4.77132	0.439508	6.03405	3.75644	10.1045	12.9815	15.8728	17.4064	Contig53	-0.043107
dd_Smed_v6_1044_0_1	1070	0.723997	7.20021	6.68227	0.00973764	0.0275854	0.524365	7.20021	3.5224	0.0605446	0.144235	143.047	216.738	131.769	220.712	137.7	178.163	159.438	144.952	126.412	91.7439	129.067	84.0248	106.752	186.88	94.1681	183.357	102.217	163.965	121.085	122.572	176.482	110.472	180.433	94.7189	100.719	154.548	82.3779	147.302	98.9542	138.625	109.226	100.335	201.29	129.982	190.165	112.795	Contig5847	-0.16375
dd_Smed_v6_10440_0_1	1214	-0.549452	-0.688261	0.0893656	0.764985	0.85203	-0.830973	-0.688261	0.203193	0.652156	0.794945	1.83011	0	0.0632595	0.0443463	0	0	1.59105	0	0.796715	0.74765	1.01012	0.303338	1.20377	0	0.0398455	0.0324709	0	0	1.065	0	0.980345	0.793487	1.24462	0.301385	1.13573	0	0.0348567	0.026086	0	0	0.960691	0	1.11815	0.933619	1.31176	0.3589	Contig6220	0.144933
dd_Smed_v6_10441_0_1	1044	-3.00311	0.388921	7.66313	0.00563606	0.0172416	0.856609	0.388921	0.769543	0.380359	0.570852	0.425608	0	0.126519	0.0443463	2.6472	1.59745	1.48005	3.37491	0.531144	1.18177	1.95506	1.34817	0.325531	0	0.0926676	0.0377583	2.01399	1.50676	1.15201	2.92491	0.759987	1.45845	2.8012	1.55761	0.307131	0	0.0810652	0.0303337	1.94971	1.2739	1.03919	2.39426	0.866818	1.71602	2.9523	1.85485	NA	NA
dd_Smed_v6_10442_0_1	1281	-3.981	-0.05445	5.01437	0.0251377	0.0624502	-3.57329	-0.05445	4.21253	0.0401265	0.103743	0.425608	0	0.126519	0	0	0.751741	0	0	2.09138	2.5806	2.93259	1.48299	0.265304	0	0.075523	0	0	0.57788	0	0	2.43881	2.59556	3.42442	1.39637	0.250308	0	0.0660672	0	0	0.488571	0	0	2.78163	3.05394	3.60914	1.66285	NA	NA
dd_Smed_v6_10443_0_1	1808	-1.66983	2.16804	3.75864	0.0525352	0.11546	-0.294463	2.16804	0.124154	0.724572	0.844392	3.3623	0	4.04861	0.399117	3.10361	4.27553	3.55211	9.32319	6.04176	5.49885	6.06069	7.24642	1.48498	0	1.7123	0.196226	1.36346	2.32868	1.59651	4.6657	4.99183	3.91862	5.01428	4.83435	1.40105	0	1.49791	0.157641	1.31994	1.96879	1.44015	3.81923	5.69352	4.61066	5.28475	5.75692	NA	NA
dd_Smed_v6_10444_0_1	2884	-2.61443	2.63611	11.4168	0.000727826	0.0027497	-0.693383	2.63611	0.908454	0.340525	0.531941	3.06438	0.637778	3.03645	0	7.3939	8.692	3.99612	5.44204	8.53149	11.2389	9.87307	11.628	0.848457	0.204026	0.80509	0	2.03634	2.96786	1.12597	1.70733	4.419	5.02097	5.12084	4.8632	0.800501	0.168727	0.704289	0	1.97134	2.50919	1.01569	1.39758	5.04018	5.90768	5.39706	5.79127	PL06018B1C03	-0.00906057
dd_Smed_v6_10445_0_1	2118	-0.859763	0.37581	0.56377	0.452745	0.605689	0.319201	0.37581	0.0795295	0.777936	0.876939	2.1706	0	0.316297	0.354771	0.684621	0.281903	2.10907	3.4171	0.995894	1.80883	0.847194	1.5504	0.818346	0	0.114194	0.148894	0.256741	0.131067	0.809183	1.45976	0.702396	1.10035	0.598331	0.882938	0.772091	0	0.0998962	0.119616	0.248547	0.110811	0.729933	1.19493	0.801131	1.29468	0.630605	1.05143	PL06021B2D02	0.0172377
dd_Smed_v6_10446_0_1	1085	0.683045	5.06636	6.39907	0.011418	0.0316429	0.704903	5.06636	6.82106	0.00900891	0.029365	33.7081	47.5676	29.7952	40.976	48.7906	37.634	33.523	34.4663	29.1133	21.2477	24.3405	20.0203	24.8078	40.4477	20.9986	33.5703	35.7173	34.1562	25.1071	28.7419	40.0827	25.2315	33.5571	22.2564	23.4056	33.4498	18.3694	26.9692	34.5773	28.8775	22.6481	23.5274	45.717	29.6874	35.3672	26.5037	Contig4709	0.68012
dd_Smed_v6_10447_0_1	1561	0.717625	3.92088	5.81609	0.0158802	0.0422187	0.552508	3.92088	3.46519	0.0626733	0.148365	13.8323	19.6648	21.5082	17.3838	13.4186	15.6926	17.5385	17.8448	10.2909	9.47827	12.0562	12.1672	7.07576	11.6225	10.536	9.89911	6.82771	9.89944	9.13005	10.3433	9.84794	7.82324	11.5529	9.40162	6.67583	9.61166	9.21682	7.95259	6.60978	8.36952	8.23587	8.46681	11.2323	9.20484	12.1761	11.1958	PL08004A1B07	0.340416
dd_Smed_v6_10449_0_1	1684	0.200607	2.22638	0.14015	0.708132	0.812474	0.533335	2.22638	0.992621	0.319103	0.5092	6.85229	3.24204	4.61794	2.92686	3.05797	7.09455	7.17822	4.89362	4.18276	2.87001	5.37642	2.93227	3.2492	1.77619	2.09691	1.54495	1.44233	4.1486	3.46384	2.62929	3.71035	2.19585	4.77568	2.10027	3.06555	1.46888	1.83436	1.24116	1.39629	3.50745	3.12459	2.15228	4.23191	2.58364	5.03329	2.50108	Contig6299	-0.242655
dd_Smed_v6_1045_0_1	547	1.04516	6.49642	7.7157	0.00547425	0.0168328	1.14304	6.49642	9.19411	0.00242795	0.00933379	139.131	103.905	65.4103	115.256	73.6652	142.643	151.594	85.5962	47.0394	62.3203	75.3351	20.627	203.105	175.251	91.439	187.297	106.966	256.792	225.204	141.585	128.46	146.792	206.013	45.4844	191.625	144.93	79.9905	150.468	103.552	217.106	203.148	115.898	146.518	172.716	217.125	54.1644	Contig4222	0.127195
dd_Smed_v6_10450_0_1	748	0.391939	3.21948	1.28874	0.25628	0.404277	0.131449	3.21948	0.14528	0.703088	0.829957	11.2786	11.2674	9.80522	10.3327	8.53494	8.45708	9.06528	9.57631	8.83026	6.94591	10.3618	6.40381	12.0403	13.8974	10.0237	12.2791	9.06297	11.1337	9.84833	11.5837	17.6346	11.9643	20.7214	10.3264	11.3598	11.493	8.7687	9.86461	8.7737	9.41299	8.88379	9.48214	20.1135	14.0772	21.8391	12.2971	Contig2279	-0.037555
dd_Smed_v6_10452_0_1	2230	-0.726454	0.567706	0.211829	0.645338	0.766678	-2.91562	0.567706	2.96444	0.0851137	0.190729	0	1.75389	0.253038	3.81379	0	1.26856	0	0	0.730322	3.35237	0.782025	4.78601	0	0.725621	0.0867668	1.52022	0	0.560178	0	0	0.48922	1.9369	0.524566	2.5887	0	0.60008	0.0759032	1.22129	0	0.473604	0	0	0.55799	2.27896	0.552861	3.08272	PL06019A2F03	-0.119765
dd_Smed_v6_10453_0_1	1700	-0.604619	0.776717	0.384475	0.535218	0.678	-0.653833	0.776717	0.450651	0.502026	0.679927	1.23426	0	2.6569	1.72951	1.91694	0.704757	1.70205	1.09685	3.31965	2.36354	1.14045	1.71892	0.579751	0	1.19508	0.904334	0.895635	0.408234	0.813592	0.583778	2.91701	1.79132	1.00349	1.21961	0.546983	0	1.04546	0.726509	0.867048	0.345143	0.73391	0.477867	3.32705	2.10767	1.05762	1.45235	NA	NA
dd_Smed_v6_10454_0_1	2772	0.786988	2.06308	1.25831	0.261971	0.410553	0.114166	2.06308	0.026698	0.870207	0.931512	2.08548	5.47426	4.42816	10.3327	4.10772	5.40314	4.07013	0.421864	2.58932	5.23355	2.73709	2.3593	0.600753	1.82198	1.22153	3.31341	1.17701	1.91943	1.19316	0.137699	1.39537	2.43256	1.477	1.0266	0.566797	1.50676	1.06859	2.66188	1.13944	1.62279	1.0763	0.112717	1.59151	2.86215	1.55667	1.22252	NA	NA
dd_Smed_v6_10456_0_1	710	-0.0683432	4.62362	0.0317446	0.858589	0.912494	-0.0889854	4.62362	0.0538771	0.816449	0.900267	22.4295	40.9772	17.7759	16.009	17.5719	25.1363	31.858	21.2197	33.6612	26.3125	31.6068	10.3135	25.2258	53.2472	19.1446	20.043	19.6577	34.8628	36.4622	27.0416	70.8217	47.7489	66.5897	17.5211	23.8	44.0348	16.7476	16.1018	19.0303	29.4749	32.8911	22.1356	80.777	56.1814	70.1816	20.8648	NA	NA
dd_Smed_v6_10459_1_1	3873	0.611524	2.00545	1.13872	0.285922	0.437901	0.531715	2.00545	0.863976	0.352628	0.543613	3.53254	7.44074	3.66905	3.54771	7.25698	3.85267	4.03313	2.06713	3.718	2.60472	2.54158	3.03338	0.728322	1.77248	0.7244	0.814246	1.48826	0.979565	0.846208	0.482916	1.43403	0.866509	0.981614	0.944699	0.687156	1.46582	0.633703	0.654136	1.44076	0.828177	0.763331	0.395304	1.63561	1.01954	1.03456	1.12498	NA	NA
dd_Smed_v6_1046_0_1	1979	0.936995	6.50738	14.0379	0.00017916	0.000770358	0.793159	6.50738	10.1087	0.00147572	0.00595978	114.148	113.578	106.466	115.167	82.8847	123.004	106.6	94.2444	66.5257	55.2779	63.7025	49.2082	46.0581	52.9492	41.1374	51.7296	33.266	61.2056	43.7719	43.0884	50.2156	35.9887	48.1498	29.992	43.4548	43.7883	35.9868	41.5577	32.2042	51.7465	39.4849	35.2712	57.2744	42.3443	50.7471	35.7155	Contig7298	-0.101629
dd_Smed_v6_10460_0_1	7637	-6.15104	3.30147	21.1907	4.16e-06	2.48e-05	-4.56659	3.30147	13.7588	0.000207841	0.00101494	0	0	1.58149	0	2.23643	1.31555	1.11003	0	28.5822	30.7501	20.6585	30.8394	0	0	0.158349	0	0.232597	0.16963	0.118113	0	5.59071	5.18781	4.04632	4.87076	0	0	0.138523	0	0.225173	0.143414	0.106545	0	6.37659	6.10399	4.26458	5.80027	NA	NA
dd_Smed_v6_10462_0_1	1754	-1.8328	0.63552	2.29226	0.13002	0.240691	-1.47123	0.63552	1.51692	0.218087	0.389502	1.91524	0	1.07541	0	1.14103	0.751741	1.70205	0.253118	2.22416	3.93119	2.83484	1.71892	0.871918	0	0.468832	0	0.516703	0.422044	0.788544	0.13057	1.89423	2.88772	2.41759	1.18206	0.822636	0	0.410133	0	0.500211	0.356818	0.711315	0.106882	2.1605	3.3977	2.548	1.40764	NA	NA
dd_Smed_v6_10464_0_1	1596	1.19783	1.12476	2.01363	0.155892	0.276543	0.906433	1.12476	1.16496	0.28044	0.466011	3.31974	1.3287	1.77127	4.7894	0.502055	3.94664	3.66311	1.05466	0.56434	2.12236	1.10787	1.07854	1.66094	0.768082	0.84864	2.6675	0.249856	2.43508	1.86509	0.597902	0.528205	1.71335	1.03834	0.815108	1.56706	0.635195	0.742387	2.14297	0.241881	2.05875	1.68243	0.489429	0.602455	2.01593	1.09435	0.97066	Contig378	0.12896
dd_Smed_v6_10466_0_1	1020	-0.57873	2.46008	1.52738	0.216506	0.356305	-0.632391	2.46008	1.82785	0.176382	0.331291	4.08583	6.27148	4.42816	4.03552	5.93338	4.22854	5.51317	2.44681	5.6434	6.89768	8.04834	7.51605	3.19863	5.6726	3.31968	3.51685	4.62034	4.08234	4.39222	2.17046	8.26486	8.7129	11.8029	8.88798	3.01784	4.69117	2.90404	2.82531	4.47287	3.45143	3.96205	1.77668	9.42664	10.2516	12.4396	10.5841	PL08003B2D06	-0.5751
dd_Smed_v6_10467_0_1	3538	-1.92879	2.17333	9.05567	0.00261882	0.00877794	-1.78506	2.17333	7.86309	0.00504541	0.0177733	1.44707	1.3287	1.64475	4.52333	4.42721	0.704757	2.99709	1.77183	8.76387	7.23532	8.11351	10.0776	0.326598	0.346484	0.355479	1.13646	0.993904	0.196155	0.688375	0.453121	3.70026	2.63488	3.43033	3.43567	0.308138	0.286538	0.310971	0.912994	0.962181	0.16584	0.620957	0.370914	4.22041	3.1002	3.61536	4.09132	Contig4609	0.120361
dd_Smed_v6_10468_0_1	3032	2.18729	1.24552	4.0881	0.043186	0.0982664	1.98883	1.24552	3.4263	0.0641658	0.151108	4.08583	0.58463	2.53038	5.98676	4.06208	0.798725	5.95719	0.674982	0	1.61589	0.716856	0.539268	1.07606	0.177895	0.638159	1.75516	1.06412	0.25941	1.59659	0.201425	0	0.686661	0.353661	0.21453	1.01523	0.147117	0.558259	1.41004	1.03016	0.219319	1.44023	0.164882	0	0.807927	0.372738	0.255471	NA	NA
dd_Smed_v6_10469_0_1	1205	-2.13573	1.82154	5.6366	0.0175893	0.0460724	-0.430739	1.82154	0.251956	0.615701	0.768369	1.27682	0	2.84668	0.665195	7.16569	0.845708	2.25707	5.31548	6.04176	5.11296	5.47418	4.38156	0.84611	0	1.80644	0.490701	4.72327	0.691118	1.52209	3.99123	7.48981	5.46696	6.79542	4.38586	0.798286	0	1.58027	0.394212	4.57252	0.584309	1.37302	3.26713	8.54265	6.43243	7.16196	5.22284	NA	NA
dd_Smed_v6_1047_0_1	1233	-0.493317	6.75371	2.99122	0.083717	0.169186	-0.490871	6.75371	2.96363	0.0851567	0.190793	79.0354	113.525	115.891	71.1315	121.817	84.2889	94.0199	80.0276	122.063	117.936	107.691	186.553	51.1849	84.9452	71.8721	51.2807	78.4722	67.3173	61.964	58.7256	147.883	123.237	130.648	182.496	48.2918	70.2486	62.8735	41.1971	75.9676	56.9136	55.8953	48.0714	168.67	145.001	137.695	217.323	Contig1495	-0.680322
dd_Smed_v6_10471_0_1	834	-0.794863	3.48926	4.25401	0.0391577	0.0904954	-0.832177	3.48926	4.67537	0.030598	0.0828392	5.78827	9.46038	14.0436	6.82934	10.6801	5.16822	10.3973	8.85914	12.2495	13.2648	18.736	18.3014	5.54199	10.4654	12.8761	7.27893	10.1714	6.1023	10.1307	9.61117	21.9405	20.4924	33.6044	26.4687	5.22874	8.65473	11.264	5.84763	9.84674	5.15921	9.13849	7.86748	25.0247	24.1114	35.417	31.5198	PL03019B2C02	0.179412
dd_Smed_v6_10472_0_1	2086	-0.273868	2.95559	0.386525	0.534132	0.677376	-0.206932	2.95559	0.221529	0.637877	0.784695	6.00107	9.24778	5.3138	7.71626	4.06208	12.4507	5.92018	7.21387	11.5192	7.66944	9.15621	5.86454	2.29719	4.09011	1.94788	3.28812	1.5467	5.87758	2.30624	3.129	8.24901	4.73707	6.56577	3.39104	2.16735	3.38248	1.704	2.64156	1.49733	4.96922	2.08037	2.56132	9.40857	5.57364	6.91993	4.03818	NA	NA
dd_Smed_v6_10473_0_1	566	-9.24109	1.83344	72.4209	1.74e-17	3.98e-16	-11.0496	1.83344	81.8284	1.48e-19	4.64e-18	0	0	0	0.0443463	0	0	0	0	8.89665	11.9142	10.0034	10.6506	0	0	0	0.0696461	0	0	0	0	23.4804	27.1211	26.4372	22.697	0	0	0	0.0559512	0	0	0	0	26.781	31.9107	27.8633	27.0284	NA	NA
dd_Smed_v6_10474_0_1	3553	1.14931	5.10805	14.8952	0.000113652	0.000508319	0.746372	5.10805	6.36616	0.0116317	0.0364229	34.1763	45.7606	49.4056	57.7833	42.0813	28.6131	25.6048	45.2238	22.2748	18.643	15.7057	27.7386	7.68092	11.8825	10.633	14.4565	9.40733	7.93029	5.8561	11.5166	9.36513	6.76054	6.61219	9.41679	7.24678	9.8267	9.30167	11.6138	9.10707	6.70469	5.28257	9.42718	10.6816	7.95446	6.96886	11.2139	NA	NA
dd_Smed_v6_10477_0_1	368	0.143122	0.890413	0.0372499	0.846957	0.904523	-0.105953	0.890413	0.0204047	0.886413	0.941151	3.02182	1.80704	1.45497	1.46343	2.32771	1.36253	1.11003	1.72964	2.65572	2.05001	1.27079	1.04483	6.55697	4.53035	3.02328	3.53492	5.02404	3.646	2.45116	4.25264	10.7802	7.17741	5.16548	3.42462	6.18636	3.74654	2.64475	2.83983	4.86368	3.08253	2.2111	3.48111	12.2956	8.44496	5.44411	4.07816	NA	NA
dd_Smed_v6_10479_0_1	2843	-1.52828	1.32438	2.99828	0.0833527	0.168553	-0.604243	1.32438	0.49097	0.483495	0.663934	2.89413	0	1.07541	1.01997	2.60156	1.59745	2.99709	2.32025	2.8217	5.06473	3.38878	3.20191	0.812877	0	0.289248	0.318907	0.726823	0.553311	0.856655	0.738429	1.48262	2.2953	1.783	1.35845	0.766932	0	0.253033	0.256198	0.703624	0.467798	0.772756	0.604461	1.69103	2.70065	1.87917	1.6177	NA	NA
dd_Smed_v6_1048_0_1	1857	1.69898	5.40334	39.3133	3.61e-10	3.93e-09	1.3481	5.40334	25.2038	5.16e-07	4.23e-06	58.9892	51.1285	67.8141	64.4352	55.5455	42.9432	45.7704	45.7722	14.6728	18.9083	15.6405	25.413	25.3655	25.4018	27.9242	30.8437	23.758	22.772	20.0288	22.3019	11.8031	13.119	12.5986	16.5066	23.9318	21.0069	24.428	24.7787	22.9997	19.2527	18.0672	18.2558	13.4623	15.4359	13.2782	19.6567	Contig1560	0.767019
dd_Smed_v6_10480_0_1	1214	-8.42902	-0.603063	19.5136	9.99e-06	5.53e-05	-8.42902	-0.603063	20.3635	6.4e-06	4.26e-05	0	0	0	0	0	0	0	0	0.962698	1.44706	1.85731	2.46041	0	0	0	0	0	0	0	0	1.18458	1.53578	2.28849	2.44457	0	0	0	0	0	0	0	0	1.3511	1.807	2.41194	2.91108	NA	NA
dd_Smed_v6_10481_0_1	1405	-2.01564	1.93151	4.08965	0.0431465	0.0981934	-1.16846	1.93151	1.44974	0.228569	0.403289	0	0.106296	2.0243	4.39029	2.28207	2.81903	0.999031	5.65297	8.29912	5.18532	7.52699	5.42639	0	0.0697998	1.10172	2.77761	1.2901	1.9758	0.57781	3.64042	8.82369	4.75509	8.01363	4.65852	0	0.0577236	0.963782	2.23144	1.24893	1.67044	0.52122	2.97996	10.064	5.59485	8.44589	5.54753	Contig6237	-0.613926
dd_Smed_v6_10482_0_1	2562	-0.799482	1.43428	1.09938	0.294403	0.446723	-0.921428	1.43428	1.45796	0.227255	0.401402	1.44707	1.86019	2.53038	2.74947	0.182565	2.86601	1.92406	2.91086	2.88809	6.05355	2.93259	3.06709	0.451017	0.669868	0.75523	0.95395	0.0565993	1.10158	0.61027	1.028	1.68394	3.04433	1.71221	1.44398	0.425524	0.553973	0.660672	0.766369	0.0547928	0.931338	0.550501	0.841496	1.92065	3.58196	1.80457	1.71954	NA	NA
dd_Smed_v6_10483_0_1	1529	-1.01864	2.30152	2.90979	0.0880434	0.17623	-0.522918	2.30152	0.7842	0.37586	0.566528	0.766094	3.24204	2.97319	6.1198	4.83798	3.10093	5.18016	5.35767	3.81759	5.59532	7.78767	9.36979	0.40009	1.95624	1.48692	3.55782	2.51321	1.99712	2.75308	3.17044	3.72973	4.71495	7.61876	7.39155	0.377476	1.61779	1.30075	2.85823	2.43299	1.68847	2.48345	2.59525	4.25401	5.54762	8.02972	8.80212	Contig2896	-0.398167
dd_Smed_v6_10484_0_1	895	-1.2439	1.0025	1.06621	0.301802	0.454329	-0.0644061	1.0025	0.00296361	0.956585	0.978561	2.29828	1.64759	0.126519	0	0.958469	5.49711	2.77509	0.0421864	3.22006	1.47118	3.42136	1.5841	2.05052	1.6984	0.108095	0	0.850603	6.04825	2.51963	0.0426481	5.37447	2.11789	5.71821	2.13488	1.93462	1.40455	0.094561	0	0.823453	5.11352	2.27286	0.0349108	6.12995	2.49192	6.02665	2.54229	NA	NA
dd_Smed_v6_10485_0_1	3045	4.93553	5.15667	217.669	2.92e-49	3.55e-47	5.16413	5.15667	233.948	8.21e-53	1.46e-50	43.8802	46.4515	55.2888	48.2045	61.6158	69.724	48.8045	46.9534	2.15777	1.03706	1.33596	1.82003	11.5071	14.0742	13.8842	14.072	16.0723	22.5483	13.0243	13.9518	1.05855	0.438812	0.656282	0.720949	10.8567	11.6392	12.1459	11.3049	15.5593	19.0635	11.7487	11.4206	1.20735	0.516307	0.691682	0.858532	NA	NA
dd_Smed_v6_10489_0_1	1584	-0.0636852	1.99339	0.0107395	0.917462	0.951103	-1.34401	1.99339	4.56997	0.0325371	0.0870661	1.36194	6.69667	3.73231	7.2728	2.0995	2.49014	1.14704	2.10932	5.80938	3.8106	7.03823	3.26931	0.686574	3.90046	1.80175	4.08133	1.05277	1.54806	0.588443	1.20486	5.4786	3.09955	6.64649	2.48952	0.647768	3.22563	1.57617	3.27879	1.01917	1.30881	0.530812	0.986273	6.24872	3.64694	7.00501	2.9646	NA	NA
dd_Smed_v6_1049_0_1	452	-3.04549	4.58115	57.166	4.01e-14	6.73e-13	-2.31934	4.58115	35.4219	2.65e-09	3.1e-08	11.3212	3.34834	8.47677	3.0599	13.7381	10.3364	11.0263	8.26853	46.4087	59.3779	54.8395	55.8817	20.0003	6.83443	14.3405	6.0176	24.1412	22.5191	19.8233	16.5516	153.375	169.257	181.484	149.123	18.8698	5.652	12.545	4.83433	23.3707	19.0389	17.8818	13.5488	174.935	199.148	191.274	177.581	Contig7284	0.311011
dd_Smed_v6_10490_0_1	1250	-0.104609	3.00591	0.0508581	0.821577	0.888615	-0.357614	3.00591	0.59334	0.44113	0.626588	3.70279	15.6787	7.27484	6.1198	4.70106	9.67866	7.40023	5.69516	10.8552	6.43944	9.02587	8.89793	2.36539	11.5721	4.45027	4.35193	2.98716	7.62473	4.81081	4.12237	12.9725	6.6374	10.801	8.58603	2.23169	9.57	3.89308	3.49619	2.89181	6.44635	4.33964	3.37447	14.7961	7.80958	11.3836	10.2245	Contig3269	-0.334688
dd_Smed_v6_10491_1_1	1673	0.201685	2.18281	0.178261	0.672872	0.787005	-0.0410639	2.18281	0.00739488	0.931472	0.963677	5.87339	5.58056	3.92209	4.34594	3.46874	4.36949	4.69915	4.13426	3.88399	5.28179	4.07305	3.9097	2.80334	3.07747	1.79264	2.3091	1.64683	2.5719	2.28247	2.2359	3.46798	4.06766	3.64173	2.81877	2.64489	2.54503	1.5682	1.85505	1.59426	2.17442	2.05893	1.83026	3.95547	4.78602	3.83817	3.3567	NA	NA
dd_Smed_v6_10493_0_1	4619	1.60337	4.95737	32.6381	1.11e-08	1.02e-07	1.22625	4.95737	19.4316	1.04e-05	6.66e-05	44.6888	37.6821	35.7416	59.0693	27.0197	37.1642	43.0323	29.2352	15.9343	14.1812	15.7708	12.4369	7.72563	7.5266	5.91696	11.3676	4.64627	7.92311	7.57059	5.72675	5.15323	3.95573	5.1073	3.24771	7.28896	6.22441	5.17613	9.13233	4.49797	6.69862	6.82914	4.68778	5.87762	4.65432	5.38279	3.86748	NA	NA
dd_Smed_v6_10495_0_1	3628	-0.540757	1.21798	0.488181	0.48474	0.634045	-0.961381	1.21798	1.52279	0.217198	0.388125	0.723533	3.08259	1.13867	3.45901	0.456414	1.50348	1.73905	2.57337	2.05818	2.53236	3.81237	3.84229	0.159248	0.783901	0.239996	0.847501	0.0999225	0.408084	0.389519	0.641779	0.847444	0.89933	1.57185	1.27743	0.150247	0.648277	0.209947	0.680852	0.0967332	0.345016	0.35137	0.525345	0.966569	1.05815	1.65664	1.52121	NA	NA
dd_Smed_v6_10497_0_1	2566	0.319978	2.09544	0.349965	0.554133	0.693974	0.219977	2.09544	0.165788	0.683882	0.8168	4.76681	6.53723	3.47927	3.6364	3.51439	6.81265	2.40507	4.47176	3.58522	4.96826	3.29102	2.89857	1.48339	2.35044	1.03682	1.25971	1.08784	2.61444	0.761649	1.57678	2.08715	2.49464	1.91849	1.36251	1.39954	1.94378	0.907008	1.01201	1.05312	2.21039	0.687054	1.29072	2.38054	2.9352	2.02197	1.62253	Contig3638	-0.535396
dd_Smed_v6_10498_0_1	2774	-0.877894	3.4784	3.96572	0.0464357	0.104056	-0.0363851	3.4784	0.00697799	0.933427	0.96496	10.9381	5.26167	9.55218	2.92686	11.456	14.3301	7.54823	18.0558	13.2786	8.03121	14.0765	17.324	3.14861	1.74996	2.63311	0.937887	3.28018	5.08698	2.21117	5.88926	7.15056	3.73022	7.59051	7.53277	2.97065	1.4472	2.30343	0.753465	3.17548	4.30081	1.99461	4.82081	8.15571	4.38899	7.99995	8.9703	NA	NA
dd_Smed_v6_10499_0_1	4089	3.71627	3.29748	51.4845	7.22e-13	1.07e-11	3.98111	3.29748	57.8703	2.8e-14	5.67e-13	20.8122	6.05889	16.0679	8.5145	17.1155	20.6729	14.6895	9.36538	0.56434	1.18177	1.4663	0.674085	4.06429	1.36706	3.00479	1.85096	3.32464	4.97855	2.91925	2.07233	0.206167	0.372371	0.536401	0.198843	3.83457	1.13054	2.62858	1.487	3.21853	4.20913	2.63334	1.69636	0.235147	0.438132	0.565334	0.23679	NA	NA
dd_Smed_v6_105_0_1	387	0.408418	8.93008	2.38876	0.12221	0.229533	0.3232	8.93008	1.49787	0.220999	0.393166	559.674	496.67	543.842	570.516	498.586	526.548	600.418	420.64	400.681	382.821	478.241	373.78	1154.8	1184.05	1074.57	1310.42	1023.3	1339.82	1260.74	983.447	1546.62	1274.51	1848.5	1164.98	1089.53	979.192	940.028	1052.75	990.635	1132.75	1137.26	805.026	1764.02	1499.6	1948.21	1387.3	Contig6185	-0.822342
dd_Smed_v6_1050_0_1	1134	1.238	6.63087	22.6769	1.92e-06	1.22e-05	0.945424	6.63087	13.383	0.000253911	0.0012164	111.977	110.282	165.297	142.928	101.78	86.7791	126.137	118.333	55.9029	52.3596	55.8822	60.7351	78.8498	89.7234	111.461	112.037	71.289	75.3565	90.3882	94.4154	73.6403	59.49	73.7131	64.6011	74.393	74.2001	97.506	90.0063	69.0136	63.7104	81.5357	77.2862	83.9919	69.996	77.6893	76.9293	Contig5264	0.730085
dd_Smed_v6_10501_0_1	539	-6.33911	0.894628	14.9515	0.00011031	0.000495057	-2.90489	0.894628	4.54233	0.0330665	0.0881767	0	0.212593	0	0	0.0456414	1.22158	0	1.18122	3.18686	7.25944	7.00564	0.977424	0	0.363891	0	0	0.0672577	2.23178	0	1.98286	8.8322	17.353	19.4421	2.1873	0	0.300934	0	0	0.065111	1.88687	0	1.62312	10.0737	20.4176	20.4908	2.60471	Contig6745	-0.0559405
dd_Smed_v6_10502_0_1	630	-1.26287	1.24167	1.08953	0.296575	0.449002	-1.60987	1.24167	1.7394	0.187214	0.346648	1.31938	4.5176	0.695854	0	0.365131	3.10093	1.66505	0	5.97536	2.38766	2.31349	5.02194	1.6723	6.61575	0.844599	0	0.460341	4.84697	2.14768	0	14.1683	4.88305	5.49303	9.61488	1.57778	5.47114	0.738851	0	0.445648	4.09789	1.93734	0	16.16	5.74541	5.78932	11.4497	NA	NA
dd_Smed_v6_10504_0_1	3005	0.530414	5.37031	4.02303	0.0448831	0.101321	0.333514	5.37031	1.59637	0.206419	0.373642	33.623	55.4335	56.9968	47.1845	47.1932	40.0772	34.8551	46.405	35.2878	36.9002	28.9023	32.6257	8.93461	17.0192	14.5037	13.9576	12.474	13.1332	9.4255	13.9724	17.5418	15.8214	14.3871	13.0957	8.4296	14.0747	12.6878	11.213	12.0759	11.1035	8.50238	11.4375	20.0077	18.6154	15.1631	15.5948	PL06016B1H09	0.00257355
dd_Smed_v6_10506_0_1	2181	0.0623253	1.64721	0.00984222	0.920973	0.95253	-0.581979	1.64721	0.848362	0.357016	0.547998	1.61731	3.40148	3.41601	5.67633	1.8713	3.28887	2.22007	1.64527	4.11636	2.3153	4.5944	2.49412	0.592135	1.43888	1.19767	2.31349	0.681489	1.48494	0.827168	0.682546	2.81937	1.36777	3.15106	1.37935	0.558666	1.18994	1.04771	1.85857	0.659737	1.25545	0.746156	0.558716	3.21569	1.60932	3.32103	1.64258	NA	NA
dd_Smed_v6_10508_0_1	1269	0.199111	2.92871	0.166357	0.68337	0.794965	0.310622	2.92871	0.40576	0.524129	0.698839	11.7468	2.9763	11.7663	4.16856	9.08263	9.16184	7.40023	7.46699	4.04997	6.15003	6.51688	9.97646	7.39163	2.16385	7.09005	2.91998	5.68489	7.10952	4.73878	5.32396	4.76744	6.24418	7.68179	9.48262	6.97384	1.78948	6.20235	2.3458	5.50344	6.01076	4.27467	4.35807	5.43759	7.34692	8.09615	11.2922	NA	NA
dd_Smed_v6_10509_0_1	2285	-10.5802	1.54072	44.295	2.82e-11	3.51e-10	-2.98398	1.54072	9.10939	0.00254301	0.00972205	0	0	0	0	0.547696	0	0.851026	2.36244	6.93806	6.82532	7.68991	8.49348	0	0	0	0	0.190382	0	0.302649	0.935459	4.53572	3.84855	5.03407	4.48345	0	0	0	0	0.184305	0	0.273008	0.765745	5.17331	4.52821	5.30561	5.33906	NA	NA
dd_Smed_v6_1051_0_1	577	0.77637	5.0362	5.47094	0.0193352	0.0498698	0.847084	5.0362	6.50703	0.0107449	0.0341342	40.7732	37.2037	35.7416	35.4327	31.4925	48.3933	56.7968	19.9542	25.7605	22.3089	26.2956	12.7065	56.4264	59.4871	47.3665	54.5863	43.3515	82.5902	79.989	31.2902	66.6918	49.8153	68.1697	26.5622	53.2371	49.1951	41.436	43.8527	41.9678	69.8262	72.155	25.6134	76.0666	58.6128	71.8468	31.6312	PL05017B1A07	0.328007
dd_Smed_v6_10510_0_1	2119	0.0803714	2.5965	0.0257229	0.872579	0.921843	0.082159	2.5965	0.026947	0.869609	0.931212	4.42632	10.7891	3.41601	5.67633	5.93338	5.07425	3.55211	9.78724	5.47742	6.41532	6.6798	4.41526	1.668	4.69749	1.23271	2.38118	2.22404	2.35809	1.36219	4.17907	3.86135	3.90074	4.71538	2.51327	1.57372	3.88477	1.07837	1.91295	2.15306	1.99365	1.22878	3.42089	4.40414	4.58962	4.96973	2.99289	Contig5656	0.0246811
dd_Smed_v6_10511_0_1	1315	0.00587133	3.1357	0.000180185	0.98929	0.995047	-0.496467	3.1357	1.28045	0.257815	0.439711	6.7246	13.8185	12.7784	5.41025	5.65953	6.71868	6.4382	8.47946	6.37372	7.71768	7.7225	16.7173	4.08342	9.69501	7.4306	3.65719	3.41843	5.03127	3.97852	5.83436	7.24039	7.56173	8.78449	15.334	3.85262	8.01765	6.50026	2.93805	3.30932	4.2537	3.58887	4.77587	8.25817	8.89715	9.25833	18.2602	NA	NA
dd_Smed_v6_10513_0_1	962	0.50599	1.9145	0.742609	0.388826	0.545861	0.0963997	1.9145	0.0270307	0.869408	0.931149	2.68133	2.12593	5.88313	7.36149	2.78412	4.55743	3.62611	2.61556	2.58932	2.77354	3.06293	4.28044	2.22566	2.03885	4.67634	6.80215	2.29872	4.66513	3.06301	2.46003	4.02074	3.71466	4.76263	5.36694	2.09986	1.68611	4.09084	5.4646	2.22535	3.94415	2.76303	2.01372	4.58593	4.37068	5.01953	6.39115	Contig1455	-0.0340092
dd_Smed_v6_10514_0_1	1260	-0.161204	2.28513	0.0818562	0.774798	0.860042	-0.173451	2.28513	0.0950798	0.757816	0.864796	2.89413	9.08834	4.9975	1.55212	4.83798	5.16822	3.70012	4.6405	6.40692	3.95531	4.36631	5.96566	1.83413	6.65466	3.03288	1.09499	3.04976	4.03914	2.38631	3.33231	7.5958	4.04455	5.18356	5.71085	1.73047	5.50333	2.65315	0.879677	2.95242	3.41491	2.1526	2.72775	8.66353	4.75883	5.46316	6.80069	Contig3183	-0.622091
dd_Smed_v6_10515_0_1	2277	-1.806	1.80853	2.32685	0.127159	0.236594	-2.04257	1.80853	2.93331	0.0867693	0.193646	0.468169	6.74982	0.442816	0	3.74259	0	1.44304	1.30778	7.13724	5.78826	7.82025	6.06677	0.164181	2.7349	0.148708	0	1.30551	0	0.514991	0.519663	4.68233	3.27525	5.13738	3.21372	0.154901	2.26173	0.130089	0	1.26384	0	0.464553	0.425384	5.34052	3.85367	5.4145	3.82701	NA	NA
dd_Smed_v6_10516_0_1	758	-9.78871	0.882087	23.8096	1.06e-06	7.12e-06	-2.23734	0.882087	2.88125	0.0896162	0.198683	0	0	0	0	1.73437	1.92634	0	0	3.41924	4.7512	4.26855	4.85342	0	0	0	0	1.81738	2.50254	0	0	6.73837	8.07596	8.42356	7.7231	0	0	0	0	1.75937	2.11578	0	0	7.68557	9.50219	8.87794	9.19694	NA	NA
dd_Smed_v6_10518_0_1	1605	-1.68561	1.58134	2.81042	0.0936541	0.185082	-1.67315	1.58134	2.77729	0.0956098	0.208886	1.48963	4.03926	1.13867	0	1.78001	3.52379	1.29504	0.126559	5.34463	4.67884	7.26632	4.17933	0.741115	2.32188	0.542495	0	0.880887	2.16199	0.655678	0.0713459	4.97436	3.75598	6.7721	3.14083	0.699226	1.92016	0.474572	0	0.852771	1.82786	0.591462	0.0584021	5.6736	4.4193	7.1374	3.74022	PL06011B2F12	-0.261561
dd_Smed_v6_10519_0_1	450	0.448788	3.65513	1.28049	0.257808	0.405966	0.00420241	3.65513	0.00011256	0.991535	0.996084	10.9807	29.3378	8.66655	11.9292	9.12827	8.22217	12.9134	14.4699	10.6561	12.8789	11.4371	9.63942	19.485	60.1488	14.7267	23.5642	16.1119	17.9925	23.319	29.0941	35.3736	36.8745	38.0179	25.8376	18.3836	49.7423	12.8829	18.9306	15.5977	15.2119	21.0352	23.8157	40.346	43.3866	40.0686	30.7683	Contig3631	-0.216458
dd_Smed_v6_1052_0_1	1622	-0.444623	6.94712	3.16605	0.0751842	0.155213	-0.683101	6.94712	7.43459	0.00639819	0.0218246	92.4846	106.668	128.923	133.128	92.9258	94.1555	92.2809	111.541	166.978	156.331	174.131	130.2	45.5304	60.6732	60.7787	72.958	45.5048	57.1629	46.2321	62.2205	153.781	124.181	160.587	96.8216	42.9569	50.176	53.169	58.6118	44.0524	48.3285	41.7042	50.9323	175.398	146.112	169.249	115.299	Contig5572	-0.356679
dd_Smed_v6_10520_0_1	831	-0.756653	1.19253	0.572986	0.449075	0.602497	-0.0390531	1.19253	0.00155492	0.968546	0.984662	0.595851	4.94278	0.569335	0	2.60156	2.34919	1.59105	3.50147	2.88809	1.80883	3.09552	2.52782	0.572558	5.4876	0.52389	0	2.48659	2.78379	1.55584	3.81241	5.19164	2.80451	5.57207	3.66909	0.540196	4.53818	0.458296	0	2.40722	2.35356	1.40346	3.12075	5.92143	3.29979	5.87263	4.36929	NA	NA
dd_Smed_v6_10521_0_1	1650	-1.12508	2.20047	3.51474	0.0608253	0.130529	-0.275431	2.20047	0.217846	0.640686	0.786547	4.51144	0.903519	2.40386	3.01555	1.91694	8.22217	5.10616	4.3452	6.70569	6.58414	4.75732	5.66232	2.18331	0.505202	1.11403	1.62457	0.922775	4.90706	2.51474	2.38274	6.07091	5.14133	4.31283	4.13927	2.0599	0.417796	0.974551	1.30512	0.893322	4.14869	2.26845	1.95045	6.9243	6.0493	4.54547	4.92919	PL06014B2B10	-0.32996
dd_Smed_v6_10522_0_1	2309	-2.75514	2.98801	21.4154	3.7e-06	2.22e-05	-2.53601	2.98801	18.5865	1.62e-05	9.93e-05	2.89413	3.50778	3.22623	0.931273	2.60156	0.469838	4.36614	4.80925	20.7146	19.7524	17.4001	13.3806	1.00087	1.40159	1.06843	0.358516	0.894914	0.200375	1.53658	1.88453	13.4013	11.0219	11.2723	6.9898	0.944299	1.1591	0.934655	0.288019	0.866351	0.169408	1.38609	1.54264	15.2851	12.9684	11.8803	8.32371	NA	NA
dd_Smed_v6_10523_0_1	2724	0.0821206	3.60327	0.0606024	0.805546	0.878437	-0.196714	3.60327	0.34766	0.555441	0.723334	10.4274	15.6787	15.1823	11.0866	9.08263	10.6653	15.1705	8.18416	14.5733	11.7212	12.1866	10.9539	3.05669	5.31026	4.26189	3.61781	2.64836	3.85555	4.52558	2.71843	7.99179	5.54404	6.69204	4.85037	2.88392	4.39152	3.72829	2.90642	2.56383	3.25968	4.08236	2.22524	9.11519	6.52312	7.05301	5.77599	Contig3298	0.305162
dd_Smed_v6_10524_0_1	1161	-1.19743	0.640716	1.3726	0.241365	0.387458	-1.03376	0.640716	1.03742	0.308422	0.497658	0.383047	2.49796	1.13867	0	0.547696	1.1746	1.36904	1.39215	2.35695	2.02589	2.83484	1.98855	0.263453	1.98503	0.749961	0	0.374696	0.996265	0.958225	1.08494	3.03258	2.24825	3.65242	2.06594	0.248562	1.64159	0.656063	0	0.362737	0.842296	0.864378	0.888104	3.45887	2.64529	3.84943	2.4602	Contig2480	0.0777715
dd_Smed_v6_10525_0_1	1223	-0.64392	2.16551	1.54031	0.214572	0.354053	-0.417112	2.16551	0.65476	0.418416	0.605654	2.1706	4.14556	5.12402	2.74947	5.2944	3.61775	4.10713	3.54366	4.64751	6.2465	3.94271	7.28012	1.41722	3.12729	3.20374	1.99838	3.43845	2.91294	2.72894	2.62166	5.6766	6.58067	4.82228	7.18002	1.33711	2.58623	2.80262	1.60543	3.3287	2.46275	2.46167	2.14603	6.47455	7.74283	5.0824	8.55022	Contig5127	-0.199244
dd_Smed_v6_10526_0_1	1814	0.036258	0.39283	0.00060296	0.98041	0.989813	0.995798	0.39283	0.449241	0.502696	0.680484	1.14914	0	2.6569	0	4.7467	1.31555	0.0740023	1.26559	0.863108	0.313531	0.0325844	2.49412	0.505847	0	1.11998	0	2.07839	0.714147	0.0331505	0.631258	0.710759	0.222691	0.0268693	1.65841	0.477256	0	0.979754	0	2.01205	0.603778	0.0299038	0.516733	0.81067	0.262019	0.0283187	1.9749	NA	NA
dd_Smed_v6_10527_0_1	961	-2.39167	2.94596	23.897	1.02e-06	6.82e-06	-0.716098	2.94596	2.40256	0.121137	0.249452	1.14914	2.55111	2.15082	3.81379	6.66364	3.52379	8.99128	11.7278	14.3409	12.3483	10.9158	13.2121	0.954846	2.44917	1.71141	3.52767	5.50757	3.61081	7.60293	11.0419	22.2919	16.5555	16.9909	16.5829	0.900876	2.02543	1.49713	2.834	5.33178	3.05277	6.85831	9.03865	25.4254	19.4793	17.9074	19.7475	Contig5401	-0.3769
dd_Smed_v6_10529_0_1	968	2.69146	3.28969	49.0189	2.54e-12	3.54e-11	2.48201	3.28969	42.317	7.76e-11	1.11e-09	15.2368	14.7752	14.4864	13.2152	13.5555	9.39676	15.4665	11.4747	1.59343	1.95354	2.31349	3.06709	12.569	14.0822	11.4435	12.1354	11.1227	9.5592	12.9837	10.7255	2.45897	2.6002	3.57501	3.82177	11.8586	11.6458	10.0107	9.74914	10.7677	8.08186	11.7121	8.77962	2.80462	3.0594	3.76784	4.5511	NA	NA
dd_Smed_v6_1053_0_1	1506	2.55581	6.56911	91.9855	8.73e-22	2.75e-20	1.98223	6.56911	57.6328	3.16e-14	6.34e-13	178.628	130.054	160.046	149.403	111.502	108.063	103.159	92.6413	28.6818	24.986	30.9552	20.4922	94.7124	79.6727	81.2632	88.1838	58.807	70.6594	55.6629	55.6584	28.4495	21.3763	30.7463	16.4126	89.359	65.8884	71.0887	70.8438	56.93	59.7392	50.2113	45.5606	32.4487	25.1513	32.4047	19.5447	Contig1731	2.11179
dd_Smed_v6_10530_0_1	2609	0.5008	1.42686	0.400022	0.527078	0.671486	0.265031	1.42686	0.112355	0.737479	0.852438	1.48963	1.48815	2.72016	6.56326	2.23643	5.59107	2.22007	0.379677	1.95859	2.09824	2.18315	2.42671	0.455918	0.526241	0.797246	2.23615	0.680852	2.11028	0.691473	0.131671	1.12141	1.0362	1.25168	1.12191	0.430149	0.435195	0.697428	1.79644	0.65912	1.78414	0.623751	0.107783	1.27905	1.21919	1.3192	1.33601	NA	NA
dd_Smed_v6_10531_0_1	1317	-1.17987	1.65315	1.72429	0.189141	0.321834	-0.832675	1.65315	0.874354	0.349753	0.540512	1.9578	4.305	1.83452	0	1.91694	3.28887	0.999031	4.09208	2.48974	4.63061	4.85507	6.37011	1.18704	3.01578	1.06515	0	1.1561	2.45912	0.616419	2.81131	2.82398	4.53015	5.51435	5.83411	1.11994	2.49401	0.931788	0	1.1192	2.07907	0.556048	2.30127	3.22095	5.33018	5.8118	6.94746	NA	NA
dd_Smed_v6_10532_0_1	4207	2.31222	0.894282	8.4484	0.00365365	0.0117806	1.57631	0.894282	4.07916	0.0434151	0.11031	1.9578	1.3287	3.09971	5.54329	2.14514	2.16126	1.59105	1.26559	0.763519	0.627061	0.423597	0.572973	0.371602	0.291386	0.563406	1.17125	0.405001	0.505886	0.307322	0.27219	0.271108	0.192043	0.150614	0.164276	0.350598	0.240972	0.492866	0.940942	0.392074	0.427703	0.277223	0.222808	0.309217	0.225958	0.158738	0.195626	NA	NA
dd_Smed_v6_10533_0_1	709	0.0719143	3.62286	0.0454171	0.831239	0.894353	-0.000119129	3.62286	1.25e-07	0.999718	0.99987	13.3215	12.4367	9.61544	15.2108	10.5432	12.0279	14.9855	10.5888	10.4569	14.1571	15.4776	8.05532	15.0034	16.1834	10.3704	19.0704	11.8113	16.7055	17.1754	13.513	22.0318	25.727	32.6544	13.7041	14.1554	13.3835	9.07199	15.3205	11.4343	14.1238	15.4933	11.0614	25.1288	30.2704	34.4158	16.3193	NA	NA
dd_Smed_v6_10534_0_1	998	-0.360888	-0.303592	0.0538938	0.816421	0.88486	0.931613	-0.303592	0.356713	0.550337	0.719326	1.40451	0	0.442816	0	1.36924	2.44316	0	0.759355	1.26147	0.385884	0.0651688	0.674085	1.12377	0	0.339286	0	1.08974	2.41068	0	0.688438	1.88816	0.49818	0.0976772	0.8147	1.06025	0	0.296806	0	1.05495	2.03812	0	0.563539	2.15358	0.58616	0.102946	0.970174	Contig7721	-0.0825005
dd_Smed_v6_10536_0_1	481	-0.385019	0.593857	0.0959168	0.756786	0.846991	0.665621	0.593857	0.287755	0.591663	0.750708	1.14914	0	2.46712	0.310424	3.33182	0	3.73712	1.05466	0.929501	1.37471	1.53147	1.28076	1.90771	0	3.92209	0.573675	5.50185	0	6.31356	1.98389	2.88669	3.68236	4.76263	3.21171	1.79988	0	3.43103	0.46087	5.32624	0	5.69522	1.62397	3.29247	4.33268	5.01953	3.82462	NA	NA
dd_Smed_v6_10539_0_1	854	-1.21855	1.25989	1.77268	0.183051	0.313543	-0.963144	1.25989	1.12211	0.289464	0.475598	2.80901	0	0.759114	2.52774	2.14514	2.63109	1.14704	1.39215	3.45243	4.87178	3.68203	2.25819	2.62651	0	0.679707	2.63106	1.99513	3.03387	1.09144	1.47496	6.03896	7.35005	6.44933	3.18945	2.47805	0	0.594605	2.1137	1.93145	2.565	0.98455	1.20736	6.88785	8.64809	6.79721	3.79811	NA	NA
dd_Smed_v6_1054_0_1	3048	-0.471247	5.34439	2.66399	0.102643	0.199101	-0.625878	5.34439	4.68562	0.030416	0.0824824	36.2192	53.1482	24.5447	34.191	35.1895	39.1845	32.561	26.1556	55.7369	56.3632	55.1002	38.1532	9.48871	16.0874	6.15765	9.97131	9.17001	12.6595	8.68092	7.76426	27.3163	23.8254	27.041	15.0984	8.95239	13.3041	5.38669	8.0106	8.87733	10.7031	7.83072	6.35564	31.1562	28.033	28.4996	17.9797	Contig4402	-0.797175
dd_Smed_v6_10540_0_1	6264	-5.50832	1.61454	19.0513	1.27e-05	6.88e-05	-3.15328	1.61454	7.98619	0.00471356	0.0167435	0.595851	0.0531482	0	0	1.23232	0	1.55405	0.717168	5.44422	7.40415	7.78767	10.7517	0.0759572	0.00782796	0	0	0.156258	0	0.201602	0.103591	1.29831	1.52294	1.85969	2.07032	0.071664	0.00647363	0	0	0.151271	0	0.181858	0.0847968	1.48081	1.7919	1.96	2.46541	NA	NA
dd_Smed_v6_10541_0_1	631	0.365577	2.45761	0.42285	0.515518	0.661765	0.233862	2.45761	0.173524	0.676999	0.811528	2.85157	7.81278	4.23838	9.26839	3.69695	5.59107	9.47229	3.29054	4.31554	4.00355	7.95059	2.49412	3.6086	11.4232	5.13622	13.0566	4.65357	8.72539	12.1986	4.71833	10.2165	8.17477	18.8475	4.76761	3.40463	9.44686	4.49314	10.4892	4.50504	7.37691	11.0038	3.86231	11.6526	9.61845	19.8642	5.67744	NA	NA
dd_Smed_v6_10542_0_1	2136	0.137007	2.98314	0.102798	0.748498	0.841083	0.055378	2.98314	0.0168242	0.896797	0.94623	6.7246	10.6296	6.32595	9.22404	7.30262	8.92692	3.62611	11.2638	9.06264	6.12591	6.22362	8.52718	2.5139	4.59123	2.26463	3.83862	2.7155	4.11547	1.3795	4.77126	6.33794	3.69513	4.35839	4.81524	2.37181	3.79689	1.98109	3.08381	2.62882	3.47944	1.2444	3.90564	7.22886	4.34769	4.59348	5.73416	NA	NA
dd_Smed_v6_10544_0_1	3500	-2.34145	1.02613	3.83171	0.0502915	0.111348	-1.6432	1.02613	1.98748	0.158604	0.306026	0.127682	0	0.126519	2.74947	0.0912827	1.78538	1.51705	1.51871	2.45654	5.49885	2.41124	5.02194	0.0291304	0	0.0276414	0.698291	0.0207154	0.502322	0.35222	0.392607	1.04846	2.02425	1.03052	1.73068	0.0274839	0	0.0241806	0.560982	0.0200542	0.42469	0.317724	0.321378	1.19584	2.38173	1.08611	2.06095	NA	NA
dd_Smed_v6_10545_0_1	512	-3.91934	0.0613567	6.02542	0.0141013	0.0380358	-9.09212	0.0613567	18.6459	1.57e-05	9.64e-05	0	0.690926	0	0	0	0	0	0	2.32375	2.26707	2.76967	3.30302	0	1.24501	0	0	0	0	0	0	6.77977	5.70499	8.09176	7.78134	0	1.02961	0	0	0	0	0	0	7.73279	6.7125	8.52823	9.2663	Contig3034	-0.578538
dd_Smed_v6_1055_0_1	616	0.395512	5.75018	2.19215	0.138716	0.253044	0.334908	5.75018	1.57464	0.209535	0.377928	42.9438	62.396	73.6973	58.2267	42.5378	63.1932	63.716	57.9641	45.5456	40.3972	54.8395	39.5351	55.6677	93.4518	91.4836	84.0228	54.8486	101.02	84.0524	85.1391	110.449	84.495	133.167	77.4133	52.5212	77.2836	80.0295	67.5009	53.098	85.408	75.8205	69.6929	125.974	99.417	140.35	92.1865	Contig735	-0.421015
dd_Smed_v6_10551_0_1	1311	-10.5996	1.41499	39.0383	4.16e-10	4.48e-09	-6.16785	1.41499	23.5721	1.2e-06	9.23e-06	0	0	0	0	0.410772	0	0	0	7.96715	7.8865	5.76743	8.72941	0	0	0	0	0.248869	0	0	0	9.0781	7.75072	6.58058	8.03148	0	0	0	0	0.240925	0	0	0	10.3542	9.11951	6.93554	9.56417	NA	NA
dd_Smed_v6_10552_0_1	741	0.3328	1.46647	0.126011	0.722604	0.822811	0.686013	1.46647	0.533404	0.465179	0.647446	2.93669	3.34834	1.77127	2.43905	0	6.90662	1.66505	4.85143	3.51883	1.64001	1.72697	1.44928	3.16464	4.16891	1.82784	2.92589	0	9.17838	1.82596	5.92383	7.09372	2.85159	3.48619	2.35911	2.98576	3.44764	1.59899	2.35055	0	7.7599	1.64713	4.84911	8.09088	3.35519	3.67424	2.80932	NA	NA
dd_Smed_v6_10554_0_1	627	0.481958	1.6264	0.508842	0.47564	0.626605	1.22401	1.6264	3.24188	0.0717783	0.165534	2.00036	4.83648	1.83452	1.99559	1.46052	3.52379	4.29213	8.56383	1.9254	1.92942	1.98765	1.78633	2.54755	7.11663	2.23732	2.82916	1.85018	5.53428	5.56273	12.3581	4.58719	3.96478	4.74194	3.43642	2.40356	5.88537	1.9572	2.27285	1.79112	4.67897	5.01793	10.116	5.23201	4.66497	4.99772	4.09222	NA	NA
dd_Smed_v6_10555_0_1	2830	-3.40473	2.71659	25.4384	4.57e-07	3.25e-06	-3.54782	2.71659	27.3835	1.67e-07	1.49e-06	0.297925	2.39167	1.89778	1.64081	0.593338	0.610789	1.11003	3.29054	13.9757	17.4371	12.5776	21.8741	0.0840629	0.779698	0.512782	0.515381	0.166528	0.212532	0.318737	1.05204	7.37704	7.93869	6.64806	9.32302	0.0793115	0.644801	0.44858	0.414039	0.161213	0.179686	0.287521	0.861173	8.41403	9.34068	7.00666	11.1022	Contig938	-0.102223
dd_Smed_v6_10556_0_1	714	1.21895	0.86648	1.83185	0.17591	0.303966	0.119737	0.86648	0.0180006	0.893271	0.944907	3.23462	4.62389	0.822373	2.3947	0.31949	2.81903	1.48005	0.548423	1.49384	1.06118	1.79214	0.404451	3.6175	5.97477	0.880731	2.98132	0.355411	3.88794	1.68446	0.694973	3.12537	1.91492	3.75455	0.683253	3.41303	4.94107	0.77046	2.39509	0.344067	3.28708	1.51948	0.568889	3.5647	2.2531	3.95708	0.813642	NA	NA
dd_Smed_v6_10558_1_1	1401	-0.307057	3.25474	0.53735	0.463533	0.615483	-0.0944667	3.25474	0.0511587	0.821059	0.902968	13.7471	7.33445	7.90743	4.43463	14.1488	8.73899	5.84618	10.0404	8.96305	9.06827	12.8382	10.5157	7.83533	4.82994	4.31589	2.81368	8.02147	6.14245	3.39091	6.48428	9.55679	8.33963	13.7073	9.05346	7.39246	3.9943	3.77552	2.26041	7.76545	5.19316	3.05881	5.30788	10.9002	9.81242	14.4467	10.7812	NA	NA
dd_Smed_v6_1056_0_1	386	-0.557156	6.39359	4.31675	0.037739	0.087659	-0.246177	6.39359	0.848411	0.357002	0.547998	52.3072	89.1826	76.9235	53.1713	94.7515	81.9867	76.5184	83.5712	106.959	76.815	110.722	105.023	108.208	213.16	152.386	122.446	194.971	209.158	161.087	195.894	413.928	256.401	429.072	328.177	102.091	176.281	133.306	98.3688	188.748	176.834	145.311	160.354	472.114	301.681	452.216	390.805	NA	NA
dd_Smed_v6_10560_0_1	525	0.160258	2.46602	0.0845961	0.771163	0.857094	0.121717	2.46602	0.0489411	0.824916	0.904969	5.61802	7.54704	6.13617	3.50336	3.1949	7.00059	9.95331	2.02495	6.50651	3.18354	6.02811	4.68489	8.54491	13.2626	8.93739	5.93172	4.83358	13.1309	15.406	3.48984	18.5133	7.81289	17.1754	10.7635	8.06193	10.968	7.81839	4.76533	4.67931	11.1016	13.8972	2.8567	21.1157	9.19266	18.1018	12.8176	NA	NA
dd_Smed_v6_10561_0_1	2391	-0.703122	2.29749	0.990763	0.319556	0.47526	-0.928742	2.29749	1.71899	0.189824	0.350066	2.29828	8.87575	5.06076	0.443463	5.70517	1.1746	3.2191	4.13426	4.87988	5.9812	6.54946	9.70683	0.767551	3.42482	1.61848	0.164867	1.89523	0.483757	1.09405	1.56448	3.04877	3.22306	4.09742	4.89679	0.724167	2.83228	1.41584	0.132448	1.83473	0.408994	0.986901	1.28065	3.47733	3.79226	4.31844	5.83127	NA	NA
dd_Smed_v6_10562_0_1	2153	-2.01028	2.34225	8.06357	0.00451641	0.0142367	-2.72182	2.34225	13.9708	0.000185673	0.000916984	2.34084	6.53723	0.189778	1.50778	0.958469	1.50348	1.62805	2.36244	8.36551	11.7936	11.0135	11.5269	0.868183	2.80131	0.0674024	0.622512	0.353595	0.687659	0.614478	0.992812	5.80421	7.05768	7.65185	6.45774	0.819112	2.31665	0.0589634	0.500104	0.342309	0.581383	0.554297	0.812693	6.6201	8.30408	8.0646	7.69011	NA	NA
dd_Smed_v6_10564_0_1	1153	-0.439705	1.01235	0.214429	0.643318	0.765525	0.806803	1.01235	0.724943	0.394527	0.584208	1.10658	0	1.58149	2.21732	0.912827	2.81903	3.2561	4.68269	1.69302	1.66412	0.814609	2.49412	0.766367	0	1.04884	1.70944	0.628827	2.40763	2.29483	3.67466	2.19345	1.85959	1.05683	2.60916	0.72305	0	0.91752	1.3733	0.608756	2.03554	2.07008	3.00799	2.50178	2.18799	1.11383	3.10708	Contig2618	-0.179643
dd_Smed_v6_10565_0_1	2539	-1.54307	2.42421	4.14494	0.0417591	0.0955158	0.0433167	2.42421	0.00345241	0.953146	0.977087	2.63877	0	2.46712	4.03552	11.7755	4.27553	4.73615	6.74982	7.70158	4.96826	4.95283	9.10015	0.829892	0	0.743019	1.41284	3.68373	1.65823	1.51581	2.40536	4.53119	2.52117	2.91793	4.32314	0.782985	0	0.64999	1.13502	3.56615	1.40196	1.36736	1.96897	5.16813	2.96641	3.07532	5.14815	NA	NA
dd_Smed_v6_10566_0_1	2823	0.29163	2.59106	0.392648	0.530911	0.675029	0.201567	2.59106	0.188052	0.664543	0.803445	6.17131	8.02537	4.9975	6.6963	5.11183	5.87298	4.99516	8.3529	4.64751	4.87178	8.53711	3.10079	1.74562	2.62281	1.35368	2.10853	1.43826	2.04864	1.43787	2.67718	2.45926	2.2235	4.5236	1.32488	1.64695	2.16903	1.18419	1.69391	1.39235	1.73203	1.29705	2.19148	2.80495	2.61618	4.76761	1.57771	NA	NA
dd_Smed_v6_10567_0_1	1744	-7.87571	-0.639014	13.2654	0.00027035	0.00111712	-1.16061	-0.639014	0.585417	0.444197	0.629107	0	0	0	0	0	1.40951	0.62902	0	1.02909	1.15765	1.0427	1.34817	0	0	0	0	0	0.795869	0.29309	0	0.881458	0.855247	0.894329	0.93242	0	0	0	0	0	0.672871	0.264385	0	1.00536	1.00629	0.94257	1.11036	NA	NA
dd_Smed_v6_10568_0_1	1893	-0.403264	4.23302	1.12151	0.289593	0.442189	-0.114556	4.23302	0.0911239	0.762753	0.867867	16.6413	18.8145	20.6226	7.36149	21.8622	11.4171	24.0137	20.1229	14.6396	18.6671	17.1394	33.4009	7.01971	9.16966	8.33039	3.45677	9.17309	5.93913	10.3084	9.61813	11.5525	12.7054	13.5434	21.2824	6.62294	7.5832	7.28739	2.77705	8.8803	5.02126	9.29883	7.87318	13.1764	14.9492	14.274	25.3439	NA	NA
dd_Smed_v6_10569_0_1	1602	-1.55146	2.48101	3.77358	0.052068	0.114567	-1.19526	2.48101	2.28838	0.130346	0.262853	3.48998	1.435	3.09971	4.61202	3.37746	0	7.10422	5.69516	9.79296	8.5618	8.50452	10.2461	1.73958	0.826422	1.47956	2.55908	1.67456	0	3.6036	3.21658	9.13158	6.88593	7.94094	7.71453	1.64125	0.683441	1.29431	2.05587	1.62111	0	3.25067	2.63302	10.4152	8.102	8.36928	9.18674	Contig7467	0.482886
dd_Smed_v6_1057_0_1	426	-0.115464	3.8182	0.00715243	0.932602	0.960083	-4.0216	3.8182	6.77691	0.00923447	0.0299716	0.170243	39.5954	0.189778	38.3152	0.0912827	4.51045	0.481015	0.126559	0.199179	20.3313	0.130338	64.1392	0.319112	85.7526	0.340651	79.9497	0.170197	10.4263	0.917554	0.268803	0.698439	61.4915	0.457661	181.605	0.301075	70.9164	0.298	64.2288	0.164764	8.81492	0.82769	0.220036	0.796618	72.351	0.482348	216.262	Contig7464	-2.53276
dd_Smed_v6_10570_0_1	753	-3.47387	1.21578	9.30054	0.00229087	0.00780241	-2.55793	1.21578	5.50553	0.0189565	0.0556328	0.978898	0.903519	0	0	0.912827	0.845708	0.148005	1.68746	7.5356	5.5712	4.72473	3.40413	1.03807	1.10702	0	0	0.962865	1.10597	0.159721	2.02763	14.9492	9.53266	9.3857	5.45286	0.979394	0.91549	0	0	0.932133	0.935049	0.144078	1.65977	17.0506	11.2161	9.89197	6.49347	NA	NA
dd_Smed_v6_10571_0_1	734	-1.23671	0.973152	1.46119	0.226741	0.368987	-0.439842	0.973152	0.191396	0.661757	0.801405	1.14914	1.70074	1.58149	0	0.638979	5.07425	1.18404	0.801541	1.22827	3.8106	2.83484	2.56152	1.25015	2.13774	1.64756	0	0.691453	6.80761	1.31085	0.988054	2.49973	6.68895	5.77719	4.20936	1.17948	1.76788	1.44128	0	0.669383	5.75552	1.18246	0.808798	2.85111	7.87023	6.08882	5.01265	NA	NA
dd_Smed_v6_10573_0_1	373	-8.45637	-0.58182	19.4541	1.03e-05	5.69e-05	-8.45637	-0.58182	20.2954	6.64e-06	4.41e-05	0	0	0	0	0	0	0	0	2.95449	1.01295	1.20562	1.68521	0	0	0	0	0	0	0	0	11.8323	3.49895	4.83489	5.44953	0	0	0	0	0	0	0	0	13.4955	4.11687	5.09569	6.4895	NA	NA
dd_Smed_v6_10574_0_1	839	-1.30426	1.95529	4.8412	0.0277875	0.0680113	-0.706983	1.95529	1.47204	0.225023	0.398639	1.83011	2.87	2.53038	1.90689	4.60978	5.26219	1.85006	2.10932	8.13314	4.79943	6.12586	3.50524	1.7418	3.15597	2.3062	2.02032	4.36405	6.17622	1.79187	2.27474	14.4807	7.37035	10.9217	5.03929	1.64335	2.60995	2.01745	1.62305	4.22476	5.22171	1.61637	1.86205	16.5163	8.67197	11.5108	6.00097	NA	NA
dd_Smed_v6_10575_0_1	1524	-0.214088	2.43866	0.183965	0.667987	0.783104	-0.19363	2.43866	0.15103	0.697553	0.825873	6.42668	1.86019	7.21158	4.70071	4.7467	6.62472	4.18113	4.93581	5.94217	5.88473	6.81013	4.78601	3.36732	1.12612	3.61841	2.74179	2.47388	4.28057	2.22942	2.93038	5.82445	4.9751	6.68429	3.78793	3.17699	0.931285	3.16537	2.20265	2.39492	3.61902	2.01107	2.39874	6.64318	5.85371	7.04484	4.5108	NA	NA
dd_Smed_v6_10576_0_1	1847	-1.77567	1.29959	2.11924	0.145459	0.262374	-2.17468	1.29959	3.0914	0.0787071	0.178658	3.27718	1.06296	1.13867	0	1.50617	2.58411	0.0740023	0	6.20774	3.42472	5.08316	4.11192	1.41683	0.530962	0.471415	0	0.647706	1.37773	0.0325582	0	5.02067	2.38901	4.11672	2.68529	1.33674	0.439099	0.412392	0	0.627032	1.1648	0.0293695	0	5.72642	2.81092	4.33878	3.19774	NA	NA
dd_Smed_v6_10577_0_1	2070	-0.356196	2.57311	0.500805	0.479147	0.629407	-0.736939	2.57311	2.12572	0.144844	0.284576	2.89413	6.96241	7.3381	5.94241	7.34826	1.92634	4.62514	3.83896	8.4319	7.76591	5.8326	7.54976	1.11643	3.10314	2.71073	2.5518	2.81959	0.91639	1.81567	1.67801	6.08485	4.83373	4.2148	4.39922	1.05333	2.56626	2.37133	2.05003	2.7296	0.774765	1.63785	1.37358	6.94019	5.68738	4.44214	5.23875	PL05006A2H12	-0.0476791
dd_Smed_v6_10578_0_1	629	-3.13312	2.49773	13.6611	0.000218949	0.000923822	-2.79915	2.49773	11.2567	0.000793361	0.00341803	4.04327	0	1.51823	0.443463	1.3236	3.61775	1.14704	1.51871	14.706	11.5765	16.8461	9.87535	5.13293	0	1.84569	0.626704	1.67139	5.66379	1.48187	2.18462	34.9253	23.7131	40.0621	18.9372	4.84281	0	1.6146	0.503471	1.61804	4.78847	1.33673	1.78827	39.8347	27.9008	42.2231	22.5511	NA	NA
dd_Smed_v6_10579_0_1	656	-0.537298	1.63237	0.446441	0.50403	0.651411	0.0548817	1.63237	0.00472616	0.945191	0.973043	1.31938	3.34834	4.42816	0.0886927	1.91694	3.89966	5.06916	2.91086	2.75531	2.41177	3.91013	4.21303	1.60602	4.70909	5.1617	0.120182	2.321	5.85385	6.27935	4.01484	6.27424	4.73689	8.91602	7.74648	1.51524	3.89436	4.51543	0.0965499	2.24692	4.94915	5.66436	3.28645	7.1562	5.57343	9.39696	9.22479	NA	NA
dd_Smed_v6_10581_0_1	1218	0.100177	2.69637	0.0396161	0.842233	0.901383	-0.116159	2.69637	0.0532527	0.817497	0.901067	11.3212	5.42111	3.54253	7.18411	3.92516	3.57077	7.43723	8.73258	8.79706	7.0665	6.02811	3.77488	7.42211	4.10633	2.22402	5.24301	2.55966	2.88691	4.96188	6.48703	10.7891	7.4751	7.40318	3.73826	7.00259	3.39588	1.94556	4.21205	2.47796	2.44075	4.47592	5.31013	12.3057	8.79522	7.80251	4.45165	NA	NA
dd_Smed_v6_10582_0_1	1622	1.68296	3.14521	15.459	8.43e-05	0.000386587	1.3728	3.14521	10.4444	0.00123025	0.00507713	9.02289	13.6059	10.5643	16.5412	8.39801	8.22217	9.6943	13.7949	4.51472	4.12413	5.14833	1.68521	4.44199	7.73909	4.9804	9.06507	4.11242	4.99177	4.85678	7.6952	4.15791	3.27599	4.74788	1.25319	4.19092	6.40013	4.35683	7.28255	3.98116	4.22031	4.38111	6.29911	4.74238	3.85453	5.00399	1.49235	NA	NA
dd_Smed_v6_10583_0_1	2350	-0.154515	2.03063	0.056962	0.811364	0.881999	-0.214892	2.03063	0.110304	0.739798	0.853675	6.12875	1.96648	2.78342	4.74506	3.01233	3.66474	7.17822	1.13903	2.65572	5.18532	6.77755	2.79745	2.08251	0.77203	0.905697	1.79485	1.01814	1.53566	2.48217	0.43855	1.68814	2.84294	4.31409	1.43585	1.9648	0.63846	0.7923	1.44192	0.985641	1.29833	2.23907	0.358987	1.92544	3.34501	4.5468	1.70986	NA	NA
dd_Smed_v6_10585_0_1	3399	-1.94348	1.85282	5.50606	0.0189507	0.0490419	-0.494168	1.85282	0.385245	0.534809	0.707621	0.851216	0	2.78342	1.95124	2.6472	6.57773	3.99612	2.02495	5.11226	6.72885	5.11575	4.51637	0.199973	0	0.626181	0.510287	0.618596	1.90565	0.955368	0.53903	2.24676	2.55064	2.25135	1.6027	0.18867	0	0.54778	0.409946	0.598852	1.61114	0.8618	0.441237	2.56258	3.00109	2.37279	1.90855	NA	NA
dd_Smed_v6_10586_0_1	1113	0.00713078	0.836258	6.41e-05	0.993613	0.996895	-0.957331	0.836258	1.12579	0.288674	0.474715	2.51109	3.98611	0.506076	1.153	0.182565	2.06729	0.999031	0.9281	2.42334	3.11119	1.33596	1.24706	1.80156	3.3042	0.347691	0.920855	0.130285	1.82905	0.729401	0.754485	3.25248	3.60157	1.79549	1.35146	1.69974	2.73254	0.304158	0.739782	0.126127	1.54637	0.657965	0.617604	3.70968	4.23761	1.89234	1.60937	Contig2912	0.0112145
dd_Smed_v6_10587_0_1	2273	-4.07172	0.826683	5.73262	0.0166526	0.0439696	-2.98279	0.826683	3.40812	0.0648763	0.15242	0.978898	0	0	0	0.730262	1.40951	0	0	4.7471	3.6659	5.11575	3.47154	0.343891	0	0	0	0.255183	0.610645	0	0	3.11977	2.07798	3.36662	1.8422	0.324454	0	0	0	0.247038	0.516272	0	0	3.55832	2.44495	3.54822	2.19375	NA	NA
dd_Smed_v6_10589_0_1	1199	-0.373431	1.95885	0.399428	0.527385	0.671747	-0.774089	1.95885	1.69951	0.192352	0.353549	1.65987	5.74	2.90994	4.65637	1.55181	3.94664	3.88512	1.94057	5.21185	4.10002	5.8326	4.24674	1.10545	4.41677	1.85582	3.4521	1.02799	3.24136	2.6331	1.46441	6.49332	4.40582	7.27659	4.27218	1.04297	3.65262	1.62347	2.77329	0.995182	2.74042	2.37522	1.19873	7.40609	5.1839	7.66909	5.08747	NA	NA
dd_Smed_v6_1059_0_1	813	-0.367736	5.59507	2.12807	0.144623	0.261244	0.0285416	5.59507	0.0128979	0.909579	0.953433	46.0933	36.2471	37.7026	40.4882	67.0015	49.7089	49.5815	45.055	52.1517	44.7867	50.1799	60.0947	45.2721	41.1334	35.4612	44.2683	65.4585	60.2091	49.5578	50.1422	95.8235	70.9771	92.326	89.1577	42.7132	34.0168	31.0213	35.5636	63.3692	50.904	44.7042	41.0453	109.293	83.5118	97.3061	106.172	Contig3647	-1.25395
dd_Smed_v6_10590_2_1	1939	-1.43909	3.07714	7.59022	0.00586857	0.0178489	-1.10755	3.07714	4.58949	0.0321685	0.0862555	3.74535	1.22241	7.52788	7.67192	10.1324	6.90662	3.95912	4.38738	14.5401	12.2759	9.77531	18.0992	1.5424	0.581635	2.96871	3.51707	4.15055	3.50757	1.65922	2.04729	11.2017	8.15712	7.54114	11.2589	1.45522	0.481005	2.59701	2.82549	4.01807	2.96549	1.49672	1.67586	12.7763	9.59768	7.94792	13.4075	NA	NA
dd_Smed_v6_10591_0_1	1551	6.42404	4.07223	151.25	9.24e-35	6.04e-33	6.58354	4.07223	157.094	4.88e-36	3.75e-34	28.8988	20.8341	22.1408	22.5723	27.5674	19.6392	33.227	25.0587	0.630733	0.0482355	0.0977531	0.337043	14.8782	12.393	10.9158	12.9366	14.1174	12.469	17.4085	14.6183	0.607475	0.0400696	0.0942765	0.262112	14.0373	10.2488	9.54907	10.3928	13.6668	10.542	15.7036	11.9662	0.692867	0.047146	0.0993618	0.312132	NA	NA
dd_Smed_v6_10592_0_1	1210	-4.05955	1.30849	6.24904	0.012426	0.0340272	-3.94518	1.30849	5.97615	0.0145007	0.0440418	1.48963	0	0	0	0.365131	0	1.25804	0	5.90897	5.9812	5.96294	7.54976	0.98305	0	0	0	0.239682	0	0.844873	0	7.29493	6.36888	7.37156	7.52594	0.927486	0	0	0	0.232032	0	0.762127	0	8.32037	7.49364	7.76919	8.96216	NA	NA
dd_Smed_v6_10593_0_1	2723	0.221261	-0.075111	0.043641	0.834523	0.896784	0.226285	-0.075111	0.0457505	0.83063	0.907956	0.638412	1.5413	0	1.46343	1.27796	0.704757	0.925029	0.759355	0.497947	0.699415	0.553934	1.38188	0.187213	0.522217	0	0.477726	0.37277	0.254865	0.276052	0.252318	0.273168	0.330938	0.304295	0.612117	0.176631	0.431867	0	0.383788	0.360872	0.215477	0.249016	0.206541	0.311567	0.389383	0.320709	0.728931	NA	NA
dd_Smed_v6_10594_0_1	651	-1.80378	5.84808	35.6193	2.4e-09	2.39e-08	-0.852062	5.84808	8.36413	0.003827	0.0139759	40.0497	19.2928	31.693	16.3638	58.3297	52.6219	44.9194	51.8892	107.889	80.9633	83.4812	102.697	49.1249	27.3417	37.2267	22.3439	71.1673	79.5984	56.0707	72.1186	247.565	160.239	191.819	190.278	46.3482	22.6113	32.5658	17.9503	68.8958	67.2967	50.5792	59.0346	282.365	188.537	202.166	226.59	NA	NA
dd_Smed_v6_10595_0_1	1833	6.07877	3.64579	69.393	8.07e-17	1.75e-15	6.39265	3.64579	74.788	5.24e-18	1.44e-16	23.1531	10.045	17.6494	15.3438	23.0032	29.9757	11.6554	17.6761	0.0663929	0.74765	0	0.101113	10.0862	5.05592	7.36275	7.44092	9.96778	16.1037	5.16709	8.72518	0.0541071	0.525528	0	0.0665361	9.51614	4.18118	6.4409	5.97777	9.64963	13.6149	4.66103	7.14223	0.0617129	0.618338	0	0.0792335	NA	NA
dd_Smed_v6_10598_0_1	1570	-2.20414	0.468848	3.48243	0.0620238	0.132694	-0.193324	0.468848	0.0299301	0.862649	0.92734	0.0851216	1.27556	0.253038	0	2.23643	2.72506	0.259008	1.30778	1.32786	2.5806	0.716856	2.83116	0.0432935	0.74957	0.123242	0	1.13143	1.70921	0.134059	0.753677	1.26342	2.11778	0.682994	2.17509	0.0408465	0.619885	0.107812	0	1.09532	1.44506	0.12093	0.616942	1.44102	2.49179	0.719835	2.59018	NA	NA
dd_Smed_v6_106_0_1	1511	-0.0445576	9.26675	0.0286388	0.865616	0.917601	0.0420967	9.26675	0.0255663	0.872964	0.932525	557.461	536.956	689.971	604.973	666.729	562.913	682.005	625.582	613.67	574.026	668.697	607.89	294.6	327.858	349.172	355.899	350.475	366.856	366.78	374.602	606.688	489.472	661.986	485.259	277.949	271.135	305.454	285.916	339.288	310.16	330.858	306.641	691.969	575.913	697.694	577.864	Contig2893	-0.86965
dd_Smed_v6_1060_0_1	2412	1.08463	7.23322	16.5018	4.86e-05	0.000234215	1.10761	7.23322	17.1981	3.37e-05	0.000193427	160.965	168.692	205.15	190.689	157.463	172.008	186.782	220.846	103.473	100.643	71.6856	66.2289	53.2889	64.5253	65.0381	70.2755	51.8528	70.2246	62.9274	82.8443	64.0835	53.7611	44.4569	33.1195	50.2769	53.3617	56.8951	56.4569	50.1978	59.3717	56.7644	67.8144	73.0916	63.2554	46.8549	39.4399	Contig6799	-1.23018
dd_Smed_v6_10601_0_1	2439	1.78637	1.95924	8.56705	0.00342301	0.0111079	1.41105	1.95924	5.44718	0.0196	0.0572018	2.25572	9.35408	5.37705	5.27721	3.10361	5.59107	4.10713	4.3452	1.82581	1.18177	1.0427	2.393	0.738511	3.53835	1.6858	1.9233	1.01071	2.25737	1.36839	1.61194	1.11825	0.624282	0.639487	1.18344	0.696769	2.92618	1.47473	1.54511	0.978453	1.9085	1.23437	1.31949	1.27544	0.734532	0.673982	1.40928	PL03020A1B01	-0.0132785
dd_Smed_v6_10602_0_1	1543	-1.91732	1.63172	2.13616	0.143861	0.260154	-1.85357	1.63172	2.00846	0.156424	0.302754	1.65987	0	3.16297	1.37474	0	1.83237	0	4.6405	6.77208	7.28356	2.60675	6.77456	0.858997	0	1.56748	0.79197	0	1.16941	0	2.72113	6.55618	6.08188	2.52707	5.29576	0.810444	0	1.37123	0.63624	0	0.988679	0	2.22746	7.47778	7.15595	2.66339	6.30638	NA	NA
dd_Smed_v6_10603_0_1	387	-9.43933	0.301992	30.5731	3.22e-08	2.72e-07	-9.43933	0.301992	31.8037	1.71e-08	1.77e-07	0	0	0	0	0	0	0	0	3.61842	3.8106	3.77979	2.3593	0	0	0	0	0	0	0	0	13.967	12.6865	14.6097	7.35335	0	0	0	0	0	0	0	0	15.9303	14.927	15.3977	8.75664	NA	NA
dd_Smed_v6_10604_0_1	1060	0.107606	0.925475	0.0116354	0.914101	0.948995	0.867124	0.925475	0.750446	0.386335	0.57689	2.12804	0	2.08756	1.8182	4.33593	2.16126	3.1451	0.590609	1.72622	0.578826	1.01012	2.29189	1.60309	0	1.50594	1.52472	3.24899	2.00779	2.41108	0.504133	2.43267	0.703562	1.42544	2.60796	1.51248	0	1.31739	1.22491	3.14529	1.6975	2.17494	0.412672	2.77463	0.827812	1.50233	3.10566	Contig4624	0.183974
dd_Smed_v6_10605_0_1	1218	0.295258	1.9833	0.258541	0.611125	0.740708	0.375206	1.9833	0.418553	0.51766	0.693134	2.55365	4.03926	2.72016	6.87368	5.52261	3.24188	5.99419	2.36244	2.19097	3.2559	3.84496	3.9097	1.67416	3.05962	1.70773	5.01646	3.60138	2.62101	3.99913	1.75495	2.6871	3.44416	4.72203	3.87176	1.57953	2.53027	1.49392	4.03005	3.48643	2.21594	3.60746	1.43656	3.06482	4.05241	4.97674	4.61064	PL06014B1G06	0.0431296
dd_Smed_v6_10607_0_1	1087	5.07545	4.23152	105.731	8.45e-25	3.14e-23	4.63392	4.23152	91.5388	1.09e-21	3.88e-20	22.6423	25.6706	32.6419	46.2532	14.4683	28.7071	26.5668	23.9197	1.06229	0.385884	1.82473	0.505564	16.6332	21.788	22.9625	37.824	10.5721	26.0063	19.8606	19.9102	1.45985	0.457391	2.51103	0.560996	15.693	18.0184	20.0875	30.3865	10.2346	21.9871	17.9155	16.2981	1.66506	0.538167	2.64648	0.668055	NA	NA
dd_Smed_v6_10609_0_1	1991	0.0172516	1.7837	0.000661551	0.97948	0.989201	-0.0681456	1.7837	0.0103372	0.919017	0.958609	2.21316	5.52741	2.08756	3.94682	1.09539	4.6514	1.59105	5.65297	4.7471	3.52119	3.35619	1.98855	0.887616	2.56131	0.801754	1.7621	0.436989	2.30055	0.649374	2.56896	3.56165	2.27865	2.5215	1.2047	0.837446	2.11817	0.701371	1.41561	0.423041	1.945	0.585776	2.10289	4.06231	2.68107	2.65752	1.4346	NA	NA
dd_Smed_v6_1061_0_1	1863	0.908773	8.35846	11.7233	0.000617225	0.0023735	0.727384	8.35846	7.55404	0.00598756	0.0206496	415.649	326.968	485.516	402.709	408.49	310.187	383.184	336.268	190.017	212.598	212.255	253.759	178.154	161.921	199.28	192.147	174.157	163.957	167.139	163.314	152.361	147.03	170.423	164.294	168.085	133.907	174.329	154.364	168.598	138.618	150.769	133.685	173.778	172.996	179.616	195.648	Contig5177	0.934133
dd_Smed_v6_10610_0_1	3816	0.397776	2.26357	0.457579	0.498757	0.64676	-0.553368	2.26357	0.876349	0.349203	0.539981	8.59728	2.44482	2.78342	11.0422	3.51439	2.49014	3.66311	3.20616	6.67249	3.44884	5.99553	2.79745	1.79902	0.591085	0.557754	2.5722	0.731498	0.642591	0.780054	0.760201	2.61201	1.16446	2.35019	0.884236	1.69733	0.48882	0.487921	2.06641	0.70815	0.543281	0.703657	0.622282	2.97917	1.37011	2.47696	1.05298	NA	NA
dd_Smed_v6_10611_0_1	2319	-0.832255	1.40316	1.06501	0.302075	0.454583	-0.0736849	1.40316	0.00854365	0.926355	0.961413	1.91524	2.49796	1.07541	1.37474	0.228207	2.25522	2.47908	6.66545	2.8549	3.49707	2.18315	3.70747	0.659484	0.993797	0.354606	0.526955	0.0781627	0.957652	0.868704	2.60064	1.83901	1.94296	1.40821	1.92837	0.622209	0.821858	0.310208	0.423337	0.075668	0.80965	0.783625	2.12882	2.09752	2.28609	1.48417	2.29637	Contig6439	-0.573735
dd_Smed_v6_10613_0_1	1579	-0.517971	0.761145	0.358974	0.549077	0.689878	-0.443225	0.761145	0.264197	0.607251	0.762168	1.53219	1.64759	1.26519	1.10866	0.684621	3.94664	0.851026	0.379677	2.39015	2.33942	2.15057	1.07854	0.774842	0.962676	0.612697	0.624124	0.344381	2.4613	0.437969	0.217562	2.26119	1.90891	2.0373	0.823884	0.731046	0.796121	0.535985	0.501399	0.33339	2.08091	0.395075	0.178091	2.57904	2.24603	2.1472	0.981111	NA	NA
dd_Smed_v6_10614_0_1	1407	-1.7475	1.69947	5.76034	0.0163919	0.0433946	-1.99147	1.69947	7.36202	0.00666159	0.0226174	1.06402	1.96648	0.316297	3.90248	0.867186	1.92634	1.07303	2.27806	4.51472	6.02944	7.33148	6.60604	0.603863	1.28946	0.171899	2.46548	0.489542	1.34821	0.619729	1.46495	4.79326	5.52132	7.79439	5.66318	0.569732	1.06637	0.150377	1.98068	0.473917	1.13985	0.559034	1.19917	5.46705	6.49639	8.21483	6.74392	NA	NA
dd_Smed_v6_10615_0_1	1649	-2.37845	2.19764	9.07142	0.00259635	0.00870932	-2.33491	2.19764	8.80233	0.00300847	0.0113041	1.9578	0	3.09971	2.3947	1.8713	1.36253	1.73905	2.69993	6.83847	11.7212	5.47418	14.7625	0.948047	0	1.43739	1.29088	0.901351	0.813663	0.856989	1.48143	6.19488	9.15825	4.96572	10.7982	0.894462	0	1.25742	1.03705	0.872581	0.687914	0.773056	1.21267	7.06569	10.7756	5.23358	12.8589	Contig6818	0.0526771
dd_Smed_v6_10616_0_1	451	-3.16021	-0.432692	3.41367	0.0646586	0.137548	-1.21967	-0.432692	0.599738	0.438678	0.624457	0	0	0.569335	0	0	0.563806	1.51705	0.0843728	1.62663	1.13353	1.10787	1.21335	0	0	0.965304	0	0	1.23104	2.73341	0.169269	5.38773	3.23831	3.67448	3.24507	0	0	0.844444	0	0	1.04079	2.46571	0.138559	6.14508	3.8102	3.87269	3.86435	NA	NA
dd_Smed_v6_10617_0_1	1895	-2.22269	-0.101751	3.85417	0.0496224	0.110049	-0.718179	-0.101751	0.450818	0.501947	0.67991	0.170243	0.212593	0.822373	0	1.55181	0.845708	0.444014	0.548423	1.39425	0.892357	2.11798	1.17965	0.0717371	0.103503	0.331843	0	0.65043	0.439471	0.190401	0.261853	1.09907	0.606721	1.67185	0.750857	0.0676823	0.0855954	0.290295	0	0.629669	0.371552	0.171754	0.214347	1.25357	0.71387	1.76203	0.894147	Contig2503	0.00226579
dd_Smed_v6_10618_0_1	1179	0.02893	3.0343	0.00346961	0.953029	0.973559	0.406266	3.0343	0.685457	0.407714	0.596748	5.87339	13.7654	5.63009	4.43463	8.53494	19.0754	4.66214	6.32796	8.39871	6.72885	7.23373	6.74085	3.97794	10.7718	3.65153	3.34348	5.74987	15.9323	3.21332	4.85624	10.6413	7.35338	9.17768	6.89627	3.7531	8.90811	3.19434	2.68604	5.56635	13.47	2.89862	3.97521	12.1371	8.65201	9.67273	8.21233	NA	NA
dd_Smed_v6_10619_0_1	1632	-0.781969	2.21261	0.888299	0.345939	0.502293	-0.793069	2.21261	0.914616	0.338893	0.530098	6.08619	0	4.49142	4.12421	2.87541	4.79235	5.66118	1.26559	3.718	6.36708	9.15621	6.06677	2.97789	0	2.10444	2.24634	1.39943	2.89166	2.81883	0.701656	3.40318	5.02667	8.39228	4.48385	2.80957	0	1.84095	1.80463	1.35476	2.44476	2.54276	0.574359	3.88156	5.91439	8.84496	5.33952	NA	NA
dd_Smed_v6_1062_0_1	2873	6.10067	8.36569	318.164	3.64e-71	3.41e-68	5.64032	8.36569	283.759	1.14e-63	5.34e-61	549.119	531.163	554.279	638.055	450.206	476.369	339.042	386.174	9.06264	9.11651	5.53934	9.36979	152.621	170.571	147.525	197.414	124.465	163.278	95.8959	121.618	4.71209	4.0884	2.88408	3.93376	143.995	141.06	129.054	158.595	120.493	138.044	86.504	99.5537	5.37447	4.81042	3.03965	4.68446	NA	NA
dd_Smed_v6_10620_0_1	1388	2.62258	1.69213	7.44401	0.00636479	0.0191454	2.78873	1.69213	8.32252	0.00391565	0.014264	5.66058	0	8.22373	2.74947	4.92927	2.0203	7.14122	4.55613	0.497947	0.795886	0.847194	0.539268	3.25653	0	4.53056	1.76082	2.82075	1.43333	4.18086	2.97001	0.535906	0.738791	0.913014	0.468629	3.07246	0	3.96332	1.41458	2.73072	1.21181	3.77139	2.43118	0.611238	0.869262	0.962263	0.55806	NA	NA
dd_Smed_v6_10621_0_1	567	-1.52448	2.43317	3.8309	0.050316	0.111365	-1.28162	2.43317	2.75205	0.0971297	0.211521	4.00071	0.0531482	6.83202	1.72951	4.56414	2.0203	2.33107	5.99047	10.3241	4.46178	10.2967	11.1898	5.63427	0.0864804	9.2138	2.71141	6.39363	3.50875	3.34084	9.55935	27.1997	10.1388	27.1643	23.8042	5.31581	0.0715182	8.0602	2.17825	6.18956	2.96648	3.01364	7.82506	31.0231	11.9293	28.6295	28.3469	Contig2944	-0.0991857
dd_Smed_v6_10622_0_1	1805	-0.893038	1.73401	1.17836	0.27769	0.428591	-0.0508623	1.73401	0.00391237	0.950126	0.975905	2.97925	0	2.72016	2.66078	5.34004	2.34919	4.03313	3.29054	4.84668	2.00177	4.43148	4.28044	1.31799	0	1.15236	1.31035	2.34985	1.28162	1.81571	1.64946	4.01109	1.42889	3.67245	2.86039	1.2435	0	1.00808	1.05269	2.27484	1.08355	1.63788	1.35021	4.57492	1.68123	3.87054	3.40625	NA	NA
dd_Smed_v6_10623_0_1	1947	-2.81355	0.76905	5.91207	0.0150375	0.0402717	-1.92314	0.76905	2.99819	0.0833575	0.187273	0	1.3287	0.632595	0	0.912827	0.469838	0.925029	1.30778	3.18686	3.20766	2.96518	4.41526	0	0.629614	0.248446	0	0.372387	0.23763	0.386075	0.607741	2.44507	2.12267	2.27808	2.73529	0	0.520683	0.21734	0	0.360501	0.200905	0.348264	0.497483	2.78878	2.49754	2.40096	3.25728	NA	NA
dd_Smed_v6_10624_0_1	4838	-4.33082	1.47728	13.272	0.000269398	0.00111389	-1.59811	1.47728	2.31602	0.128047	0.259343	0.638412	0.372037	0.126519	0	4.15336	2.0203	1.55405	0	7.03765	4.84767	3.64945	7.8868	0.10537	0.0709468	0.0199969	0	0.681877	0.411216	0.261025	0	2.17298	1.291	1.12836	1.96629	0.0994145	0.0586721	0.0174932	0	0.660113	0.347664	0.23546	0	2.47844	1.519	1.18922	2.34153	NA	NA
dd_Smed_v6_10625_0_1	2820	-1.101	1.69208	1.50503	0.219899	0.360534	-0.624787	1.69208	0.494754	0.481814	0.662595	2.97925	4.19871	1.13867	0	2.92105	1.69142	1.77606	5.18892	4.04997	5.49885	2.34608	5.96566	0.84361	1.37366	0.30876	0	0.822738	0.590637	0.511788	1.66487	2.14535	2.51236	1.24445	2.55166	0.795927	1.136	0.270102	0	0.796478	0.499356	0.461664	1.36282	2.44692	2.95605	1.31158	3.03861	Contig4056	0.209107
dd_Smed_v6_10627_0_1	3328	-7.84359	-1.09049	15.5235	8.15e-05	0.000375057	-7.84359	-1.09049	16.241	5.58e-05	0.000307065	0	0	0	0	0	0	0	0	1.42745	1.25412	0.749441	1.04483	0	0	0	0	0	0	0	0	0.640725	0.485531	0.336851	0.378684	0	0	0	0	0	0	0	0	0.730791	0.571277	0.355021	0.45095	NA	NA
dd_Smed_v6_10628_0_1	2907	-0.958099	2.55596	0.988246	0.320172	0.475928	-0.987258	2.55596	1.04941	0.305643	0.494754	4.93705	8.87575	3.92209	0	3.87952	0.140951	2.88609	10.4622	11.7847	6.82532	7.55958	8.29125	1.35614	2.8169	1.03168	0	1.06	0.0477467	0.806766	3.25634	6.05578	3.02509	3.88988	3.44024	1.27949	2.32955	0.902509	0	1.02616	0.0403676	0.727752	2.66556	6.90703	3.55933	4.09971	4.09676	NA	NA
dd_Smed_v6_1063_0_1	2369	-0.975437	5.72143	12.3684	0.000436671	0.00173244	-0.345502	5.72143	1.58334	0.208281	0.376338	32.3462	33.2176	38.0822	36.4083	56.3671	47.5476	43.3283	69.481	76.4847	70.1826	43.6957	85.0022	10.9029	12.9365	12.2922	13.6613	18.8987	19.7643	14.8624	26.537	48.2285	38.1702	27.5904	43.2791	10.2866	10.6983	10.7532	10.975	18.2955	16.7098	13.4068	21.7226	55.008	44.9112	29.0786	51.5383	Contig1538	-1.27885
dd_Smed_v6_10631_0_1	2639	-0.743138	2.74563	2.27218	0.131715	0.242935	-0.0179985	2.74563	0.0013618	0.970563	0.985188	6.38412	5.10223	5.25054	1.64081	5.75081	6.34281	5.95719	12.3184	9.95894	6.05355	6.2562	8.49348	1.93172	1.78374	1.52138	0.552682	1.73086	2.3668	1.83436	4.22344	5.63727	2.9555	3.54614	3.88203	1.82254	1.47513	1.33089	0.444005	1.67561	2.00102	1.6547	3.45721	6.42969	3.47745	3.73742	4.62287	Contig4980	0.102725
dd_Smed_v6_10632_0_1	4628	-0.0779489	4.45576	0.0762895	0.78239	0.865982	0.356984	4.45576	1.60612	0.205038	0.371807	24.3448	13.4465	19.3574	19.8228	28.252	26.2639	19.2036	30.4164	19.5195	21.5371	22.19	18.0318	4.20045	2.68057	3.19835	3.80739	4.84873	5.58837	3.37188	5.94655	6.30044	5.99591	7.17212	4.69958	3.96303	2.2168	2.79791	3.05872	4.69397	4.72471	3.04164	4.8677	7.18608	7.0548	7.55899	5.59642	NA	NA
dd_Smed_v6_10633_0_1	5867	-0.962104	3.57588	3.95412	0.0467568	0.104616	-0.863817	3.57588	3.20855	0.0732544	0.168406	8.08655	10.8422	14.6129	1.86255	14.4683	9.81962	8.32526	5.23111	13.5774	16.4724	16.9439	21.8741	1.1006	1.70496	1.90456	0.282193	1.95873	1.64815	1.15309	0.806731	3.45696	3.61744	4.31997	4.49704	1.03839	1.40998	1.6661	0.226704	1.89621	1.39344	1.04016	0.660371	3.9429	4.25629	4.55299	5.35524	NA	NA
dd_Smed_v6_10635_0_1	2042	-1.8319	1.76524	2.06758	0.15046	0.269124	-3.35216	1.76524	6.11752	0.0133849	0.0411765	0	7.01556	0	1.06431	0.912827	1.22158	0	0.674982	8.39871	8.00709	6.06069	6.3364	0	3.1697	0	0.463307	0.355063	0.589094	0	0.29908	6.144	5.05218	4.43967	3.74283	0	2.62131	0	0.372204	0.34373	0.498052	0	0.24482	7.00766	5.94441	4.67915	4.4571	PL06023A1G01	0.187334
dd_Smed_v6_10636_0_1	666	0.341146	2.88973	0.458661	0.49825	0.646294	-0.446179	2.88973	0.78005	0.377126	0.56785	4.38376	20.3558	6.76876	5.67633	5.20312	5.45012	6.77121	4.09208	8.00035	5.01649	10.4922	5.83084	5.25601	28.1984	7.77155	7.57615	6.20528	8.05844	8.2618	5.55931	17.9444	9.70479	23.5654	10.5602	4.95892	23.3198	6.79852	6.08641	6.00722	6.81303	7.45265	4.55072	20.4669	11.4187	24.8366	12.5754	Contig4064	-0.172852
dd_Smed_v6_10637_0_1	2505	0.192434	2.64174	0.156255	0.692628	0.801335	0.427098	2.64174	0.771301	0.379815	0.570596	4.17096	7.65334	3.79557	8.60319	7.30262	5.87298	7.28923	8.0576	4.6807	5.88473	8.17868	2.46041	1.32957	2.81874	1.15862	3.05286	2.31549	2.30871	2.36459	2.91037	2.79125	3.02677	4.88382	1.18471	1.25442	2.33107	1.01356	2.45256	2.24158	1.95191	2.13301	2.38236	3.18361	3.5613	5.14726	1.4108	NA	NA
dd_Smed_v6_10638_0_1	4811	-2.44609	2.46399	8.79581	0.00301923	0.00992507	-1.40148	2.46399	3.10933	0.077845	0.17713	3.23462	0	0.506076	3.85813	4.88363	2.06729	3.2561	5.5686	6.63929	12.2277	9.15621	13.6839	0.536872	0	0.0804364	0.712848	0.806267	0.42314	0.549978	1.04728	2.06149	3.27468	2.84685	3.43075	0.506527	0	0.0703655	0.572677	0.780533	0.357745	0.496114	0.857276	2.35127	3.853	3.00041	4.08546	NA	NA
dd_Smed_v6_10640_0_1	2243	-2.69319	1.57267	4.20468	0.0403126	0.092854	-3.56018	1.57267	6.79967	0.00911746	0.02966	0.851216	3.40148	0	0.0443463	2.00822	0.0469838	0.296009	0	6.87167	7.83827	4.72473	8.45977	0.303036	1.39911	0	0.0175745	0.711138	0.0206271	0.10724	0	4.57644	4.50247	3.15088	4.54928	0.285907	1.15705	0	0.0141187	0.68844	0.0174392	0.0967375	0	5.21975	5.29762	3.32085	5.41745	NA	NA
dd_Smed_v6_10644_0_1	694	0.0588499	2.93375	0.0207036	0.885589	0.93035	-0.0442239	2.93375	0.0117218	0.913784	0.955918	5.70314	9.77926	10.6276	5.32156	7.30262	9.02089	5.47617	7.4248	7.86756	5.40237	8.43935	8.42607	6.56203	13.0005	11.7098	6.81608	8.35778	12.8	6.4121	9.68002	16.9346	10.0296	18.1901	14.6446	6.19113	10.7512	10.2437	5.4758	8.09102	10.8218	5.78411	7.92384	19.3151	11.8009	19.1712	17.4394	NA	NA
dd_Smed_v6_10645_0_1	1106	-1.90925	2.56898	12.5619	0.000393693	0.00157862	-0.846076	2.56898	2.64317	0.103996	0.222417	4.04327	1.48815	3.60579	1.10866	4.06208	3.66474	4.77315	8.90133	10.9548	8.24827	9.15621	10.145	2.91918	1.24138	2.49298	0.891041	2.91719	3.26292	3.50697	7.282	14.796	9.60877	12.3835	11.0639	2.75418	1.0266	2.18084	0.715831	2.82408	2.75865	3.16351	5.96087	16.8759	11.3057	13.0515	13.1753	Contig1065	-0.106681
dd_Smed_v6_10646_0_1	1175	0.00185534	2.15153	8.67e-06	0.99765	0.998706	-0.432866	2.15153	0.471546	0.492277	0.671361	4.68169	5.68686	7.90743	0.886927	4.47285	2.39617	3.47811	3.79677	2.45654	5.11296	3.77979	7.75198	3.18161	4.46526	5.14601	0.670973	3.02356	2.00816	2.4054	2.92367	3.12306	5.60654	4.81187	7.95771	3.00178	3.69271	4.50171	0.539036	2.92706	1.69781	2.16982	2.39324	3.56207	6.59667	5.07143	9.47633	NA	NA
dd_Smed_v6_10647_0_1	2039	-2.18092	1.57957	3.32618	0.0681849	0.143607	-3.64132	1.57957	8.16234	0.00427692	0.0154218	1.02146	0	2.46712	2.3947	1.36924	0	0	0.759355	7.80117	7.0665	6.90789	4.95453	0.400025	0	0.925221	1.04397	0.533377	0	0	0.33696	5.71528	4.46527	5.06772	2.93088	0.377414	0	0.80938	0.838691	0.516353	0	0	0.275828	6.51867	5.25384	5.34107	3.4902	NA	NA
dd_Smed_v6_1065_0_1	2125	1.59019	5.20335	27.5732	1.51e-07	1.16e-06	1.63203	5.20335	29.0015	7.23e-08	6.83e-07	65.9692	50.7565	32.8949	37.2066	34.0485	57.4612	55.6497	45.2238	12.6811	17.606	13.4248	18.3351	24.7894	22.0366	11.837	15.5638	12.7265	26.6278	21.2807	19.2557	8.91438	10.6748	9.45001	10.4073	23.3882	18.224	10.355	12.5034	12.3203	22.5125	19.1965	15.7622	10.1675	12.56	9.95974	12.3934	Contig5397	0.500896
dd_Smed_v6_10650_0_1	795	1.92322	0.969146	4.43932	0.0351202	0.0826031	1.3699	0.969146	2.31686	0.127978	0.259312	1.65987	3.56093	0.822373	5.58764	0.593338	2.58411	3.77412	0.970287	0.497947	0.916474	1.36854	0.269634	1.66721	4.13246	0.790996	6.24765	0.592798	3.20083	3.85772	1.10429	0.935644	1.4853	2.57499	0.409092	1.57298	3.41749	0.69196	5.01914	0.573877	2.70615	3.4799	0.903947	1.06717	1.7476	2.71389	0.487162	Contig5579	0.17265
dd_Smed_v6_10653_0_1	1689	0.131849	1.41811	0.0354636	0.850628	0.907115	-0.120583	1.41811	0.0296517	0.863283	0.927538	2.46853	4.5176	1.70801	2.61643	2.0995	4.36949	1.81306	1.2234	3.45243	3.28001	2.54158	1.04483	1.16705	2.46769	0.773272	1.377	0.987322	2.54754	0.872297	0.655377	3.05345	2.50211	2.25091	0.746157	1.10109	2.04075	0.676455	1.10624	0.955809	2.15382	0.786865	0.536476	3.48267	2.94399	2.37233	0.888551	NA	NA
dd_Smed_v6_10654_1_1	1133	-0.142406	1.09329	0.0234142	0.878385	0.926189	1.17897	1.09329	1.58204	0.208466	0.376461	3.31974	0	0.948892	1.06431	3.4231	4.41648	2.70108	2.86867	1.46064	2.26707	1.40113	0.775198	2.33969	0	0.640412	0.835015	2.39973	3.83853	1.93727	2.29088	1.92579	2.57807	1.84983	0.82527	2.20744	0	0.56023	0.670821	2.32313	3.2453	1.74754	1.87526	2.1965	3.03336	1.94961	0.982762	NA	NA
dd_Smed_v6_10655_0_1	1500	-2.33617	4.58449	23.004	1.62e-06	1.04e-05	-2.08948	4.58449	18.7765	1.47e-05	9.09e-05	20.2589	4.94278	10.9439	3.45901	16.2483	7.14154	16.3175	7.29824	60.9155	30.2919	62.3665	46.613	10.7847	3.04013	5.57896	2.04982	8.60378	4.68834	8.83986	4.40228	60.664	26.0193	62.1934	37.4826	10.1751	2.51415	4.88045	1.64675	8.32917	3.96378	7.97409	3.6036	69.1916	30.6143	65.5482	44.6356	PL030003A20A04	-0.525101
dd_Smed_v6_10656_0_1	1377	3.97235	4.52991	103.737	2.31e-24	8.38e-23	3.80588	4.52991	96.603	8.47e-23	3.27e-21	40.7732	21.3656	27.3913	51.8409	24.2812	32.6068	32.302	36.8287	2.62252	1.71236	3.32361	1.34817	23.6442	14.315	15.2108	33.4652	14.0058	23.3181	19.0624	24.1993	2.84498	1.60222	3.61044	1.18093	22.3078	11.8384	13.3063	26.8848	13.5588	19.7143	17.1955	19.809	3.2449	1.88517	3.80519	1.40629	Contig2353	1.85825
dd_Smed_v6_10657_0_1	1105	0.591957	1.68259	1.02622	0.311049	0.465581	0.355645	1.68259	0.371954	0.541941	0.713618	3.74535	3.02945	4.30164	3.90248	3.10361	4.36949	2.92309	2.32025	3.05408	1.59177	1.88989	3.40413	2.70653	2.52937	2.97677	3.1393	2.23089	3.89393	2.14963	1.89987	4.12869	1.856	2.55835	3.71584	2.55355	2.09176	2.60406	2.522	2.15968	3.29213	1.93909	1.55519	4.70906	2.18378	2.69635	4.42496	NA	NA
dd_Smed_v6_10658_0_1	981	0.0900873	4.42058	0.112467	0.737353	0.8332	0.0075747	4.42058	0.000796603	0.977483	0.987625	19.578	21.9502	23.8488	23.4149	18.8042	25.8411	17.6125	21.5994	22.2416	17.5336	23.754	19.8855	15.9361	20.6434	18.5896	21.2167	15.2251	25.9394	14.5893	19.9216	33.8682	23.0283	36.2203	24.4501	15.0353	17.0719	16.2621	17.0447	14.7391	21.9306	13.1605	16.3073	38.6291	27.0952	38.1741	29.1161	Contig3734	-0.322471
dd_Smed_v6_10659_0_1	779	3.23166	0.450659	4.16995	0.0411471	0.0944778	4.91011	0.450659	8.321	0.00391893	0.014268	1.14914	0	2.15082	0.310424	0.775903	1.40951	1.96106	7.4248	0	0	0	0.370747	1.17793	0	2.11125	0.35422	0.791119	1.78177	2.04567	8.62379	0	0	0	0.574055	1.11135	0	1.84691	0.284568	0.765869	1.5064	1.84532	7.05923	0	0	0	0.683605	NA	NA
dd_Smed_v6_1066_0_1	518	-7.98769	3.01281	111.513	4.57e-26	1.83e-24	-5.04636	3.01281	65.7991	4.99e-16	1.17e-14	0.170243	0.106296	0.0632595	0	0.410772	1.40951	0.222007	0.759355	22.8724	25.1789	29.7495	14.6614	0.262436	0.189322	0.0933831	0	0.629859	2.67953	0.348273	1.32637	65.9593	62.6279	85.9082	34.1395	0.247602	0.156567	0.0816912	0	0.609755	2.26542	0.314163	1.08574	75.2312	73.6881	90.5422	40.6546	PL05011B2A05	-1.5046
dd_Smed_v6_10660_0_1	2744	-2.50257	1.97735	9.87902	0.00167174	0.00588423	-1.19701	1.97735	2.48139	0.1152	0.239517	2.46853	0.212593	0.506076	1.8182	6.52672	0.939676	1.14704	3.88115	6.5397	6.12591	7.36407	8.62829	0.718351	0.0714787	0.141028	0.588996	1.88922	0.33722	0.339684	1.27975	3.56015	2.87638	4.01438	3.79275	0.677748	0.059112	0.12337	0.473179	1.82892	0.285104	0.306416	1.04758	4.0606	3.38436	4.23091	4.51654	NA	NA
dd_Smed_v6_10661_0_1	4073	1.25923	4.51735	19.1279	1.22e-05	6.64e-05	0.702282	4.51735	6.05192	0.0138912	0.042531	27.2815	33.8022	27.6444	41.8629	21.4058	26.076	22.8297	18.4776	10.3241	11.89	16.618	15.7399	5.34855	7.65673	5.18997	9.1363	4.17435	6.30443	4.55479	4.10471	3.78645	3.76123	6.10309	4.66123	5.04624	6.33202	4.54017	7.33978	4.04112	5.3301	4.1087	3.36002	4.31871	4.42547	6.43229	5.55076	NA	NA
dd_Smed_v6_10662_0_1	1765	1.35954	0.506558	1.33256	0.248351	0.395387	0.00361066	0.506558	9.66e-06	0.99752	0.99903	0.936337	4.83648	0.442816	2.88251	2.19079	0.0939676	1.25804	0	0.497947	0.988828	1.23821	0.808903	0.423614	2.52812	0.191845	1.45172	0.985887	0.0524267	0.579205	0	0.421437	0.721832	1.04938	0.552796	0.399671	2.09072	0.167826	1.16626	0.95442	0.0443243	0.522478	0	0.480679	0.849309	1.10598	0.658289	PL06016A2E01	-0.0413219
dd_Smed_v6_10663_0_1	1027	0.878123	3.72692	4.12925	0.0421479	0.0962544	0.975295	3.72692	5.08453	0.0241402	0.0680629	12.4277	16.0507	11.0704	20.8871	13.9206	30.7274	12.8394	7.21387	6.97126	10.5153	10.3944	4.98823	9.66285	14.4191	8.24263	18.0785	10.7661	29.4628	10.1591	6.35549	10.1399	13.1921	15.1396	5.85854	9.11668	11.9244	7.21062	14.5237	10.4225	24.9094	9.16417	5.20245	11.5653	15.5218	15.9562	6.97656	NA	NA
dd_Smed_v6_10664_0_1	394	-0.351841	-0.00340935	0.0796768	0.777736	0.862211	-0.309286	-0.00340935	0.0617874	0.803693	0.893253	1.23426	0	0.885633	1.19735	0	0.939676	0.96203	1.51871	1.16188	1.18177	1.56405	0.337043	2.50147	0	1.71882	2.70135	0	2.34856	1.98415	3.48762	4.40513	3.86453	5.93798	1.03182	2.36008	0	1.50362	2.17017	0	1.98559	1.78983	2.85488	5.02435	4.54701	6.25828	1.22872	NA	NA
dd_Smed_v6_10665_0_1	962	1.62758	1.45964	2.66852	0.102351	0.198705	-0.168148	1.45964	0.0296174	0.863361	0.927547	1.70243	11.9583	1.26519	5.05548	1.64309	2.77204	1.33204	0	1.06229	0.74765	2.02023	2.62893	1.41312	11.4685	1.00566	4.67135	1.35662	2.83755	1.12519	0	1.64953	1.00134	3.14131	3.29623	1.33324	9.48434	0.879751	3.7528	1.31332	2.39902	1.01499	0	1.88141	1.17818	3.31075	3.92527	NA	NA
dd_Smed_v6_10666_0_1	2155	-0.184598	3.44576	0.214604	0.643183	0.765502	-0.57835	3.44576	2.09343	0.147933	0.289605	8.21423	16.848	14.866	4.92244	9.58469	6.48377	8.17725	9.82943	12.5483	10.5153	15.7057	12.1335	3.04371	7.21294	5.27496	2.03043	3.53267	2.96278	3.08349	4.12697	8.69823	6.28689	10.9017	6.79131	2.87167	5.96502	4.61451	1.63118	3.41991	2.50489	2.7815	3.37824	9.92094	7.39717	11.4897	8.08734	Contig6243	-0.435155
dd_Smed_v6_10667_0_1	1813	1.05299	3.61906	9.03518	0.00264833	0.00886555	1.6776	3.61906	22.4517	2.15e-06	1.57e-05	13.3641	13.5528	12.7784	8.78058	25.5135	22.1764	12.1364	14.934	5.6434	5.28179	7.16856	5.25787	5.88606	6.89672	5.38954	4.30507	11.1775	12.0451	5.43969	7.45296	4.64984	3.75356	5.91451	3.49804	5.55337	5.70351	4.71475	3.45854	10.8207	10.1836	4.90693	6.10081	5.30346	4.41644	6.23354	4.16559	NA	NA
dd_Smed_v6_10669_0_1	3492	0.200315	2.194	0.129719	0.718723	0.820084	0.581339	2.194	1.09409	0.295567	0.483022	1.57475	6.43093	3.92209	5.09983	6.25287	7.28249	3.3671	5.2733	4.97947	4.05178	2.7045	3.06709	0.360098	1.69907	0.858847	1.29818	1.42225	2.05364	0.783547	1.36634	2.13012	1.49497	1.1585	1.05941	0.339744	1.40511	0.751316	1.04292	1.37686	1.73626	0.706808	1.11845	2.42955	1.75898	1.22099	1.26159	NA	NA
dd_Smed_v6_1067_0_1	536	2.53239	6.33974	84.9208	3.11e-20	8.83e-19	2.21787	6.33974	66.6631	3.22e-16	7.71e-15	135.514	118.361	124.495	112.861	78.6857	103.129	127.395	85.7649	24.1338	18.7154	24.6338	17.4251	201.884	203.73	177.606	187.17	116.601	189.468	193.139	144.776	67.2599	44.9877	68.7465	39.2125	190.473	168.483	155.369	150.366	112.88	160.187	174.223	118.51	76.7146	52.9326	72.4548	46.6956	Contig6838	2.22917
dd_Smed_v6_10670_0_1	3534	4.88952	0.741687	8.25581	0.00406217	0.0129548	3.53635	0.741687	4.88436	0.0271011	0.0749002	2.59621	8.29112	2.72016	0	1.55181	2.20824	1.55405	0	0	0.168824	0	0.269634	0.586619	2.1645	0.588573	0	0.348773	0.615316	0.357339	0	0	0.06155	0	0.0920284	0.553462	1.79002	0.514881	0	0.337641	0.520221	0.322342	0	0	0.0724199	0	0.109591	NA	NA
dd_Smed_v6_10672_0_1	1370	0.298479	3.04789	0.454128	0.500381	0.648434	0.414358	3.04789	0.877176	0.348976	0.539779	9.06545	6.85611	11.703	6.34153	13.7381	8.17518	10.1013	4.76706	10.7225	7.18709	4.69215	4.98823	5.28387	4.6171	6.53205	4.11461	7.96483	5.87619	5.99156	3.14834	11.6915	6.75916	5.12313	4.39177	4.98521	3.81829	5.71421	3.30553	7.71061	4.96804	5.40476	2.57715	13.3349	7.95284	5.39948	5.22988	NA	NA
dd_Smed_v6_10673_0_1	811	-10.5499	1.34925	55.4559	9.56e-14	1.55e-12	-10.5499	1.34925	57.576	3.25e-14	6.51e-13	0	0	0	0	0	0	0	0	4.94627	8.80298	6.8753	8.6957	0	0	0	0	0	0	0	0	9.11071	13.9852	12.6811	12.9329	0	0	0	0	0	0	0	0	10.3914	16.455	13.3651	15.401	NA	NA
dd_Smed_v6_10674_0_1	1198	0.941226	0.373081	0.533103	0.465305	0.6169	2.8216	0.373081	4.32599	0.0375347	0.098101	1.48963	0	1.32845	0	4.15336	3.66474	0.703022	1.89839	0.0663929	0.289413	0.293259	0.808903	0.992897	0	0.847931	0	2.75369	3.01235	0.476864	1.43377	0.0827865	0.311259	0.366167	0.814428	0.936776	0	0.741767	0	2.6658	2.5468	0.430161	1.17365	0.0944238	0.366227	0.385919	0.96985	NA	NA
dd_Smed_v6_10675_0_1	1461	-4.16035	1.49641	17.3666	3.08e-05	0.000153901	-1.61328	1.49641	3.30613	0.069022	0.160445	1.06402	0	0.126519	0.0886927	1.23232	1.08063	1.70205	3.7124	6.50651	6.97003	3.84496	6.37011	0.581544	0	0.0662183	0.0539626	0.669953	0.728358	0.946685	2.29909	6.65262	6.14674	3.93664	5.25908	0.548674	0	0.0579275	0.0433516	0.648569	0.615792	0.853968	1.88198	7.58777	7.23226	4.14898	6.2627	PL05006A1F01	0.0357351
dd_Smed_v6_10676_0_1	1528	-2.85761	1.49249	6.94836	0.00838963	0.0242318	-3.70318	1.49249	10.7865	0.00102245	0.00429102	1.1917	0.850371	0.126519	1.50778	1.00411	0	1.03603	0	7.43601	3.90707	8.40677	7.14531	0.62277	0.513449	0.0633147	0.877139	0.521951	0	0.550976	0	7.26961	3.29449	8.22982	5.64041	0.587569	0.424616	0.0553875	0.704662	0.505292	0	0.497014	0	8.2915	3.87631	8.67374	6.7168	PL05005B2G02	-0.341726
dd_Smed_v6_10677_0_1	4643	-2.49482	2.84598	20.1688	7.09e-06	4.02e-05	-2.22067	2.84598	16.4129	5.09e-05	0.000282448	2.12804	0.850371	3.60579	4.25725	2.00822	6.29583	2.92309	1.89839	12.7806	16.4724	19.1922	12.7402	0.365986	0.168975	0.593847	0.815052	0.343546	1.33528	0.511595	0.369945	4.11196	4.57108	6.18316	3.30972	0.345299	0.13974	0.519495	0.654784	0.332581	1.12892	0.46149	0.302828	4.68997	5.37834	6.51668	3.94133	Contig4601	0.215206
dd_Smed_v6_1068_0_1	665	6.01543	8.76091	227.78	1.82e-51	2.68e-49	6.25271	8.76091	240.79	2.65e-54	5.26e-52	477.574	577.88	644.171	672.468	682.019	652.934	550.17	911.015	4.87988	8.53768	9.25396	13.9873	573.459	801.73	740.717	898.887	814.604	966.866	672.292	1239.52	10.9618	16.5416	20.8157	25.3702	541.046	663.021	647.976	722.134	788.604	817.441	606.449	1014.64	12.5027	19.4629	21.9385	30.2118	Contig6709	2.27694
dd_Smed_v6_10681_0_1	3048	-0.712707	2.87497	2.96404	0.0851348	0.171343	-0.836712	2.87497	4.07966	0.0434025	0.110299	8.51216	5.79315	5.3138	4.83375	4.79234	4.13457	7.77024	5.73735	12.2163	7.18709	10.5573	10.1787	2.23002	1.75353	1.3331	1.40969	1.24883	1.33578	2.07158	1.70313	5.98714	3.03807	5.18112	4.02801	2.10397	1.45014	1.16619	1.1325	1.20897	1.12934	1.86869	1.39414	6.82875	3.5746	5.46059	4.7967	NA	NA
dd_Smed_v6_10682_0_1	1263	-5.79822	-0.19496	9.59178	0.00195451	0.00675854	-2.02592	-0.19496	1.75499	0.18525	0.344151	0	0	0.126519	0	1.04975	0	0	0.759355	2.8217	2.02589	0.716856	1.85374	0	0	0.0765993	0	0.660169	0	0	0.543992	3.33735	2.06668	0.849011	1.77034	0	0	0.0670088	0	0.639098	0	0	0.445299	3.80648	2.43166	0.894807	2.10819	Contig6130	0.0658935
dd_Smed_v6_10683_0_1	2485	-1.52022	0.432933	1.01908	0.312737	0.467522	-1.46556	0.432933	0.950442	0.329607	0.519914	0	0	0	3.0599	0.0456414	1.31555	0.481015	1.34996	2.15777	3.61766	1.88989	1.17965	0	0	0	1.09455	0.0145883	0.521313	0.157295	0.491526	1.2971	1.87569	1.13762	0.572585	0	0	0	0.879323	0.0141227	0.440746	0.14189	0.402352	1.47943	2.20694	1.19898	0.681855	NA	NA
dd_Smed_v6_10684_0_1	1503	-1.95383	0.150585	1.55943	0.211749	0.350672	-3.57429	0.150585	4.56863	0.0325627	0.0871149	0.978898	0	1.32845	0.0443463	0	0	0.740023	0	2.39015	1.97766	2.24832	2.52782	0.52007	0	0.675863	0.0262273	0	0	0.4001	0	2.37553	1.69532	2.23761	2.02862	0.490674	0	0.591242	0.0210701	0	0	0.360915	0	2.70945	1.99472	2.35831	2.41575	NA	NA
dd_Smed_v6_10685_0_1	683	0.391491	0.138825	0.126157	0.72245	0.822722	1.05325	0.138825	0.905612	0.341281	0.532748	1.65987	0.690926	0.822373	0.48781	0.0912827	1.12761	3.73712	0.843728	0.464751	0.627061	1.59663	0.101113	1.9406	0.933304	0.920706	0.63487	0.106155	1.62576	4.4463	1.11772	1.01647	1.1829	3.49679	0.178566	1.83092	0.771831	0.80543	0.510032	0.102767	1.37451	4.01083	0.914938	1.15935	1.39181	3.68541	0.212643	NA	NA
dd_Smed_v6_10687_0_1	1124	-1.57191	0.465627	1.35648	0.244148	0.390638	-3.65879	0.465627	6.17129	0.012984	0.040103	0	3.02945	0.253038	0.399117	0.775903	0	0.0370011	0.0421864	2.65572	2.77354	2.57417	2.96598	0	2.48662	0.172144	0.315638	0.548294	0	0.0267505	0.0339591	3.52948	3.17928	3.42574	3.18284	0	2.0564	0.150591	0.253572	0.530793	0	0.0241306	0.0277982	4.02561	3.74074	3.61053	3.79024	NA	NA
dd_Smed_v6_1069_0_1	1763	1.35589	4.26127	6.92927	0.00847961	0.0244205	1.31814	4.26127	6.5626	0.0104144	0.0332371	40.8583	24.9265	7.52788	23.5923	9.35648	36.6944	32.117	16.2839	7.63519	14.3259	12.3495	3.53895	18.506	13.0443	3.26507	11.8952	4.21534	20.4958	14.8035	8.35715	6.46937	10.4696	10.4781	2.42123	17.46	10.7875	2.85627	9.55619	4.08079	17.3283	13.3537	6.84096	7.37877	12.3186	11.0432	2.88328	PL06018A1D10	-0.510096
dd_Smed_v6_10690_0_1	443	0.00226896	2.53737	1.92e-05	0.996506	0.998082	0.308904	2.53737	0.356584	0.550409	0.719349	4.08583	5.04908	4.11187	7.98234	2.28207	9.72565	8.36226	5.90609	5.27824	6.70473	3.35619	5.86454	7.36479	10.5153	7.09754	16.017	4.09163	21.6189	15.3392	12.0628	17.7984	19.5001	11.3325	15.9678	6.94852	8.696	6.2089	12.8675	3.96104	18.2778	13.8369	9.87431	20.3003	22.9439	11.9438	19.015	NA	NA
dd_Smed_v6_10693_0_1	2599	-0.210392	2.40539	0.214218	0.643481	0.765649	-0.744461	2.40539	2.64479	0.10389	0.2223	4.3412	5.58056	4.11187	7.93799	3.1949	3.80569	3.95912	4.21864	6.80528	6.07767	5.99553	6.57233	1.33379	1.981	1.20978	2.71494	0.976388	1.44194	1.23787	1.46864	3.91142	3.01294	3.45069	3.05019	1.2584	1.63826	1.05831	2.18108	0.945224	1.21909	1.11664	1.2022	4.46124	3.54504	3.63682	3.63227	NA	NA
dd_Smed_v6_10696_0_1	5767	-0.412301	1.7537	0.232875	0.6294	0.754705	0.12103	1.7537	0.020242	0.886863	0.941216	4.72425	2.12593	3.60579	0	3.37746	2.30221	6.66021	2.7843	3.28645	3.97943	3.7472	2.89857	0.654133	0.340103	0.478105	0	0.465171	0.393109	0.93847	0.436835	0.851279	0.88906	0.971945	0.606243	0.61716	0.281261	0.418244	0	0.450323	0.332356	0.846558	0.357583	0.970942	1.04607	1.02437	0.721936	NA	NA
dd_Smed_v6_10698_0_1	1582	-0.0263491	1.624	0.00161232	0.967971	0.982253	-0.67019	1.624	1.03008	0.31014	0.4994	2.63877	4.99593	2.15082	3.76944	1.00411	1.7384	2.92309	2.99523	4.08317	2.60472	5.44159	1.68521	1.33192	2.91355	1.03961	2.118	0.504135	1.08209	1.50148	1.71307	3.85554	2.12136	5.14522	1.28488	1.25664	2.40947	0.909447	1.70152	0.488044	0.914854	1.35442	1.40228	4.39751	2.496	5.42275	1.53008	Contig3939	0.294183
dd_Smed_v6_10699_0_1	1199	1.28365	4.36783	18.2862	1.9e-05	9.86e-05	0.707059	4.36783	5.64846	0.0174707	0.0517814	26.8559	43.6347	23.8488	24.3018	20.7668	19.7802	18.2046	20.7979	12.6147	11.8659	14.5978	9.63942	17.8856	33.5757	15.2097	18.0167	13.757	16.2454	12.338	15.6946	15.7163	12.751	18.2118	9.69717	16.8746	27.7667	13.3054	14.4739	13.3179	13.7347	11.1296	12.8472	17.9256	15.0028	19.1941	11.5477	Contig3365	0.290391
dd_Smed_v6_107_0_1	775	-6.16798	8.36004	216.472	5.32e-49	6.35e-47	-6.037	8.36004	210.195	1.25e-47	1.64e-45	7.9163	19.8774	14.7395	10.7762	11.1821	23.3979	10.4713	13.2887	981.653	925.518	1104.09	818.643	8.1565	23.663	14.5429	12.36	11.4603	29.73	10.9795	15.5143	1892.13	1538.66	2131.02	1274.11	7.69548	19.569	12.7221	9.92956	11.0945	25.1353	9.90419	12.6996	2158.1	1810.39	2245.96	1517.25	Contig1820	-0.302709
dd_Smed_v6_1070_0_1	4228	-0.916281	6.56856	13.1566	0.000286515	0.00117651	-0.517435	6.56856	4.25076	0.0392328	0.10187	69.3741	86.5252	53.0114	61.6414	95.9382	83.4902	96.277	81.04	121.267	127.583	126.395	135.424	13.1022	18.8808	9.58754	12.9596	18.0231	19.4455	18.5042	17.3427	42.8451	38.8792	44.7176	38.6343	12.3617	15.6142	8.38714	10.4113	17.4478	16.4403	16.6919	14.1963	48.8678	45.7454	47.1297	46.0071	PL06017A2H04	-0.584367
dd_Smed_v6_10700_0_1	2246	-0.280649	2.34156	0.262543	0.608378	0.738669	-0.676234	2.34156	1.51007	0.219129	0.390761	4.21352	8.76945	2.78342	4.34594	4.7467	5.87298	1.44304	3.24835	5.34463	6.63238	6.12586	6.3364	1.49802	3.60226	0.947635	1.72	1.67863	2.57494	0.522099	1.30859	3.5547	3.80469	4.07983	3.40288	1.41335	2.97902	0.828987	1.38179	1.62505	2.17699	0.470965	1.07118	4.05438	4.47661	4.2999	4.05227	NA	NA
dd_Smed_v6_10703_0_1	1085	-9.34874	0.363134	22.0939	2.6e-06	1.6e-05	-3.06968	0.363134	5.00856	0.0252223	0.0705688	0	0	0	0	0.456414	0	1.03603	0	2.29056	3.52119	3.32361	3.60636	0	0	0	0	0.334119	0	0.775937	0	3.1536	4.18138	4.5821	4.00915	0	0	0	0	0.323454	0	0.699942	0	3.59689	4.91982	4.82926	4.77424	NA	NA
dd_Smed_v6_10704_0_1	1899	-1.19871	-0.128783	0.537996	0.463264	0.615188	-1.22305	-0.128783	0.561115	0.453811	0.636904	1.48963	0	0.822373	0	0	0	0.96203	1.30778	1.19507	2.09824	0.456181	1.5841	0.626377	0	0.331144	0	0	0	0.411667	0.623103	0.940079	1.42361	0.359333	1.00617	0.590973	0	0.289683	0	0	0	0.371349	0.510057	1.07222	1.67502	0.378715	1.19818	NA	NA
dd_Smed_v6_10707_0_1	1111	-3.51459	2.47037	16.8061	4.14e-05	0.000201867	-2.70248	2.47037	10.7332	0.00105231	0.00440507	0.808655	0.0531482	0.189778	3.50336	1.82565	0.704757	2.92309	2.61556	8.39871	12.1795	15.7708	16.3466	0.581209	0.0441353	0.130619	2.80302	1.3052	0.624661	2.13802	2.1301	11.2926	14.1245	21.2337	17.747	0.548358	0.0364994	0.114265	2.25185	1.26354	0.528122	1.92862	1.74365	12.88	16.619	22.379	21.1338	NA	NA
dd_Smed_v6_10708_0_1	1537	0.124661	3.02123	0.107406	0.743117	0.837484	0.0412466	3.02123	0.0117864	0.913548	0.955823	5.78827	10.7891	6.76876	10.377	8.1698	9.16184	8.17725	6.32796	8.56469	8.17592	6.84272	7.34753	3.00717	6.47624	3.3675	6.00143	4.22192	5.86986	4.32331	3.72512	8.32401	6.85366	6.65946	5.76608	2.8372	5.35577	2.94588	4.82134	4.08716	4.96269	3.89989	3.0493	9.49411	8.06403	7.01868	6.86646	Contig2957	0.0097804
dd_Smed_v6_10709_0_1	462	0.296223	3.13196	0.395093	0.529634	0.673893	0.704659	3.13196	2.23047	0.135312	0.270467	5.10729	18.0172	5.25054	4.83375	9.90418	14.1421	10.6933	9.32319	6.70569	7.76591	8.60228	3.9434	8.82738	35.9798	8.69029	9.30031	17.0274	30.1434	18.8085	18.2588	21.6818	21.6576	27.852	10.2954	8.32844	29.7548	7.60223	7.47154	16.4839	25.4848	16.9664	14.9463	24.7296	25.4824	29.3543	12.2601	NA	NA
dd_Smed_v6_10710_0_1	1604	-0.732991	3.10335	2.21788	0.136421	0.249898	-1.10637	3.10335	4.99029	0.0254899	0.0711962	2.08548	10.8954	9.61544	7.18411	5.06619	2.39617	7.95525	7.50917	12.4487	10.6359	12.8382	13.5154	1.03821	6.26686	4.58392	3.98129	2.5087	1.47107	4.03025	4.23583	11.5935	8.54341	11.9725	10.1634	0.979527	5.18262	4.01	3.19842	2.42863	1.24372	3.63553	3.46735	13.2232	10.0522	12.6183	12.1029	NA	NA
dd_Smed_v6_10711_0_1	848	0.865913	2.04004	2.38404	0.12258	0.230022	0.867332	2.04004	2.39692	0.121574	0.250039	5.70314	5.10223	3.98535	4.2129	4.15336	7.8463	3.92212	3.12179	3.98358	2.77354	2.24832	1.41558	5.37034	5.55106	3.59371	4.41612	3.89024	9.11145	3.75844	3.33088	7.01733	4.21404	3.96595	2.0135	5.0668	4.59066	3.14376	3.54775	3.76607	7.70331	3.39035	2.72658	8.00375	4.95825	4.17987	2.39775	Contig6348	0.013619
dd_Smed_v6_10712_0_1	761	-8.8523	0.0463381	17.4426	2.96e-05	0.000148072	-2.02241	0.0463381	1.93866	0.163814	0.313407	0	0	0	0	0	0.422854	1.77606	0	1.36106	2.07413	3.03035	2.56152	0	0	0	0	0	0.547173	1.89651	0	2.67169	3.51165	5.95651	4.06001	0	0	0	0	0	0.46261	1.71077	0	3.04725	4.13181	6.27781	4.83481	Contig5955	-0.0737368
dd_Smed_v6_10714_0_1	2039	-2.13485	2.66656	8.51817	0.00351618	0.0113793	-1.1661	2.66656	2.71167	0.0996168	0.215793	2.68133	0	5.37705	2.17297	3.4231	5.82599	5.51317	5.23111	9.46099	11.4077	13.9135	10.1113	1.05006	0	2.01651	0.947309	1.33344	2.81366	2.19719	2.32128	6.93129	7.20843	10.2071	5.98139	0.990713	0	1.76403	0.761035	1.29088	2.37882	1.982	1.90015	7.90562	8.48146	10.7577	7.12286	Contig4513	-0.000213946
dd_Smed_v6_10715_0_1	411	-4.09789	-0.285684	8.1489	0.00430873	0.0136648	-8.71307	-0.285684	21.284	3.96e-06	2.74e-05	0.212804	0	0.253038	0	0	0	0	0	1.69302	2.67707	2.54158	1.28076	0.413448	0	0.470778	0	0	0	0	0	6.1534	8.39224	9.2501	3.75872	0.390079	0	0.411835	0	0	0	0	0	7.01838	9.87433	9.74906	4.47602	PL08005B1G09	0.0697572
dd_Smed_v6_10716_0_1	3063	1.50396	1.62081	4.28956	0.038347	0.0889505	1.03943	1.62081	2.08732	0.148527	0.290312	2.97925	2.76371	4.30164	7.31715	3.69695	4.83933	2.99709	1.05466	1.26147	2.41177	1.98765	0.438156	0.776683	0.832447	1.07389	2.12349	0.958669	1.55581	0.795126	0.311542	0.61521	1.01449	0.970681	0.172542	0.732783	0.688424	0.939435	1.70593	0.92807	1.31537	0.717252	0.255021	0.701689	1.19366	1.02304	0.205469	NA	NA
dd_Smed_v6_10717_0_1	2727	-11.2511	2.07661	62.0314	3.38e-15	6.33e-14	-4.80388	2.07661	26.517	2.61e-07	2.26e-06	0	0	0	0	0.0912827	0.892692	0.703022	0	11.7516	13.2648	11.209	11.4595	0	0	0	0	0.0265874	0.322356	0.209491	0	6.43731	6.26721	6.14847	5.06865	0	0	0	0	0.0257388	0.272537	0.188974	0	7.3422	7.37402	6.48012	6.03593	NA	NA
dd_Smed_v6_10718_0_1	4034	-0.127849	0.658386	0.010149	0.919755	0.952037	-2.79529	0.658386	4.18208	0.0408536	0.105226	0	3.45463	2.3406	2.21732	0.228207	0.98666	0.0370011	0	1.09548	2.38766	0.749441	4.51637	0	0.790093	0.443674	0.488593	0.0449329	0.240852	0.00745353	0	0.405662	0.762599	0.277898	1.35041	0	0.653397	0.388124	0.392518	0.0434988	0.203629	0.00672354	0	0.462686	0.897275	0.292888	1.60812	NA	NA
dd_Smed_v6_10719_0_1	2654	-0.423096	2.13593	0.64614	0.421496	0.578132	-0.603921	2.13593	1.31351	0.25176	0.432416	2.42596	6.96241	2.59364	4.07986	3.10361	4.22854	3.2931	3.54366	5.74299	4.99237	6.2562	4.55008	0.729906	2.42031	0.747276	1.36647	0.928835	1.56895	1.00829	1.2081	3.23245	2.42363	3.5261	2.06791	0.68865	2.00157	0.653714	1.09777	0.899189	1.32647	0.909543	0.988919	3.68683	2.85165	3.7163	2.46254	NA	NA
dd_Smed_v6_1072_0_1	362	-2.83146	5.57597	45.852	1.28e-11	1.65e-10	-2.51895	5.57597	37.3023	1.01e-09	1.25e-08	15.1942	27.7433	11.8928	6.20849	15.4724	29.1769	21.0167	10.1247	104.502	118.418	124.896	86.62	33.516	70.707	25.1216	15.2452	33.9486	79.3688	47.1778	25.3061	431.234	421.473	516.088	288.618	31.6216	58.4738	21.9763	12.2474	32.865	67.1027	42.5573	20.715	491.852	495.906	543.926	343.696	NA	NA
dd_Smed_v6_10722_0_1	1217	-9.11562	0.128662	19.8711	8.28e-06	4.64e-05	-3.25988	0.128662	5.05526	0.0245513	0.0689482	0	0	0	0	0.182565	0.939676	0	0	2.15777	1.83295	3.71462	3.1345	0	0	0	0	0.119152	0.760338	0	0	2.64856	1.94053	4.56571	3.10664	0	0	0	0	0.115349	0.64283	0	0	3.02086	2.28323	4.81198	3.6995	Contig350	0.353824
dd_Smed_v6_10724_0_1	1735	3.05142	3.72768	51.5097	7.12e-13	1.05e-11	3.63999	3.72768	70.0594	5.75e-17	1.48e-15	22.9403	8.61	10.1215	18.5368	19.0781	35.0969	16.7245	19.7854	1.62663	2.29119	1.40113	1.92114	10.558	4.57842	4.46086	9.49707	8.73388	19.9199	7.83316	10.318	1.4005	1.70146	1.20799	1.33559	9.96125	3.7863	3.90234	7.62961	8.45512	16.8414	7.06599	8.44609	1.59737	2.00194	1.27315	1.59047	NA	NA
dd_Smed_v6_10725_0_1	1057	0.861823	1.28634	1.35596	0.244239	0.390734	0.108849	1.28634	0.0217962	0.88263	0.939193	3.95815	5.26167	2.97319	1.06431	1.91694	3.10093	1.36904	1.47652	2.52293	2.70119	1.14045	0.910015	2.9902	4.59262	2.1509	0.895054	1.44047	2.88892	1.05251	1.26391	3.56554	3.29261	1.61394	1.03845	2.82119	3.79804	1.8816	0.719054	1.3945	2.44245	0.949425	1.03461	4.06674	3.87409	1.70099	1.23663	NA	NA
dd_Smed_v6_10727_0_1	1156	-0.265814	1.50557	0.0690909	0.792665	0.871335	-0.259134	1.50557	0.0657746	0.797591	0.889679	0	7.81278	0.253038	2.26166	2.00822	2.86601	1.99806	3.50147	3.05408	3.76237	1.82473	3.77488	0	6.23534	0.167379	1.7391	1.37983	2.4414	1.40454	2.74059	3.94654	4.19337	2.36115	3.93875	0	5.15655	0.146422	1.39713	1.33579	2.06409	1.26698	2.24338	4.5013	4.93393	2.48851	4.69041	NA	NA
dd_Smed_v6_10729_0_1	680	-2.76885	1.66134	6.58189	0.0103021	0.0290032	-2.80665	1.66134	6.75203	0.0093641	0.0302691	0.680972	0	1.13867	2.35036	0	2.06729	0.444014	1.5609	6.20774	5.76414	8.08093	8.52718	0.799657	0	1.28045	3.07242	0	2.99372	0.530604	2.0769	13.637	10.9216	17.7761	15.1255	0.754459	0	1.12013	2.46827	0	2.53105	0.478637	1.7001	15.554	12.8504	18.735	18.012	Contig2202	-0.100043
dd_Smed_v6_1073_0_1	1424	-2.02186	5.62575	45.3081	1.68e-11	2.14e-10	-1.10135	5.62575	14.2298	0.000161788	0.000808692	24.6001	28.9126	15.9414	15.5656	43.0855	51.9641	37.7782	28.1805	82.1613	93.7939	92.4745	76.9806	13.7946	18.7322	8.5603	9.7165	24.0321	35.9345	21.5583	17.9056	86.189	84.8643	97.1396	65.2055	13.0149	15.4913	7.48851	7.80589	23.2651	30.381	19.4469	14.6571	98.3045	99.8515	102.379	77.6491	Contig5899	-0.862096
dd_Smed_v6_10730_0_1	3101	-1.58567	2.19876	8.29754	0.00396989	0.0126913	-1.27771	2.19876	5.51738	0.0188285	0.0552818	2.89413	3.29519	1.70801	2.3947	1.46052	5.07425	4.03313	2.19369	6.93806	8.20003	7.10339	8.72941	0.745246	0.980371	0.421173	0.686444	0.374092	1.61135	1.05687	0.640066	3.34219	3.40701	3.42648	3.39544	0.703124	0.810755	0.36844	0.551464	0.362152	1.36232	0.953364	0.523943	3.812	4.0087	3.61131	4.04341	NA	NA
dd_Smed_v6_10731_0_1	1406	-9.66498	0.511993	33.4376	7.36e-09	6.92e-08	-9.66498	0.511993	34.7567	3.74e-09	4.27e-08	0	0	0	0	0	0	0	0	2.42334	5.49885	3.22585	4.7186	0	0	0	0	0	0	0	0	2.57469	5.03902	3.43197	4.048	0	0	0	0	0	0	0	0	2.93661	5.92893	3.61709	4.82051	NA	NA
dd_Smed_v6_10732_0_1	1447	-8.55484	-0.391767	14.4751	0.000142024	0.00062354	-3.4936	-0.391767	4.25294	0.0391824	0.10178	0	0	0	0	0	0	0	0.632796	2.52293	1.88118	1.82473	1.11224	0	0	0	0	0	0	0	0.395682	2.60454	1.67503	1.88631	0.927136	0	0	0	0	0	0	0	0.323896	2.97066	1.97085	1.98806	1.10407	Contig669	0.204212
dd_Smed_v6_10733_0_1	1457	-0.391246	2.83191	0.877213	0.348966	0.505238	-0.116712	2.83191	0.07883	0.778889	0.877562	5.44778	4.88963	6.95854	6.6963	8.76314	9.77263	6.06819	4.42957	6.47331	7.16297	9.84048	7.98791	2.98568	3.0962	3.652	4.08536	4.77719	6.60497	3.3844	2.75076	6.63684	6.33423	10.1028	6.61283	2.81692	2.56052	3.19476	3.28203	4.62471	5.58419	3.05294	2.25171	7.56978	7.45287	10.6477	7.87479	Contig5700	-0.122531
dd_Smed_v6_10734_0_1	3067	-2.22491	3.06487	20.2428	6.82e-06	3.88e-05	-2.724	3.06487	29.1233	6.79e-08	6.46e-07	5.70314	2.39167	3.47927	3.94682	5.2944	2.11427	2.62708	0.970287	22.2084	14.7118	19.0619	16.7847	1.48485	0.719448	0.867455	1.1439	1.37112	0.678837	0.696053	0.286244	10.8168	6.18035	9.29685	6.60106	1.40093	0.594975	0.758846	0.918971	1.32735	0.573925	0.627883	0.234313	12.3373	7.27181	9.79833	7.86078	NA	NA
dd_Smed_v6_10737_0_1	3900	-3.86766	0.78341	6.50091	0.0107819	0.0301728	-3.12179	0.78341	4.5812	0.0323246	0.0865857	0	0	0.632595	0.48781	0	0	0.481015	1.39215	6.6061	3.90707	3.42136	2.56152	0	0	0.124032	0.111184	0	0	0.100225	0.322978	2.53032	1.29077	1.31226	0.792223	0	0	0.108503	0.089321	0	0	0.0904092	0.264382	2.886	1.51872	1.38304	0.943407	NA	NA
dd_Smed_v6_10738_0_1	3507	-2.73096	0.835408	10.1745	0.00142399	0.00509259	-1.3788	0.835408	2.92971	0.0869633	0.193818	0.255365	1.00982	0.506076	0.221732	1.36924	1.64443	0.555017	1.51871	2.8549	4.36531	3.42136	2.59523	0.0581445	0.265655	0.110345	0.0562014	0.31011	0.461742	0.128604	0.391823	1.21604	1.60376	1.45931	0.892592	0.054858	0.219694	0.0965293	0.0451502	0.300212	0.390381	0.116008	0.320737	1.38698	1.88699	1.53803	1.06293	NA	NA
dd_Smed_v6_10739_0_1	506	0.324709	1.45386	0.173914	0.676657	0.790094	0.643764	1.45386	0.682337	0.408783	0.597704	3.74535	4.25185	0.569335	1.90689	2.82976	5.73202	2.84909	1.68746	1.49384	3.23178	3.03035	0.606677	5.91051	7.75247	0.86038	3.34989	4.44193	11.1552	4.5755	3.0174	4.4101	8.22908	8.95831	1.44617	5.57644	6.4112	0.752657	2.69118	4.30015	9.43118	4.12738	2.46997	5.03003	9.68235	9.44153	1.72215	NA	NA
dd_Smed_v6_1074_0_1	2287	-0.26879	4.69532	0.499876	0.479555	0.629493	-0.299567	4.69532	0.621242	0.430586	0.61715	37.8365	27.4245	17.2066	14.856	18.576	31.5731	34.2631	10.8841	33.4288	34.8501	28.2181	20.7955	13.2108	11.0633	5.75309	5.7742	6.45147	13.5947	12.1743	4.30603	21.8348	19.6335	18.4563	10.9677	12.4641	9.1492	5.03278	4.63878	6.24556	11.4937	10.9819	3.52481	24.9041	23.1009	19.4519	13.0608	Contig2660	-0.08264
dd_Smed_v6_10741_0_1	1408	-0.665482	1.14579	0.33839	0.56076	0.69883	-0.565573	1.14579	0.245542	0.620232	0.772408	0.893776	5.04908	1.01215	0.0443463	1.8713	4.55743	1.07303	0	1.859	2.79766	2.73709	3.70747	0.506885	3.30843	0.549687	0.0279969	1.05563	3.1874	0.619289	0	1.9723	2.56007	2.90784	3.17606	0.478235	2.73603	0.480864	0.0224917	1.02194	2.6948	0.558637	0	2.24954	3.01219	3.06469	3.78216	NA	NA
dd_Smed_v6_10742_0_1	7457	-0.331808	2.45153	0.265926	0.606078	0.736761	-0.302476	2.45153	0.22139	0.637983	0.784695	4.38376	2.76371	3.41601	9.13535	1.27796	11.3701	5.88318	1.60308	6.90487	5.08884	6.97306	5.86454	0.469425	0.341932	0.35029	1.08897	0.136121	1.50148	0.641108	0.19451	1.3832	0.879256	1.39876	0.9486	0.442892	0.282774	0.306432	0.87484	0.131776	1.26943	0.578318	0.159222	1.57764	1.03453	1.47421	1.12963	NA	NA
dd_Smed_v6_10744_0_1	1430	3.32286	4.70666	79.1852	5.66e-19	1.48e-17	3.00139	4.70666	66.3229	3.83e-16	9.11e-15	45.54	32.633	33.7806	52.5061	38.6582	33.0296	30.2669	29.6992	6.50651	3.73825	4.49664	1.68521	25.4297	21.0539	18.0636	32.6384	21.4723	22.745	17.1995	18.7914	6.79683	3.36816	4.70367	1.42145	23.9923	17.4113	15.8019	26.2205	20.7869	19.2299	15.515	15.3822	7.75226	3.96298	4.95739	1.69272	PL05004A1H06	0.43033
dd_Smed_v6_10745_0_1	1420	0.205499	2.73045	0.214434	0.643314	0.765525	0.178141	2.73045	0.161582	0.687704	0.819605	4.17096	6.74982	5.88313	10.8205	6.618	5.96694	6.80821	7.72011	8.29912	5.13708	4.30114	6.23529	2.34547	4.38547	3.16806	6.77352	3.70178	4.13792	3.89608	4.9191	8.73048	4.6611	4.53085	5.29641	2.2129	3.62673	2.7714	5.4416	3.58362	3.49842	3.5145	4.02666	9.95772	5.48426	4.77524	6.30716	PL08001A1E12	-0.112282
dd_Smed_v6_10748_0_1	1298	-1.37035	2.42257	5.66627	0.0172942	0.0454352	-1.15216	2.42257	4.06771	0.0437105	0.110867	5.06473	1.16926	3.79557	3.28163	1.41488	5.12123	5.62417	3.33272	8.06674	5.78826	8.63486	11.9987	3.11577	0.831091	2.23602	2.24735	0.8658	3.88525	3.52101	2.32314	9.28364	5.74557	9.95096	11.15	2.93966	0.687302	1.95606	1.80544	0.838166	3.2848	3.17616	1.90167	10.5886	6.76025	10.4877	13.2778	NA	NA
dd_Smed_v6_10749_0_1	1455	-6.9393	2.58231	28.3869	9.93e-08	7.81e-07	-4.95213	2.58231	17.8226	2.42e-05	0.000142964	0.510729	0	0	0	1.04975	0.0469838	1.07303	0	13.3118	18.3295	11.7304	24.5704	0.280292	0	0	0	0.573054	0.0317983	0.599284	0	13.6668	16.2311	12.0596	20.3687	0.26445	0	0	0	0.554763	0.026884	0.540591	0	15.588	19.0975	12.7101	24.2558	NA	NA
dd_Smed_v6_1075_0_1	776	0.609916	6.9336	5.58498	0.0181151	0.047233	0.497245	6.9336	3.722	0.0536999	0.130897	126.406	145.785	142.524	153.483	162.027	117.319	107.636	138.54	86.6428	91.0686	76.1497	118.437	130.073	173.326	140.442	175.814	165.843	148.876	112.715	161.534	166.788	151.205	146.788	184.093	122.721	143.339	122.858	141.243	160.55	125.867	101.675	132.228	190.234	177.909	154.706	219.225	Contig1167	0.807334
dd_Smed_v6_10750_1_1	871	-2.31177	0.730015	2.47783	0.115461	0.219462	-3.59353	0.730015	5.36776	0.0205123	0.0594116	0.595851	2.23222	0.0632595	0.0443463	0	0	1.18404	0	3.7844	3.83472	2.34608	4.68489	0.546264	2.36446	0.0555367	0.0452579	0	0	1.10466	0	6.49043	5.67252	4.0291	6.48776	0.515388	1.95538	0.0485833	0.0363586	0	0	0.996474	0	7.40278	6.6743	4.24643	7.72586	Contig5200	-0.443015
dd_Smed_v6_10751_0_1	3565	-1.538	2.14568	3.37238	0.066298	0.140308	-0.342434	2.14568	0.176267	0.674601	0.810057	1.57475	0.0531482	6.32595	0.48781	7.02877	5.87298	3.0711	3.29054	7.60199	4.43767	5.44159	6.94308	0.352724	0.0137544	1.35687	0.121632	1.566	1.62225	0.70003	0.835138	3.18539	1.60382	2.28324	2.34912	0.332787	0.0113747	1.18699	0.0977144	1.51602	1.37154	0.63147	0.683624	3.63316	1.88706	2.40639	2.79742	PL06017B1C08	0.108625
dd_Smed_v6_10752_0_1	1844	-1.12135	2.99016	6.37402	0.0115803	0.0320521	-0.795154	2.99016	3.26782	0.0706516	0.163509	5.83083	4.14556	6.89528	4.43463	6.93749	2.72506	5.88318	11.1372	12.5815	10.0571	12.4798	11.2235	2.52495	2.07412	2.85933	2.13773	2.98822	1.45524	2.59259	5.4647	10.1921	7.02703	10.1235	7.34145	2.38223	1.71527	2.50133	1.71737	2.89285	1.23034	2.33868	4.47327	11.6248	8.26802	10.6696	8.74246	NA	NA
dd_Smed_v6_10753_0_1	503	-0.919362	2.54489	1.48672	0.222726	0.364078	0.0519938	2.54489	0.00486542	0.944391	0.972524	6.04363	0	6.00965	2.17297	5.43132	6.24885	7.69624	8.52165	5.17865	6.70473	7.918	7.1116	9.5943	0	9.13595	3.84009	8.57649	12.2335	12.4335	15.3287	15.3795	17.1741	23.5468	17.0535	9.05201	0	7.99209	3.08499	8.30275	10.3429	11.2158	12.5477	17.5414	20.2071	24.8169	20.3079	NA	NA
dd_Smed_v6_10754_0_1	589	-1.99861	2.03966	8.45551	0.0036394	0.0117376	-2.08135	2.03966	9.1526	0.00248365	0.00952887	0.595851	4.99593	1.51823	1.01997	1.73437	2.16126	1.44304	2.32025	12.4487	9.52651	5.89777	4.58378	0.807803	7.82552	1.97103	1.53931	2.33883	3.61335	1.99089	3.56427	31.572	20.8391	14.9781	9.38689	0.762144	6.47161	1.72425	1.23663	2.26418	3.05492	1.7959	2.91763	36.0101	24.5193	15.786	11.1783	NA	NA
dd_Smed_v6_10756_0_1	373	-9.00117	-0.0960564	24.9059	6.02e-07	4.2e-06	-9.00117	-0.0960564	25.9392	3.52e-07	2.98e-06	0	0	0	0	0	0	0	0	2.72211	3.2559	1.40113	2.62893	0	0	0	0	0	0	0	0	10.9016	11.2466	5.61893	8.50127	0	0	0	0	0	0	0	0	12.4341	13.2328	5.92202	10.1236	NA	NA
dd_Smed_v6_10758_0_1	1482	4.17771	3.19896	43.6395	3.95e-11	4.86e-10	4.47079	3.19896	48.7575	2.9e-12	4.81e-11	11.4914	10.2576	5.12402	21.0645	8.76314	26.9687	12.9874	10.0825	0.431554	0.723532	1.30338	0.168521	6.19168	6.38572	2.64384	12.6345	4.6966	17.9197	7.12126	6.15563	0.434992	0.629028	1.31554	0.137158	5.84171	5.28091	2.31282	10.1501	4.5467	15.1503	6.42381	5.03886	0.496139	0.740116	1.38651	0.163332	PL06013A1B06	0.775963
dd_Smed_v6_10759_0_1	1961	-0.134381	2.35854	0.0292445	0.864216	0.916546	0.001273	2.35854	2.63e-06	0.998705	0.99939	1.70243	0.0531482	9.55218	7.67192	4.38157	6.24885	4.25513	5.94828	4.18276	3.61766	6.64721	6.37011	0.693227	0.0250048	3.72475	3.47761	1.7747	3.13791	1.76327	2.74451	3.18625	2.3769	5.07045	3.91816	0.654044	0.0206786	3.2584	2.79379	1.71805	2.65296	1.59058	2.24659	3.63414	2.79666	5.34395	4.66589	PL04016A2H06	0.348571
dd_Smed_v6_1076_0_1	430	-2.86441	4.63478	45.5982	1.45e-11	1.86e-10	-2.46093	4.63478	34.9269	3.42e-09	3.93e-08	4.85193	15.6787	3.54253	6.82934	7.30262	12.8736	12.7284	7.97322	57.5295	62.3926	66.7328	38.524	9.01009	33.6399	6.29967	14.1177	13.4891	29.4815	24.054	16.7771	199.856	186.95	232.143	108.063	8.50082	27.8198	5.51093	11.3417	13.0585	24.9252	21.6982	13.7333	227.949	219.965	244.665	128.685	Contig6788	-2.6173
dd_Smed_v6_10760_0_1	1907	-2.46338	1.24122	4.80876	0.0283154	0.069111	-0.294939	1.24122	0.0777642	0.78035	0.878229	1.70243	0	0.759114	0	0.912827	5.59107	1.33204	3.33272	4.97947	3.01472	2.60675	3.10079	0.712856	0	0.304389	0	0.380198	2.88711	0.56761	1.58125	3.90056	2.03684	2.04472	1.96126	0.672564	0	0.266278	0	0.368063	2.44092	0.512019	1.29437	4.44886	2.39655	2.15501	2.33554	NA	NA
dd_Smed_v6_10761_0_1	794	0.915555	1.0747	1.38043	0.240028	0.385814	1.51395	1.0747	3.71232	0.0540124	0.131463	3.1495	2.92315	1.26519	0.665195	1.73437	2.77204	3.0711	4.55613	1.19507	0.940592	1.59663	0.505564	3.16741	3.39659	1.21845	0.744704	1.73498	3.43794	3.14308	5.1919	2.24837	1.5263	3.00794	0.768014	2.98838	2.80894	1.0659	0.598269	1.6796	2.90662	2.83525	4.24997	2.56443	1.79585	3.17019	0.914578	Contig3114	0.0175151
dd_Smed_v6_10762_0_1	1607	-5.65059	1.61563	14.9471	0.000110565	0.000495864	-3.3374	1.61563	6.60006	0.0101975	0.0326559	0.595851	0	0	0	0.456414	0	0.185006	2.489	4.08317	7.98297	10.2315	9.53831	0.296077	0	0	0	0.225587	0	0.0935518	1.40139	3.79556	6.40043	9.52374	7.15927	0.279342	0	0	0	0.218387	0	0.0843894	1.14715	4.3291	7.53076	10.0375	8.52552	NA	NA
dd_Smed_v6_10764_0_1	2330	-2.65604	2.69561	13.2824	0.000267906	0.00110841	-0.583198	2.69561	0.73033	0.392776	0.582995	1.1917	0	2.53038	2.92686	6.89185	3.80569	6.14219	11.1794	12.0171	11.8418	6.90789	11.2235	0.408409	0	0.830429	1.11661	2.34937	1.60841	2.14215	4.34123	7.70441	6.54821	4.4348	5.81014	0.385325	0	0.726456	0.897044	2.27438	1.35983	1.93235	3.55363	8.78741	7.70463	4.67401	6.91892	NA	NA
dd_Smed_v6_10765_0_1	1867	-6.21456	2.36693	31.9375	1.59e-08	1.41e-07	-4.21787	2.36693	18.3007	1.89e-05	0.000113665	0	0	0.0632595	0.665195	0.821545	0.0469838	0.481015	1.68746	13.1126	12.3965	10.9809	20.4248	0	0	0.0259092	0.316709	0.349509	0.0247812	0.209362	0.817784	10.4915	8.55491	8.79791	13.1955	0	0	0.0226653	0.254432	0.338354	0.0209514	0.188857	0.669419	11.9663	10.0657	9.27247	15.7137	NA	NA
dd_Smed_v6_10766_0_1	1860	-0.478294	1.11242	0.178114	0.672999	0.787083	-1.29711	1.11242	1.27029	0.259712	0.4418	2.46853	3.13574	1.13867	1.68516	0	3.00696	0	1.77183	1.82581	2.77354	4.62698	2.52782	1.05976	1.55539	0.468121	0.805348	0	1.59197	0	0.861905	1.46635	1.92124	3.72108	1.63926	0.999861	1.28629	0.40951	0.646988	0	1.34593	0	0.705535	1.67247	2.26054	3.9218	1.95208	NA	NA
dd_Smed_v6_10768_0_1	864	0.654921	3.03563	1.57371	0.20967	0.347947	-0.0306569	3.03563	0.00346597	0.953054	0.977087	11.4488	21.3656	5.25054	5.14418	2.87541	9.8666	7.32623	6.79201	6.04176	9.55063	7.82025	4.01081	10.5811	22.8146	4.64689	5.29246	2.64337	11.2453	6.89048	7.11271	10.4459	14.2422	13.5391	5.59927	9.98305	18.8674	4.06508	4.25177	2.559	9.50741	6.21563	5.8223	11.9142	16.7574	14.2695	6.66781	Contig2220	-0.0661646
dd_Smed_v6_1077_0_1	687	0.334251	6.44086	1.06456	0.302178	0.454687	0.384849	6.44086	1.41083	0.234919	0.411148	104.402	98.4836	67.1816	98.0941	88.453	134.937	100.939	57.036	69.2146	83.6645	99.1868	39.9733	121.348	132.257	74.7766	126.923	102.265	193.417	119.395	75.1178	150.5	156.908	215.964	70.1821	114.489	109.375	65.4143	101.966	99.0011	163.525	107.701	61.4897	171.655	184.618	227.613	83.5753	Contig1355	-0.984235
dd_Smed_v6_10771_0_1	1121	0.193616	2.30317	0.119952	0.729087	0.827763	-0.401861	2.30317	0.513491	0.473632	0.654807	6.55436	2.55111	6.95854	6.91803	5.20312	5.07425	3.58911	1.34996	6.04176	3.06295	5.40901	5.59491	4.66883	2.0996	4.74663	5.4857	3.68663	4.45744	2.60174	1.0896	8.05105	3.52042	7.21766	6.02006	4.40494	1.73634	4.15233	4.40701	3.56896	3.76856	2.34693	0.891922	9.18278	4.14214	7.60698	7.1689	PL030002A10A01	-0.180587
dd_Smed_v6_10774_0_1	1412	0.0108826	0.778179	9.85e-05	0.992081	0.996571	-0.0688193	0.778179	0.00394187	0.949938	0.975887	0.255365	0	1.89778	4.52333	1.00411	0.704757	1.73905	2.86867	2.15777	1.32648	0.586519	2.56152	0.144414	0	1.02774	2.8476	0.564831	0.4915	1.00083	1.83822	2.28279	1.21039	0.621343	2.18815	0.136251	0	0.899066	2.28766	0.546803	0.41554	0.902812	1.50472	2.60368	1.42415	0.654859	2.60573	NA	NA
dd_Smed_v6_10776_0_1	1354	-9.41847	0.284284	29.8008	4.79e-08	3.95e-07	-9.41847	0.284284	30.9962	2.59e-08	2.63e-07	0	0	0	0	0	0	0	0	3.45243	4.8959	1.95506	3.06709	0	0	0	0	0	0	0	0	3.80891	4.6588	2.15986	2.73225	0	0	0	0	0	0	0	0	4.34433	5.48156	2.27637	3.25367	NA	NA
dd_Smed_v6_10777_0_1	3529	-6.45108	2.94007	22.9749	1.64e-06	1.06e-05	-4.09994	2.94007	11.7612	0.000604784	0.00268393	0.808655	0	0.126519	0	4.33593	0	0.481015	0.126559	16.3659	24.8172	21.3102	22.4808	0.182976	0	0.0274143	0	0.975894	0	0.110762	0.0324484	6.92758	9.06068	9.03275	7.68374	0.172634	0	0.0239819	0	0.944745	0	0.0999139	0.0265615	7.90139	10.6608	9.51998	9.15007	NA	NA
dd_Smed_v6_1078_1_1	749	0.0705297	7.36758	0.0723481	0.787948	0.868402	0.154213	7.36758	0.345937	0.556422	0.723966	146.962	144.35	209.073	157.296	163.579	143.395	204.69	185.198	138.164	132.262	171.003	184.834	156.678	177.807	213.446	186.678	173.467	188.525	222.074	223.72	275.554	227.516	341.512	297.655	147.822	147.044	186.722	149.97	167.93	159.389	200.325	183.132	314.289	267.696	359.933	354.459	PL04007B1H08	-0.355544
dd_Smed_v6_10780_0_1	872	-2.37428	0.396477	2.76862	0.0961291	0.189006	-2.45417	0.396477	2.93923	0.0864517	0.193126	1.27682	0	0.316297	0.443463	1.04975	0.892692	0	0	0.630733	3.54531	2.63933	3.87599	1.16922	0	0.277365	0.45206	0.956185	1.0081	0	0	1.0805	5.23839	4.52754	5.36142	1.10314	0	0.242638	0.363169	0.925666	0.852303	0	0	1.23238	6.1635	4.77176	6.38457	NA	NA
dd_Smed_v6_10781_0_1	1260	0.481185	2.67837	1.35538	0.24434	0.390802	0.751204	2.67837	3.30828	0.0689314	0.160355	5.10729	6.27148	7.3381	7.2728	5.65953	8.78597	9.36129	7.50917	5.17865	4.14825	4.52923	4.7523	3.23671	4.59211	4.45334	5.13081	3.56765	6.86654	6.03737	5.39228	6.13961	4.24184	5.37698	4.54932	3.05376	3.79762	3.89576	4.12191	3.45377	5.80534	5.44608	4.41399	7.00265	4.99096	5.66701	5.4175	NA	NA
dd_Smed_v6_10782_0_1	818	-0.120972	2.86083	0.0606054	0.805542	0.878437	-0.244132	2.86083	0.247073	0.619144	0.771785	2.76645	12.0646	6.51572	7.36149	3.33182	5.54409	6.73421	10.7153	9.56058	7.93474	6.38654	7.31383	2.70055	13.6073	6.09091	7.99959	3.23519	6.67415	6.68984	11.8523	17.4593	12.498	11.6788	10.7846	2.54791	11.2531	5.3283	6.42659	3.13193	5.64268	6.03465	9.70203	19.9135	14.7051	12.3087	12.8427	NA	NA
dd_Smed_v6_10783_0_1	1582	0.816575	3.19475	3.54616	0.0596832	0.128431	0.379347	3.19475	0.771238	0.379834	0.570596	6.89485	10.2045	8.98284	21.1532	11.1365	6.85964	8.51026	8.39509	10.1581	4.72708	5.11575	6.84197	3.48018	5.95107	4.3419	11.8857	5.59131	4.26986	4.37139	4.80142	9.59183	3.84987	4.83712	5.2166	3.28347	4.92147	3.79828	9.54855	5.41285	3.60997	3.94326	3.93033	10.9401	4.52977	5.09804	6.21212	NA	NA
dd_Smed_v6_10784_0_1	773	-0.437641	0.910378	0.175426	0.675334	0.788947	0.344017	0.910378	0.109508	0.740705	0.854324	0.595851	3.82667	0.885633	0	1.18668	0.98666	1.92406	5.02018	1.69302	1.37471	2.83484	1.28076	0.615519	4.56724	0.876086	0	1.21934	1.25692	2.02265	5.87612	3.27173	2.29135	5.48572	1.99849	0.580728	3.77705	0.766397	0	1.18042	1.06267	1.82456	4.81005	3.73163	2.69601	5.78162	2.37988	NA	NA
dd_Smed_v6_10785_0_1	5115	-1.14296	2.74575	3.65386	0.0559394	0.12178	-1.73382	2.74575	8.13609	0.00433927	0.0156123	4.3412	11.3206	1.51823	3.32598	4.97491	1.40951	2.29407	4.93581	14.6064	10.7083	6.15845	13.8525	0.677715	2.0419	0.226968	0.578001	0.772523	0.271358	0.364455	0.873099	4.26573	2.69733	1.80098	3.26659	0.639409	1.68863	0.19855	0.464345	0.747866	0.229421	0.328761	0.714698	4.86536	3.17368	1.89813	3.88997	NA	NA
dd_Smed_v6_10786_0_1	2347	-0.11675	0.657433	0.0153087	0.90153	0.940777	0.591557	0.657433	0.394366	0.530013	0.704011	2.46853	0.265741	1.51823	0.576502	4.19901	0.939676	1.88706	0.885914	0.464751	1.83295	0.716856	2.22448	0.839862	0.104462	0.494648	0.218345	1.42104	0.394261	0.653364	0.34153	0.295802	1.00623	0.456881	1.14322	0.792391	0.0863886	0.432716	0.175411	1.37568	0.333329	0.589374	0.279569	0.337383	1.18393	0.481526	1.36139	NA	NA
dd_Smed_v6_10787_0_1	3375	-1.3643	1.9495	2.63513	0.104523	0.202122	-1.15674	1.9495	1.91973	0.165886	0.31645	3.02182	4.09241	2.46712	0	4.15336	3.24188	2.44208	1.2234	5.17865	7.79003	7.68991	4.01081	0.714953	1.11871	0.558971	0	0.977458	0.945894	0.587987	0.32798	2.29212	2.97389	3.40825	1.43341	0.674542	0.92516	0.488985	0	0.94626	0.799709	0.530401	0.268477	2.61432	3.49909	3.5921	1.70696	NA	NA
dd_Smed_v6_1079_0_1	944	2.10158	6.10495	32.2425	1.36e-08	1.22e-07	1.99546	6.10495	29.2825	6.26e-08	5.99e-07	92.4846	97.8458	64.2716	127.008	64.3543	126.715	101.679	61.8452	22.2084	24.3348	32.617	9.74054	78.2313	95.6274	52.0619	119.595	54.1474	132.183	87.5271	59.2768	35.1432	33.2136	51.684	12.4458	73.8095	79.0827	45.5435	96.0786	52.4191	111.755	78.9548	48.5226	40.0832	39.0792	54.4718	14.821	Contig1068	2.08828
dd_Smed_v6_10790_0_1	907	-1.94021	0.33808	2.48349	0.115047	0.218832	-0.0394318	0.33808	0.00111696	0.973339	0.986057	1.44707	0	0.126519	0.0443463	0.182565	1.1746	2.47908	2.32025	1.69302	1.54354	2.0854	1.01113	1.27399	0	0.106665	0.0434616	0.159876	1.27526	2.22109	2.31461	2.78836	2.19265	3.43927	1.34466	1.20198	0	0.0933099	0.0349155	0.154773	1.07818	2.00356	1.89469	3.18032	2.57988	3.62479	1.60127	NA	NA
dd_Smed_v6_10792_0_1	1257	1.03272	2.27703	3.24309	0.0717254	0.149446	0.984478	2.27703	2.95453	0.0856374	0.191641	4.46888	3.82667	2.53038	12.4613	5.43132	6.76567	5.18016	5.18892	2.45654	1.97766	4.20338	2.76375	2.83888	2.80865	1.5393	8.81219	3.43196	5.30022	3.34881	3.73502	2.91933	2.0271	5.00205	2.65202	2.67842	2.32272	1.34657	7.0794	3.32242	4.48109	3.02083	3.0574	3.3297	2.38509	5.27187	3.15812	Contig2215	0.306892
dd_Smed_v6_10793_0_1	534	-8.26979	-0.737629	18.6928	1.54e-05	8.15e-05	-8.26979	-0.737629	19.5252	9.93e-06	6.37e-05	0	0	0	0	0	0	0	0	1.52704	1.56765	1.14045	1.78633	0	0	0	0	0	0	0	0	4.27172	3.78241	3.19463	4.0349	0	0	0	0	0	0	0	0	4.8722	4.4504	3.36695	4.80491	NA	NA
dd_Smed_v6_10794_0_1	1858	-3.06126	1.37734	5.22684	0.022241	0.0561625	-3.66765	1.37734	7.08451	0.00777529	0.0258835	0.978898	0	0.442816	1.55212	0	1.87935	0	0.0843728	4.18276	7.52474	6.77755	6.57233	0.420702	0	0.182243	0.742566	0	0.99605	0	0.0410873	3.36288	5.21802	5.45647	4.26665	0.396923	0	0.159425	0.596551	0	0.842114	0	0.0336331	3.8356	6.13953	5.75079	5.08088	NA	NA
dd_Smed_v6_10796_0_1	2037	0.675487	0.326137	0.397309	0.528482	0.672754	0.313934	0.326137	0.0863461	0.768875	0.871899	1.31938	3.77352	0.759114	0.0443463	2.60156	0.610789	0.740023	0.632796	1.19507	1.35059	0.391013	0.741494	0.517206	1.7091	0.284963	0.0193518	1.01441	0.29527	0.295214	0.281076	0.876391	0.854267	0.287134	0.439066	0.487972	1.41341	0.249284	0.0155466	0.982034	0.249637	0.266301	0.230082	0.999585	1.00513	0.302622	0.522856	NA	NA
dd_Smed_v6_10797_0_1	716	-0.797424	1.76975	1.03844	0.308184	0.462135	-0.934987	1.76975	1.42244	0.233002	0.408859	4.554	0.0531482	3.66905	2.66078	3.28618	2.49014	1.51705	2.65774	5.84258	3.01472	4.82249	5.35898	5.07883	0.0684837	3.91844	3.30332	3.64544	3.42476	1.72174	3.35854	12.1895	5.42493	10.0749	9.02781	4.79176	0.0566352	3.42784	2.65377	3.52909	2.89547	1.55312	2.74922	13.903	6.38298	10.6184	10.7506	NA	NA
dd_Smed_v6_10798_0_1	876	-0.166916	1.54837	0.0452552	0.831535	0.894504	-0.0981365	1.54837	0.0156987	0.90029	0.948443	3.57511	5.26167	1.70801	0.221732	1.91694	1.97332	2.29407	5.10455	2.62252	4.05178	3.48653	1.92114	3.25888	5.54155	1.49093	0.224998	1.7381	2.21826	2.12807	5.27235	4.47208	5.95939	5.95352	2.64526	3.07468	4.5828	1.30426	0.180755	1.68263	1.87543	1.91965	4.31582	5.10072	7.01183	6.27465	3.15008	NA	NA
dd_Smed_v6_108_0_1	905	-0.113975	9.74502	0.183459	0.668418	0.783336	-0.112935	9.74502	0.180141	0.671252	0.807589	840.831	789.144	926.435	783.422	851.394	791.489	841.85	857.48	905.832	884.567	1040.78	783.186	741.896	804.489	782.779	769.489	747.229	861.222	755.908	857.287	1495.18	1259.34	1720.26	1043.83	699.963	665.302	684.772	618.18	723.379	728.123	681.875	701.755	1705.36	1481.74	1813.05	1243.03	Contig1189	-0.841262
dd_Smed_v6_10802_0_1	4577	-0.277206	3.2218	0.64953	0.420281	0.577068	-0.219518	3.2218	0.409396	0.522276	0.697406	9.02289	7.97223	7.84417	9.26839	9.4934	8.36312	8.51026	9.15444	9.46099	9.98475	13.5225	8.39236	1.57416	1.60698	1.31051	1.80002	1.64745	1.79931	1.51093	1.80968	3.08781	2.81071	4.41938	2.21165	1.48518	1.32895	1.14643	1.44608	1.59487	1.52123	1.36295	1.48136	3.52186	3.30709	4.65776	2.63371	NA	NA
dd_Smed_v6_10803_0_1	849	1.14178	2.54532	1.93775	0.163913	0.287855	1.07229	2.54532	1.71529	0.190301	0.350503	3.61767	0.0531482	10.6276	14.4569	2.82976	5.68504	10.3973	8.47946	1.9254	2.50825	5.05058	3.53895	3.40255	0.0577554	9.57194	15.1364	2.64737	6.59394	9.95168	9.03673	3.38772	3.80647	8.89852	5.02782	3.21023	0.047763	8.37349	12.1601	2.56287	5.57487	8.97703	7.39726	3.86392	4.4787	9.37851	5.98731	PL03018B2D07	-0.0904773
dd_Smed_v6_10804_0_1	3816	0.200998	1.97092	0.0952464	0.757611	0.847337	0.245798	1.97092	0.142887	0.705428	0.831076	3.61767	6.16519	5.56683	0.576502	5.24876	4.51045	2.84909	3.79677	3.85079	4.29296	3.51911	2.15707	0.757013	1.49056	1.11551	0.134291	1.0925	1.16394	0.606709	0.900238	1.50743	1.44947	1.37946	0.68182	0.714225	1.23268	0.975841	0.107885	1.05763	0.984056	0.547289	0.736913	1.71932	1.70545	1.45387	0.811936	NA	NA
dd_Smed_v6_10805_0_1	1537	-0.802327	1.83506	0.9584	0.32759	0.483998	-0.621814	1.83506	0.580119	0.446266	0.630271	3.48998	0	3.60579	3.68075	4.60978	3.57077	1.51705	2.53118	4.87988	5.01649	4.30114	4.61749	1.81315	0	1.7939	2.12871	2.3822	2.28774	0.802062	1.49005	4.74275	4.2052	4.18595	3.62364	1.71066	0	1.5693	1.71013	2.30616	1.93418	0.723509	1.21972	5.40943	4.94784	4.41174	4.31516	NA	NA
dd_Smed_v6_10806_0_1	1722	-5.01683	0.200069	14.7016	0.000125941	0.00055815	-0.833611	0.200069	0.627369	0.428322	0.615046	0	0	0.253038	0	1.00411	1.55047	1.44304	0.46405	2.09138	2.96648	1.79214	1.11224	0	0	0.112363	0	0.463148	0.886641	0.680972	0.243827	1.81424	2.21957	1.55677	0.779075	0	0	0.0982951	0	0.448366	0.749614	0.614279	0.199591	2.06926	2.61155	1.64074	0.92775	Contig3400	-0.0903657
dd_Smed_v6_10808_0_1	2749	-0.375516	3.6523	1.37082	0.241671	0.387786	-0.491609	3.6523	2.34974	0.125304	0.25551	11.7042	14.4032	11.0071	9.44577	13.1904	10.1955	11.5074	8.0576	13.0794	13.5783	15.4124	18.3351	3.39978	4.83387	3.06177	3.05434	3.81113	3.65218	3.4016	2.65205	7.10736	6.36401	8.38649	8.04493	3.20762	3.99755	2.67842	2.45375	3.68949	3.08775	3.06845	2.17091	8.10643	7.4879	8.83886	9.5802	Contig4459	-0.115151
dd_Smed_v6_1081_0_1	1675	1.20365	2.8225	7.06706	0.0078514	0.0228784	1.01586	2.8225	5.07193	0.0243163	0.0684273	8.8952	10.1513	7.52788	9.75619	14.3314	4.79235	6.88221	5.90609	3.91718	2.87001	4.07305	4.92082	4.24057	5.59138	3.43661	5.17751	6.79588	2.81743	3.33884	3.19034	3.49344	2.20764	3.63738	3.54353	4.00088	4.624	3.00633	4.15943	6.57897	2.382	3.01184	2.61153	3.98451	2.59752	3.83359	4.21976	Contig5564	-0.311764
dd_Smed_v6_10811_0_1	1416	0.0904624	2.27961	0.0140962	0.905491	0.943112	-0.198965	2.27961	0.0681264	0.794084	0.887594	2.63877	9.61982	2.27734	6.25283	3.24054	8.45708	5.10616	0.210932	8.4651	4.58237	2.63933	3.84229	1.48806	6.26781	1.22981	3.92526	1.81771	5.88134	2.93031	0.134781	8.93025	4.16953	2.78815	3.27295	1.40395	5.1834	1.07583	3.15342	1.7597	4.9724	2.64332	0.110329	10.1856	4.90588	2.93854	3.89755	PL020002001B04	-0.00711426
dd_Smed_v6_10812_0_1	904	-5.34991	1.76632	15.0489	0.000104762	0.000472418	-3.53071	1.76632	7.90635	0.00492616	0.0174045	0.55329	0	0.253038	0.0443463	0	2.49014	0	0.590609	8.4983	6.97003	10.4922	9.74054	0.488729	0	0.214037	0.0436058	0	2.71253	0	0.59113	14.0429	9.93405	17.3613	12.9965	0.461105	0	0.187239	0.0350314	0	2.29332	0	0.483885	16.0169	11.6884	18.2977	15.4767	Contig3493	-0.158294
dd_Smed_v6_10813_0_1	3487	-3.82889	2.03007	16.1333	5.9e-05	0.000278854	-2.75095	2.03007	9.25231	0.00235198	0.00906562	2.12804	0	0.506076	0.0886927	0.775903	2.58411	0.777024	1.68746	10.3573	11.9142	7.36407	9.63942	0.487316	0	0.110978	0.0226095	0.176737	0.729756	0.181078	0.437856	4.437	4.40222	3.159	3.33436	0.459772	0	0.097083	0.0181637	0.171096	0.616975	0.163343	0.358418	5.0607	5.17966	3.3294	3.97067	NA	NA
dd_Smed_v6_10815_0_1	1749	0.178604	1.42807	0.053429	0.8172	0.88534	0.792048	1.42807	1.04709	0.306178	0.495006	3.53254	1.38185	2.72016	1.55212	8.67186	1.55047	2.92309	0.9281	1.36106	1.7606	1.69439	3.30302	1.6128	0.728927	1.18926	0.788844	3.93817	0.872954	1.35811	0.480127	1.16247	1.29697	1.44913	2.2779	1.52164	0.602814	1.04036	0.633729	3.81247	0.738042	1.2251	0.39302	1.32587	1.52602	1.5273	2.7126	NA	NA
dd_Smed_v6_10816_0_1	1625	-0.805136	2.65445	3.13355	0.0766966	0.157444	-0.367516	2.65445	0.666229	0.414369	0.602719	5.14985	3.56093	6.51572	2.9712	4.15336	7.18852	7.40023	5.86391	11.0212	6.41532	7.62474	6.70715	2.53061	2.02172	3.06607	1.6253	2.03011	4.35617	3.70062	3.26501	10.1314	5.08657	7.01869	4.97849	2.38757	1.67194	2.68219	1.30571	1.96531	3.68294	3.33819	2.67266	11.5556	5.98487	7.39729	5.92857	NA	NA
dd_Smed_v6_10817_0_1	927	0.314399	1.70993	0.201553	0.653471	0.772775	-0.627159	1.70993	0.79272	0.373279	0.563738	2.08548	4.4113	3.16297	6.82934	0.775903	2.20824	4.44014	1.13903	3.718	3.30413	4.82249	1.41558	1.79643	4.39035	2.60909	6.54868	0.664813	2.34577	3.89224	1.11175	5.99135	4.59238	7.78172	1.84191	1.69489	3.63076	2.28242	5.26098	0.643594	1.98324	3.51104	0.910052	6.83355	5.4034	8.20147	2.19341	NA	NA
dd_Smed_v6_10819_0_1	374	-4.76621	0.865121	8.36338	0.00382857	0.0122814	-3.9792	0.865121	6.3883	0.0114875	0.0360773	0	0	0.695854	0	0.730262	0	0.444014	0	7.00446	2.60472	4.36631	4.85342	0	0	1.42272	0	1.55088	0	0.964734	0	27.9768	8.97323	17.4633	15.6527	0	0	1.24459	0	1.50138	0	0.870249	0	31.9094	10.5579	18.4053	18.6398	NA	NA
dd_Smed_v6_10820_0_1	1175	-9.90089	0.735114	38.3589	5.89e-10	6.22e-09	-8.21007	0.735114	34.408	4.47e-09	5.05e-08	0	0	0	0	0	0.0469838	0	0	5.27824	5.13708	5.34384	2.93227	0	0	0	0	0	0.0393758	0	0	6.71036	5.63299	6.80299	3.01009	0	0	0	0	0	0.0332904	0	0	7.65363	6.62778	7.16995	3.58452	NA	NA
dd_Smed_v6_10822_0_1	1537	-10.4517	1.30241	37.6141	8.62e-10	8.95e-09	-4.79966	1.30241	16.2773	5.47e-05	0.000301747	0	0	0	0	0.31949	0.657773	0	0	7.33642	7.33179	5.40901	7.31383	0	0	0	0	0.165103	0.421426	0	0	7.13025	6.14606	5.26415	5.73963	0	0	0	0	0.159833	0.356296	0	0	8.13255	7.23146	5.5481	6.83496	Contig7662	-0.344198
dd_Smed_v6_10823_0_1	4010	-4.9376	1.33153	11.1976	0.000819035	0.00306607	-3.2039	1.33153	5.65033	0.0174521	0.0517495	0.255365	0	0.569335	0	1.78001	0	0.96203	0	5.47742	7.59709	5.18092	7.17901	0.050851	0	0.108567	0	0.352574	0	0.194952	0	2.04045	2.44097	1.93262	2.1594	0.0479768	0	0.0949736	0	0.341321	0	0.175858	0	2.32728	2.87205	2.03687	2.57149	NA	NA
dd_Smed_v6_10825_0_1	709	-3.99201	2.57534	18.4738	1.72e-05	9.05e-05	-2.47097	2.57534	8.20722	0.00417241	0.0150739	0.808655	0.0531482	2.72016	0	4.47285	1.40951	1.73905	2.57337	16.4986	11.2871	14.9236	13.8862	0.910752	0.0691599	2.93373	0	5.01084	1.95768	1.99319	3.28403	34.7614	20.5115	31.4857	23.6238	0.859274	0.0571944	2.56642	0	4.8509	1.65513	1.79798	2.68823	39.6477	24.1338	33.184	28.132	Contig1732	-0.280059
dd_Smed_v6_10826_0_1	1848	-1.24791	0.956508	1.57316	0.209748	0.347973	-1.71991	0.956508	2.91704	0.0876483	0.195177	1.48963	1.5413	2.27734	0.133039	1.3236	0	1.48005	1.09685	3.7844	3.56943	2.96518	2.59523	0.643663	0.769479	0.942321	0.063993	0.568888	0	0.650813	0.537025	3.05907	2.48861	2.40012	1.6939	0.607282	0.63635	0.824338	0.0514097	0.55073	0	0.587073	0.439596	3.48908	2.9281	2.52959	2.01715	Contig6910	-0.891573
dd_Smed_v6_10827_0_1	2249	-0.0125615	1.70871	0.000452418	0.98303	0.990697	0.617579	1.70871	1.09927	0.294426	0.481825	2.29828	2.39167	3.92209	2.17297	2.73848	4.08759	3.84812	5.99047	3.02088	3.37648	2.86743	1.5841	0.816013	0.981123	1.33352	0.858854	0.967147	1.78977	1.39041	2.41003	2.0065	1.93435	1.90716	0.849585	0.76989	0.811377	1.16656	0.689973	0.936278	1.51317	1.25423	1.97279	2.28855	2.27596	2.01003	1.01172	Contig6862	-0.287793
dd_Smed_v6_10828_0_1	4306	-0.641964	1.90648	0.582583	0.445302	0.599256	-0.397223	1.90648	0.224863	0.635359	0.783192	3.70279	0	3.73231	4.3016	1.68873	2.25522	3.2191	6.74982	3.58522	5.76414	3.42136	5.56121	0.686654	0	0.66279	0.887995	0.3115	0.515744	0.607496	1.4183	1.24376	1.72473	1.18853	1.55779	0.647843	0	0.579806	0.713384	0.301558	0.436038	0.547998	1.16099	1.41859	2.02932	1.25264	1.85507	NA	NA
dd_Smed_v6_10829_0_1	1489	1.74814	3.29499	16.9704	3.8e-05	0.000186445	1.21974	3.29499	8.46571	0.00361904	0.0132978	10.3848	17.2732	12.0193	19.0689	8.07852	6.6717	8.54727	17.423	4.94627	4.67884	5.11575	2.73005	5.56914	10.7026	6.17244	11.3838	4.30932	4.41226	4.66461	10.5871	4.96224	4.04859	5.13924	2.21151	5.25436	8.85092	5.39963	9.14533	4.17178	3.73036	4.20776	8.66638	5.65978	4.76358	5.41645	2.63354	NA	NA
dd_Smed_v6_10829_1_1	705	1.32676	0.42886	1.65457	0.198338	0.332869	0.776039	0.42886	0.576583	0.447655	0.631689	1.02146	4.305	1.20193	0.84258	0.182565	3.10093	1.11003	0.632796	1.06229	0.651179	1.0427	0.168521	1.15695	5.63373	1.30366	1.06237	0.205684	4.33134	1.27947	0.812129	2.25085	1.19007	2.21235	0.288323	1.09156	4.65903	1.14043	0.853473	0.199119	3.66194	1.15416	0.66479	2.56726	1.40024	2.33169	0.343345	NA	NA
dd_Smed_v6_1083_0_1	394	-2.19948	6.317	61.5943	4.22e-15	7.8e-14	-1.24435	6.317	20.975	4.65e-06	3.18e-05	25.4939	45.176	25.114	31.0868	60.3835	48.2524	66.1581	71.1684	153.733	132.045	144.381	152.647	51.6682	105.785	48.7408	70.135	121.729	120.598	136.449	163.434	582.861	431.802	548.15	467.309	48.7478	87.4828	42.6382	56.344	117.844	101.96	123.085	133.783	664.794	508.059	577.717	556.489	NA	NA
dd_Smed_v6_10831_0_1	3451	-5.48818	1.10208	11.601	0.000659146	0.00251629	-3.87267	1.10208	6.83813	0.00892322	0.0291436	0.468169	0	0	0	0.365131	0	1.14704	0	5.6766	7.7418	3.22585	5.89825	0.108328	0	0	0	0.084038	0	0.270094	0	2.45718	2.89039	1.39825	2.06154	0.102205	0	0	0	0.0813557	0	0.243641	0	2.80259	3.40084	1.47367	2.45495	NA	NA
dd_Smed_v6_10833_0_1	5180	-5.63602	1.40978	15.7081	7.39e-05	0.00034241	-4.0483	1.40978	9.68012	0.00186273	0.00739015	0.127682	0	0.442816	0	0	0.98666	0	0.717168	8.03355	8.17592	6.35395	5.83084	0.0196827	0	0.0653682	0	0	0.187567	0	0.125269	2.31671	2.03361	1.83484	1.35773	0.0185702	0	0.0571838	0	0	0.158579	0	0.102542	2.64237	2.39274	1.93381	1.61684	NA	NA
dd_Smed_v6_10834_0_1	1939	-6.13438	0.708327	15.4435	8.5e-05	0.000389492	-5.01137	0.708327	11.9331	0.000551441	0.00247261	0	0	0.253038	0	0.456414	0	0.0740023	0	4.34874	5.01649	4.33372	3.9097	0	0	0.0997885	0	0.186962	0	0.0310135	0	3.35027	3.33336	3.34324	2.43208	0	0	0.0872946	0	0.180994	0	0.027976	0	3.82122	3.92204	3.52358	2.89621	PL06023B1D10	0.0164457
dd_Smed_v6_10835_0_1	5146	-3.55474	4.65934	69.0519	9.59e-17	2.07e-15	-2.82551	4.65934	46.8311	7.74e-12	1.22e-10	6.42668	1.75389	4.87098	7.8493	13.6011	5.54409	9.10228	6.4967	55.3053	71.0026	47.899	72.1946	0.997241	0.314445	0.723801	1.35586	2.09931	1.06091	1.43735	1.14228	16.0543	17.7773	13.9233	16.9219	0.940874	0.260042	0.633178	1.08925	2.03231	0.896952	1.29658	0.935047	18.3111	20.9168	14.6743	20.1512	NA	NA
dd_Smed_v6_10837_0_1	2748	-3.8494	0.794732	5.23735	0.0221069	0.0558776	-3.8707	0.794732	5.32503	0.0210213	0.0605162	0	0	1.20193	0	0.31949	0	0	0.843728	3.98358	5.59532	4.52923	3.1682	0	0	0.334453	0	0.0923447	0	0	0.277803	2.16546	2.62342	2.46543	1.39062	0	0	0.292578	0	0.0893972	0	0	0.227403	2.46986	3.08672	2.59841	1.656	NA	NA
dd_Smed_v6_10841_0_1	2456	-1.22027	2.87263	7.32121	0.00681455	0.0203006	-0.233419	2.87263	0.279489	0.597036	0.754619	6.21387	4.14556	3.98535	1.99559	12.5057	6.34281	6.3642	7.21387	9.79296	9.09239	11.2742	7.95421	2.02031	1.55728	1.24082	0.722266	4.04439	2.54315	2.10571	2.65761	5.95635	4.76991	6.8666	3.90645	1.90611	1.28785	1.08547	0.580243	3.9153	2.15012	1.89948	2.17545	6.79363	5.61228	7.23698	4.65194	NA	NA
dd_Smed_v6_10846_0_1	7572	-3.80567	2.98901	22.6486	1.95e-06	1.24e-05	-3.34306	2.98901	18.3084	1.88e-05	0.000113363	0.978898	0.106296	0.442816	4.16856	3.14925	0.37587	2.14607	2.23588	16.9966	22.6224	14.9562	25.8849	0.103231	0.0129515	0.0447183	0.489362	0.330346	0.0488817	0.230311	0.26717	3.3531	3.84937	2.95458	4.12334	0.0973961	0.0107107	0.0391194	0.393136	0.319802	0.0413272	0.207755	0.218699	3.82444	4.52917	3.11395	4.91022	NA	NA
dd_Smed_v6_10848_0_1	1812	0.456101	2.7069	0.864094	0.352596	0.509006	0.942257	2.7069	3.66814	0.055462	0.134419	7.4907	6.69667	7.78091	2.79382	6.98313	14.7999	7.03022	5.86391	6.10815	4.60649	2.93259	4.38156	3.30101	3.40967	3.28356	1.37055	3.061	8.04302	3.15278	2.92806	5.03554	3.27546	2.42091	2.91664	3.11443	2.81976	2.87245	1.10105	2.9633	6.8	2.844	2.39684	5.74338	3.85391	2.55149	3.47324	PL03019A2G01	0.210876
dd_Smed_v6_10849_0_1	1694	-1.50691	2.05403	6.42646	0.0112433	0.0312423	-1.55994	2.05403	6.88313	0.00870132	0.0285039	3.44742	1.3287	2.15082	3.19294	3.4231	1.59745	1.55405	3.20616	8.23272	7.28356	9.90565	3.43784	1.62504	0.723648	0.970876	1.67545	1.60501	0.928608	0.745476	1.71247	7.2598	5.53975	8.7469	2.44785	1.53319	0.598448	0.849318	1.346	1.55378	0.785095	0.672465	1.40179	8.28031	6.51808	9.21871	2.91499	PL06019B2G09	0.280043
dd_Smed_v6_1085_0_1	380	0.237402	3.86413	0.384012	0.535464	0.678093	-0.247538	3.86413	0.416602	0.518637	0.693795	16.1305	16.1039	12.4621	23.1044	13.4186	14.612	15.8365	4.59831	14.3409	16.4724	16.9439	9.77424	33.896	39.0984	25.0773	54.0464	28.0475	37.8655	33.8655	10.9488	56.375	55.8514	66.6981	31.0251	31.9801	32.3339	21.9375	43.419	27.1523	32.0135	30.5488	8.96242	64.2996	65.7149	70.2958	36.9458	NA	NA
dd_Smed_v6_10850_0_1	4534	-1.44438	1.53378	2.92031	0.0874709	0.175396	-0.536684	1.53378	0.421688	0.516096	0.692133	1.1917	3.40148	1.39171	0.0443463	1.8713	3.57077	1.51705	4.3452	5.70979	4.31708	3.81237	2.56152	0.209879	0.692148	0.234714	0.00869424	0.327818	0.775531	0.271894	0.867119	1.88119	1.22678	1.25776	0.681444	0.198016	0.572398	0.205327	0.00698464	0.317355	0.655675	0.245265	0.709803	2.14563	1.44344	1.32561	0.811488	NA	NA
dd_Smed_v6_10851_0_1	2435	-0.670834	1.87153	0.953573	0.328812	0.485366	0.46568	1.87153	0.467172	0.494291	0.673129	1.14914	0.850371	1.07541	5.85372	4.70106	5.87298	2.40507	6.74982	3.08727	3.32825	3.68203	4.17933	0.376841	0.322197	0.337713	2.13692	1.53345	2.37508	0.802624	2.5081	1.89396	1.76107	2.2619	2.07024	0.355541	0.266453	0.29543	1.71672	1.4845	2.00802	0.724016	2.05307	2.16019	2.07208	2.38391	2.46532	Contig1662	-0.257274
dd_Smed_v6_10852_0_1	1926	-0.54094	0.341179	0.209252	0.647355	0.76831	0.327308	0.341179	0.0778752	0.780198	0.878157	0.170243	0.903519	2.27734	0	2.37335	0.140951	0.999031	2.57337	1.32786	1.54354	1.40113	0.572973	0.0705824	0.432806	0.904158	0	0.978763	0.0720663	0.421508	1.20892	1.02989	1.03257	1.08819	0.358832	0.0665929	0.357925	0.790954	0	0.947523	0.0609287	0.380226	0.989591	1.17466	1.21493	1.14689	0.42731	NA	NA
dd_Smed_v6_10853_0_1	2109	-1.40862	3.08315	7.38566	0.00657459	0.0196908	-1.71892	3.08315	10.8105	0.00100928	0.00424254	2.12804	10.0982	4.61794	5.72068	8.67186	4.27553	3.1821	2.06713	13.4446	12.493	13.1967	20.7618	0.805724	4.41751	1.67434	2.41116	3.26594	1.99633	1.22608	0.886834	9.52281	7.63221	9.35992	11.8741	0.760183	3.65323	1.46471	1.93704	3.16169	1.6878	1.106	0.725942	10.8614	8.98007	9.8648	14.1402	NA	NA
dd_Smed_v6_10854_0_1	4756	-2.38468	2.33407	18.533	1.67e-05	8.8e-05	-2.62241	2.33407	22.0256	2.69e-06	1.93e-05	3.74535	1.00982	2.15082	1.46343	1.23232	2.53713	2.03506	1.30778	10.2245	10.7324	11.2742	11.6617	0.628831	0.19589	0.345808	0.273517	0.205803	0.525314	0.347711	0.248796	3.21141	2.90747	3.54591	2.95755	0.593288	0.161999	0.302512	0.219734	0.199235	0.444129	0.313657	0.203658	3.66283	3.42093	3.73718	3.52196	Contig3566	-0.15265
dd_Smed_v6_10855_0_1	1569	3.60243	3.92235	32.0323	1.52e-08	1.35e-07	3.35557	3.92235	28.4012	9.86e-08	9.13e-07	25.5365	1.11611	37.1333	30.3329	19.6714	17.525	20.4246	21.6838	1.82581	1.71236	1.4663	2.73005	12.9963	0.656292	18.0973	17.1849	9.95829	10.999	10.5783	12.5044	1.73831	1.40615	1.39792	2.09875	12.2618	0.542745	15.8314	13.8057	9.64045	9.29914	9.54224	10.2358	1.98266	1.65448	1.47333	2.49926	PL06023A2H08	0.474219
dd_Smed_v6_10858_0_1	1133	-2.79258	1.78387	3.91956	0.0477273	0.106461	-3.42068	1.78387	5.56507	0.0183223	0.0539402	0	4.67704	0	0	1.18668	1.50348	0.0370011	0.295305	8.4319	7.8865	7.23373	8.93163	0	3.80849	0	0	0.831906	1.30673	0.026538	0.235826	11.1171	8.96839	9.5503	9.50855	0	3.14958	0	0	0.805353	1.10478	0.0239389	0.193041	12.6798	10.5522	10.0654	11.3231	NA	NA
dd_Smed_v6_10859_0_1	1052	-1.4588	0.720586	1.30446	0.2534	0.401188	-1.67697	0.720586	1.70683	0.191398	0.352178	0	3.56093	0.506076	0	0.410772	1.4565	1.40604	0.210932	3.95038	2.96648	2.24832	2.02226	0	3.12291	0.367851	0	0.31014	1.36337	1.08609	0.181417	5.60942	3.63317	3.19689	2.31864	0	2.58261	0.321795	0	0.300241	1.15266	0.97972	0.148503	6.39793	4.2748	3.36933	2.76112	NA	NA
dd_Smed_v6_1086_0_1	584	-5.53962	4.76106	45.3214	1.67e-11	2.12e-10	-5.28426	4.76106	42.3675	7.56e-11	1.08e-09	0.0425608	2.33852	0.695854	3.54771	1.36924	1.31555	0.518016	4.72487	57.8283	100.692	100.36	50.6912	0.0581942	3.69437	0.911125	5.39995	1.86225	2.21826	0.720797	7.32029	147.918	222.147	257.058	104.697	0.054905	3.0552	0.797049	4.33813	1.80282	1.87543	0.650203	5.99222	168.711	261.379	270.924	124.677	Contig3293	0.258533
dd_Smed_v6_10861_0_1	1537	1.09756	2.24813	3.31844	0.0685067	0.144123	1.60678	2.24813	6.98963	0.00819833	0.0270722	2.25572	1.38185	8.98284	6.82934	7.89596	5.96694	7.62224	6.15921	1.52704	2.33942	2.76967	2.42671	1.17191	0.829469	4.46902	3.94966	4.0804	3.82293	4.02987	3.62579	1.48413	1.96108	2.6955	1.90439	1.10567	0.685961	3.90948	3.17302	3.95016	3.23211	3.63519	2.96798	1.69275	2.30741	2.84089	2.26782	NA	NA
dd_Smed_v6_10866_0_1	1514	2.59501	3.40329	31.3564	2.15e-08	1.87e-07	2.66678	3.40329	32.9856	9.28e-09	1e-07	15.8752	9.99186	19.1044	11.9735	16.7504	17.9008	14.1344	11.0528	1.29466	3.61766	3.48653	0.977424	8.3729	6.08881	9.64893	7.02993	8.78761	11.643	7.58639	6.60539	1.2774	3.07866	3.4447	0.7787	7.89964	5.03537	8.44085	5.64759	8.50713	9.84364	6.84339	5.40702	1.45696	3.62236	3.63051	0.927304	NA	NA
dd_Smed_v6_10868_0_1	622	-1.15094	-0.202352	0.443596	0.505392	0.652657	-8.36745	-0.202352	12.303	0.000452233	0.00206699	0	0	0	2.88251	0	0	0	0	1.09548	1.9053	0.814609	2.62893	0	0	0	4.11942	0	0	0	0	2.63094	3.9467	1.95904	5.09803	0	0	0	3.30939	0	0	0	0	3.00076	4.64369	2.06471	6.07092	NA	NA
dd_Smed_v6_10869_0_1	1362	-0.084909	-0.297691	0.00420801	0.948278	0.969988	0.00815688	-0.297691	3.9e-05	0.995019	0.997145	0.0851216	0.850371	0.506076	1.37474	0.0456414	1.59745	1.11003	0.253118	0.962698	0.820003	1.20562	0	0.0499052	0.576028	0.284126	0.897217	0.0266167	1.15497	0.662281	0.16815	1.05586	0.775709	1.32409	0	0.0470844	0.476368	0.248552	0.720792	0.0257671	0.976469	0.597418	0.137644	1.20428	0.9127	1.39552	0	PL010001001A09	-0.0158079
dd_Smed_v6_1087_0_1	2610	0.566369	5.917	4.5891	0.0321759	0.0767639	0.52979	5.917	4.02215	0.0449063	0.113311	68.2675	52.4041	94.8892	57.7389	55.7281	62.0186	65.64	82.9806	46.641	44.0149	49.4305	44.4222	20.8861	18.5241	27.8003	19.6645	16.9592	23.3992	20.4367	28.7665	26.6945	21.728	28.3295	20.5293	19.7055	15.3192	24.3196	15.7978	16.4179	19.7829	18.4352	23.5476	30.447	25.5652	29.8576	24.447	PL06009A1C01	-0.0701349
dd_Smed_v6_10872_0_1	2836	-0.904708	1.06543	0.881301	0.347846	0.50438	-0.701747	1.06543	0.535988	0.4641	0.646835	2.80901	0.531482	2.6569	0	2.28207	2.34919	1.25804	1.01247	2.95449	3.13531	2.47641	2.66264	0.790916	0.1729	0.716376	0	0.639138	0.815701	0.360471	0.323019	1.55622	1.42441	1.30617	1.13245	0.746212	0.142986	0.626683	0	0.618738	0.689637	0.325167	0.264416	1.77497	1.67596	1.37663	1.34856	NA	NA
dd_Smed_v6_10873_0_1	593	-8.79744	-0.274778	22.5345	2.06e-06	1.31e-05	-8.79744	-0.274778	23.4815	1.26e-06	9.62e-06	0	0	0	0	0	0	0	0	1.59343	3.59354	2.18315	1.31447	0	0	0	0	0	0	0	0	4.01396	7.8078	5.50698	2.67367	0	0	0	0	0	0	0	0	4.5782	9.18667	5.80404	3.18391	PL04023B1D03	0.0141251
dd_Smed_v6_10874_0_1	323	-2.13813	-0.130712	1.94737	0.162871	0.286561	-0.295764	-0.130712	0.04109	0.839364	0.913393	0.468169	0	0.632595	0	1.3236	2.58411	0.0740023	0	1.19507	1.56765	1.07528	1.04483	1.1574	0	1.4976	0	3.25481	7.8782	0.186177	0	5.52696	6.25328	4.97972	3.90173	1.09198	0	1.31009	0	3.15093	6.66065	0.167943	0	6.30388	7.35762	5.24833	4.64632	NA	NA
dd_Smed_v6_10875_0_1	313	-2.72096	2.23697	11.7047	0.000623422	0.00239452	-2.69991	2.23697	11.5842	0.000665144	0.00292708	2.00036	0	2.97319	1.46343	3.1949	1.22158	0.888028	1.2234	9.79296	10.5395	10.9484	11.1898	5.10324	0	7.2636	4.15607	8.10745	3.84323	2.3055	3.53653	46.7374	43.3844	52.3225	43.1213	4.8148	0	6.35417	3.33884	7.84868	3.24927	2.0797	2.89492	53.3072	51.0462	55.1448	51.3504	NA	NA
dd_Smed_v6_10876_0_1	723	-0.205747	3.61302	0.379772	0.537725	0.679842	-0.0747636	3.61302	0.0504201	0.822334	0.90357	12.4703	14.2437	10.1215	8.07103	10.9996	10.9942	9.84231	17.3386	14.5069	11.9865	12.0236	13.2795	13.7728	18.1759	10.7048	9.92307	12.084	14.9742	11.0622	21.6983	29.973	21.3607	24.8761	22.1542	12.9943	15.0313	9.36454	7.97184	11.6983	12.66	9.97878	17.7618	34.1862	25.133	26.2179	26.382	Contig2046	-0.0921969
dd_Smed_v6_10877_0_1	793	-0.156054	2.49423	0.0283128	0.866375	0.918021	-0.759838	2.49423	0.6636	0.415292	0.603378	2.93669	0	9.3624	11.7518	0.912827	2.0203	4.44014	8.43728	3.12047	3.03884	13.2618	7.38124	2.95712	0	9.0279	13.173	0.914297	2.50878	4.54994	9.62675	5.87816	4.93735	25.0158	11.2271	2.78998	0	7.89757	10.5827	0.885115	2.12106	4.10433	7.88023	6.70445	5.8093	26.3652	13.3697	NA	NA
dd_Smed_v6_10879_0_1	1501	0.978099	1.2825	1.36842	0.242083	0.388179	0.139617	1.2825	0.0282605	0.866498	0.92932	4.72425	4.83648	3.66905	0.48781	0.593338	2.72506	3.70012	0.632796	2.19097	1.88118	1.59663	1.28076	2.51325	2.97277	1.86916	0.288885	0.313974	1.78778	2.00317	0.381447	2.18047	1.61477	1.59114	1.0292	2.37119	2.45844	1.63513	0.23208	0.303952	1.51149	1.80698	0.312243	2.48698	1.89994	1.67697	1.22561	NA	NA
dd_Smed_v6_1088_0_1	2665	5.78955	7.29847	264.189	2.1e-59	5.2e-57	5.73917	7.29847	260.824	1.13e-58	3.24e-56	241.703	179.747	265.247	265.191	198.449	257.612	249.351	213.801	3.12047	5.59532	5.53934	2.89857	72.4215	62.2267	76.1072	88.4539	59.1457	95.1893	76.032	72.5876	1.74911	2.70513	3.10918	1.3119	68.3281	51.4608	66.5783	71.0607	57.2579	80.4781	68.5855	59.4185	1.99498	3.18286	3.27689	1.56225	PL06010A1C04	0.058081
dd_Smed_v6_10881_0_1	1117	-0.376258	2.26701	0.500495	0.479283	0.629493	-0.636817	2.26701	1.42762	0.232154	0.407642	5.74571	3.61408	6.38921	2.3947	5.02055	1.87935	3.3301	4.89362	5.6434	4.58237	6.90789	6.40381	4.10746	2.98508	4.37388	1.9057	3.57002	1.65681	2.42263	3.96395	7.54714	5.28564	9.25074	6.9151	3.8753	2.46863	3.82625	1.53097	3.45607	1.40076	2.18536	3.24479	8.60803	6.21909	9.74973	8.23475	NA	NA
dd_Smed_v6_10882_0_1	1386	-0.572387	2.5736	1.4441	0.229477	0.372058	-0.0216968	2.5736	0.00210877	0.963373	0.982139	3.87303	4.305	4.3649	5.27721	7.07441	8.26915	3.0711	7.72011	7.03765	3.85884	8.04834	7.58346	2.23137	2.86564	2.40815	3.38452	4.05414	5.87512	1.80058	5.03977	7.58506	3.58718	8.68615	6.5996	2.10525	2.36985	2.10664	2.719	3.92474	4.96714	1.62424	4.12544	8.65129	4.22069	9.15469	7.85904	Contig2441	-0.0644502
dd_Smed_v6_10883_0_1	1775	1.27987	2.40677	4.7943	0.0285541	0.0696022	1.65297	2.40677	7.87996	0.00499857	0.0176367	6.21387	1.96648	5.94639	9.04665	2.78412	9.5847	6.66021	11.0106	1.8922	2.24295	3.58428	1.82003	2.79542	1.02212	2.5617	4.53049	1.24584	5.31739	3.0491	5.61261	1.59244	1.6281	3.02056	1.23678	2.63742	0.845285	2.24096	3.63963	1.20607	4.49561	2.75048	4.59435	1.81629	1.91563	3.1835	1.47281	PL04023B1E11	0.157466
dd_Smed_v6_10885_0_1	1258	-0.334407	2.13943	0.304418	0.581126	0.715098	-0.359353	2.13943	0.352361	0.552779	0.72137	3.02182	3.61408	4.49142	4.8781	7.02877	0.704757	3.1821	4.80925	5.27824	4.67884	4.56181	5.66232	1.9181	2.65051	2.73008	3.44687	4.43783	0.551668	2.05549	3.45897	6.26763	4.79201	5.42427	5.42909	1.80968	2.19194	2.38827	2.76909	4.29618	0.466409	1.85418	2.83143	7.14866	5.63829	5.71686	6.46515	NA	NA
dd_Smed_v6_10888_0_1	3511	-2.01706	1.67965	3.33374	0.0678725	0.143064	-1.04261	1.67965	0.944256	0.331186	0.521911	3.91559	0	1.39171	0	3.74259	1.40951	0.888028	4.42957	4.94627	6.94591	4.46406	5.22416	0.890533	0	0.303103	0	0.846669	0.395328	0.205531	1.14151	2.10447	2.54893	1.90188	1.79473	0.840198	0	0.265153	0	0.819645	0.334231	0.185402	0.934417	2.40029	2.99908	2.00447	2.13723	NA	NA
dd_Smed_v6_10889_0_1	4653	-1.06356	3.5797	5.06025	0.0244807	0.0609974	-0.236084	3.5797	0.256607	0.612461	0.765896	6.17131	9.61982	10.248	3.28163	25.194	5.30917	8.47326	12.9934	15.8015	13.8677	11.0787	20.4585	1.05908	1.90742	1.68415	0.626919	4.30067	1.1236	1.47979	2.52662	5.07295	3.84	3.56155	5.30339	0.999216	1.57741	1.47329	0.503645	4.16341	0.949953	1.33486	2.06824	5.78605	4.51816	3.75367	6.31547	NA	NA
dd_Smed_v6_1089_0_1	1010	-0.135605	6.0704	0.329219	0.566119	0.703286	0.0320144	6.0704	0.0183897	0.892131	0.943941	62.0536	59.0476	65.6633	63.2379	80.1919	71.4154	66.0101	63.1952	74.4265	61.3797	76.0519	62.7911	49.0602	53.9378	49.7135	55.6559	63.0639	69.6289	53.1094	56.6127	110.078	78.3003	112.635	74.9876	46.2872	44.6059	43.4892	44.712	61.0511	58.868	47.9079	46.3418	125.552	92.1283	118.711	89.298	Contig6159	-0.833666
dd_Smed_v6_10891_0_1	2666	-2.05037	1.31009	2.67754	0.101773	0.197772	-2.12263	1.31009	2.85475	0.0911042	0.201066	1.57475	0	0.126519	2.9712	3.4231	0	0.703022	0.337491	4.41513	5.9812	2.15057	6.94308	0.471666	0	0.0362884	0.990667	1.01984	0	0.214285	0.114539	2.47388	2.8906	1.20664	3.14127	0.445006	0	0.031745	0.795866	0.987288	0	0.193298	0.0937588	2.82163	3.40109	1.27173	3.74074	NA	NA
dd_Smed_v6_10892_0_1	1763	-3.45313	-0.467719	4.15533	0.0415038	0.0950719	-8.46796	-0.467719	14.9622	0.000109684	0.000569266	0	0	0.632595	0	0	0	0	0	1.36106	1.88118	2.11798	1.5504	0	0	0.274376	0	0	0	0	0	1.15324	1.3748	1.79703	1.06073	0	0	0.240023	0	0	0	0	0	1.31535	1.61759	1.89396	1.26315	NA	NA
dd_Smed_v6_10893_0_1	3536	-6.89352	2.25272	27.7972	1.35e-07	1.04e-06	-3.41059	2.25272	9.94943	0.00160899	0.00644996	0	0	0.442816	0	0.638979	2.39617	0	1.72964	9.49419	15.4112	9.67756	16.1781	0	0	0.09576	0	0.143531	0.667306	0	0.442583	4.01089	5.61546	4.09391	5.51858	0	0	0.0837704	0	0.13895	0.564176	0	0.362288	4.57469	6.60716	4.31473	6.57172	PL08004A2A12	-0.0878807
dd_Smed_v6_10894_0_1	1287	0.225392	2.92538	0.181567	0.67003	0.784461	-0.0517645	2.92538	0.00958343	0.922016	0.959743	9.40593	3.34834	9.995	10.9092	10.2693	1.83237	5.25416	10.42	10.2909	6.53591	5.73485	6.23529	5.83588	2.40028	5.9385	7.53476	6.33774	1.40202	3.31748	7.32557	11.9445	6.54316	6.66543	5.84375	5.50603	1.98501	5.19498	6.05316	6.13545	1.18534	2.99257	5.99654	13.6236	7.6987	7.02496	6.95894	Contig4038	-0.139254
dd_Smed_v6_10897_0_1	751	-0.0578024	2.30153	0.0140969	0.905489	0.943112	0.0743282	2.30153	0.023439	0.878321	0.936344	4.17096	2.92315	6.19943	5.27721	4.56414	5.68504	4.44014	5.65297	5.07906	6.07767	3.1281	5.02194	4.43485	3.59106	6.31225	6.24626	4.82715	7.4544	4.8044	6.81064	10.1027	10.427	6.23053	8.06575	4.18418	2.96977	5.52193	5.01802	4.67308	6.30235	4.33386	5.57503	11.5228	12.2684	6.56661	9.60498	Contig6598	0.153757
dd_Smed_v6_10898_0_1	1626	1.25164	1.93125	4.1609	0.0413675	0.0948679	1.1926	1.93125	3.79176	0.0515054	0.126699	4.89449	1.59445	5.50357	6.87368	5.34004	5.2152	2.25707	5.31548	2.35695	2.53236	1.40113	1.61781	2.40364	0.904693	2.58819	3.75772	2.60853	3.15842	1.128	2.95783	2.16533	2.00662	1.28897	1.2001	2.26778	0.74817	2.26414	3.01882	2.52527	2.67029	1.01752	2.42121	2.46971	2.361	1.35849	1.42913	NA	NA
dd_Smed_v6_10899_0_1	1998	0.112455	1.21494	0.019834	0.888002	0.931544	-0.646277	1.21494	0.648043	0.420813	0.607972	3.44742	1.16926	5.63009	0.48781	1.27796	0.845708	2.62708	1.5609	2.29056	2.00177	3.32361	2.29189	1.37779	0.539918	2.15473	0.217025	0.508034	0.416816	1.06847	0.706853	1.71254	1.29086	2.48828	1.3836	1.29991	0.446506	1.88495	0.17435	0.491819	0.352398	0.963822	0.578613	1.95327	1.51883	2.62249	1.64764	NA	NA
dd_Smed_v6_1090_0_1	410	1.75916	7.89365	49.0595	2.48e-12	3.48e-11	1.83332	7.89365	53.0497	3.25e-13	5.96e-12	309.928	284.502	299.154	321.334	353.766	303.609	325.832	295.811	80.767	81.2768	96.9059	99.9669	603.614	640.197	557.935	696.671	685.337	729.206	645.792	652.801	294.269	255.413	353.55	294.094	569.497	529.436	488.079	559.68	663.463	616.51	582.544	534.368	335.634	300.519	372.621	350.217	NA	NA
dd_Smed_v6_10900_0_1	1207	-9.65904	0.530227	26.1254	3.2e-07	2.32e-06	-5.64505	0.530227	14.9935	0.00010788	0.000560564	0	0	0	0	0	0	0	0.295305	5.01267	4.82355	2.90001	3.06709	0	0	0	0	0	0	0	0.221367	6.20378	5.14896	3.59399	3.06501	0	0	0	0	0	0	0	0.181206	7.07584	6.05828	3.78785	3.64993	Contig6001	-0.0512163
dd_Smed_v6_10901_0_1	1037	0.996872	0.0120588	0.442657	0.505843	0.653047	0.0962086	0.0120588	0.00420067	0.948323	0.974879	2.04292	0	1.45497	1.99559	0.410772	0	2.51608	0	1.16188	0.482355	0.293259	0.808903	1.5731	0	1.07287	1.71059	0.314626	0	1.97164	0	1.67369	0.599305	0.423017	0.940872	1.48418	0	0.938543	1.37423	0.304584	0	1.77854	0	1.90896	0.705144	0.445834	1.12042	NA	NA
dd_Smed_v6_10902_0_1	1932	-0.45793	1.44274	0.260909	0.609496	0.739411	-0.245167	1.44274	0.0752209	0.783882	0.880531	4.554	0	2.21408	2.17297	3.05797	1.36253	2.33107	3.62803	1.72622	2.72531	2.80226	5.05564	1.88222	0	0.876313	0.999774	1.25718	0.694477	0.980463	1.69908	1.3347	1.81747	2.16963	3.15633	1.77583	0	0.766595	0.803183	1.21706	0.587148	0.884438	1.39083	1.52231	2.13844	2.28666	3.75867	PL06012B2G03	-0.153057
dd_Smed_v6_10905_0_1	918	0.53716	2.14026	0.936946	0.333065	0.489503	-0.39226	2.14026	0.496386	0.481092	0.66188	6.299	2.92315	3.22623	10.9979	3.24054	3.42982	3.2931	2.36244	4.81349	3.83472	4.36631	3.1682	5.47913	2.93779	2.68736	10.6493	2.80379	3.67915	2.91504	2.32846	7.83271	5.38209	7.11469	4.16278	5.16944	2.42952	2.35089	8.55529	2.7143	3.11055	2.62955	1.90602	8.93375	6.33258	7.49846	4.95719	Contig5626	0.144803
dd_Smed_v6_10906_0_1	544	-1.41936	0.719812	1.47034	0.225293	0.367405	-0.899957	0.719812	0.607558	0.435709	0.622116	2.63877	0	1.01215	0	1.91694	1.40951	1.29504	0.632796	2.98768	2.29119	2.24832	2.29189	3.87334	0	1.42272	0	2.79886	2.55146	1.93449	1.05248	8.20409	5.42652	6.18221	5.08169	3.65441	0	1.24459	0	2.70953	2.15714	1.74503	0.861538	9.35733	6.38486	6.51569	6.05146	NA	NA
dd_Smed_v6_10908_0_1	876	0.17106	-0.12588	0.0191031	0.890071	0.932895	0.453474	-0.12588	0.134549	0.713761	0.83714	0.723533	2.07278	0.316297	0.133039	0.182565	2.0203	1.07303	0.674982	0	1.01295	0.684272	1.17965	0.659535	2.18304	0.276099	0.134999	0.165534	2.27107	0.995387	0.69717	0	1.48985	1.16845	1.62428	0.622256	1.80535	0.24153	0.108453	0.16025	1.92009	0.8979	0.570687	0	1.75296	1.23147	1.93426	NA	NA
dd_Smed_v6_1091_0_1	619	2.38162	3.73554	2.97908	0.0843471	0.170223	-10.353	3.73554	24.8409	6.23e-07	5.01e-06	0	21.3124	0.442816	111.62	0	0	0	0	0.0995894	11.7453	1.56405	12.1672	0	31.7654	0.547023	160.29	0	0	0	0	0.240335	24.4475	3.77959	23.7091	0	26.2696	0.478534	128.771	0	0	0	0	0.274119	28.765	3.98346	28.2336	Contig540	-2.60063
dd_Smed_v6_10910_0_1	1832	6.99224	4.20544	118.004	1.73e-27	7.5e-26	6.84099	4.20544	114.28	1.13e-26	5.09e-25	22.2167	32.1015	22.2041	39.0691	16.796	38.0569	21.8307	27.4211	0.132786	0.0241177	0.684272	0.0674085	9.68362	16.1663	9.26787	18.9567	7.28204	20.4563	9.68332	13.5429	0.108273	0.0169618	0.558711	0.0443816	9.13628	13.3694	8.10749	15.2292	7.04961	17.2948	8.73495	11.0859	0.123493	0.0199573	0.588849	0.0528512	Contig7029	1.82294
dd_Smed_v6_10911_0_1	3203	-4.17937	0.84159	14.0833	0.000174886	0.000753463	-2.0075	0.84159	4.05478	0.0440464	0.11159	0.468169	0	0.379557	0	0.410772	1.26856	1.51705	0.674982	5.37783	3.32825	4.13822	2.79745	0.116716	0	0.0906134	0	0.101863	0.390008	0.38488	0.190672	2.5081	1.33881	1.93259	1.05346	0.110118	0	0.0792683	0	0.0986117	0.329734	0.347185	0.156079	2.86066	1.57525	2.03684	1.2545	NA	NA
dd_Smed_v6_10912_0_1	723	-0.00894885	1.66309	0.000164061	0.98978	0.995159	0.532027	1.66309	0.581506	0.445722	0.629817	2.59621	4.73019	2.59364	0.798234	1.27796	2.72506	6.88221	4.68269	1.95859	3.28001	2.90001	2.62893	2.86737	6.03604	2.74311	0.981402	1.40395	3.71156	7.73522	5.86014	4.04669	5.84517	5.99992	4.38586	2.7053	4.99173	2.39966	0.788424	1.35913	3.13795	6.97764	4.79697	4.61553	6.87744	6.32356	5.22284	NA	NA
dd_Smed_v6_10914_0_1	914	-1.2031	0.485464	1.08661	0.297224	0.44955	-0.663106	0.485464	0.337993	0.56099	0.727244	1.83011	0	0.126519	1.33039	1.18668	1.69142	1.81306	0.126559	3.18686	2.12236	0.814609	1.51669	1.59888	0	0.105848	1.29386	1.03124	1.82231	1.61194	0.125285	5.20849	2.99181	1.33318	2.00154	1.50851	0	0.0925953	1.03944	0.99832	1.54068	1.45407	0.102555	5.94064	3.52016	1.40509	2.38351	Contig1238	-0.421963
dd_Smed_v6_10915_0_1	1655	4.25062	3.81098	66.0544	4.39e-16	8.92e-15	4.17832	3.81098	64.248	1.1e-15	2.51e-14	18.3437	25.2985	15.2455	24.7896	8.94571	37.3521	15.0965	18.2245	0.630733	2.12236	0.944947	0.640381	8.85059	14.1029	7.04397	13.3146	4.29327	22.2247	7.41242	9.96343	0.569301	1.65227	0.854071	0.466717	8.35033	11.663	6.16203	10.6964	4.15624	18.79	6.68646	8.15583	0.649328	1.94407	0.90014	0.555784	Contig2562	0.70817
dd_Smed_v6_10916_0_1	1050	0.995084	2.68798	2.66568	0.102534	0.198949	0.719789	2.68798	1.40712	0.235535	0.411983	8.21423	17.4858	5.25054	1.90689	3.33182	10.1015	9.39829	4.30301	4.44833	4.58237	5.27867	2.15707	6.24685	15.3641	3.82373	1.61433	2.52037	9.47363	7.27348	3.70795	6.32852	5.62291	7.52003	2.47793	5.89376	12.7059	3.34498	1.29689	2.43992	8.00951	6.56113	3.03524	7.21811	6.61593	7.92566	2.95081	Contig6685	0.0313911
dd_Smed_v6_10917_0_1	1458	4.22413	4.54734	85.581	2.22e-20	6.39e-19	3.9597	4.54734	76.9839	1.72e-18	4.87e-17	42.2203	39.3297	39.6004	27.2287	45.9152	19.1694	29.1569	29.2773	0.497947	2.09824	3.1281	2.19078	23.1231	24.8871	20.769	16.6006	25.0133	12.947	16.2505	18.1687	0.510176	1.85421	3.20928	1.8124	21.8162	20.5814	18.1686	13.3363	24.2149	10.9461	14.6589	14.8725	0.581891	2.18167	3.38239	2.15827	NA	NA
dd_Smed_v6_10919_0_1	675	0.134558	2.46578	0.0719258	0.788553	0.86885	0.268349	2.46578	0.287197	0.592023	0.750947	6.38412	3.02945	7.71765	4.61202	6.70928	2.913	6.99322	7.21387	3.31965	5.20943	4.7899	6.47122	7.55232	4.14068	8.74288	6.07355	7.89485	4.24967	8.41891	9.66975	7.34654	9.94367	10.6147	11.5637	7.12545	3.42429	7.64823	4.87927	7.64287	3.5929	7.59438	7.91543	8.37924	11.6997	11.1873	13.7704	Contig3546	0.302793
dd_Smed_v6_1092_0_1	784	-1.63569	4.34299	10.5853	0.00113993	0.00415486	-2.61741	4.34299	25.2322	5.08e-07	4.17e-06	9.10801	28.7532	6.38921	8.29277	5.2944	10.7593	7.21522	3.33272	37.0473	58.0032	52.7541	15.4703	9.27664	33.8362	6.23166	9.4024	5.3638	13.5141	7.47853	3.84622	70.5886	95.3226	100.653	23.801	8.7523	27.9821	5.45143	7.55355	5.1926	11.4255	6.7461	3.14842	80.5112	112.157	106.082	28.3431	Contig3479	-0.961363
dd_Smed_v6_10921_0_1	1888	-4.16647	1.55296	15.0839	0.000102835	0.000464208	-3.05461	1.55296	9.10695	0.00254641	0.00973221	1.02146	0	0.569335	0	1.23232	1.03364	1.03603	0.168746	8.99624	6.92179	6.6798	6.37011	0.432018	0	0.230589	0	0.518433	0.539123	0.445917	0.0808688	7.11793	4.72364	5.29231	4.06966	0.4076	0	0.201718	0	0.501885	0.455803	0.402244	0.0661973	8.1185	5.55784	5.57779	4.8463	PL06015A1B11	-0.148858
dd_Smed_v6_10923_0_1	958	6.16048	3.30536	62.1247	3.22e-15	6.07e-14	5.92916	3.30536	58.68	1.86e-14	3.79e-13	16.9392	21.7376	20.6858	3.85813	13.7837	7.70534	16.4285	15.9043	0.298768	0.506473	0	0.0337043	14.1192	20.9343	16.5113	3.57987	11.428	7.92037	13.9353	15.021	0.465869	0.681162	0	0.0424358	13.3212	17.3124	14.444	2.87594	11.0633	6.6963	12.5705	12.2958	0.531356	0.801457	0	0.0505341	Contig3199	0.549921
dd_Smed_v6_10924_0_1	1844	-1.06002	-0.638737	0.421094	0.516392	0.66224	-2.34326	-0.638737	1.90075	0.167994	0.319451	0.55329	0	0	1.33039	0	0.0939676	0.666021	0	0.464751	1.54354	0.814609	1.14595	0.239594	0	0	0.641318	0	0.0501806	0.293501	0	0.37649	1.07849	0.660804	0.749577	0.226051	0	0	0.515212	0	0.0424254	0.264756	0	0.429413	1.26895	0.696449	0.892623	PL04010B2D02	0.175021
dd_Smed_v6_10925_0_1	839	-1.75885	0.804001	2.36583	0.124018	0.232198	0.238258	0.804001	0.0469166	0.828518	0.906725	0.680972	0	1.70801	0	1.23232	4.08759	2.59008	1.60308	2.52293	2.60472	1.01012	1.92114	0.648113	0	1.55668	0	1.16663	4.7976	2.50861	1.7288	4.49198	3.99999	1.80092	2.76192	0.61148	0	1.36178	0	1.12939	4.05615	2.26292	1.41515	5.12342	4.70639	1.89806	3.28899	NA	NA
dd_Smed_v6_10926_0_1	2559	-5.17993	0.463516	9.24405	0.00236262	0.00801325	-3.40336	0.463516	4.87014	0.0273253	0.0754085	0	0	0.379557	0	0	0.610789	0.666021	0	4.7471	2.94236	1.95506	4.07822	0	0	0.113417	0	0	0.235039	0.211495	0	2.7711	1.48145	1.14281	1.92227	0	0	0.099217	0	0	0.198715	0.190781	0	3.16063	1.74307	1.20446	2.2891	NA	NA
dd_Smed_v6_10927_0_1	1507	3.76413	0.752994	14.877	0.000114754	0.000512549	3.63992	0.752994	14.062	0.000176885	0.000875825	3.27718	1.27556	3.35275	1.86255	4.01644	1.1746	2.62708	1.13903	0.365161	0.168824	0.0325844	0.134817	1.73648	0.780906	1.70122	1.09862	2.1169	0.767527	1.41659	0.68387	0.361965	0.144338	0.032343	0.107906	1.63833	0.6458	1.48822	0.882595	2.04933	0.648909	1.27785	0.5598	0.412846	0.169829	0.0340876	0.128498	Contig5244	0.315686
dd_Smed_v6_10928_0_1	397	0.228136	1.15843	0.0517894	0.819978	0.887617	1.17638	1.15843	1.35398	0.244583	0.423578	0.255365	0	3.03645	3.54771	1.8713	2.39617	4.62514	4.30301	0.863108	1.15765	1.88989	1.92114	0.513634	0	5.84856	7.94351	3.7439	5.94356	9.46711	9.80692	3.24765	3.75706	7.12084	5.8369	0.484602	0	5.1163	6.38153	3.6244	5.025	8.53991	8.02772	3.70417	4.42056	7.50494	6.9508	NA	NA
dd_Smed_v6_1093_0_1	761	4.82459	6.76838	174.015	9.83e-40	8.02e-38	5.11673	6.76838	190.529	2.44e-43	2.52e-41	114.701	116.341	142.144	205.368	156.322	164.349	135.165	252.612	3.88399	6.17414	6.74497	3.57265	120.356	141.046	142.829	239.885	163.157	212.668	144.332	300.345	7.62409	10.4533	13.258	5.66265	113.553	116.644	124.946	192.715	157.95	179.801	130.196	245.855	8.6958	12.2993	13.9732	6.74328	NA	NA
dd_Smed_v6_10930_0_1	705	-0.0655411	1.3693	0.00333379	0.953957	0.973856	-0.25391	1.3693	0.0499967	0.823069	0.903974	4.17096	3.45463	2.6569	0	2.92105	3.99362	2.10907	0	2.52293	3.6659	3.42136	1.14595	4.72422	4.5209	2.88176	0	3.29095	5.57824	2.43099	0	5.34578	6.69964	7.25929	1.9606	4.45719	3.73873	2.52096	0	3.18591	4.71614	2.1929	0	6.09723	7.88281	7.65086	2.33475	Contig7049	-0.0847775
dd_Smed_v6_10933_0_1	1166	0.404704	0.358614	0.103982	0.747102	0.840234	1.01632	0.358614	0.647574	0.420981	0.608028	2.63877	0	0.822373	0.931273	1.46052	3.42982	1.85006	0	0.962698	0.940592	0.944947	0.47186	1.80712	0	0.539316	0.70996	0.994906	2.89662	1.28935	0	1.23335	1.03935	1.21225	0.488121	1.70497	0	0.471791	0.570356	0.963151	2.44896	1.16307	0	1.40672	1.2229	1.27764	0.581272	NA	NA
dd_Smed_v6_10934_0_1	2081	-0.52058	2.79219	1.31781	0.250986	0.398568	-0.732596	2.79219	2.6015	0.106763	0.226712	3.02182	9.30093	6.89528	5.72068	4.88363	3.1949	6.73421	6.66545	7.43601	9.40592	8.43935	10.4483	1.15952	4.1235	2.53369	2.4436	1.86398	1.51183	2.62965	2.89806	5.3378	5.82357	6.06627	6.05603	1.09398	3.41009	2.21646	1.9631	1.80449	1.27818	2.3721	2.37229	6.08813	6.85203	6.39348	7.21174	NA	NA
dd_Smed_v6_10935_0_1	2689	-0.305611	1.55421	0.0931093	0.760261	0.849276	-0.0596707	1.55421	0.00356851	0.952365	0.976754	1.83011	4.4113	3.79557	0	0.273848	5.87298	4.51414	1.2234	2.75531	4.14825	2.31349	3.1682	0.543464	1.51352	1.07934	0	0.0808893	2.15073	1.36417	0.411652	1.53064	1.98763	1.28695	1.42113	0.512746	1.25166	0.944203	0	0.0783075	1.81834	1.23056	0.336969	1.7458	2.33864	1.35637	1.69234	Contig4781	0.352046
dd_Smed_v6_10936_0_1	1126	0.140194	1.11426	0.0185135	0.891771	0.934115	1.60033	1.11426	2.32211	0.127547	0.258905	0.680972	0	0.506076	4.16856	3.87952	5.77901	0.740023	4.42957	1.32786	1.78471	0.814609	0.94372	0.482919	0	0.343676	3.29081	2.7366	5.05398	0.534059	3.55938	1.7616	2.04216	1.08217	1.01092	0.455624	0	0.300647	2.64372	2.64925	4.27291	0.481754	2.91362	2.00923	2.40281	1.14054	1.20384	NA	NA
dd_Smed_v6_10939_0_1	1975	-2.39024	0.0494628	3.36357	0.0666536	0.140947	0.0457185	0.0494628	0.00141631	0.96998	0.985188	0	0	0.948892	0.0443463	2.41899	1.12761	0.666021	1.09685	1.12868	0.723532	1.33596	1.95485	0	0	0.367386	0.0199593	0.972835	0.562226	0.274033	0.502492	0.853686	0.47201	1.01184	1.19388	0	0	0.321388	0.0160346	0.941785	0.475336	0.247195	0.411328	0.973689	0.555368	1.06642	1.42171	NA	NA
dd_Smed_v6_1094_0_1	1295	0.517928	6.76019	2.82651	0.0927195	0.183677	0.592042	6.76019	3.6892	0.054766	0.132977	116.319	105.074	142.65	108.471	138.658	89.927	93.3539	175.453	79.8707	75.7538	52.9822	121.369	71.7237	74.8579	84.2316	74.456	85.045	68.3816	58.5795	122.586	92.1324	75.3694	61.199	113.045	67.6697	61.9066	73.6855	59.8153	82.3305	57.8135	52.8423	100.346	105.083	88.6798	64.5001	134.618	Contig1842	0.144519
dd_Smed_v6_10941_0_1	3027	0.466281	-0.154894	0.118477	0.730692	0.828732	0.0407353	-0.154894	0.000907189	0.975972	0.987495	0.638412	0	0.316297	3.01555	0.228207	1.1746	1.55405	0	0.697126	0.723532	0.782025	0.674085	0.168411	0	0.0799017	0.885543	0.0598809	0.382115	0.417191	0	0.344028	0.307968	0.386449	0.268606	0.158892	0	0.0698976	0.711413	0.0579696	0.323061	0.376332	0	0.392387	0.362356	0.407295	0.319866	NA	NA
dd_Smed_v6_10942_0_1	1642	-0.853034	0.686258	0.526078	0.468261	0.619506	-1.76646	0.686258	2.15216	0.142369	0.280847	1.06402	0	1.07541	3.32598	0.821545	0.516822	1.55405	0	2.88809	2.24295	3.29102	1.48299	0.51744	0	0.500811	1.80053	0.397402	0.309946	0.769084	0	2.62744	1.75998	2.99807	1.08938	0.488193	0	0.438108	1.44648	0.384718	0.262045	0.693761	0	2.99678	2.07079	3.15979	1.29727	PL06019B1H05	0.0127177
dd_Smed_v6_10943_0_1	918	-0.28211	2.84938	0.415284	0.5193	0.66493	-0.160148	2.84938	0.134601	0.713708	0.83714	7.57582	5.8463	7.27484	5.18852	8.21545	8.08121	8.32526	3.54366	5.57701	6.48767	11.7304	7.68457	6.58977	5.87558	6.05973	5.02408	7.10821	8.66868	7.3695	3.49269	9.07514	9.10556	19.1141	10.097	6.2173	4.85903	5.30103	4.03616	6.88133	7.32896	6.64774	2.85903	10.3508	10.7136	20.1451	12.0238	NA	NA
dd_Smed_v6_10945_0_1	4025	-3.76934	1.99418	8.90676	0.00284117	0.00940563	-3.0748	1.99418	6.33554	0.0118342	0.0369776	2.08548	0	0.759114	0	0.593338	2.81903	1.22104	0	11.6188	9.21298	6.28878	12.0324	0.413736	0	0.144216	0	0.117087	0.689688	0.246516	0	4.3121	2.94913	2.33714	3.60579	0.39035	0	0.12616	0	0.11335	0.583099	0.222373	0	4.91825	3.46996	2.46321	4.29391	NA	NA
dd_Smed_v6_10946_0_1	3104	-3.84788	0.791246	7.69468	0.00553838	0.0170021	-2.51197	0.791246	3.74961	0.0528197	0.129159	0.212804	0	0.885633	0	0.730262	1.69142	0	0.337491	5.07906	3.44884	4.62698	2.62893	0.0547446	0	0.218175	0	0.186865	0.536596	0	0.0983765	2.44431	1.43157	2.22977	1.02158	0.0516503	0	0.190858	0	0.180901	0.453667	0	0.0805287	2.7879	1.68438	2.35005	1.21653	Contig4248	-0.0572842
dd_Smed_v6_10947_0_1	1561	-9.09653	-0.0111966	26.1258	3.2e-07	2.32e-06	-9.09653	-0.0111966	27.2035	1.83e-07	1.63e-06	0	0	0	0	0	0	0	0	3.58522	2.9906	1.75956	2.3593	0	0	0	0	0	0	0	0	3.4309	2.4684	1.68611	1.82303	0	0	0	0	0	0	0	0	3.91317	2.90433	1.77705	2.17093	Contig4152	-0.0730524
dd_Smed_v6_10948_0_1	494	-2.57193	0.819558	2.37896	0.122979	0.230581	-2.39123	0.819558	2.09155	0.148116	0.28979	0	1.59445	0.885633	0	0	2.77204	0.0370011	0	2.02498	5.23355	4.62698	2.89857	0	2.9778	1.37088	0	0	5.52576	0.0608655	0	6.12336	13.6499	14.0105	7.07733	0	2.4626	1.19924	0	0	4.67177	0.0549044	0	6.98411	16.0605	14.7663	8.42795	NA	NA
dd_Smed_v6_10949_0_1	1306	0.0490482	2.66254	0.00846643	0.926688	0.956167	0.356888	2.66254	0.44882	0.502896	0.680544	8.6824	2.65741	3.16297	8.86927	2.96669	11.746	6.99322	7.29824	5.11226	6.29473	6.71238	4.51637	5.3086	1.87727	1.85193	6.0367	1.80427	8.85654	4.35127	5.05622	5.84742	6.21004	7.68808	4.17119	5.00854	1.55248	1.62006	4.84967	1.74668	7.48779	3.92512	4.1389	6.66939	7.30674	8.10278	4.9672	NA	NA
dd_Smed_v6_1095_0_1	1301	-1.04939	6.87807	15.3193	9.08e-05	0.000413928	-0.708182	6.87807	7.0674	0.00784992	0.0261055	89.1223	91.7338	81.3517	63.0605	130.352	101.109	109.967	70.62	163.559	155.921	159.24	194.474	54.7006	65.0525	47.8148	43.0859	79.5814	76.5301	68.6862	49.1135	187.798	154.415	183.088	180.3	51.6088	53.7976	41.8281	34.6137	77.0413	64.7026	61.9592	40.2032	214.197	181.684	192.963	214.708	Contig4870	-1.24529
dd_Smed_v6_10951_0_1	1763	0.204941	1.85571	0.111304	0.738665	0.833671	0.251674	1.85571	0.168408	0.681531	0.815057	3.02182	5.20852	3.73231	2.70513	1.64309	6.62472	3.92212	2.95305	2.95449	4.02766	4.13822	1.5841	1.36867	2.72568	1.61882	1.36392	0.740254	3.70027	1.8078	1.51554	2.50337	2.94348	3.51112	1.08379	1.29131	2.2541	1.41614	1.09573	0.716627	3.12841	1.63075	1.24059	2.85526	3.4633	3.70051	1.29061	PL06013B1E10	0.172935
dd_Smed_v6_10952_0_1	714	-0.380027	2.05533	0.425747	0.514083	0.66044	-0.0523548	2.05533	0.00814893	0.928072	0.96213	4.3412	2.71056	1.83452	4.83375	6.43543	3.38283	4.03313	3.4171	2.48974	3.2559	7.918	4.24674	4.85506	3.50245	1.96471	6.01785	7.15899	4.66553	4.59014	4.33022	5.20894	5.87533	16.5883	7.17415	4.58064	2.89649	1.71872	4.83452	6.93049	3.94449	4.14059	3.54462	5.94116	6.91293	17.4831	8.54324	Contig1251	0.19282
dd_Smed_v6_10954_0_1	2110	-0.00737508	2.65388	9.09e-05	0.992392	0.996641	-0.124522	2.65388	0.0259268	0.872079	0.932113	4.80937	0	10.1215	10.5544	7.75903	4.88632	6.2902	4.55613	4.84668	6.53591	6.71238	7.51605	1.82007	0	3.66805	4.44639	2.92077	2.28044	2.4225	1.95373	3.43129	3.99102	4.75859	4.29656	1.7172	0	3.2088	3.57207	2.82754	1.928	2.18525	1.59928	3.91362	4.69584	5.01527	5.1165	NA	NA
dd_Smed_v6_10955_0_1	1614	0.353754	1.74973	0.183358	0.668503	0.783359	0.846791	1.74973	1.04372	0.306959	0.495845	3.53254	0	4.61794	4.2129	4.47285	4.36949	4.81015	3.75459	1.82581	3.18354	1.79214	2.86486	1.7477	0	2.18785	2.32024	2.20117	2.66592	2.4218	2.10479	1.68984	2.54137	1.66094	2.14099	1.64892	0	1.91392	1.864	2.13091	2.25391	2.18461	1.72293	1.92738	2.99018	1.75053	2.54956	NA	NA
dd_Smed_v6_10956_0_1	371	-3.09471	0.186393	4.05779	0.0439681	0.0996559	-1.16132	0.186393	0.66874	0.413491	0.602242	0	0	0.948892	0	1.09539	0.0469838	2.14607	0.295305	2.92129	1.18177	1.72697	2.22448	0	0	1.95576	0	2.34514	0.124708	4.70059	0.72019	11.7624	4.10411	6.96299	7.23216	0	0	1.71089	0	2.27028	0.105435	4.24022	0.589531	13.4158	4.8289	7.33858	8.61232	Contig1057	-0.293277
dd_Smed_v6_10959_0_1	1608	3.3479	3.73687	66.0602	4.37e-16	8.91e-15	3.27055	3.73687	63.4749	1.62e-15	3.63e-14	21.0676	17.4326	21.698	17.6055	21.2232	17.1491	10.9523	24.4259	3.05408	1.06118	2.0854	1.44928	10.4619	10.002	10.3183	9.73234	10.4833	10.502	5.53482	13.7441	2.83719	0.850283	1.93994	1.08713	9.8706	8.27156	9.02637	7.81862	10.1487	8.87899	4.99275	11.2506	3.23601	1.00044	2.04458	1.29459	NA	NA
dd_Smed_v6_1096_0_1	733	-0.315512	6.84896	1.79318	0.18054	0.310252	-0.285055	6.84896	1.46539	0.226074	0.399907	104.104	117.298	107.351	94.5464	101.598	115.58	110.633	104.496	122.229	122.952	145.685	135.896	113.408	147.638	111.989	114.656	110.091	155.274	122.649	128.987	249.096	216.119	297.3	223.622	106.998	122.095	97.9677	92.1104	106.577	131.277	110.637	105.586	284.111	254.286	313.336	266.297	Contig1678	-1.59106
dd_Smed_v6_10962_0_1	8267	-1.79316	1.93444	5.17113	0.0229652	0.0577406	-0.347997	1.93444	0.209069	0.647498	0.791949	1.70243	0	2.21408	2.30601	6.48107	2.53713	4.58814	3.37491	3.55202	7.09062	5.34384	5.62861	0.164439	0	0.204795	0.247952	0.622689	0.302213	0.450995	0.369373	0.641834	1.10509	0.966918	0.821234	0.155145	0	0.179153	0.199196	0.602814	0.255507	0.406825	0.30236	0.732056	1.30025	1.01907	0.977955	NA	NA
dd_Smed_v6_10965_0_1	3466	-1.99748	3.57474	22.1114	2.57e-06	1.59e-05	-2.68063	3.57474	37.7008	8.25e-10	1.02e-08	7.74606	4.305	5.18728	7.98234	4.70106	3.99362	5.58717	1.43434	18.6564	28.5554	20.1697	33.5358	1.78458	1.14593	1.14441	2.04718	1.07731	1.13464	1.30992	0.374432	8.04071	10.615	8.70474	11.6706	1.68371	0.947668	1.00113	1.64463	1.04292	0.959284	1.18163	0.306502	9.17099	12.4896	9.17428	13.8978	NA	NA
dd_Smed_v6_10966_0_1	2455	-1.15928	1.29664	1.71091	0.190867	0.323973	-0.966028	1.29664	1.20048	0.273226	0.457851	3.06438	0	1.01215	2.3947	1.55181	2.44316	1.36904	2.06713	3.88399	3.54531	4.26855	2.83116	0.996721	0	0.315258	0.867072	0.502063	0.979984	0.453156	0.761847	2.36331	1.86064	2.60084	1.391	0.940385	0	0.275787	0.696575	0.486038	0.828531	0.408775	0.62363	2.69552	2.18923	2.74113	1.65645	PL06012A1H03	0.0808915
dd_Smed_v6_10967_0_1	2704	-0.863952	2.97383	4.28497	0.0384509	0.0891366	-0.808248	2.97383	3.77595	0.0519944	0.127651	2.80901	8.50371	5.81987	7.05107	6.16158	4.69838	7.36323	6.87638	10.0917	11.89	9.97082	12.0324	0.829526	2.90144	1.64581	2.31795	1.80991	1.71104	2.21281	2.30093	5.57511	5.66549	5.5158	5.36735	0.78264	2.39946	1.43975	1.86216	1.75214	1.44661	1.99609	1.88349	6.3588	6.66602	5.81333	6.39163	NA	NA
dd_Smed_v6_10968_0_1	1657	-1.20183	0.708959	0.701399	0.402314	0.560246	-1.62337	0.708959	1.25385	0.262818	0.44564	1.31938	0	3.28949	0	0.136924	2.25522	1.03603	0	2.22416	1.85707	4.56181	1.95485	0.635817	0	1.51803	0	0.0656341	1.34025	0.508082	0	2.00511	1.44399	4.11812	1.423	0.599879	0	1.32796	0	0.0635392	1.13312	0.458321	0	2.28697	1.69901	4.34026	1.69456	NA	NA
dd_Smed_v6_10969_0_1	12190	-3.54883	2.61731	11.6649	0.000636918	0.00244065	-3.02599	2.61731	8.9215	0.00281833	0.0106752	3.02182	0	2.08756	0	2.23643	0.516822	0.925029	3.67021	11.8511	14.9771	16.5529	16.6162	0.197946	0	0.130951	0	0.145721	0.04175	0.0616644	0.27242	1.45228	1.58301	2.03121	1.64415	0.186758	0	0.114555	0	0.14107	0.0352976	0.055625	0.222996	1.65643	1.86258	2.14077	1.95791	NA	NA
dd_Smed_v6_1097_0_1	4427	0.314773	3.80679	0.768101	0.380805	0.537935	0.341286	3.80679	0.905171	0.341399	0.532805	12.8959	17.22	19.9267	9.17969	16.1114	13.6723	10.0643	20.4182	16.2331	12.3242	8.17868	10.8191	2.32609	3.58869	3.44191	1.84321	2.89065	3.04124	1.84738	4.1731	5.47754	3.58681	2.76349	2.94777	2.19461	2.9678	3.01097	1.48077	2.79839	2.57123	1.66645	3.416	6.24752	4.22025	2.91255	3.51031	PL08009B2F03	0.296559
dd_Smed_v6_10970_0_1	880	-0.0938674	2.87836	0.0389228	0.843602	0.90226	-0.460822	2.87836	0.933396	0.333982	0.52426	5.3201	6.48408	8.35025	10.5544	4.60978	9.91358	7.17822	2.10932	6.5397	7.42827	8.83037	9.97646	4.82748	6.79795	7.25587	10.6612	4.16073	11.0935	6.62853	2.16875	11.1012	10.8759	15.01	13.6744	4.55462	5.62182	6.34741	8.56485	4.02793	9.379	5.97934	1.77529	12.6617	12.7966	15.8196	16.2839	Contig3350	-0.636961
dd_Smed_v6_10973_0_1	842	7.29001	5.96922	106.878	4.73e-25	1.82e-23	4.09689	5.96922	44.887	2.09e-11	3.13e-10	130.917	160.614	212.742	168.96	15.7006	22.2233	13.3574	22.3166	2.62252	0.144706	0.195506	1.34817	124.156	175.988	193.203	178.372	14.8107	25.9906	12.8912	23.981	4.65266	0.22143	0.347323	1.93128	117.138	145.54	169.013	143.297	14.338	21.9738	11.6286	19.6303	5.30668	0.260535	0.366057	2.29984	NA	NA
dd_Smed_v6_10974_0_1	2096	-0.547426	3.12013	2.09807	0.147486	0.264976	-0.296399	3.12013	0.622392	0.43016	0.616606	6.17131	8.18482	8.47677	5.49895	10.5888	5.45012	7.21522	10.42	10.3573	9.52651	9.44947	12.0324	2.35109	3.60272	3.09251	2.33208	4.01261	2.56055	2.79731	4.4981	7.38159	5.85602	6.74374	6.92429	2.2182	2.9794	2.70532	1.87351	3.88454	2.16483	2.52335	3.68204	8.41921	6.89021	7.1075	8.24569	NA	NA
dd_Smed_v6_10976_0_1	1035	0.413299	1.6681	0.2589	0.610877	0.740619	0.612312	1.6681	0.567918	0.451087	0.634828	2.08548	0.903519	4.17512	5.67633	0.31949	6.01393	5.95719	2.44681	1.99179	2.29119	4.07305	1.28076	1.60897	0.805395	3.08462	4.87509	0.245182	5.72185	4.67717	2.139	2.87473	2.8522	5.88659	1.49259	1.51803	0.666052	2.69841	3.91647	0.237356	4.83756	4.2191	1.75093	3.27883	3.35591	6.20411	1.77743	NA	NA
dd_Smed_v6_10977_0_1	3892	-0.532343	1.36416	0.321971	0.570426	0.706631	-0.382697	1.36416	0.167305	0.682518	0.815941	1.74499	0	3.47927	3.19294	2.14514	5.26219	0.925029	1.01247	2.62252	3.8106	2.63933	3.10079	0.358017	0	0.683578	0.729244	0.43778	1.33141	0.193137	0.235376	1.00656	1.26148	1.01439	0.960978	0.337781	0	0.597991	0.585848	0.423807	1.12565	0.174221	0.192673	1.14805	1.48426	1.06911	1.14437	PL06017B1E11	0.11707
dd_Smed_v6_1098_0_1	3158	0.713585	8.47855	6.70647	0.00960637	0.0272665	0.640713	8.47855	5.4176	0.0199347	0.0580498	351.041	372.994	452.685	494.595	434.688	332.41	331.974	489.91	237.587	259.965	219.749	301.855	88.7625	108.969	109.612	139.217	109.33	103.653	85.423	140.364	112.384	106.063	104.088	115.292	83.7454	90.1158	95.8878	111.842	105.84	87.6337	77.0568	114.899	128.182	124.794	109.702	137.294	Contig4393	0.163485
dd_Smed_v6_10980_0_1	1198	-7.27104	1.1754	24.8296	6.26e-07	4.36e-06	-4.21612	1.1754	11.959	0.00054385	0.00244574	0.127682	0	0	0	0.0456414	0.0469838	1.14704	0.0421864	6.27413	4.7512	7.68991	5.76343	0.0851054	0	0	0	0.0302603	0.0386198	0.778042	0.0318615	7.82333	5.10983	9.60172	5.8028	0.0802951	0	0	0	0.0292945	0.0326513	0.701841	0.0260811	8.92305	6.01223	10.1196	6.91018	NA	NA
dd_Smed_v6_10981_0_1	2031	3.49939	1.87502	14.1423	0.000169488	0.00073309	3.87322	1.87502	16.7978	4.16e-05	0.000234825	6.63948	0.212593	4.87098	6.38587	5.34004	6.76567	6.69721	4.68269	0.0331965	0.434119	0.912363	0.202226	2.6104	0.0965719	1.83391	2.7949	2.08837	3.28035	2.67958	2.0861	0.0244161	0.275397	0.671958	0.120099	2.46286	0.0798638	1.6043	2.24532	2.02171	2.77338	2.41714	1.70764	0.0278483	0.324033	0.708203	0.143018	NA	NA
dd_Smed_v6_10983_0_1	3735	0.224659	1.14503	0.0932229	0.760119	0.849276	-0.511476	1.14503	0.477866	0.48939	0.668336	4.46888	1.80704	2.27734	1.86255	1.55181	2.0203	0.999031	1.68746	2.29056	2.94236	0.684272	2.99968	0.955414	0.446364	0.466241	0.443273	0.330004	0.532654	0.217356	0.408783	0.916105	1.015	0.274045	0.968719	0.901412	0.369137	0.407865	0.35611	0.319471	0.450334	0.196068	0.33462	1.04488	1.19425	0.288828	1.15359	NA	NA
dd_Smed_v6_10984_0_1	1955	-0.482834	2.17555	0.578741	0.446806	0.600711	0.0311318	2.17555	0.00243545	0.96064	0.980942	3.83047	1.38185	5.56683	3.14859	1.64309	8.59804	7.43723	2.19369	5.01267	5.88473	5.27867	3.26931	1.56455	0.652119	2.17738	1.43161	0.667554	4.33083	3.09134	1.01527	3.83016	3.87829	4.03889	2.01708	1.47612	0.539295	1.90476	1.1501	0.646247	3.66152	2.78858	0.831072	4.36856	4.5632	4.25675	2.40201	Contig6662	0.0135829
dd_Smed_v6_10986_0_1	3430	-1.44114	1.29987	2.19947	0.138058	0.2523	-1.64216	1.29987	2.83173	0.0924189	0.203387	0.383047	4.19871	1.64475	0	1.68873	1.31555	1.59105	0.801541	4.44833	5.04061	4.46406	2.93227	0.0891746	1.12936	0.366672	0	0.391055	0.377686	0.37694	0.211438	1.9373	1.89343	1.9468	1.03115	0.0841343	0.93397	0.320763	0	0.378574	0.319316	0.340023	0.173078	2.20963	2.22781	2.05181	1.22793	NA	NA
dd_Smed_v6_10987_0_1	4435	-4.41947	0.34931	8.36102	0.00383356	0.0122943	-3.86804	0.34931	6.81427	0.00904324	0.0294696	0.425608	0	0	0.133039	0.136924	0	0.703022	0	2.09138	4.65472	3.22585	2.69634	0.0766301	0	0	0.0266649	0.0245221	0	0.128812	0	0.704423	1.35226	1.08802	0.733322	0.0722988	0	0	0.0214217	0.0237394	0	0.116197	0	0.803443	1.59107	1.1467	0.873266	NA	NA
dd_Smed_v6_10988_0_1	1693	-1.34571	1.43463	1.7677	0.183667	0.314312	-0.852733	1.43463	0.728008	0.39353	0.583523	1.14914	0	2.84668	2.35036	3.51439	3.52379	1.81306	0.0843728	4.58111	4.63061	3.35619	3.57265	0.542	0	1.28574	1.23405	1.64879	2.04961	0.870236	0.0450916	4.04212	3.52404	2.96534	2.54535	0.511365	0	1.12476	0.99139	1.59616	1.73285	0.785006	0.036911	4.61031	4.1464	3.12529	3.03109	NA	NA
dd_Smed_v6_10989_0_1	1960	-0.353867	2.22389	0.373008	0.541369	0.683132	-0.272735	2.22389	0.222414	0.637207	0.784328	8.21423	1.70074	2.97319	3.59205	4.01644	4.6514	6.14219	2.65774	3.38604	7.21121	6.15845	4.34785	3.34652	0.800561	1.15995	1.62908	1.62764	2.33693	2.54654	1.2269	2.58066	4.74037	4.70002	2.67567	3.15737	0.662054	1.01472	1.30874	1.57568	1.97577	2.29713	1.00431	2.94342	5.57753	4.95354	3.18628	NA	NA
dd_Smed_v6_1099_0_1	1614	0.222825	8.00887	0.760414	0.383199	0.540271	0.0887499	8.00887	0.120741	0.728232	0.846718	255.577	301.35	239.058	320.269	243.314	273.117	229.074	271.722	258.866	228.829	274.393	194.44	126.445	172.258	113.259	176.387	119.739	166.634	115.333	152.326	239.589	182.67	254.304	145.31	119.298	142.456	99.0783	141.703	115.917	140.881	104.038	124.69	273.267	214.93	268.022	173.04	Contig5534	-0.465153
dd_Smed_v6_10990_0_1	2298	1.22241	0.146091	1.18708	0.275919	0.426458	1.79665	0.146091	2.50177	0.113718	0.23727	2.80901	0.425185	0.189778	0.798234	0.593338	1.59745	0.592018	3.54366	0.464751	0.0482355	0.391013	0.910015	0.976083	0.170703	0.0631494	0.30877	0.20508	0.684535	0.209348	1.39525	0.30211	0.0270444	0.254522	0.477652	0.920913	0.141169	0.0552429	0.248055	0.198535	0.578743	0.188844	1.14212	0.344577	0.0318205	0.268251	0.568806	NA	NA
dd_Smed_v6_10991_0_1	3842	-3.13362	4.25279	47.7457	4.85e-12	6.59e-11	-3.45724	4.25279	56.4871	5.66e-14	1.1e-12	8.17167	2.55111	8.41351	2.3947	5.20312	5.45012	2.33107	4.21864	40.7653	55.1573	35.9732	56.9602	1.69839	0.61261	1.67453	0.55405	1.07567	1.39691	0.493039	0.993495	15.8499	18.4972	14.0057	17.8825	1.60239	0.506621	1.46487	0.445104	1.04133	1.18102	0.444751	0.813252	18.078	21.7638	14.7612	21.2951	NA	NA
dd_Smed_v6_10994_0_1	1751	0.475664	2.94969	0.8172	0.366	0.522471	-0.428889	2.94969	0.661737	0.415947	0.603719	6.5118	21.6313	8.41351	4.2129	4.24465	8.83296	6.06819	2.61556	9.72657	5.18532	7.85283	6.53863	2.9696	11.3975	3.67421	2.1387	1.92543	4.96751	2.81615	1.35154	8.2979	3.81548	6.70849	4.50416	2.80175	9.42558	3.21418	1.71816	1.86397	4.1998	2.54034	1.10634	9.46433	4.4893	7.07035	5.36372	PL06015B2F11	-0.567367
dd_Smed_v6_10996_0_1	1930	-0.218191	2.55599	0.205335	0.650449	0.770589	-0.441712	2.55599	0.840192	0.359342	0.550217	3.91559	7.91908	6.45247	4.7894	2.82976	6.57773	6.4012	3.92333	5.84258	7.71768	8.7652	4.48267	1.62003	3.78555	2.55647	2.20587	1.16457	3.35612	2.69517	1.83928	4.52212	5.15216	6.79342	2.80151	1.52846	3.13061	2.23639	1.77212	1.1274	2.83745	2.43121	1.50559	5.15779	6.06204	7.15987	3.33614	Contig7681	0.105192
dd_Smed_v6_10997_0_1	3633	0.68617	2.82316	1.36827	0.24211	0.388179	0.383065	2.82316	0.428965	0.512497	0.689206	13.6194	6.43093	7.08506	7.40584	7.62211	2.0203	11.4704	6.87638	4.78029	8.77886	6.64721	1.24706	2.99349	1.63313	1.49125	1.81202	1.66641	0.547608	2.56563	1.71256	1.96555	3.11339	2.7369	0.414033	2.82429	1.35058	1.30454	1.45572	1.61322	0.462977	2.31436	1.40186	2.24184	3.66322	2.88453	0.493045	Contig5274	0.023081
dd_Smed_v6_10998_0_1	1412	-2.03313	1.22992	2.04887	0.152319	0.271525	-3.75686	1.22992	6.03587	0.014018	0.0428534	0	4.94278	0.0632595	0	0.730262	0	0.222007	0.548423	6.10815	6.07767	3.45394	4.88712	0	3.2296	0.0342581	0	0.410786	0	0.127766	0.351424	6.46204	5.54578	3.65902	4.17476	0	2.67084	0.0299689	0	0.397675	0	0.115253	0.287668	7.37041	6.52518	3.85639	4.97146	NA	NA
dd_Smed_v6_10999_0_1	415	0.425862	3.71056	1.77464	0.182809	0.313292	0.589885	3.71056	3.41103	0.0647619	0.152288	16.6838	10.3639	16.1312	11.3527	13.4642	13.8602	17.4645	16.2839	12.2163	9.86416	9.84048	8.662	32.1019	23.0402	29.7228	24.3167	25.7694	32.8883	34.1973	35.5028	43.973	30.6247	35.4693	25.1758	30.2874	19.054	26.0014	19.5352	24.9469	27.8055	30.8481	29.0617	50.1543	36.0331	37.3825	29.9802	NA	NA
dd_Smed_v6_11_0_1	810	3.62688	11.696	98.7712	2.83e-23	9.77e-22	3.52801	11.696	94.3122	2.69e-22	1e-20	6625.27	4240.43	3930.82	4964.4	3921.1	5479.25	5899.17	3152.63	339.434	448.204	471.007	340.919	6531.33	4829.88	3710.82	5447.99	3844.98	6661.24	5918.18	3521.59	625.986	712.937	869.815	507.667	6162.16	3994.26	3246.21	4376.72	3722.26	5631.77	5338.56	2882.69	713.981	838.843	916.733	604.548	Contig1963	2.84316
dd_Smed_v6_110_0_1	449	-0.146612	9.52443	0.271448	0.602362	0.733602	-0.0560386	9.52443	0.0396761	0.842115	0.915391	687.74	596.429	837.366	664.441	849.934	596.365	779.984	740.16	682.353	675.128	733.116	993.366	1223.1	1225.53	1426.07	1315.42	1503.52	1307.93	1411.63	1491.52	2270.17	1937.31	2442.37	2668.56	1153.97	1013.5	1247.52	1056.76	1455.54	1105.8	1273.38	1220.93	2589.28	2279.45	2574.11	3177.81	Contig7435	-1.00471
dd_Smed_v6_1100_0_1	1427	0.794157	6.86446	10.3458	0.00129771	0.00468317	0.484365	6.86446	3.87733	0.0489423	0.121555	142.621	166.354	118.042	159.248	121.269	133.387	101.938	116.434	82.8584	93.4321	87.8475	73.9472	79.8074	107.553	63.2537	99.1983	67.4991	92.0468	58.0491	73.8258	86.7376	84.3592	92.0852	62.5044	75.2965	88.9447	55.3341	79.6924	65.3447	77.8212	52.3639	60.4321	98.9302	99.2572	97.0523	74.4325	Contig4537	-0.136979
dd_Smed_v6_11000_0_1	870	-7.89666	1.31513	29.0132	7.19e-08	5.8e-07	-4.16258	1.31513	12.5397	0.000398395	0.00183948	0.0851216	0	0	0	0	1.12761	0.0370011	0.337491	3.7844	6.19826	8.17868	8.89793	0.0781274	0	0	0	0	1.27632	0.0345604	0.350989	6.49789	9.17932	14.062	12.3362	0.0737115	0	0	0	0	1.07907	0.0311756	0.287312	7.41129	10.8004	14.8206	14.6904	Contig3242	-0.134581
dd_Smed_v6_11002_0_1	1815	1.28215	0.0246329	1.70707	0.191366	0.324318	-0.582699	0.0246329	0.351984	0.552992	0.721393	1.48963	2.65741	1.77127	0.84258	0.547696	0.422854	0.740023	0.126559	0.165982	1.15765	0.391013	1.04483	0.655366	1.35081	0.746242	0.412658	0.239682	0.229421	0.331323	0.063091	0.136609	0.821791	0.322254	0.694358	0.618324	1.1171	0.652809	0.331514	0.232032	0.193965	0.298873	0.0516448	0.155812	0.966921	0.339637	0.826866	PL06021A2C11	-0.0715851
dd_Smed_v6_11003_0_1	469	-0.349561	2.33792	0.332784	0.564024	0.701545	-0.429858	2.33792	0.503046	0.478165	0.65899	2.55365	1.22241	3.60579	11.1309	3.78823	5.87298	3.3671	4.51394	5.87578	6.6565	6.74497	4.34785	4.34782	2.40467	5.87896	21.0967	6.41558	12.3312	5.834	8.70831	18.7149	18.2866	21.5125	11.1819	4.10207	1.98863	5.14289	16.9483	6.21081	10.4254	5.26263	7.12842	21.3456	21.5161	22.6729	13.3158	NA	NA
dd_Smed_v6_11004_0_1	3017	-0.644817	2.49314	1.39463	0.237624	0.382903	0.514858	2.49314	0.904648	0.341539	0.53289	5.14985	3.82667	3.16297	1.72951	5.06619	13.0615	5.43917	7.46699	8.29912	6.94591	3.5517	2.89857	1.36302	1.17019	0.801665	0.509568	1.33376	4.26321	1.46501	2.23935	4.10914	2.96629	1.76094	1.15883	1.28598	0.967736	0.701293	0.409369	1.29119	3.60434	1.32153	1.83308	4.68676	3.49015	1.85593	1.37998	NA	NA
dd_Smed_v6_11005_0_1	938	-0.511358	3.24842	1.72513	0.189034	0.321735	-0.610706	3.24842	2.45987	0.116789	0.241939	5.49034	10.9485	7.14832	10.0666	6.75492	10.1955	5.36517	9.11226	14.6064	8.77886	13.718	10.8865	4.6739	10.7687	5.82739	9.53973	5.71991	10.7035	4.64797	8.7897	23.2614	12.0586	21.8763	13.999	4.40972	8.90562	5.09777	7.66388	5.53735	9.04927	4.19275	7.19504	26.5313	14.1881	23.0563	16.6705	NA	NA
dd_Smed_v6_11006_0_1	2851	0.321124	1.45066	0.265277	0.606518	0.737188	-0.0880254	1.45066	0.019913	0.88778	0.941672	4.1284	1.86019	3.16297	3.32598	2.37335	2.53713	1.96106	2.53118	3.58522	2.41177	2.41124	1.5841	1.15629	0.601965	0.848342	1.037	0.661206	0.876322	0.558955	0.803299	1.87851	1.08993	1.26511	0.670191	1.09094	0.497818	0.742126	0.833085	0.640102	0.740889	0.504211	0.657561	2.14257	1.28242	1.33335	0.798088	NA	NA
dd_Smed_v6_11007_0_1	3195	0.650295	0.23549	0.176803	0.674135	0.787991	0.477713	0.23549	0.0958864	0.756823	0.864264	0	4.94278	0.316297	0	2.69284	0	0.407013	1.5609	0.663929	1.18177	0.684272	0.808903	0	1.42729	0.0757003	0	0.66944	0	0.103519	0.442032	0.310417	0.476565	0.320363	0.305379	0	1.18035	0.0662223	0	0.648073	0	0.0933804	0.361837	0.354052	0.560727	0.337643	0.363656	NA	NA
dd_Smed_v6_11008_0_1	1190	-1.19224	1.06231	0.893467	0.34454	0.500871	-1.32436	1.06231	1.09733	0.294854	0.482272	0	4.35815	0.569335	0.798234	2.41899	0	0.185006	2.61556	4.78029	3.76237	1.88989	2.66264	0	3.37884	0.365842	0.596264	1.61458	0	0.126334	1.98869	6.0007	4.07356	2.37561	2.69885	0	2.79426	0.320037	0.479017	1.56305	0	0.113961	1.6279	6.84422	4.79296	2.50375	3.21389	Contig2838	-0.119375
dd_Smed_v6_1101_0_1	722	0.56382	7.58805	4.47665	0.0343609	0.0811358	0.492158	7.58805	3.41684	0.0645344	0.151813	229.743	159.657	286.565	202.308	196.577	175.25	231.96	231.856	136.139	135.783	160.902	161.309	254.091	204.016	303.5	249.076	216.256	239.022	261.071	290.558	281.669	242.308	333.356	269.484	239.729	168.718	265.501	200.098	209.354	202.082	235.502	237.844	321.263	285.1	351.337	320.912	Contig1036	-0.1528
dd_Smed_v6_11010_0_1	1657	-2.29381	2.46479	8.70937	0.00316579	0.0103628	-1.91944	2.46479	6.29216	0.0121273	0.0377589	2.25572	4.5176	2.27734	0	3.65131	2.72506	1.59105	3.75459	7.5688	11.7936	11.6652	13.3469	1.08704	2.51534	1.05094	0	1.75024	1.61947	0.780268	2.05017	6.82337	9.17029	10.5306	9.71563	1.0256	2.08016	0.919359	0	1.69438	1.36919	0.70385	1.67822	7.78253	10.7898	11.0987	11.5697	Contig2454	-0.0120444
dd_Smed_v6_11011_0_1	1102	1.46018	1.79407	6.19004	0.0128471	0.0350415	1.28393	1.79407	4.82682	0.0280203	0.0768904	5.36266	5.20852	3.92209	3.6364	5.52261	4.6514	4.10713	1.77183	1.36106	1.56765	1.62922	2.02226	3.88581	4.36059	2.7215	2.93322	3.98047	4.15643	3.02858	1.45476	1.84497	1.83286	2.21148	2.21344	3.66618	3.60615	2.38076	2.35645	3.85342	3.51407	2.73197	1.19083	2.10431	2.15654	2.33076	2.63584	Contig1109	1.26512
dd_Smed_v6_11012_0_1	2381	-6.1927	-0.378284	12.0721	0.000511811	0.00199915	-1.01664	-0.378284	0.568369	0.450908	0.634711	0	0	0.0632595	0	0	1.26856	1.25804	0.126559	0.962698	2.38766	0.52135	1.51669	0	0	0.020316	0	0	0.524652	0.429356	0.0480933	0.603984	1.29203	0.327532	0.768336	0	0	0.0177724	0	0	0.443569	0.387305	0.0393681	0.688885	1.52021	0.3452	0.914963	NA	NA
dd_Smed_v6_11013_0_1	1214	-0.758373	1.61824	0.775009	0.378672	0.535728	0.082745	1.61824	0.00939425	0.922787	0.959833	3.06438	0	2.21408	2.70513	5.2944	5.12123	2.36807	1.5609	4.14956	3.2559	2.02023	4.11192	2.01561	0	1.39459	1.98072	3.46394	4.15408	1.58511	1.16334	5.10597	3.45551	2.48924	4.08545	1.90168	0	1.21998	1.59124	3.35337	3.51208	1.42987	0.952282	5.82371	4.06576	2.62351	4.8651	NA	NA
dd_Smed_v6_11015_0_1	308	-0.305101	1.82644	0.18667	0.665703	0.781751	-0.698371	1.82644	0.970301	0.324605	0.514526	0.425608	5.31482	3.22623	4.92244	3.83387	1.36253	3.58911	1.77183	6.27413	4.51002	3.03035	3.33672	1.10342	15.9202	8.00973	14.2064	9.88688	4.35627	9.46932	5.20501	30.4297	18.8663	14.7172	13.0672	1.04106	13.1659	7.00688	11.4129	9.57131	3.68302	8.54191	4.2607	34.7072	22.1982	15.5111	15.5609	NA	NA
dd_Smed_v6_11017_0_1	1193	-1.09975	0.782473	0.876961	0.349036	0.505271	0.0935974	0.782473	0.00655266	0.935483	0.966305	2.72389	0.0531482	0.822373	0	3.74259	1.50348	0.296009	2.74211	2.92129	2.77354	0.847194	1.21335	1.82319	0.0411017	0.52711	0	2.49175	1.24101	0.201626	2.07968	3.65787	2.9954	1.06225	1.22676	1.72014	0.0339906	0.461114	0	2.41222	1.04922	0.181879	1.70237	4.17206	3.52439	1.11955	1.46087	NA	NA
dd_Smed_v6_11018_0_1	1110	-0.777151	1.13962	1.21866	0.269624	0.418749	0.0969526	1.13962	0.019524	0.888875	0.942318	1.65987	0.744074	1.77127	1.41908	2.19079	4.18156	2.25707	1.64527	2.65572	2.74942	2.60675	1.5841	1.19408	0.618451	1.22021	1.13642	1.56765	3.70966	1.65236	1.34111	3.57399	3.19138	3.51286	1.72137	1.12659	0.511452	1.06743	0.912962	1.51761	3.13634	1.49053	1.0978	4.07639	3.75499	3.70235	2.04986	PL05003A1D08	0.120127
dd_Smed_v6_11019_0_1	3157	0.281229	2.78919	0.411034	0.521445	0.666573	0.593233	2.78919	1.83223	0.175864	0.330643	4.63912	9.30093	7.08506	5.76502	6.0703	13.2024	8.10325	5.86391	6.70569	5.49885	4.69215	5.12305	1.1734	2.71809	1.7161	1.62324	1.52724	4.11812	2.08577	1.6806	3.17295	2.24418	2.22322	1.95734	1.10707	2.24783	1.50123	1.30405	1.47849	3.48168	1.8815	1.3757	3.61897	2.6405	2.34314	2.33088	Contig6379	0.186187
dd_Smed_v6_1102_0_1	3525	0.264071	5.7455	0.849206	0.356777	0.513209	0.187658	5.7455	0.429421	0.512273	0.689102	46.9871	75.2578	54.0236	54.9008	67.1841	39.5134	48.0645	64.4608	47.2718	46.3302	34.3439	64.5437	10.6439	19.6972	11.7192	13.8444	15.1384	11.0383	11.0802	16.5458	20.0326	16.9342	14.5739	22.0855	10.0423	16.2894	10.2519	11.1221	14.6552	9.33241	9.99503	13.544	22.8486	19.9248	15.36	26.3002	Contig999	-0.0779876
dd_Smed_v6_11022_0_1	1647	0.270725	1.84891	0.206871	0.649231	0.769688	-0.662404	1.84891	1.21994	0.269372	0.453243	4.1284	6.37778	3.66905	3.81379	0.684621	2.67808	2.96009	3.07961	3.55202	4.14825	4.20338	2.99968	2.00157	3.57263	1.70346	2.05834	0.330163	1.60121	1.46048	1.69181	3.22164	3.24513	3.8176	2.19682	1.88844	2.95452	1.49018	1.6536	0.319625	1.35375	1.31744	1.38488	3.6745	3.81822	4.02352	2.61605	NA	NA
dd_Smed_v6_11023_0_1	2494	-1.81639	1.09288	2.36435	0.124136	0.232385	-1.4185	1.09288	1.47998	0.223778	0.396753	0.893776	1.11611	0.759114	1.41908	1.73437	3.80569	0	0	4.31554	4.58237	2.54158	3.37043	0.286164	0.41288	0.232746	0.505786	0.552354	1.50264	0	0	2.58484	2.3673	1.52438	1.63005	0.26999	0.341446	0.203606	0.40633	0.534724	1.27041	0	0	2.94819	2.78537	1.6066	1.94113	Contig5598	0.207363
dd_Smed_v6_11023_1_1	1982	-0.189283	1.5637	0.041272	0.839014	0.899907	-0.534366	1.5637	0.327186	0.567321	0.732703	3.40486	4.78334	1.64475	1.95124	5.8421	0.845708	2.59008	0	2.39015	4.7512	3.09552	3.20191	1.37176	2.22659	0.634553	0.875109	2.34119	0.420181	1.06192	0	1.80142	3.08858	2.33622	1.94858	1.29423	1.84136	0.555104	0.703031	2.26647	0.355243	0.957918	0	2.05465	3.63403	2.46224	2.32044	NA	NA
dd_Smed_v6_11024_0_1	3081	-1.80188	2.50542	9.89697	0.00165551	0.00583492	-0.841975	2.50542	2.29372	0.129898	0.262222	4.1284	1.70074	3.98535	0.620849	6.43543	6.85964	3.3301	3.67021	8.92985	8.77886	9.15621	9.50461	1.06997	0.509283	0.989116	0.179122	1.65904	2.19244	0.878312	1.07783	4.32959	3.67119	4.44538	3.72097	1.0095	0.421171	0.865274	0.1439	1.60609	1.85361	0.792291	0.882287	4.9382	4.31953	4.68516	4.43106	NA	NA
dd_Smed_v6_11025_0_1	1013	1.0717	3.93911	10.0955	0.00148635	0.00529554	0.898121	3.93911	7.13871	0.00754373	0.025202	16.3008	22.6411	21.8245	16.8073	12.3232	18.8405	13.8754	23.7087	7.86756	7.4765	13.4573	8.08903	12.8494	20.6206	16.4743	14.7483	9.6624	18.3148	11.1306	21.1763	11.6018	9.50931	19.8717	9.63164	12.1231	17.053	14.4117	11.8483	9.35399	15.4843	10.0405	17.3344	13.2327	11.1887	20.9436	11.4697	Contig2841	0.101414
dd_Smed_v6_11026_0_1	769	-4.99196	-0.158695	8.19865	0.00419216	0.0133223	-5.18743	-0.158695	8.74218	0.00310933	0.0116332	0.255365	0	0	0	0	0	0.222007	0	1.99179	2.53236	2.93259	1.61781	0.265166	0	0	0	0	0	0.234597	0	3.86911	4.24287	5.7044	2.53754	0.250178	0	0	0	0	0	0.211621	0	4.41299	4.99217	6.0121	3.0218	NA	NA
dd_Smed_v6_11027_0_1	1525	0.680668	2.11497	1.51781	0.217951	0.358009	0.126804	2.11497	0.052932	0.818038	0.901067	5.36266	4.35815	7.71765	4.74506	4.97491	4.79235	3.47811	1.8562	4.24915	2.12236	2.54158	4.92082	2.80798	2.6366	3.8698	2.76584	2.59112	3.09455	1.85334	1.1013	4.16224	1.79312	2.49298	3.89208	2.64926	2.18044	3.38528	2.22198	2.50842	2.6163	1.67183	0.901499	4.74732	2.10979	2.62745	4.63482	NA	NA
dd_Smed_v6_1103_0_1	1139	-0.857215	4.10782	2.37395	0.123374	0.231256	-1.02661	4.10782	3.38417	0.0658252	0.154324	28.0901	19.6648	3.66905	4.16856	13.2816	18.2297	12.6914	5.2733	28.217	33.9096	27.436	11.2235	19.6931	15.9286	2.46322	3.25325	9.26189	15.7607	9.05458	4.18899	37.0068	38.3582	36.0315	11.8855	18.58	13.1728	2.15481	2.61354	8.96628	13.3249	8.16779	3.42901	42.2088	45.1324	37.975	14.1537	Contig1463	-1.35006
dd_Smed_v6_11031_0_1	463	8.02419	-0.187425	23.2053	1.46e-06	9.44e-06	7.9028	-0.187425	22.685	1.91e-06	1.4e-05	1.31938	0.318889	1.70801	1.72951	0.410772	2.49014	1.55405	0.210932	0	0	0	0	2.27548	0.635434	2.82086	3.32045	0.70468	5.29617	2.72751	0.412204	0	0	0	0	2.14687	0.525497	2.46767	2.66753	0.682188	4.47767	2.46038	0.33742	0	0	0	0	Contig5461	1.0542
dd_Smed_v6_11032_0_1	1613	-0.831032	0.8665	0.794993	0.372595	0.529583	0.0899664	0.8665	0.00959034	0.921988	0.959743	1.10658	0.637778	2.6569	0.0886927	0.775903	1.22158	4.47714	1.98276	1.9254	1.61589	2.90001	1.51669	0.547812	0.364794	1.25954	0.0488775	0.382072	0.745772	2.25553	1.11221	1.78312	1.29074	2.68936	1.13417	0.516849	0.30168	1.10184	0.0392664	0.369877	0.630515	2.03463	0.910428	2.03377	1.51868	2.83443	1.35061	Contig5499	-0.207679
dd_Smed_v6_11034_0_1	1964	-3.07068	-0.206134	4.03297	0.0446194	0.100864	-8.7303	-0.206134	17.6146	2.7e-05	0.000158063	0.893776	0	0.0632595	0	0	0	0	0	2.12457	1.32648	3.22585	1.61781	0.363388	0	0.0246296	0	0	0	0	0	1.61594	0.870198	2.4569	0.993569	0.342849	0	0.0215458	0	0	0	0	0	1.84309	1.02388	2.58943	1.18318	NA	NA
dd_Smed_v6_11037_0_1	448	-10.4101	1.21727	51.3804	7.61e-13	1.12e-11	-8.76877	1.21727	47.7943	4.73e-12	7.66e-11	0	0	0	0	0	0	0.0370011	0	7.5024	8.17592	5.53934	5.39268	0	0	0	0	0	0	0.067115	0	25.016	23.5136	18.4954	14.5191	0	0	0	0	0	0	0.0605419	0	28.5324	27.6661	19.4931	17.2899	NA	NA
dd_Smed_v6_11039_0_1	1615	1.24623	1.70174	2.48111	0.115221	0.219131	1.38425	1.70174	3.05063	0.0807057	0.182376	3.66023	5.10223	3.98535	2.3947	2.6472	3.7587	9.43529	0.801541	0.298768	1.59177	3.09552	1.38188	1.80975	2.91474	1.88698	1.31806	1.30193	2.29184	4.74751	0.44906	0.276348	1.2699	2.86711	1.03207	1.70746	2.41045	1.65072	1.05888	1.26037	1.93764	4.28254	0.36759	0.315194	1.49416	3.02177	1.22903	NA	NA
dd_Smed_v6_1104_0_1	1418	-2.39229	5.79436	76.205	2.56e-18	6.31e-17	-2.2912	5.79436	70.6074	4.36e-17	1.13e-15	25.3662	19.2928	25.5568	20.5767	18.576	32.5128	22.4227	23.8775	119.242	119.286	136.757	101.382	14.2844	12.5525	13.7817	12.899	10.4052	22.5786	12.8497	15.2357	125.616	108.386	144.264	86.2382	13.477	10.3808	12.0562	10.3626	10.073	19.0892	11.5913	12.4716	143.274	127.528	152.045	102.696	Contig3763	-0.871997
dd_Smed_v6_11040_0_1	2105	-0.741005	2.61497	1.30479	0.25334	0.401143	-0.508468	2.61497	0.620235	0.43096	0.617486	4.89449	9.46038	4.11187	0.399117	8.07852	2.39617	6.73421	4.93581	10.2245	6.27061	7.98317	7.04419	1.85669	4.14637	1.49369	0.16854	3.04826	1.12095	2.59966	2.12157	7.2558	3.83812	5.67293	4.03638	1.75174	3.429	1.30667	0.135399	2.95096	0.947709	2.34506	1.73667	8.27574	4.51594	5.97894	4.80667	Contig3115	-0.2648
dd_Smed_v6_11041_0_1	2350	0.0672013	2.13464	0.0146321	0.90372	0.942164	-0.348503	2.13464	0.391679	0.531418	0.705122	2.85157	7.44074	2.72016	6.1198	3.05797	5.59107	2.62708	3.07961	5.6434	3.69002	5.6371	3.30302	0.968946	2.9212	0.885113	2.31486	1.03356	2.34286	0.908424	1.18571	3.5873	2.02311	3.58816	1.69534	0.914179	2.41579	0.774293	1.85967	1.00058	1.98078	0.819454	0.970593	4.09156	2.3804	3.78171	2.01887	NA	NA
dd_Smed_v6_11042_1_1	1472	-0.0572728	3.91242	0.0300543	0.862367	0.915046	-0.176325	3.91242	0.284969	0.593463	0.75183	19.7908	13.0745	11.8295	15.9647	15.3811	11.1352	11.8404	17.5495	18.6564	17.7265	17.1394	9.63942	10.7359	8.1946	6.14514	9.64068	8.29951	7.44916	6.53642	10.7872	18.9328	15.5159	17.4169	7.89872	10.1291	6.77684	5.37575	7.74498	8.03461	6.29792	5.89625	8.83015	21.5942	18.256	18.3564	9.40607	Contig5638	-0.102553
dd_Smed_v6_11045_0_1	209	0.0275376	2.73707	0.00233296	0.961477	0.978655	0.594047	2.73707	1.08475	0.297637	0.485322	5.91595	0.690926	8.16047	8.07103	12.1862	6.20186	8.10325	7.34043	4.08317	5.18532	7.03823	6.10047	22.6028	3.04998	29.8567	34.3272	46.3122	29.221	31.5062	31.778	29.184	31.9661	50.3734	35.2071	21.3252	2.5223	26.1185	27.5772	44.834	24.705	28.4205	26.0127	33.2864	37.6113	53.0906	41.9259	NA	NA
dd_Smed_v6_11046_0_1	1634	0.781184	1.62373	1.28231	0.25747	0.40558	-0.168213	1.62373	0.059676	0.807009	0.895518	5.19242	3.82667	2.6569	5.49895	2.55592	0.516822	3.40411	2.40462	4.14956	1.95354	1.30338	2.59523	2.53747	2.16063	1.24336	2.99146	1.24241	0.311464	1.69291	1.33151	3.79354	1.54039	1.19317	1.91574	2.39404	1.78682	1.08768	2.40323	1.20276	0.263328	1.52711	1.08995	4.32679	1.81242	1.25753	2.28133	NA	NA
dd_Smed_v6_11047_0_1	1931	4.43331	2.49642	33.0961	8.77e-09	8.16e-08	4.66088	2.49642	35.9156	2.06e-09	2.44e-08	7.87374	8.13167	8.72981	5.4546	4.56414	8.08121	10.2863	12.4028	0.199179	0.0482355	1.0427	0.101113	3.25598	3.88517	3.45697	2.51094	1.87736	4.1211	4.32873	5.8115	0.154083	0.0321843	0.807721	0.0631593	3.07195	3.21299	3.02414	2.0172	1.81744	3.4842	3.90478	4.75716	0.175743	0.0378682	0.85129	0.0752124	PL06016B1E11	0.589594
dd_Smed_v6_11048_0_1	2424	-1.44318	1.64853	2.43602	0.118577	0.224183	-1.29595	1.64853	1.98406	0.158963	0.306494	1.9578	0	2.90994	2.70513	3.78823	3.05395	0.33301	1.2234	6.44012	4.51002	5.89777	3.77488	0.644938	0	0.917959	0.991997	1.2413	1.24065	0.111637	0.456655	3.96877	2.39721	3.63948	1.87838	0.608485	0	0.803027	0.796935	1.20168	1.04891	0.100703	0.373807	4.52665	2.82056	3.8358	2.23684	Contig1929	0.119451
dd_Smed_v6_11049_0_1	847	-6.68516	0.564015	18.4297	1.76e-05	9.24e-05	-6.12967	0.564015	16.7253	4.32e-05	0.000243342	0.127682	0	0	0	0	0	0	0.210932	3.61842	2.70119	5.66968	4.21303	0.120373	0	0	0	0	0	0	0.225325	6.3816	4.10896	10.0129	5.99964	0.11357	0	0	0	0	0	0	0.184446	7.27866	4.83461	10.553	7.14458	NA	NA
dd_Smed_v6_11050_0_1	394	-8.50674	-0.534643	20.556	5.79e-06	3.35e-05	-8.50674	-0.534643	21.4508	3.63e-06	2.53e-05	0	0	0	0	0	0	0	0	1.29466	1.7606	1.95506	2.08966	0	0	0	0	0	0	0	0	4.90857	5.75736	7.42248	6.39726	0	0	0	0	0	0	0	0	5.59856	6.77412	7.82285	7.61808	NA	NA
dd_Smed_v6_11051_0_1	2118	-3.73523	0.380107	8.01617	0.00463615	0.0145556	-1.10033	0.380107	0.868858	0.351272	0.542094	0.127682	0	0.0632595	0.48781	0	2.25522	1.29504	0.843728	1.46064	2.24295	2.67192	3.06709	0.048138	0	0.0228387	0.204729	0	1.04853	0.496867	0.360435	1.03018	1.36444	1.88704	1.74668	0.0454171	0	0.0199792	0.164472	0	0.886486	0.448204	0.295044	1.17499	1.6054	1.98883	2.08001	NA	NA
dd_Smed_v6_11053_0_1	432	-10.4332	1.24595	43.5942	4.04e-11	4.96e-10	-6.95618	1.24595	32.0644	1.49e-08	1.56e-07	0	0	0	0	0	0	0.185006	0	6.6061	6.43944	4.5944	9.40349	0	0	0	0	0	0	0.348004	0	22.8431	19.2054	15.9085	26.2554	0	0	0	0	0	0	0.313921	0	26.0542	22.5972	16.7666	31.2659	NA	NA
dd_Smed_v6_11054_0_1	664	-1.00109	2.13699	3.40396	0.0650402	0.138068	-0.86176	2.13699	2.55082	0.110237	0.231987	3.83047	2.23222	3.35275	3.19294	3.10361	1.36253	5.10616	4.30301	5.44422	6.68062	6.97306	6.16788	4.60646	3.10157	3.86106	4.27442	3.71254	2.02068	6.24898	5.86348	12.2479	12.9631	15.7087	11.2042	4.34609	2.56496	3.37764	3.43392	3.59405	1.70839	5.63696	4.7997	13.9696	15.2524	16.556	13.3424	NA	NA
dd_Smed_v6_11057_0_1	400	-1.13672	2.77941	4.18923	0.0406816	0.0935727	-1.04534	2.77941	3.56818	0.0588968	0.14118	6.34156	8.45056	3.35275	0.931273	6.34415	4.83933	6.14219	2.99523	14.2081	9.81592	8.50452	9.4372	12.6596	19.4912	6.40935	2.06953	12.5975	11.9136	12.478	6.77519	53.0604	31.6178	31.8035	28.4575	11.944	16.119	5.60687	1.66259	12.1954	10.0724	11.2559	5.54601	60.519	37.2015	33.519	33.8882	NA	NA
dd_Smed_v6_1106_0_1	1859	-1.57647	1.02347	3.5968	0.0578909	0.125178	-0.435521	1.02347	0.290897	0.589646	0.7496	1.40451	0.531482	0.253038	1.55212	0.912827	3.4768	1.62805	2.32025	4.21595	1.83295	3.64945	1.5841	0.603292	0.263767	0.104083	0.742167	0.390015	1.8417	0.711658	1.12929	3.38775	1.27037	2.93652	1.02782	0.569192	0.218132	0.0910512	0.59623	0.377566	1.55707	0.641959	0.924412	3.86396	1.49472	3.09491	1.22396	Contig2943	-1.64577
dd_Smed_v6_11060_0_1	661	-2.24623	-0.164067	3.47749	0.062209	0.133026	0.0287014	-0.164067	0.000648737	0.97968	0.988712	0.212804	0	0.569335	0.133039	0.136924	2.44316	0.851026	1.01247	0.464751	1.0853	1.82473	0.977424	0.257076	0	0.658627	0.178909	0.164532	3.63973	1.04622	1.3859	1.0503	2.11548	4.12934	1.78359	0.242545	0	0.576164	0.143729	0.15928	3.07722	0.943757	1.13447	1.19794	2.48907	4.35208	2.12396	Contig7367	-0.426081
dd_Smed_v6_11061_0_1	1198	1.46807	0.964847	2.91567	0.0877229	0.175767	1.3029	0.964847	2.3162	0.128032	0.259343	4.1284	2.49796	1.01215	2.35036	1.09539	1.1746	4.40314	2.23588	0.763519	0.651179	1.92248	0.269634	2.75174	1.92372	0.646043	1.74394	0.726248	0.965495	2.98668	1.68866	0.952045	0.700332	2.40043	0.271476	2.59621	1.59089	0.565156	1.40102	0.703068	0.816281	2.69416	1.3823	1.08587	0.824012	2.52991	0.323283	Contig815	-0.713205
dd_Smed_v6_11062_0_1	1264	-0.501998	1.17834	0.403197	0.525443	0.669923	-1.60667	1.17834	3.91313	0.0479102	0.119534	3.87303	2.39167	1.20193	1.59647	0.821545	1.69142	0.148005	1.5609	3.68481	3.28001	3.87754	2.02226	2.44674	1.74569	0.727118	1.12271	0.516245	1.31772	0.0951504	1.11732	4.35474	3.3434	4.58874	1.92976	2.30844	1.44366	0.63608	0.901947	0.499768	1.11407	0.0858315	0.914612	4.96689	3.93385	4.83626	2.29802	NA	NA
dd_Smed_v6_11063_0_1	1727	-0.727985	2.28115	1.70849	0.191182	0.324262	0.383646	2.28115	0.486536	0.485477	0.665686	3.06438	2.76371	5.3138	0.798234	5.88774	7.23551	5.18016	7.4248	5.04586	4.58237	5.6371	4.44896	1.41688	1.47643	2.3528	0.410859	2.70787	4.12568	2.43744	3.88994	4.36453	3.41868	4.88256	3.10728	1.33679	1.22099	2.05822	0.33007	2.62144	3.48807	2.19872	3.18422	4.97805	4.02242	5.14593	3.70026	NA	NA
dd_Smed_v6_11065_0_1	435	3.88739	3.25362	71.9379	2.22e-17	5.05e-16	4.18893	3.25362	81.7102	1.58e-19	4.92e-18	15.7049	11.0017	12.1458	10.5544	12.5057	20.7199	20.4246	7.25606	0.863108	0.771768	0.847194	0.842607	28.829	23.3336	21.3506	21.5675	22.8345	46.9047	38.1547	15.0925	2.96395	2.2859	2.91325	2.33641	27.1995	19.2966	18.6774	17.3266	22.1057	39.6557	34.4179	12.3544	3.38059	2.6896	3.07039	2.78228	NA	NA
dd_Smed_v6_11066_0_1	2132	-3.63813	0.472798	6.14472	0.0131805	0.035854	-4.58274	0.472798	8.88397	0.00287685	0.0108686	0.893776	0	0.189778	0	0.182565	0	0.370012	0	5.6766	2.96648	2.76967	2.42671	0.334753	0	0.0680663	0	0.0680148	0	0.14103	0	3.97737	1.79273	1.94324	1.37291	0.315832	0	0.0595441	0	0.0658439	0	0.127217	0	4.53646	2.10933	2.04806	1.63492	PL04022B2G09	0.0671395
dd_Smed_v6_11067_0_1	4513	0.291672	3.63742	0.665884	0.41449	0.571315	0.17613	3.63742	0.243337	0.621807	0.773907	10.8956	15.6256	11.45	16.1864	17.8458	11.652	12.9134	7.59355	7.66838	10.9736	10.9809	14.6277	1.92782	3.19435	1.94004	3.18816	3.14081	2.54246	2.32519	1.52241	2.53824	3.13287	3.63964	3.90951	1.81886	2.64169	1.69714	2.56126	3.04056	2.14953	2.09746	1.2462	2.89504	3.68615	3.83596	4.65559	NA	NA
dd_Smed_v6_11068_0_1	3733	-5.45863	0.982749	19.0738	1.26e-05	6.81e-05	-2.3793	0.982749	5.01979	0.0250592	0.0701571	0.383047	0	0	0	1.3236	0.37587	0.259008	1.60308	5.17865	4.58237	2.7045	6.13418	0.0819365	0	0	0	0.281625	0.0991514	0.0563817	0.388552	2.0723	1.58158	1.08371	1.98204	0.0773053	0	0	0	0.272636	0.0838279	0.0508597	0.318059	2.3636	1.8609	1.14217	2.36028	NA	NA
dd_Smed_v6_1107_0_1	3197	1.30617	7.11796	22.6237	1.97e-06	1.25e-05	1.07065	7.11796	15.3601	8.88e-05	0.000470233	149.559	157.691	180.036	251.932	126.198	129.581	192.147	179.925	70.8413	79.3474	69.698	79.0365	37.3553	45.5067	43.0616	70.0479	31.3533	39.9134	48.8398	50.9213	33.1008	31.9779	32.6108	29.8194	35.2439	37.6335	37.6701	56.274	30.3526	33.7449	44.0565	41.683	37.7537	37.6253	34.3699	35.51	Contig931	0.99153
dd_Smed_v6_11070_0_1	1469	-1.62576	1.27255	3.21964	0.0727595	0.151086	-0.833241	1.27255	0.886993	0.346294	0.537062	0.212804	3.45463	1.01215	0.133039	3.05797	0.798725	2.51608	1.94057	4.31554	4.02766	3.42136	3.06709	0.115675	2.16966	0.526861	0.0805031	1.65342	0.535419	1.39183	1.19525	4.38842	3.53258	3.48386	2.51836	0.109137	1.79428	0.460896	0.0646733	1.60065	0.452672	1.25551	0.978404	5.0053	4.15644	3.67179	2.99895	NA	NA
dd_Smed_v6_11071_0_1	776	1.13554	1.62561	3.11209	0.0777131	0.159282	0.753323	1.62561	1.38531	0.239198	0.416615	5.27754	4.62389	3.66905	2.70513	3.01233	4.08759	4.32913	1.05466	1.72622	2.36354	1.98765	1.31447	5.43066	5.49741	3.61547	3.09871	3.08328	5.1871	4.53338	1.22971	3.32298	3.92429	3.83144	2.04315	5.12371	4.54629	3.1628	2.48939	2.98487	4.38545	4.08939	1.00661	3.79009	4.61733	4.03811	2.43306	Contig6729	0.416889
dd_Smed_v6_11072_0_1	1679	-10.2001	1.11822	29.1594	6.67e-08	5.4e-07	-3.63335	1.11822	8.03387	0.00459106	0.0163726	0	0	0	0	1.50617	0	0.33301	0	7.46921	5.3059	4.36631	5.86454	0	0	0	0	0.712515	0	0.161172	0	6.64536	4.07164	3.88998	4.21305	0	0	0	0	0.689773	0	0.145387	0	7.57949	4.79069	4.09981	5.01705	PL06014A2E09	-0.0651179
dd_Smed_v6_11073_0_1	1381	0.453334	1.08535	0.237049	0.626345	0.752376	0.905305	1.08535	0.938088	0.33277	0.523385	4.00071	0	1.32845	2.57209	3.1949	3.4768	1.81306	2.36244	1.56023	1.35059	1.82473	1.04483	2.31327	0	0.73557	1.65557	1.83753	2.47916	1.06684	1.54781	1.68768	1.26006	1.97646	0.91257	2.18252	0	0.643473	1.33003	1.77888	2.09602	0.962357	1.267	1.92492	1.48259	2.08307	1.08672	NA	NA
dd_Smed_v6_11074_0_1	3117	-0.795251	1.97061	0.792565	0.373326	0.530246	-0.343768	1.97061	0.15016	0.698382	0.826482	2.72389	7.54704	0.948892	0	5.34004	4.32251	3.0711	2.61556	5.07906	5.71591	6.28878	2.393	0.697808	2.23384	0.232784	0	1.36075	1.36558	0.800644	0.759238	2.43412	2.3627	3.01797	0.926019	0.658366	1.84736	0.203638	0	1.31732	1.15454	0.72223	0.621494	2.77628	2.77996	3.18076	1.10274	PL03018A2E06	-0.102342
dd_Smed_v6_11075_0_1	1415	0.744484	1.56839	1.23274	0.266875	0.41561	0.314619	1.56839	0.221527	0.637879	0.784695	4.76681	5.20852	1.20193	3.6364	1.55181	2.81903	4.18113	2.44681	2.05818	2.74942	1.23821	2.79745	2.69001	3.39602	0.649524	2.28439	0.87107	1.96183	2.40115	1.56457	2.17281	2.50349	1.30894	2.38462	2.53797	2.80847	0.568201	1.8352	0.843267	1.65864	2.16599	1.28072	2.47824	2.94561	1.37955	2.8397	PL020002001G04	0.147851
dd_Smed_v6_11076_0_1	1487	-1.44939	1.39275	2.39156	0.121992	0.229255	-1.7887	1.39275	3.57309	0.0587228	0.140866	0.851216	0	1.83452	4.03552	1.59745	0.751741	2.36807	0.590609	5.47742	3.90707	5.08316	3.9434	0.457101	0	0.943377	2.41237	0.853272	0.497824	1.2941	0.359369	5.50249	3.38533	5.11337	3.1987	0.431264	0	0.825262	1.93801	0.826038	0.420887	1.16736	0.294171	6.27598	3.98319	5.38919	3.80912	NA	NA
dd_Smed_v6_11077_0_1	2006	-1.66945	0.223165	1.70218	0.192004	0.325146	-1.14859	0.223165	0.834028	0.36111	0.551318	0.638412	1.59445	0.0632595	0	0.410772	1.03364	1.81306	0.0421864	2.68891	2.09824	1.98765	0.572973	0.254128	0.733315	0.0241139	0	0.162646	0.50741	0.734451	0.019028	2.00235	1.34768	1.48215	0.344521	0.239764	0.606443	0.0210947	0	0.157454	0.428991	0.66252	0.0155758	2.28382	1.58568	1.5621	0.410269	PL06023A2C07	-0.113159
dd_Smed_v6_11078_0_1	639	-2.85143	0.569973	5.94026	0.0147988	0.0396972	-1.6048	0.569973	2.0872	0.148538	0.290312	1.23426	0	0.316297	0	1.27796	0.657773	0.999031	0.801541	3.35284	3.44884	2.41124	2.19078	1.54237	0	0.378501	0	1.5885	1.01366	1.27046	1.13495	7.83803	6.95396	5.64449	4.13534	1.4552	0	0.331111	0	1.5378	0.857006	1.14603	0.929041	8.93982	8.18204	5.94896	4.92451	NA	NA
dd_Smed_v6_11081_0_1	2559	-1.13291	0.664279	1.11208	0.291631	0.444004	-1.60791	0.664279	2.18688	0.139191	0.276321	0.340486	0	1.45497	2.79382	1.09539	0.469838	1.51705	0.210932	3.28645	2.5806	1.59663	2.62893	0.106246	0	0.434766	0.970472	0.339994	0.180799	0.481739	0.0745801	1.91845	1.2993	0.933296	1.23915	0.100241	0	0.380332	0.779643	0.329142	0.152857	0.434558	0.0610495	2.18813	1.52876	0.983639	1.47562	NA	NA
dd_Smed_v6_11083_0_1	744	-0.302868	2.24384	0.335937	0.562184	0.700015	-0.0632248	2.24384	0.0147771	0.903247	0.949964	3.61767	2.71056	6.83202	3.23728	3.83387	3.66474	5.10616	6.70763	3.55202	5.5712	6.74497	4.31415	3.88274	3.36123	7.02181	3.86779	4.09295	4.85052	5.57704	8.15732	7.13177	9.64797	13.561	6.99416	3.66328	2.77969	6.14265	3.10724	3.96232	4.10089	5.03084	6.67739	8.13428	11.3518	14.2925	8.32889	NA	NA
dd_Smed_v6_11084_0_1	806	-0.261452	-0.319418	0.0299548	0.862593	0.915046	0.240619	-0.319418	0.025473	0.873194	0.932695	2.00036	0	0.379557	0	1.59745	0	0.444014	1.34996	0.896305	0.699415	0.260675	1.01113	1.98178	0	0.360093	0	1.57421	0	0.447656	1.51544	1.66117	1.11805	0.483781	1.51316	1.86977	0	0.315008	0	1.52397	0	0.403813	1.2405	1.89468	1.3155	0.509876	1.80192	Contig3161	0.168361
dd_Smed_v6_11085_0_1	5659	-0.39807	2.5146	0.689958	0.406179	0.56325	-0.96146	2.5146	3.94962	0.0468819	0.11746	4.59656	8.07852	3.54253	6.34153	5.2944	4.55743	2.77509	2.65774	9.3614	7.45238	5.05058	7.8868	0.6486	1.31706	0.478681	0.996115	0.743103	0.793047	0.398492	0.424936	2.47113	1.69674	1.33501	1.68103	0.61194	1.08919	0.418749	0.800243	0.719385	0.670485	0.359464	0.347843	2.8185	1.99639	1.40703	2.00183	NA	NA
dd_Smed_v6_11087_0_1	1961	0.176045	1.78304	0.0645225	0.799486	0.875316	-0.290487	1.78304	0.175251	0.675486	0.810682	2.85157	6.37778	3.73231	2.52774	5.8421	0.798725	3.3301	1.2234	1.8922	3.88296	4.95283	2.96598	1.16115	3.00057	1.45537	1.1458	2.36626	0.401087	1.37995	0.564473	1.4414	2.5512	3.77798	1.82433	1.09552	2.48144	1.27315	0.920498	2.29074	0.3391	1.2448	0.462065	1.64401	3.00175	3.98177	2.17248	NA	NA
dd_Smed_v6_11089_0_1	1369	-0.310715	2.19409	0.308026	0.578894	0.713373	-0.432549	2.19409	0.59708	0.439694	0.625484	4.17096	5.10223	4.61794	3.19294	7.71339	2.06729	4.18113	1.72964	5.04586	5.01649	4.95283	6.16788	2.43285	3.43849	2.57939	2.0732	4.47521	1.48702	2.48183	1.14315	5.50588	4.72125	5.4117	5.43433	2.29534	2.84359	2.25644	1.66554	4.33238	1.2572	2.23877	0.935756	6.27984	5.55503	5.70361	6.47139	NA	NA
dd_Smed_v6_1109_0_1	3361	1.38094	5.39692	16.9997	3.74e-05	0.00018376	1.37292	5.39692	16.8187	4.11e-05	0.000232457	51.5837	68.3486	37.07	55.2112	40.4839	77.1474	62.6429	30.7961	20.8474	25.5166	22.3203	12.7739	12.2554	18.7617	8.43388	14.602	9.56722	22.6033	15.1456	8.29044	9.26569	9.78169	9.93381	4.58426	11.5627	15.5157	7.37792	11.7308	9.26185	19.11	13.6623	6.78636	10.5682	11.5092	10.4696	5.4591	Contig6471	0.664933
dd_Smed_v6_11090_0_1	672	-0.949324	2.69517	2.10563	0.146758	0.264308	-0.140209	2.69517	0.0469945	0.828378	0.906722	1.53219	0.797223	2.53038	11.4857	6.16158	8.64502	7.95525	5.94828	11.5524	8.03121	8.08093	3.9771	1.82065	1.09452	2.87931	15.193	7.28274	12.6682	9.61982	8.0089	25.6801	15.3983	17.9877	7.13857	1.71774	0.905152	2.51881	12.2055	7.0503	10.7104	8.67767	6.5559	29.2899	18.1176	18.958	8.50086	NA	NA
dd_Smed_v6_11092_0_1	3723	2.86545	1.77721	7.14189	0.00753036	0.0220358	3.39983	1.77721	9.62893	0.00191536	0.00758065	9.10801	0.531482	5.94639	0	5.15747	3.52379	7.40023	6.4967	0.165982	0.337648	0.879778	0.741494	1.9535	0.131707	1.22133	0	1.10031	0.932042	1.61523	1.57889	0.0665984	0.116851	0.35348	0.24023	1.84308	0.10892	1.06841	0	1.06519	0.787998	1.45704	1.29244	0.07596	0.137487	0.372547	0.286075	NA	NA
dd_Smed_v6_11093_0_1	1194	1.935	3.92449	32.4007	1.25e-08	1.13e-07	2.18244	3.92449	40.6993	1.78e-10	2.4e-09	13.3215	15.9445	19.1676	25.6322	25.5135	27.0627	19.7216	15.6511	4.01677	4.29296	5.89777	5.15675	8.90908	12.3202	12.2754	19.0826	16.9722	22.3195	13.4221	11.8602	5.02537	4.63247	7.3887	5.20937	8.40552	10.1887	10.7385	15.3302	16.4305	18.8701	12.1076	9.70849	5.73178	5.45057	7.78725	6.20351	Contig6386	0.401799
dd_Smed_v6_11096_0_1	1163	-0.408335	0.156729	0.133906	0.714416	0.816915	-1.06442	0.156729	0.8903	0.345396	0.536344	1.14914	2.28537	0.759114	0	1.55181	0.328887	0.185006	0.590609	1.65982	1.68824	1.20562	1.01113	0.789	1.81296	0.499114	0	1.05981	0.278474	0.129267	0.459485	2.13195	1.87032	1.55066	1.04867	0.744404	1.4993	0.436623	0	1.02599	0.235437	0.116607	0.376124	2.43164	2.20062	1.6343	1.2488	NA	NA
dd_Smed_v6_11097_0_1	2025	-10.1633	1.05984	32.0055	1.54e-08	1.37e-07	-4.01323	1.05984	10.6853	0.00107987	0.00451041	0	0	0	0	0	0	0.518016	0.843728	4.41513	6.56003	5.2135	6.23529	0	0	0	0	0	0	0.207874	0.376988	3.25697	4.17389	3.85113	3.71403	0	0	0	0	0	0	0.187515	0.308594	3.7148	4.911	4.05887	4.4228	NA	NA
dd_Smed_v6_11098_0_1	437	-0.203328	2.33395	0.172376	0.678009	0.79111	-0.556966	2.33395	1.28496	0.25698	0.438628	4.46888	5.79315	4.61794	5.41025	3.1949	5.12123	2.88609	4.68269	7.46921	3.11119	5.99553	6.80826	8.16584	12.2305	8.08053	11.005	5.80694	11.5402	5.36675	9.69538	25.5322	9.17287	20.5225	18.7918	7.70429	10.1145	7.06881	8.84105	5.62159	9.75667	4.84113	7.93641	29.1212	10.7928	21.6295	22.3779	NA	NA
dd_Smed_v6_11099_0_1	926	-0.652003	2.85247	0.568484	0.450862	0.604216	-0.93769	2.85247	1.16606	0.280213	0.465798	2.04292	19.1865	4.04861	0	5.8421	3.00696	4.10713	7.76229	7.36962	8.99592	11.2742	12.0661	1.76166	19.116	3.34324	0	5.01106	3.19769	3.60421	7.58455	11.8885	12.5168	18.2121	15.717	1.66209	15.8087	2.92465	0	4.85112	2.7035	3.25122	6.20854	13.5597	14.7273	19.1944	18.7164	NA	NA
dd_Smed_v6_111_0_1	476	-0.153777	8.9502	0.350602	0.553773	0.693787	-0.203663	8.9502	0.614823	0.432977	0.619631	464.636	491.674	495.132	476.324	493.52	393.912	454.004	520.791	534.696	465.521	585.672	558.716	779.452	952.977	795.402	889.51	823.512	814.913	775.06	989.936	1678.01	1260.06	1840.48	1415.78	735.395	788.1	695.814	714.6	797.227	688.971	699.152	810.338	1913.89	1482.59	1939.76	1685.97	Contig7336	-1.10896
dd_Smed_v6_1110_0_1	1951	0.261445	7.33572	1.09434	0.295511	0.447938	0.304723	7.33572	1.48658	0.222747	0.395246	150.665	148.443	179.847	197.386	159.882	172.759	165.802	198.487	140.056	124.616	131.967	167.611	61.665	70.1963	70.4884	89.9318	65.0899	87.1974	69.0583	92.0503	107.236	82.2959	101.179	103.624	58.1796	58.0515	61.663	72.248	63.0123	73.7213	62.2948	75.3502	122.31	96.8295	106.637	123.399	Contig1574	0.66431
dd_Smed_v6_11100_0_1	1104	1.23293	0.826779	2.10757	0.146572	0.26411	0.618492	0.826779	0.53933	0.462711	0.645241	3.44742	4.305	1.77127	0.310424	1.73437	1.59745	1.77606	1.30778	0.829912	1.61589	0.977531	0.741494	2.4935	3.59763	1.22684	0.249944	1.2478	1.42488	1.30728	1.0718	1.12294	1.88583	1.32448	0.810125	2.35256	2.9752	1.07323	0.200796	1.20797	1.20467	1.17925	0.877354	1.28079	2.21887	1.39593	0.964726	NA	NA
dd_Smed_v6_11101_0_1	712	-0.336804	2.15894	0.128664	0.719822	0.82101	-0.20125	2.15894	0.0461013	0.829992	0.907757	6.63948	0.744074	7.52788	0.753888	0	4.13457	5.25416	7.80448	4.61431	5.08884	6.02811	4.04451	7.44625	0.964159	8.08472	0.9412	0	5.71834	5.99662	9.91779	9.68103	9.20872	12.6644	6.85172	7.02537	0.797348	7.07248	0.756126	0	4.83459	5.40932	8.11847	11.0419	10.835	13.3476	8.15927	NA	NA
dd_Smed_v6_11104_0_1	725	0.204835	0.71254	0.0320103	0.858005	0.911947	-0.0775115	0.71254	0.00458799	0.945997	0.973567	4.00071	2.49796	0.126519	0.310424	0.182565	0.140951	4.10713	1.26559	1.02909	1.78471	2.7045	0.505564	4.40639	3.17878	0.133441	0.380604	0.20001	0.191448	4.60344	1.57945	2.12036	3.17169	5.58	0.841107	4.15733	2.62881	0.116734	0.305763	0.193626	0.16186	4.15259	1.2929	2.41842	3.73182	5.88098	1.00162	Contig6964	0.322049
dd_Smed_v6_11106_0_1	1478	-0.0588368	2.25191	0.0103815	0.918844	0.951568	0.277496	2.25191	0.232282	0.629837	0.779712	4.17096	3.02945	8.03395	1.8182	3.9708	2.86601	4.84715	9.78724	4.61431	4.10002	4.72473	4.28044	2.25343	1.89104	4.1565	1.09351	2.13391	1.90951	2.66498	5.99151	4.66366	3.57414	4.78176	3.49323	2.12606	1.56387	3.63609	0.878486	2.0658	1.6144	2.40398	4.90451	5.31923	4.20534	5.03969	4.15987	Contig1527	0.0292479
dd_Smed_v6_11107_0_1	1853	-0.109727	2.20528	0.0155573	0.900738	0.940249	-0.390697	2.20528	0.196615	0.657467	0.798835	5.95851	0.850371	4.87098	7.05107	3.14925	8.50407	3.77412	0	6.04176	5.71591	3.81237	4.65119	2.56771	0.423394	2.01008	3.38248	1.34991	4.51929	1.65509	0	4.8706	3.97438	3.07754	3.02762	2.42257	0.350142	1.75841	2.71736	1.30682	3.82085	1.493	0	5.55526	4.67627	3.24355	3.6054	NA	NA
dd_Smed_v6_11109_0_1	898	6.13426	0.532382	21.6902	3.2e-06	1.95e-05	6.21524	0.532382	22.1568	2.51e-06	1.81e-05	2.76645	2.44482	1.89778	0.886927	1.64309	2.913	3.47811	0.421864	0	0	0.0977531	0	2.45997	2.51178	1.61601	0.877944	1.4533	3.19435	3.14738	0.425057	0	0	0.162832	0	2.32093	2.07721	1.41368	0.705309	1.40692	2.70067	2.83913	0.347941	0	0	0.171615	0	PL030004A10D12	1.30385
dd_Smed_v6_1111_0_1	2476	0.362	5.41465	1.3892	0.23854	0.384002	0.347199	5.41465	1.2792	0.258049	0.439892	64.0114	35.8219	42.3838	42.3508	61.4333	24.0087	44.5864	52.6908	39.6698	33.186	30.9226	39.8722	20.6438	13.3478	13.0895	15.2043	19.7072	9.54855	14.633	19.2546	23.9334	17.2689	18.6814	19.4237	19.477	11.0385	11.4506	12.2146	19.0782	8.07285	13.1999	15.7614	27.2977	20.3186	19.6891	23.1305	Contig3427	0.422916
dd_Smed_v6_11111_2_1	524	0.998104	0.663822	1.12592	0.288647	0.441097	0.240095	0.663822	0.065972	0.797294	0.8896	1.02146	5.36797	1.96104	0.354771	2.46463	1.4565	0.33301	0.885914	0.896305	1.35059	0.912363	1.17965	1.55658	9.45128	2.86173	0.601827	3.73588	2.73714	0.516427	1.52972	2.55517	3.32088	2.60448	2.71541	1.4686	7.81609	2.50343	0.483486	3.61664	2.31413	0.465849	1.25219	2.91434	3.90736	2.74496	3.23361	NA	NA
dd_Smed_v6_11112_0_1	1229	-1.07787	0.357384	1.03043	0.310059	0.464523	1.05904	0.357384	1.02852	0.310507	0.499856	0.595851	0	1.01215	0.310424	0.410772	3.24188	1.51705	3.29054	1.36106	0.578826	1.27079	0.842607	0.387141	0	0.629747	0.224522	0.265474	2.59755	1.00307	2.42251	1.65432	0.606815	1.5467	0.826964	0.365259	0	0.5509	0.180373	0.257	2.19611	0.904828	1.98301	1.88686	0.71398	1.63013	0.984778	NA	NA
dd_Smed_v6_11113_0_1	1451	-3.93566	0.211481	7.17523	0.00739169	0.0216929	-1.51264	0.211481	1.33125	0.248582	0.428583	0.0851216	0	0.506076	0	2.00822	0	0.555017	0.590609	2.05818	3.37648	1.33596	2.25819	0.0468442	0	0.266699	0	1.0993	0	0.310829	0.368285	2.1189	2.99818	1.37724	1.87718	0.0441964	0	0.233307	0	1.06421	0	0.280387	0.301469	2.41675	3.52766	1.45153	2.23541	Contig3191	-0.338793
dd_Smed_v6_11115_0_1	3604	-0.674783	1.40477	0.499792	0.479591	0.629493	-0.759512	1.40477	0.632067	0.426598	0.613438	2.08548	0	0.948892	5.63199	0.638979	1.83237	2.25707	3.45928	3.7844	3.56943	4.26855	2.25819	0.462066	0	0.201328	1.38909	0.140823	0.500665	0.508912	0.868465	1.56858	1.27607	1.77166	0.755768	0.435949	0	0.176121	1.11595	0.136328	0.423289	0.45907	0.710905	1.78907	1.50142	1.86722	0.899995	NA	NA
dd_Smed_v6_11117_0_1	2110	1.38817	1.66778	3.21654	0.0728977	0.151301	0.245753	1.66778	0.103623	0.747524	0.858942	2.04292	13.2339	2.72016	2.35036	1.36924	3.57077	2.70108	1.5609	1.36106	2.84589	2.86743	0.674085	0.773128	5.78652	0.98579	0.990162	0.51543	1.66647	1.04025	0.669333	0.96358	1.73779	2.0328	0.385342	0.729429	4.78538	0.862365	0.795461	0.498978	1.40893	0.938371	0.5479	1.09903	2.04468	2.14245	0.458879	NA	NA
dd_Smed_v6_11118_0_1	3317	1.72313	3.96003	28.7792	8.11e-08	6.46e-07	1.35678	3.96003	18.1646	2.03e-05	0.000121362	20.0887	29.2315	23.0897	17.0733	15.1073	21.2367	19.8326	13.2043	6.14135	7.66944	7.62474	5.62861	4.83603	8.13051	5.32287	4.57539	3.61754	6.30464	4.85867	3.60182	2.76575	2.97906	3.43846	2.04677	4.56269	6.72383	4.65642	3.67571	3.50207	5.33028	4.38282	2.94836	3.15453	3.50516	3.62393	2.43737	NA	NA
dd_Smed_v6_11120_0_1	2066	-2.1462	0.201094	1.11837	0.290269	0.442895	-2.10885	0.201094	1.08418	0.297765	0.485423	0	1.96648	0	0	0	2.0203	0	0	3.38604	1.37471	2.24832	1.75262	0	0.878156	0	0	0	0.962953	0	0	2.44825	0.857317	1.62784	1.02323	0	0.726225	0	0	0	0.814132	0	0	2.7924	1.00872	1.71565	1.21849	NA	NA
dd_Smed_v6_11122_0_1	921	0.35248	2.0456	0.432812	0.510612	0.657267	0.294557	2.0456	0.303349	0.581791	0.744076	4.63912	3.29519	5.63009	4.16856	2.96669	4.22854	4.55114	5.2733	2.09138	3.37648	5.40901	2.99968	4.02216	3.3009	4.67443	4.02329	2.55849	4.52116	4.01553	5.18052	3.39209	4.72351	8.78501	3.92852	3.79482	2.72981	4.08917	3.23217	2.47683	3.82243	3.62226	4.24065	3.86891	5.5577	9.25888	4.67822	PL03019A1E04	-0.0927897
dd_Smed_v6_11123_0_1	4006	-2.40636	0.97162	3.19591	0.0738226	0.152786	-1.5153	0.97162	1.35407	0.244569	0.423578	1.10658	0	1.64475	0	2.73848	1.7384	0.62902	0	4.6807	2.94236	3.38878	3.60636	0.220574	0	0.31395	0	0.542964	0.427325	0.127596	0	1.7454	0.946337	1.26537	1.08585	0.208107	0	0.274642	0	0.525634	0.361283	0.115099	0	1.99075	1.11346	1.33362	1.29307	NA	NA
dd_Smed_v6_11124_0_1	861	0.373193	3.02634	0.880846	0.34797	0.504407	0.166077	3.02634	0.174947	0.675752	0.810682	10.853	10.8422	10.6908	4.34594	8.53494	8.17518	7.95525	7.1295	7.63519	5.69179	7.26632	7.75198	10.0654	11.6179	9.49471	4.48679	7.87352	9.35003	7.50815	7.49215	13.2468	8.51737	12.624	10.8598	9.49646	9.60786	8.30594	3.60453	7.62222	7.90502	6.77282	6.1329	15.1089	10.0216	13.3049	12.9323	Contig3910	0.155406
dd_Smed_v6_11125_0_1	976	0.942338	2.80668	3.5439	0.0597648	0.128574	0.677344	2.80668	1.84476	0.174395	0.328578	9.27825	4.62389	9.61544	11.7961	3.33182	10.9942	6.84521	8.22634	2.12457	5.95708	5.89777	4.38156	7.59101	4.37089	7.53342	10.7435	2.71146	11.0926	5.69928	7.62619	3.25175	7.86401	9.03904	5.41492	7.16195	3.61467	6.5902	8.63092	2.62492	9.37827	5.1411	6.24262	3.70884	9.25281	9.52662	6.44828	NA	NA
dd_Smed_v6_11128_0_1	2663	0.194896	0.105549	0.0162668	0.898512	0.938671	0.220679	0.105549	0.0208983	0.885056	0.940547	1.57475	0	2.59364	0	0.228207	3.38283	0.62902	0	0.497947	1.15765	1.36854	0.606677	0.472197	0	0.744751	0	0.0680659	1.25092	0.191944	0	0.279323	0.560102	0.768727	0.274789	0.445508	0	0.651505	0	0.0658934	1.05759	0.173146	0	0.318587	0.659017	0.810192	0.327229	PL06010B1D10	-0.0261126
dd_Smed_v6_1113_0_1	1099	0.089682	4.35883	0.0725529	0.787655	0.868225	0.113254	4.35883	0.11588	0.733547	0.849524	30.2607	13.8717	20.6226	18.182	22.0448	28.5192	19.8326	13.9637	23.9015	14.953	23.4282	15.7062	21.9869	11.6451	14.3489	14.7062	15.9324	25.554	14.6644	11.4962	32.4879	17.5304	31.8878	17.238	20.7442	9.63036	12.5523	11.8144	15.4238	21.6047	13.2282	9.4105	37.0547	20.6263	33.6079	20.5276	Contig3568	-0.36034
dd_Smed_v6_11130_0_1	2574	-1.90218	1.14342	3.81733	0.0507249	0.112119	-0.657265	1.14342	0.488207	0.484728	0.665141	0.766094	0	0.253038	2.52774	3.28618	1.31555	1.73905	2.15151	4.44833	3.49707	2.05282	3.40413	0.23766	0	0.0751709	0.87293	1.01404	0.503288	0.549019	0.756284	2.58156	1.75048	1.19296	1.59519	0.224227	0	0.0657592	0.701281	0.981673	0.425507	0.495249	0.619076	2.94445	2.05961	1.25731	1.8996	PL06011B1E10	0.018987
dd_Smed_v6_11132_0_1	881	-9.52346	0.437273	20.8529	4.96e-06	2.91e-05	-4.46159	0.437273	8.27244	0.00402514	0.0146061	0	0	0	0	0	0	0	0.632796	2.39015	5.04061	3.64945	3.30302	0	0	0	0	0	0	0	0.649888	4.05269	7.37169	6.19635	4.52219	0	0	0	0	0	0	0	0.531983	4.62237	8.67355	6.53058	5.38518	NA	NA
dd_Smed_v6_11133_0_1	1923	1.46496	2.5315	7.50743	0.00614449	0.0185849	1.05681	2.5315	3.97361	0.0462185	0.116085	8.34191	6.96241	8.22373	8.86927	7.43954	1.69142	10.0273	5.23111	2.02498	2.72531	3.94271	3.03338	3.46393	3.34035	3.27011	4.09981	3.07283	0.866144	4.23729	2.46131	1.57303	1.82598	3.0669	1.90266	3.26814	2.76243	2.86068	3.29364	2.97475	0.732285	3.82229	2.01477	1.79415	2.14845	3.23233	2.26576	NA	NA
dd_Smed_v6_11134_0_1	4112	-0.957298	1.01816	0.797543	0.371829	0.528781	-0.910427	1.01816	0.724174	0.394778	0.584514	2.51109	2.01963	1.32845	0	0.136924	4.04061	1.33204	0.548423	3.02088	1.97766	3.09552	3.30302	0.487631	0.453139	0.247038	0	0.0264484	0.967637	0.263237	0.120674	1.09743	0.619666	1.12607	0.968883	0.460069	0.37474	0.216108	0	0.0256042	0.818092	0.237456	0.0987808	1.25169	0.7291	1.18681	1.15378	NA	NA
dd_Smed_v6_11136_0_1	350	-3.27747	-0.702988	2.31329	0.128272	0.238142	-1.52485	-0.702988	0.579605	0.446467	0.630487	0	0	0.442816	0	0	1.50348	0	0	1.09548	2.00177	0.847194	0.404451	0	0	0.967449	0	0	4.23008	0	0	4.67555	7.36897	3.62075	1.39384	0	0	0.846321	0	0	3.57634	0	0	5.33279	8.67035	3.81606	1.65983	NA	NA
dd_Smed_v6_11137_0_1	1103	-2.69716	0.920546	3.60408	0.0576378	0.124754	-2.07344	0.920546	2.25053	0.133569	0.267995	0.255365	0	2.15082	0	1.8713	1.40951	0.407013	0	6.6061	1.95354	5.05058	1.95485	0.184871	0	1.49108	0	1.34753	1.25838	0.299858	0	8.94673	2.28195	6.84936	2.13772	0.174422	0	1.30439	0	1.30452	1.0639	0.27049	0	10.2044	2.68495	7.21882	2.54567	NA	NA
dd_Smed_v6_1114_0_1	1299	-0.180679	6.00996	0.155491	0.693342	0.801781	0.621428	6.00996	1.82877	0.176273	0.331215	59.5	72.4941	20.9389	46.2532	52.8071	136.3	113.52	44.7597	42.3919	80.0227	84.4261	18.9418	36.5755	51.488	12.3259	31.651	32.289	103.325	71.014	31.1766	48.7493	79.3714	97.2192	17.5884	34.5082	42.5799	10.7826	25.4273	31.2584	87.3565	64.059	25.5205	55.6019	93.3886	102.463	20.9449	Contig767	-0.351947
dd_Smed_v6_11140_0_1	5626	-1.04158	0.202814	0.703513	0.401606	0.559378	0.886312	0.202814	0.522778	0.469659	0.651772	0	0	0.759114	1.10866	3.78823	1.92634	0.555017	0.885914	1.19507	0.53059	1.59663	0.539268	0	0	0.103176	0.175167	0.534822	0.337172	0.0801659	0.142476	0.317314	0.121512	0.424512	0.115616	0	0	0.0902582	0.140723	0.517751	0.285063	0.0723145	0.116628	0.361919	0.142971	0.447411	0.13768	NA	NA
dd_Smed_v6_11141_0_1	2804	0.27789	2.65229	0.338428	0.560738	0.69883	0.250885	2.65229	0.276685	0.598882	0.75607	3.27718	10.3107	6.19943	6.78499	3.65131	8.26915	5.66118	8.47946	4.94627	4.79943	5.2135	6.94308	0.933266	3.39253	1.69062	2.15093	1.03429	2.90403	1.64063	2.73616	2.63509	2.20532	2.78122	2.98667	0.880516	2.80559	1.47895	1.72798	1.00128	2.45523	1.47995	2.23975	3.0055	2.59479	2.93124	3.55664	NA	NA
dd_Smed_v6_11142_0_1	2364	3.68618	1.2784	18.5054	1.69e-05	8.92e-05	3.83557	1.2784	19.8361	8.44e-06	5.5e-05	3.83047	2.23222	4.6812	2.21732	5.93338	1.92634	2.92309	3.58584	0.365161	0.168824	0.423597	0.0337043	1.29386	0.871169	1.5142	0.833749	1.99355	0.802423	1.0048	1.37244	0.230745	0.0920126	0.268034	0.0171969	1.22073	0.720446	1.32461	0.669804	1.92992	0.678411	0.906387	1.12345	0.26318	0.108262	0.282492	0.0204787	PL06004B1B02	-0.0913805
dd_Smed_v6_11144_0_1	1069	-5.85216	1.63505	21.7189	3.16e-06	1.92e-05	-10.8218	1.63505	41.5454	1.15e-10	1.61e-09	0	0	0.632595	0	0	0	0	0	8.89665	9.2371	7.33148	9.94276	0	0	0.452502	0	0	0	0	0	12.4321	11.1331	10.2588	11.2187	0	0	0.395847	0	0	0	0	0	14.1796	13.0993	10.8122	13.3596	NA	NA
dd_Smed_v6_11145_0_1	2885	-0.824807	3.46038	5.51464	0.0188579	0.0488498	-0.684841	3.46038	3.8388	0.0500792	0.123726	8.08655	11.6395	8.09721	6.0311	10.8626	7.47043	7.43723	11.5169	16.3991	13.1924	12.9034	17.4588	2.23821	3.72219	2.14616	1.85826	2.99062	2.54987	2.09483	3.61193	8.49117	5.89167	6.69026	7.29932	2.1117	3.07821	1.87745	1.49286	2.89517	2.1558	1.88966	2.95664	9.68477	6.93215	7.05114	8.69229	NA	NA
dd_Smed_v6_11146_0_1	639	0.243029	2.702	0.160984	0.688252	0.798629	1.13136	2.702	3.43874	0.0636844	0.150136	5.06473	4.99593	10.3746	0.48781	12.8709	8.03423	10.9523	6.79201	4.38193	5.11296	4.5944	3.53895	6.32906	7.21319	12.4148	0.678586	15.9985	12.3812	13.928	9.61719	10.2438	10.3094	10.755	6.68016	5.97132	5.96522	10.8605	0.545152	15.4878	10.4677	12.5639	7.8724	11.6837	12.13	11.3352	7.95497	Contig3045	0.303251
dd_Smed_v6_11148_0_1	2810	1.18666	0.825517	1.30288	0.253688	0.401451	1.07171	0.825517	1.06961	0.301034	0.489222	0.383047	6.21834	2.0243	0.0443463	1.96258	2.25522	1.36904	2.40462	1.22827	0.434119	0.684272	1.44928	0.10885	2.04164	0.550861	0.0140284	0.554744	0.790318	0.395907	0.774269	0.652953	0.19905	0.364256	0.6221	0.102698	1.68842	0.481891	0.0112699	0.537038	0.668177	0.357133	0.633798	0.744738	0.234203	0.383904	0.740819	PL06015A1A08	-0.0301417
dd_Smed_v6_11149_0_1	6172	-0.544966	3.64504	2.08715	0.148543	0.266311	0.125428	3.64504	0.112182	0.737673	0.852438	10.4274	12.4367	9.0461	4.92244	14.0575	14.0482	8.36226	22.1478	12.0171	15.1942	12.4798	14.021	1.34907	1.85905	1.12075	0.708941	1.80907	2.24136	1.10098	3.24681	2.9085	3.17184	3.02459	2.7401	1.27281	1.53741	0.980427	0.569538	1.75133	1.89497	0.993154	2.65776	3.31735	3.732	3.18774	3.263	NA	NA
dd_Smed_v6_1115_0_1	628	0.16484	5.19632	0.354995	0.551299	0.691653	0.26868	5.19632	0.944199	0.3312	0.521911	40.6881	46.6641	31.5032	29.1355	39.9362	41.9565	51.0246	26.1134	36.0846	31.4254	33.2361	31.2776	51.7358	68.5544	38.3591	41.24	50.5102	65.7898	66.0241	37.6231	85.8334	64.4736	79.1652	60.074	48.8116	56.6937	33.5563	33.1307	48.898	55.6223	59.5578	30.7973	97.899	75.8597	83.4354	71.5383	Contig2311	-0.997194
dd_Smed_v6_11150_0_1	1845	-1.52904	2.2766	3.80684	0.0510437	0.112634	-1.86765	2.2766	5.56265	0.0183476	0.0539907	1.40451	6.80297	0.569335	3.41467	4.10772	3.71172	1.66505	0.168746	9.4278	7.54885	7.95059	10.3135	0.60787	3.40184	0.235963	1.64516	1.76838	1.98106	0.733355	0.0827536	7.63323	5.27163	6.44595	6.74254	0.573511	2.81328	0.20642	1.32166	1.71194	1.67489	0.661531	0.0677401	8.70623	6.20261	6.79365	8.02926	NA	NA
dd_Smed_v6_11151_0_1	461	-2.75597	2.23684	7.02544	0.00803598	0.0233283	-4.54747	2.23684	16.1549	5.84e-05	0.000320139	0	1.59445	2.72016	2.57209	0.0456414	0	1.11003	0.801541	10.7557	15.2424	10.2641	10.2798	0	3.19096	4.51197	4.95952	0.0786375	0	1.95667	1.57317	34.8522	42.6003	33.3045	26.8966	0	2.63888	3.94705	3.98431	0.0761276	0	1.76504	1.28776	39.7514	50.1236	35.101	32.0294	NA	NA
dd_Smed_v6_11152_0_1	1186	-7.05213	0.57447	23.5469	1.22e-06	8.03e-06	-4.86602	0.57447	15.0535	0.000104504	0.0005454	0.0425608	0	0.0632595	0	0.228207	0	0.296009	0	3.45243	4.36531	4.52923	3.67377	0.0286555	0	0.0407862	0	0.152833	0	0.202816	0	4.34846	4.74232	5.71247	3.73629	0.0270358	0	0.0356796	0	0.147954	0	0.182953	0	4.95972	5.57982	6.0206	4.4493	Contig5221	0.422471
dd_Smed_v6_11153_0_1	3521	-0.503963	1.27934	0.243606	0.621614	0.748581	0.0385453	1.27934	0.00143948	0.969735	0.985119	3.23462	0	3.73231	0.310424	0.867186	5.59107	1.14704	2.99523	3.61842	2.62883	2.28091	1.78633	0.733568	0	0.810558	0.0783691	0.195622	1.56368	0.264724	0.769689	1.53514	0.961961	0.969005	0.611939	0.692105	0	0.709073	0.062959	0.189378	1.32202	0.238797	0.630049	1.75093	1.13184	1.02127	0.728719	NA	NA
dd_Smed_v6_11155_0_1	1866	0.218639	3.71573	0.397881	0.528186	0.672441	0.238797	3.71573	0.475813	0.490325	0.669255	17.2371	6.96241	17.2698	13.0822	16.3853	13.3904	13.9864	11.5591	12.3823	13.1201	11.9259	9.4372	7.37626	3.44239	7.077	6.23194	6.9745	7.06643	6.09085	5.60482	9.91251	9.05908	9.56012	6.10021	6.95934	2.84682	6.19093	5.00652	6.75189	5.97434	5.49432	4.58798	11.3059	10.6589	10.0758	7.26435	NA	NA
dd_Smed_v6_11156_0_1	836	0.37998	4.38862	1.30797	0.252762	0.40042	0.452975	4.38862	1.86053	0.172563	0.326157	19.7908	15.0941	22.7734	31.1311	24.3268	15.5047	26.8628	26.704	16.7974	15.5559	24.6338	11.2572	18.9034	16.6576	20.8302	33.1012	23.1127	18.2631	26.1113	28.9015	30.0145	23.9745	44.0767	16.242	17.8349	13.7756	18.2222	26.5923	22.375	15.4406	23.554	23.6581	34.2336	28.2085	46.4542	19.3415	NA	NA
dd_Smed_v6_11157_0_1	3955	-8.12623	-0.841347	16.9742	3.79e-05	0.000186138	-6.46056	-0.841347	13.6525	0.000219951	0.00106773	0	0	0	0	0	0	0	0.0421864	1.12868	2.55648	0.782025	0.977424	0	0	0	0	0	0	0	0.0096511	0.426304	0.83283	0.295773	0.298092	0	0	0	0	0	0	0	0.00790016	0.486229	0.979909	0.311727	0.354978	NA	NA
dd_Smed_v6_11158_0_1	1445	-2.42803	0.518757	2.82431	0.0928469	0.183819	-1.57266	0.518757	1.26323	0.261041	0.443372	1.31938	0	0.632595	0	0.136924	1.97332	1.44304	0	2.32375	1.54354	2.86743	3.87599	0.729099	0	0.334758	0	0.0752634	1.34477	0.811511	0	2.40224	1.37629	2.96831	3.2354	0.687889	0	0.292845	0	0.0728612	1.13694	0.732033	0	2.73992	1.61934	3.12842	3.85283	NA	NA
dd_Smed_v6_11161_0_1	598	0.664831	1.5386	0.997122	0.318008	0.473408	0.641279	1.5386	0.930337	0.334775	0.52515	4.68169	5.20852	1.89778	1.19735	3.83387	3.42982	3.66311	1.8562	2.42334	1.85707	1.95506	1.95485	6.2515	8.03573	2.42671	1.77982	5.09224	5.64792	4.97774	2.8085	6.05352	4.00116	4.89039	3.94298	5.89815	6.64545	2.12288	1.42984	4.9297	4.77506	4.49022	2.29897	6.90446	4.70778	5.15418	4.69545	Contig7224	0.181096
dd_Smed_v6_11162_0_1	1191	-6.7134	2.30606	24.6071	7.03e-07	4.85e-06	-3.06949	2.30606	7.56826	0.00594052	0.0205304	0	0	0.506076	0	0.775903	1.55047	0	3.79677	12.0835	11.1665	10.036	18.234	0	0	0.32492	0	0.517449	1.28194	0	2.88439	15.1557	12.08	12.6047	18.4665	0	0	0.284239	0	0.500933	1.08382	0	2.36109	17.2861	14.2133	13.2846	21.9905	Contig7405	0.0158615
dd_Smed_v6_11163_0_1	3088	0.292386	1.51302	0.0961402	0.756512	0.846829	-0.900215	1.51302	0.893821	0.344444	0.535268	1.91524	9.03519	2.97319	0.886927	3.01233	2.34919	1.11003	0	3.55202	3.44884	2.28091	2.79745	0.495254	2.69943	0.736239	0.255309	0.774814	0.749134	0.292107	0	1.71828	1.43898	1.10488	1.0927	0.467261	2.2324	0.644059	0.205106	0.750083	0.633358	0.263498	0	1.95981	1.69311	1.16448	1.30122	NA	NA
dd_Smed_v6_11164_0_1	887	-0.0502199	1.33181	0.00304156	0.956019	0.974834	-0.155158	1.33181	0.0290882	0.864576	0.928284	4.21352	1.59445	3.03645	1.01997	1.09539	0.0939676	6.4012	1.5609	4.21595	1.71236	2.67192	1.61781	3.79319	1.65843	2.61768	1.02216	0.980885	0.104321	5.86436	1.59221	7.10014	2.48732	4.50593	2.19997	3.57879	1.3715	2.28993	0.821164	0.949578	0.0881989	5.29001	1.30335	8.0982	2.92659	4.74898	2.6198	NA	NA
dd_Smed_v6_11165_0_1	710	0.892808	1.59298	1.70324	0.191865	0.324953	0.814027	1.59298	1.42065	0.233297	0.40914	3.10694	2.60426	3.03645	5.4546	1.78001	6.29583	1.55405	3.83896	1.19507	1.37471	3.19327	1.88744	3.49428	3.38406	3.27025	6.82904	1.9913	8.732	1.77864	4.89222	2.51438	2.49467	6.72762	3.20648	3.29677	2.79858	2.8608	5.48621	1.92774	7.3825	1.60445	4.00466	2.86782	2.93524	7.09051	3.81839	Contig6602	-0.03993
dd_Smed_v6_1117_0_1	447	-3.32005	6.2882	106.487	5.77e-25	2.18e-23	-2.05934	6.2882	45.6352	1.42e-11	2.18e-10	13.3215	23.0132	20.1798	13.5256	56.4127	35.9426	48.3235	26.9993	199.478	182.909	168.461	148.097	23.7974	47.4986	34.5208	26.8971	100.24	79.181	87.8483	54.6507	666.625	527.215	563.737	399.623	22.4523	39.2808	30.1987	21.6082	97.0407	66.9438	79.2446	44.7358	760.331	620.322	594.146	475.886	NA	NA
dd_Smed_v6_11170_0_1	760	0.313312	1.88826	0.18955	0.663292	0.779887	-0.281758	1.88826	0.152891	0.695788	0.8246	5.61802	5.8463	1.89778	4.25725	3.28618	3.61775	4.55114	0.210932	4.24915	3.64178	4.07305	2.22448	5.90273	7.09708	1.90944	4.97933	3.43439	4.68753	4.86619	0.251119	8.35186	6.17391	8.0166	3.53044	5.5691	5.8692	1.67037	4.00021	3.32477	3.96309	4.38961	0.20556	9.52587	7.26423	8.44902	4.20417	Contig2666	-0.134496
dd_Smed_v6_11172_0_1	874	-2.60645	1.52032	6.47033	0.010969	0.0305986	-3.30758	1.52032	9.79509	0.00174978	0.00696941	0.0425608	1.11611	0.885633	2.26166	0.365131	1.31555	0.96203	0	6.5397	5.88473	10.1663	3.74117	0.0388849	1.17817	0.774845	2.30023	0.331825	1.48222	0.894458	0	11.1774	8.67512	17.3995	5.16309	0.0366871	0.974333	0.677831	1.84792	0.321234	1.25315	0.806856	0	12.7486	10.2072	18.338	6.14839	NA	NA
dd_Smed_v6_11175_0_1	860	0.275038	1.5473	0.16088	0.688348	0.798634	0.607145	1.5473	0.784395	0.3758	0.566504	1.36194	1.3287	2.46712	5.89806	3.33182	2.34919	4.03313	4.21864	3.18686	1.56765	1.53147	2.86486	1.26457	1.42542	2.19364	6.0963	3.07719	2.68992	3.81089	4.43838	5.53553	2.34861	2.66375	4.01808	1.1931	1.1788	1.91898	4.89755	2.97898	2.2742	3.43765	3.63315	6.31366	2.76338	2.80743	4.78488	NA	NA
dd_Smed_v6_11176_0_1	662	-4.84377	0.839406	6.30284	0.0120545	0.0331756	-3.35978	0.839406	3.50112	0.0613273	0.145809	0.595851	0	0	0	0	1.7384	0	0	2.32375	3.30413	6.77755	5.56121	0.718725	0	0	0	0	2.58589	0	0	5.24356	6.43072	15.3144	10.1327	0.678101	0	0	0	0	2.18625	0	0	5.98065	7.5664	16.1404	12.0664	NA	NA
dd_Smed_v6_11177_0_1	4468	-0.755369	1.85008	0.877265	0.348952	0.505238	0.335382	1.85008	0.17607	0.674773	0.810084	4.63912	0.0531482	2.78342	1.28604	6.29851	2.77204	2.29407	7.34043	3.98358	4.17237	2.31349	4.34785	0.829099	0.0109746	0.476363	0.255857	1.11969	0.61095	0.417231	1.48648	1.33185	1.20318	0.774531	1.17375	0.782236	0.00907583	0.41672	0.205547	1.08395	0.51653	0.376368	1.2168	1.51906	1.41566	0.81631	1.39774	Contig4188	-0.107888
dd_Smed_v6_11178_0_1	396	-5.50443	2.96751	12.188	0.000480981	0.00188884	-6.23925	2.96751	14.5906	0.00013358	0.000680649	0	1.91333	0	0.0443463	0	1.1746	0	0	19.3535	17.6542	25.872	26.6264	0	4.45767	0	0.0995446	0	2.92087	0	0	73.0062	57.4398	97.728	81.1017	0	3.68644	0	0.0799706	0	2.46946	0	0	83.2687	67.5838	103	96.5789	NA	NA
dd_Smed_v6_11179_0_1	2531	0.144087	3.88801	0.149433	0.699078	0.805676	0.133259	3.88801	0.128071	0.720441	0.841892	10.5976	27.6371	12.2723	10.5101	13.3729	20.25	10.4343	16.4949	14.3741	16.2071	14.0113	10.5831	3.34349	10.0742	3.70773	3.69121	4.19668	7.87866	3.35008	5.89668	8.48364	8.25038	8.28076	5.04354	3.15451	8.33126	3.2435	2.96539	4.06273	6.66104	3.02198	4.82688	9.67618	9.70741	8.72743	6.00603	Contig2976	-0.263965
dd_Smed_v6_1118_0_1	1815	0.711615	7.11649	5.61642	0.017793	0.0465132	0.447597	7.11649	2.23527	0.134893	0.269991	168.413	161.411	164.664	186.654	120.493	150.536	170.057	126.137	112.835	123.845	129.849	49.3768	74.0939	82.0481	69.3738	91.4145	52.73	81.6738	76.138	62.8807	92.8669	87.9145	107.015	32.814	69.9059	67.8528	60.688	73.4392	51.047	69.0514	68.6811	51.4727	105.921	103.44	112.788	39.0761	Contig1885	-0.555958
dd_Smed_v6_11182_0_1	3091	0.319391	2.14524	0.265125	0.606621	0.737216	-0.229045	2.14524	0.136057	0.712233	0.83587	4.29864	7.175	2.72016	6.78499	5.15747	3.99362	4.44014	0.759355	3.22006	4.22061	6.61463	2.76375	1.11049	2.14158	0.672927	1.95122	1.32529	1.27229	1.16729	0.222278	1.55618	1.75928	3.20104	1.07848	1.04772	1.77106	0.588673	1.56754	1.28299	1.07566	1.05297	0.181952	1.77493	2.06998	3.3737	1.2843	NA	NA
dd_Smed_v6_11184_0_1	4701	0.0315909	4.69991	0.0135733	0.907253	0.944348	0.00646549	4.69991	0.000569768	0.980956	0.989696	25.877	25.9363	33.9071	19.335	29.8038	28.7541	21.3497	23.2869	26.524	23.0807	25.6113	27.5027	4.39548	5.09014	5.51535	3.65603	5.03563	6.02321	3.69049	4.482	8.42836	6.32585	8.14941	7.05664	4.14704	4.20949	4.8248	2.93712	4.8749	5.09235	3.32904	3.66886	9.61313	7.443	8.58899	8.4033	NA	NA
dd_Smed_v6_11185_0_1	1142	-1.41227	1.18384	1.58611	0.207882	0.345664	-2.24817	1.18384	3.80626	0.0510613	0.125741	0.127682	1.3287	0.695854	4.03552	0.136924	0.798725	2.51608	0	5.74299	4.96826	3.51911	2.29189	0.0892787	1.07343	0.465934	3.14115	0.0952326	0.688731	1.79036	0	7.51219	5.60529	4.60947	2.4207	0.0842325	0.887715	0.407598	2.52349	0.092193	0.58229	1.61502	0	8.56817	6.59519	4.85811	2.88266	Contig4160	-0.225779
dd_Smed_v6_11186_0_1	1335	-1.2833	2.47439	2.48668	0.114814	0.218445	-0.247394	2.47439	0.0959781	0.756711	0.864264	2.34084	3.08259	6.57898	0	5.8421	6.10789	2.44208	10.1669	4.11636	7.79003	7.23373	10.0102	1.40015	2.13033	3.76834	0	3.47584	4.50536	1.48649	6.89063	4.60603	7.51827	8.10523	9.04427	1.32101	1.76176	3.29653	0	3.36489	3.80907	1.3409	5.64051	5.2535	8.84602	8.54243	10.7702	NA	NA
dd_Smed_v6_11187_0_1	4459	-10.1243	1.06665	28.8745	7.72e-08	6.19e-07	-3.37333	1.06665	7.11259	0.00765446	0.0255265	0	0	0	0	0.867186	0	0	1.2234	4.14956	6.82532	4.98541	5.86454	0	0	0	0	0.154471	0	0	0.248247	1.39014	1.97218	1.67243	1.58639	0	0	0	0	0.149541	0	0	0.203209	1.58555	2.32047	1.76264	1.88913	NA	NA
dd_Smed_v6_11189_0_1	5019	-5.58336	2.46636	18.516	1.68e-05	8.88e-05	-4.90276	2.46636	15.3679	8.85e-05	0.000468657	0	0	0.379557	0.886927	1.00411	0	1.03603	0	10.8884	17.6542	12.9034	20.3237	0	0	0.0578272	0.157082	0.158904	0	0.167741	0	3.24073	4.53201	3.84567	4.88426	0	0	0.050587	0.126194	0.153833	0	0.151313	0	3.69628	5.33237	4.05311	5.81635	NA	NA
dd_Smed_v6_1119_0_1	480	0.345925	5.26601	0.122388	0.726459	0.82567	-2.9089	5.26601	7.49927	0.00617239	0.0211698	4.17096	99.0682	3.73231	136.631	0.456414	17.29	1.77606	5.99047	11.2536	60.3667	4.04046	116.01	6.93869	190.417	5.94578	253.025	0.755248	35.471	3.00675	11.292	35.0223	162.038	12.5914	291.52	6.5465	157.472	5.20135	203.271	0.731142	29.9891	2.71228	9.24335	39.9454	190.654	13.2706	347.152	NA	NA
dd_Smed_v6_11190_0_1	1564	0.473422	2.41585	0.755075	0.384874	0.541877	0.133685	2.41585	0.0604322	0.805814	0.894774	3.23462	9.40723	5.69335	6.82934	5.56825	1.64443	7.03022	5.61079	4.14956	5.08884	5.80002	3.06709	1.65147	5.54928	2.78358	3.88148	2.82783	1.03538	3.65271	3.24592	3.96333	4.19221	5.54724	2.36539	1.55812	4.58919	2.43507	3.11824	2.73757	0.875363	3.29497	2.65703	4.52045	4.93256	5.84646	2.81679	NA	NA
dd_Smed_v6_11193_0_1	1497	1.04611	1.67055	2.57371	0.108652	0.208908	0.93918	1.67055	2.08531	0.148722	0.2905	2.93669	4.19871	4.49142	3.85813	2.6472	6.90662	3.51511	1.30778	2.25736	1.20589	2.44383	1.5841	1.56646	2.58765	2.29422	2.29092	1.40455	4.54321	1.90809	0.790429	2.25255	1.03788	2.44193	1.27636	1.47792	2.13996	2.00697	1.84045	1.35972	3.84107	1.72122	0.647027	2.56918	1.22117	2.57365	1.51994	PL06015B2D04	0.16811
[truncated: 12,141 more rows]
[truncated: 44 more columns]

## Sheet: LEGEND
Supplementary File 2. RNA-Seq and Other Data for All 13,136 Transcripts Detected in Laser Captured Tissue.
[truncated: 17 more rows]
