# Supplementary material for: Cell-type diversity and regionalized gene expression in the planarian intestine
Source: eLife. 2020 Apr 2;9:e52613. doi: 10.7554/eLife.52613 (PMC7117911; doi:10.7554/eLife.52613)
Supplement: Supplementary file 3. — (S3A) Examples of intestine-enriched transcripts (LCM) annotated with digestive physiology-related GO Biological Process Terms. (S3B) Transcripts predicted to encode intestine-enriched solute carrier proteins (SLCs). (S3C) Transcripts predicted to encode intestine-enriched Rab GTPases. (S3D) Transcripts predicted to encode intestine-enriched tumor necrosis factor receptor associated factors (TRAFs). Single cell data from Plass et al. (2018) reprinted with permission from AAAS. [file elife-52613-supp3.xlsx]

## Sheet: S3A. Intestinal GO categories
Functional Category	Putative Function(s)	geneID	uniprot_id_human	uniprot_desc_human	eval_human	logFC_medial	logCPM_medial	FDR_medial	logFC_lateral	logCPM_lateral	FDR_lateral	ML_ratio	phagocyte_EST_ID	phagocyte_log2FC	phagocyte_avgExpr	phagocyte_FDR	WISH_pattern	Fincher_S2_all_clusterIDs	Fincher_S2_all_celltypes	Fincher_intestine_subcluster_IDs	Plass_celltypes	Swapna_Seurat_Cluster
Metabolism	luminal protein catabolism	dd_Smed_v6_1412_0_1	CPA2	Carboxypeptidase A2	1.39e-71	7.92317	8.31702	2.11e-44	4.34064	8.31702	9.9e-19	11.9798	Contig1711	-1.05514	8.06015	0.00396664	goblet	NA	NA	NA	NA	NA
	luminal lipid catabolism	dd_Smed_v6_1565_0_1	LIPF	Gastric triacylglycerol lipase	7.16e-110	5.70547	7.51278	7.21e-72	5.60437	7.51278	9.44e-70	1.07259	Contig6356	3.5441	10.5223	0.000888513	NA	30	Intestine	4	phagocytes	Gut
	luminal lipid catabolism	dd_Smed_v6_257_0_1	LIPF	Gastric triacylglycerol lipase	5.69e-117	4.99268	10.6471	3.26e-47	3.31431	10.6471	1.29e-24	3.20066	Contig6353	-1.16042	11.0951	0.00087641	goblet	10,39	Cathepsin+ cell	5,8	goblet cells	NA
	luminal lipid catabolism	dd_Smed_v6_4693_0_1	LIPF	Gastric triacylglycerol lipase	2.56e-113	6.73605	6.6297	4.54e-78	5.74788	6.6297	2.5e-62	1.98368	Contig1801	-1.01106	8.375	0.000344294	goblet	38	Parapharyngeal	3,8	NA	NA
	neutral lipid transport	dd_Smed_v6_636_0_1	APOB	Apolipoprotein B-100	2.95e-22	5.87168	10.8555	1.56e-57	5.48485	10.8555	4.19e-52	1.30751	Contig6249	0.599804	7.97313	0.0476535	uniform	6,30	Intestine	0,4,7	secretory 2,phagocytes	Gut
	neutral lipid catabolism	dd_Smed_v6_9932_0_1	LIPE	Hormone-sensitive lipase	7.4e-66	2.21444	3.13304	3.33e-06	2.10223	3.13304	1.17e-05	1.08088	PL06022A2F09	0.18152	5.91234	0.408178	uniform	NA	NA	NA	NA	NA
	intracellular cholesterol transport	dd_Smed_v6_4411_0_1	NPC2	Epididymal secretory protein E1	7.61e-23	7.47915	6.3176	1.4e-103	5.39244	6.3176	9.46e-64	4.24778	Contig2425	-0.642893	7.99103	0.0235337	NA	NA	NA	NA	NA	NA
	intracellular cholesterol transport	dd_Smed_v6_602_0_1	NPC2	Epididymal secretory protein E1	1.08e-33	1.0324	8.80245	0.000946274	0.807628	8.80245	0.0137796	1.16859	Contig6514	2.65434	11.078	0.000653169	NA	4,10,15,17,28,30,31,39,41,42	Cathepsin+ cell,Intestine	4	aqp+ parenchymal cells,psap+ parenchymal cells	Cathepsin+ a
	intracellular cholesterol transport	dd_Smed_v6_704_0_1	NPC2	Epididymal secretory protein E1	1.05e-07	5.84102	8.74923	2.62e-45	6.49768	8.74923	1.43e-52	0.634346	Contig4028	-0.990969	10.3575	0.00147511	NA	NA	NA	8	goblet cells	NA
	intracellular cholesterol transport	dd_Smed_v6_73_0_1	NPC2	Epididymal secretory protein E1	4.24e-29	6.41458	10.1581	4.27e-48	5.35295	10.1581	4.32e-37	2.08729	Contig1670	-0.746382	11.5387	0.0354104	goblet	NA	NA	8	goblet cells	NA
	cholesterol and steroid biosynthesis	dd_Smed_v6_8591_0_1	DHCR7	7-dehydrocholesterol reductase	1.31e-56	3.9878	4.43856	3.41e-23	3.75403	4.43856	5.79e-21	1.17591	Contig1308	0.727415	6.7821	0.045701	NA	30	Intestine	4	NA	NA
	sphingolipid metabolism	dd_Smed_v6_2757_0_1	UGCG	Ceramide glucosyltransferase	2.73e-108	2.05289	4.18544	5.69e-07	1.87748	4.18544	5.68e-06	1.12929	Contig2541	0.614884	7.78266	0.0802285	NA	30,35	Intestine,Epidermal	4	NA	NA
	sphingolipid metabolism	dd_Smed_v6_3137_0_1	CERS1	Ceramide synthase 1	2.5e-44	1.93334	6.2083	1.36e-11	1.91704	6.2083	2.36e-11	1.01136	Contig2269	0.648924	8.45857	0.00375035	NA	NA	NA	NA	NA	NA
	sphingolipid metabolism	dd_Smed_v6_4270_0_1	GLTPD1	Ceramide-1-phosphate transfer protein	3.25e-36	1.286	4.60565	6.11e-05	0.705014	4.60565	0.0454136	1.49587	Contig3552	0.576866	7.47645	0.00565374	NA	NA	NA	NA	NA	NA
	sphingolipid metabolism	dd_Smed_v6_7369_0_1	GLTPD1	Ceramide-1-phosphate transfer protein	2.06e-17	1.86019	5.10028	4.94e-10	1.9805	5.10028	3.99e-11	0.919993	Contig2633	1.76557	8.88228	0.000106873	NA	NA	NA	NA	NA	NA
	fatty acid transport	dd_Smed_v6_271_0_1	FABP7	Fatty acid-binding protein, brain	8.76e-30	3.08993	7.81088	5.44e-15	2.98497	7.81088	4.24e-14	1.07547	Contig167	0.852451	10.1944	0.0149756	uniform subset	2,3,6,10,11,19,30	Epidermal,Intestine,Cathepsin+ cell	5,7	late epidermal progenitors 2,late epidermal progenitors 1,pgrn+ parenchymal cells,phagocytes	Gut
	glucosidase/carbohydrate catabolism	dd_Smed_v6_1062_0_1	GAA	Lysosomal alpha-glucosidase	0	6.10067	8.36569	3.41e-68	5.64032	8.36569	5.34e-61	1.37588	NA	NA	NA	NA	uniform subset	19,30	Intestine	4,8	NA	Gut
	glucosidase/carbohydrate catabolism	dd_Smed_v6_3209_0_1	MANBA	Beta-mannosidase	1.14e-124	2.93479	4.94239	5.15e-23	2.6611	4.94239	2.32e-19	1.2089	PL06005A1E03	0.339658	6.37036	0.0412143	NA	17,28,30	Cathepsin+ cell,Intestine	NA	NA	Cathepsin+ b
	fructose biosynthesis	dd_Smed_v6_1002_0_1	SORD	Sorbitol dehydrogenase	3.74e-115	2.67655	7.89183	4.02e-21	2.58944	7.89183	6.82e-20	1.06224	Contig3716	0.389085	9.23378	0.00909352	NA	6,10,19,30	Intestine,Cathepsin+ cell	7	NA	NA
	glycogen synthesis	dd_Smed_v6_885_0_1	GYG2	Glycogenin-2	3.75e-47	2.0266	7.08547	2.52e-13	1.85035	7.08547	2.73e-11	1.12994	PL05003A2D11	0.160541	8.85213	0.626161	NA	4,6,10,19,28,30,31	Cathepsin+ cell,Intestine	5,7	NA	Cathepsin+ a
Transport, import, and export	iron transport	dd_Smed_v6_1261_0_1	FTMT	Ferritin, mitochondrial	9.44e-30	5.55835	7.63427	7.74e-67	5.37359	7.63427	1.88e-63	1.13663	Contig1641	0.578235	8.96002	0.0115821	NA	30	Intestine	4,7	phagocytes	NA
	iron transport	dd_Smed_v6_443_0_1	FTH1	Ferritin heavy chain	3.97e-64	1.4907	7.74495	3.45e-07	1.46836	7.74495	6.18e-07	1.0156	Contig7703	2.01036	10.8699	0.000339823	NA	0,5,7,15,17,22,26,28,41	Neoblast,Muscle,Cathepsin+ cell,Protonephridia	NA	neoblast 1	NA
	iron transport	dd_Smed_v6_6677_0_1	FTH1	Ferritin	4.66e-20	6.0672	4.8499	1.12e-42	5.95306	4.8499	1.9e-41	1.08233	Contig3219	1.08635	8.68374	0.000592471	NA	30	Intestine	4,7	NA	NA
	copper transport	dd_Smed_v6_784_0_1	ATOX1	Copper transport protein ATOX1	5.35e-06	2.6092	6.92388	1.6e-18	2.75444	6.92388	2.72e-20	0.904233	Contig142	1.60186	9.33507	0.000432266	uniform	30	Intestine	4	NA	NA
	vesicle-mediated transport	dd_Smed_v6_1978_0_1	AP3B2	AP-3 complex subunit beta-2	0	1.69299	5.93599	1.51e-10	1.51737	5.93599	1.22e-08	1.12945	Contig1223	0.724862	6.75926	0.00770657	NA	NA	NA	NA	NA	NA
	vesicle-mediated transport	dd_Smed_v6_2510_0_1	AP3S2	AP-3 complex subunit sigma-2	1.46e-85	2.32564	5.7736	1.64e-11	2.38171	5.7736	6.46e-12	0.961883	Contig2102	1.84687	8.07552	0.000659003	NA	30	Intestine	4	NA	NA
	vesicle-mediated transport	dd_Smed_v6_2534_0_1	AP3D1	AP-3 complex subunit delta-1	0	1.76489	8.41573	1.83e-10	1.71815	8.41573	6.57e-10	1.03293	Contig3354	1.50402	8.87017	4.78e-05	NA	20,30	Neural,Intestine	4,7	otf+ cells 1,phagocytes	NA
	vesicle-mediated transport	dd_Smed_v6_2650_0_1	AP1M1	AP-1 complex subunit mu-1	0	1.17619	5.10954	7.37e-05	1.05412	5.10954	0.000490548	1.08829	Contig6283	0.00859272	6.98388	0.885428	NA	20,23	Neural	NA	NA	NA
	vesicle-mediated transport	dd_Smed_v6_4846_0_1	AP3M1	AP-3 complex subunit mu-1	6.49e-127	2.05625	4.83404	6.18e-13	1.96192	4.83404	7.59e-12	1.06757	NA	NA	NA	NA	NA	30,38	Intestine,Parapharyngeal	NA	NA	NA
	vesicle-mediated transport	dd_Smed_v6_9836_0_1	AP5M1	AP-5 complex subunit mu-1	3.6e-13	0.925543	3.87433	0.0377709	1.41638	3.87433	0.000939839	0.711614	NA	NA	NA	NA	NA	NA	NA	NA	NA	NA
	endocytosis	dd_Smed_v6_1463_0_1	PICALM	Phosphatidylinositol-binding clathrin assembly protein	3.09e-115	1.60542	6.758	1.96e-07	1.53021	6.758	8.61e-07	1.05351	Contig1792	1.40497	7.98542	0.000107799	NA	30	Intestine	4	NA	NA
	endocytosis/phagocytosis	dd_Smed_v6_4779_0_1	EPN1	Epsin-1	2.28e-65	1.08848	6.16945	8.03e-05	1.11256	6.16945	6.28e-05	0.983449	Contig3992	0.556683	7.90911	0.00376937	NA	8,9,10,17,20,21,23,24,27,33,37,40	Neural,Cathepsin+ cell,Epidermal,Pharynx,Protonephridia	7	NA	NA
	phagocytosis	dd_Smed_v6_1050_0_1	RAC2	Ras-related C3 botulinum toxin substrate 2	1.1e-108	1.238	6.63087	1.22e-05	0.945424	6.63087	0.0012164	1.22483	Contig5264	0.730085	7.86825	0.0174341	NA	8,10,17,20,21,28,30,33	Neural,Cathepsin+ cell,Intestine	4	NA	NA
	phagocytosis	dd_Smed_v6_3362_0_1	RAC1	Ras-related C3 botulinum toxin substrate 1	4.66e-89	6.64602	6.29195	4.54e-78	6.64101	6.29195	4.31e-78	1.00348	Contig2853	2.39458	11.088	5.33e-05	NA	30	Intestine	4	NA	NA
	phagocytosis	dd_Smed_v6_5922_0_1	RAC1	Ras-related C3 botulinum toxin substrate 1	5.03e-59	7.27533	4.30061	1.1e-34	6.81542	4.30061	1.79e-31	1.37545	NA	NA	NA	NA	NA	10,30	Cathepsin+ cell,Intestine	4	NA	NA
	phagocytosis	dd_Smed_v6_610_0_1	RAC1	Ras-related C3 botulinum toxin substrate 1	2.26e-112	1.0797	7.07131	0.00022211	0.932479	7.07131	0.00191513	1.10743	Contig5482	0.998693	7.40532	0.00546311	NA	10,17,29,30,39,41	Cathepsin+ cell,Protonephridia,Intestine	4	NA	NA
	phagocytosis	dd_Smed_v6_913_0_1	RAC1	Ras-related C3 botulinum toxin substrate 1	2.28e-89	3.25705	6.86166	1.37e-22	3.04344	6.86166	4.19e-20	1.15958	Contig485	2.22896	9.07467	8.92e-05	NA	10,15,17,28,30	Cathepsin+ cell,Intestine	4	NA	NA
	exocytosis	dd_Smed_v6_2186_0_1	EXOC6B	Exocyst complex component 6B	1.89e-130	2.01047	5.3714	8.78e-11	1.84898	5.3714	2.92e-09	1.11844	Contig5590	0.112818	6.18177	0.436338	NA	17,30	Cathepsin+ cell,Intestine	NA	NA	NA
	exocytosis	dd_Smed_v6_4043_0_1	EXOC8	Exocyst complex component 8	4.01e-37	1.07322	4.06606	0.00165605	1.21129	4.06606	0.000372562	0.908737	Contig3995	0.890102	8.09	0.00100689	NA	NA	NA	NA	NA	NA
	exocytosis	dd_Smed_v6_6427_0_1	EXOC1	Exocyst complex component 1	1.15e-89	1.42619	4.259	2.92e-05	1.17395	4.259	0.000789174	1.19106	NA	NA	NA	NA	NA	10,17	Cathepsin+ cell	NA	goblet cells,gut progenitors	NA
	exocytosis	dd_Smed_v6_1311_0_1	VAMP3	Vesicle-associated membrane protein 3	2.66e-15	2.64042	5.09845	5.54e-13	2.58472	5.09845	1.86e-12	1.03936	Contig3395	2.1577	9.62302	6.8e-05	no_signal	10,17,24,28,30	Cathepsin+ cell,Epidermal,Intestine	4	NA	NA
	secretion	dd_Smed_v6_8101_0_1	EZR	Ezrin	1.39e-172	6.044	5.34898	9.8e-27	6.11241	5.34898	4e-27	0.953683	NA	NA	NA	NA	NA	30	Intestine	4	NA	NA
	exocytosis (SNARE complex)	dd_Smed_v6_10167_0_1	STXBP2	Syntaxin-binding protein 2	6.41e-103	1.27288	4.07807	0.00218316	1.86112	4.07807	5.2e-06	0.665155	Contig4564	-0.140489	6.34882	0.496675	NA	9,18,19,20,21,33	Neural,Intestine	2,5	NA	NA
	exocytosis (SNARE complex)	dd_Smed_v6_4489_0_1	STX1A	Syntaxin-1A	2.83e-12	3.02601	1.84387	6.52e-05	2.63535	1.84387	0.000571686	1.31099	NA	NA	NA	NA	NA	9,20,23,33	Neural	NA	NA	NA
	regulated exocytosis	dd_Smed_v6_1195_0_1	SYNGR1	Synaptogyrin-1	1.79e-30	1.22205	6.24458	1.5e-05	0.968338	6.24458	0.000854325	1.19227	Contig7705	0.444705	7.89767	0.13865	NA	7,13,14,16	Muscle	NA	NA	Muscle
	regulated exocytosis	dd_Smed_v6_5946_0_1	SYNGR2	Synaptogyrin-2	8.07e-15	2.16337	3.43383	9.66e-06	2.304	3.43383	2.81e-06	0.907125	Contig1892	1.80167	7.75163	0.00198308	NA	30	Intestine	4	NA	NA
Organelle and cellular physiology	autophagosome maturation; endosome to lysosome transport	dd_Smed_v6_3969_0_1	VPS33A	Vacuolar protein sorting-associated protein 33A	2.76e-82	1.31977	4.43504	1.27e-05	1.21039	4.43504	7.76e-05	1.07876	Contig4757	0.358463	6.73333	0.0199005	NA	17	Cathepsin+ cell	NA	NA	NA
	autophagosome maturation; endosome to lysosome transport	dd_Smed_v6_4534_0_1	VPS16	Vacuolar protein sorting-associated protein 16 homolog	1.97e-81	1.61235	4.54593	3.23e-06	1.45018	4.54593	3.51e-05	1.11897	PL04010A2A09	0.599654	7.27091	0.0168502	NA	NA	NA	NA	NA	NA
	autophagy; endosome to lysosome transport	dd_Smed_v6_4550_0_1	VPS18	Vacuolar protein sorting-associated protein 18 homolog	6.44e-118	1.34443	4.85926	3.89e-05	1.49139	4.85926	5.2e-06	0.903153	PL06013B1A07	0.449785	6.53081	0.0276188	NA	NA	NA	NA	NA	NA
	autophagy; endosome to lysosome transport	dd_Smed_v6_5815_0_1	VPS39	Vam6/Vps39-like protein	3.32e-103	1.67959	5.38598	3.19e-09	1.50224	5.38598	1.53e-07	1.13081	Contig6026	0.470473	6.73743	0.0460753	NA	17,28,31	Cathepsin+ cell	NA	NA	NA
	autophagy; endosome to lysosome transport	dd_Smed_v6_6678_0_1	VPS11	Vacuolar protein sorting-associated protein 11 homolog	7.18e-52	2.00405	3.93963	1.29e-06	1.57309	3.93963	0.000187427	1.34813	NA	NA	NA	NA	NA	17	Cathepsin+ cell	NA	NA	NA
	phagosome acidification	dd_Smed_v6_253_0_1	ATP6V0C	V-type proton ATPase 16 kDa proteolipid subunit	2.75e-63	2.19484	10.1273	3.81e-13	2.05117	10.1273	1.29e-11	1.10471	Contig429	2.93979	12.5909	2.29e-05	NA	8,9,10,17,18,20,21,28,30,41	Neural,Cathepsin+ cell,Intestine	4	phagocytes,ldlrr-1+ parenchymal cells,psap+ parenchymal cells	NA
	autophagosome assembly	dd_Smed_v6_1915_0_1	ATG3	Ubiquitin-like-conjugating enzyme ATG3	2.93e-108	1.99786	7.06596	4.49e-10	1.688	7.06596	1.7e-07	1.23959	Contig4580	1.35947	8.09951	0.000232768	NA	8,9,17,21,23,33	Neural,Cathepsin+ cell	4	NA	Cathepsin+ b
	autophagy	dd_Smed_v6_5083_0_1	ATG7	Ubiquitin-like modifier-activating enzyme ATG7	2.9e-168	2.11306	5.40366	8.36e-14	2.09184	5.40366	1.69e-13	1.01482	PL05001A1C04	1.17287	7.89491	0.00642848	NA	NA	NA	NA	NA	NA
		dd_Smed_v6_3921_0_1	MTOR	Serine/threonine-protein kinase mTOR	0	1.05799	7.03642	0.00094424	1.05171	7.03642	0.00117287	1.00436	NA	NA	NA	NA	NA	NA	NA	NA	NA	NA
Cell shape & motility	actin cytoskeleton organization; regulation of cell shape; vesicle-mediated transport	dd_Smed_v6_8621_0_1	CDC42	Cell division control protein 42 homolog	3.37e-53	4.02046	2.93252	7e-07	3.75934	2.93252	3.5e-06	1.19841	NA	NA	NA	NA	NA	27	Pharynx	NA	NA	NA
	actin cytoskeleton organization; cell junction assembly; cell-matrix adhesion; cell migration	dd_Smed_v6_2784_0_1	RHOA	Transforming protein RhoA	7.01e-39	2.60961	4.34705	3.06e-09	2.21027	4.34705	5.68e-07	1.31891	NA	NA	NA	NA	uniform	2,13,17,29	Epidermal,Muscle,Cathepsin+ cell,Protonephridia	NA	NA	NA
	actin filament organization	dd_Smed_v6_1714_0_1	EVL	Ena/VASP-like protein	2.29e-16	2.04588	4.73129	1.94e-11	1.86987	4.73129	1.04e-09	1.12976	Contig6116	1.39792	8.65343	0.00121753	NA	3,17,29,30	Epidermal,Cathepsin+ cell,Protonephridia,Intestine	4	NA	NA
	actin cytoskeleton organization; regulation of cell morphogenesis	dd_Smed_v6_260_0_1	CFL1	Cofilin-1	6.48e-10	2.62977	9.54785	1.37e-16	2.52069	9.54785	2.25e-15	1.07854	Contig513	3.26615	11.2075	2.37e-05	uniform	4,6,10,15,17,19,24,27,28,29,30,37,39	Cathepsin+ cell,Intestine,Epidermal,Pharynx,Protonephridia	4,7	phagocytes,aqp+ parenchymal cells,ldlrr-1+ parenchymal cells	Gut
	cytoskeleton organization	dd_Smed_v6_4193_0_1	SVIL	Supervillin	7.8e-152	1.13067	4.80664	0.00211748	1.27011	4.80664	0.000554001	0.907872	PL04009A1F04	0.881495	7.86441	0.00548893	NA	13,14,16,30,32,33	Muscle,Intestine,Neural	4,7	NA	Muscle
	cytoskeleton organization	dd_Smed_v6_929_0_1	AVIL	Advillin	1.19e-59	1.62283	8.17093	5.76e-08	1.49935	8.17093	6.65e-07	1.08936	Contig4707	0.867501	8.68141	0.0300244	NA	2,3,6,11,19,28,40	Epidermal,Intestine,Cathepsin+ cell,Protonephridia	7	late epidermal progenitors 2,phagocytes	Early_epithelial_progeny
	cell adhesion	dd_Smed_v6_2654_0_1	PCDH1	Protocadherin-1	2.31e-75	1.28698	5.94203	1.15e-05	1.18374	5.94203	6.82e-05	1.07418	PL05003B2E03	1.52893	8.02731	0.000392681	NA	2,10,11,17,30,39	Epidermal,Cathepsin+ cell,Intestine	4	NA	NA
	cell adhesion	dd_Smed_v6_6251_0_1	PCDH1	Protocadherin-1	9.25e-69	0.502622	4.07495	0.212861	1.48457	4.07495	2.33e-05	0.506297	Contig6309	-0.552993	7.5099	0.0509165	NA	7,13,14,16,19,26,41	Muscle,Intestine,Protonephridia,Cathepsin+ cell	2,3,5	NA	Muscle
	cell adhesion	dd_Smed_v6_1916_0_1	CHL1	Neural cell adhesion molecule L1-like protein	1.79e-93	1.03801	5.94715	0.000248305	0.635588	5.94715	0.0392637	1.32173	PL08005B1E08	0.64429	7.90941	0.00685018	NA	20,23,24,27,30,33,37,40	Neural,Epidermal,Pharynx,Intestine,Protonephridia	4	NA	NA
	cell adhesion; basement membrane assembly	dd_Smed_v6_6093_0_1	LAMB1	Laminin subunit beta-1	0	4.17698	4.65511	2.88e-31	3.90679	4.65511	5.22e-28	1.20597	NA	NA	NA	NA	NA	6,25,27,30,43	Intestine,Pharynx	7	NA	NA
	cell adhesion; extracellular matrix organization	dd_Smed_v6_7359_0_1	LAMC1	Laminin subunit gamma-1	0	3.6066	3.34358	2.65e-15	3.68558	3.34358	8.33e-16	0.946727	PL08001A2F12	0.722695	7.53414	0.014268	NA	13,16,25,43	Muscle,Pharynx,Intestine	7	NA	NA
	cell adhesion; extracellular matrix organization	dd_Smed_v6_7924_0_1	LAMA1	Laminin subunit alpha-1	0	4.29197	4.68707	1.31e-15	4.10059	4.68707	1.72e-14	1.14186	NA	NA	NA	NA	NA	9,13,16,23,25,27,30,33,34,37,43	Neural,Muscle,Pharynx,Intestine	7	NA	NA
	cell-matrix adhesion	dd_Smed_v6_13292_0_1	NID2	Nidogen-2	5.25e-07	0.411298	2.58267	0.624758	3.03246	2.58267	4.65e-06	0.162537	Contig1612	-0.195867	6.26458	0.219987	NA	NA	NA	NA	NA	NA
	cell-matrix adhesion	dd_Smed_v6_25_0_1	NID2	Nidogen-2	2.96e-10	3.47063	12.5196	6.63e-17	6.47864	12.5196	2.98e-43	0.124307	Contig2192	-0.838586	11.9592	0.0169822	goblet	32,41	Neural,Cathepsin+ cell	8	goblet cells	NA
	maintenance of epithelial cell apical/basal polarity	dd_Smed_v6_1009_0_1	LIN7B	Protein lin-7 homolog B	2.02e-98	1.04968	7.46663	0.000244935	0.867773	7.46663	0.00337201	1.13438	Contig5190	0.824981	9.21782	0.00122862	NA	18,21,29	Neural,Protonephridia	NA	NA	Early_epithelial_progeny
	establishment or maintenance of cell polarity	dd_Smed_v6_1830_0_1	PARD6B	Partitioning defective 6 homolog beta	7.09e-74	1.33285	4.26009	0.00325197	1.35116	4.26009	0.00321611	0.987393	Contig3688	0.804207	9.00294	0.000826022	NA	26	Protonephridia	NA	NA	NA
Stimuli response & defense	innate immune response	dd_Smed_v6_1523_0_1	PGLYRP3	Peptidoglycan recognition protein 3	8.75e-40	3.56807	7.1824	1.41e-31	2.34429	7.1824	2.23e-15	2.33557	Contig6433	0.377045	9.07687	0.0949275	goblet	11,24,27,29,30,37	Epidermal,Pharynx,Protonephridia,Intestine	4	NA	NA
	innate immune response	dd_Smed_v6_8505_0_1	PGLYRP1	Peptidoglycan recognition protein 1	2.09e-30	2.11131	3.32681	0.00915311	2.91458	3.32681	0.000327446	0.573047	Contig4774	1.51371	8.19236	6.18e-05	uniform subset	NA	NA	NA	NA	NA
	innate immune response	dd_Smed_v6_1937_0_1	TOLLIP	Toll-interacting protein	1.14e-51	1.12123	5.71334	0.000111178	1.04816	5.71334	0.000376532	1.05195	Contig340	0.840758	9.03341	0.00151087	NA	NA	NA	NA	NA	NA

## Sheet: S3B. Intestine-enriched SLCs
geneID	uniprot_id_human	uniprot_desc_human	eval_human	logFC_medial	logCPM_medial	FDR_medial	logFC_lateral	logCPM_lateral	FDR_lateral	ML_ratio	phagocyte_EST_ID	phagocyte_log2FC	phagocyte_avgExpr	phagocyte_FDR	WISH_pattern	Fincher_S2_all_clusterIDs	Fincher_S2_all_celltypes	Fincher_intestine_subcluster_IDs	Plass_celltypes	Swapna_Seurat_Cluster
dd_Smed_v6_1009_1_1	SLC8B1	Sodium/potassium/calcium exchanger 6, mitochondrial	2.76e-44	3.40152	5.36096	2.3e-33	3.29658	5.36096	1.33e-31	1.07545	PL05007B1C09	2.08704	8.16411	0.00079931	NA	10,28,30	Cathepsin+ cell,Intestine	4	NA	NA
dd_Smed_v6_10160_0_1	SLC39A1	Zinc transporter ZIP1	1.21e-36	10.9602	3.87037	2.73e-62	10.5503	3.87037	6.67e-58	1.3286	Contig2670	2.29772	8.1621	3.4e-05	NA	30	Intestine	NA	NA	NA
dd_Smed_v6_1048_0_1	SLC37A2	Glucose-6-phosphate exchanger SLC37A2	6.03e-121	1.69898	5.40334	3.93e-09	1.3481	5.40334	4.23e-06	1.27534	Contig1560	0.767019	7.72962	0.00252561	NA	10,17,30	Cathepsin+ cell,Intestine	4	NA	NA
dd_Smed_v6_10595_0_1	SLC47A2	Multidrug and toxin extrusion protein 2	6e-55	6.07877	3.64579	1.75e-15	6.39265	3.64579	1.44e-16	0.804476	NA	NA	NA	NA	NA	30	Intestine	4	NA	NA
dd_Smed_v6_10656_0_1	SLC16A9	Monocarboxylate transporter 9	0.000538	3.97235	4.52991	8.38e-23	3.80588	4.52991	3.27e-21	1.12231	Contig2353	1.85825	7.61356	0.00014356	NA	NA	NA	4	NA	NA
dd_Smed_v6_11330_0_1	SLC10A2	Ileal sodium/bile acid cotransporter	3.08e-37	1.41597	2.96163	0.0148804	1.82234	2.96163	0.0014837	0.754522	NA	NA	NA	NA	basal low	16,19,28,31	Muscle,Intestine,Cathepsin+ cell	2,5	NA	NA
dd_Smed_v6_11586_0_1	SLC39A13	Zinc transporter ZIP13	1.4e-72	1.78321	4.7043	3.57e-06	1.5397	4.7043	7.85e-05	1.18387	Contig2544	0.0425047	6.06368	0.643741	NA	6	Intestine	7	NA	NA
dd_Smed_v6_1159_0_1	SLC22A6	Solute carrier family 22 member 6	9.98e-29	4.88615	6.78214	4.4e-35	5.13731	6.78214	7.88e-38	0.840219	Contig1815	-0.406919	8.2542	0.0129047	basal	19,30	Intestine	2,5	NA	NA
dd_Smed_v6_1171_0_1	SLC13A3	Solute carrier family 13 member 3	2.3e-55	6.71202	7.19283	2.59e-67	6.6005	7.19283	1.72e-65	1.08037	Contig7480	2.83985	8.6752	0.00062505	NA	30	Intestine	4	phagocytes	Gut
dd_Smed_v6_11730_0_1	SLC52A3	Solute carrier family 52, riboflavin transporter, member 3	2.92e-66	6.43733	5.60484	7.29e-58	6.28066	5.60484	9.33e-56	1.11471	NA	NA	NA	NA	NA	NA	NA	NA	NA	NA
dd_Smed_v6_11807_0_1	SLC6A19	Sodium-dependent neutral amino acid transporter B(0)AT1	6.05e-12	5.54348	2.49242	3.15e-12	5.26935	2.49242	2.8e-11	1.20926	Contig92	1.9174	7.26409	0.00010083	uniform subset	NA	NA	NA	NA	NA
dd_Smed_v6_11818_0_1	SLC15A4	Solute carrier family 15 member 4	2.63e-13	2.04827	4.48799	1.66e-07	2.13421	4.48799	5.65e-08	0.942168	PL05017B1B03	0.592897	6.40355	0.0115357	NA	30	Intestine	NA	NA	NA
dd_Smed_v6_12311_0_1	SLC16A12	Monocarboxylate transporter 12	3.04e-16	1.74822	2.84691	0.00218702	2.00942	2.84691	0.00043765	0.834395	PL05001B2H12	0.432821	6.62451	0.236121	NA	20,31	Neural,Cathepsin+ cell	NA	NA	NA
dd_Smed_v6_12626_0_1	SLC35C1	GDP-fucose transporter 1	6.08e-97	1.60746	2.69622	0.00945434	0.933048	2.69622	0.179736	1.59594	NA	NA	NA	NA	NA	36	Neural	NA	NA	NA
dd_Smed_v6_12990_0_1	SLC8A1	Sodium/calcium exchanger 1	7.5e-54	6.03549	3.27158	1.99e-18	5.50152	3.27158	5.24e-16	1.44791	Contig4568	1.12438	7.43271	0.00015781	uniform	NA	NA	NA	NA	NA
dd_Smed_v6_1513_0_1	SLC31A1	High affinity copper uptake protein 1	1.9e-17	3.21921	4.49224	5.8e-06	3.41078	4.49224	2.01e-06	0.875652	Contig1777	1.75612	9.69377	7.55e-05	NA	10,29,30	Cathepsin+ cell,Protonephridia,Intestine	4	NA	NA
dd_Smed_v6_1731_0_1	SLC39A14	Zinc transporter ZIP14	7.95e-69	0.405168	4.78723	0.263265	1.14146	4.78723	0.00026649	0.60028	Contig5021	-1.31367	8.32238	0.00042132	NA	10,19,31	Cathepsin+ cell,Intestine	2,5	pigment	NA
dd_Smed_v6_1738_0_1	SLC12A9	Solute carrier family 12 member 9	9.92e-162	3.56662	4.98094	5.09e-11	3.2654	4.98094	1.61e-09	1.23219	Contig5531	1.92185	8.89198	4.13e-05	NA	10,17,28,29,30,33,41	Cathepsin+ cell,Protonephridia,Intestine,Neural	4	NA	NA
dd_Smed_v6_1823_0_1	SLC25A20	Mitochondrial carnitine/acylcarnitine carrier protein	7.07e-65	2.29084	6.37716	1.84e-14	1.87529	6.37716	3.83e-10	1.33381	Contig3880	0.484189	7.73307	0.00416941	NA	3,31	Epidermal,Cathepsin+ cell	NA	NA	NA
dd_Smed_v6_1874_0_1	SLC17A5	Sialin	1.78e-111	2.87412	5.38259	4.49e-10	3.12575	5.38259	1.83e-11	0.839945	Contig3687	2.54003	9.13616	2.44e-05	NA	10,17,28,30,40,41	Cathepsin+ cell,Intestine,Protonephridia	4	NA	NA
dd_Smed_v6_18975_0_1	SLC16A4	Monocarboxylate transporter 5	4.43e-26	5.11567	3.3812	5.58e-23	5.41979	3.3812	3.89e-25	0.809936	NA	NA	NA	NA	NA	NA	NA	NA	NA	NA
dd_Smed_v6_1904_0_1	SLC37A3	Sugar phosphate exchanger 3	6.41e-128	2.436	5.5612	1.48e-13	2.11178	5.5612	1.53e-10	1.25199	Contig5470	1.41132	8.6412	5.77e-05	NA	17,28,30	Cathepsin+ cell,Intestine	4	NA	NA
dd_Smed_v6_20353_0_1	SLC32A1	Vesicular inhibitory amino acid transporter	3.64e-41	6.29428	2.25472	2.95e-11	6.96802	2.25472	5.72e-13	0.626877	PL06018A1E03	0.177794	6.07184	0.463827	NA	NA	NA	NA	NA	NA
dd_Smed_v6_2053_0_1	SLC35F6	Solute carrier family 35 member F6	3.87e-57	1.96558	4.44531	7.87e-08	2.19782	4.44531	2.16e-09	0.851313	NA	NA	NA	NA	NA	17,30	Cathepsin+ cell,Intestine	4	NA	NA
dd_Smed_v6_2361_0_1	SLC47A1	Multidrug and toxin extrusion protein 1	2e-90	7.04158	5.77682	7.34e-26	7.07888	5.77682	5.32e-26	0.974477	PL06018A2B12	1.30175	7.53937	0.00830667	uniform	30	Intestine	4	NA	NA
dd_Smed_v6_2530_0_1	SLC38A7	Putative sodium-coupled neutral amino acid transporter 7	2.43e-37	2.28921	6.21812	5.14e-14	2.23034	6.21812	2.48e-13	1.04165	Contig2706	0.432974	7.23575	0.0238866	NA	10,17,19,28,39	Cathepsin+ cell,Intestine	7	NA	NA
dd_Smed_v6_2596_0_1	SLC36A1	Proton-coupled amino acid transporter 1	1.35e-32	2.76917	6.49283	1.71e-23	2.63469	6.49283	1.71e-21	1.0977	Contig7529	2.00203	9.34262	0.00084964	NA	17,30	Cathepsin+ cell,Intestine	4	NA	NA
dd_Smed_v6_3236_0_1	SLC30A3	Zinc transporter 3	5.38e-78	1.63563	4.85348	2.93e-07	1.28167	4.85348	8.14e-05	1.27806	Contig3522	1.14338	7.48152	0.00115356	NA	10	Cathepsin+ cell	NA	NA	NA
dd_Smed_v6_3252_0_1	SLC16A12	Monocarboxylate transporter 12	1.85e-09	3.37344	4.99863	1.63e-22	3.33956	4.99863	4.39e-22	1.02376	Contig4237	2.37556	9.34325	2.33e-05	NA	10,30	Cathepsin+ cell,Intestine	4	NA	NA
dd_Smed_v6_3499_0_1	SLCO1B3	Solute carrier organic anion transporter family member 1B3	1.87e-48	6.09127	5.41075	1.69e-52	6.09697	5.41075	1.69e-52	0.996059	NA	NA	NA	NA	NA	30	Intestine	4,5	NA	NA
dd_Smed_v6_3508_0_1	SLC28A3	Solute carrier family 28 member 3	7.71e-110	5.36191	5.99382	8.4e-41	4.94457	5.99382	4.61e-36	1.33547	Contig3413	2.73974	8.6929	2.61e-05	NA	10,30,43	Cathepsin+ cell,Intestine	4,7	NA	NA
dd_Smed_v6_3578_0_1	SLC15A4	Solute carrier family 15 member 4	1.15e-66	7.39823	3.59028	7.41e-21	7.28528	3.59028	2.38e-20	1.08144	Contig1439	2.353	7.66251	0.00016331	NA	30	Intestine	4	NA	NA
dd_Smed_v6_3596_0_1	SLC25A11	Mitochondrial 2-oxoglutarate/malate carrier protein	2.67e-141	1.66384	3.51301	0.00116415	1.52758	3.51301	0.00352328	1.09906	Contig2532	0.506023	7.91071	0.0100815	NA	NA	NA	NA	NA	NA
dd_Smed_v6_3821_0_1	SLC2A4RG	SLC2A4 regulator	1.67e-08	4.09929	5.80063	4.05e-34	4.15679	5.80063	7.3e-35	0.960927	Contig3306	2.78908	8.15807	3.98e-05	NA	30	Intestine	4	NA	NA
dd_Smed_v6_3874_0_1	SLC30A1	Zinc transporter 1	3.78e-55	1.4043	3.71354	0.00040315	1.26893	3.71354	0.00174886	1.09838	Contig4558	0.550147	8.16284	0.00394013	NA	NA	NA	NA	NA	NA
dd_Smed_v6_4192_0_1	SLC44A2	Choline transporter-like protein 2	2.23e-123	2.34854	4.63251	7.5e-09	2.04997	4.63251	5.29e-07	1.22993	NA	NA	NA	NA	NA	10,29	Cathepsin+ cell,Protonephridia	NA	NA	NA
dd_Smed_v6_4290_0_1	SLC6A5	Sodium- and chloride-dependent glycine transporter 2	7.4e-175	5.45691	3.54223	1.68e-18	5.14577	3.54223	6.88e-17	1.24069	Contig4940	1.16325	6.85224	0.00107939	NA	11,30,40	Epidermal,Intestine,Protonephridia	4	NA	NA
dd_Smed_v6_4396_0_1	SLC2A1	Solute carrier family 2, facilitated glucose transporter member 1	1.03e-114	0.848514	4.94182	0.00293075	1.03371	4.94182	0.00024626	0.879527	NA	NA	NA	NA	NA	NA	NA	NA	NA	NA
dd_Smed_v6_4634_0_1	SLC16A12	Monocarboxylate transporter 12	0.000469	3.89608	7.12497	6.96e-30	3.6918	7.12497	2.41e-27	1.15211	Contig1258	1.39117	7.94094	0.00064909	NA	30	Intestine	4	NA	NA
dd_Smed_v6_4694_0_1	SLC16A14	Monocarboxylate transporter 14	5.13e-05	1.71261	5.2286	1.4e-09	1.54022	5.2286	6.54e-08	1.12692	Contig1454	1.37525	8.43612	0.0009735	NA	10,17	Cathepsin+ cell	NA	NA	NA
dd_Smed_v6_4739_0_1	SLC11A2	Natural resistance-associated macrophage protein 2	0	3.3774	4.5092	4.38e-14	3.09542	4.5092	3.74e-12	1.21586	Contig3248	1.37812	7.7065	0.00013241	NA	30	Intestine	4	NA	NA
dd_Smed_v6_4836_0_1	SLC2A13	Proton myo-inositol cotransporter	9.02e-54	1.39911	2.59954	0.0310384	1.94228	2.59954	0.0022675	0.686261	Contig1055	0.929098	6.95253	0.00174119	NA	10,28,30	Cathepsin+ cell,Intestine	4,7	NA	NA
dd_Smed_v6_5125_0_1	SLC47A2	Multidrug and toxin extrusion protein 2	2.92e-69	7.15377	3.95866	4e-43	6.89309	3.95866	1.02e-40	1.19804	NA	NA	NA	NA	NA	30	Intestine	4	NA	NA
dd_Smed_v6_5476_0_1	SLC13A3	Solute carrier family 13 member 3	1.56e-97	4.07457	5.51827	1.42e-28	4.23719	5.51827	2.23e-30	0.893405	Contig5206	1.03101	7.4898	0.00079478	NA	19,30,31,42	Intestine,Cathepsin+ cell	2,5	glia	NA
dd_Smed_v6_5528_0_1	SLC46A1	Proton-coupled folate transporter	2.12e-19	6.94411	4.86283	5.6e-45	7.00898	4.86283	1.49e-45	0.956032	Contig2684	2.6546	8.65832	2.61e-05	NA	30	Intestine	4	NA	NA
dd_Smed_v6_5546_0_1	SLC52A3	Solute carrier family 52, riboflavin transporter, member 3	3.61e-54	1.61368	4.48092	9.93e-08	1.80135	4.48092	2.75e-09	0.878025	Contig41	0.672151	7.46684	0.0621281	NA	10	Cathepsin+ cell	NA	NA	NA
dd_Smed_v6_5660_0_1	SLC9A1	Sodium/hydrogen exchanger 1	5.27e-59	6.1212	5.56196	8.26e-58	5.81582	5.56196	1.54e-53	1.23575	PL06017A2G04	0.50189	6.14869	0.0107907	NA	30	Intestine	4	NA	NA
dd_Smed_v6_5702_0_1	SLC39A1	Zinc transporter ZIP1	6.34e-43	5.71582	7.00152	1.07e-52	5.79469	7.00152	1.16e-53	0.946796	Contig5795	2.19588	8.85438	0.0003357	NA	30	Intestine	4	NA	NA
dd_Smed_v6_5954_0_1	SLC31A1	High affinity copper uptake protein 1	2.3e-28	2.68541	4.2312	8.63e-11	2.88763	4.2312	4.18e-12	0.869211	Contig2150	0.0974415	7.05078	0.440751	NA	NA	NA	NA	NA	NA
dd_Smed_v6_6663_0_1	SLC5A1	Sodium/glucose cotransporter 1	1.72e-173	4.11358	3.67485	7.9e-25	3.56608	3.67485	1.56e-19	1.46156	PL05005B2B08	0.705551	7.14025	0.00578229	uniform low; protonephridia	29	Protonephridia	NA	NA	NA
dd_Smed_v6_6691_0_1	SLC15A4	Solute carrier family 15 member 4	2.2e-05	1.98634	4.37289	6.72e-07	2.20675	4.37289	3.88e-08	0.858319	Contig4894	0.537717	6.66812	0.0495716	NA	10,17,28,39,41	Cathepsin+ cell	NA	NA	NA
dd_Smed_v6_6703_0_1	SLC35B2	Adenosine 3'-phospho 5'-phosphosulfate transporter 1	4.43e-105	2.17044	3.72991	3.29e-07	1.97487	3.72991	4.04e-06	1.14518	NA	NA	NA	NA	NA	19	Intestine	2,5	NA	NA
dd_Smed_v6_6792_0_1	SLC31A1	High affinity copper uptake protein 1	4.76e-06	5.39819	4.77194	3.2e-51	5.34633	4.77194	1.95e-50	1.0366	Contig5836	1.8714	8.31881	9.96e-05	NA	6,30	Intestine	NA	NA	NA
dd_Smed_v6_6848_0_1	SLC29A1	Equilibrative nucleoside transporter 1	3.22e-71	2.20843	5.31897	5.05e-15	1.66594	5.31897	4.23e-09	1.45648	Contig3863	1.14175	7.74397	0.00052113	NA	10	Cathepsin+ cell	NA	NA	NA
dd_Smed_v6_7075_0_1	SLC16A12	Monocarboxylate transporter 12	1.97e-07	2.70633	4.2923	3.11e-13	2.7405	4.2923	1.84e-13	0.976593	NA	NA	NA	NA	NA	10,15,28,30,31	Cathepsin+ cell,Intestine	NA	NA	NA
dd_Smed_v6_7104_0_1	SLC26A11	Sodium-independent sulfate anion transporter	1.55e-110	2.05986	4.47841	1.23e-11	1.98363	4.47841	7.86e-11	1.05426	Contig2366	1.55113	7.30983	0.00015844	NA	NA	NA	NA	NA	NA
dd_Smed_v6_7121_0_1	SLC24A5	Sodium/potassium/calcium exchanger 5	3.52e-116	6.0094	5.17555	6.14e-50	5.68007	5.17555	7.23e-46	1.25643	PL06017B2C01	0.712669	7.23183	0.00983567	NA	30	Intestine	7	NA	NA
dd_Smed_v6_7229_0_1	SLC8A1	Sodium/calcium exchanger 1	0	5.32269	5.93809	1.3e-57	5.0383	5.93809	5.99e-53	1.21789	NA	NA	NA	NA	NA	30	Intestine	4,7	NA	NA
dd_Smed_v6_7241_0_1	SLC47A1	Multidrug and toxin extrusion protein 1	8.46e-74	4.73653	5.4465	1.01e-47	5.01006	5.4465	5.08e-52	0.827295	NA	NA	NA	NA	NA	30,31	Intestine,Cathepsin+ cell	4	NA	NA
dd_Smed_v6_7447_0_1	SLC6A1	Sodium- and chloride-dependent GABA transporter 1	1.24e-17	4.12773	4.86891	2.42e-35	3.5353	4.86891	2.44e-27	1.50778	Contig1620	1.17055	7.05691	0.00057536	NA	30	Intestine	NA	NA	NA
dd_Smed_v6_7474_0_1	SLC16A4	Monocarboxylate transporter 5	4.79e-16	1.07607	4.31407	0.00224246	0.720387	4.31407	0.0595509	1.27959	PL05015B2E08	0.425975	7.82803	0.100893	NA	NA	NA	NA	NA	NA
dd_Smed_v6_7847_0_1	SLC46A3	Solute carrier family 46 member 3	1.04e-17	2.50536	3.75606	9.48e-10	1.85695	3.75606	6.91e-06	1.56744	Contig2006	1.38736	7.38628	7.5e-05	NA	15,16,19,24,30,34	Cathepsin+ cell,Muscle,Intestine,Epidermal,Neural	5	NA	NA
dd_Smed_v6_8150_0_1	SLC26A5	Prestin	1.03e-116	4.64866	4.31304	7.89e-28	4.91614	4.31304	2.4e-30	0.830773	Contig4920	0.0442237	6.03995	0.70858	NA	30	Intestine	NA	NA	NA
dd_Smed_v6_8244_0_1	SLC2A1	Solute carrier family 2, facilitated glucose transporter member 1	3.86e-100	1.64782	3.16876	0.00020625	1.62821	3.16876	0.00028245	1.01368	Contig1158	-0.0096648	7.11179	0.522878	NA	NA	NA	NA	NA	NA
dd_Smed_v6_8335_0_1	SLC47A1	Multidrug and toxin extrusion protein 1	4.96e-50	7.52144	3.86531	2.53e-40	7.67612	3.86531	1.36e-41	0.898333	NA	NA	NA	NA	NA	30	Intestine	4	NA	NA
dd_Smed_v6_8683_0_1	SLC36A2	Proton-coupled amino acid transporter 2	1.71e-47	6.56909	4.79662	3.41e-33	6.57245	4.79662	3.57e-33	0.997675	NA	NA	NA	NA	NA	30	Intestine	4	NA	NA
dd_Smed_v6_9051_0_1	SLC16A9	Monocarboxylate transporter 9	5.9e-05	3.21513	4.14645	2.67e-16	3.60462	4.14645	1.12e-19	0.763401	Contig3367	0.978951	6.94911	0.00200371	NA	31	Cathepsin+ cell	NA	NA	NA
dd_Smed_v6_9401_0_1	SLC23A2	Solute carrier family 23 member 2	5.05e-92	3.94391	3.3681	1.54e-16	3.10838	3.3681	3.74e-11	1.78452	Contig949	0.229818	6.13054	0.0939829	NA	42	Cathepsin+ cell	NA	NA	NA
dd_Smed_v6_9499_0_1	SLC17A5	Sialin	5.01e-80	3.15125	4.15972	1e-18	3.15799	4.15972	9.49e-19	0.995341	NA	NA	NA	NA	NA	NA	NA	NA	NA	NA
dd_Smed_v6_9513_0_1	SLC47A1	Multidrug and toxin extrusion protein 1	2.95e-58	5.59787	4.11342	2.02e-25	5.43665	4.11342	2.73e-24	1.11823	PL06023A1A07	0.469829	6.41788	0.00899291	NA	30	Intestine	4	NA	NA
dd_Smed_v6_9736_0_1	SLC24A5	Sodium/potassium/calcium exchanger 5	4.72e-58	3.71847	4.16401	9.81e-17	4.25777	4.16401	9.32e-21	0.688105	Contig4163	-0.307138	6.48074	0.0984626	NA	19	Intestine	2,5	NA	NA
dd_Smed_v6_9762_0_1	SLC38A7	Putative sodium-coupled neutral amino acid transporter 7	7.19e-63	1.84046	3.5403	2.42e-05	2.22492	3.5403	3.52e-07	0.766064	NA	NA	NA	NA	NA	31	Cathepsin+ cell	NA	NA	NA
dd_Smed_v6_9814_0_1	SLC46A3	Solute carrier family 46 member 3	4.02e-25	1.51232	3.74445	0.00092898	1.23492	3.74445	0.00922236	1.212	NA	NA	NA	NA	NA	NA	NA	NA	NA	NA
dd_Smed_v6_9846_0_1	SLC8B1	Sodium/potassium/calcium exchanger 6, mitochondrial	5.35e-22	3.22782	3.64517	2.24e-13	3.13044	3.64517	1.18e-12	1.06983	Contig1756	0.569624	7.69226	0.39512	NA	10,17,28,30	Cathepsin+ cell,Intestine	4	NA	NA

## Sheet: S3C. Intestine-enriched Rabs
geneID	uniprot_id_human	uniprot_desc_human	eval_human	logFC_medial	logCPM_medial	FDR_medial	logFC_lateral	logCPM_lateral	FDR_lateral	ML_ratio	phagocyte_EST_ID	phagocyte_log2FC	phagocyte_avgExpr	phagocyte_FDR	WISH_pattern	Fincher_S2_all_clusterIDs	Fincher_S2_all_celltypes	Fincher_intestine_subcluster_IDs	Plass_celltypes	Swapna_Seurat_Cluster
dd_Smed_v6_1037_0_1	RAB32	Ras-related protein Rab-32	9.2e-87	2.64599	7.00811	2.2e-20	2.4488	7.00811	9.3e-18	1.14646	Contig5808	2.48048	10.2417	3.27e-05	NA	10,17,28,30,31,39,41	Cathepsin+ cell,Intestine	4,7	phagocytes,pigment	Gut
dd_Smed_v6_2099_0_1	RAB4A	Ras-related protein Rab-4A	6.02e-82	1.38109	5.81825	6.24e-07	1.25123	5.81825	8.12e-06	1.09418	Contig942	0.8304	8.69624	0.00106692	NA	8,21	Neural	NA	NA	NA
dd_Smed_v6_2486_0_1	RAB24	Ras-related protein Rab-24	4.58e-58	1.86778	5.55737	3.99e-09	1.70063	5.55737	1.05e-07	1.12284	NA	NA	NA	NA	NA	6,10,23,31	Intestine,Cathepsin+ cell,Neural	NA	NA	NA
dd_Smed_v6_2494_0_1	RAB43	Ras-related protein Rab-43	8.58e-86	2.12136	6.68698	1.08e-11	1.9796	6.68698	2.64e-10	1.10325	Contig907	1.42256	9.15185	0.00063502	NA	30	Intestine	4	NA	NA
dd_Smed_v6_2603_0_1	RAB1B	Ras-related protein Rab-1B	1.73e-28	5.37555	6.148	3.74e-35	5.11641	6.148	1.28e-32	1.19677	Contig6579	2.73832	9.11655	0.0006578	NA	30	Intestine	4	NA	NA
dd_Smed_v6_2879_0_1	RAB6A	RAB6A, member RAS oncogene family, isoform CRA_b	1.16e-29	1.4757	4.97615	4.18e-08	1.58704	4.97615	3.84e-09	0.925725	Contig3333	1.73594	8.04854	5.79e-05	NA	10,30	Cathepsin+ cell,Intestine	4	NA	NA
dd_Smed_v6_2906_0_1	RAB10	Ras-related protein Rab-10	2.2e-65	3.923	5.38319	1.21e-27	3.6639	5.38319	1.07e-24	1.19673	Contig985	1.8169	8.60754	5.57e-05	uniform	10,30	Cathepsin+ cell,Intestine	4,7	NA	NA
dd_Smed_v6_2915_0_1	RAB7L1	RAB7, member RAS oncogene family-like 1	8.11e-64	1.47047	5.3073	3.73e-05	1.40586	5.3073	9.63e-05	1.0458	Contig2676	1.71159	8.32613	0.00012918	NA	10,15,17,28,30,39	Cathepsin+ cell,Intestine	NA	NA	NA
dd_Smed_v6_2991_0_1	RAB5A	Ras-related protein Rab-5A	1.17e-67	1.19749	4.86887	0.00184654	1.21629	4.86887	0.00176533	0.987058	Contig1027	0.734666	9.42861	0.00054736	NA	NA	NA	NA	NA	NA
dd_Smed_v6_3164_0_1	RAB14	Ras-related protein Rab-14	3.09e-105	1.46955	4.77532	3.55e-06	1.10432	4.77532	0.00071264	1.28808	Contig3296	0.91047	9.58904	0.00066551	NA	17,24	Cathepsin+ cell,Epidermal	NA	NA	NA
dd_Smed_v6_3267_0_1	RAB10	Ras-related protein Rab-10	4.83e-47	0.691572	3.65917	0.210903	1.39946	3.65917	0.0055844	0.612214	Contig2183	0.485865	7.58271	0.0154288	NA	17	Cathepsin+ cell	NA	NA	NA
dd_Smed_v6_3370_0_1	RAB7A	Ras-related protein Rab-7a	2.83e-84	1.92531	3.69074	1.9e-06	1.56289	3.69074	0.00014209	1.28559	Contig1543	1.2667	7.22332	0.00437587	NA	NA	NA	NA	NA	NA
dd_Smed_v6_3769_0_1	RABGGTB	Geranylgeranyl transferase type-2 subunit beta	2.38e-120	2.32406	2.17021	0.00602759	2.33275	2.17021	0.00661257	0.993999	PL06021A1G10	0.253462	7.85129	0.202568	NA	NA	NA	NA	NA	NA
dd_Smed_v6_3889_0_1	RAB4B	Ras-related protein Rab-4B	6.82e-25	2.47847	4.80438	1.5e-14	2.56677	4.80438	2.12e-15	0.940627	Contig3665	2.09548	9.20143	5.89e-05	NA	10,15,17,28,29,30	Cathepsin+ cell,Protonephridia,Intestine	4	NA	NA
dd_Smed_v6_4001_0_1	RAB18	Ras-related protein Rab-18	9.77e-104	1.13719	4.8116	8.42e-05	0.821906	4.8116	0.00685192	1.24426	Contig2069	0.59393	7.53512	0.0571404	NA	NA	NA	NA	NA	NA
dd_Smed_v6_419_0_1	RAB7A	Ras-related protein Rab-7a	4.76e-104	1.04651	8.03698	0.00017895	0.936271	8.03698	0.0010403	1.07941	Contig1170	1.79274	10.0733	5.38e-05	NA	10,17,24,28,29,30,39,41	Cathepsin+ cell,Epidermal,Protonephridia,Intestine	4	NA	Gut
dd_Smed_v6_4297_0_1	RAB6B	Ras-related protein Rab-6B	4.16e-30	1.37747	5.34382	7.45e-05	1.21916	5.34382	0.00058438	1.11598	Contig1300	0.856484	8.34577	0.00145801	NA	10,17,28,31,41	Cathepsin+ cell	NA	NA	NA
dd_Smed_v6_488_0_1	RAB1A	Ras-related protein Rab-1A	9.09e-119	1.16832	8.19754	2.71e-05	1.01403	8.19754	0.00035714	1.11287	Contig3635	1.30006	10.2251	0.00049642	NA	2,3	Epidermal	NA	NA	Early_epithelial_progeny
dd_Smed_v6_491_0_1	RAB7A	Ras-related protein Rab-7a	1.24e-117	2.54047	7.54175	1.45e-14	2.35379	7.54175	1.03e-12	1.13814	Contig614	2.46969	10.6144	2.44e-05	NA	15,17,24,29,30,31	Cathepsin+ cell,Epidermal,Protonephridia,Intestine	4	NA	NA
dd_Smed_v6_4964_0_1	RAB11A	Ras-related protein Rab-11A	1.1e-58	2.42162	2.3182	0.0001571	3.03608	2.3182	2.66e-06	0.653173	Contig2392	1.16704	7.69647	0.00089794	NA	24,25,27,30,35,40,42	Epidermal,Pharynx,Intestine,Protonephridia,Cathepsin+ cell	4	NA	NA
dd_Smed_v6_5049_0_1	RAB6A	Ras-related protein Rab-6A	6.13e-17	4.19188	4.26534	8.4e-24	4.23284	4.26534	3.69e-24	0.97201	Contig3247	1.21475	7.19734	0.00262216	NA	6,10,28,30,31	Intestine,Cathepsin+ cell	NA	NA	NA
dd_Smed_v6_5961_0_1	RABEP1	Rab GTPase-binding effector protein 1	1.4e-20	1.50481	4.00618	2.66e-05	1.74026	4.00618	1.18e-06	0.849422	NA	NA	NA	NA	NA	NA	NA	NA	NA	NA
dd_Smed_v6_6128_0_1	RAB32	Ras-related protein Rab-32	2.5e-54	2.31962	3.58473	1.85e-08	2.39258	3.58473	7.62e-09	0.950681	NA	NA	NA	NA	NA	10,28,30,31	Cathepsin+ cell,Intestine	4	NA	NA
dd_Smed_v6_6588_0_1	RAB9B	Ras-related protein Rab-9B	5.08e-52	7.05709	4.04267	1.57e-28	7.33574	4.04267	3.87e-30	0.824366	Contig5949	2.7768	9.67828	0.00064886	NA	30	Intestine	4	NA	NA
dd_Smed_v6_7052_0_1	RAB5B	Ras-related protein Rab-5B	1.48e-52	2.37587	4.27178	1.01e-09	2.26348	4.27178	6.76e-09	1.08102	Contig7318	1.64692	7.48865	0.00105817	NA	NA	NA	NA	NA	NA
dd_Smed_v6_7183_0_1	RABGGTA	Geranylgeranyl transferase type-2 subunit alpha	6.15e-93	1.59398	3.50697	0.00130212	1.30772	3.50697	0.0111089	1.21947	NA	NA	NA	NA	NA	4,15,26	Cathepsin+ cell,Protonephridia	NA	NA	NA
dd_Smed_v6_7979_0_1	RAB43	Ras-related protein Rab-43	1.71e-08	5.43175	3.90321	1.77e-40	5.58088	3.90321	2.87e-42	0.901793	Contig44	1.81457	7.64612	5.53e-05	NA	NA	NA	NA	NA	NA
dd_Smed_v6_867_0_1	RAB11B	Ras-related protein Rab-11B	3.03e-111	1.6557	7.29255	1.13e-09	1.54545	7.29255	1.64e-08	1.07941	Contig1193	1.73574	9.92027	8.5e-05	NA	17,29,30,37,40	Cathepsin+ cell,Protonephridia,Intestine,Pharynx	4	NA	NA
dd_Smed_v6_9150_0_1	RAB5B	Ras-related protein Rab-5B	5.29e-36	6.30066	3.36453	4.75e-30	5.78392	3.36453	2.82e-26	1.43072	Contig6797	1.29004	7.40852	0.00218684	NA	30	Intestine	4	NA	NA
dd_Smed_v6_9518_0_1	RAB7A	Ras-related protein Rab-7a	3.78e-33	2.44367	2.41549	6.64e-05	2.60278	2.41549	2.45e-05	0.89558	Contig1183	0.36358	6.00363	0.212727	NA	NA	NA	NA	NA	NA

## Sheet: S3D. Intestine-enriched TRAFs
geneID	uniprot_id_human	uniprot_desc_human	eval_human	logFC_medial	logCPM_medial	FDR_medial	logFC_lateral	logCPM_lateral	FDR_lateral	ML_ratio	phagocyte_EST_ID	phagocyte_log2FC	phagocyte_avgExpr	phagocyte_FDR	WISH_pattern	Fincher_S2_all_clusterIDs	Fincher_S2_all_celltypes	Fincher_intestine_subcluster_IDs	Plass_celltypes	Swapna_Seurat_Cluster
dd_Smed_v6_10917_0_1	TRAF6	TNF receptor-associated factor 6	3.46e-06	4.22413	4.54734	6.39e-19	3.9597	4.54734	4.87e-17	1.20116	NA	NA	NA	NA	NA	30	Intestine	4	NA	NA
dd_Smed_v6_1163_0_1	TRAF6	TNF receptor-associated factor 6	7.42e-05	1.9301	7.89997	7.72e-11	2.00106	7.89997	1.84e-11	0.952002	Contig5533	3.02547	9.79346	4.33e-05	NA	10,30,31,39,42	Cathepsin+ cell,Intestine	4	NA	NA
dd_Smed_v6_12190_0_1	TRAF3	TNF receptor-associated factor 3	4.69e-07	1.98063	2.71227	0.00078954	2.53026	2.71227	1.86e-05	0.683195	NA	NA	NA	NA	NA	NA	NA	NA	NA	NA
dd_Smed_v6_1308_0_1	TRAF2	TNF receptor-associated factor 2	2.06e-10	5.46237	7.38743	6.59e-57	5.24167	7.38743	1.76e-53	1.1653	Contig4033	2.76581	8.99044	2.44e-05	NA	30	Intestine	4,7	phagocytes	Gut
dd_Smed_v6_13811_0_1	TRAF6	TNF receptor-associated factor 6	6.85e-11	7.36062	2.48842	6.39e-20	7.16265	2.48842	4.63e-19	1.14708	PL08008A1G07	1.72056	7.43695	0.00164875	NA	NA	NA	NA	NA	NA
dd_Smed_v6_1439_0_1	TRAF6	TNF receptor-associated factor 6	1.19e-22	1.23262	5.68994	5.03e-06	1.01266	5.68994	0.00024512	1.1647	Contig4173	0.469025	7.90418	0.0068361	NA	10,15,17,19,28,29,30,41,43	Cathepsin+ cell,Intestine,Protonephridia	NA	NA	NA
dd_Smed_v6_14614_0_1	TRAF6	TNF receptor-associated factor 6	6.01e-10	5.10771	2.72513	1.39e-12	4.80531	2.72513	2.03e-11	1.23319	NA	NA	NA	NA	NA	NA	NA	NA	NA	NA
dd_Smed_v6_15049_0_1	TRAF6	TNF receptor-associated factor 6	0.000549	8.18391	0.963561	7.15e-10	7.31339	0.963561	2.71e-08	1.82832	PL06019B2F05	0.122338	6.32002	0.483433	NA	NA	NA	NA	NA	NA
dd_Smed_v6_18520_0_1	TRAF4	TNF receptor-associated factor 4	1.61e-05	2.12474	1.82892	0.00882858	0.835444	1.82892	0.396875	2.44409	NA	NA	NA	NA	NA	NA	NA	NA	NA	NA
dd_Smed_v6_19217_0_1	TRAF5	TNF receptor-associated factor 5	4.82e-10	4.60506	1.61416	4.84e-06	4.27291	1.61416	2.16e-05	1.25889	NA	NA	NA	NA	NA	NA	NA	NA	NA	NA
dd_Smed_v6_2277_0_1	TRAF6	TNF receptor-associated factor 6	3.33e-06	1.07775	5.0223	0.0030771	1.58142	5.0223	9.15e-06	0.705311	Contig1182	0.747643	6.98263	0.280856	NA	NA	NA	NA	NA	NA
dd_Smed_v6_2391_0_1	TRAF6	TNF receptor-associated factor 6	9.19e-07	1.29562	6.0109	0.00019924	1.22396	6.0109	0.00053848	1.05093	Contig1407	0.938036	7.655	0.00026282	NA	10,15,17,28	Cathepsin+ cell	NA	NA	NA
dd_Smed_v6_2599_0_1	TRAF5	TNF receptor-associated factor 5	1.24e-10	3.49252	5.72689	4.11e-31	3.36866	5.72689	2.92e-29	1.08964	Contig1736	2.61056	8.5035	3.74e-05	NA	10,30	Cathepsin+ cell,Intestine	4	NA	NA
dd_Smed_v6_2669_0_1	TRAF3	TNF receptor-associated factor 3	4.51e-32	2.31387	5.26936	1.64e-16	2.29654	5.26936	3.03e-16	1.01208	Contig3390	1.96811	7.73085	4.14e-05	NA	10,30,41	Cathepsin+ cell,Intestine	4	NA	NA
dd_Smed_v6_3038_0_1	TRAF6	TNF receptor-associated factor 6	7.47e-11	2.28913	7.35248	3.93e-16	2.16356	7.35248	1.49e-14	1.09093	Contig1922	1.85153	7.63583	0.0005132	NA	10,28,30	Cathepsin+ cell,Intestine	4	NA	NA
dd_Smed_v6_3097_0_1	TRAF5	TNF receptor-associated factor 5	7.26e-29	6.02582	6.22977	7.04e-55	5.87394	6.22977	8.23e-53	1.11101	PL06023A1F09	0.389049	6.44993	0.0316421	NA	19,30,35	Intestine,Epidermal	5,7	NA	NA
dd_Smed_v6_3562_0_1	TRAF6	TNF receptor-associated factor 6	7.94e-08	1.98379	4.35592	1.38e-07	2.21658	4.35592	4.48e-09	0.850991	Contig4866	1.62646	7.58137	0.00011825	NA	NA	NA	NA	NA	NA
dd_Smed_v6_3650_0_1	TRAF5	TNF receptor-associated factor 5	2.2e-13	2.49156	6.18975	1.59e-20	2.3135	6.18975	5.86e-18	1.13136	Contig407	1.82055	8.52064	3.8e-05	NA	NA	NA	NA	NA	NA
dd_Smed_v6_3706_0_1	TRAF3	TNF receptor-associated factor 3	1.15e-21	1.17197	5.81654	0.00016854	0.98115	5.81654	0.0022426	1.14141	Contig52	0.680472	7.15845	0.0107101	NA	NA	NA	NA	NA	NA
dd_Smed_v6_4148_0_1	TRAF2	TNF receptor-associated factor 2	8.73e-62	3.0288	3.96701	5.87e-15	3.07057	3.96701	2.96e-15	0.971459	PL05005B2B04	2.22524	8.02832	0.00064886	NA	10,17,30,39,41	Cathepsin+ cell,Intestine	4	NA	NA
dd_Smed_v6_4368_0_1	TRAF2	TNF receptor-associated factor 2	7.46e-54	1.37863	4.28072	2.23e-05	1.32591	4.28072	5.41e-05	1.03722	Contig1909	0.604757	7.91993	0.00877904	NA	NA	NA	NA	NA	NA
dd_Smed_v6_4392_0_1	TRAF3	TNF receptor-associated factor 3	1.05e-51	2.40815	1.7852	0.00273518	2.67509	1.7852	0.0009569	0.831077	NA	NA	NA	NA	NA	2,3,6,10,11,20,25,27,35,37	Epidermal,Intestine,Cathepsin+ cell,Neural,Pharynx	0,5,7	NA	Early_epithelial_progeny
dd_Smed_v6_4729_0_1	TRAF3	TNF receptor-associated factor 3	1.3e-17	1.99557	4.07147	1.17e-07	2.07669	4.07147	4e-08	0.945324	Contig4173	0.469025	7.90418	0.0068361	NA	19,30,38	Intestine,Parapharyngeal	NA	NA	NA
dd_Smed_v6_5254_0_1	TRAF3	TNF receptor-associated factor 3	7.12e-13	4.0471	3.68988	8.94e-15	3.80012	3.68988	2.57e-13	1.18672	NA	NA	NA	NA	NA	10,30	Cathepsin+ cell,Intestine	4	NA	NA
dd_Smed_v6_5460_0_1	TRAF3	TNF receptor-associated factor 3	6.59e-15	1.3936	3.95529	0.00216341	1.07647	3.95529	0.0244262	1.24585	PL06022B2D05	0.505147	8.16833	0.0255478	NA	NA	NA	NA	NA	NA
dd_Smed_v6_5510_0_1	TRAF3	TNF receptor-associated factor 3	1.44e-06	4.7388	4.89635	1.7e-32	4.52229	4.89635	3.67e-30	1.16192	Contig1559	1.90384	7.81383	6.13e-05	NA	30	Intestine	4	NA	NA
dd_Smed_v6_5689_0_1	TRAF3	TNF receptor-associated factor 3	9.08e-21	2.84139	3.88001	1.13e-10	2.79219	3.88001	2.65e-10	1.03469	NA	NA	NA	NA	NA	10,28	Cathepsin+ cell	NA	NA	NA
dd_Smed_v6_5715_0_1	TRAF6	TNF receptor-associated factor 6	6.04e-14	2.45109	4.41664	4.69e-15	2.16924	4.41664	4.18e-12	1.21575	Contig1145	1.78232	6.83884	0.00032082	NA	30	Intestine	NA	NA	NA
dd_Smed_v6_6054_0_1	TRAF6	TNF receptor-associated factor 6	1.33e-09	2.07785	3.94396	5.56e-07	1.82773	3.94396	1.29e-05	1.18931	NA	NA	NA	NA	NA	17	Cathepsin+ cell	NA	NA	NA
dd_Smed_v6_6485_0_1	TRAF3	TNF receptor-associated factor 3	1.68e-28	3.78934	5.21934	7.74e-21	4.0121	5.21934	8.41e-23	0.856924	NA	NA	NA	NA	NA	6,10,19,30	Intestine,Cathepsin+ cell	2	NA	NA
dd_Smed_v6_6768_0_1	TRAF3	TNF receptor-associated factor 3	1.76e-18	2.85941	3.80738	1.95e-10	3.24187	3.80738	9.24e-13	0.767128	Contig1753	1.28178	7.03179	0.00214822	NA	10,28,30	Cathepsin+ cell,Intestine	4	NA	NA
dd_Smed_v6_7950_0_1	TRAF3	TNF receptor-associated factor 3	1.21e-14	3.63361	4.33987	2.81e-17	3.64856	4.33987	2.41e-17	0.989695	NA	NA	NA	NA	NA	6,10,19,30,43	Intestine,Cathepsin+ cell	4	phagocytes,ldlrr-1+ parenchymal cells	NA
dd_Smed_v6_8228_0_1	TRAF2	TNF receptor-associated factor 2	1.91e-21	6.38534	5.23131	1.02e-52	6.32009	5.23131	7.1e-52	1.04627	NA	NA	NA	NA	NA	30	Intestine	4	NA	NA
dd_Smed_v6_9703_0_1	TRAF6	TNF receptor-associated factor 6	4.29e-10	1.54349	3.92375	4.18e-05	1.07733	3.92375	0.00635204	1.38142	NA	NA	NA	NA	NA	8,9,10,12,18,20,21,23,27,30	Neural,Cathepsin+ cell,Parapharyngeal,Pharynx,Intestine	4	NA	NA
dd_Smed_v6_974_0_1	TRAF4	TNF receptor-associated factor 4	1.33e-27	2.22497	6.80433	7.34e-14	2.11536	6.80433	1.25e-12	1.07894	Contig4200	2.22278	9.00773	7.82e-05	NA	6,10,15,17,28,30	Intestine,Cathepsin+ cell	4	NA	NA

## Sheet: LEGEND
Supplementary File 3. Intestinal Transcripts in Gene Ontology Categories.
Worksheet		Legend
S3A		Examples of transcripts annotated with digestive physiology-related GO Biological Process Terms.
S3B		Transcripts predicted to encode intestine-enriched solute carrier proteins (SLCs).
S3C		Transcripts predicted to encode intestine-enriched Rab GTPases.
S3D		Transcripts predicted to encode intestine-enriched tumor necrosis factor receptor associated factors (TRAFs).
Columns (S3A)		A	GO Functional Category
		B	Putative Function
		C	dd_Smed_v6 gene ID
		D-F	top BLASTX hits vs. uniprot human, uniprot description and e-value
		G-I	log fold-change, log CPM, and FDR-adjusted p values for medial intestine replicates vs. non-gut biological replicates.
		J-L	log fold-change, log CPM, and FDR-adjusted p values for lateral intestine replicates vs. non-gut biological replicates.
		M	ratio of medial to lateral fold changes
		N-Q	EST_ID and phagocyte microarray expression data from Forsthoefel et al., Dev. Cell, 2012: log2 fold-change, average expression, and FDR-adjusted p values.
		R	Pattern observed in WISH experiment.
		S	Fincher et al., Science, 2018 (Table S2) global cluster IDs for all LCM intestine-enriched transcripts
		T	Fincher et al., Science, 2018 (Table S2) cell types for all LCM intestine-enriched transcripts
		U	Fincher et al., Science, 2018 (Table S2) intestine subcluster IDs for all LCM intestine-enriched transcripts
		V	All cell type assignments from Plass et al., Science, 2018 (Table S3). Reprinted with permission from AAAS.
		W	All cell type assignments in Swapna et al., Genome Biol., 2018 (Seurat clusters in Additional File on "figshare")
Columns (S3B-D)		A	dd_Smed_v6 gene ID
		B-D	top BLASTX hits vs. uniprot human, uniprot description and e-value
		E-G	log fold-change, log CPM, and FDR-adjusted p values for medial intestine replicates vs. non-gut biological replicates.
		H-J	log fold-change, log CPM, and FDR-adjusted p values for lateral intestine replicates vs. non-gut biological replicates.
		K	ratio of medial to lateral fold changes
		L-O	EST_ID and phagocyte microarray expression data from Forsthoefel et al., Dev. Cell, 2012: log2 fold-change, average expression, and FDR-adjusted p values.
		P	Pattern observed in WISH experiment.
		Q	Fincher et al., Science, 2018 (Table S2) global cluster IDs for all LCM intestine-enriched transcripts
		R	Fincher et al., Science, 2018 (Table S2) cell types for all LCM intestine-enriched transcripts
		S	Fincher et al., Science, 2018 (Table S2) intestine subcluster IDs for all LCM intestine-enriched transcripts
		T	All cell type assignments from Plass et al., Science, 2018 (Table S3). Reprinted with permission from AAAS.
		U	All cell type assignments in Swapna et al., Genome Biol., 2018 (Seurat clusters in Additional File on "figshare")
