# Supplementary material for: Cell-type diversity and regionalized gene expression in the planarian intestine
Source: eLife. 2020 Apr 2;9:e52613. doi: 10.7554/eLife.52613 (PMC7117911; doi:10.7554/eLife.52613)
Supplement: Supplementary file 4. — Examples of intestine-enriched transcripts (LCM) with human RBH homologs enriched in human digestive tissues at the transcript level (Uhlén et al., 2015). Transcript entries include LCM RNA-Seq data, together with WISH patterns, phagocyte expression, and single-cell RNA-Seq data. Single-cell data from Plass et al. (2018) reprinted with permission from AAAS. [file elife-52613-supp4.xlsx]

## Sheet: HPA enrichment examples
Category	dd_Smed_v6_ID	UniProtKB_ID	ensg_id	description	display_name	category	elevated_tissues	putative_function(s)	logFC_medial	logCPM_medial	FDR_medial	logFC_lateral	logCPM_lateral	FDR_lateral	ML_ratio	phagocyte_EST_ID	phagocyte_log2FC	phagocyte_avgExpr	phagocyte_FDR	WISH_pattern	Fincher_S2_all_clusterIDs	Fincher_S2_all_celltypes	Fincher_intestine_subcluster_IDs	Plass_celltypes	Swapna_Seurat_Cluster
Enriched in duodenum and/or small intestine	dd_Smed_v6_1694_0_1	Q14541	ENSG00000164749	hepatocyte nuclear factor 4, gamma	HNF4G	Tissue enhanced	duodenum, small intestine	endodermal specification	2.09332	6.87078	2.66e-16	1.69013	6.87078	4.27e-11	1.32243	Contig5288	0.848041	7.56078	0.000552714	uniform	4,6,10,15,17,19,22,28,31,39,41,42	Cathepsin+ cell,Intestine,Neoblast	NA	pgrn+ parenchymal cells,aqp+ parenchymal cells,pigment,parenchymal progenitors	NA
	dd_Smed_v6_11330_0_1	Q12908	ENSG00000125255	solute carrier family 10 (sodium/bile acid cotransporter), member 2	SLC10A2	Group enriched	duodenum,kidney,small intestine	sodium/bile transporter	1.41597	2.96163	0.0148804	1.82234	2.96163	0.0014837	0.754522	NA	NA	NA	NA	basal low	16,19,28,31	Muscle,Intestine,Cathepsin+ cell	2,5	NA	NA
	dd_Smed_v6_4947_0_1	Q3SYC2	ENSG00000166391	monoacylglycerol O-acyltransferase 2	MOGAT2	Group enriched	colon,duodenum,liver,rectum,small intestine	lipid absorption	2.7576	5.71858	3.35e-18	2.67087	5.71858	3.5e-17	1.06196	Contig4052	-0.460223	7.58368	0.0175441	basal; noisy	6,19	Intestine	0,7	NA	NA
	dd_Smed_v6_2472_0_1	O75907	ENSG00000185000	diacylglycerol O-acyltransferase 1	DGAT1	Group enriched	duodenum,small intestine	triglyceride biosynthesis	3.25721	4.30246	3.52e-14	2.99748	4.30246	2.68e-12	1.19726	PL03018A2H07	0.352012	7.16414	0.0789209	NA	NA	NA	NA	NA	NA
	dd_Smed_v6_6663_0_1	Q2M3M2	ENSG00000117834	solute carrier family 5 (sodium/sugar cotransporter), member 9	SLC5A9	Group enriched	duodenum,small intestine	glucose transport	4.11358	3.67485	7.9e-25	3.56608	3.67485	1.56e-19	1.46156	PL05005B2B08	0.705551	7.14025	0.00578229	uniform low; protonephridia	29	Protonephridia	NA	NA	NA
	dd_Smed_v6_2690_0_1	Q6P1J6	ENSG00000163803	phospholipase B1	PLB1	Tissue enhanced	small intestine	lipid absorption	7.46295	6.38098	2.45e-35	7.24951	6.38098	6.14e-34	1.15945	Contig3451	3.2808	9.69528	3.32e-05	uniform subset	30	Intestine	4	NA	NA
Enriched in liver	dd_Smed_v6_1655_0_1	Q96N76	ENSG00000159650	urocanate hydratase 1	UROC1	Tissue enriched	liver	histidine catabolism	5.07174	7.76772	4.55e-48	4.93504	7.76772	4.52e-46	1.09938	Contig1949	0.318471	8.22037	0.066789	basal	6,19,30	Intestine	5,7	NA	NA
	dd_Smed_v6_3550_0_1	P48775	ENSG00000151790	tryptophan 2,3-dioxygenase	TDO2	Tissue enriched	liver	tryptophan catabolism	4.05596	4.67463	3.89e-24	4.34584	4.67463	6.28e-27	0.817968	NA	NA	NA	NA	basal	19	Intestine	2,3,5	goblet cells	NA
	dd_Smed_v6_1709_0_1	P09467	ENSG00000165140	fructose-1,6-bisphosphatase 1	FBP1	Tissue enhanced	liver	gluconeogenesis; glucose sensing	1.21723	6.66613	3.23e-05	1.42681	6.66613	1.06e-06	0.864792	Contig2420	-0.469639	9.58457	0.00730408	NA	4,6,7,10,13,16,19,31	Cathepsin+ cell,Intestine,Muscle	2,5	NA	NA
Enriched in duodenum, small intestine, and/or liver	dd_Smed_v6_6609_0_1	Q92887	ENSG00000023839	ATP-binding cassette, sub-family C (CFTR/MRP), member 2	ABCC2	Group enriched	duodenum,gallbladder,kidney,liver,small intestine	xenobiotic compound metabolism	5.04489	6.08439	1.59e-35	5.02728	6.08439	2.5e-35	1.01229	NA	NA	NA	NA	NA	30	Intestine	4,7	NA	NA
	dd_Smed_v6_2257_0_1	P08684	ENSG00000160868	cytochrome P450, family 3, subfamily A, polypeptide 4	CYP3A4	Group enriched	duodenum,liver,small intestine	xenobiotic compound metabolism	3.1366	5.90305	1e-18	3.00787	5.90305	2.12e-17	1.09333	Contig7163	1.53985	8.01637	0.00314838	NA	20,30,33	Neural,Intestine	4	NA	NA
	dd_Smed_v6_2351_0_1	P51589	ENSG00000134716	cytochrome P450, family 2, subfamily J, polypeptide 2	CYP2J2	Tissue enhanced	heart muscle, liver, small intestine	xenobiotic compound metabolism	2.33813	4.67198	7.67e-12	2.32031	4.67198	1.29e-11	1.01243	Contig1511	1.86189	9.13369	7.11e-05	uniform	11,24,30,42	Epidermal,Intestine,Cathepsin+ cell	4	NA	NA
	dd_Smed_v6_5671_0_1	P55157	ENSG00000138823	microsomal triglyceride transfer protein	MTTP	Group enriched	duodenum,liver,small intestine	lipoprotein particle assembly	4.20743	4.78613	4.99e-41	4.1679	4.78613	2.08e-40	1.02778	Contig3678	0.439804	7.28973	0.0129323	NA	6,30	Intestine	4,7	NA	NA
Enriched in gallbladder and/or kidney	dd_Smed_v6_7766_0_1	O75897	ENSG00000198075	sulfotransferase family, cytosolic, 1C, member 4	SULT1C4	Tissue enhanced	gallbladder	xenobiotic compound metabolism	3.63375	4.67196	8.08e-30	3.68314	4.67196	1.8e-30	0.966341	Contig4860	0.423389	7.12203	0.0294233	basal low	NA	NA	5	NA	NA
	dd_Smed_v6_4591_0_1	P19440	ENSG00000100031	gamma-glutamyltransferase 1	GGT1	Tissue enhanced	kidney	glutathione metabolism	2.18001	5.21978	4.01e-15	1.78044	5.21978	1.59e-10	1.31912	Contig1806	1.6097	8.55832	0.000109268	uniform	8,9,12,13,21,23,33,38	Neural,Parapharyngeal,Muscle	NA	NA	NA
	dd_Smed_v6_9107_0_1	O95045	ENSG00000007001	uridine phosphorylase 2	UPP2	Tissue enriched	kidney	uridine/pyrimidine metabolism	3.40344	4.13041	2.27e-22	3.09707	4.13041	5.23e-19	1.2366	NA	NA	NA	NA	low	NA	NA	NA	NA	NA

## Sheet: LEGEND
Supplementary File 4. Intestinal Transcripts with Human Reciprocal Best Hit (RBH) Homologs Enriched in Digestive Tissues
Column		Legend
Columns		A	Human Tissue Enrichment Category
		B	dd_Smed_v6 gene ID
		C	UniProtKB ID
		D	Ensembl gene ID (from Uhlén et al., Science, 2015)
		E	gene description (from Uhlén et al., Science, 2015)
		F	display name/gene abbreviation (from Uhlén et al., Science, 2015)
		G	category of human tissue enrichment (from Uhlén et al., Science, 2015)
		H	tissues in which the human ortholog is elevated (from Uhlén et al., Science, 2015)
		I	putative function (based on GO BP term enrichment)
		J-L	log fold-change, log CPM, and FDR-adjusted p values for medial intestine replicates vs. non-gut biological replicates.
		M-O	log fold-change, log CPM, and FDR-adjusted p values for lateral intestine replicates vs. non-gut biological replicates.
		P	ratio of medial to lateral fold changes
		Q-T	EST_ID and phagocyte microarray expression data from Forsthoefel et al., Dev. Cell, 2012: log2 fold-change, average expression, and FDR-adjusted p values.
		U	Pattern observed in WISH experiment.
		V	Fincher et al., Science, 2018 (Table S2) global cluster IDs for all LCM intestine-enriched transcripts
		W	Fincher et al., Science, 2018 (Table S2) cell types for all LCM intestine-enriched transcripts
		X	Fincher et al., Science, 2018 (Table S2) intestine subcluster IDs for all LCM intestine-enriched transcripts
		Y	All cell type assignments from Plass et al., Science, 2018 (Table S3). Reprinted with permission from AAAS.
		Z	All cell type assignments in Swapna et al., Genome Biol., 2018 (Seurat clusters in Additional File on "figshare")
