# Supplementary material for: Cell-type diversity and regionalized gene expression in the planarian intestine
Source: eLife. 2020 Apr 2;9:e52613. doi: 10.7554/eLife.52613 (PMC7117911; doi:10.7554/eLife.52613)
Supplement: Supplementary file 5. — (S5A) RNAi results for medially enriched transcripts. (S5B) RNAi results for laterally enriched transcripts. (S5C) RNAi results for transcription factors. [file elife-52613-supp5.xlsx]

## Sheet: S5A. Medial transcripts
geneID	uniprot_id_human	uniprot_desc_human	uniprot_id_all5best	uniprot_desc_all5best	RNAi_screen_live_animal_phenotype(s) (8X fed)	ML_ratio	ML_color_code
dd_Smed_v6_131_0_1	NA	NA	NA	NA	ok	2.02552	darkgreen
dd_Smed_v6_1412_0_1	CPA2	Carboxypeptidase A2	CPA2	Carboxypeptidase A2	ok	11.9798	darkgreen
dd_Smed_v6_1523_0_1	PGLYRP3	Peptidoglycan recognition protein 3	PGRP-LB	Peptidoglycan-recognition protein LB	ok	2.33557	darkgreen
dd_Smed_v6_2021_0_1	PI16	Peptidase inhibitor 16	PI16	Peptidase inhibitor 16	ok	2.48679	darkgreen
dd_Smed_v6_214_1_1	GM2A	Ganglioside GM2 activator	GM2A	Ganglioside GM2 activator	ok	4.51208	darkgreen
dd_Smed_v6_254_0_1	BMP1	Bone morphogenetic protein 1	CG7631	Metalloendopeptidase	ok	12.9765	darkgreen
dd_Smed_v6_257_0_1	LIPF	Gastric triacylglycerol lipase	lipf	Lipase	ok	3.20066	darkgreen
dd_Smed_v6_279_0_1	NA	NA	rpz4	Rapunzel 4	ok	11.2902	darkgreen
dd_Smed_v6_3728_0_1	KLK13	Kallikrein-13	KLK13	Kallikrein-13	ok	10.9812	darkgreen
dd_Smed_v6_4693_0_1	LIPF	Gastric triacylglycerol lipase	LIPF	Gastric triacylglycerol lipase	ok	1.98368	green
dd_Smed_v6_634_0_1	NA	NA	rpz4	Zgc:113320	ok	5.91199	darkgreen
dd_Smed_v6_66_0_1	KLK13	Kallikrein-13	Gzmm	Gzmm protein	ok	16.0326	darkgreen
dd_Smed_v6_72_0_1	NA	NA	NA	NA	ok	6.31279	darkgreen
dd_Smed_v6_73_0_1	NPC2	Epididymal secretory protein E1	Npc2	Epididymal secretory protein E1	ok	2.08729	darkgreen
dd_Smed_v6_827_0_1	NA	NA	rpz4	Zgc:113320	ok	11.5751	darkgreen
dd_Smed_v6_975_0_1	KLK13	Kallikrein-13	KLK13	Kallikrein-13	ok	4.41539	darkgreen

## Sheet: S5B. Lateral transcripts
geneID	uniprot_id_human	uniprot_desc_human	uniprot_id_all5best	uniprot_desc_all5best	RNAi_screen_live_animal_phenotype(s) (8X fed)	ML_ratio	ML_color_code
dd_Smed_v6_101_0_1	EPPIN	Eppin	EPPIN	Eppin	ok	0.226803	darkorange
dd_Smed_v6_1401_0_1	NA	NA	NA	NA	ok	0.194399	darkorange
dd_Smed_v6_25_0_1	NID2	Nidogen-2	NID2	Nidogen-2	ok	0.124307	darkorange
dd_Smed_v6_2506_0_1	NA	NA	NA	NA	ok	0.475722	darkorange
dd_Smed_v6_300_0_1	COL6A3	Collagen alpha-3(VI) chain	Spint3	Putative uncharacterized protein	ok	0.196808	darkorange
dd_Smed_v6_31_0_1	CPA6	Carboxypeptidase A6	CT14378	CG8560, isoform A	ok	0.614454	orange
dd_Smed_v6_41_0_1	TFPI	Tissue factor pathway inhibitor	Spint3	Putative uncharacterized protein	ok	0.333972	darkorange
dd_Smed_v6_71_0_1	APLP2	Amyloid-like protein 2	Wfikkn2	WAP, Kazal, immunoglobulin, Kunitz and NTR domain-containing protein 2	ok	0.399732	darkorange

## Sheet: S5C. Transcription factors
geneID	uniprot_id_human	uniprot_desc_human	uniprot_id_all5best	uniprot_desc_all5best	RNAi_screen_live_animal_phenotype(s) (3X fed)	RNAi_screen_goblet_cell_phenotypes (3X fed)
dd_Smed_v6_10103_0_1	RREB1	Ras-responsive element-binding protein 1	rreb1a	Ras-responsive element-binding protein 1a	ok	severe goblet cell reduction in pre-existing branches
dd_Smed_v6_11118_0_1	ZNF281	Zinc finger protein 281	ZNF281	Zinc finger protein 281	ok	ok
dd_Smed_v6_12010_0_1	OVOL1	Putative transcription factor Ovo-like 1	lin-48	Putative zinc finger transcription factor	ok	ok
dd_Smed_v6_12219_0_1	HELZ2	Helicase with zinc finger domain 2	Helz2	Helicase with zinc finger domain 2	ok	ok
dd_Smed_v6_15178_0_1	SIX6	Homeobox protein SIX6	six7	Homeobox protein Six7	ok	ok
dd_Smed_v6_1694_0_1	HNF4G	Hepatocyte nuclear factor 4-gamma	hnf4a	Hepatocyte nuclear factor 4 alpha	lysis/death	ok
dd_Smed_v6_2670_0_1	MED21	Mediator of RNA polymerase II transcription subunit 21	MED21	Mediator of RNA polymerase II transcription subunit 21	small blastemas, lysis	severe goblet cell reduction in regenerating branches
dd_Smed_v6_2716_0_1	NKX2-2	Homeobox protein Nkx-2.2	nkx2.2a	Homeobox protein Nkx-2.2a	lysis/death	ok
dd_Smed_v6_3443_0_1	ZFP37	Zinc finger protein 37 homolog	znf408	Zinc finger protein 408	ok	ok
dd_Smed_v6_3638_0_1	KLF13	Krueppel-like factor 13	cbt	Cabut, isoform B	ok	ok
dd_Smed_v6_4075_0_1	GATA4	Transcription factor GATA-4	GATA4	Transcription factor GATA-4	lysis/death	ok
dd_Smed_v6_4685_0_1	CREB1	CREB1 protein	CREB1	CREB1 protein	ok	ok
dd_Smed_v6_5177_0_1	ZFP64	Zinc finger protein 64 homolog, isoforms 1 and 2	ZFP64	Zinc finger protein 64 homolog, isoforms 1 and 2	reduced feeding, then lysis/death	ok
dd_Smed_v6_5978_0_1	NFAT5	Nuclear factor of activated T-cells 5	Nfat5	Nuclear factor of activated T-cells 5	small blastemas in some head fragments	ok
dd_Smed_v6_6869_0_1	PTF1A	Pancreas transcription factor 1 subunit alpha	Fer1	48 related 1, isoform A	ok	modest goblet cell reduction in lateral branches
dd_Smed_v6_7470_0_1	GLI3	Transcriptional activator GLI3	ci	Transcriptional activator cubitus interruptus	ok	severe goblet cell reduction in regenerating branches
dd_Smed_v6_7863_0_1	MEIS2	Homeobox protein Meis2	meis1a	Meis homeobox 1 a	small blastemas in some head fragments	ok
dd_Smed_v6_7938_0_1	MITF	Microphthalmia-associated transcription factor	Mitf	Microphthalmia-associated transcription factor	reduced feeding, small blastemas/lysis in some fragments	ok
dd_Smed_v6_8176_0_1	HELZ2	Helicase with zinc finger domain 2	HELZ2	Helicase with zinc finger domain 2	ok	ok
dd_Smed_v6_8190_0_1	LHX9	LIM/homeobox protein Lhx9	lhx2b	LIM homeobox 2	ok	modest goblet cell reduction in pre-existing branches
dd_Smed_v6_8252_0_1	LHX1	LIM/homeobox protein Lhx1	LHX1	LIM/homeobox protein Lhx1	ok	ok
dd_Smed_v6_8886_0_1	ELF3	ETS-related transcription factor Elf-3	elf3	E74-like factor 3 (ets domain transcription factor, epithelial-specific )	ok	ok

## Sheet: LEGEND
Supplementary File 5. RNA Interference Results for Intestine-Enriched Transcription Factors and Mediolaterally Enriched Transcripts.
Table		Legend
S5A		Medial transcripts selected for RNAi
S5B		Lateral transcripts selected for RNAi
S5C		Transcription factors selected for RNAi
Columns (S5A, S5B)		A	dd_Smed_v6 gene Id
		B-C	top BLASTX hits and description vs. uniprot human
		D-E	top BLASTX hits and description vs. all 5 organism databases (human, mouse, zebrafish, fruit fly, roundworm)
		F	Live animal phenotypes for RNAi screen (8x fed)
		G	Ratio of medial to lateral fold changes
		H	Color assignment based on mediolateral FC ratio
Columns (S5C)		A	dd_Smed_v6 gene Id
		B-C	top BLASTX hits and description vs. uniprot human
		D-E	top BLASTX hits and description vs. all 5 organism databases (human, mouse, zebrafish, fruit fly, roundworm)
		F	Live animal phenotypes for RNAi screen (3x fed)
		G	Goblet cell phenotypes for RNAi screen (3x fed)
